# Supplementary material for: Crustal structure of the East African Limpopo margin, a strike-slip rifted corridor along the continental Mozambique Coastal Plain and North Natal Valley
Source: Copernicus journal article supplement (doi:10.5194/se-12-1865-2021), 2021-08-20

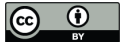

*Supplement of*

## **Crustal structure of the East African Limpopo margin, a strike-slip rifted corridor along the continental Mozambique Coastal Plain and North Natal Valley**

**Mikael Evain et al.**

*Correspondence to:* Mikael Evain ([mikael.evain@ifremer.fr](mailto:mikael.evain@ifremer.fr))

The copyright of individual parts of the supplement might differ from the article licence.



**Figure 1.** Interpreted sedimentary and volcano-sedimentary seismic phases for all MZ3 OBS. For each instrument 6 panels display a) seismic record; b) seismic record with color-coded predicted arrivals; c) synthetic section with color coded predicted arrivals; d) color coded picked travel-times with uncertainty bars overlain by dotted predicted times; e) color coded seismic rays; f) MCS time migrated section with color-coded model interfaces. On a, b, c, and d, travel-time is reduced by a velocity of 5 km/s.

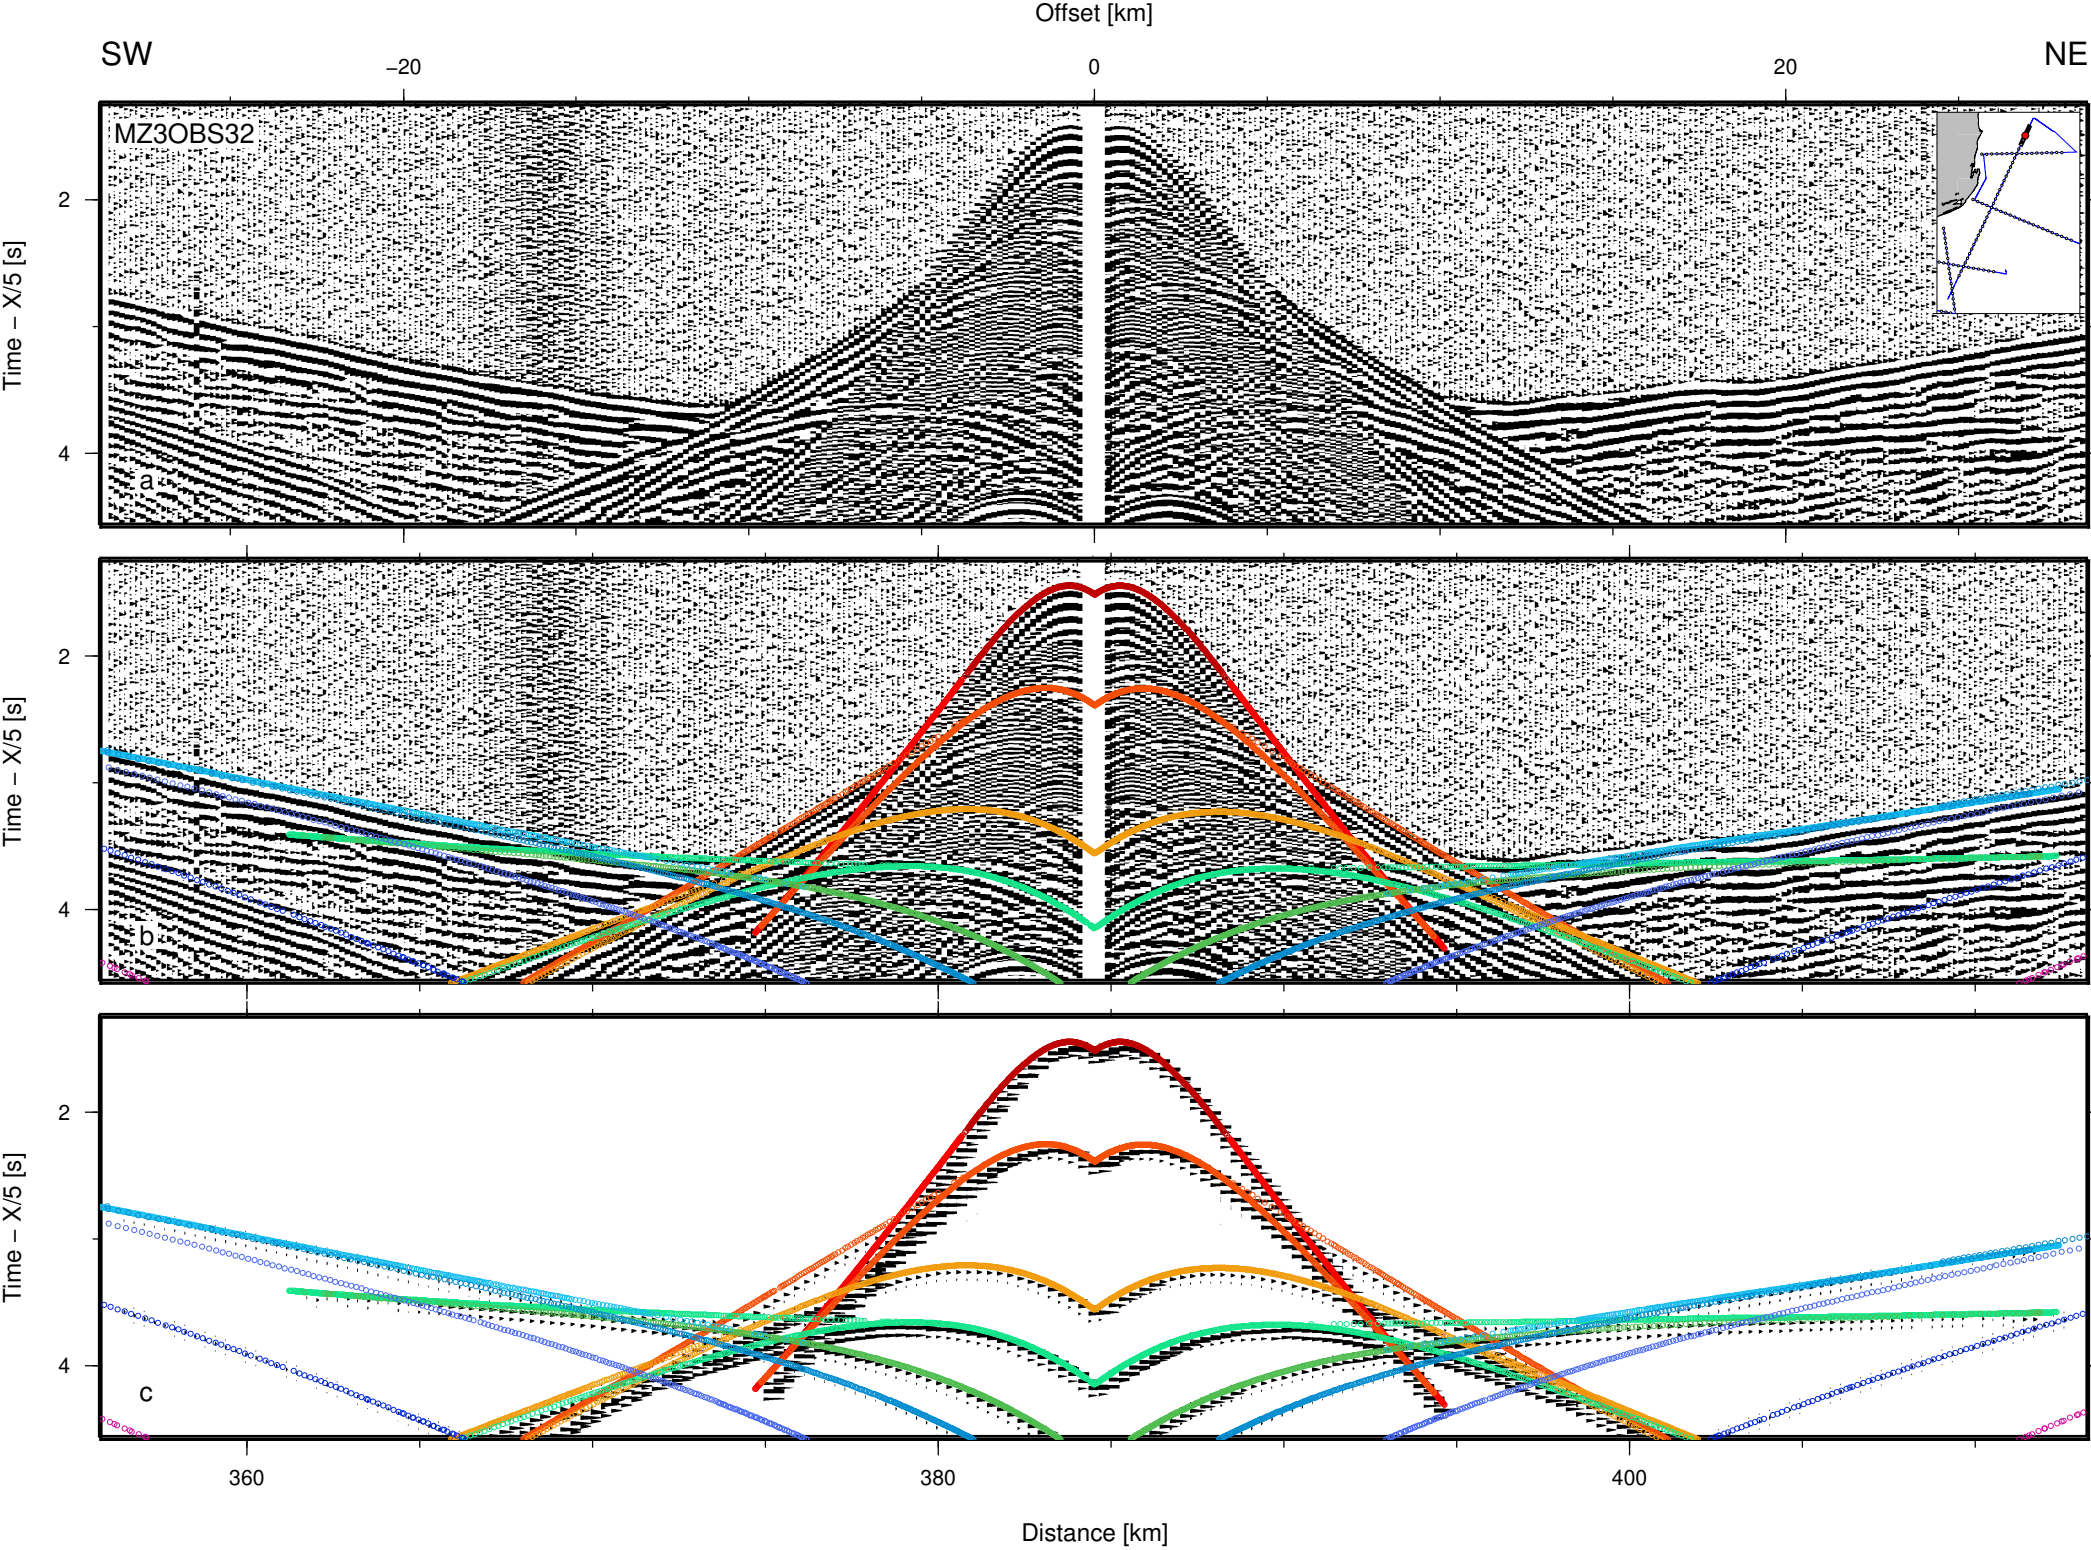



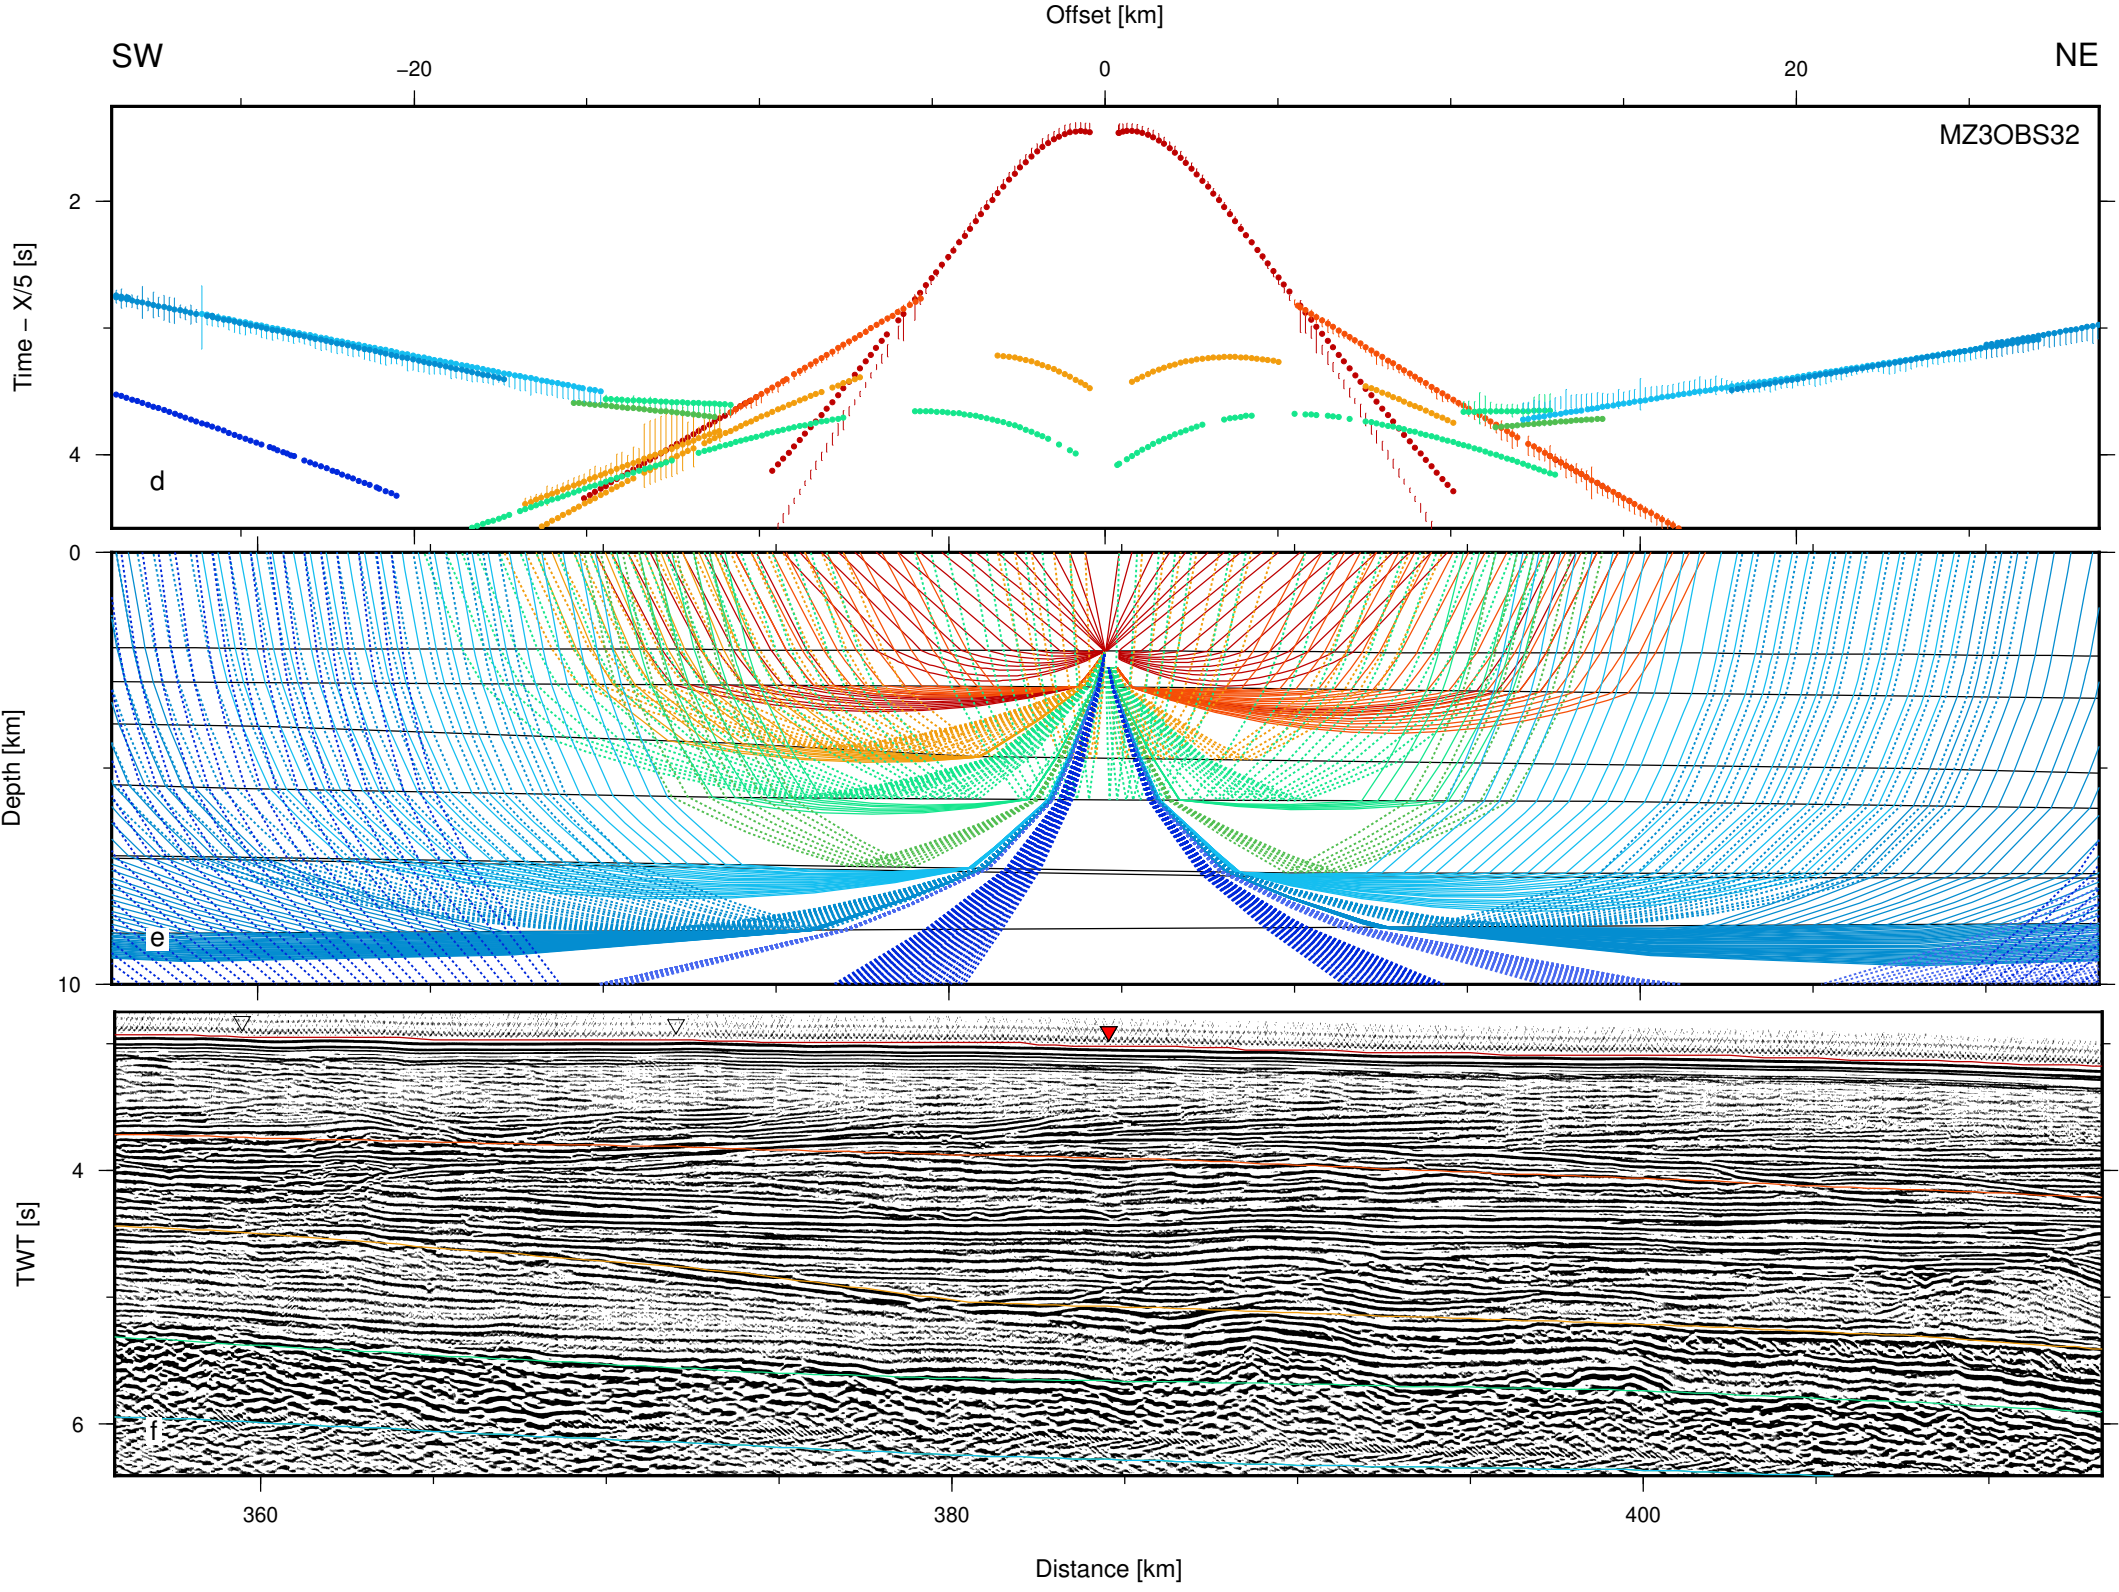



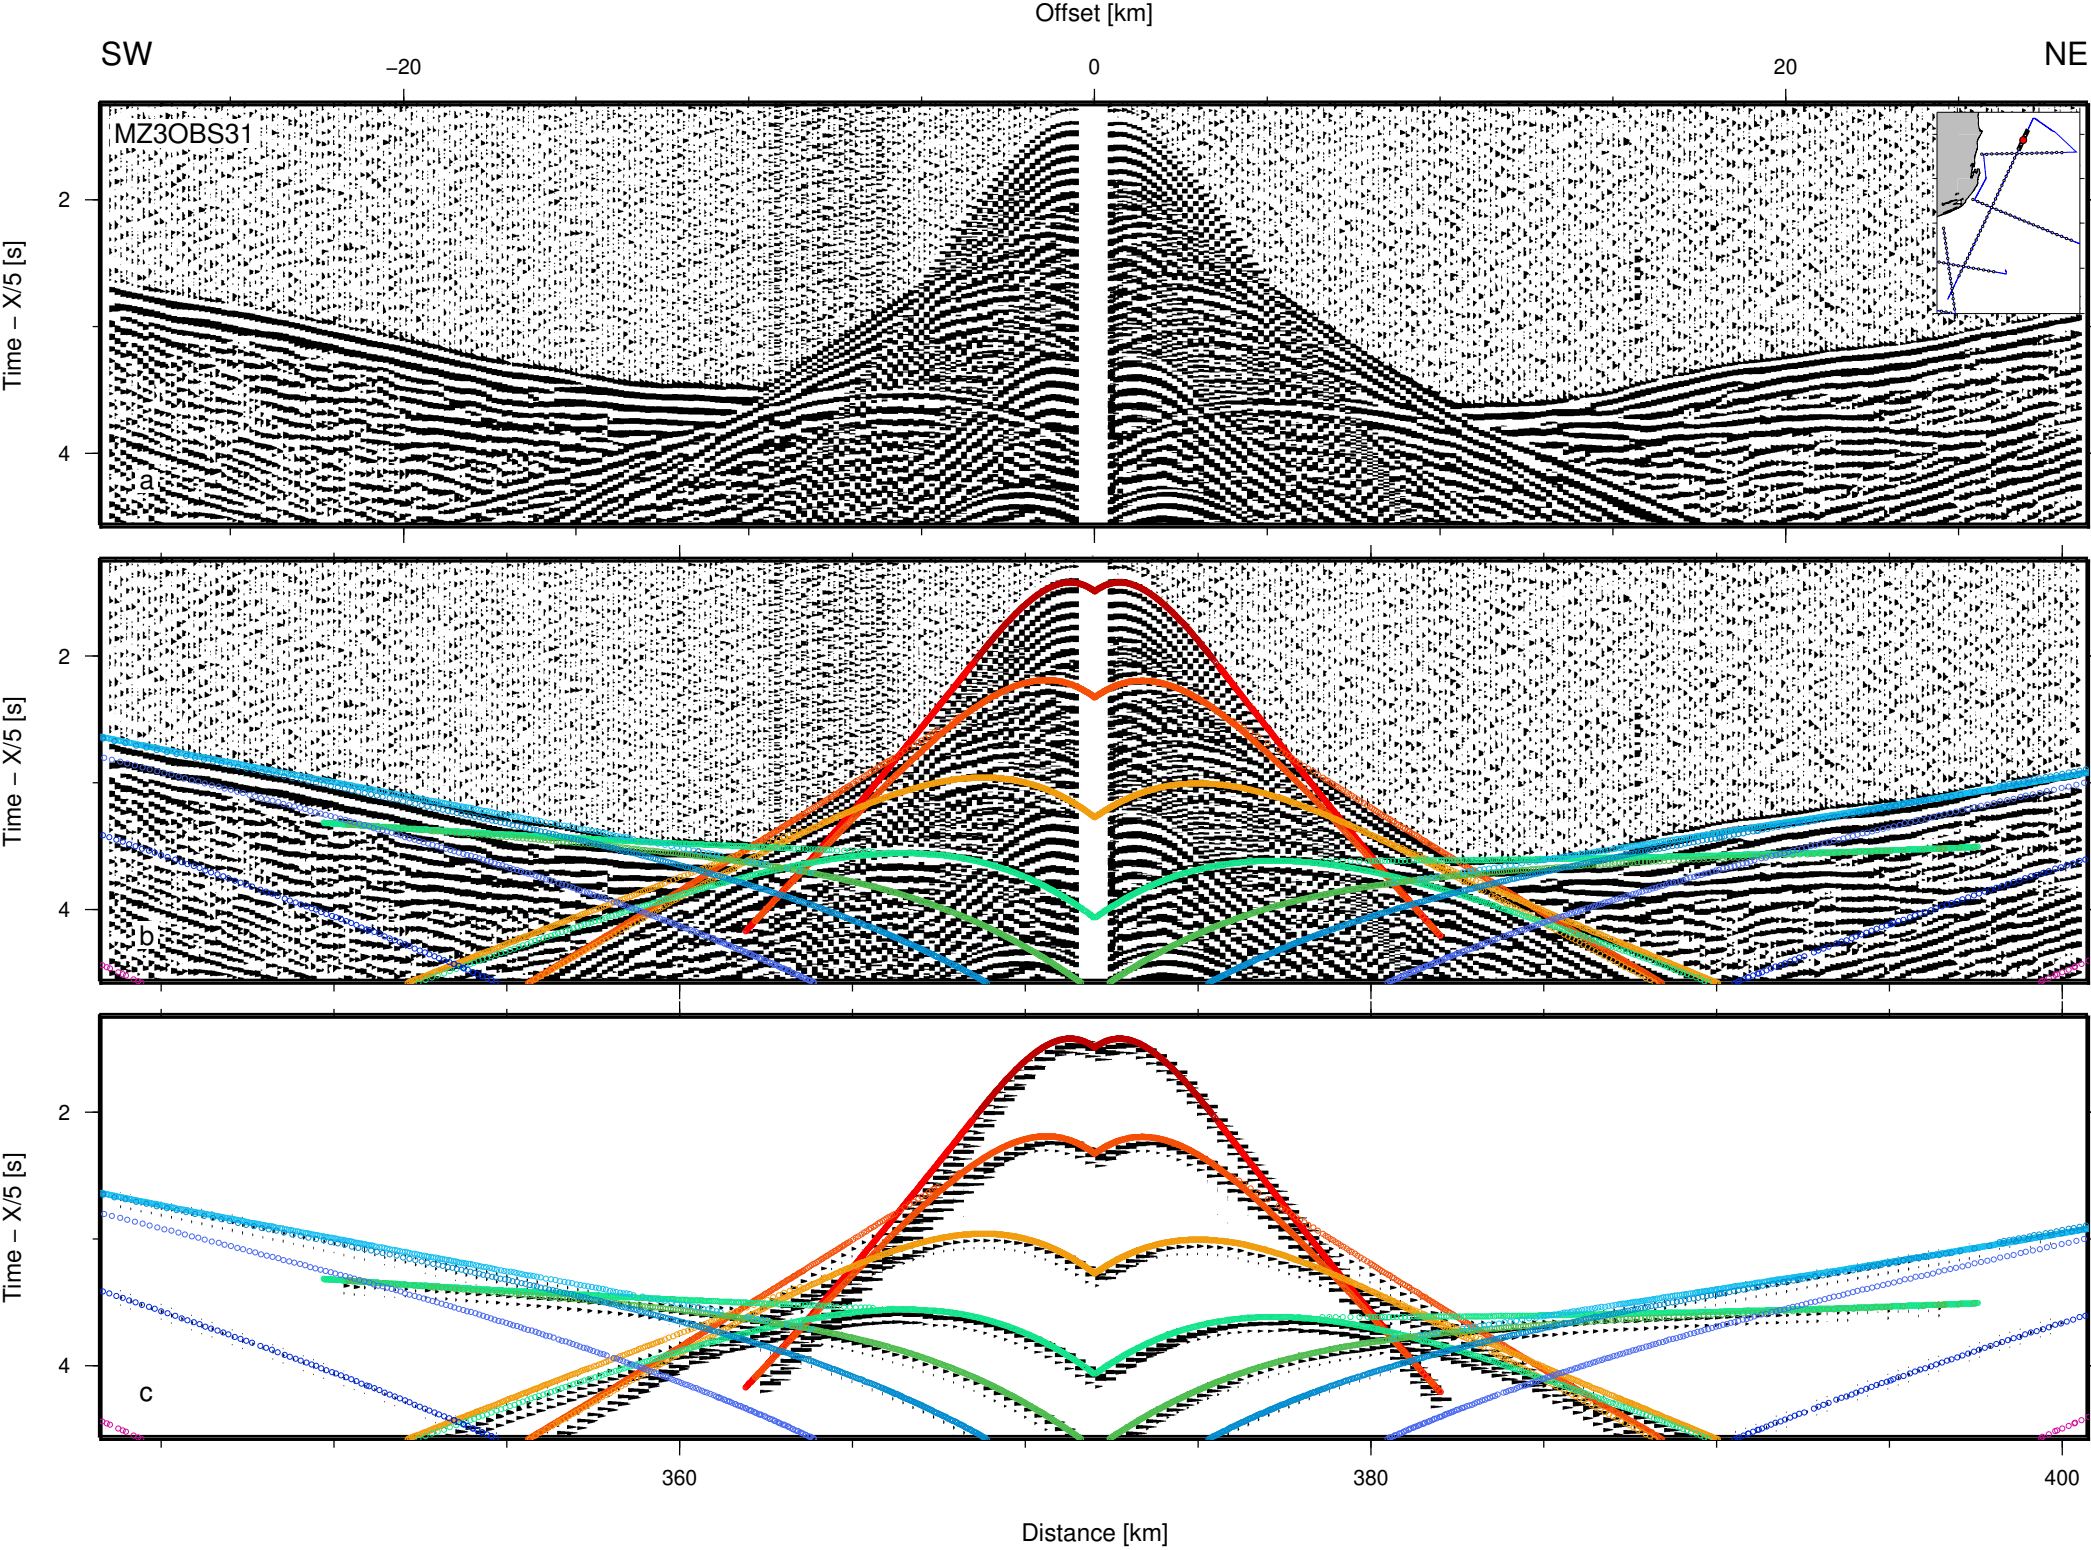



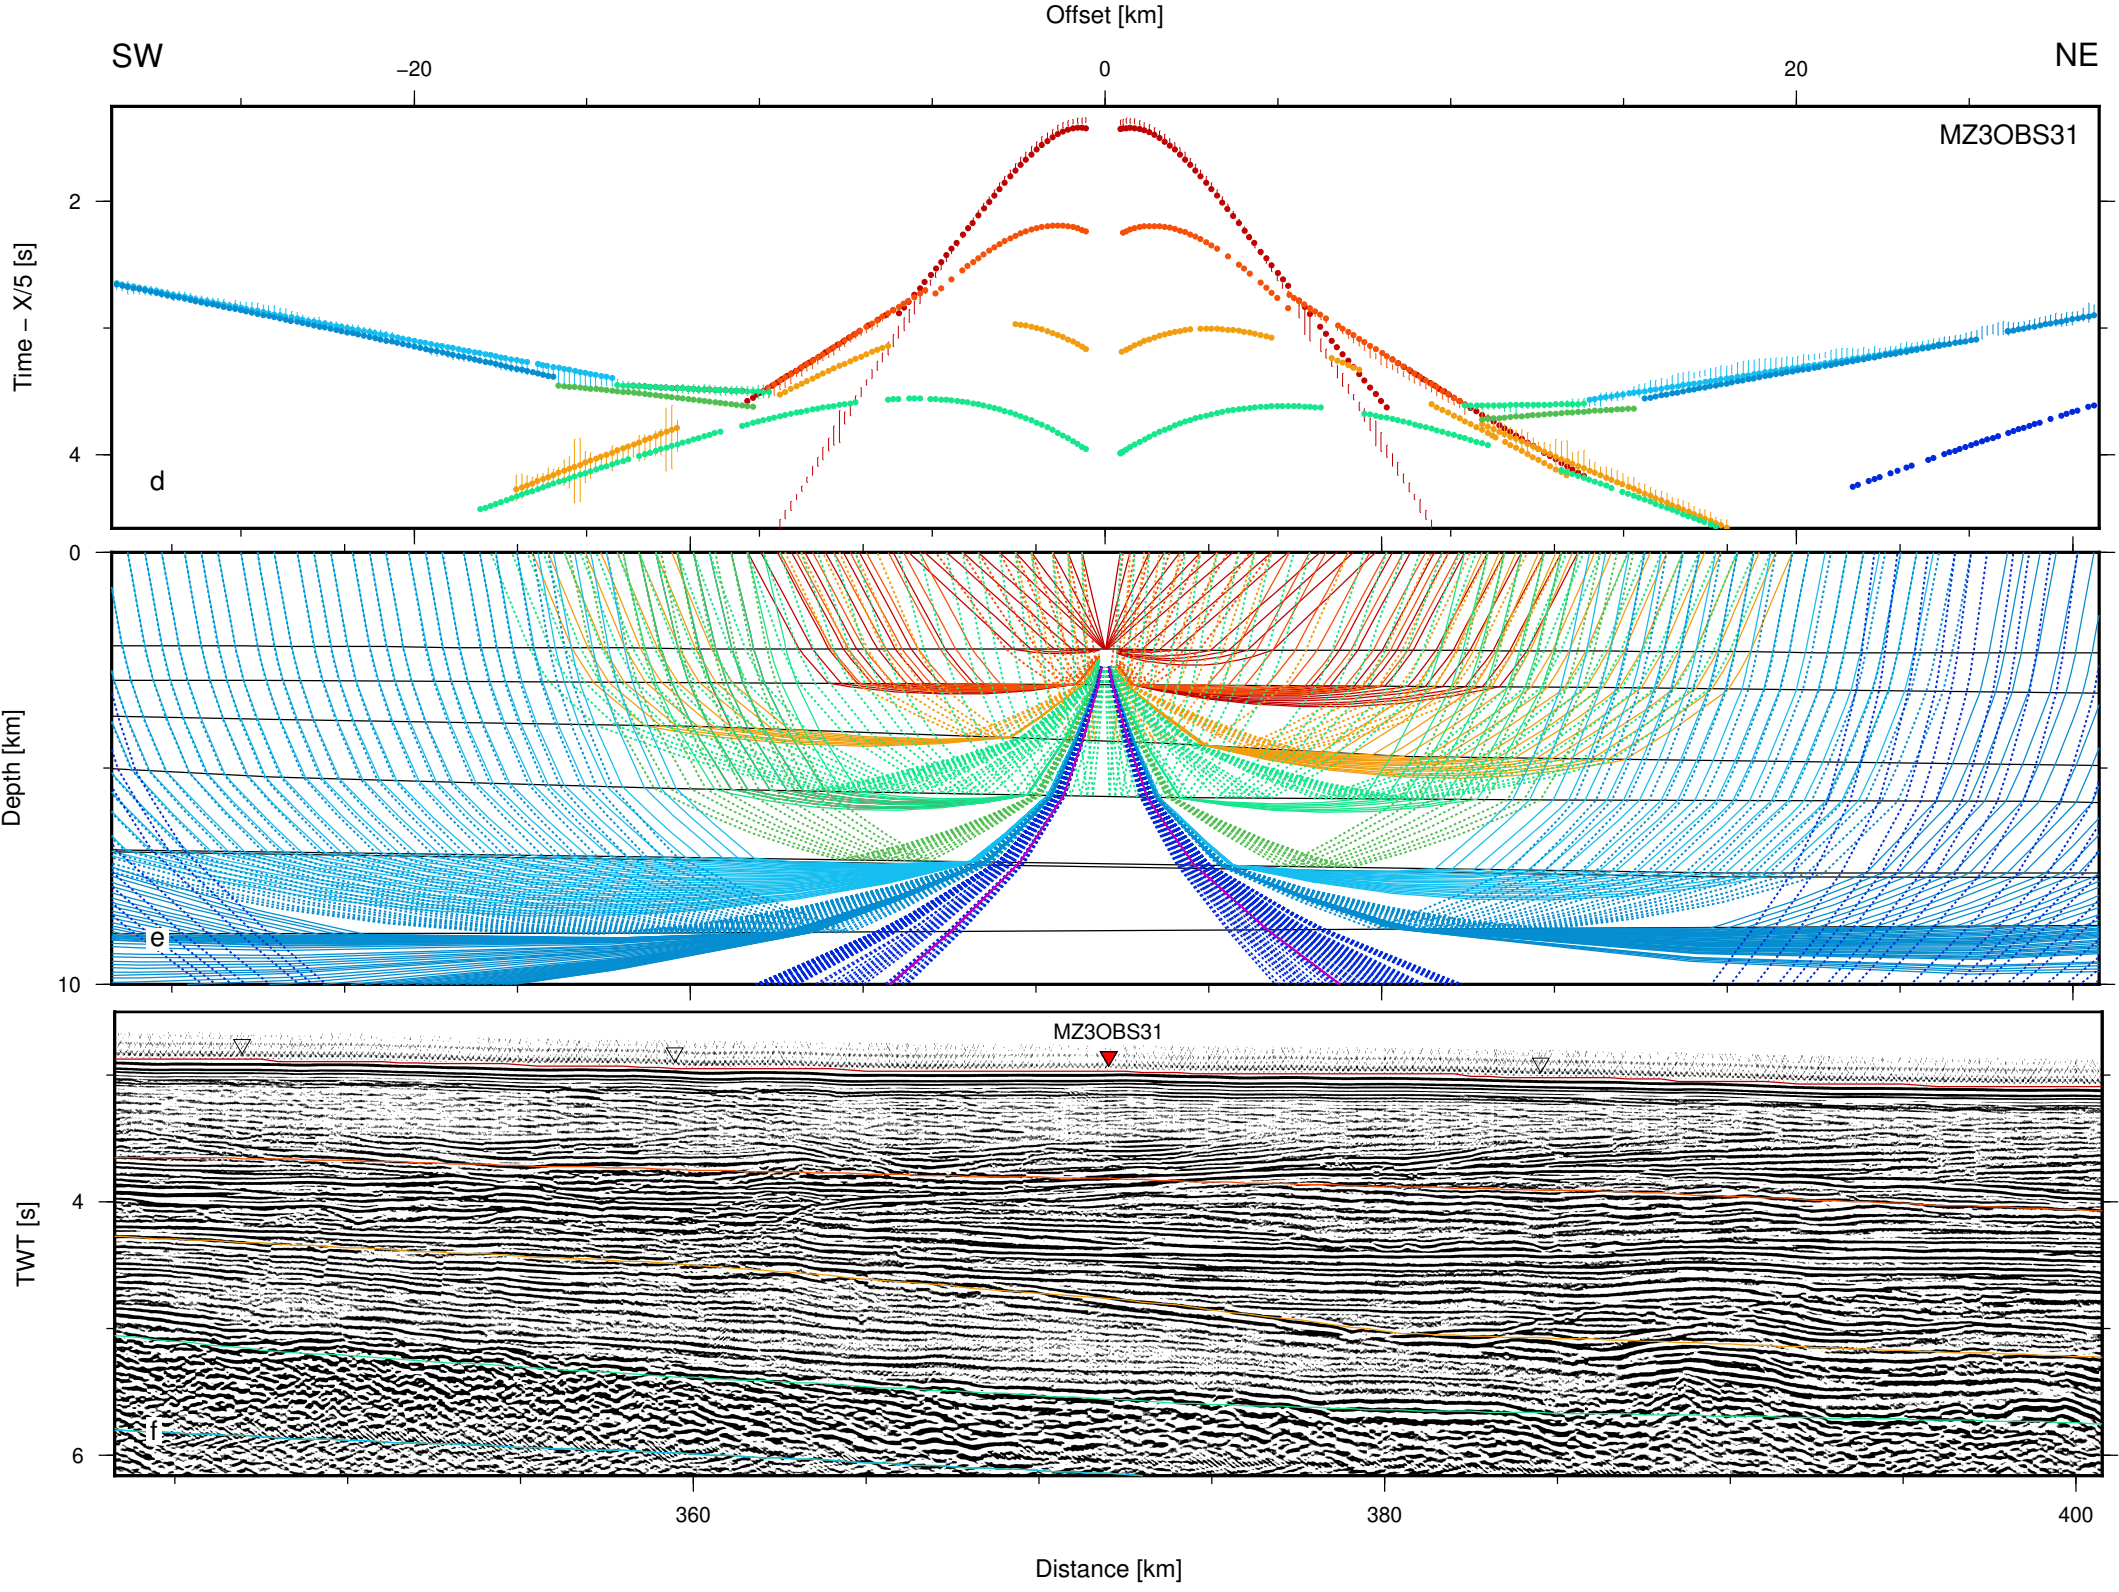

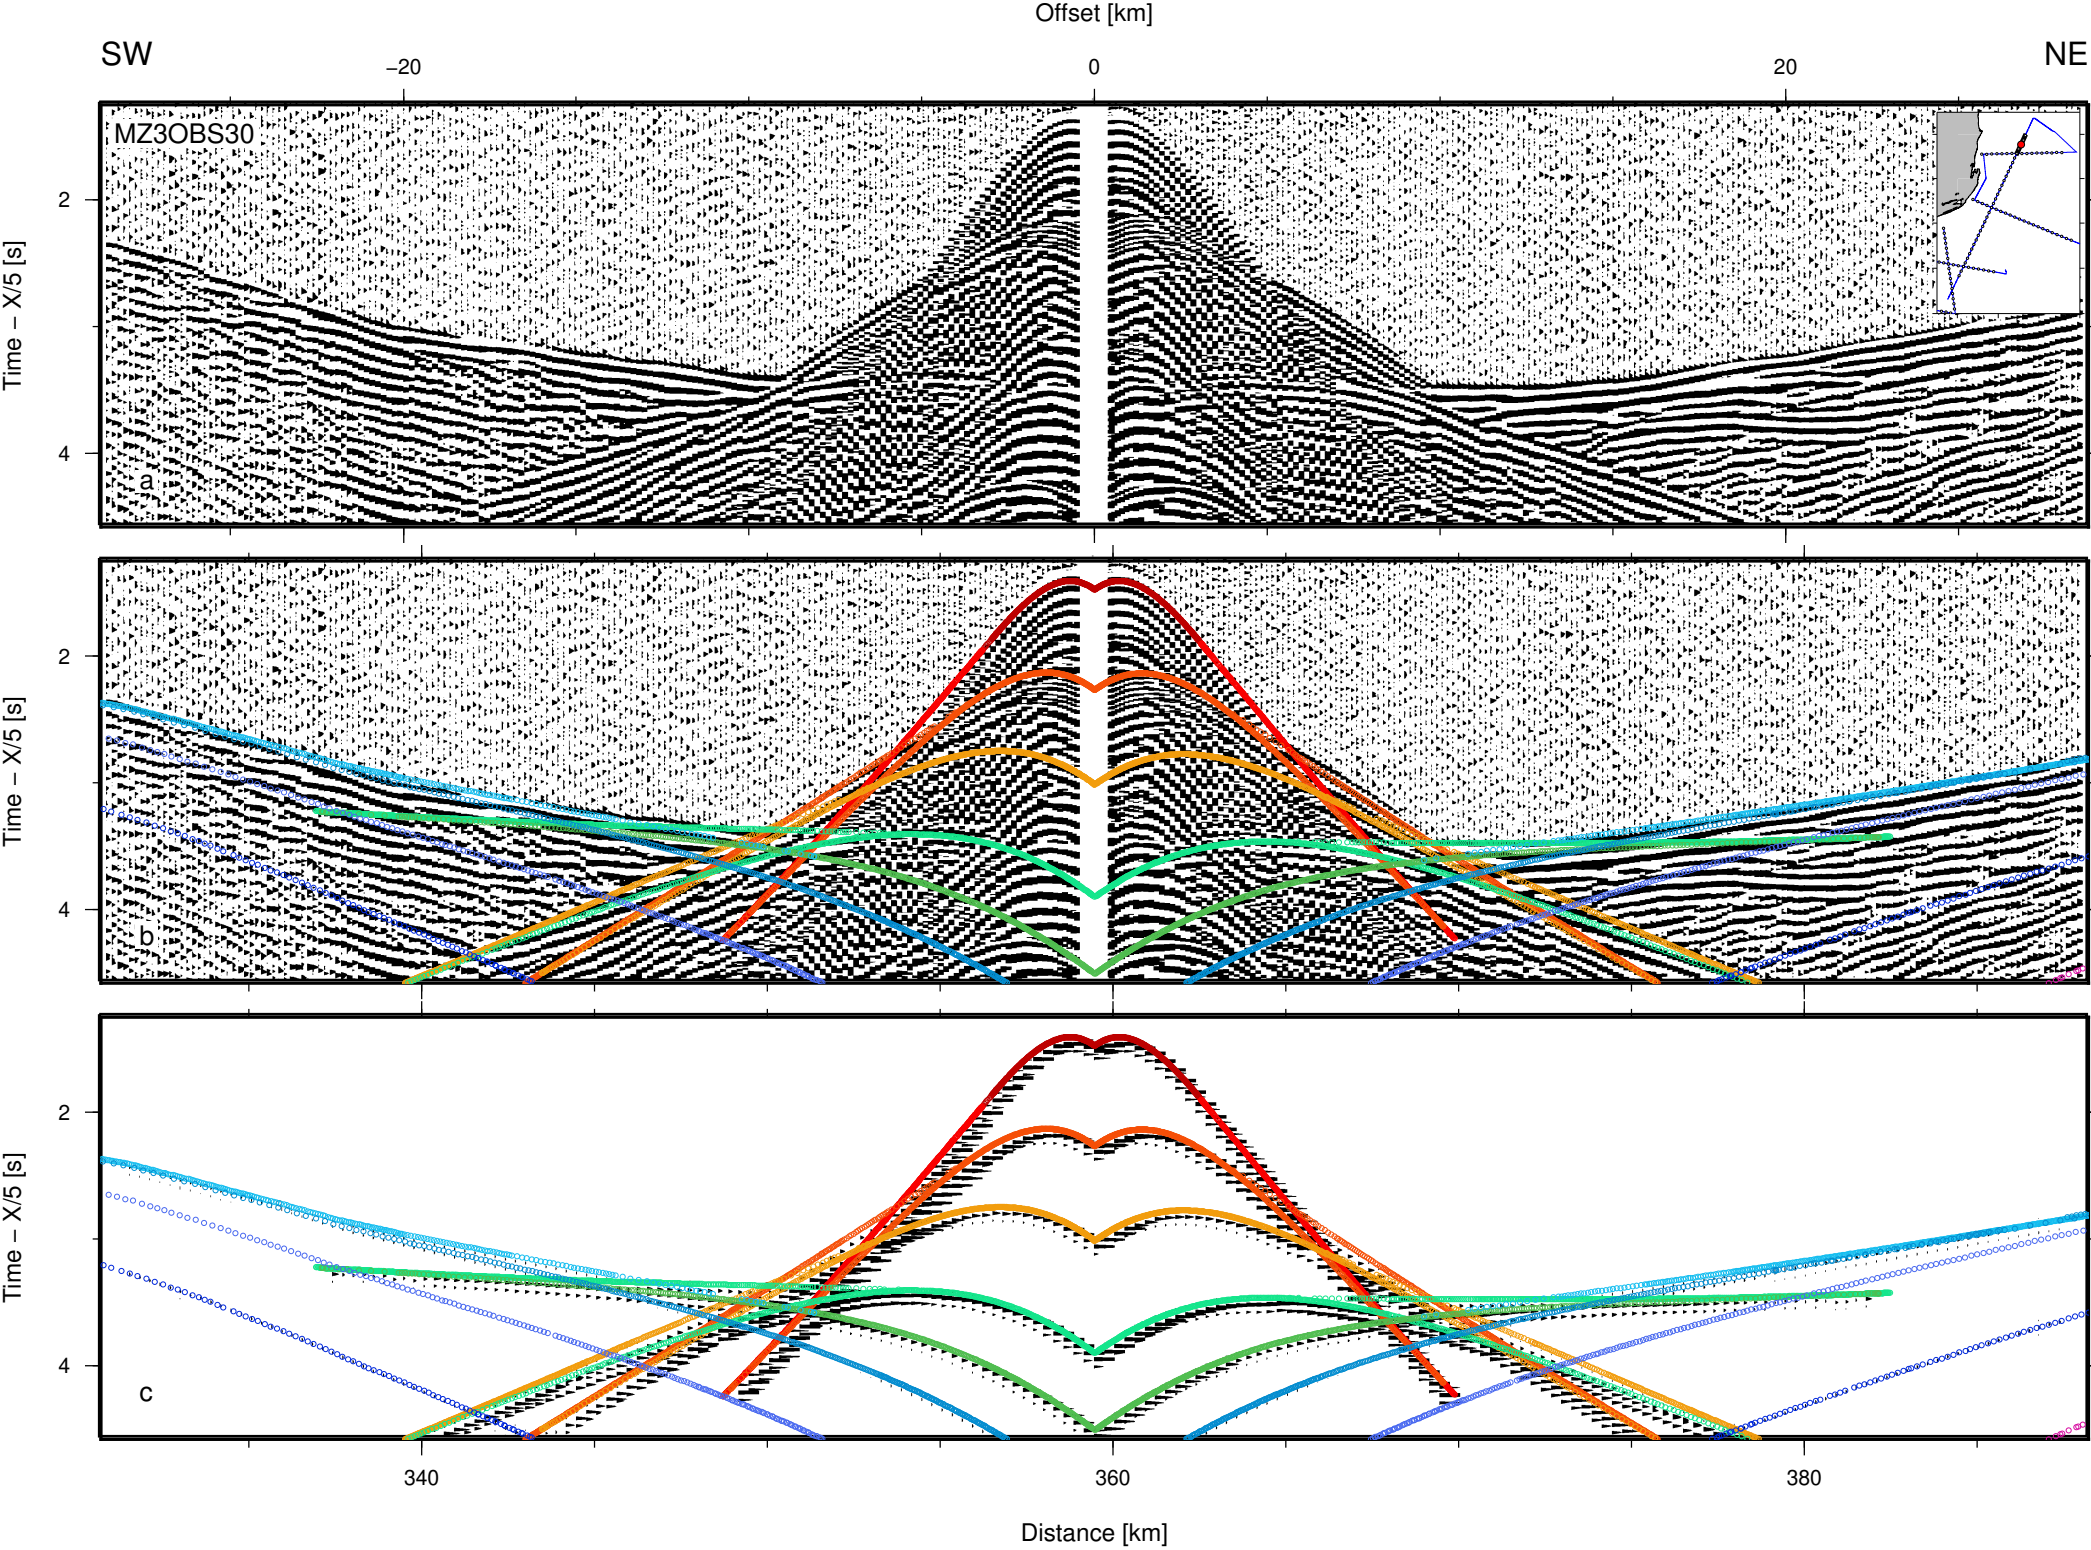



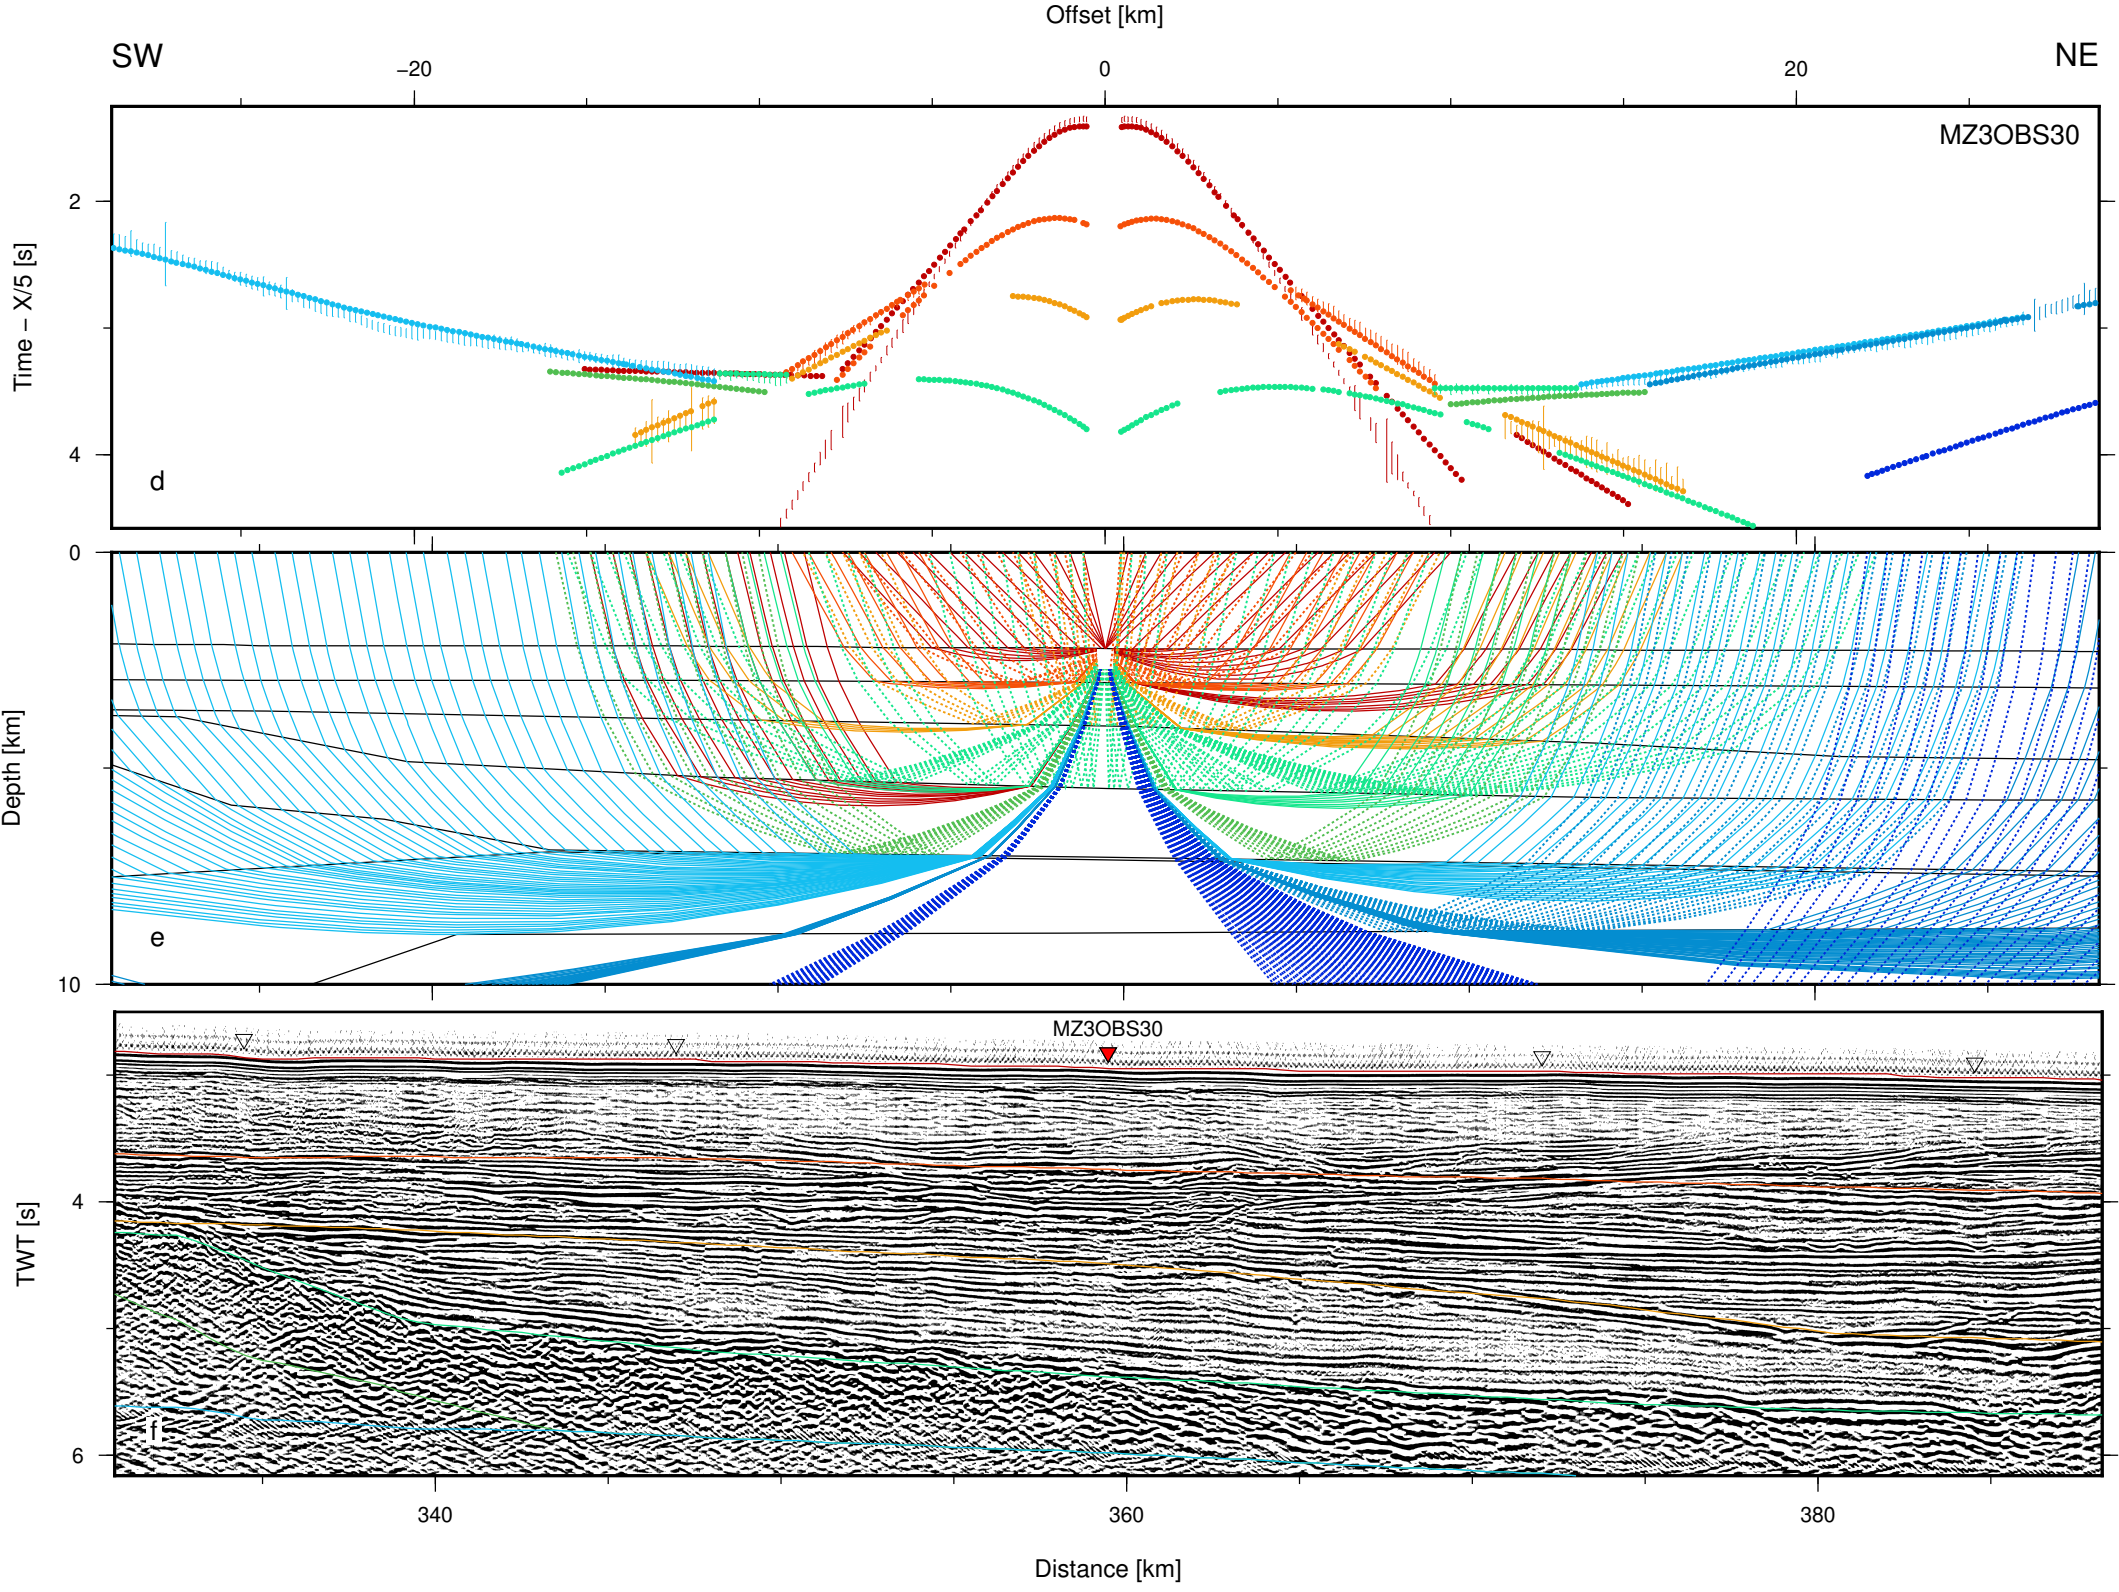

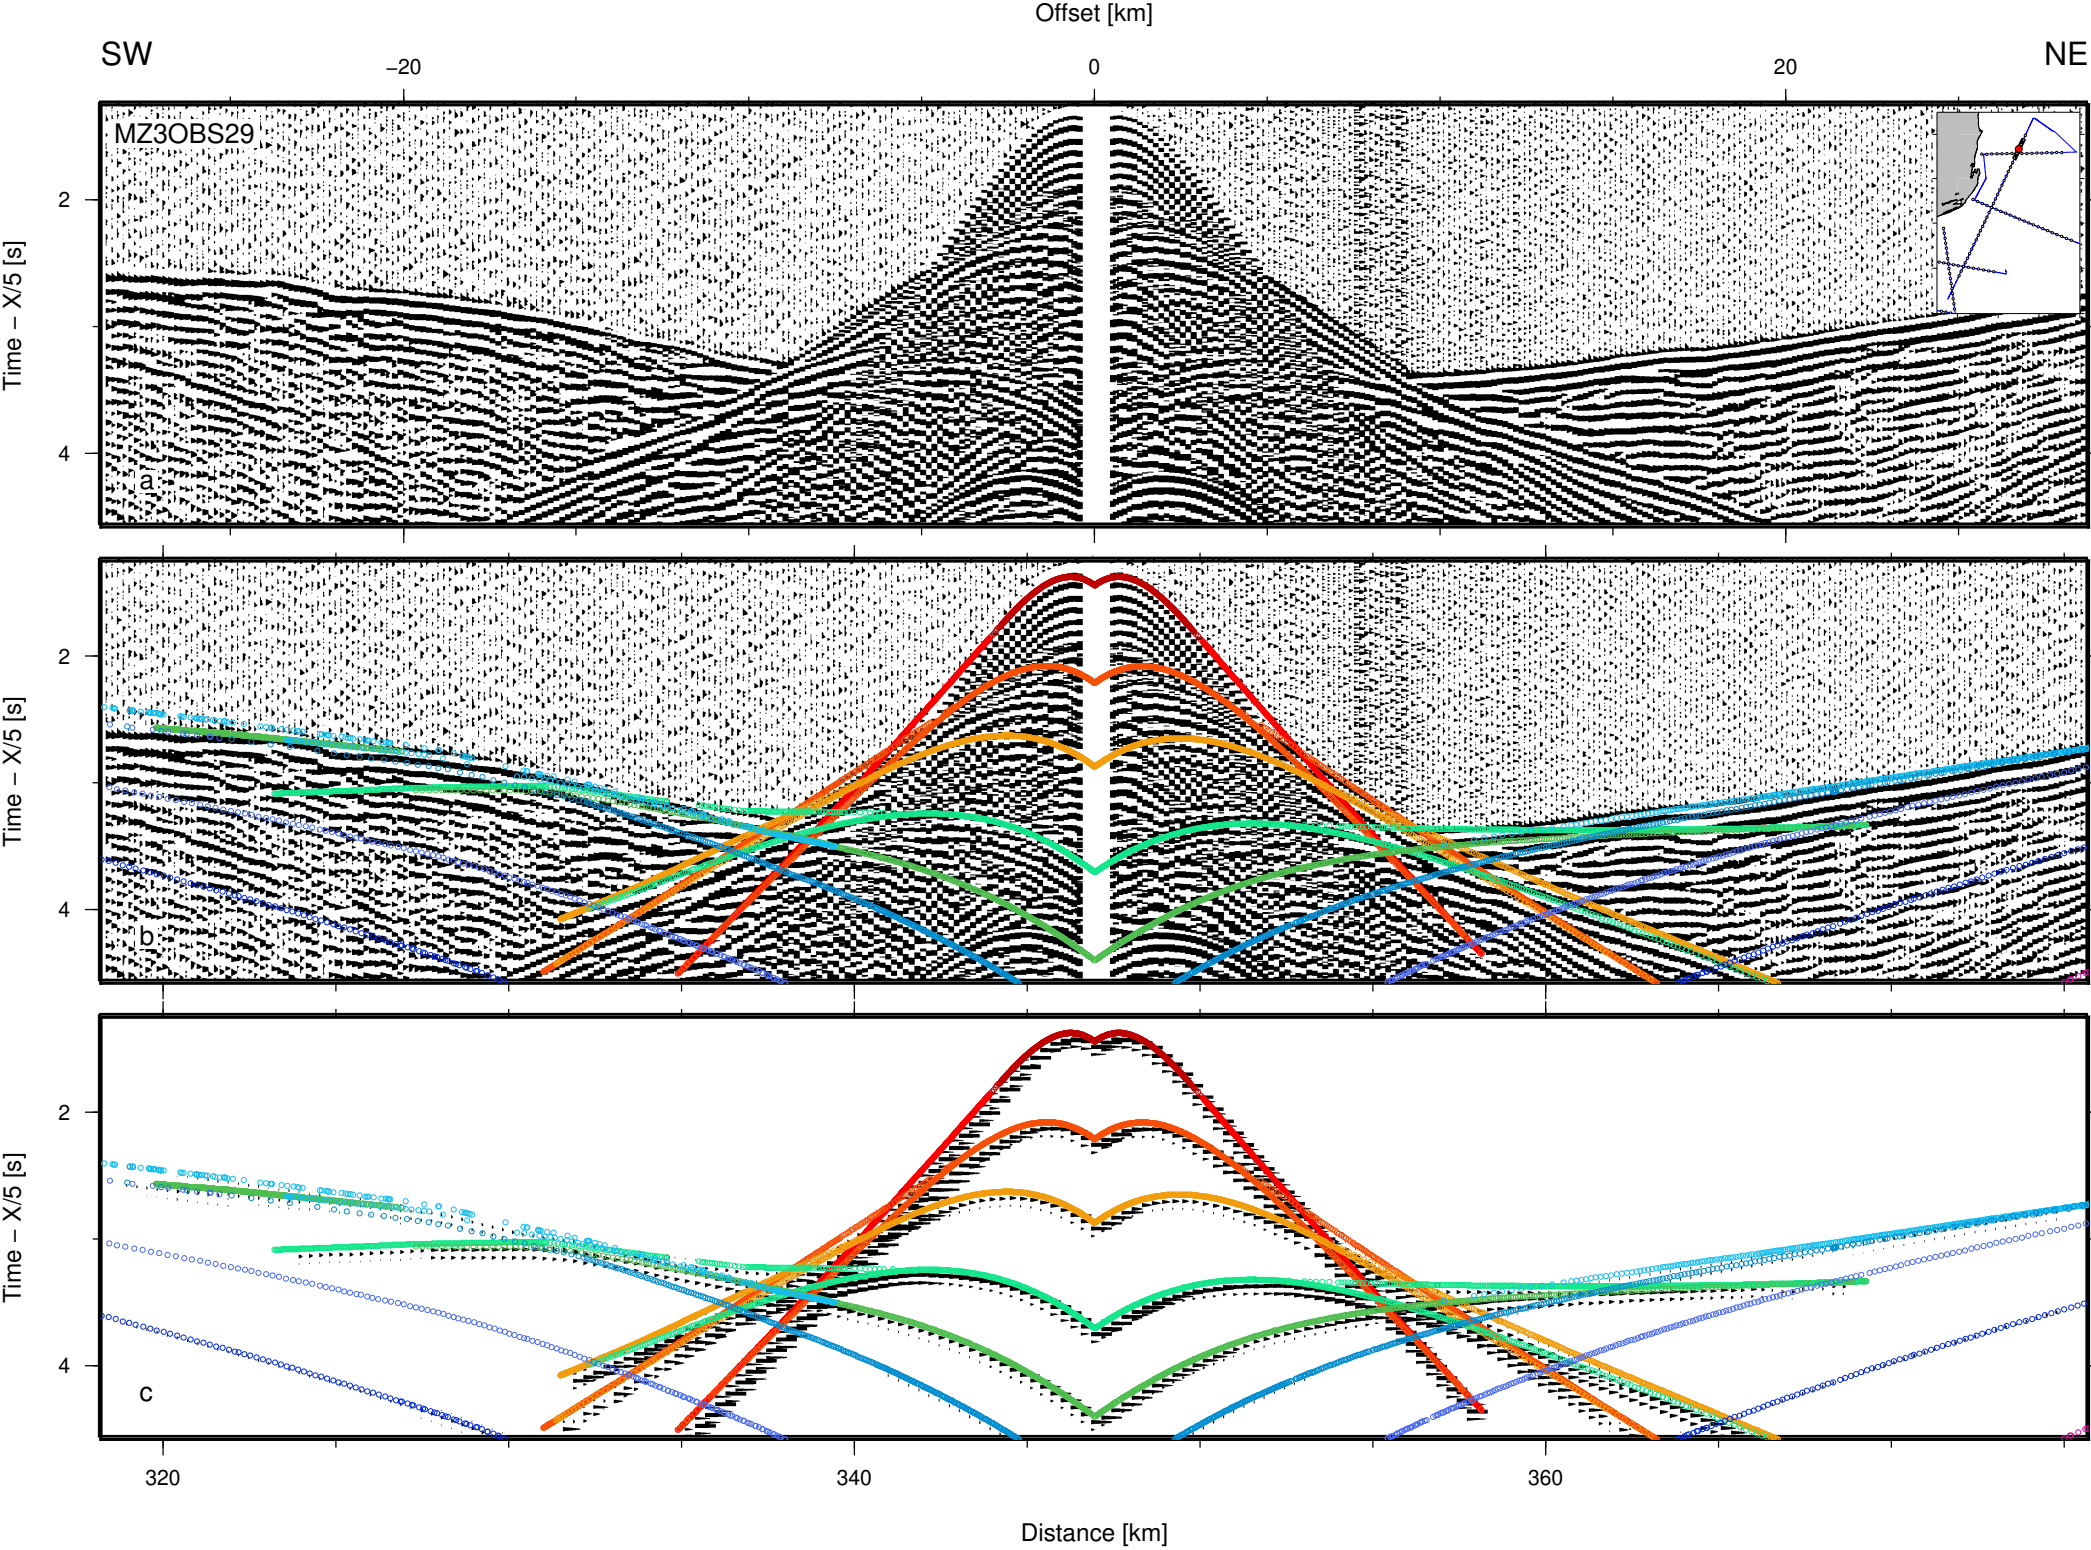



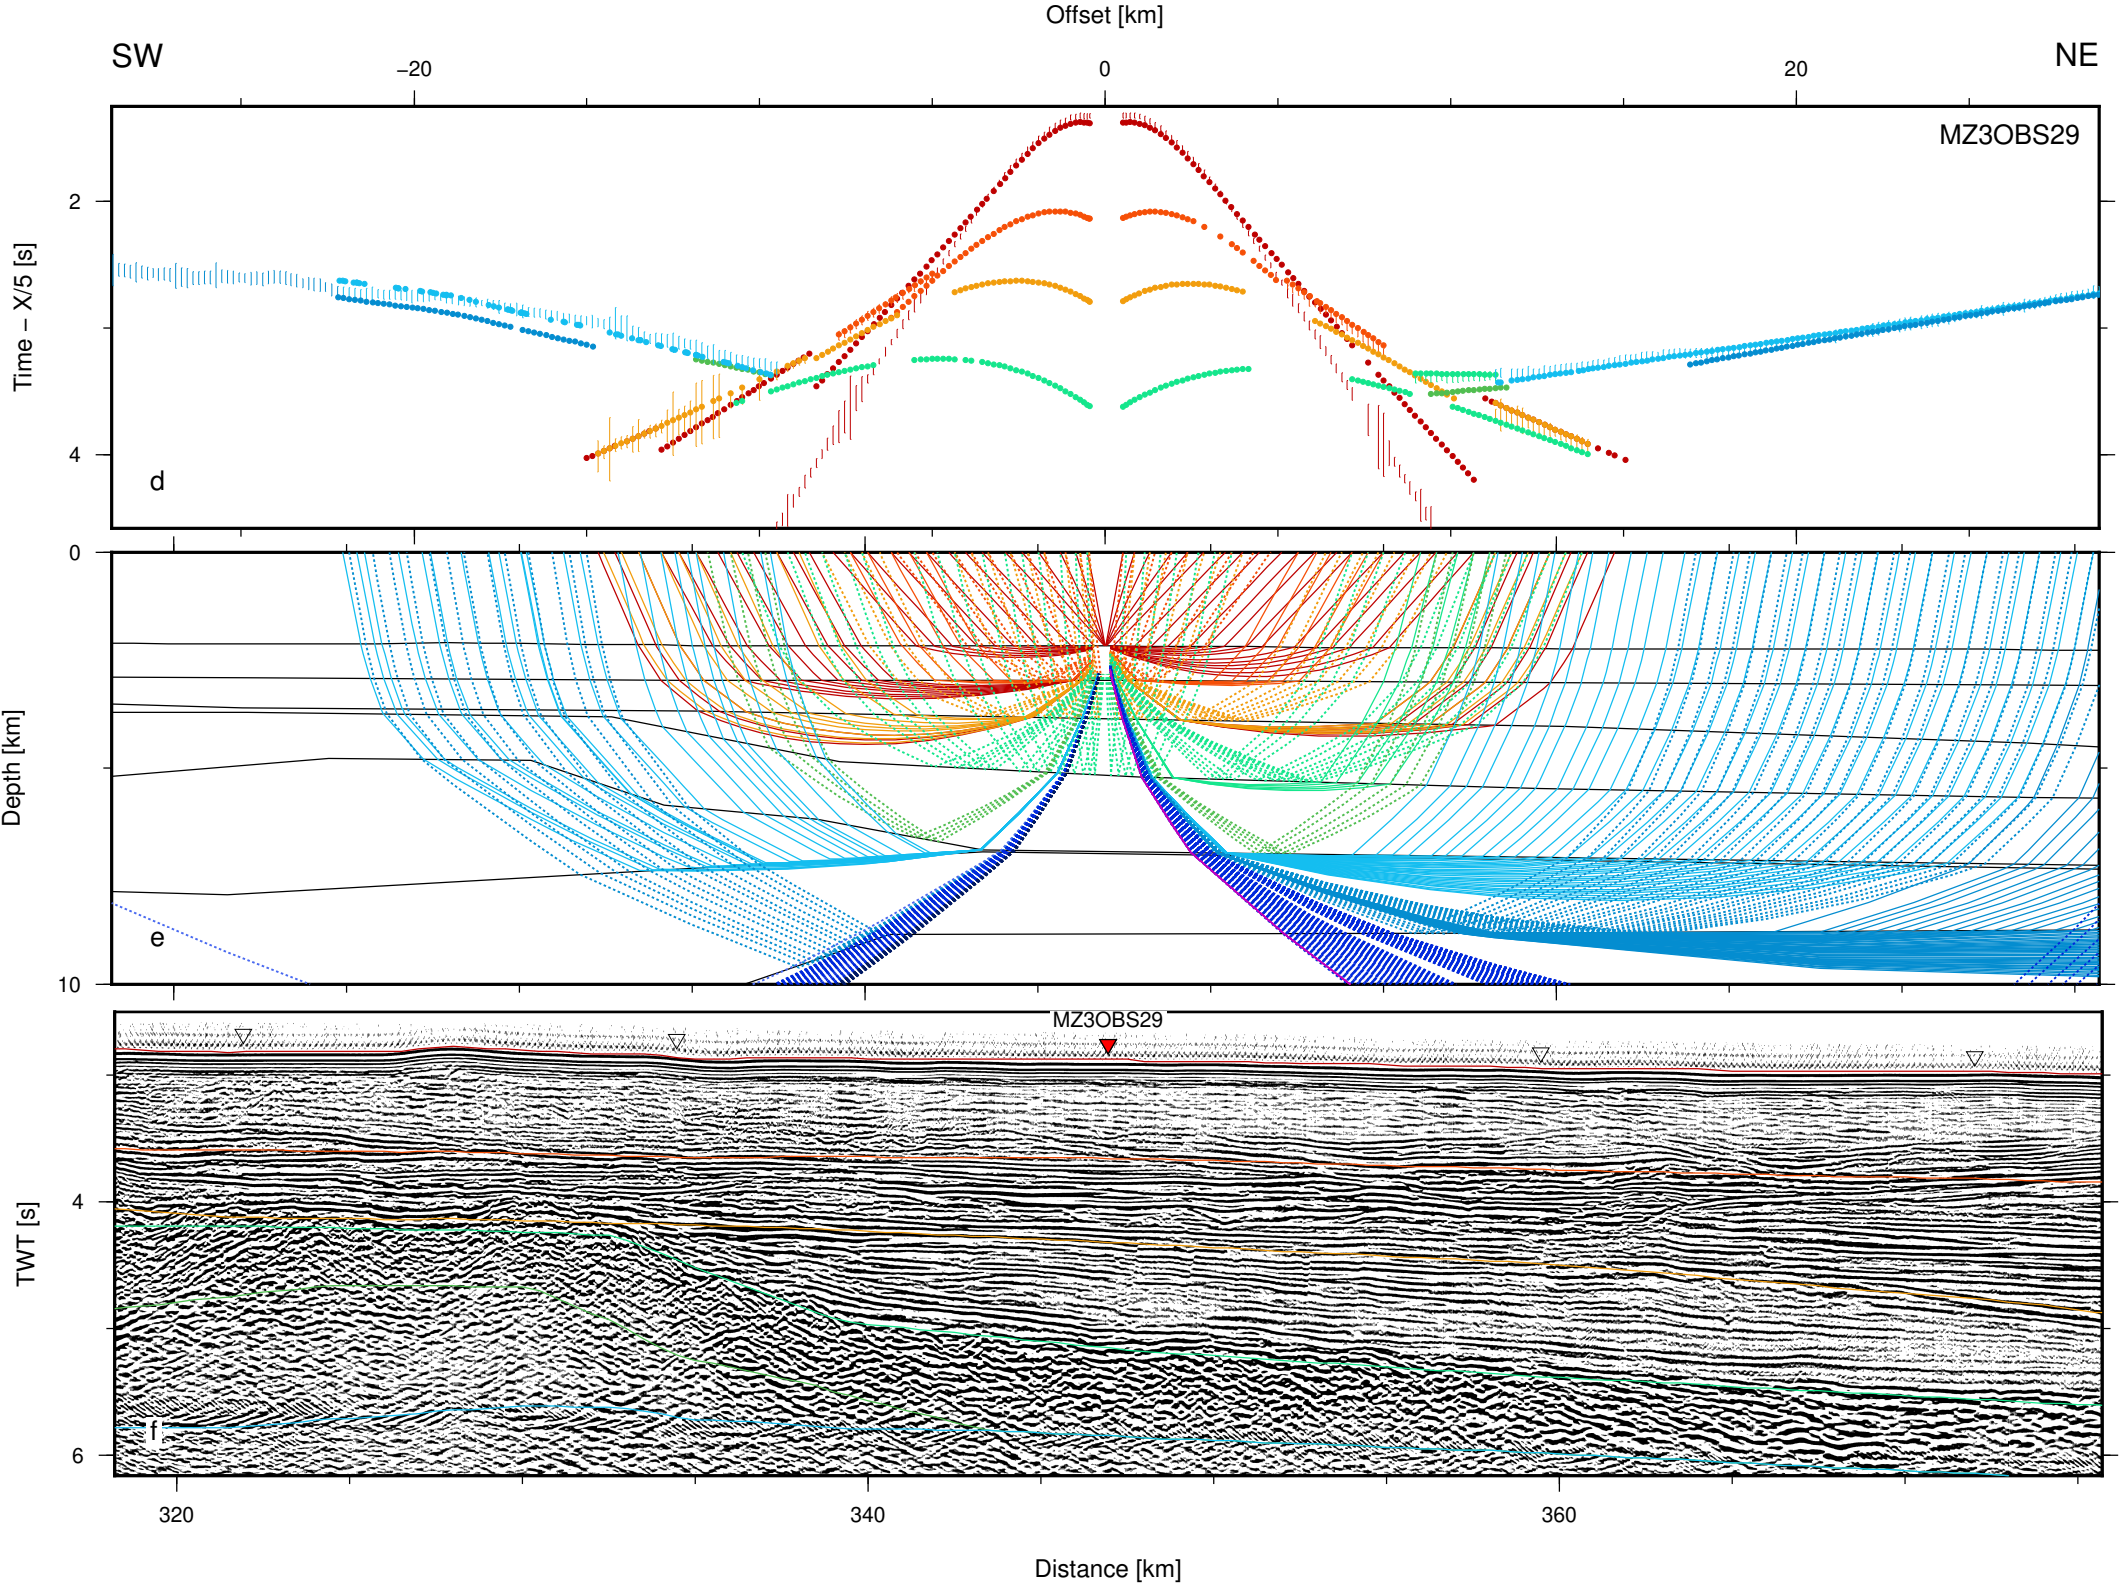

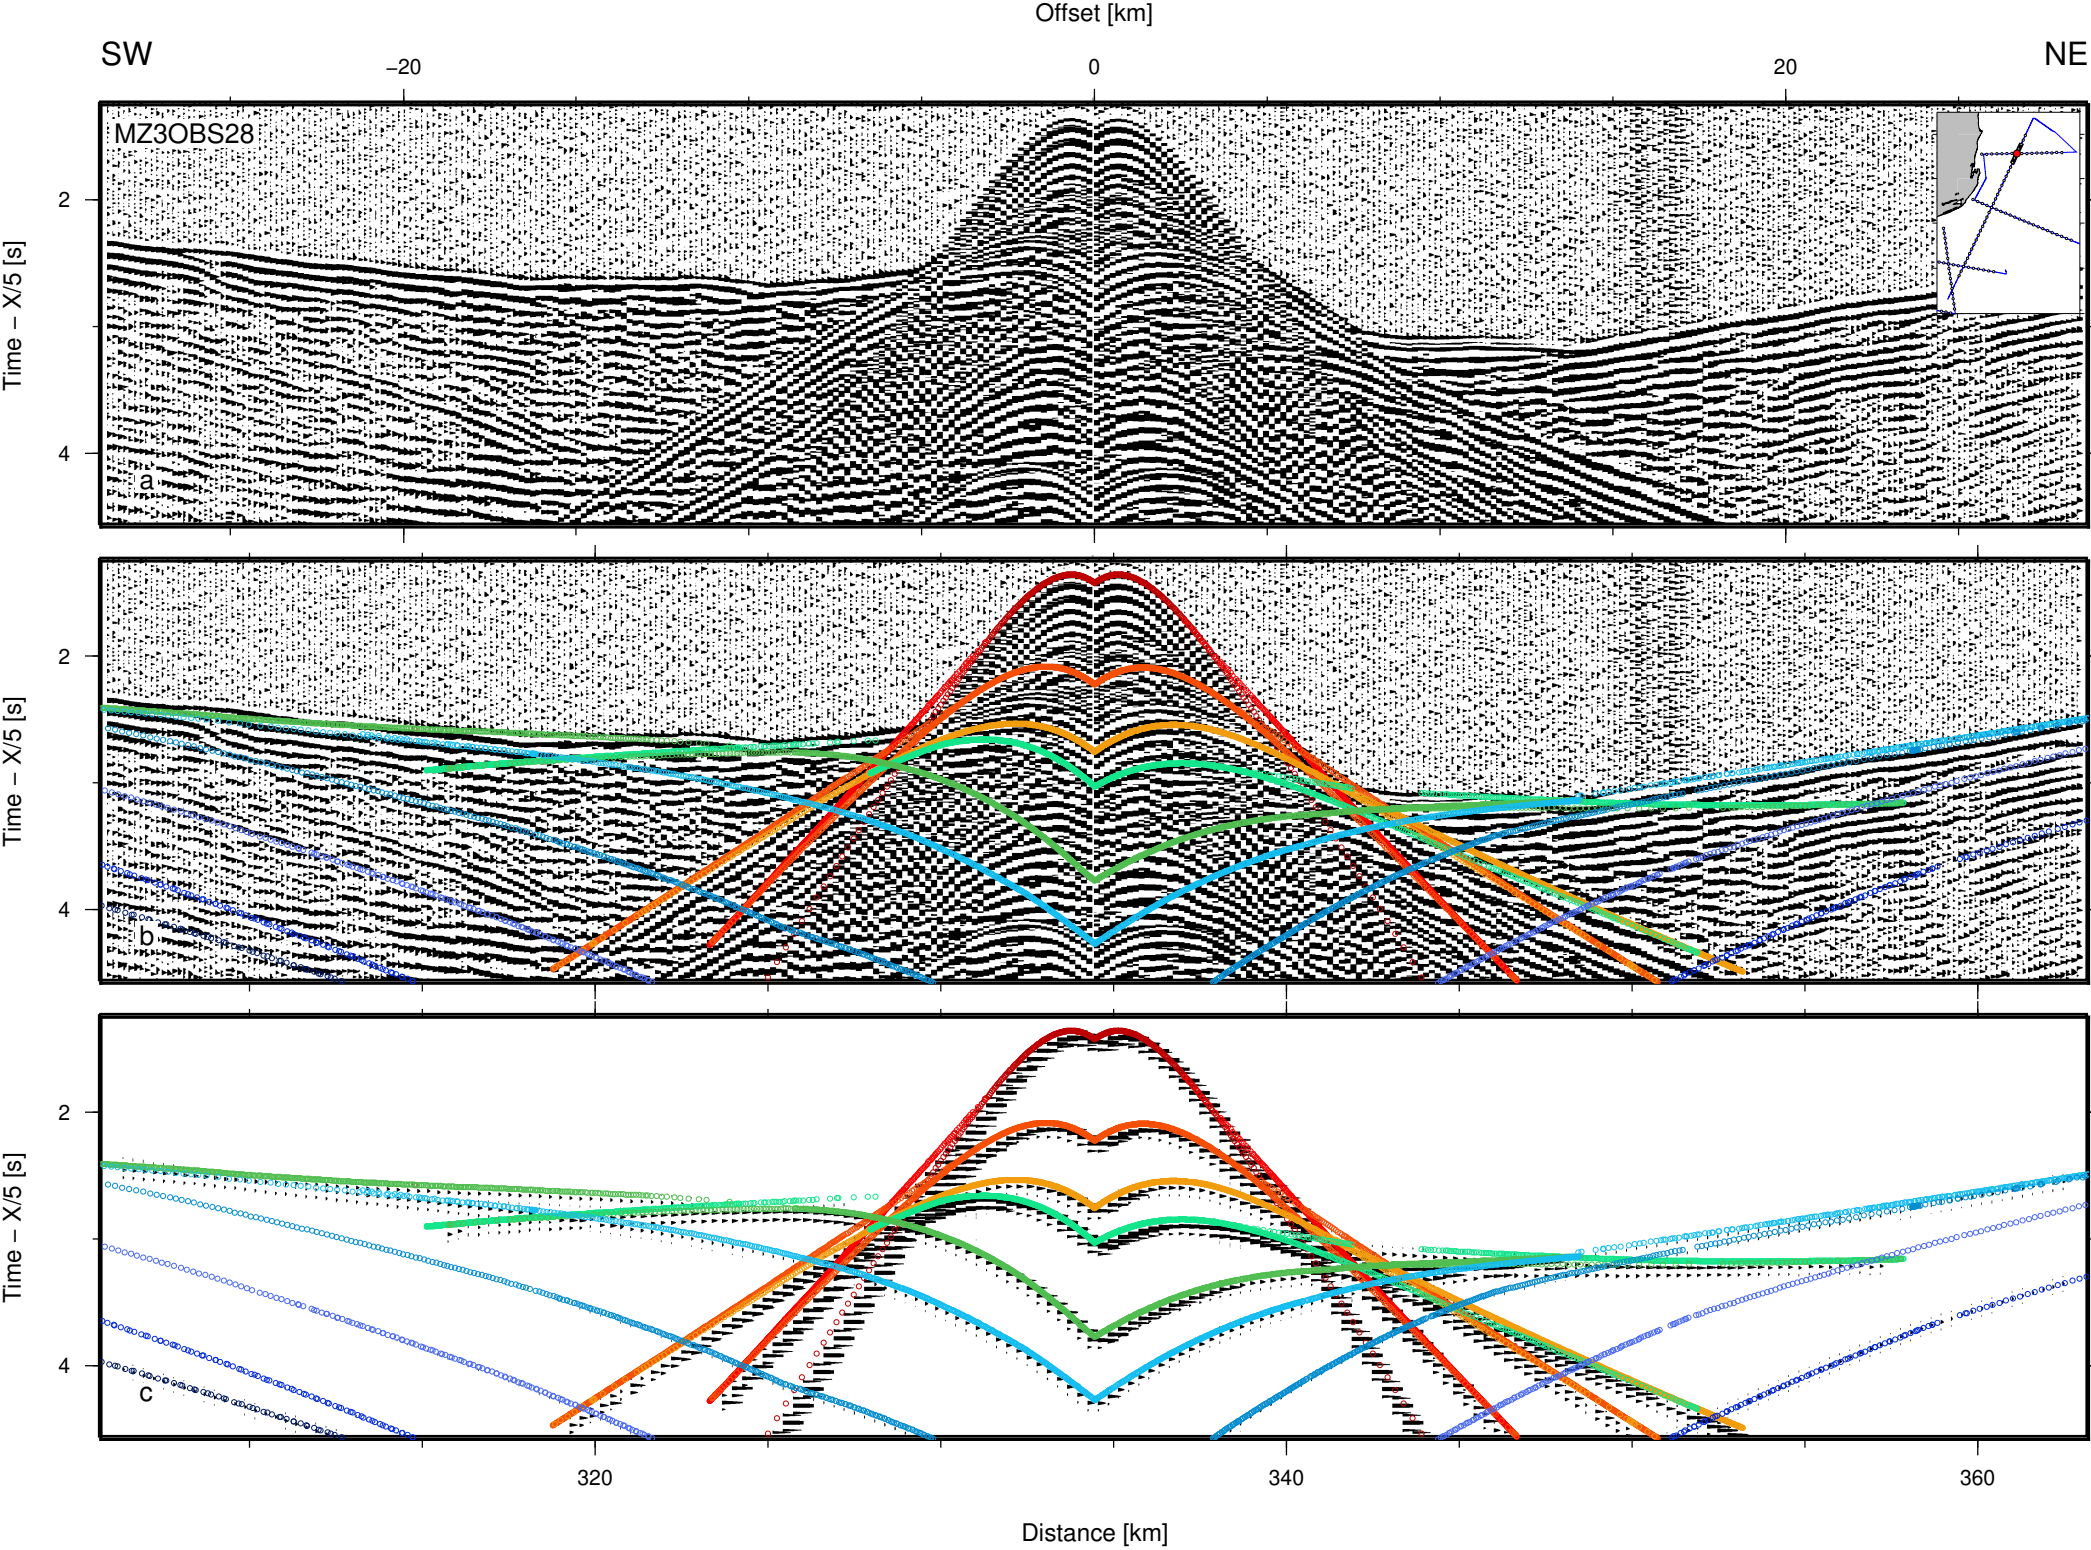



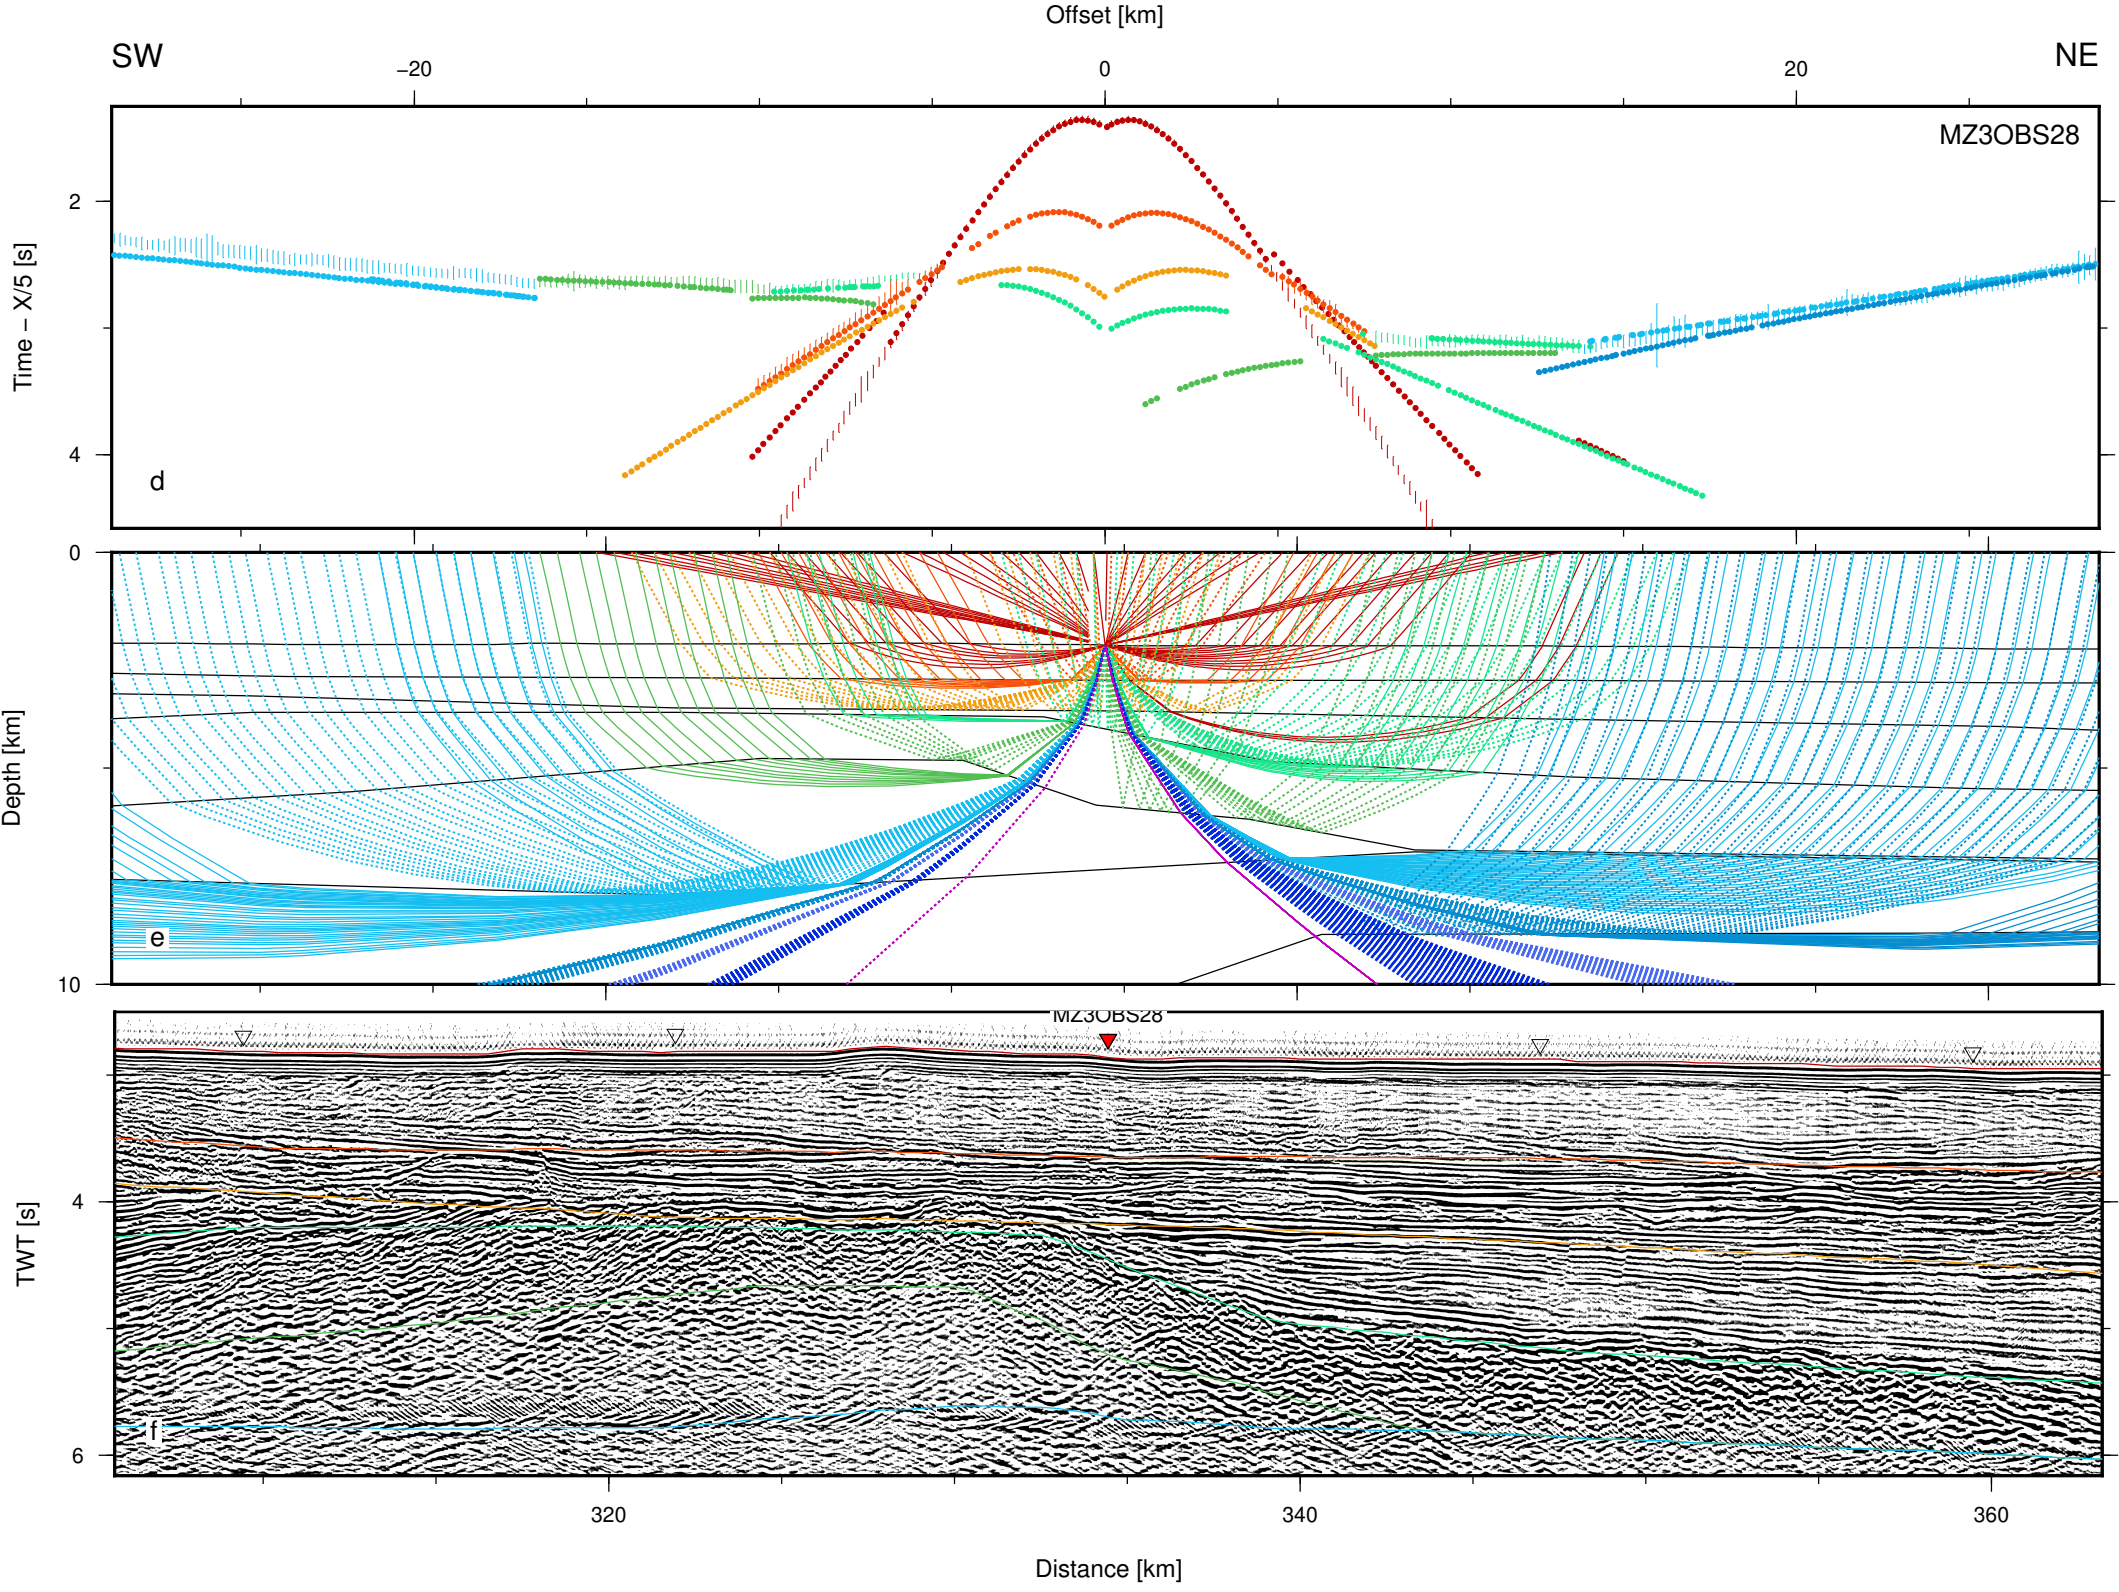



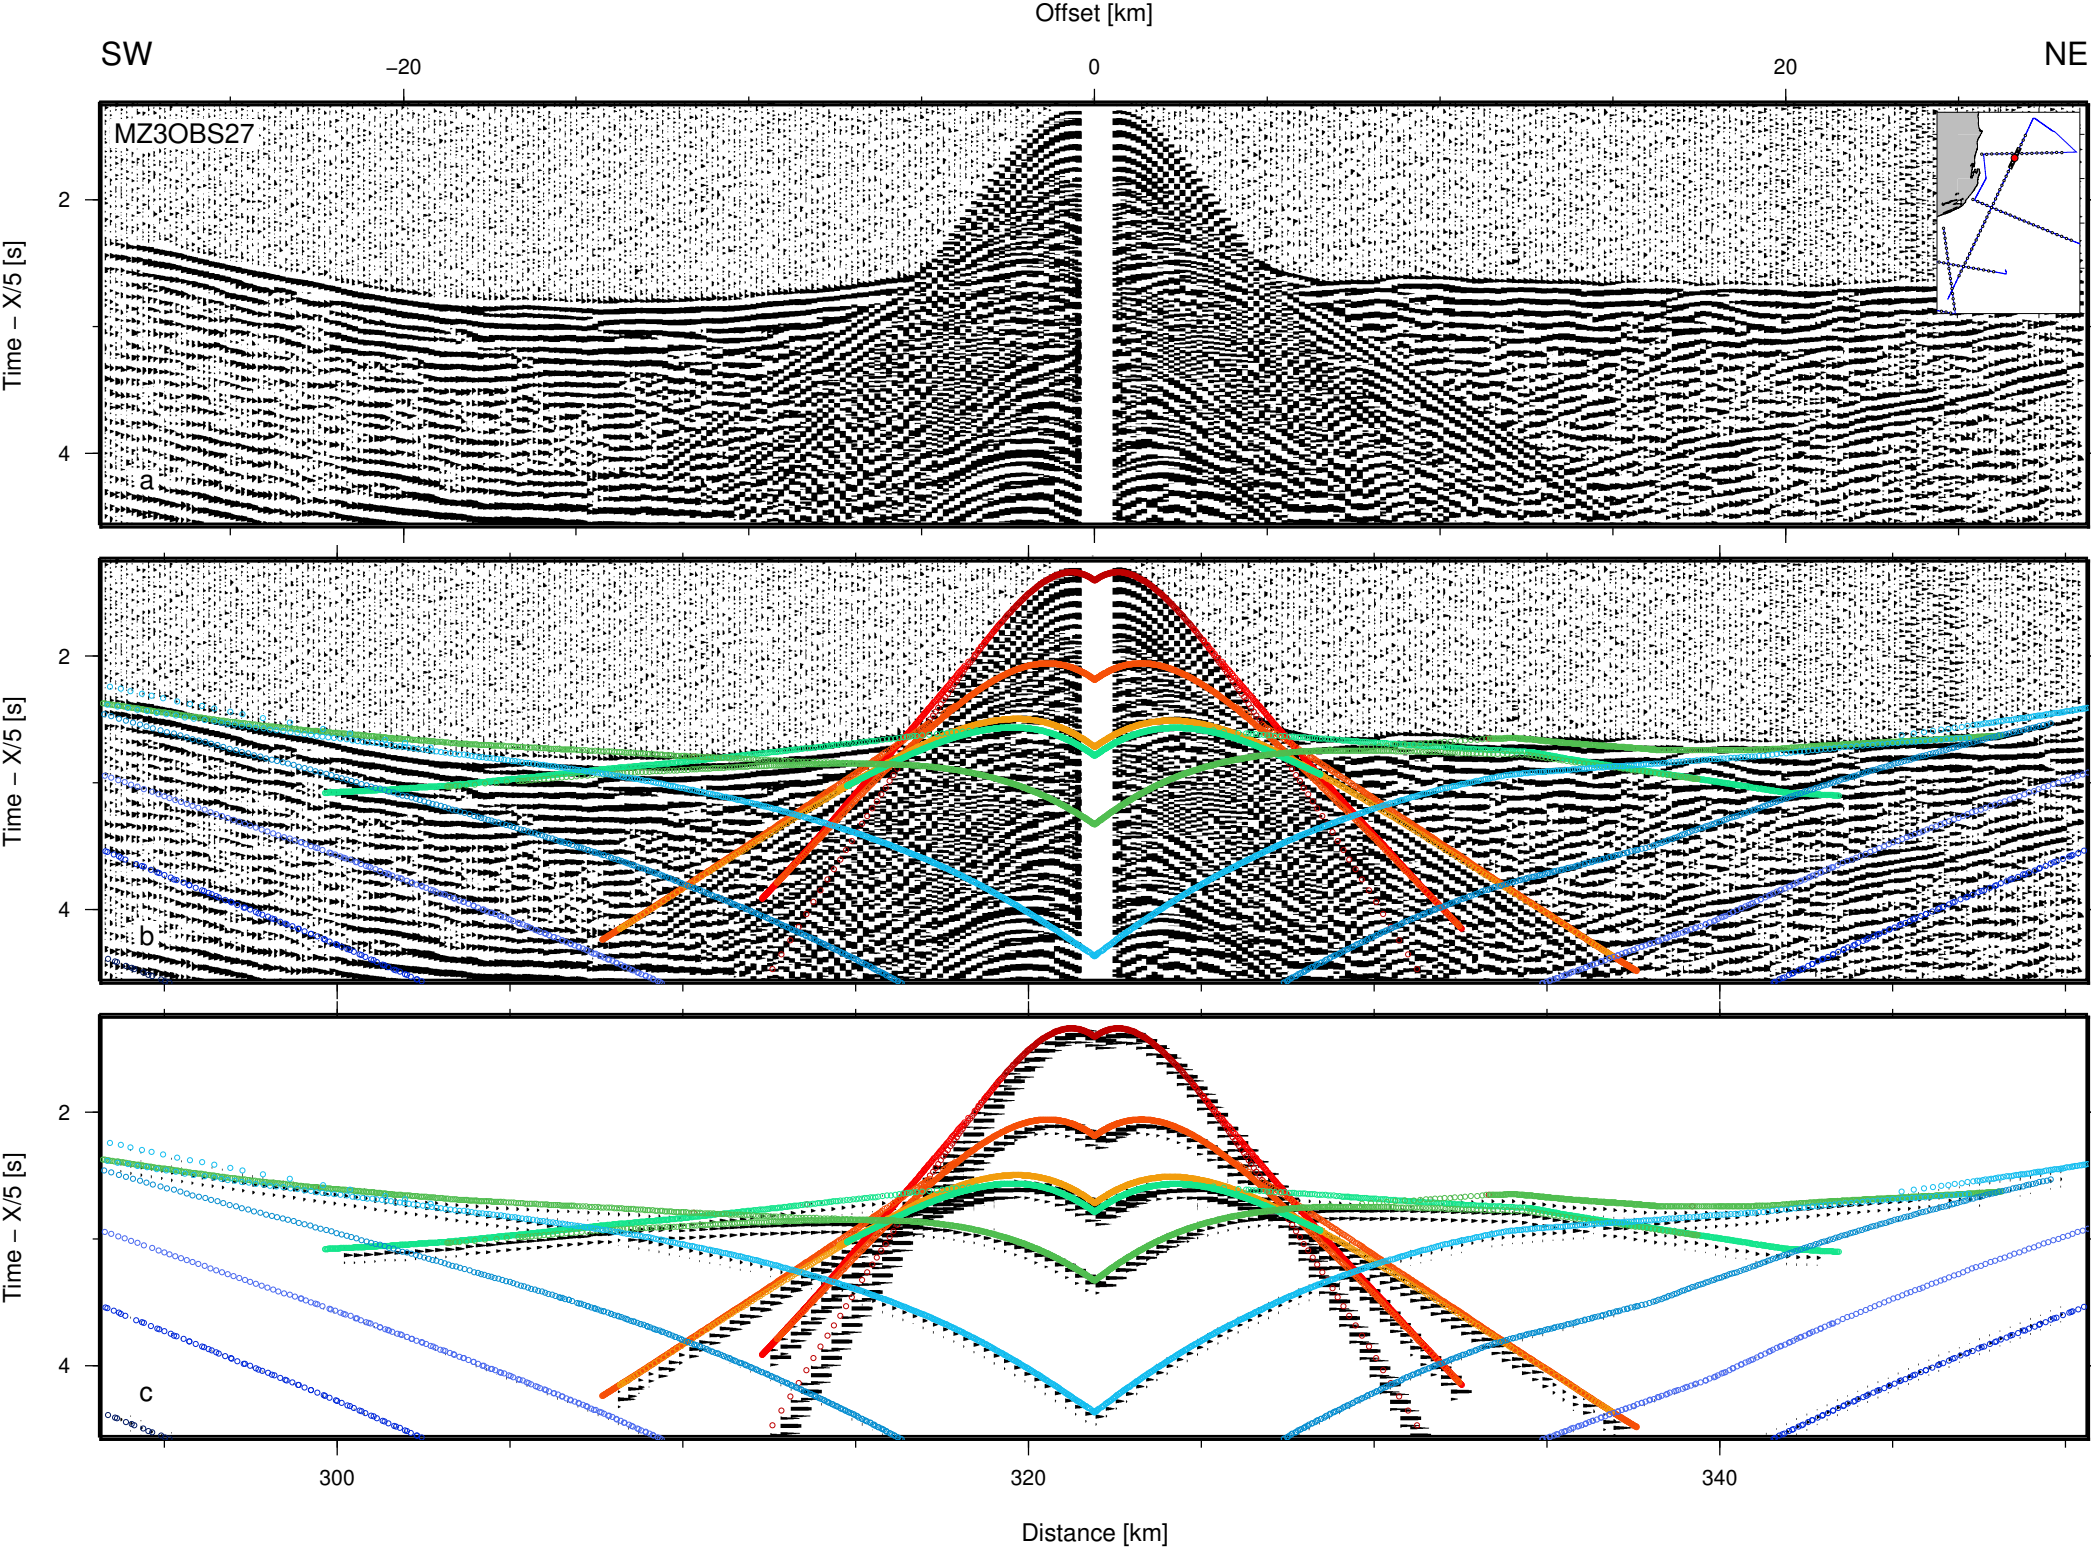



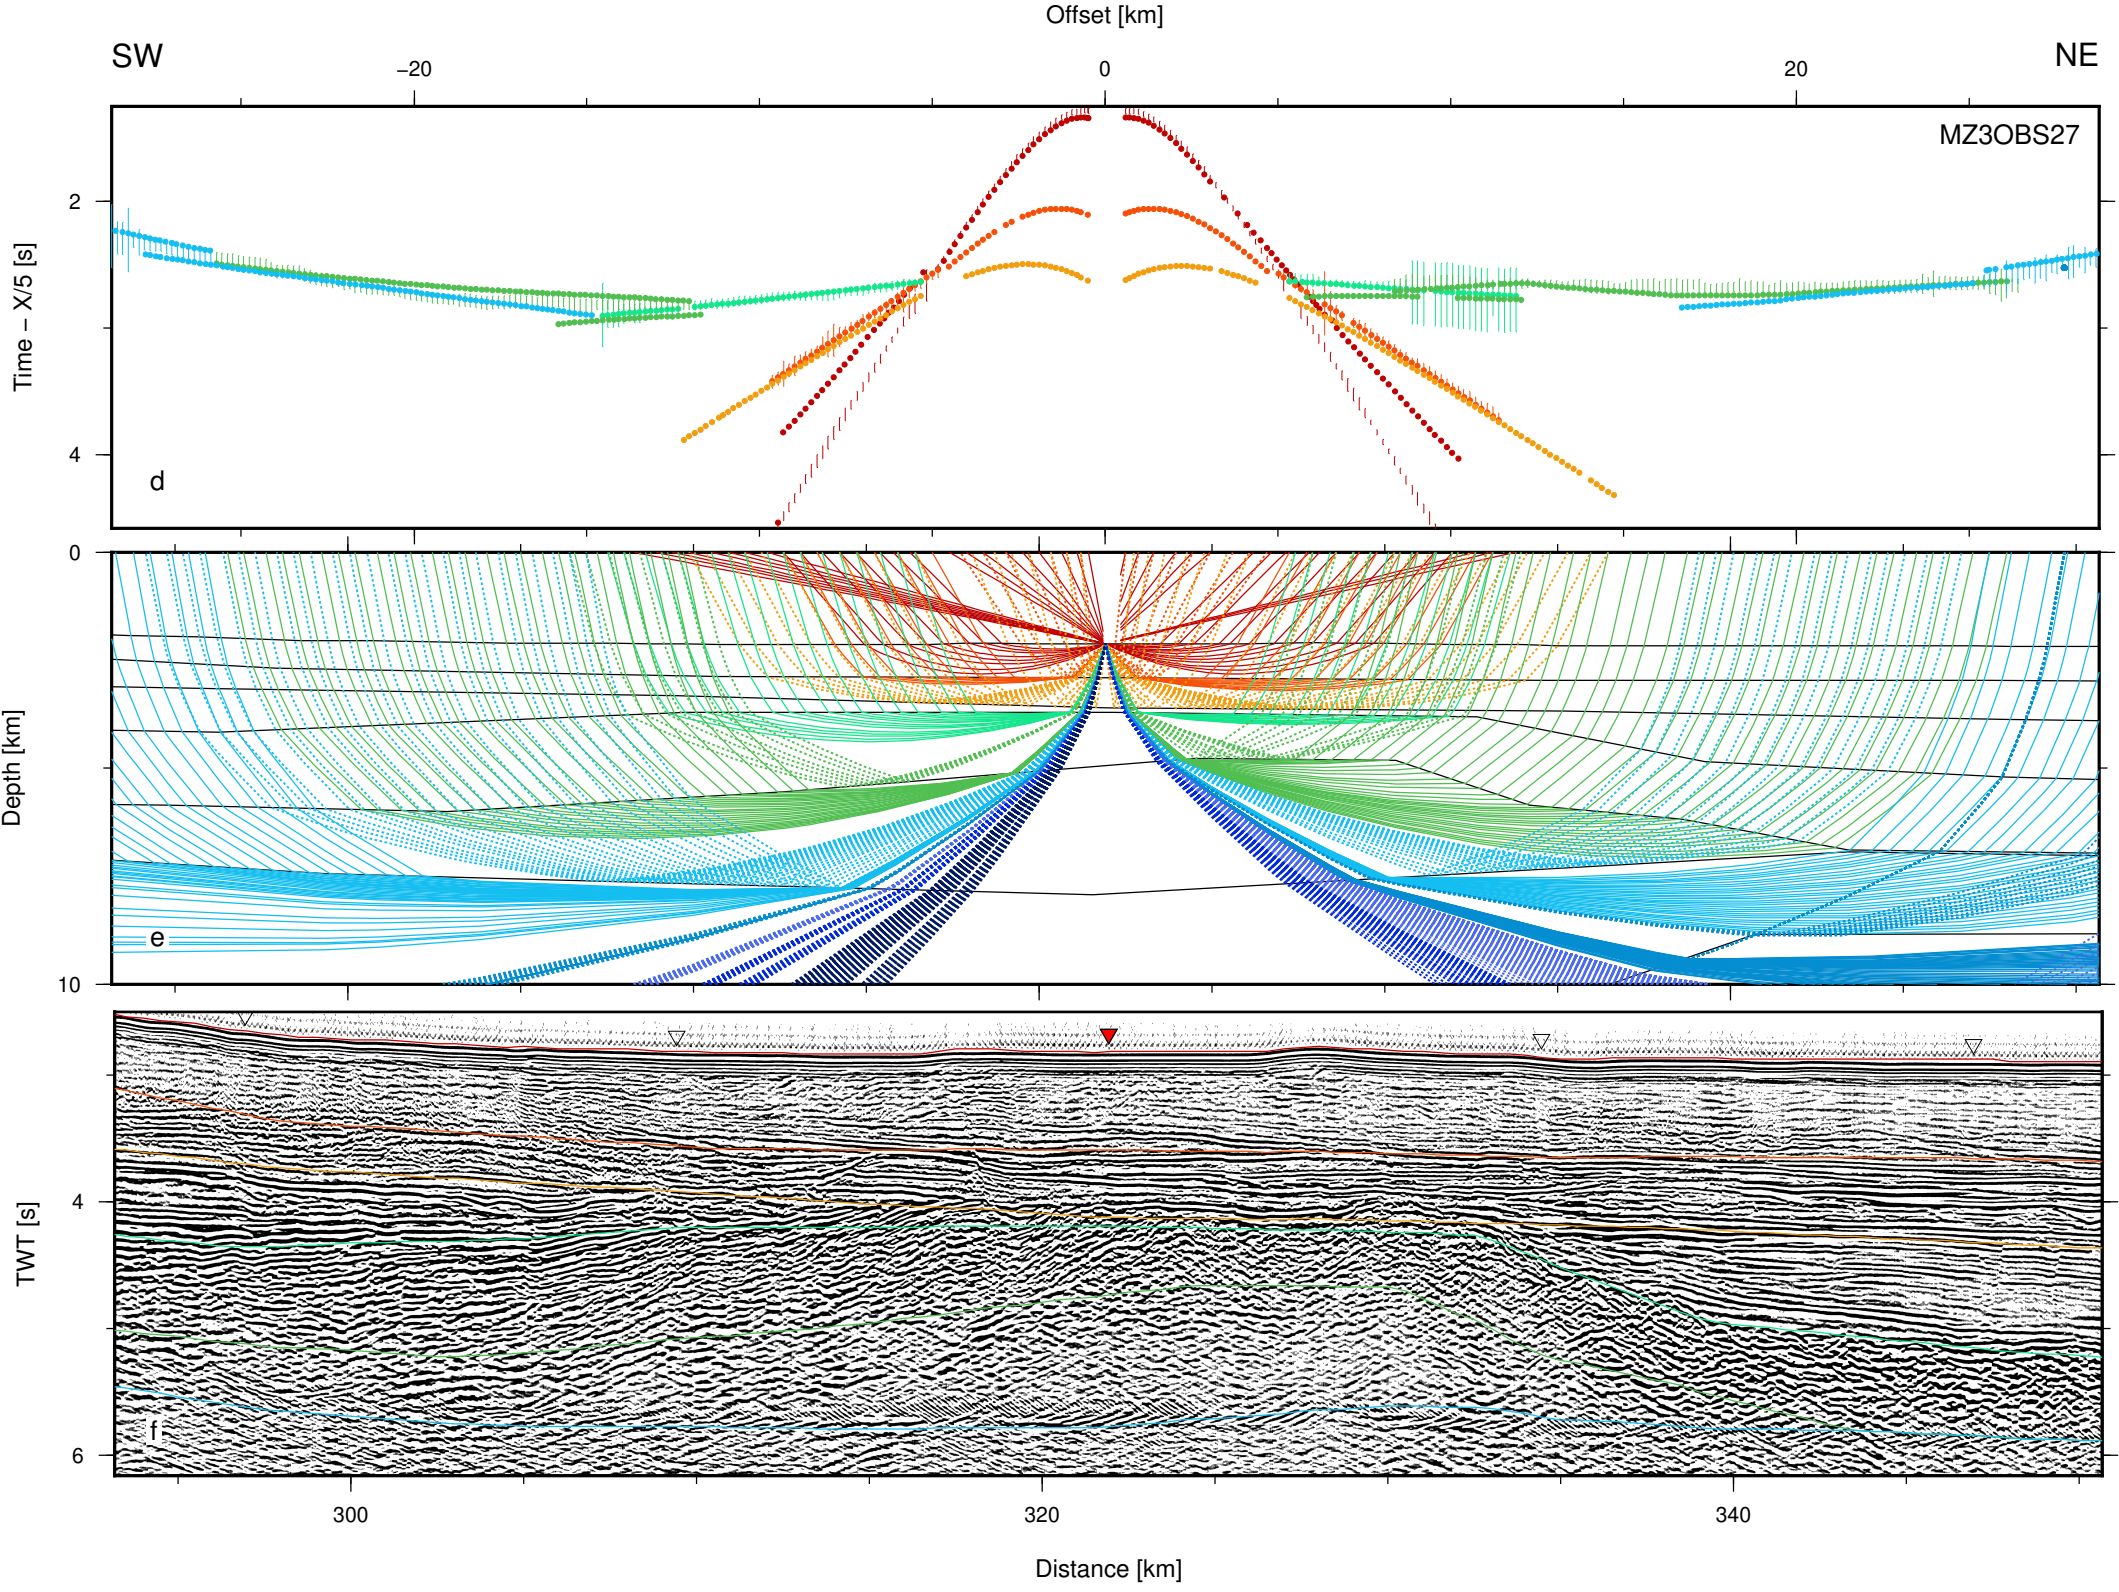



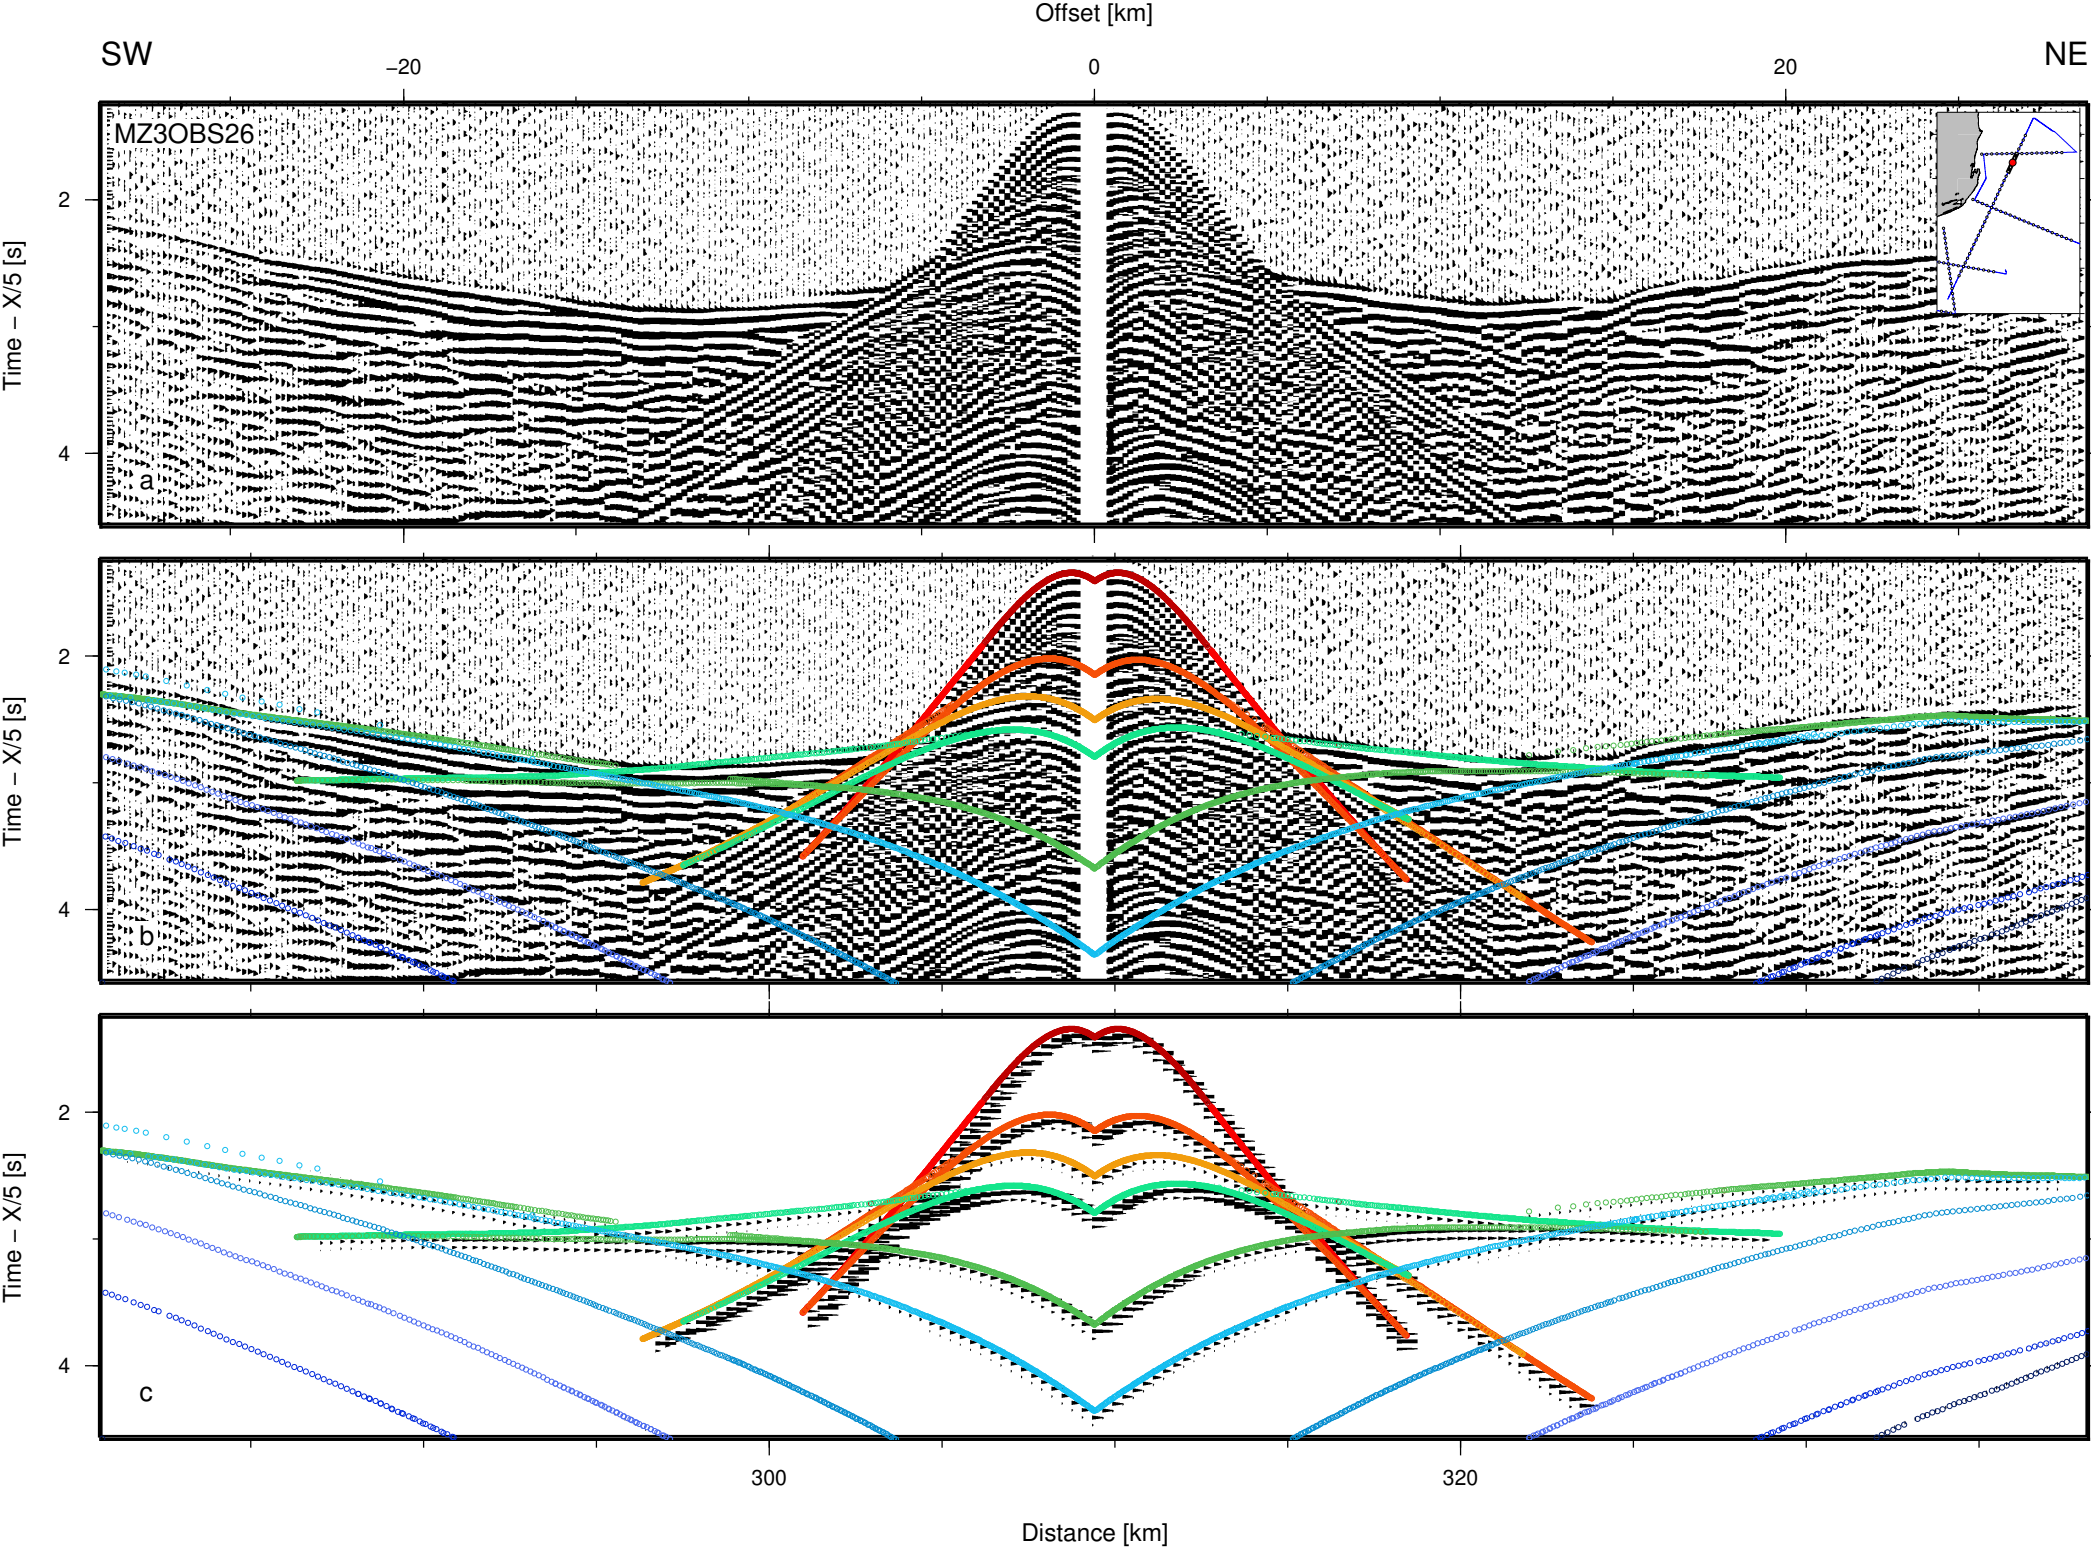

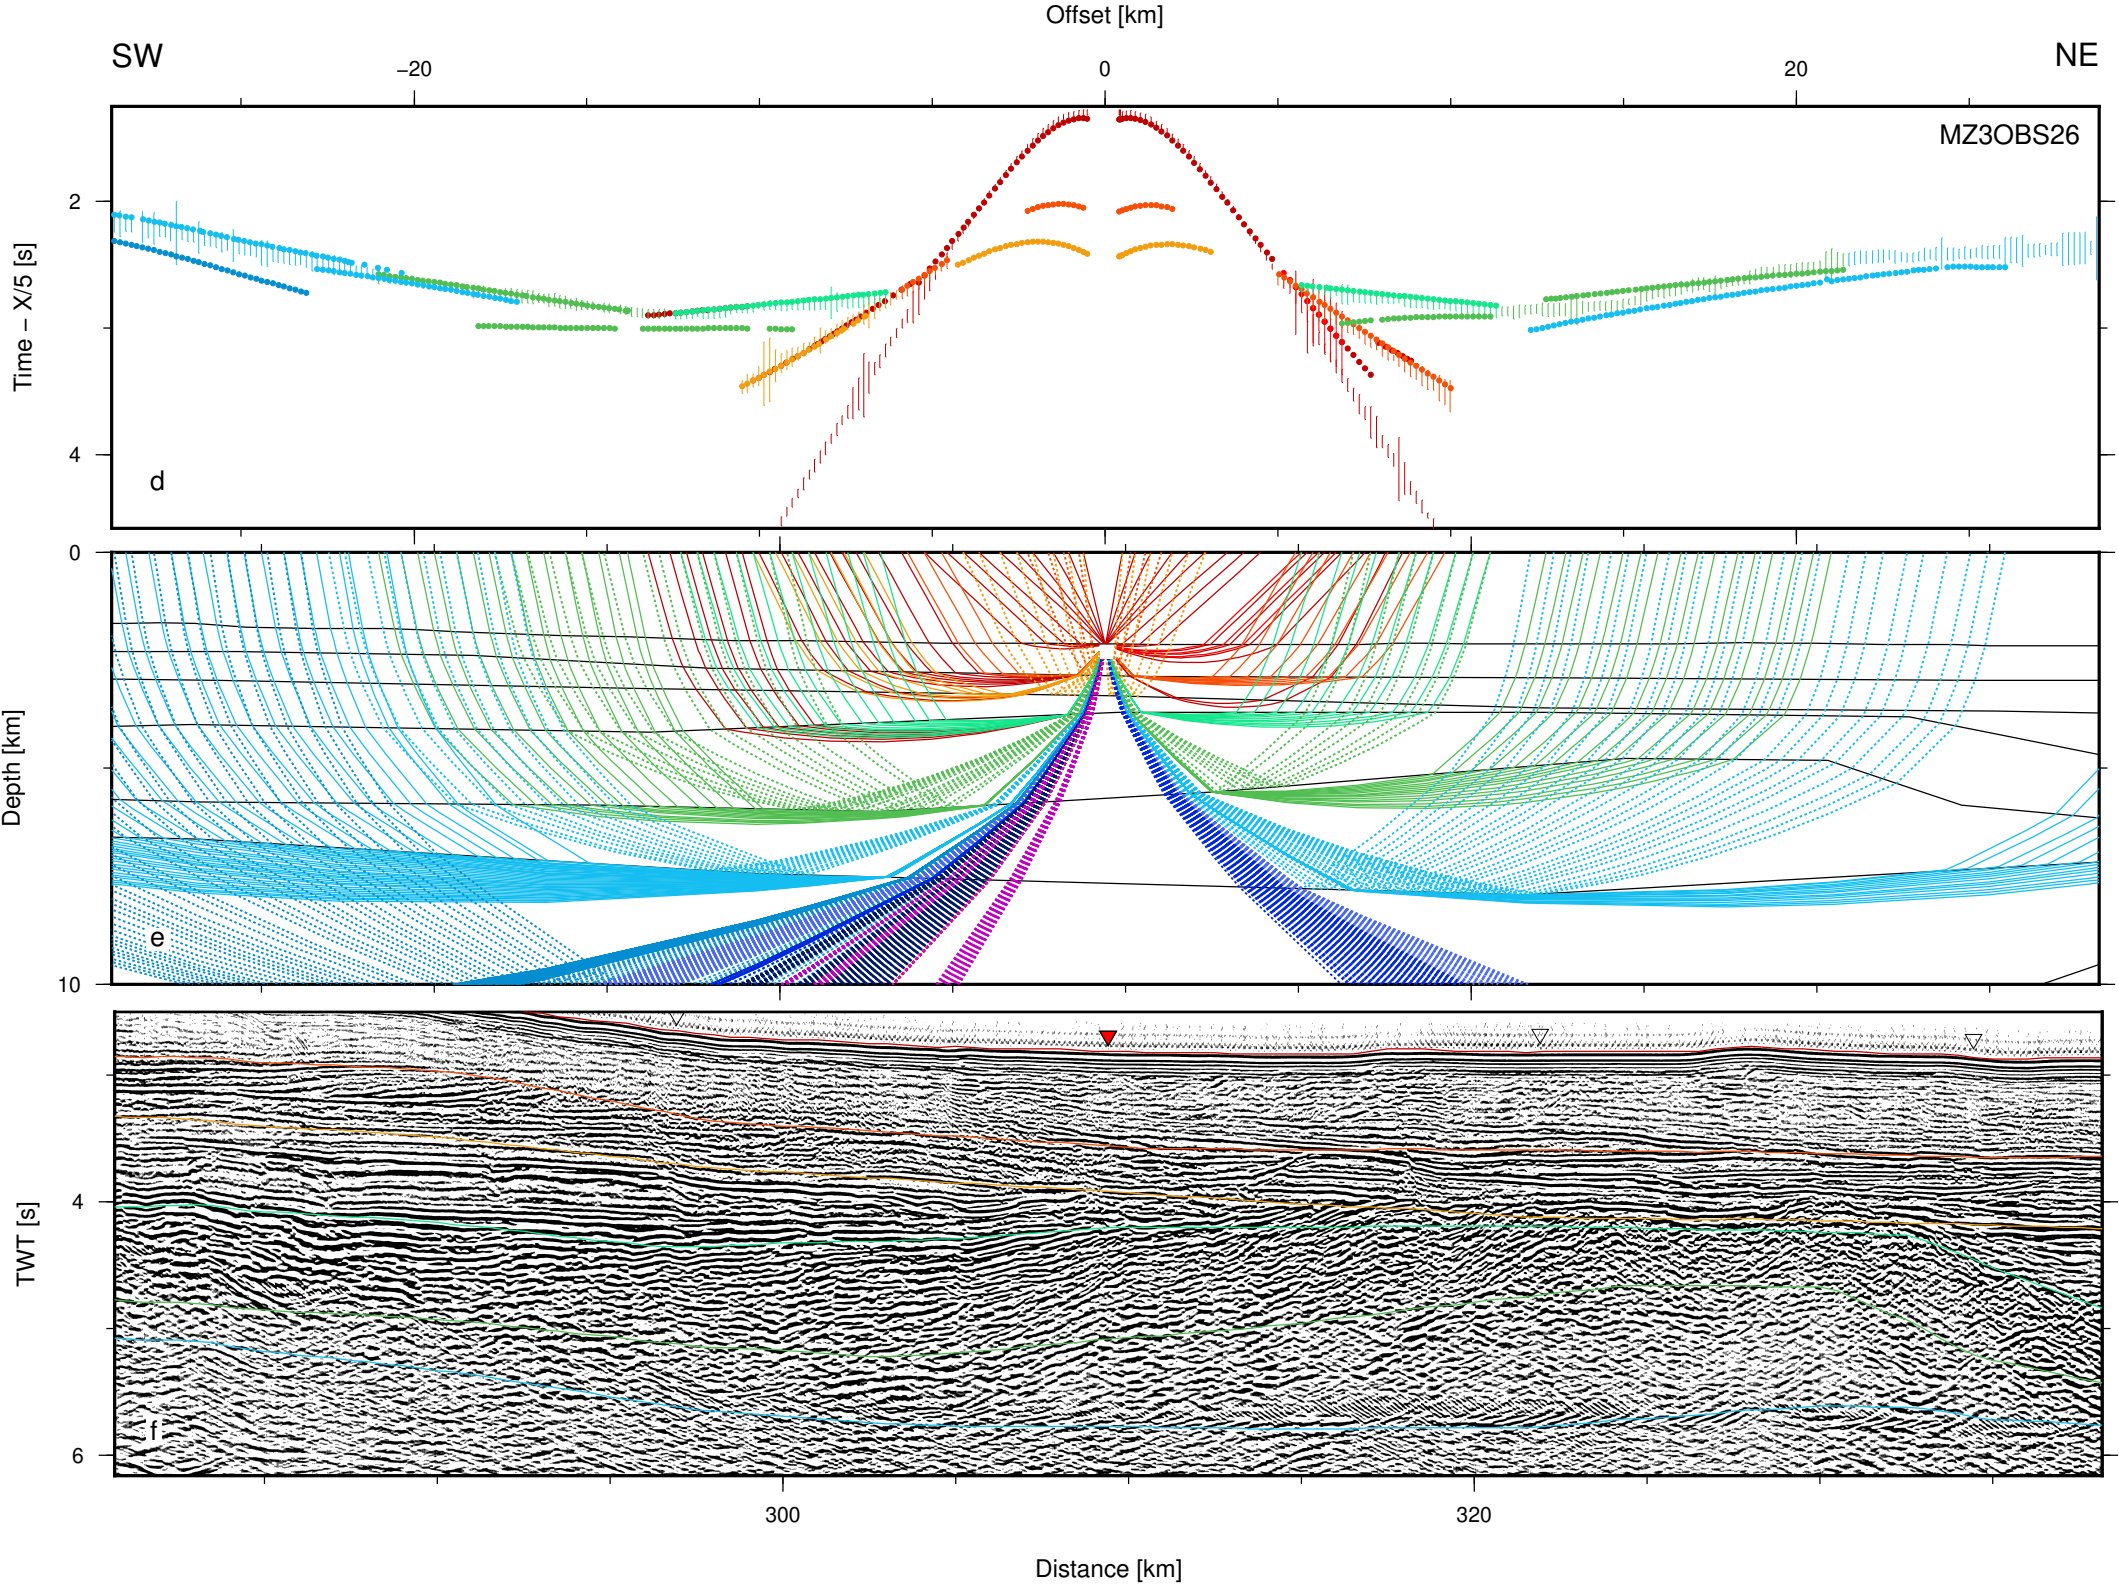



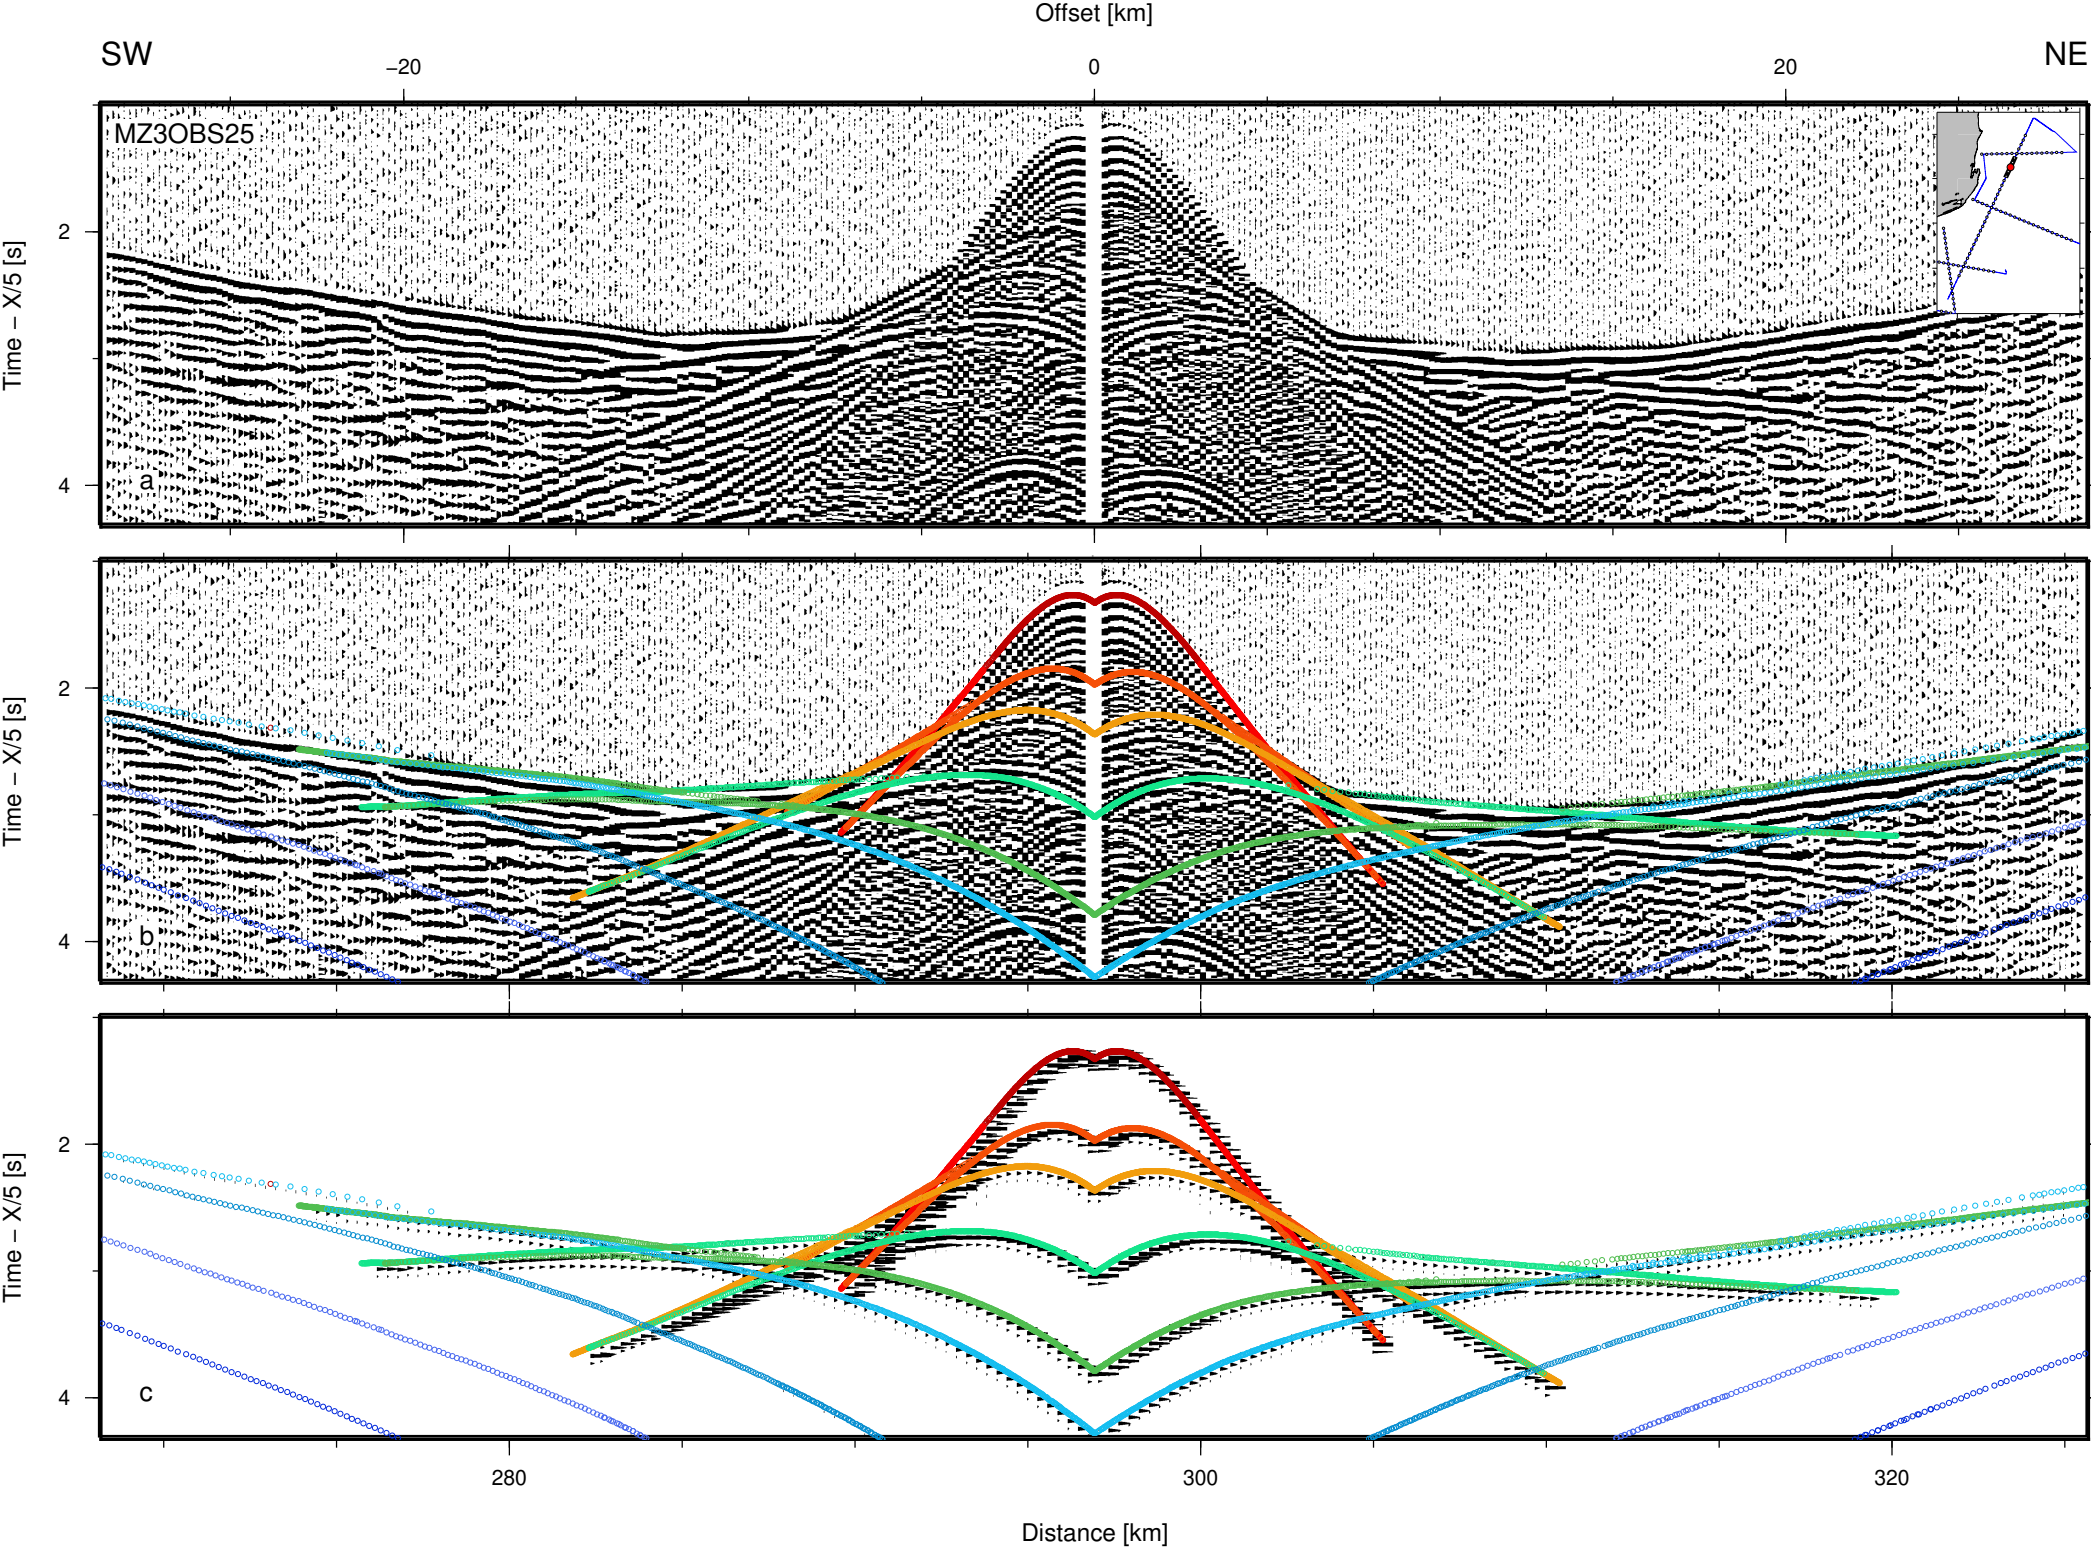



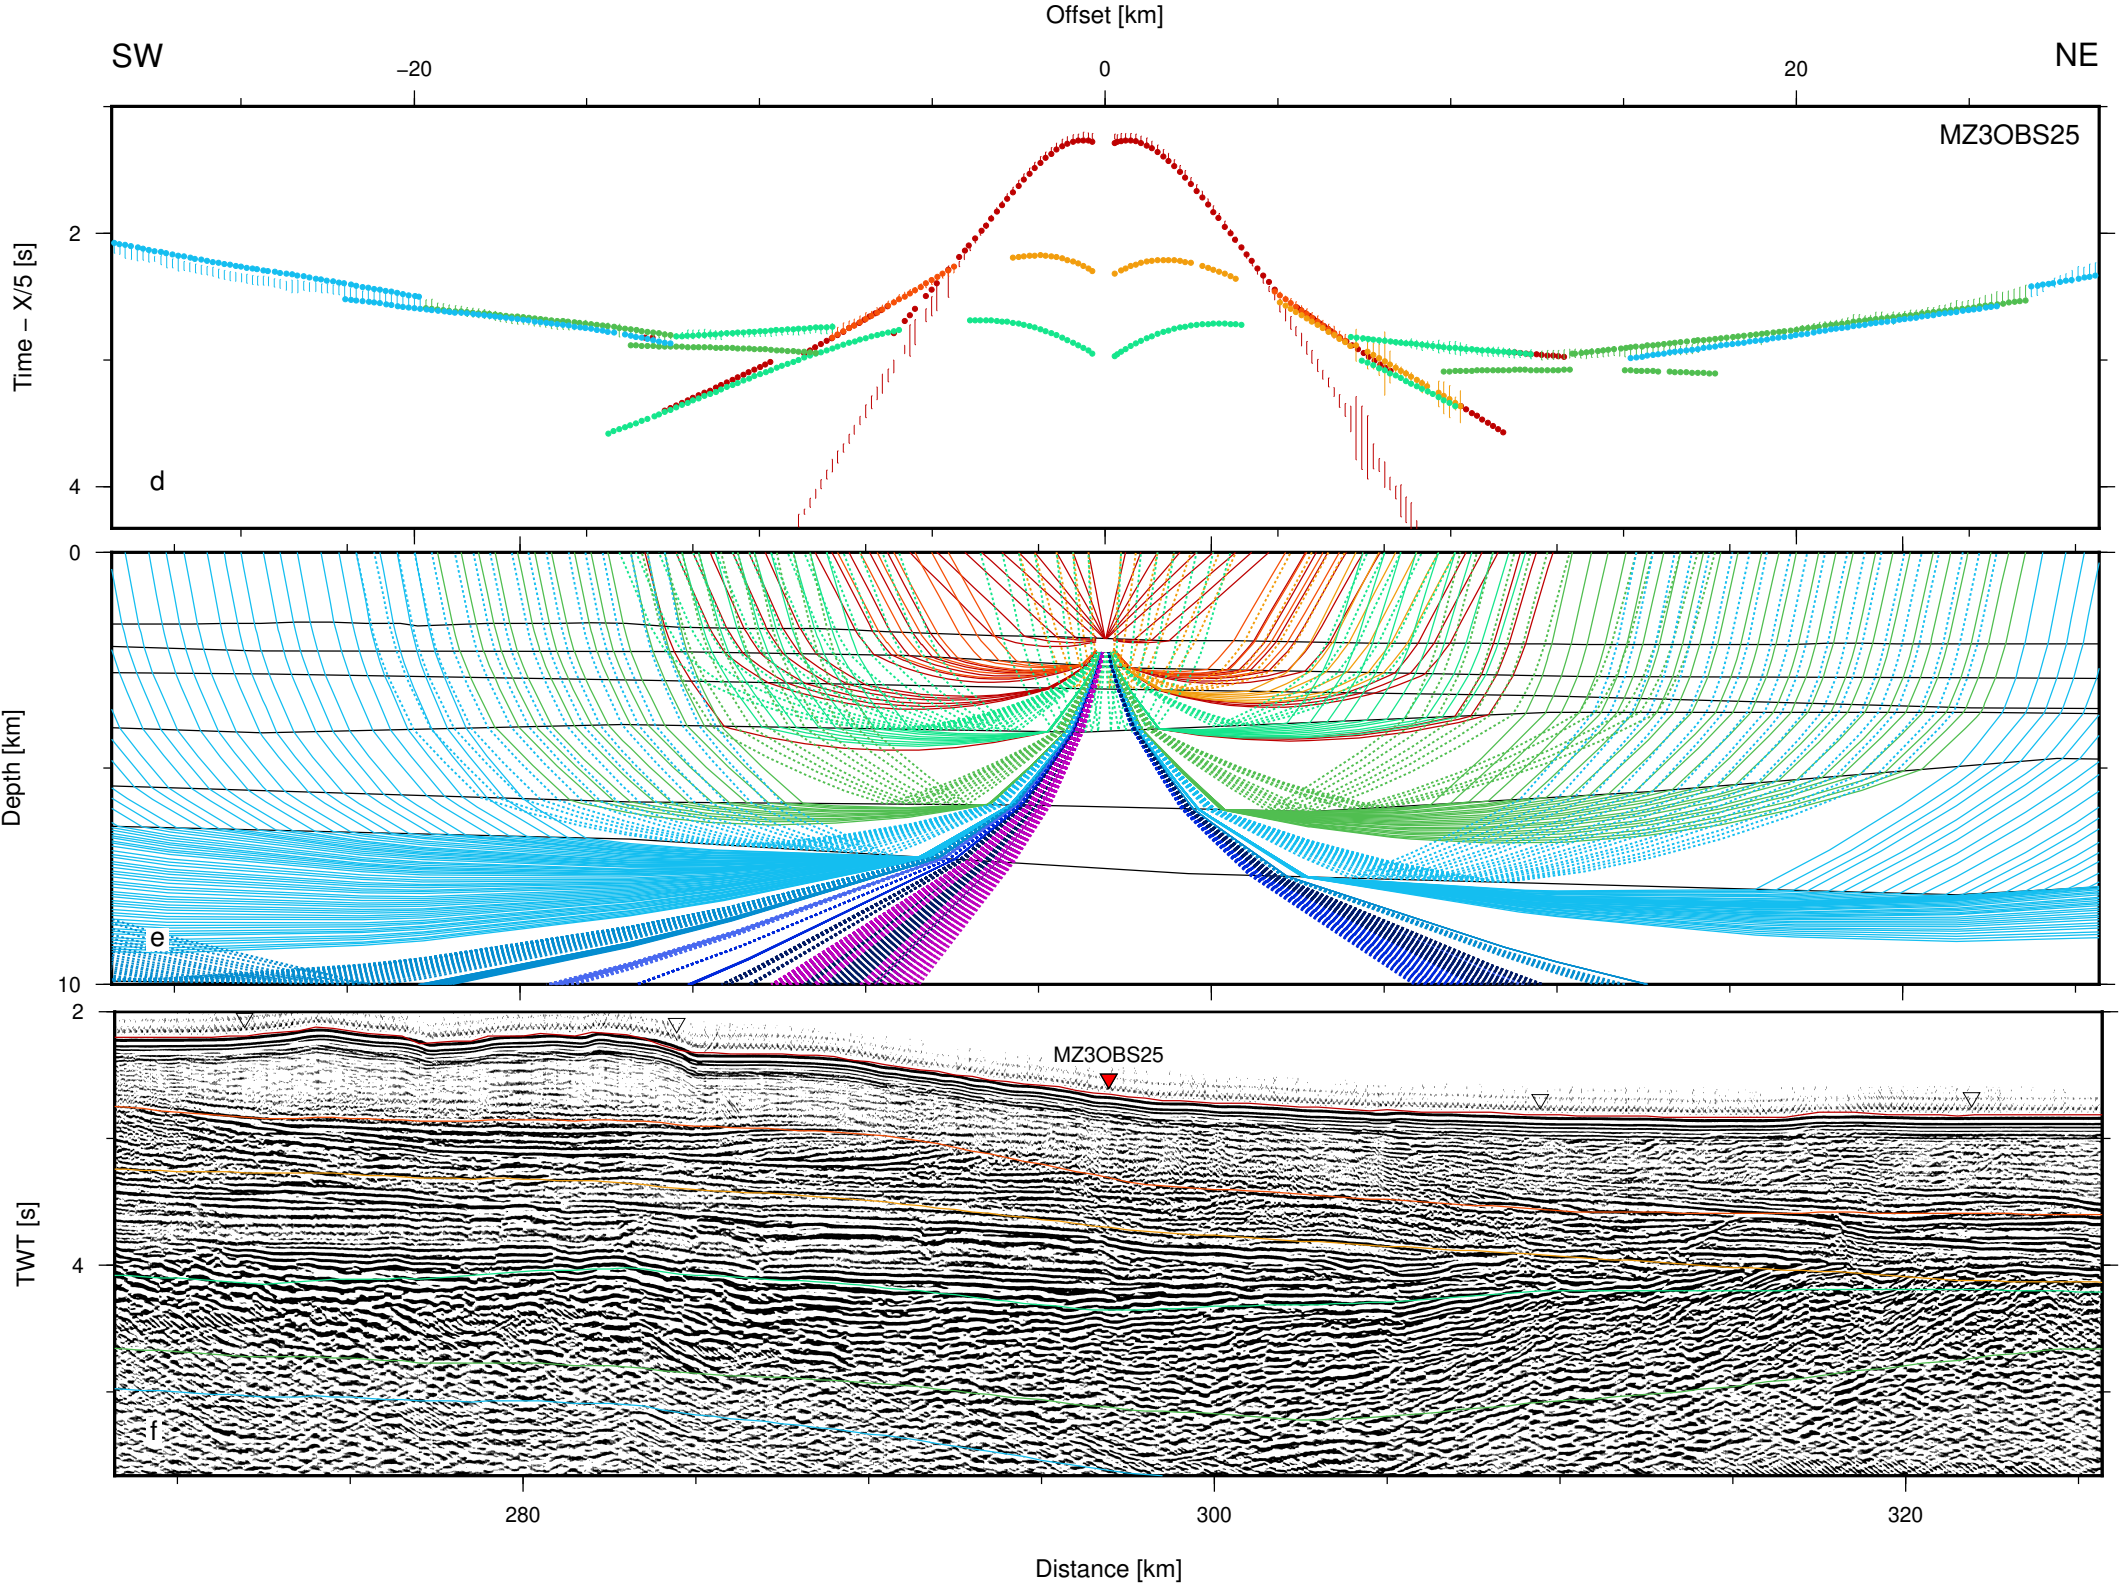

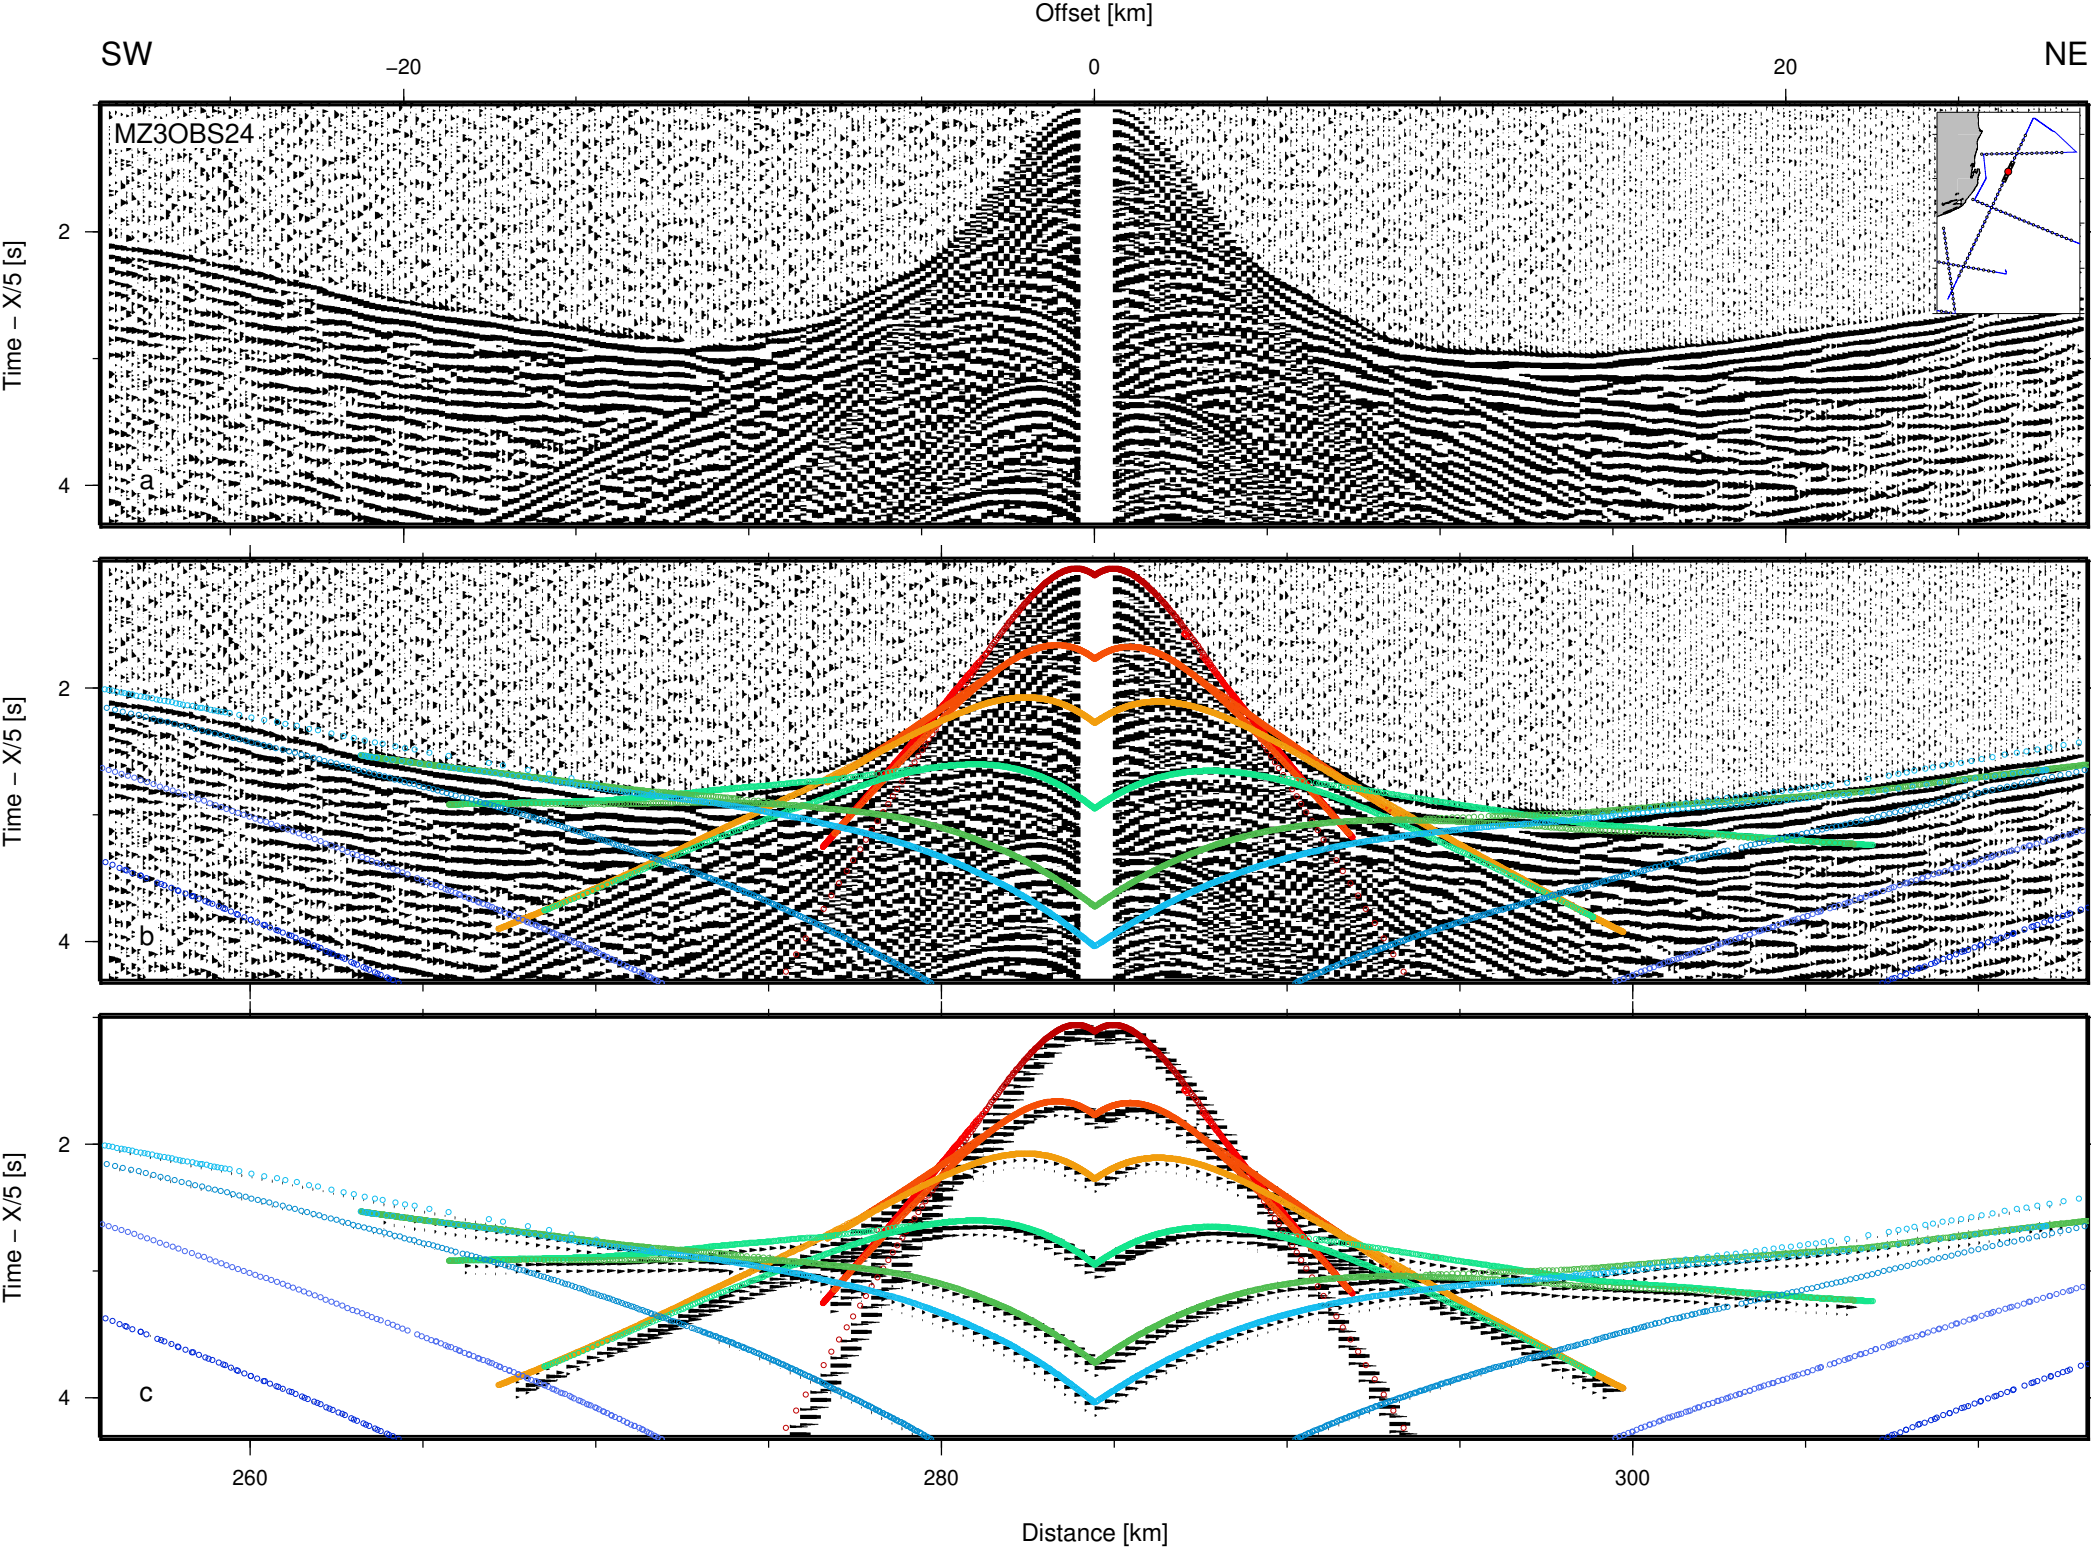



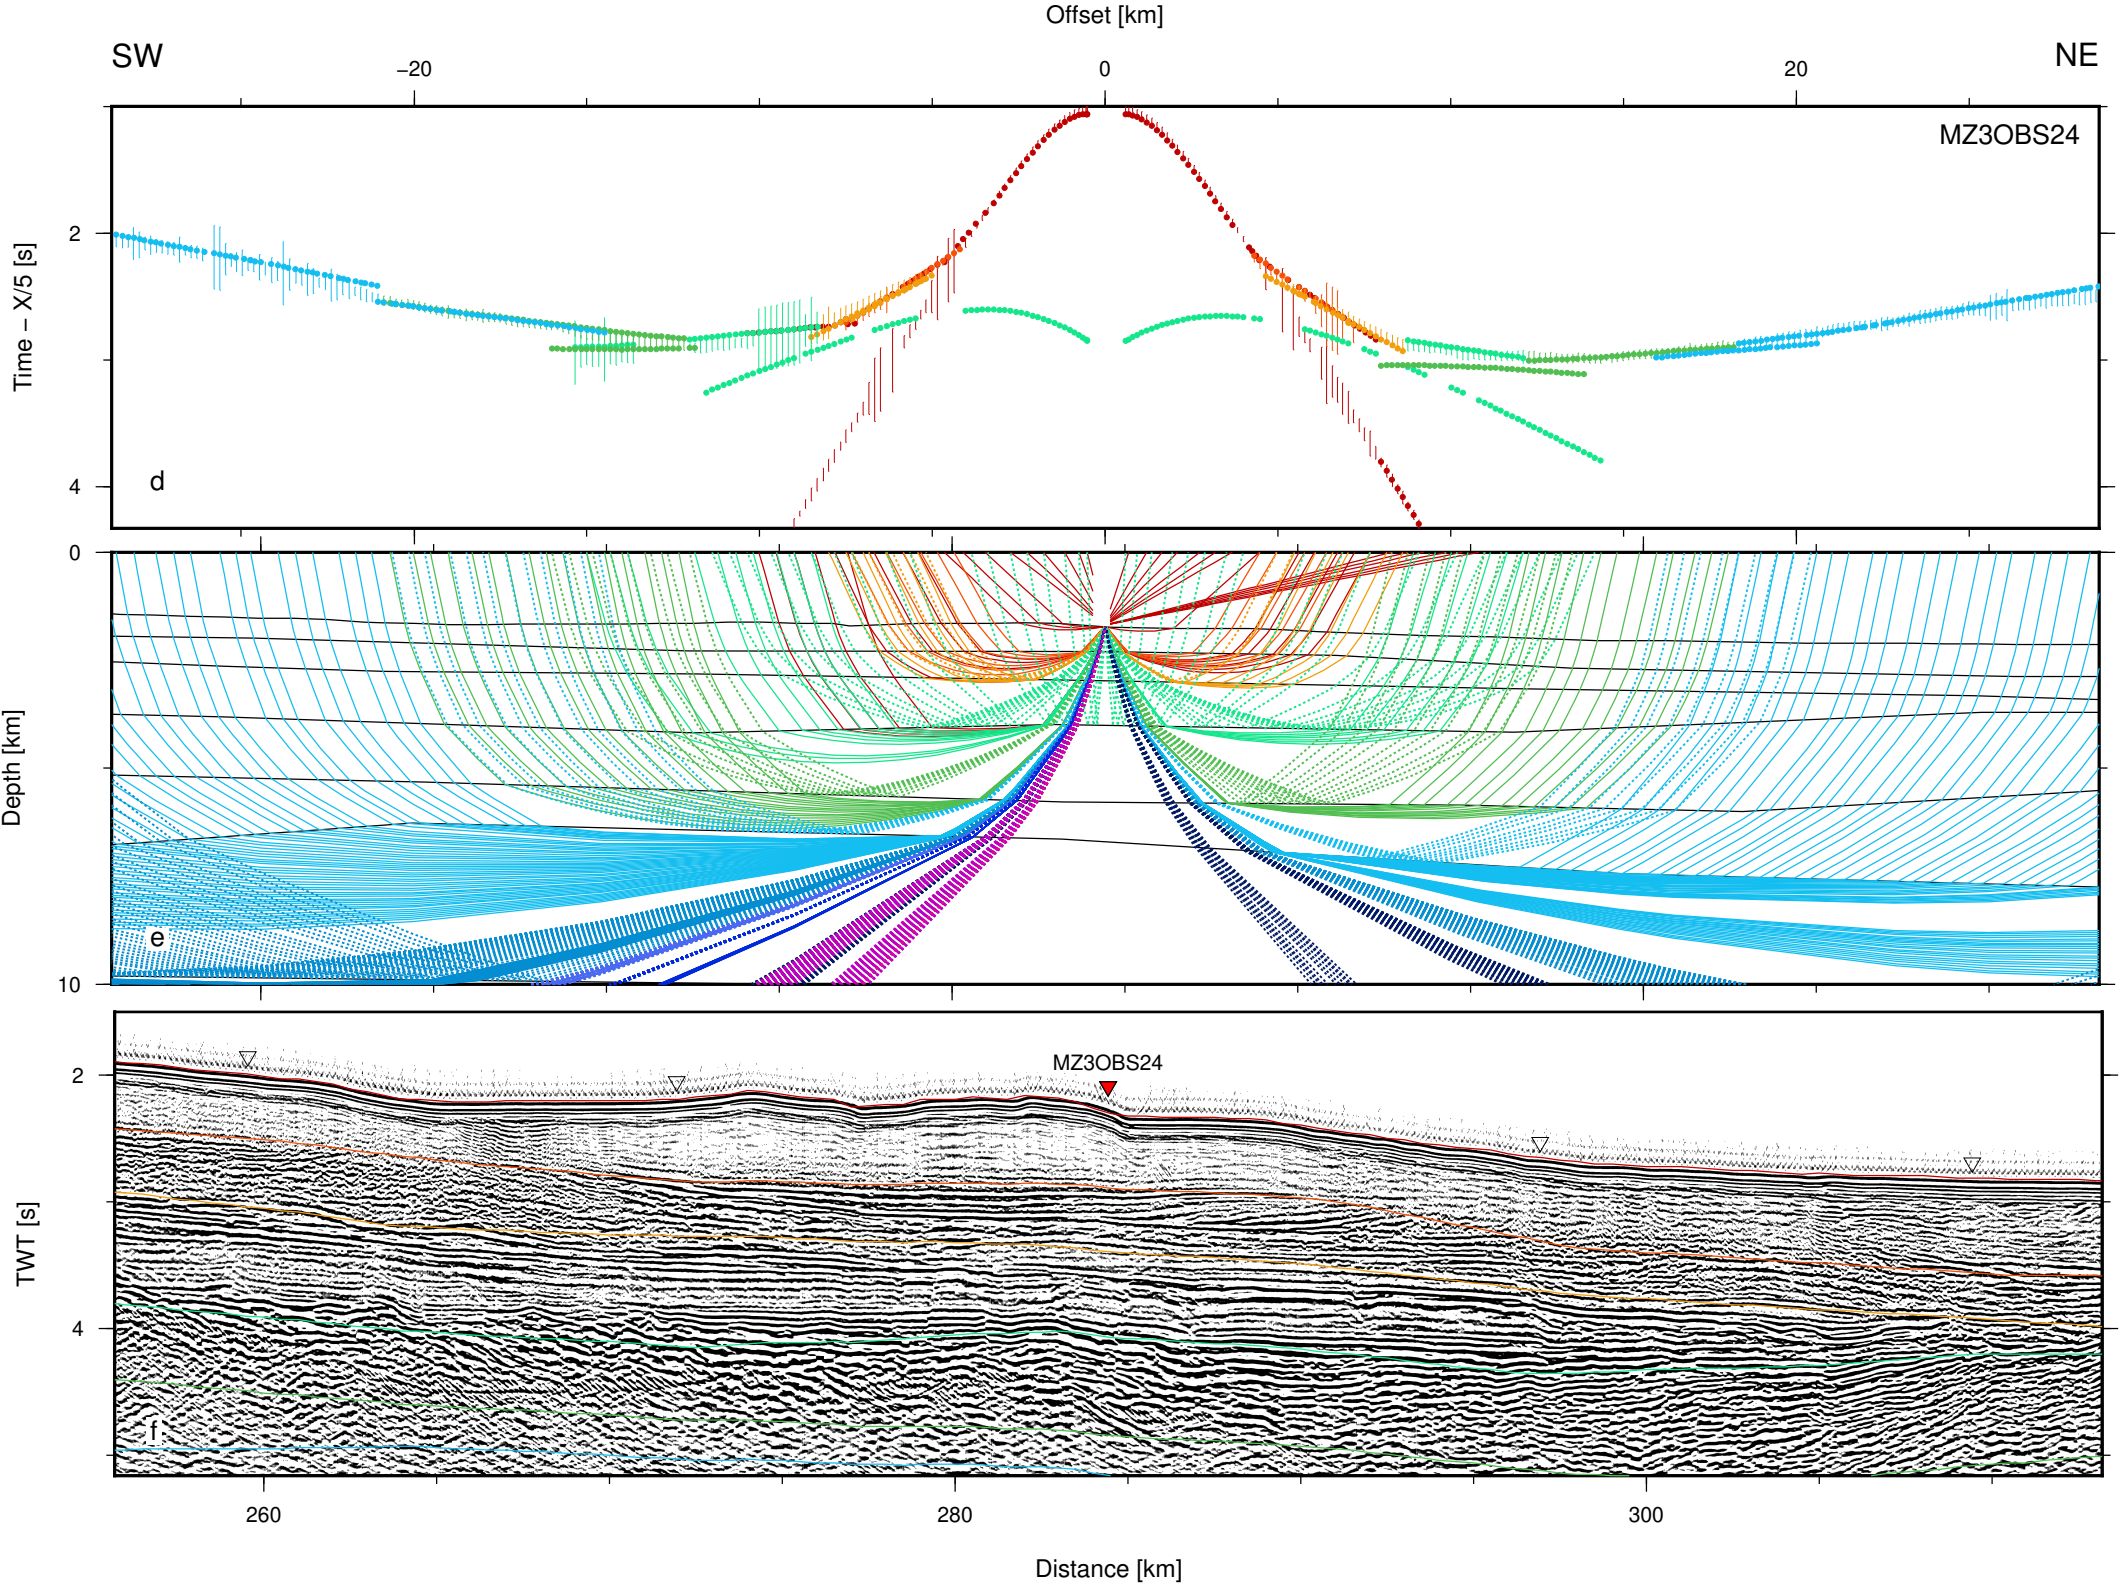

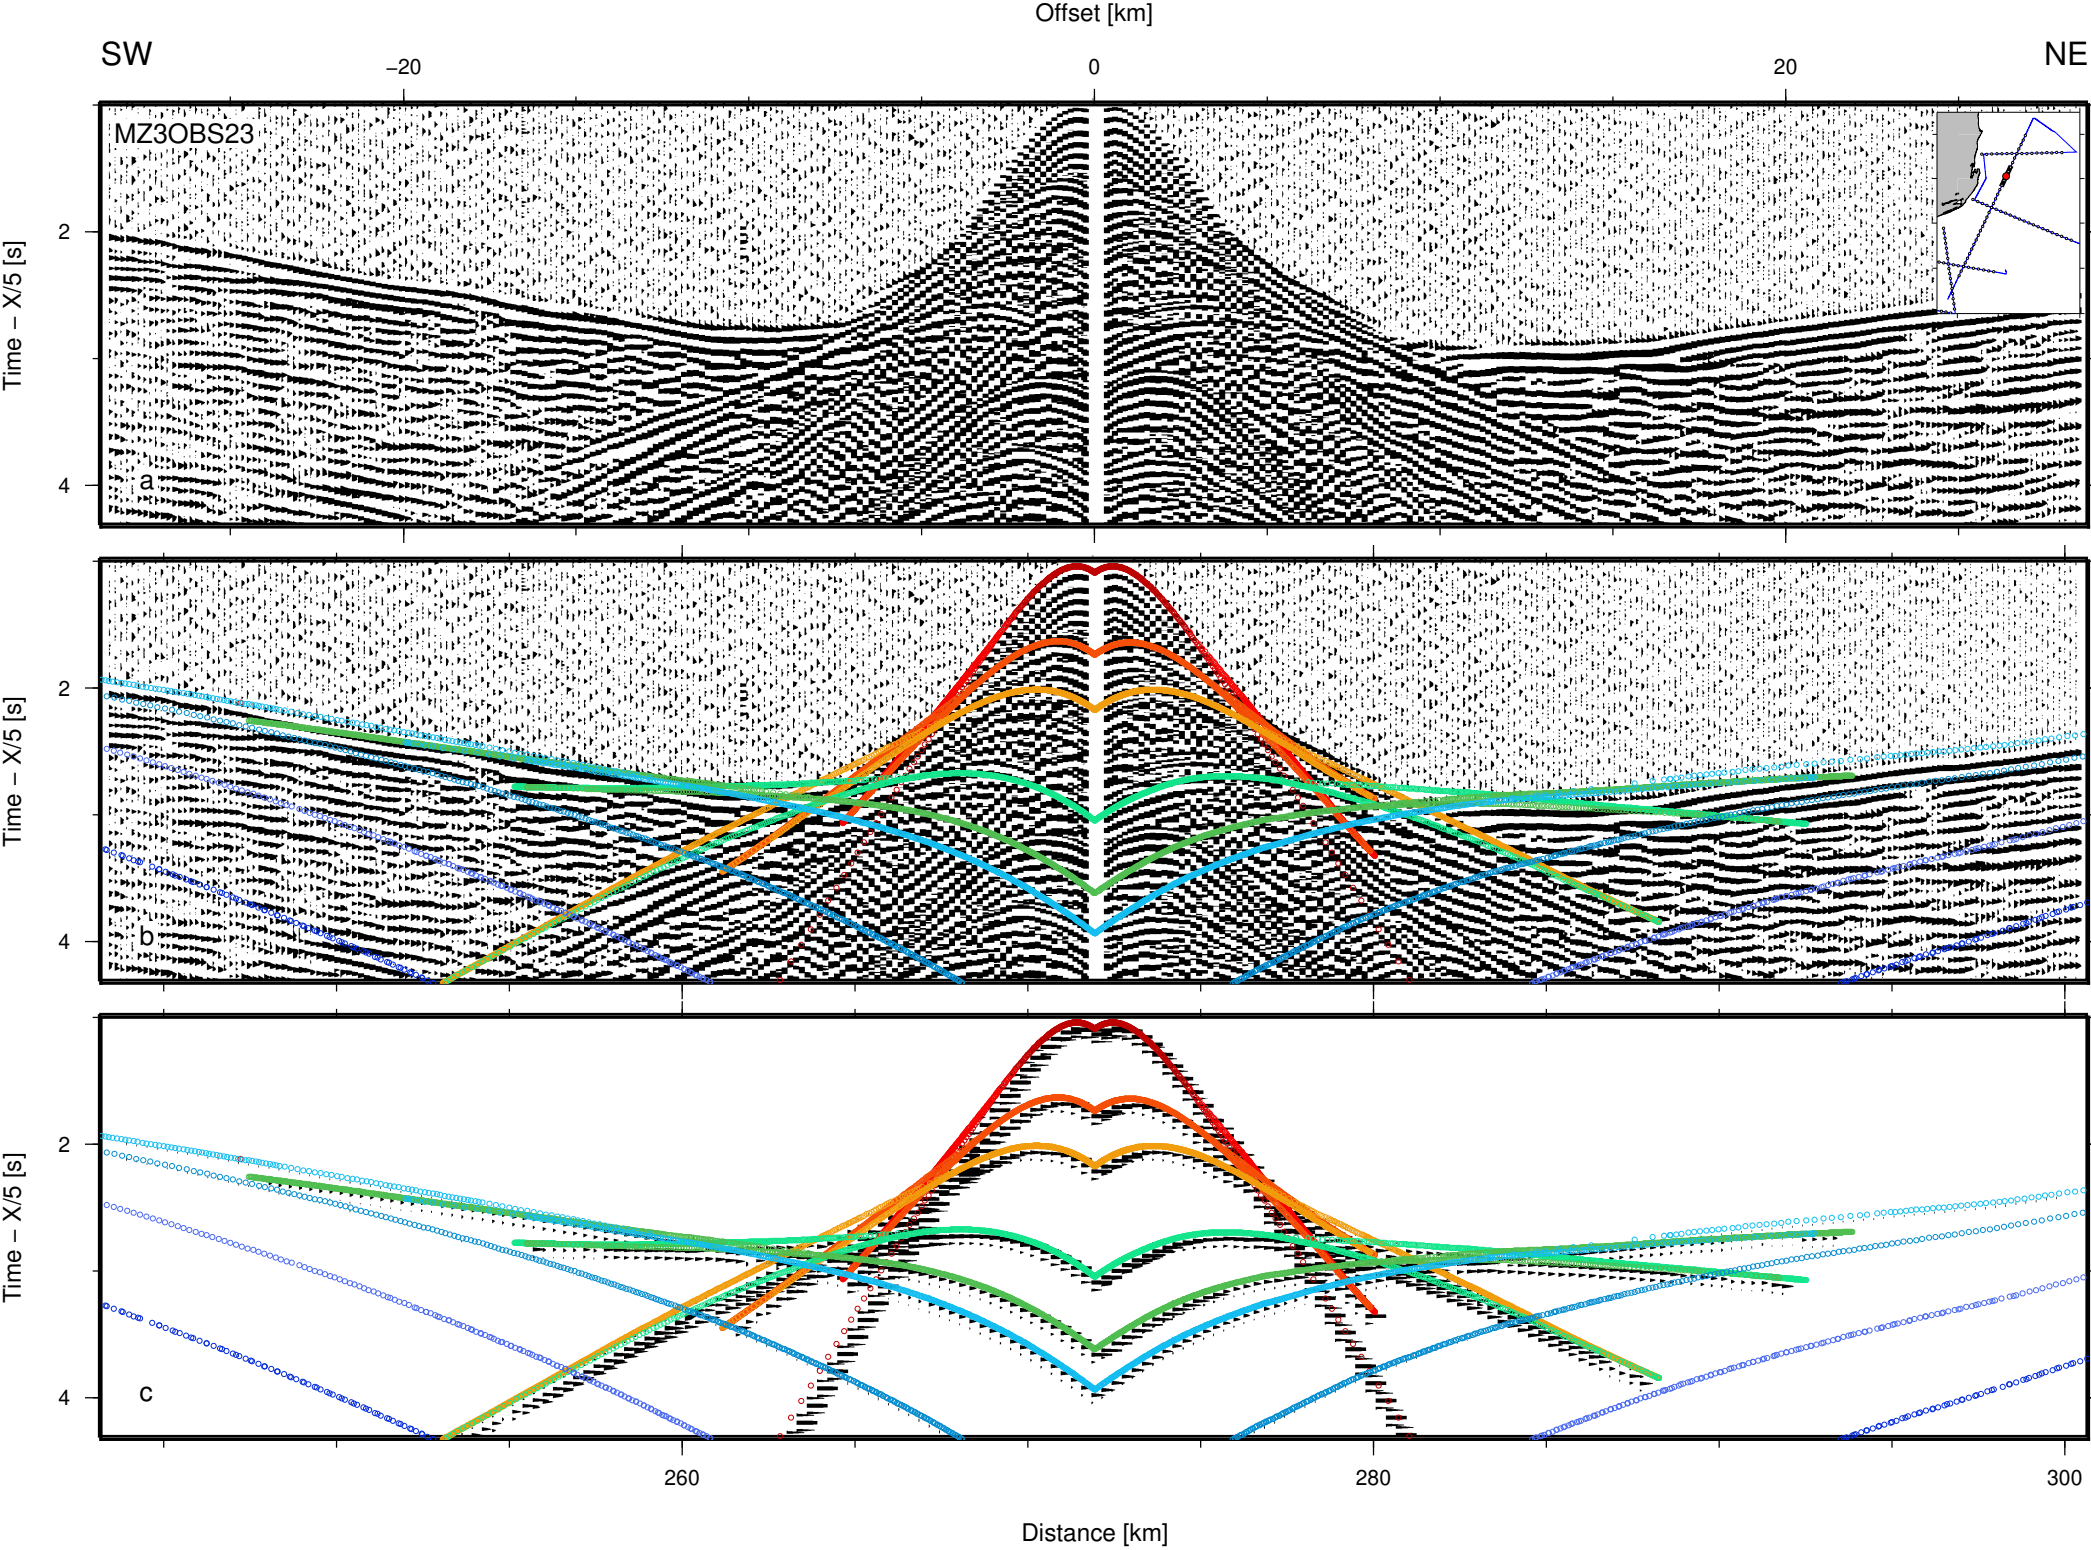



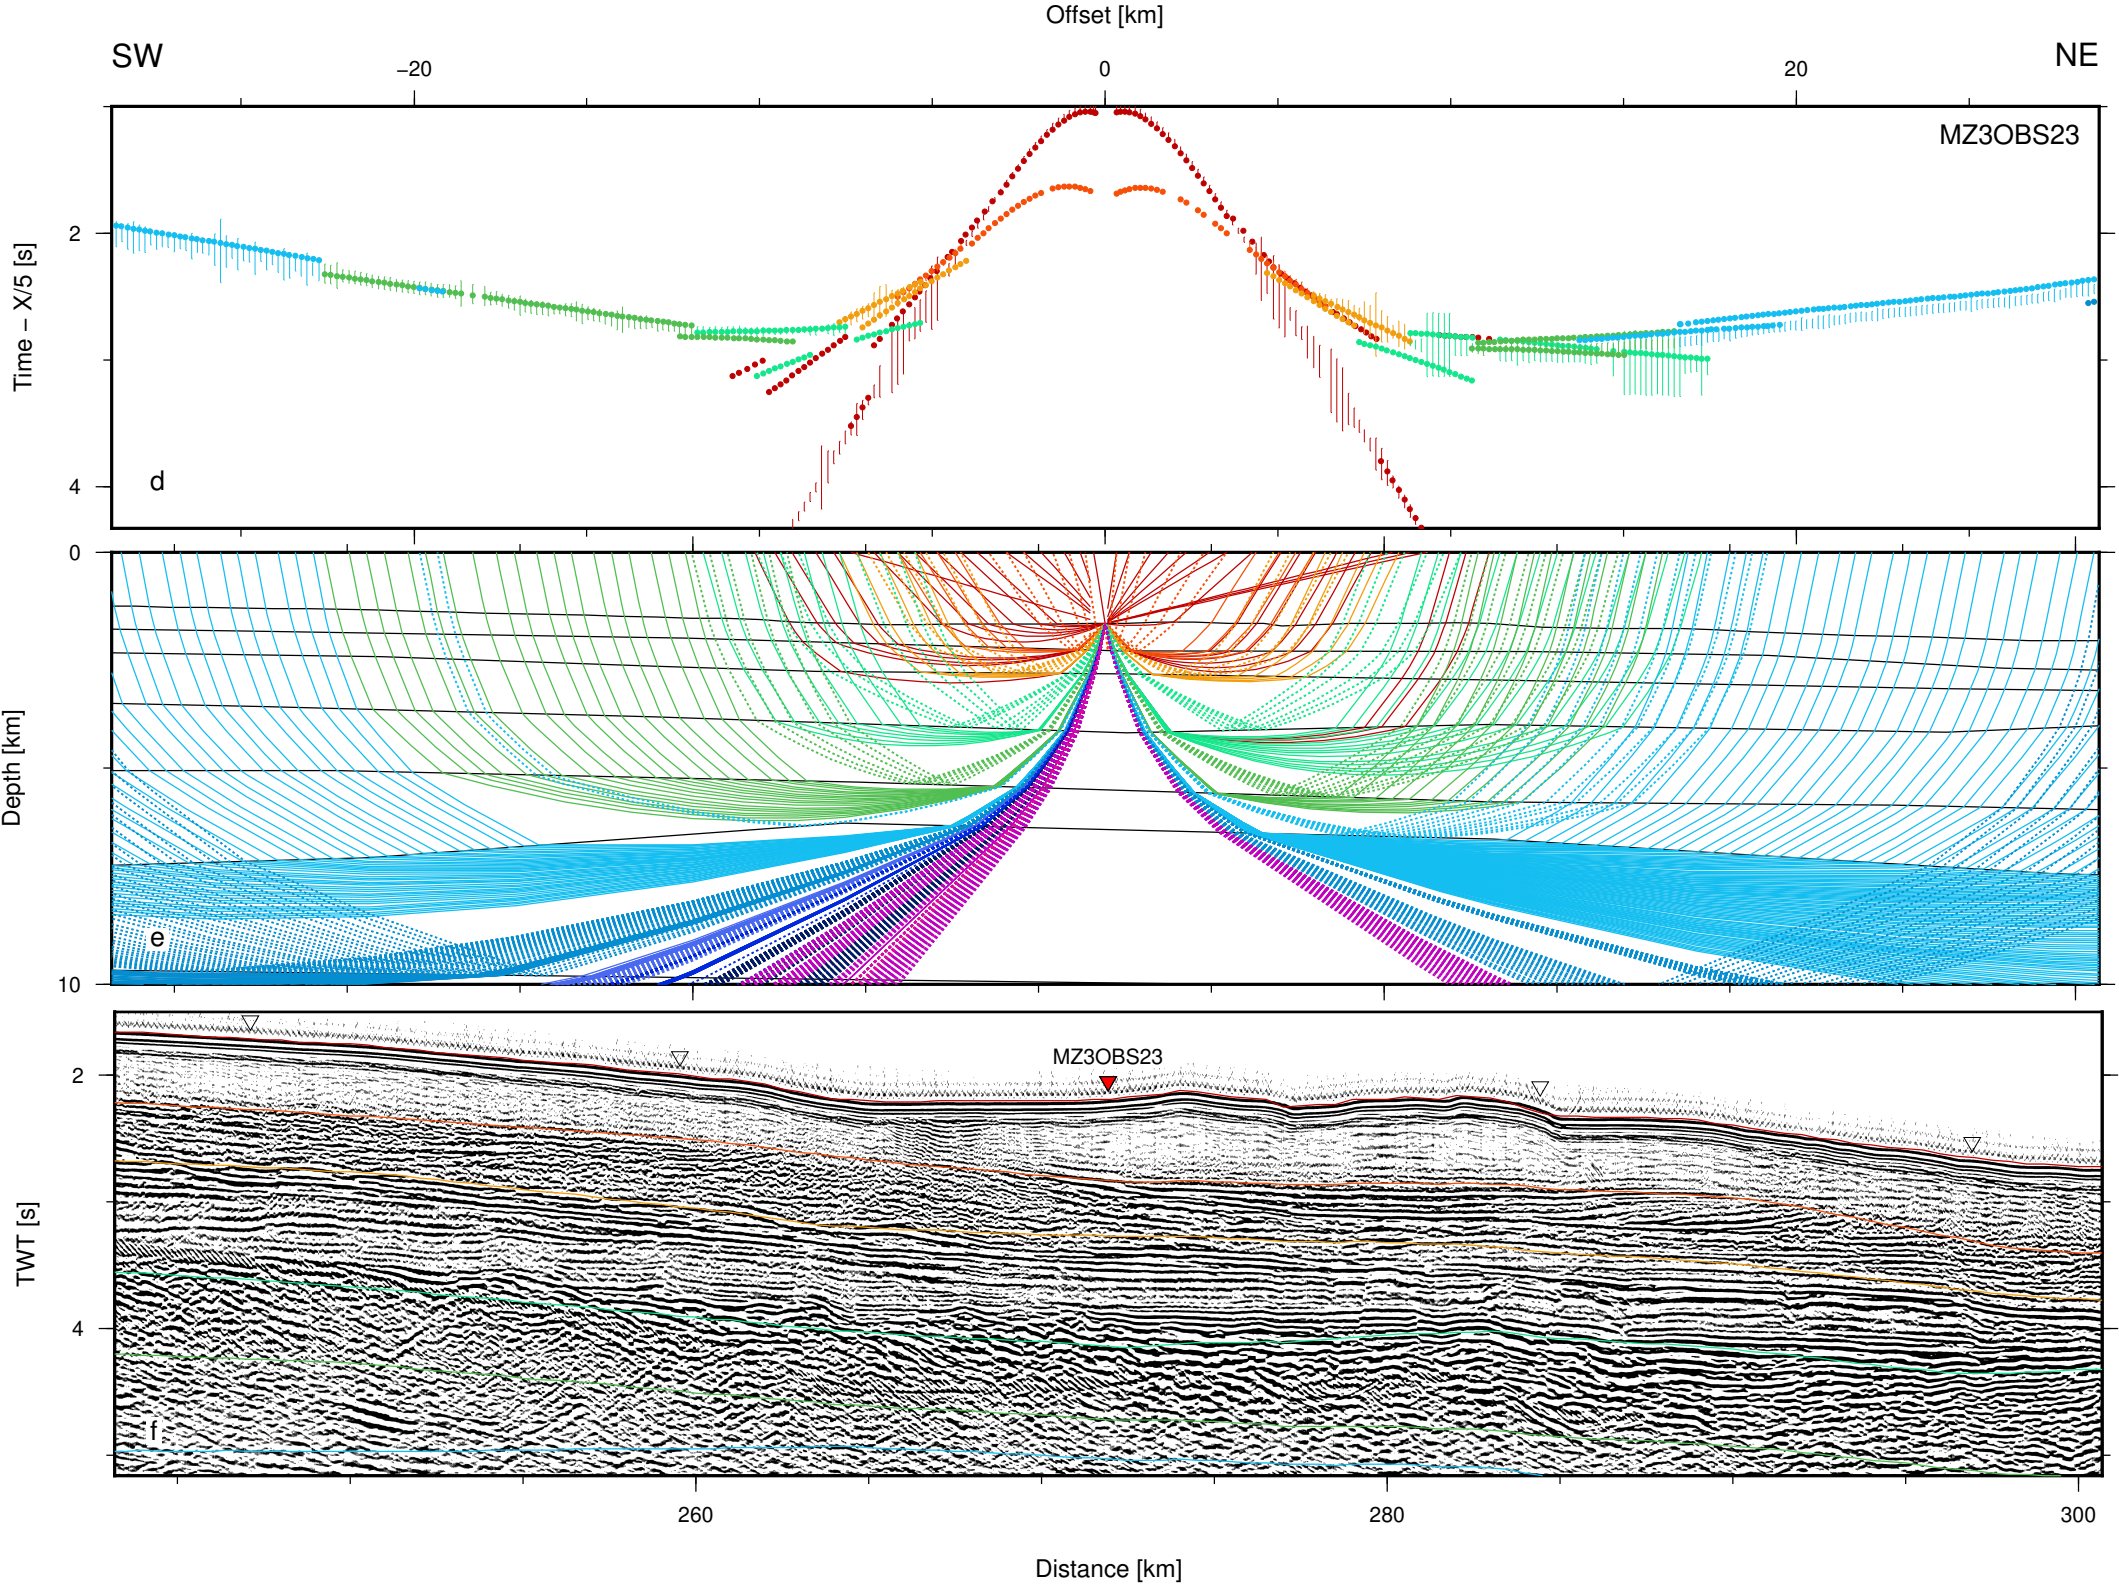

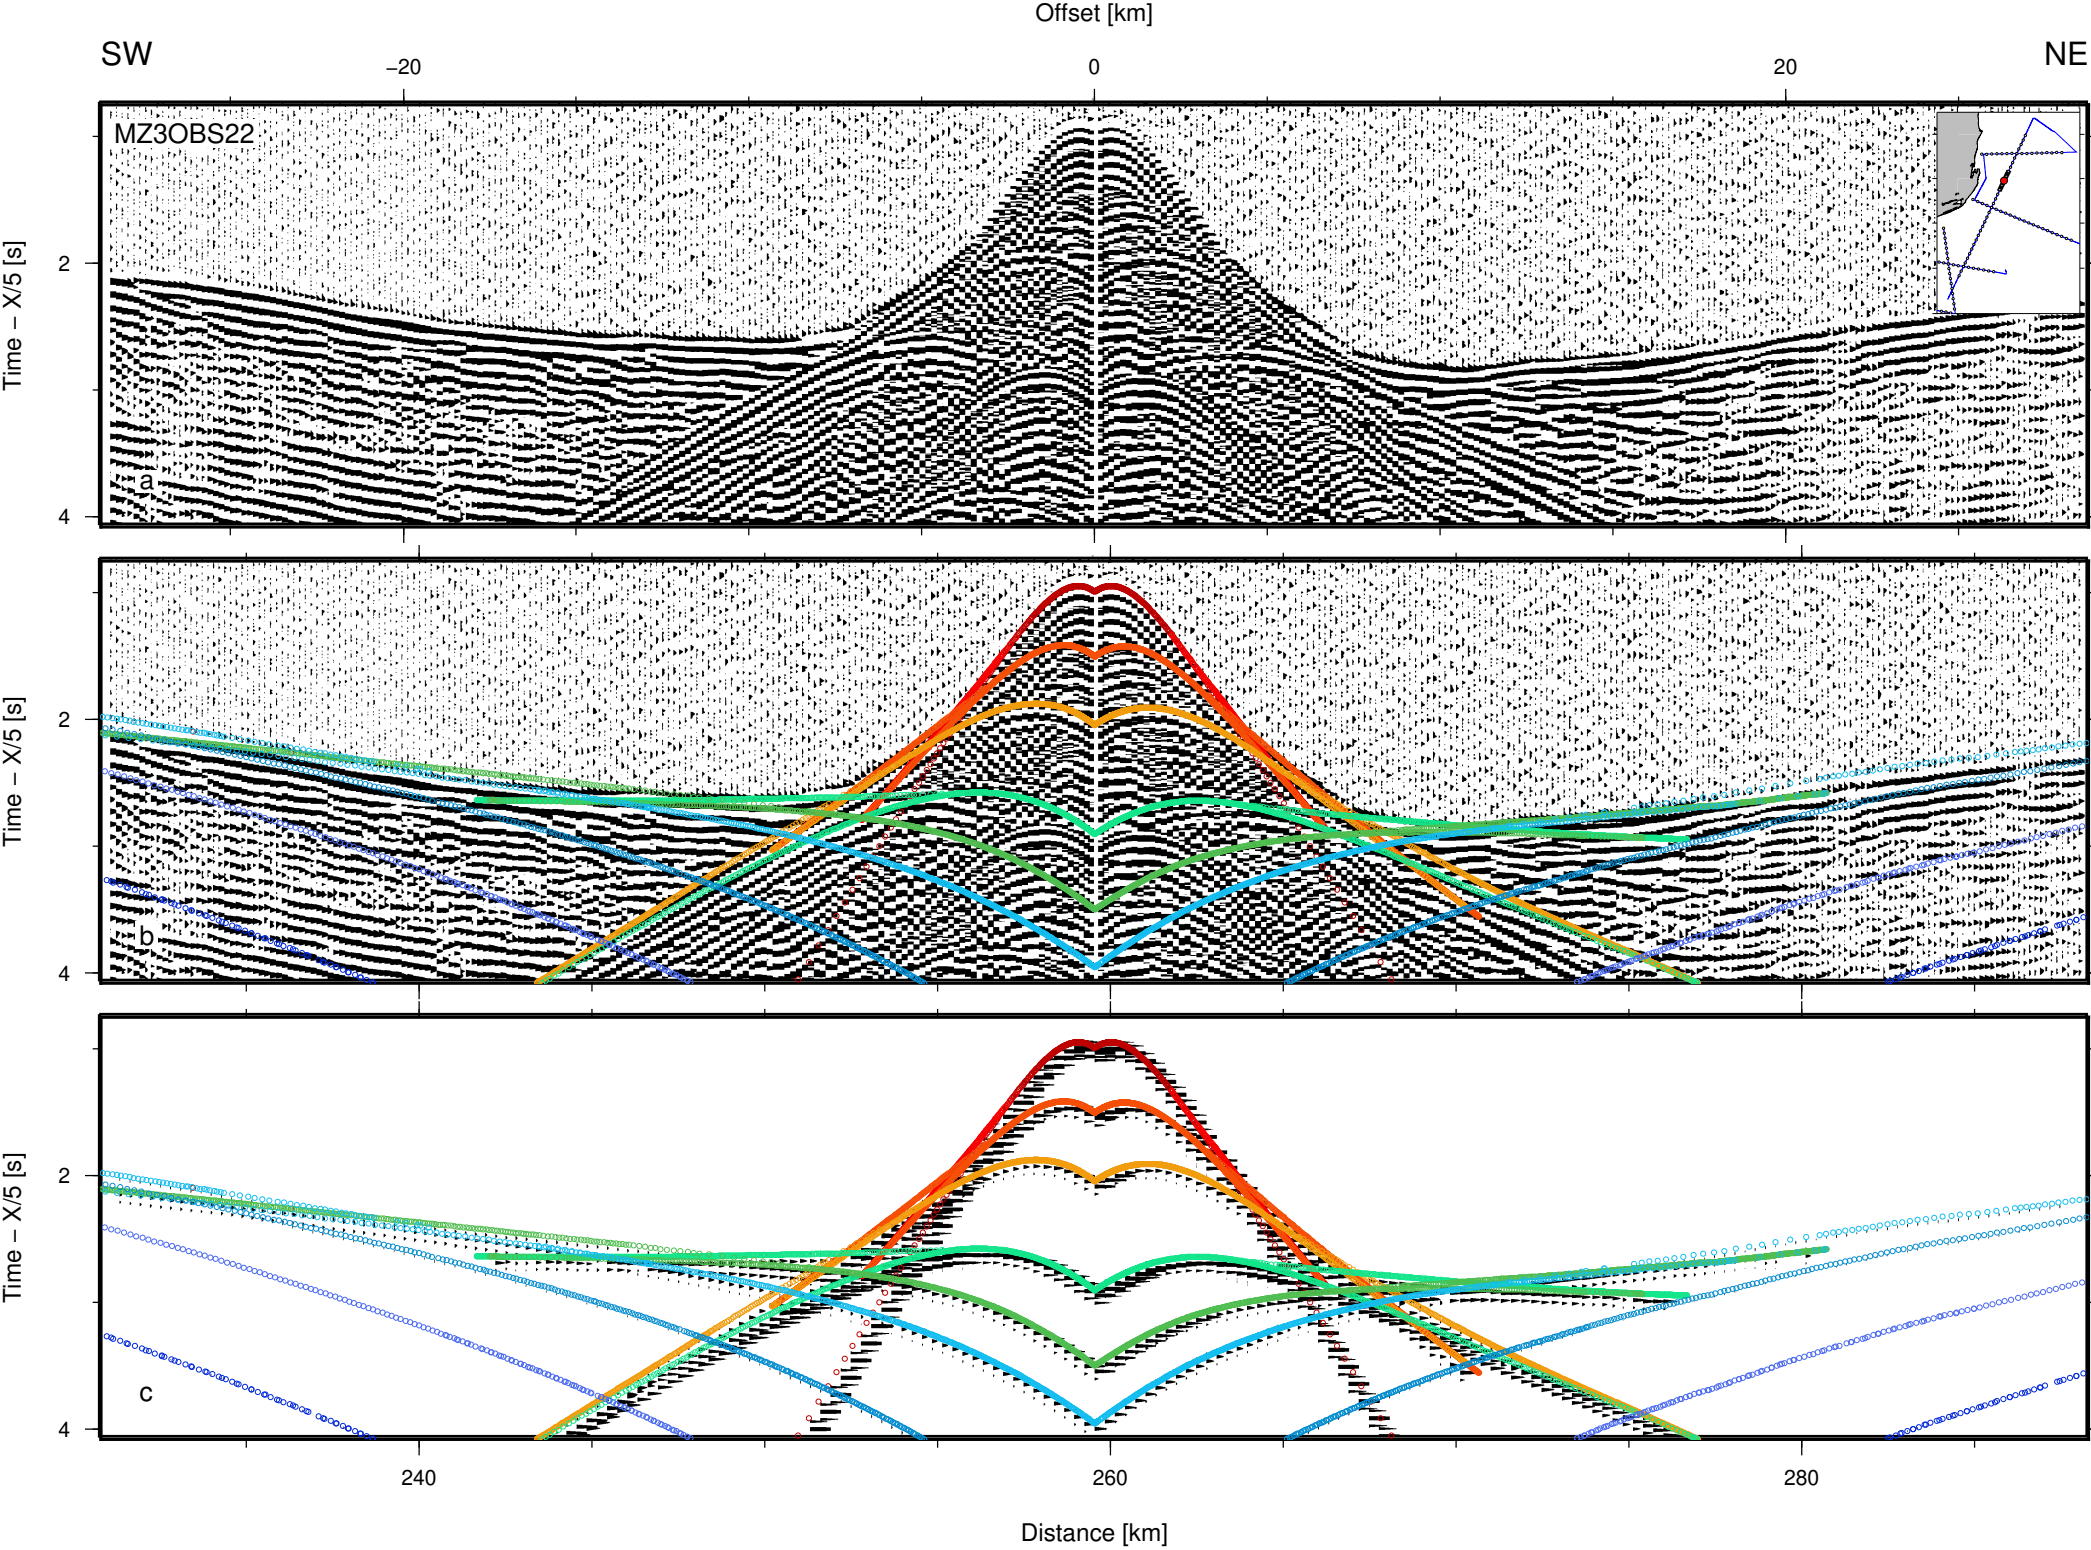



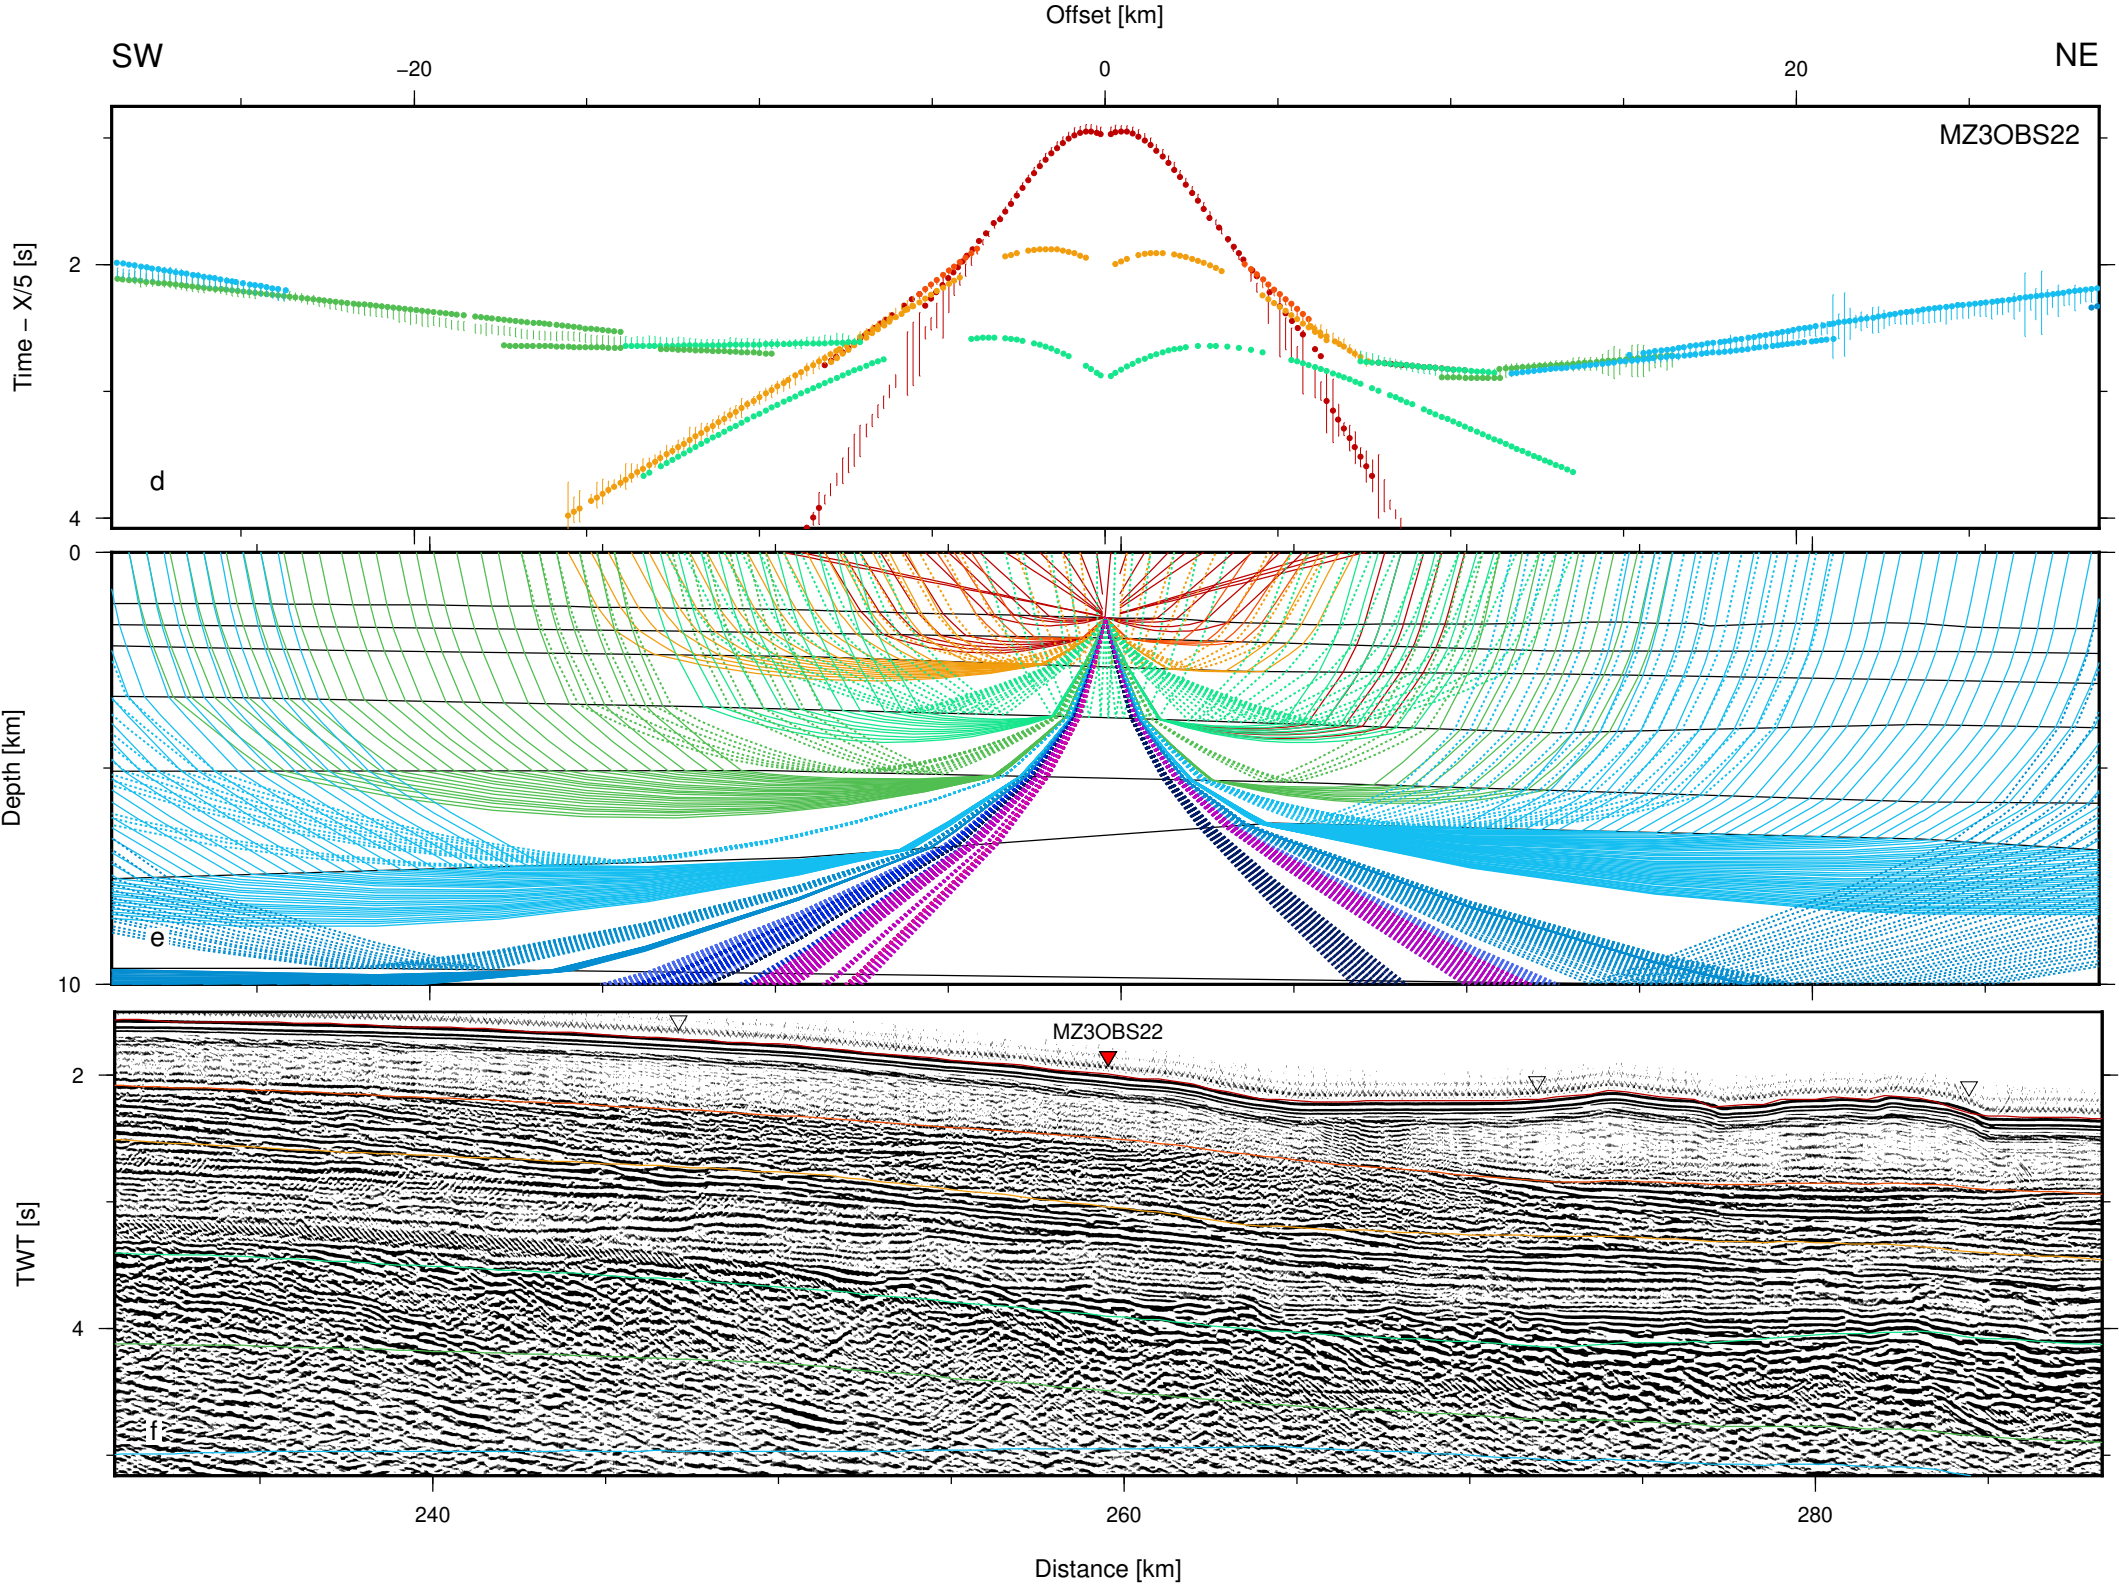

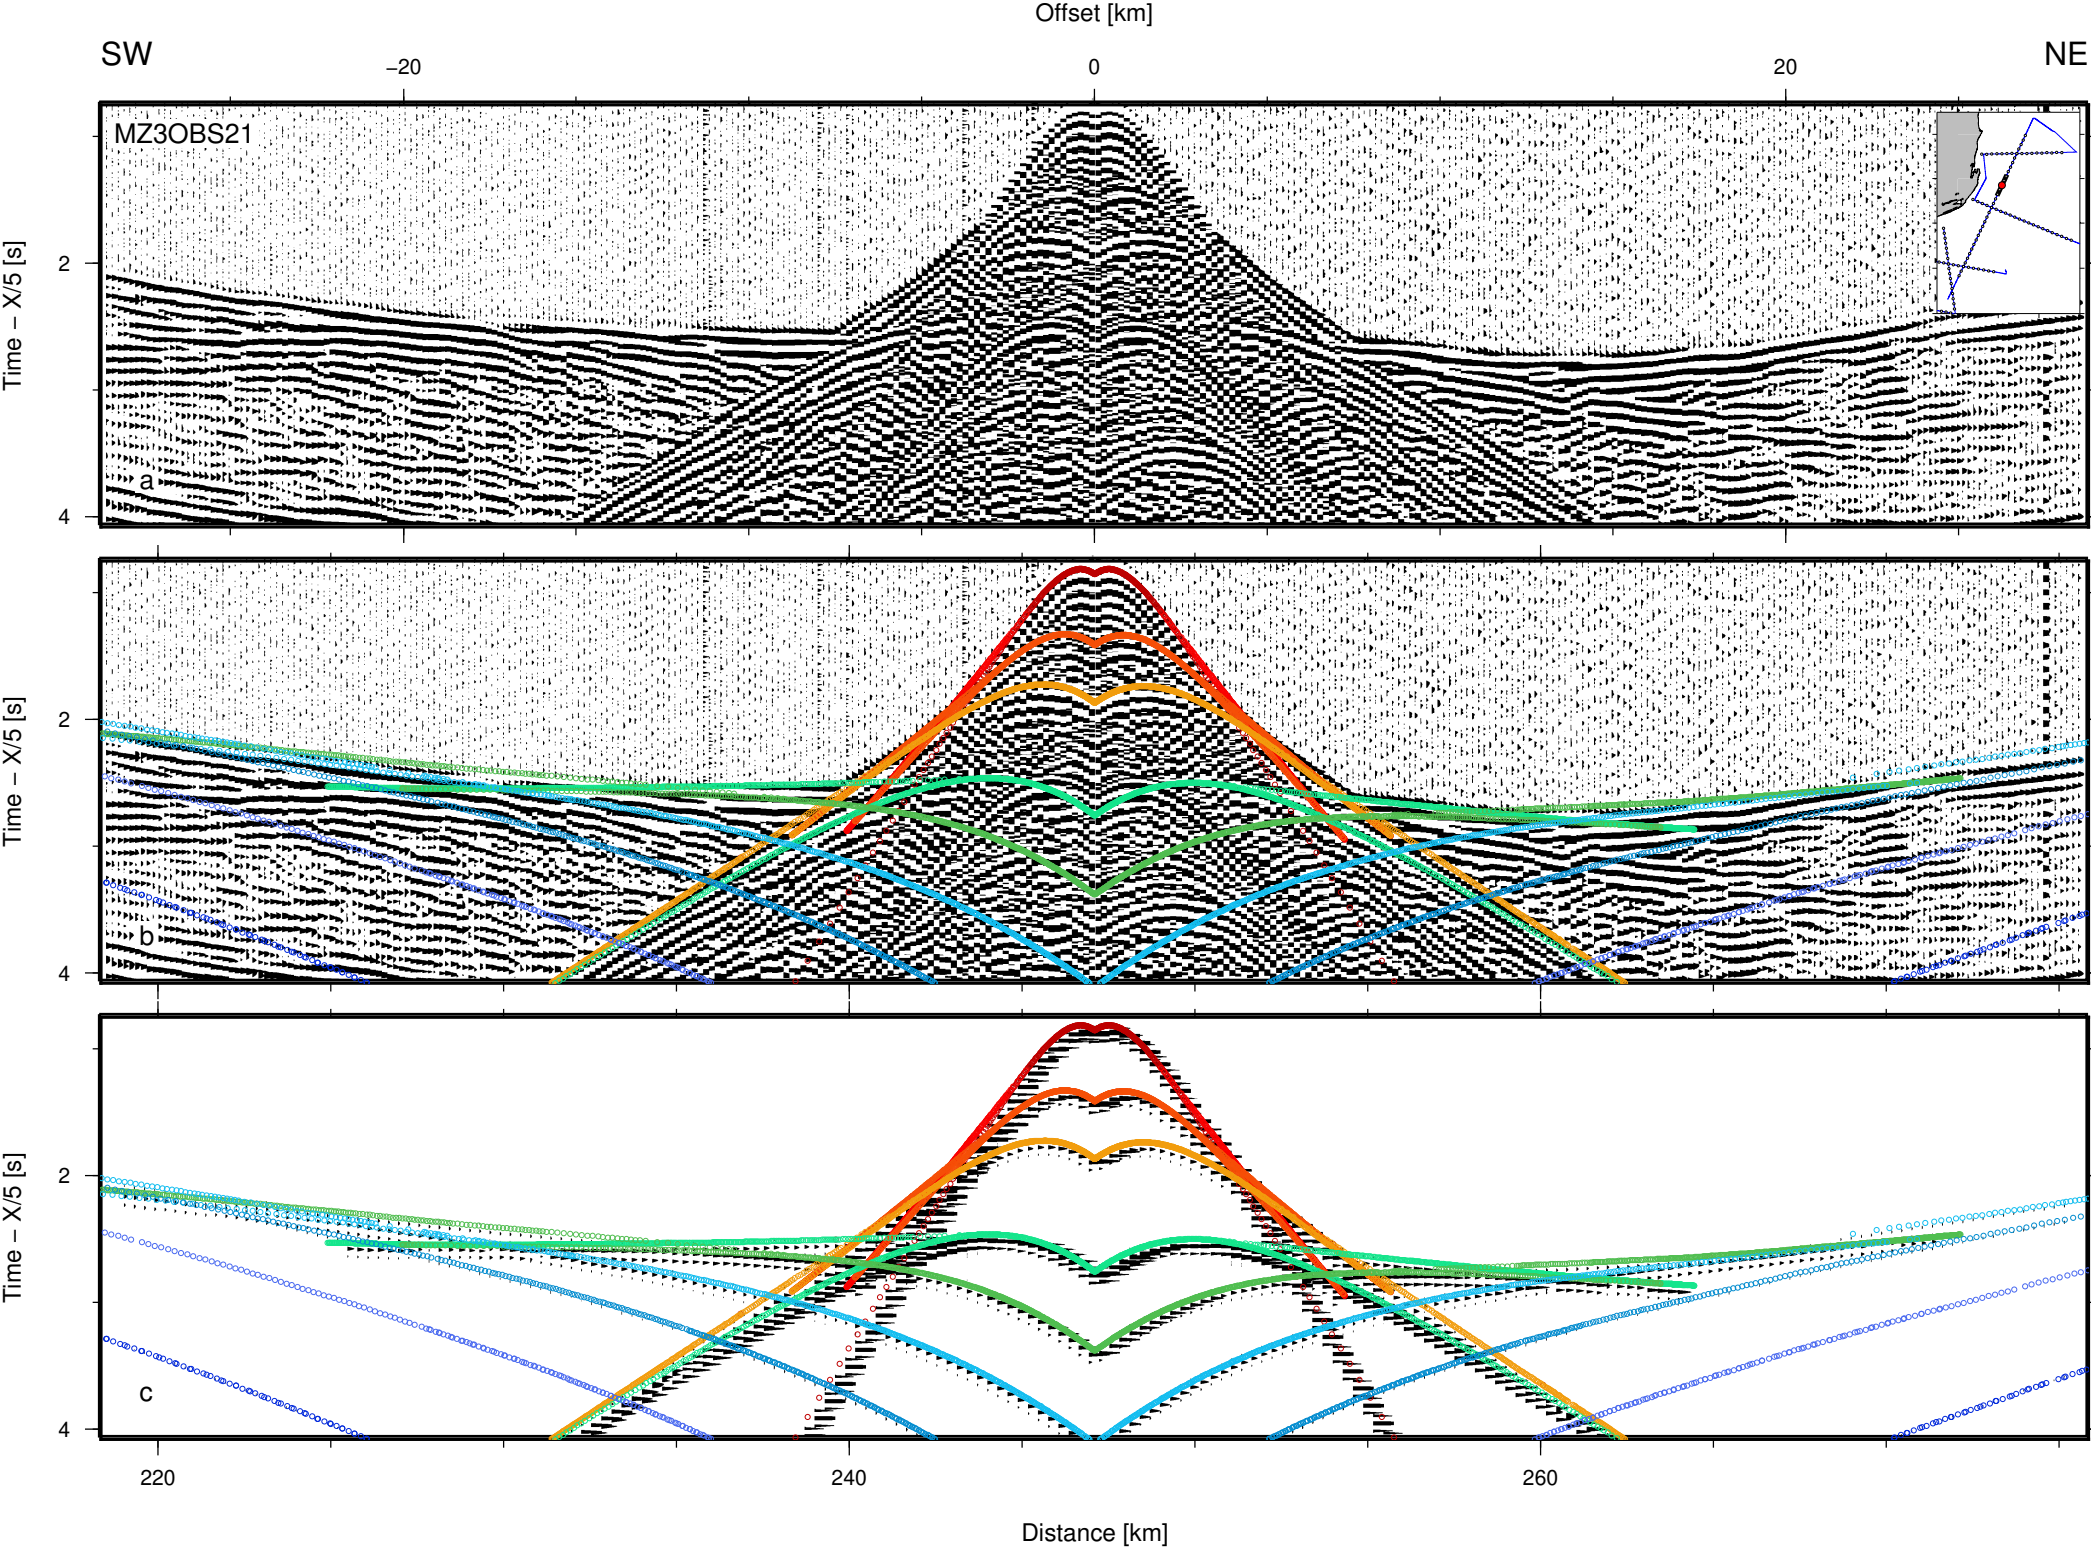



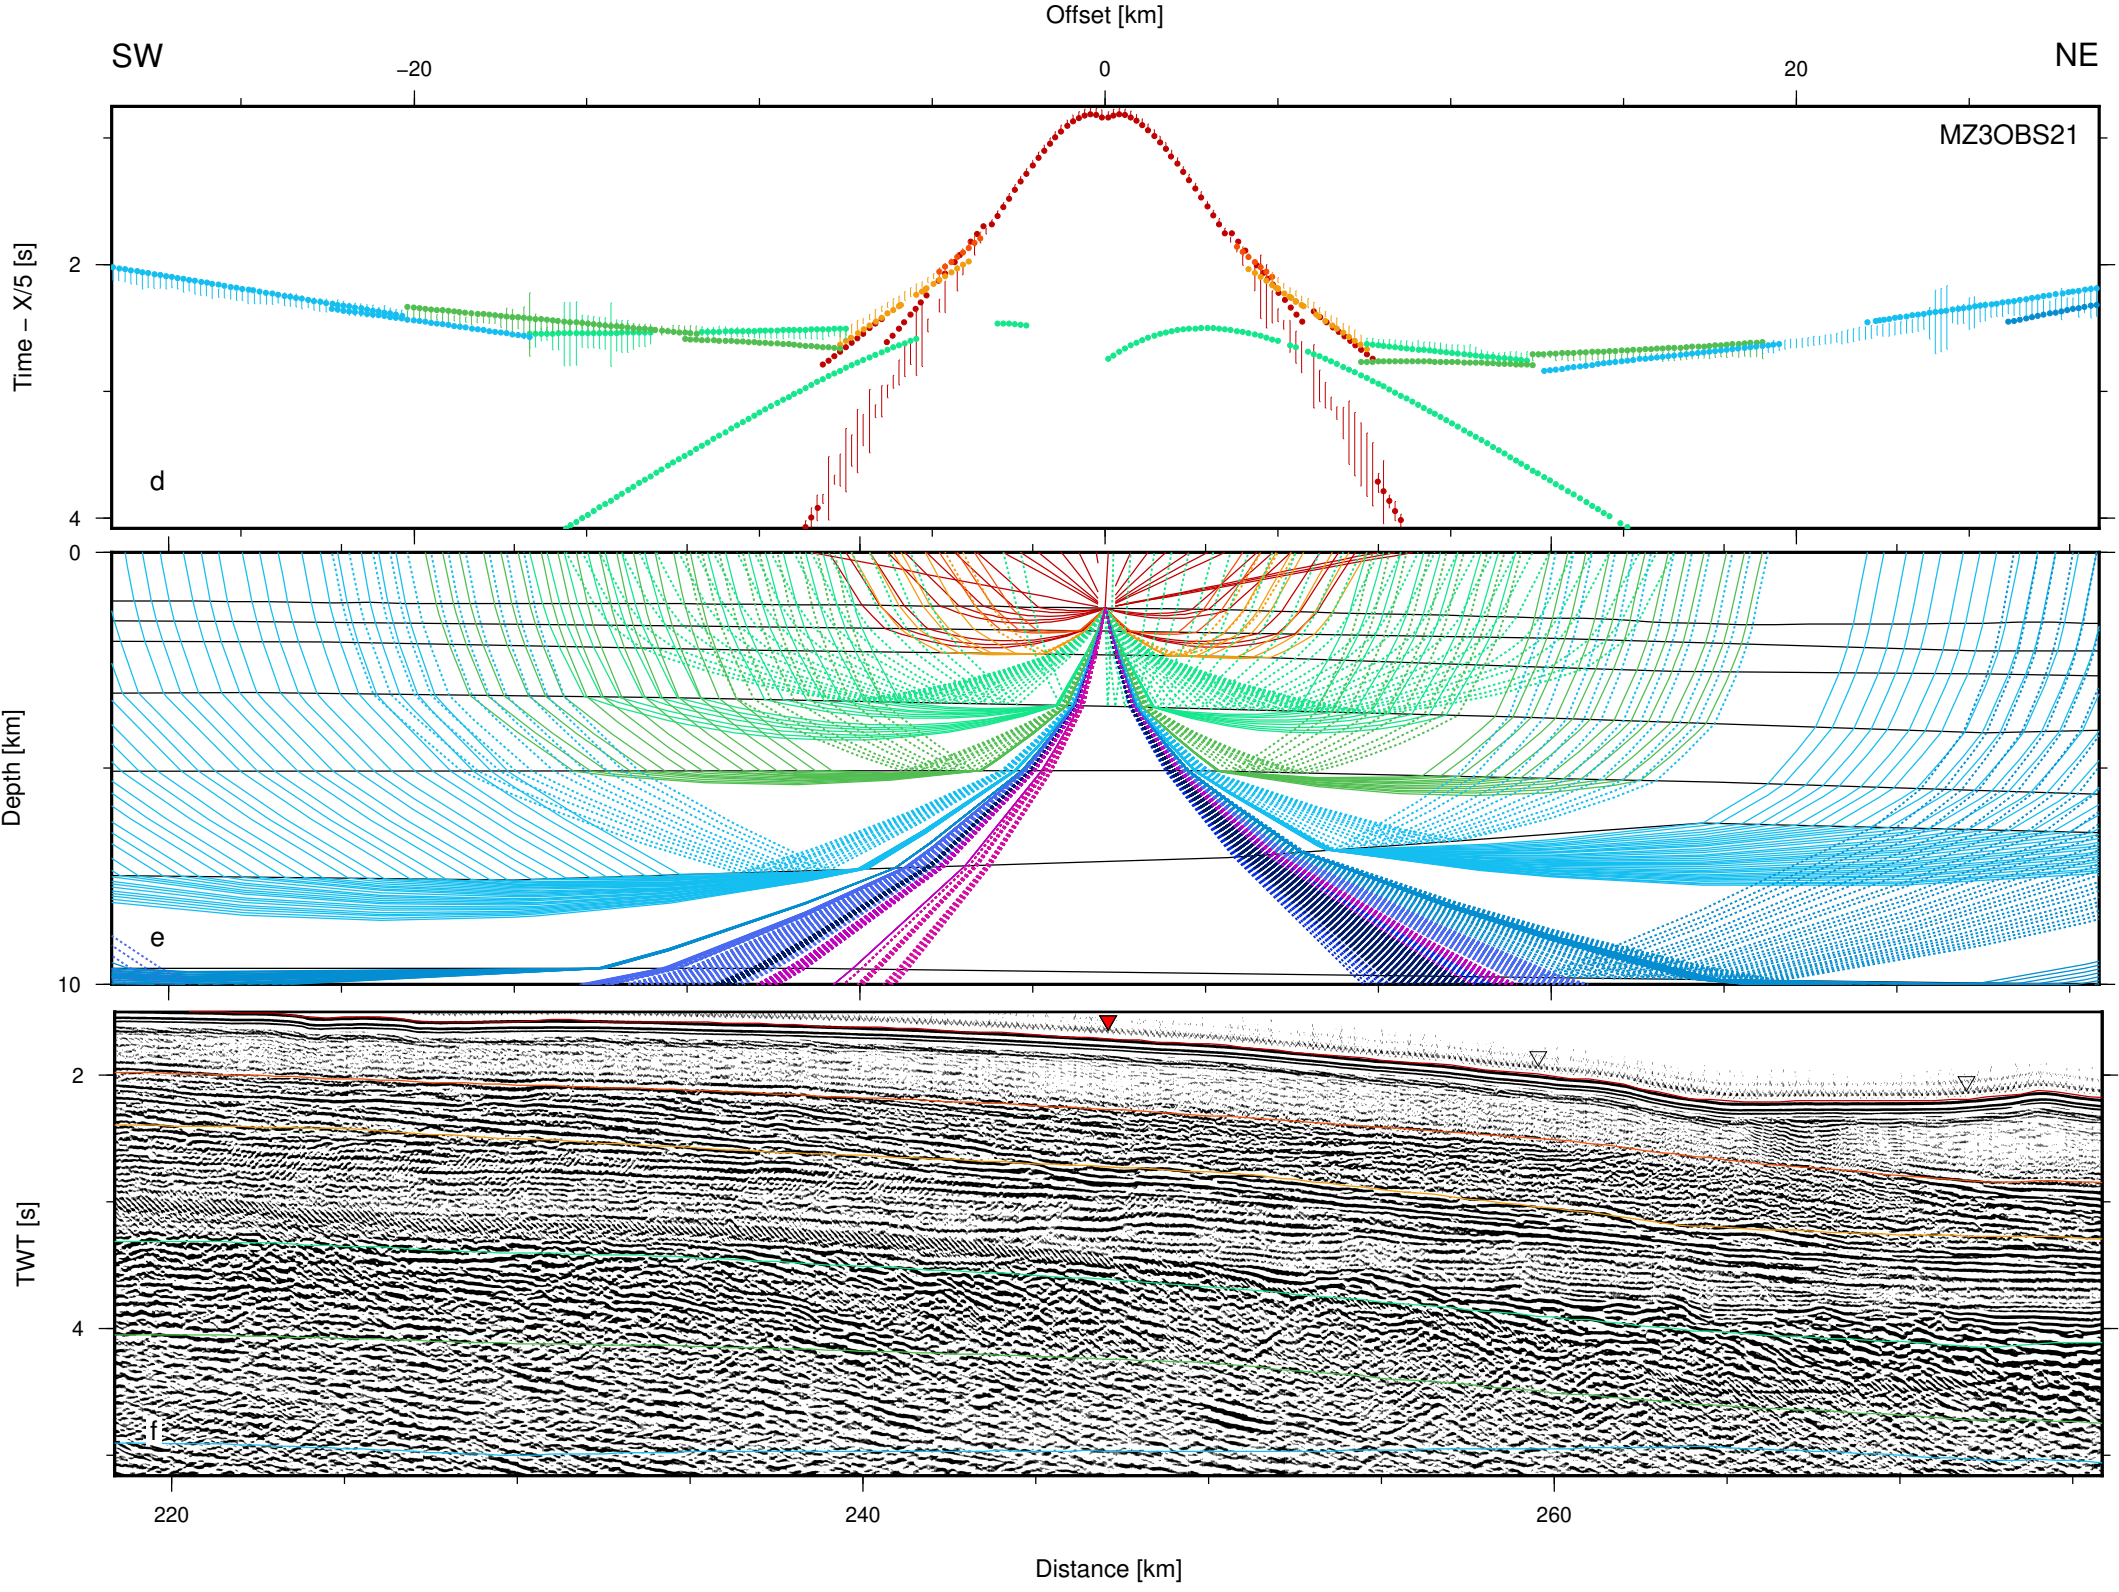



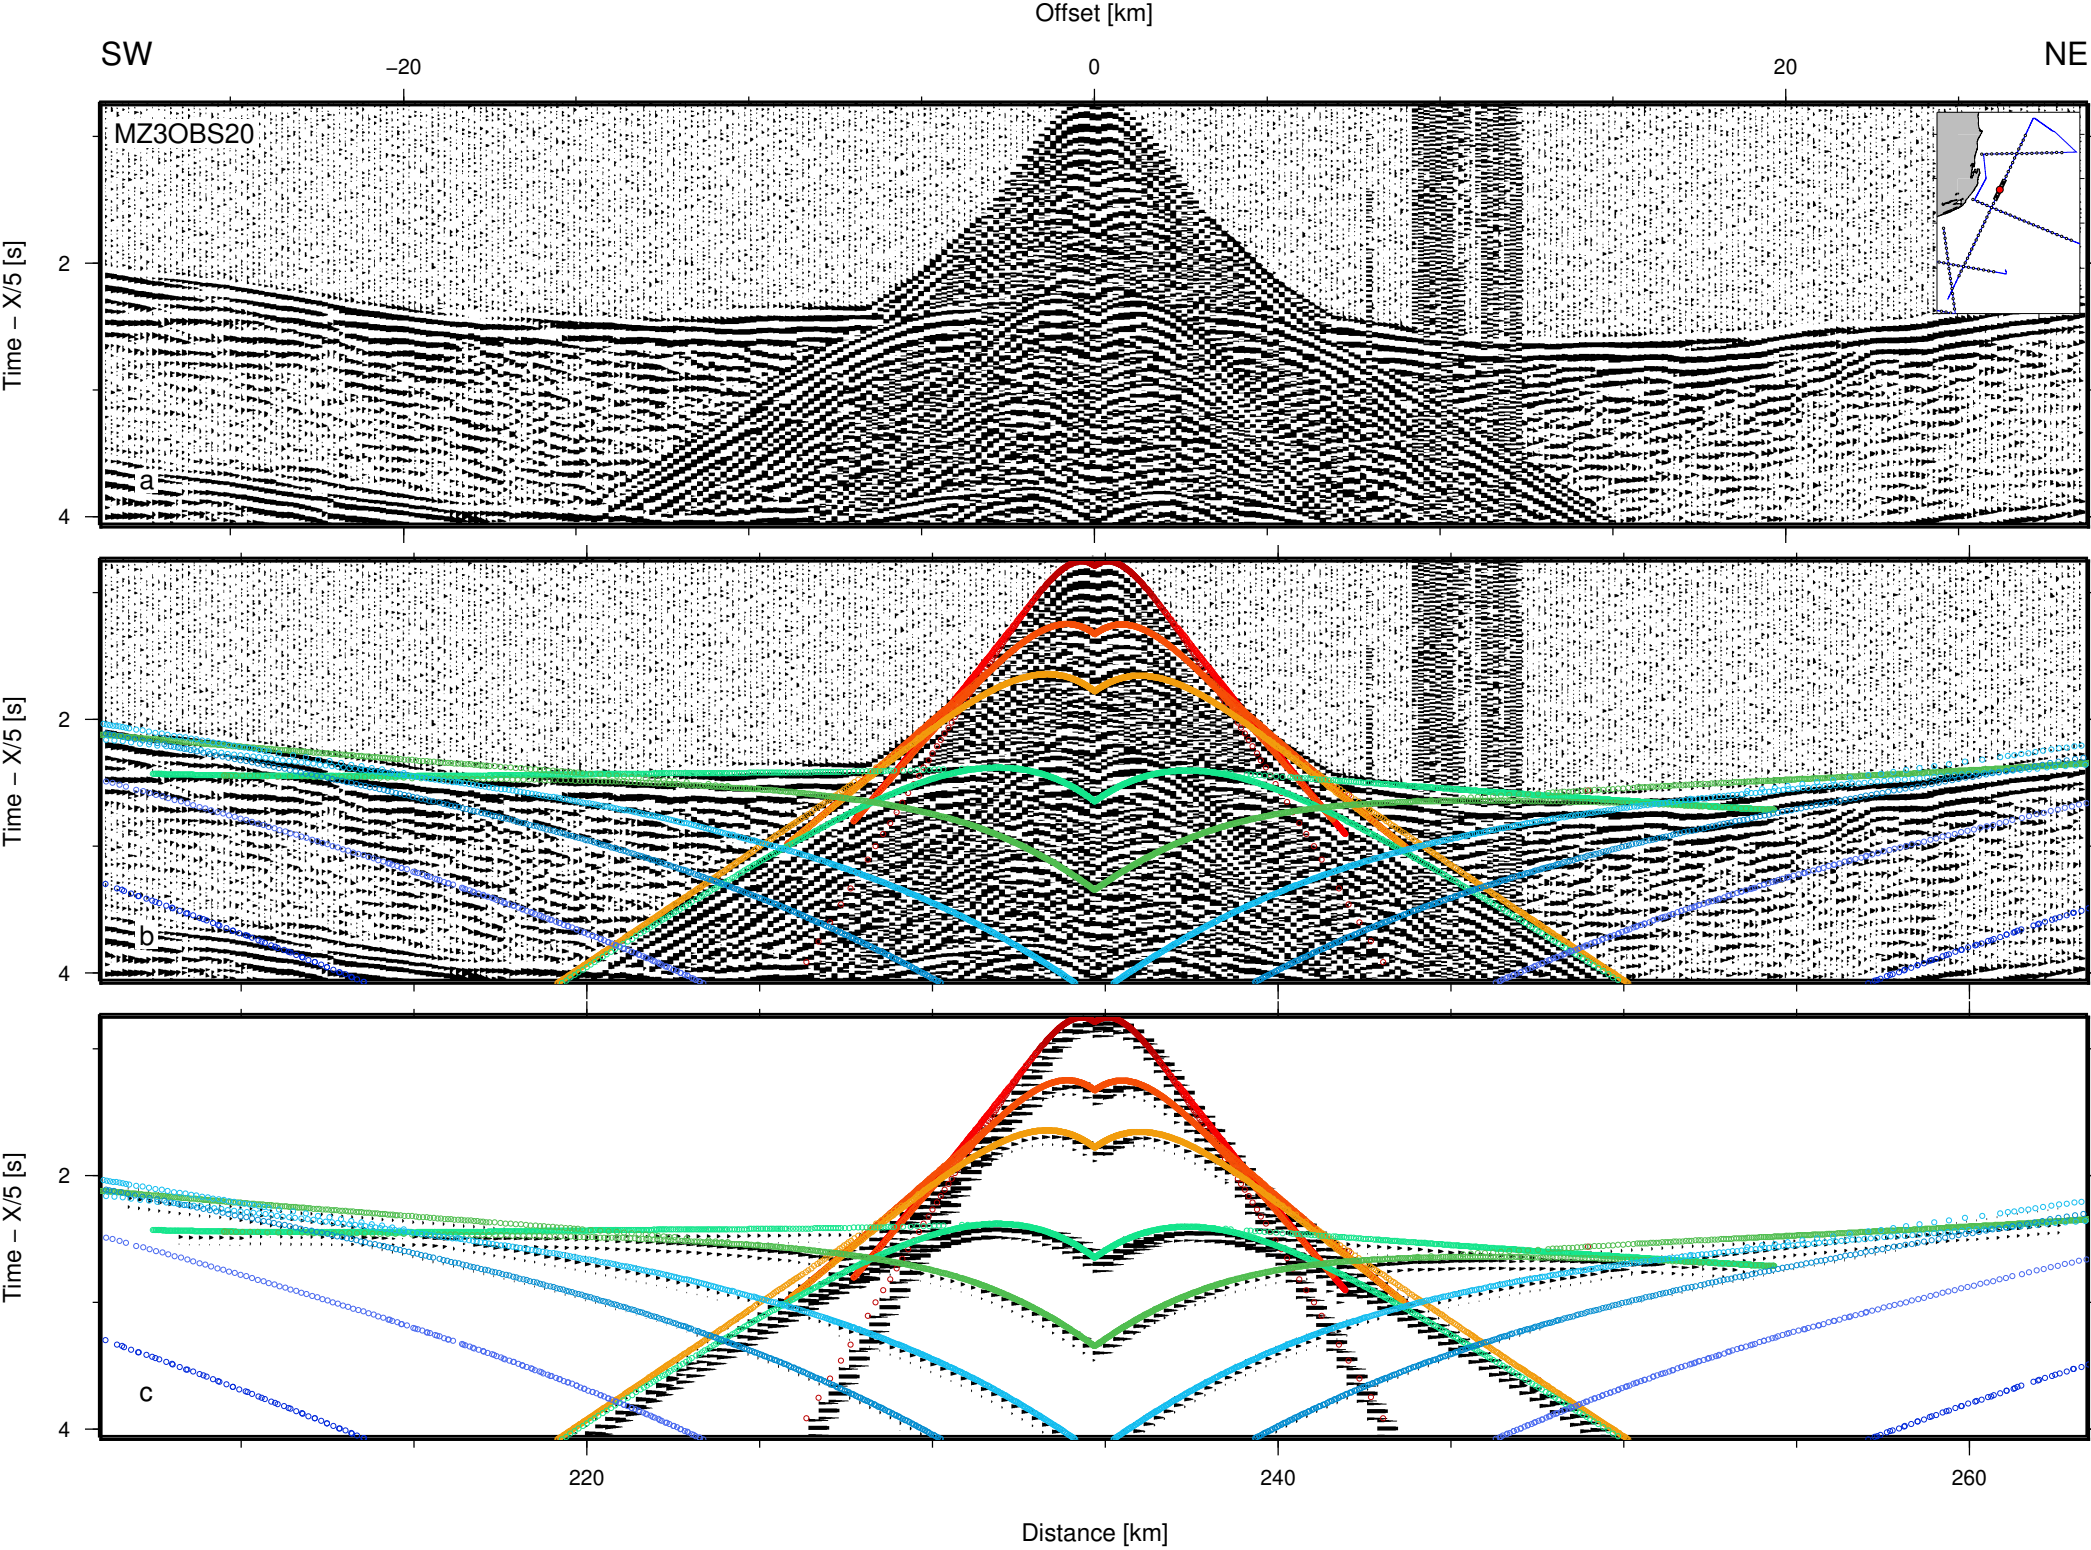



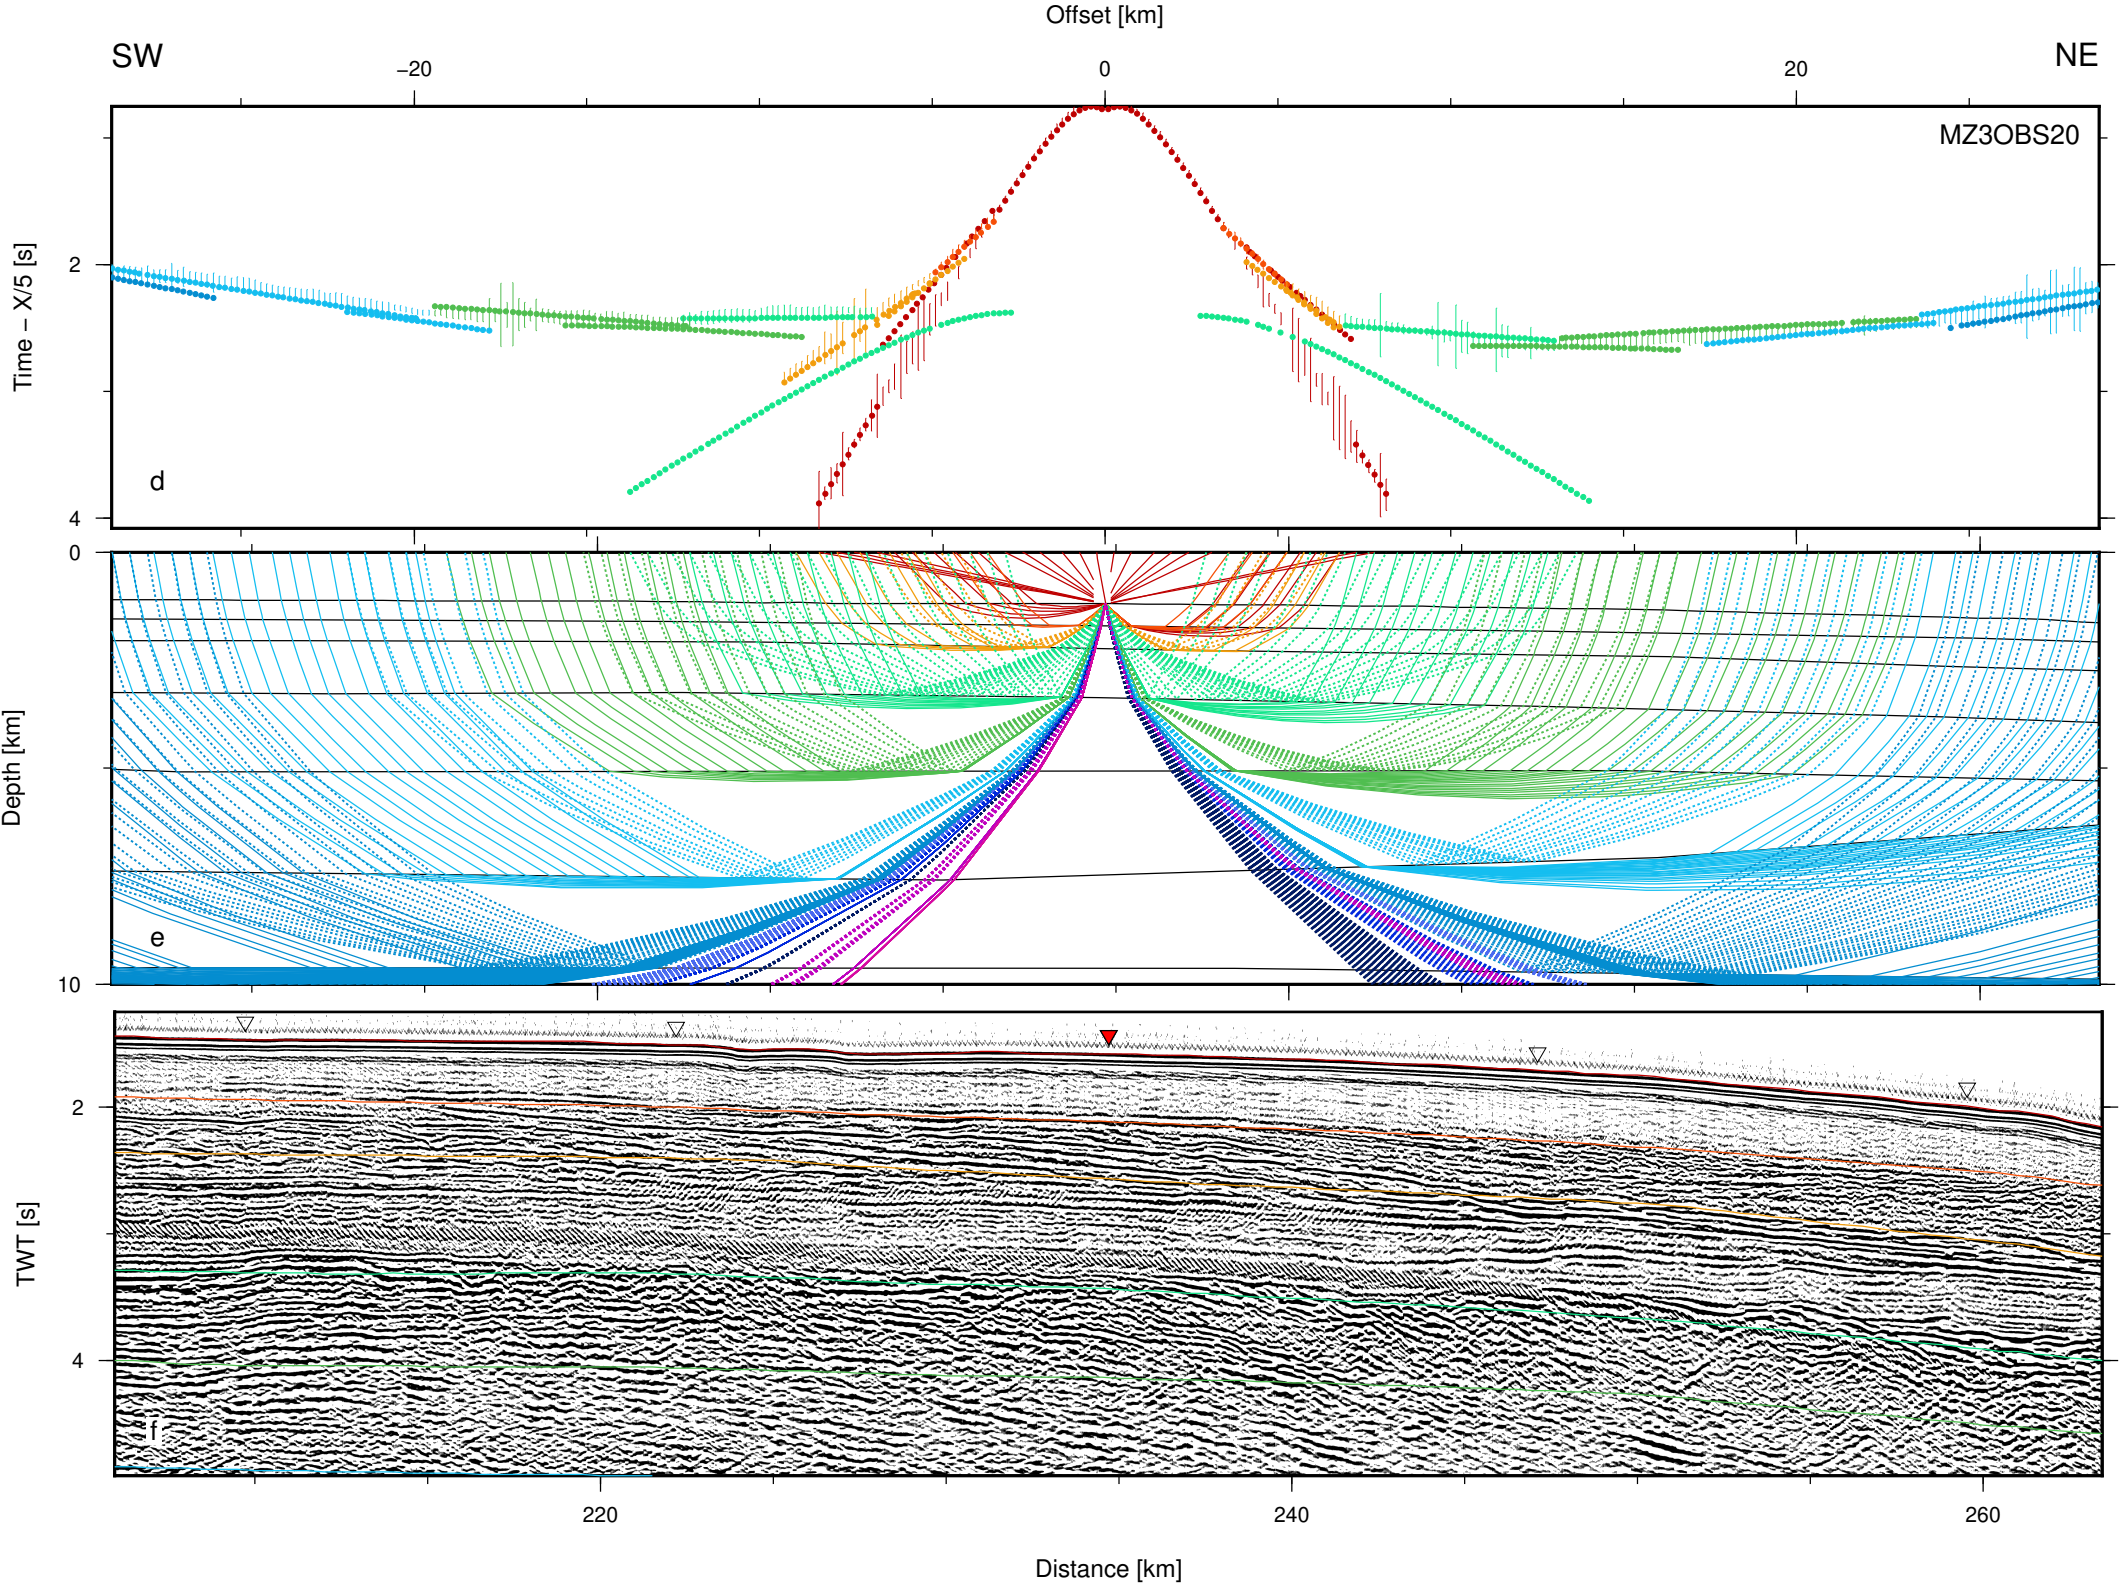



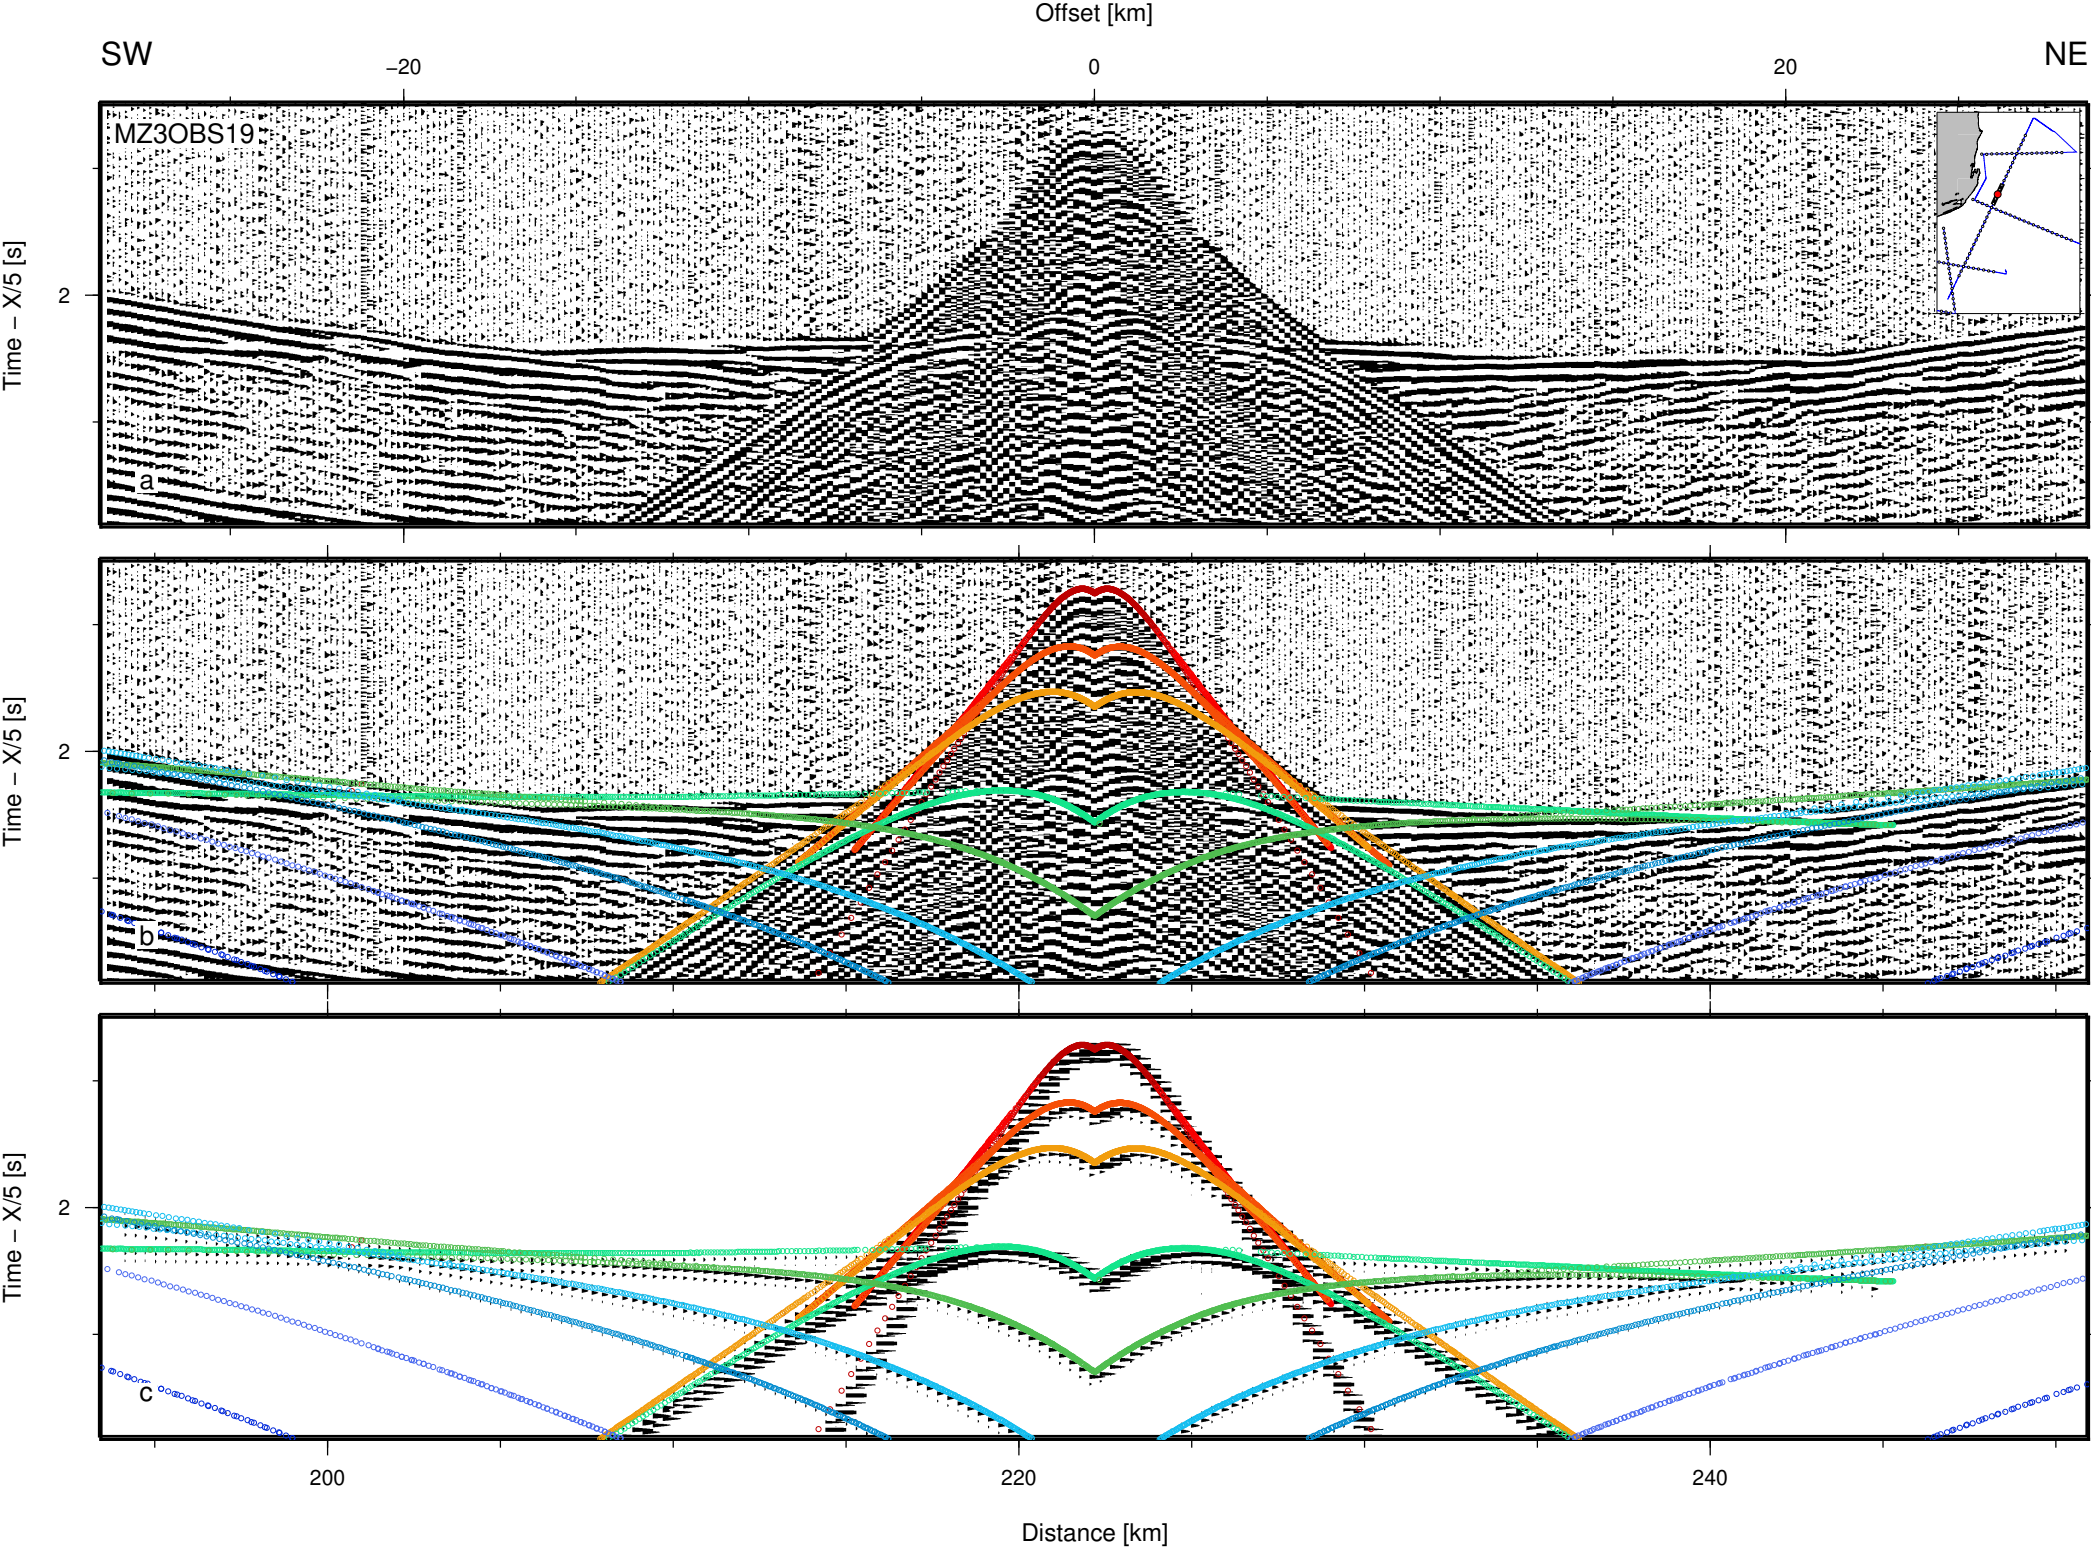



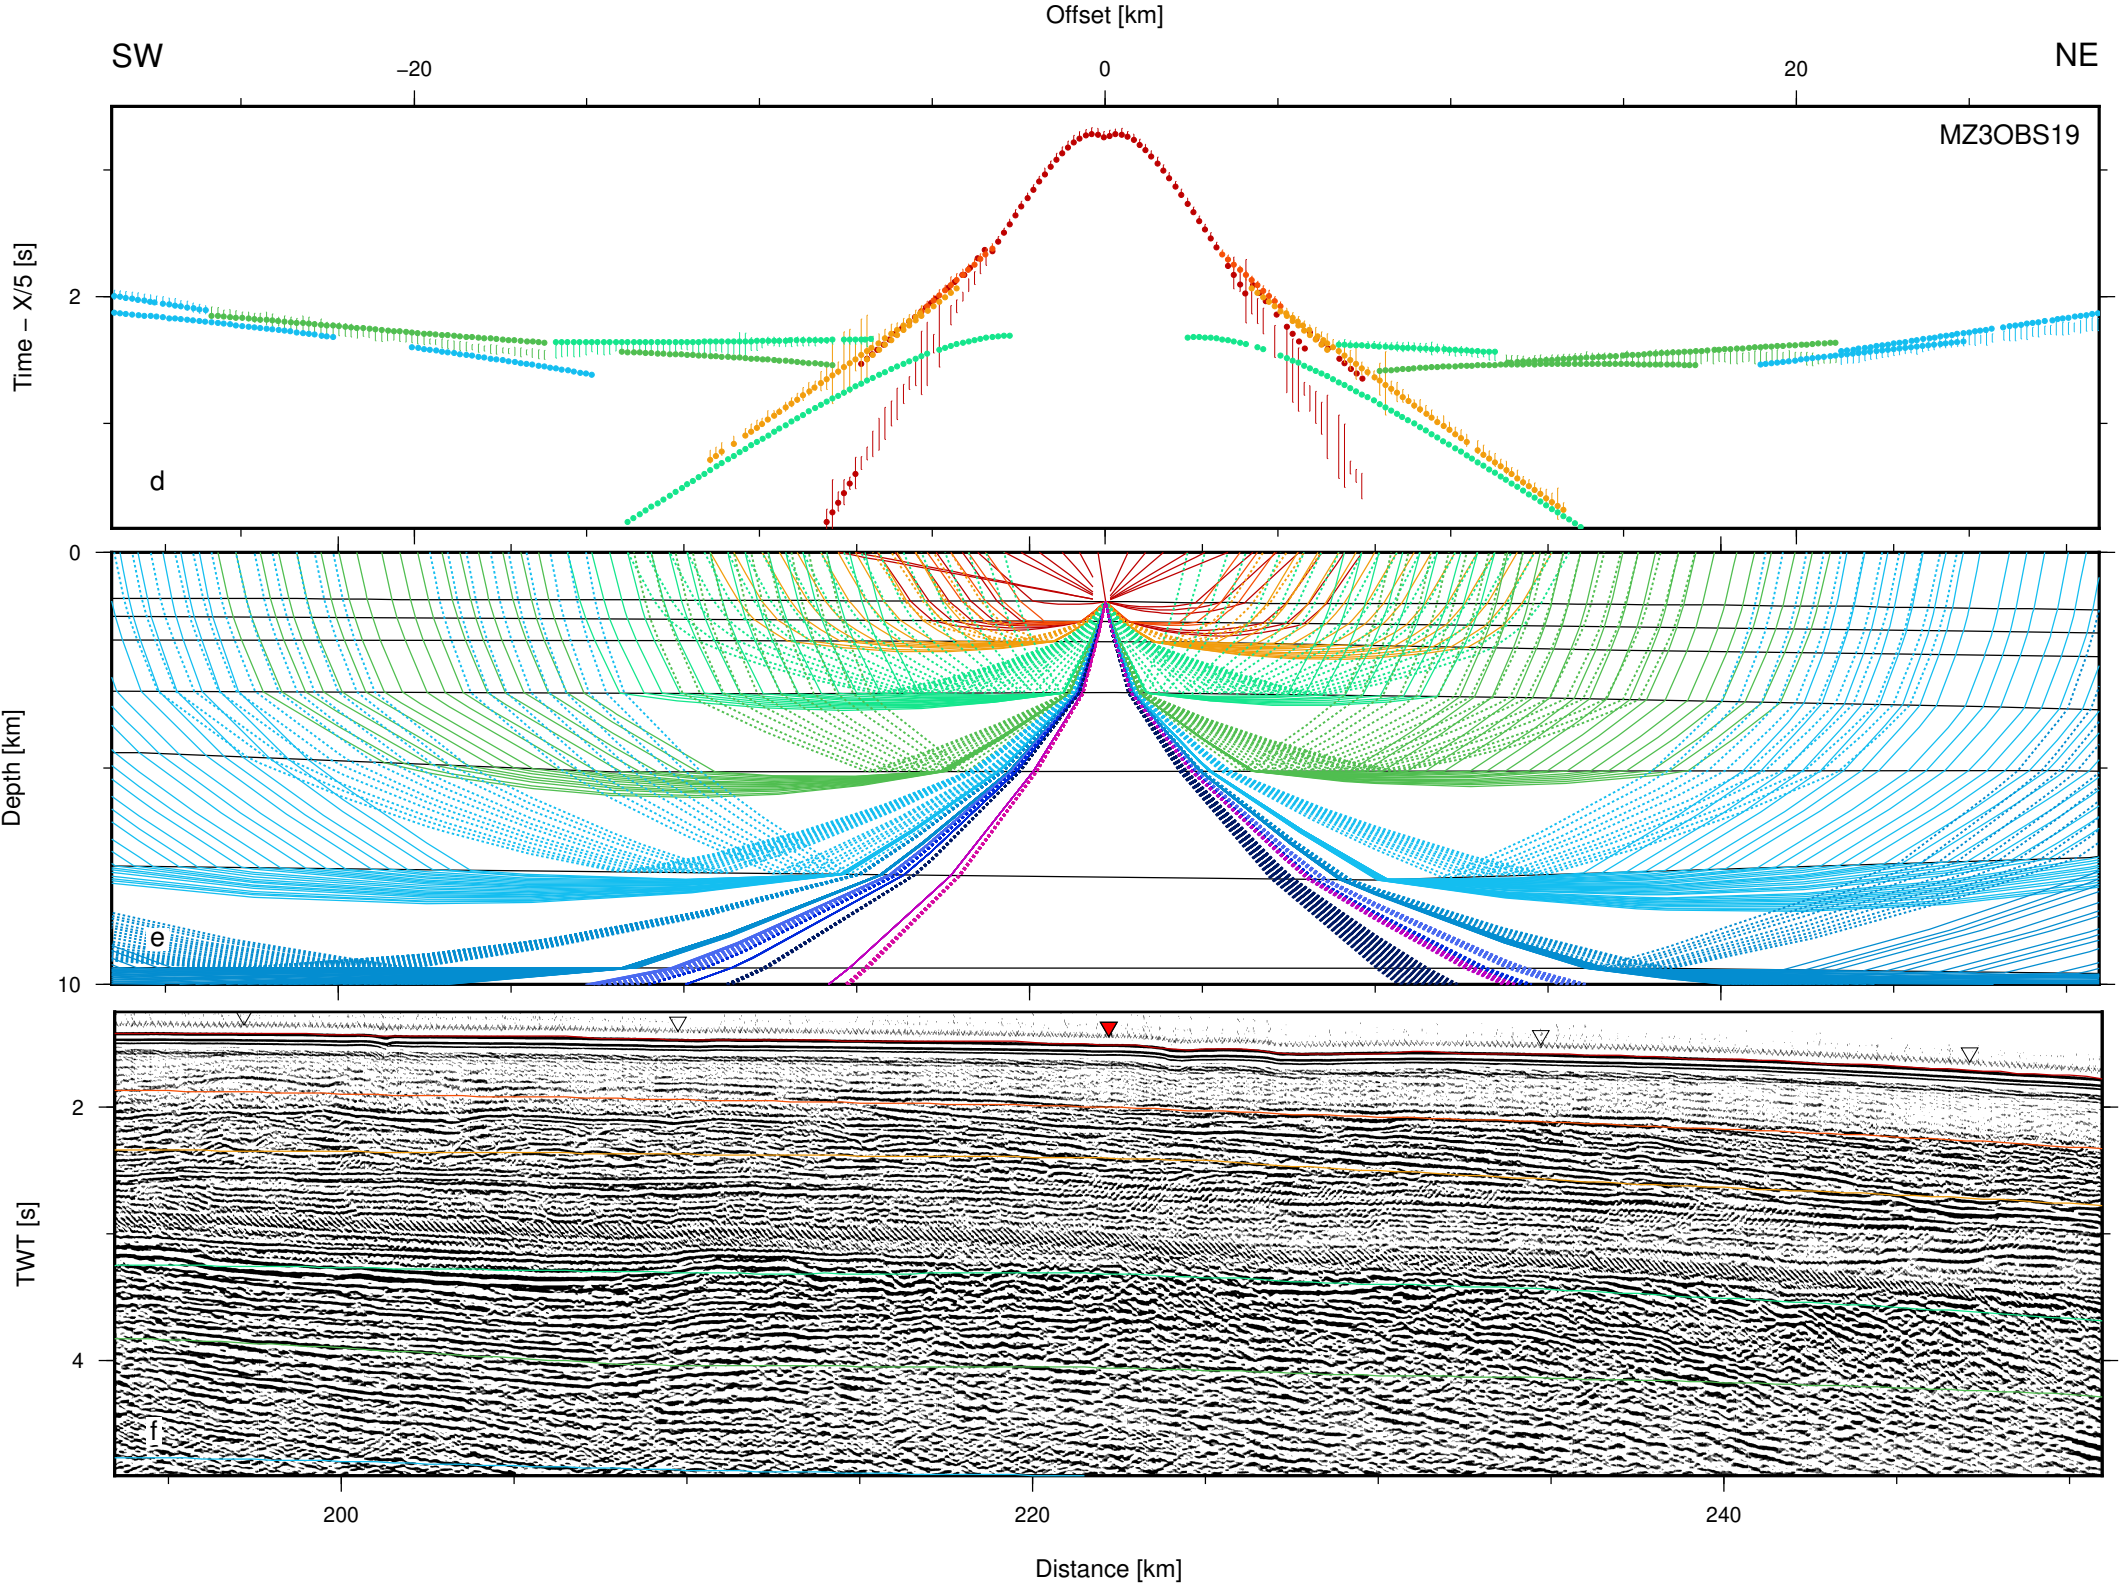

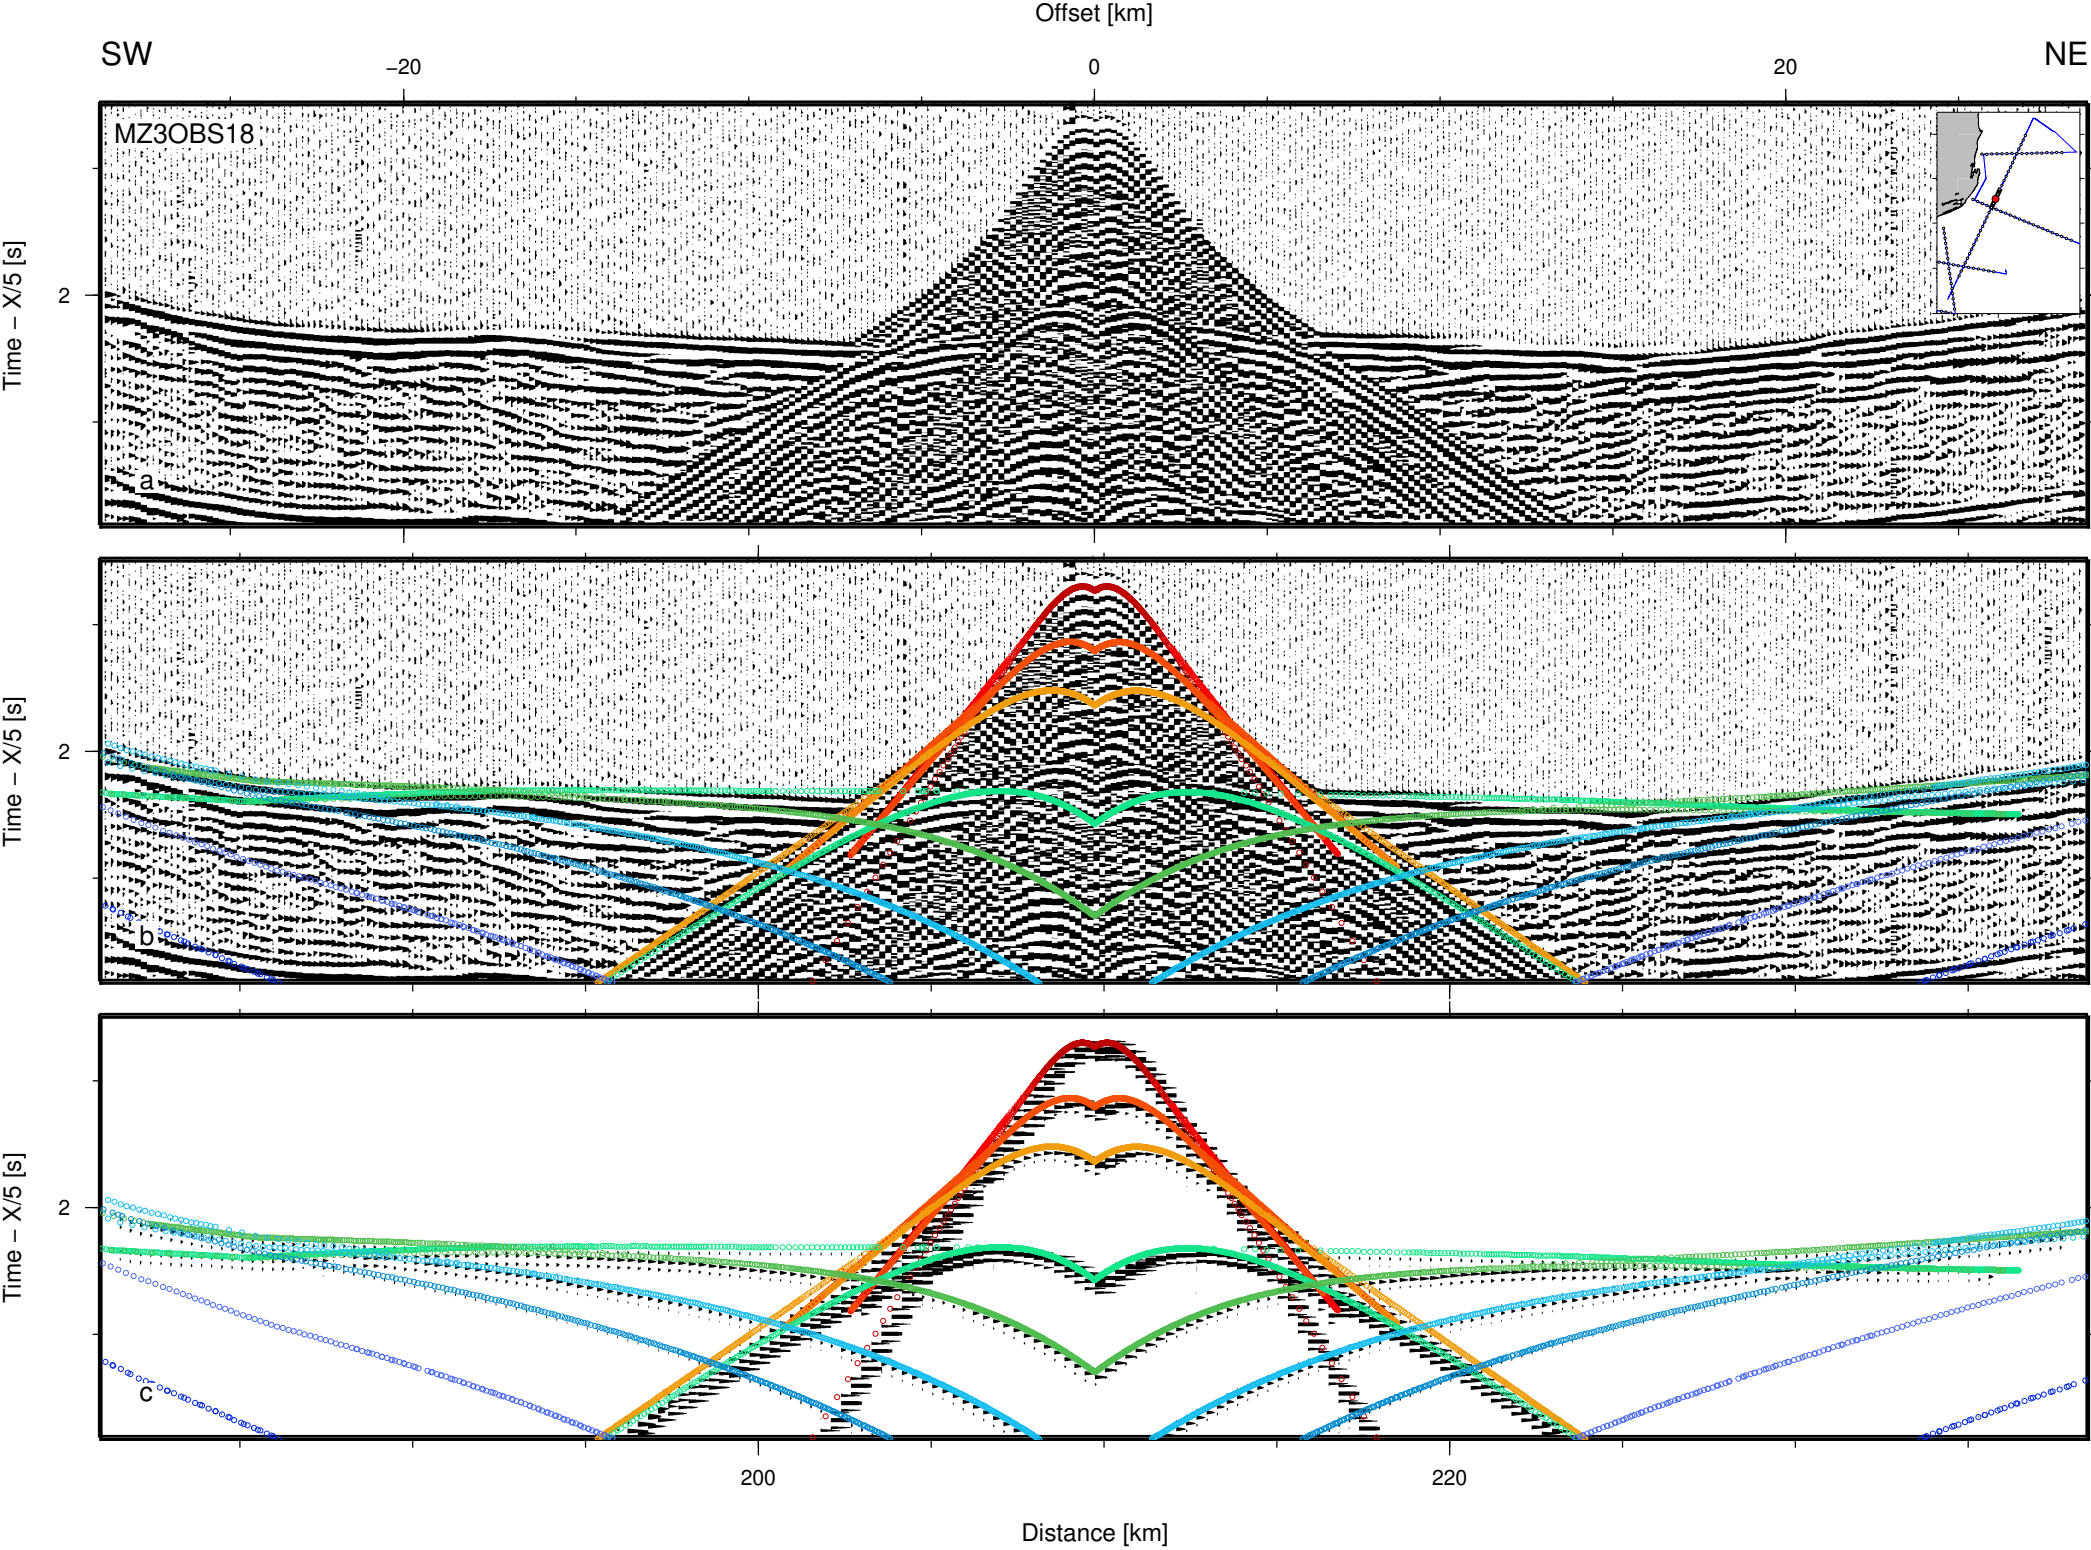



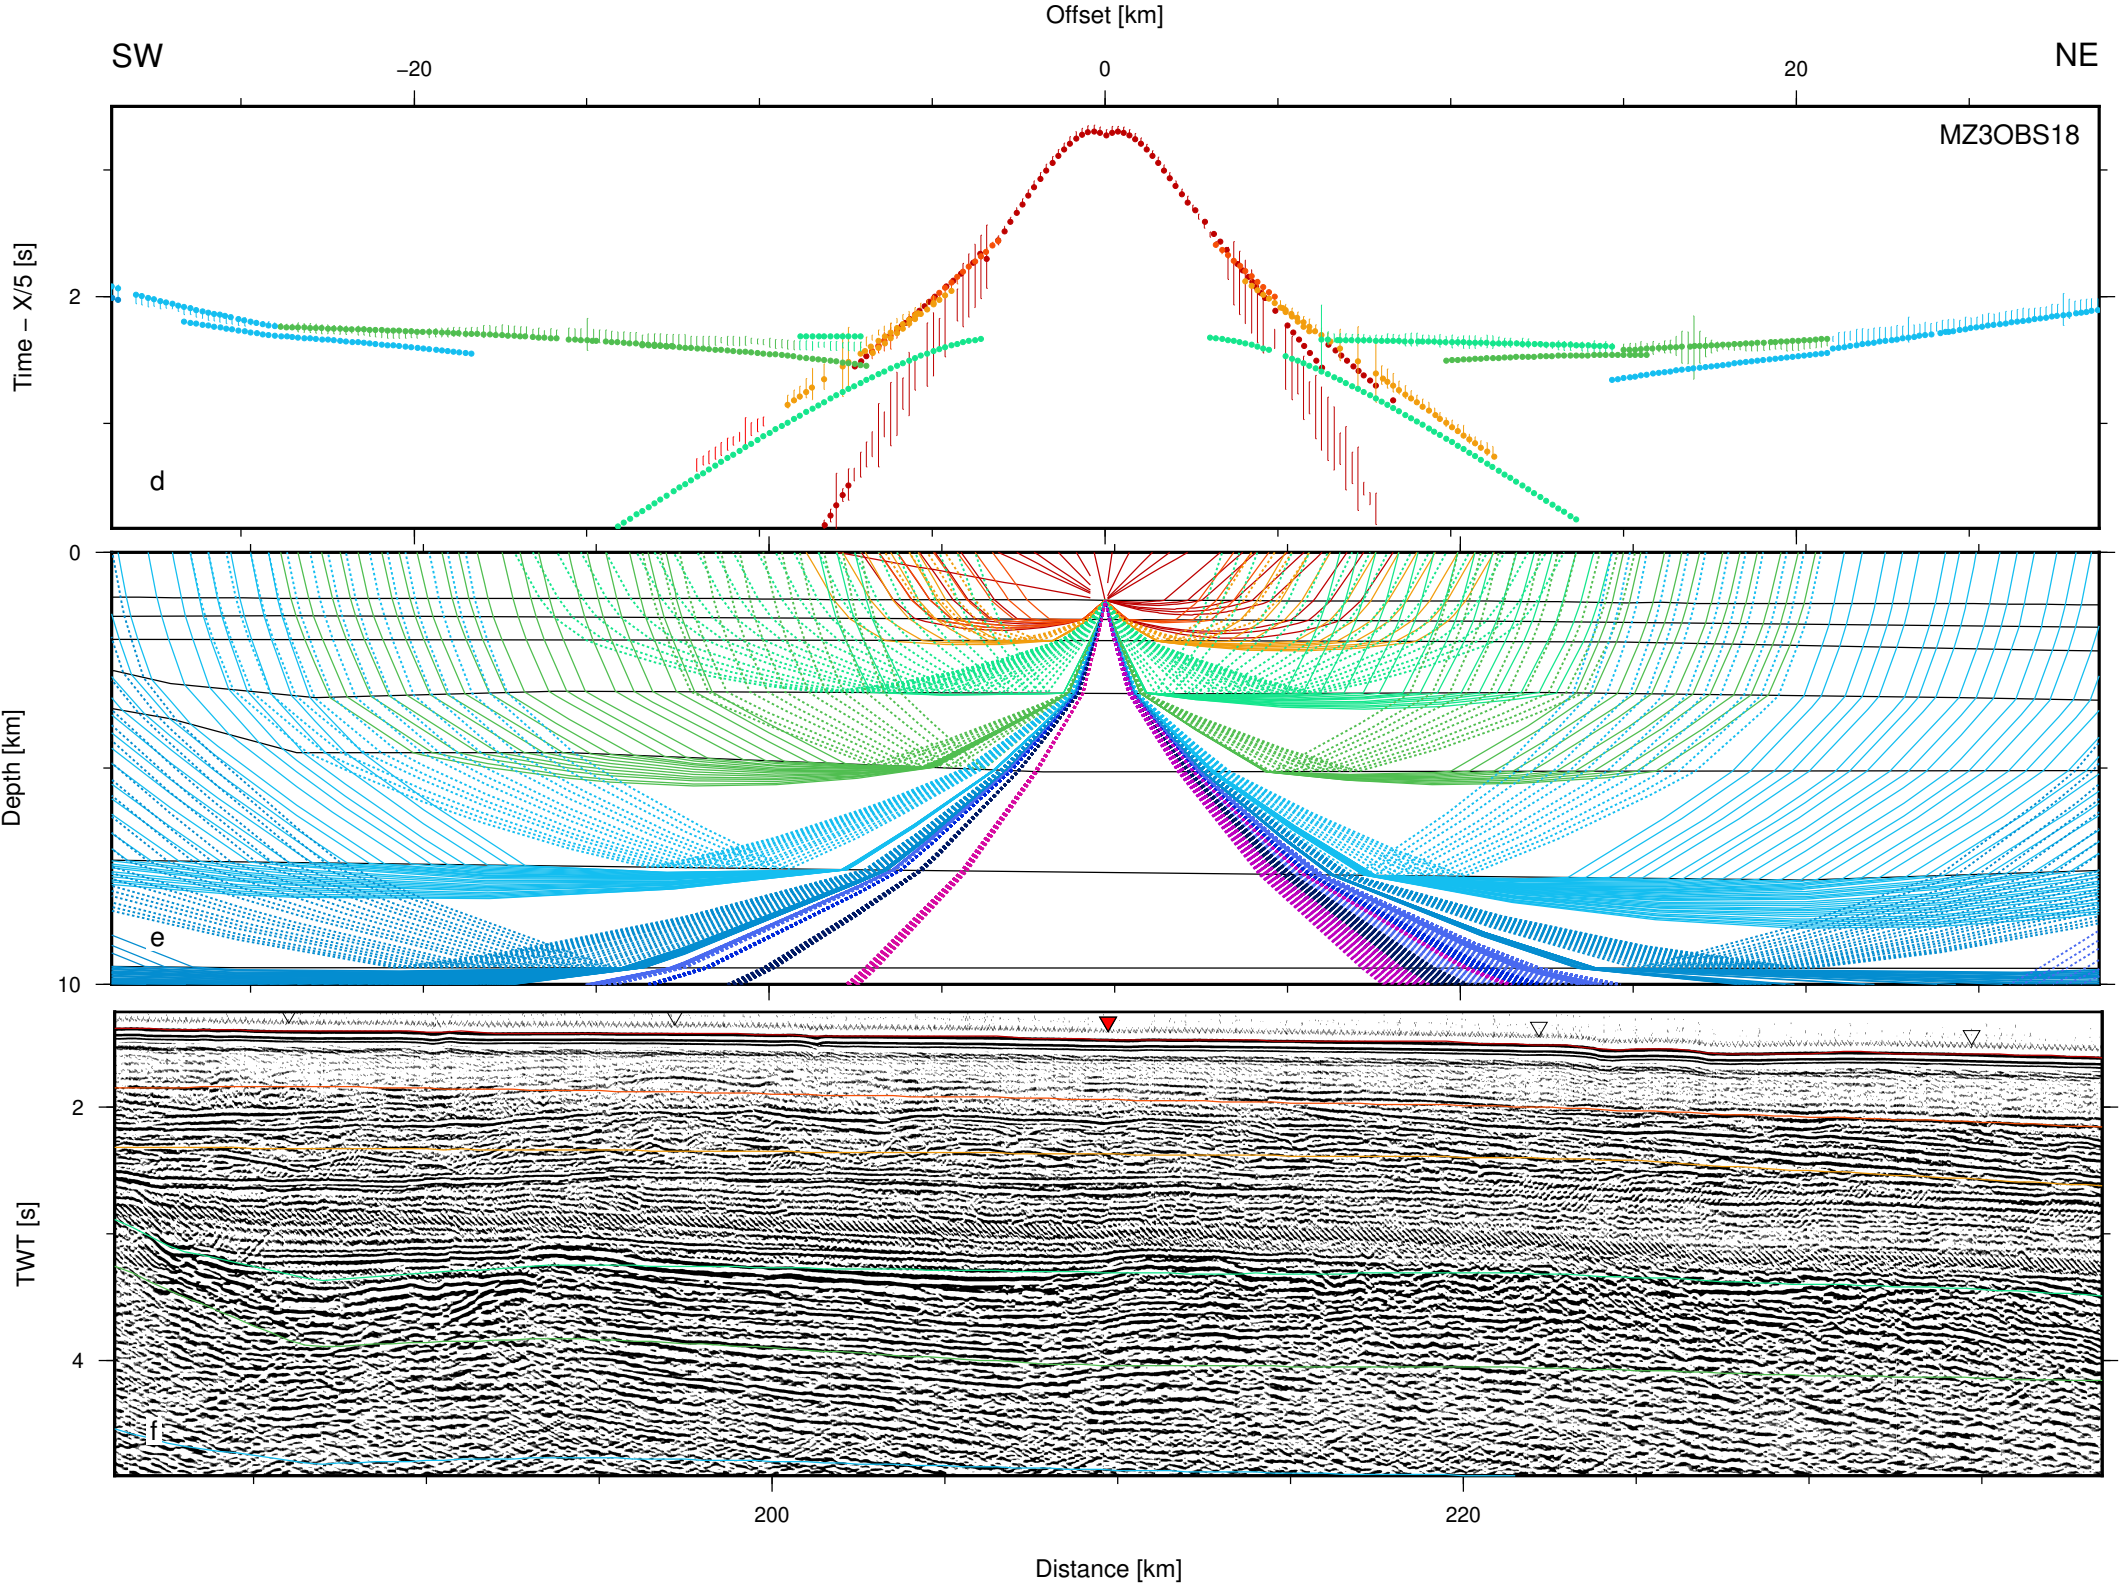

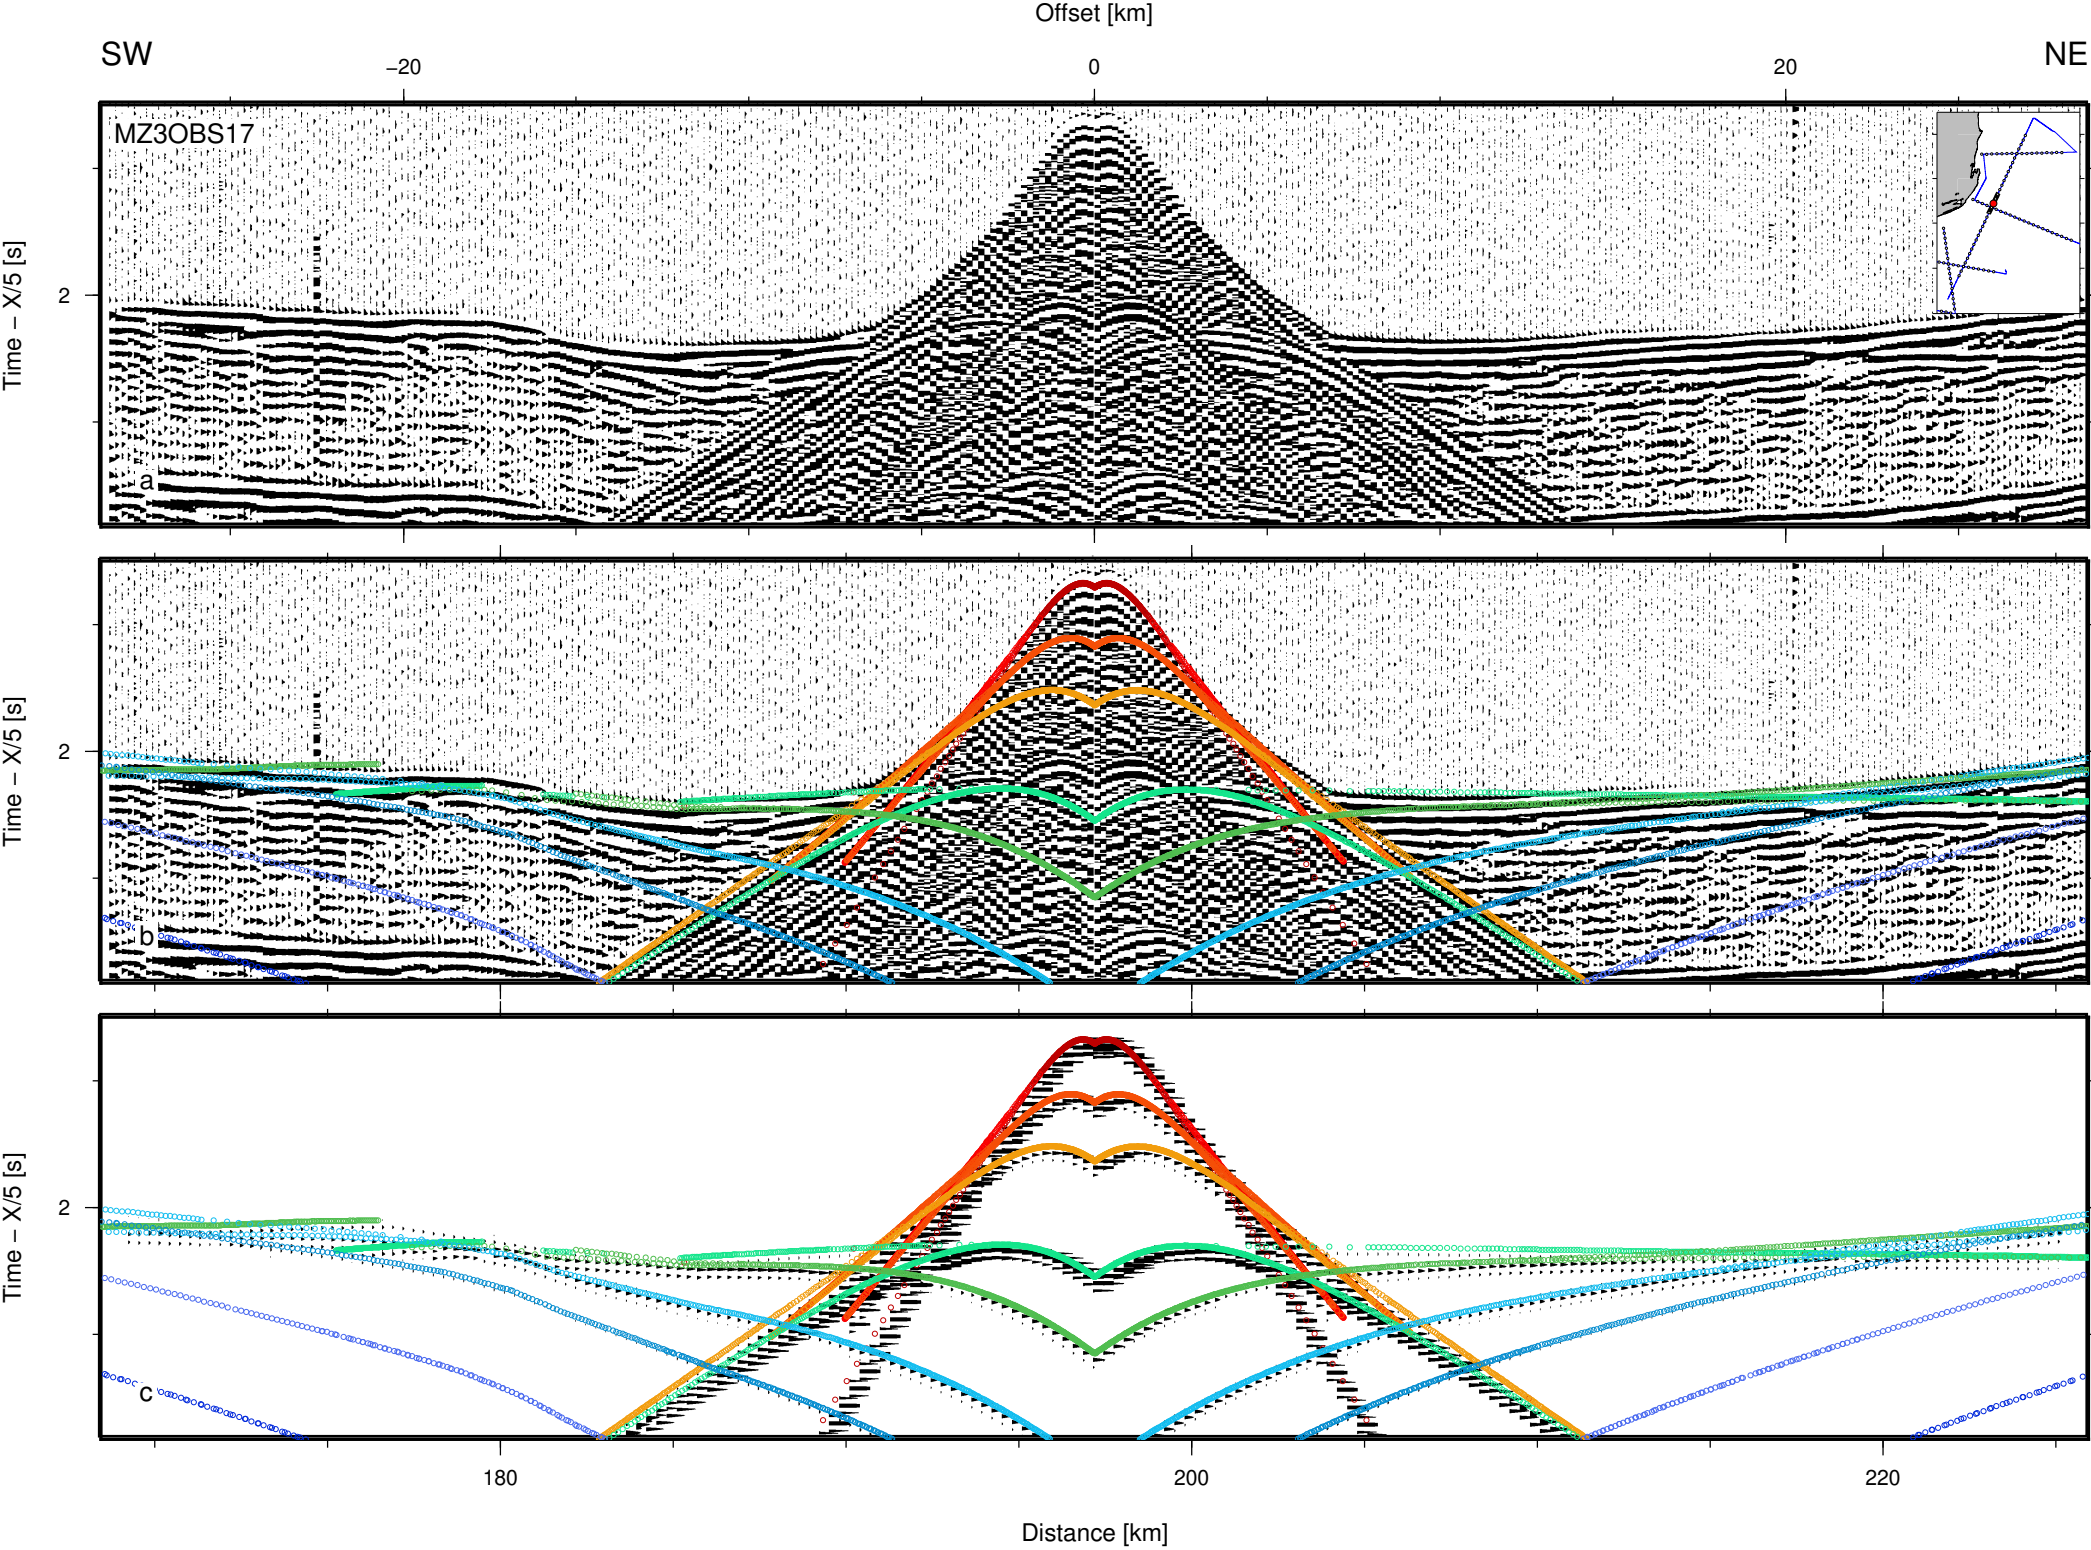



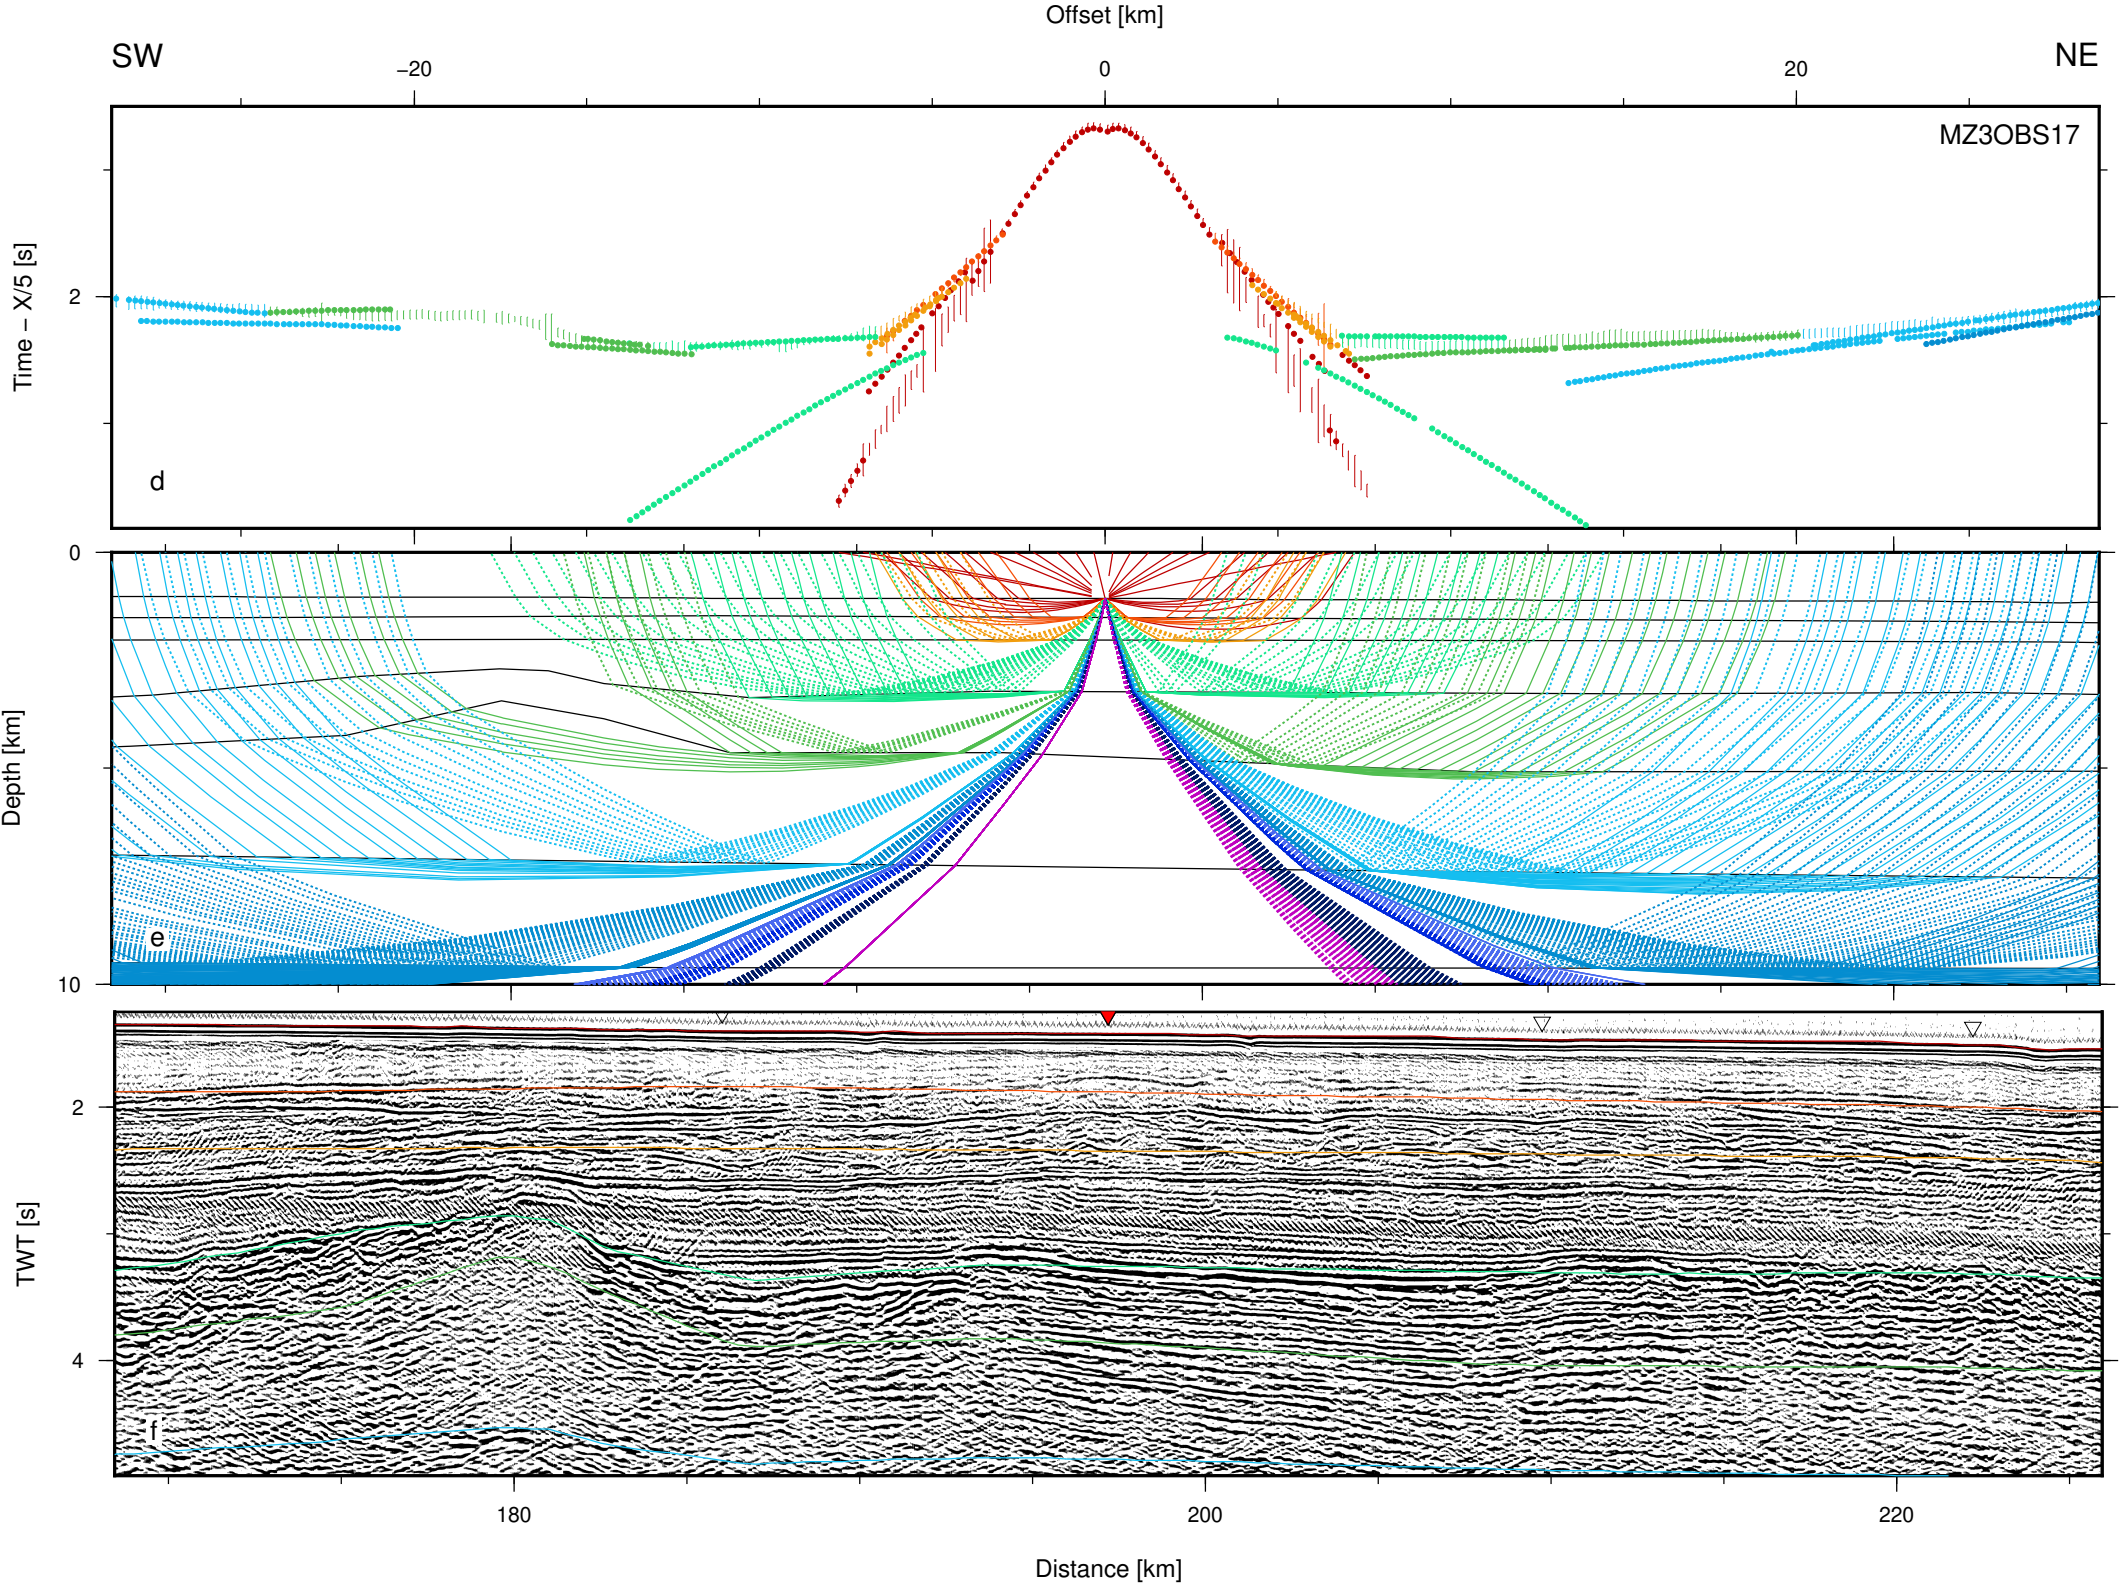

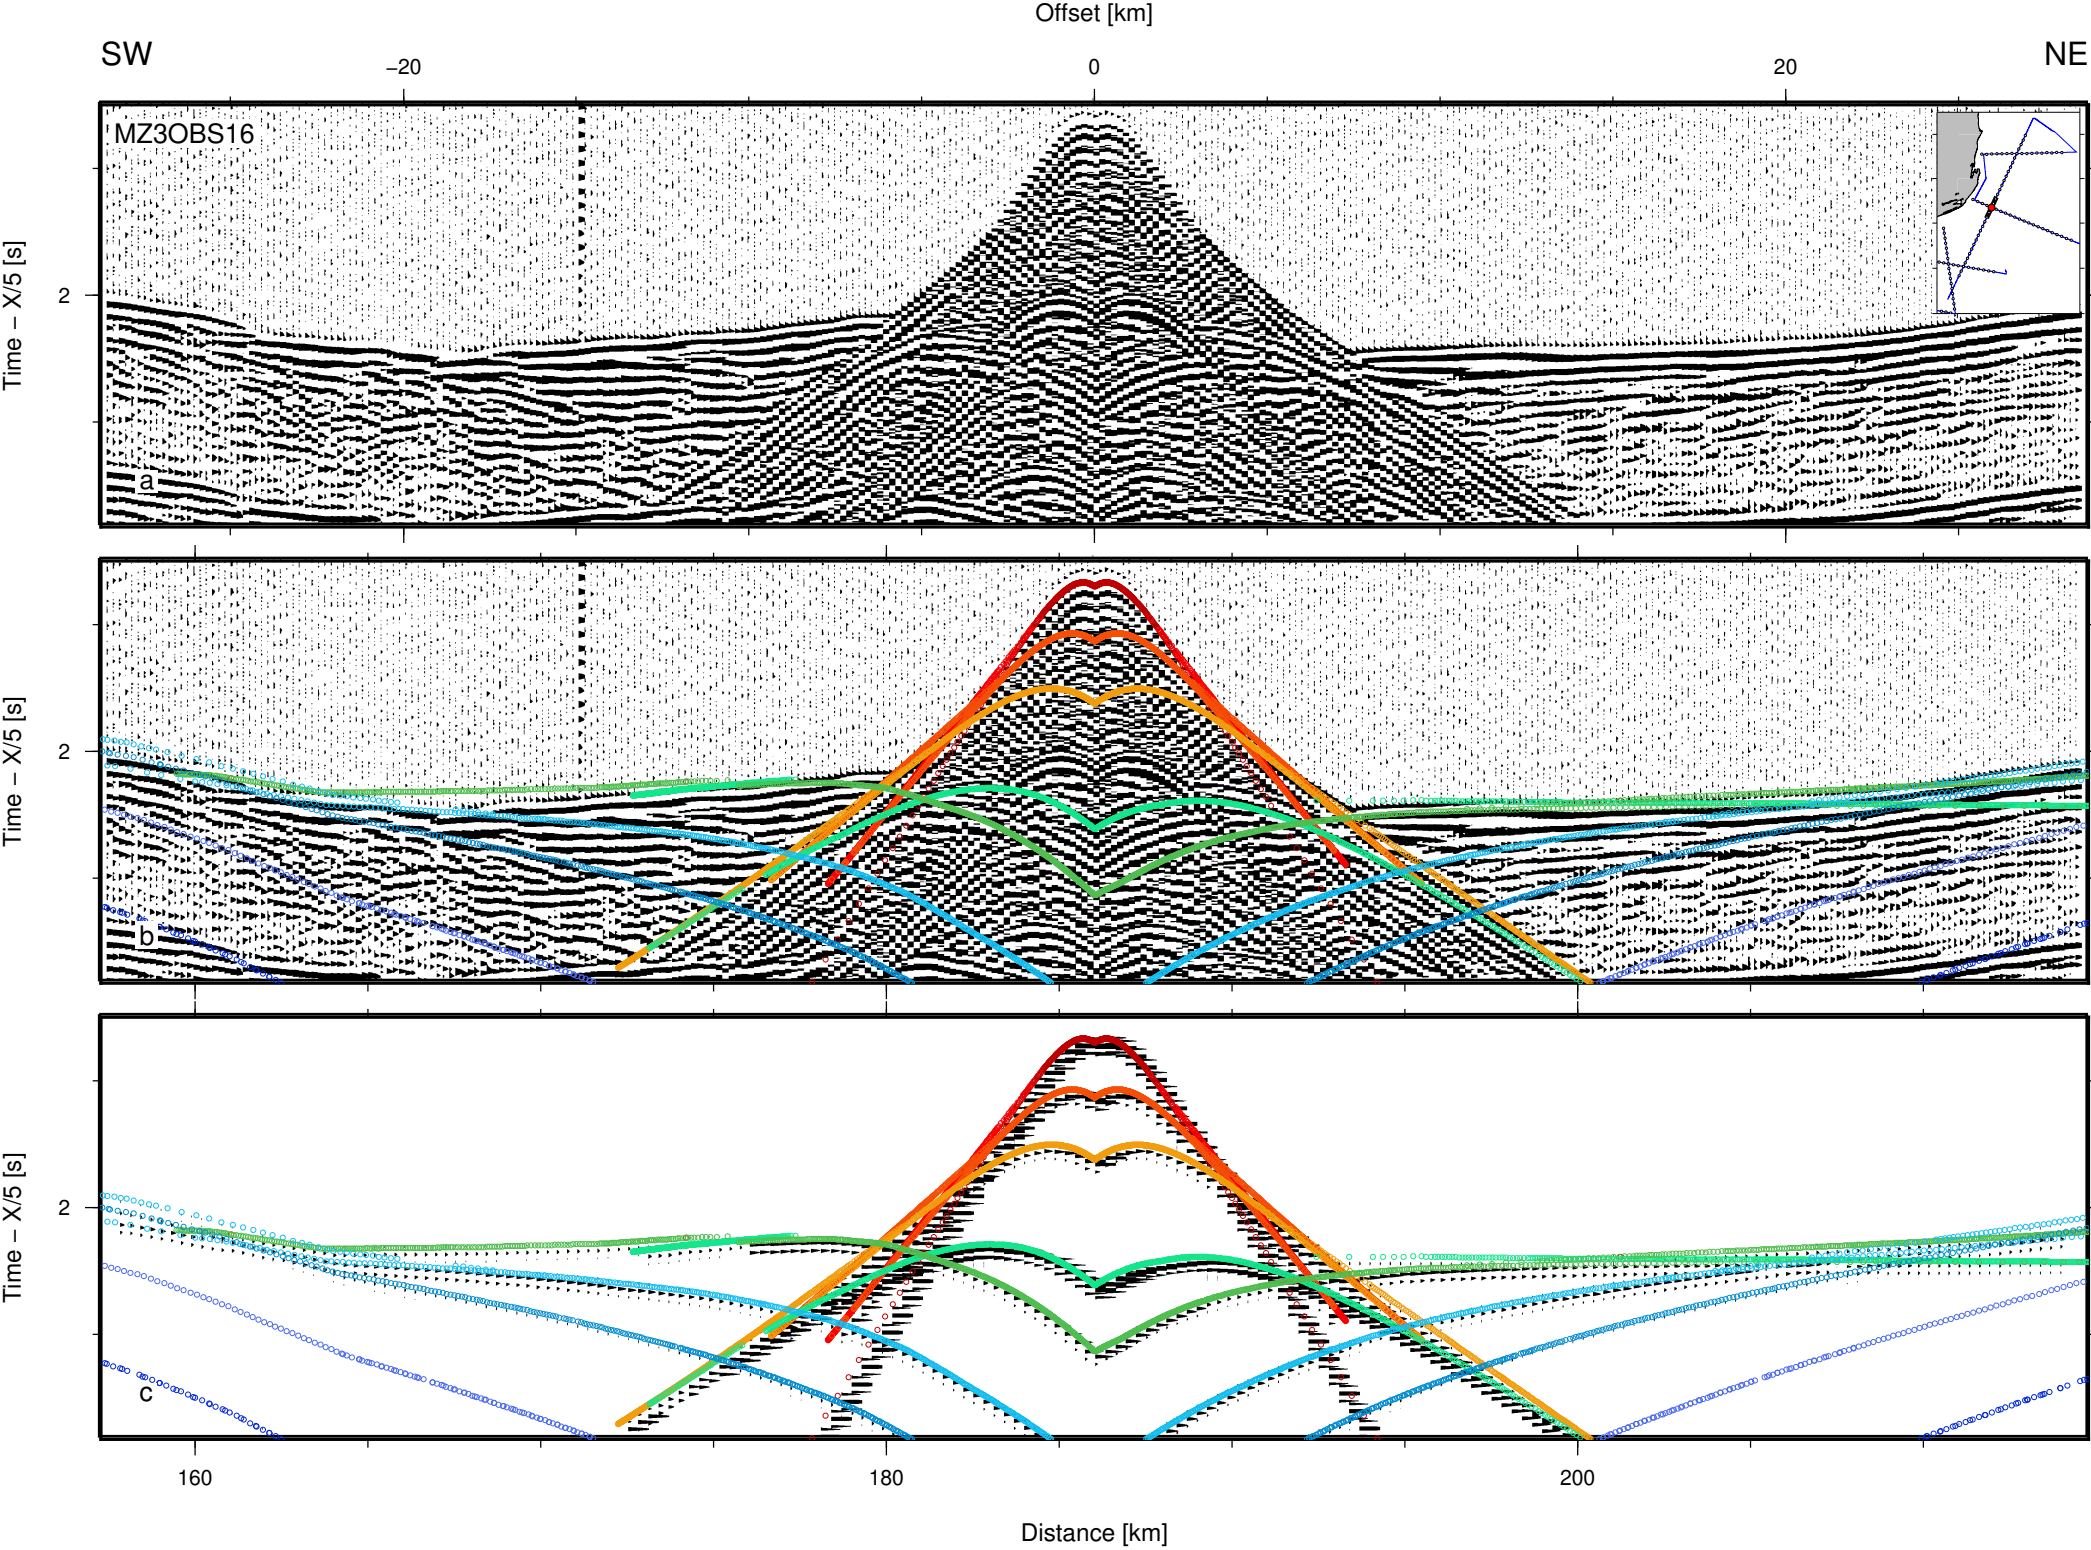



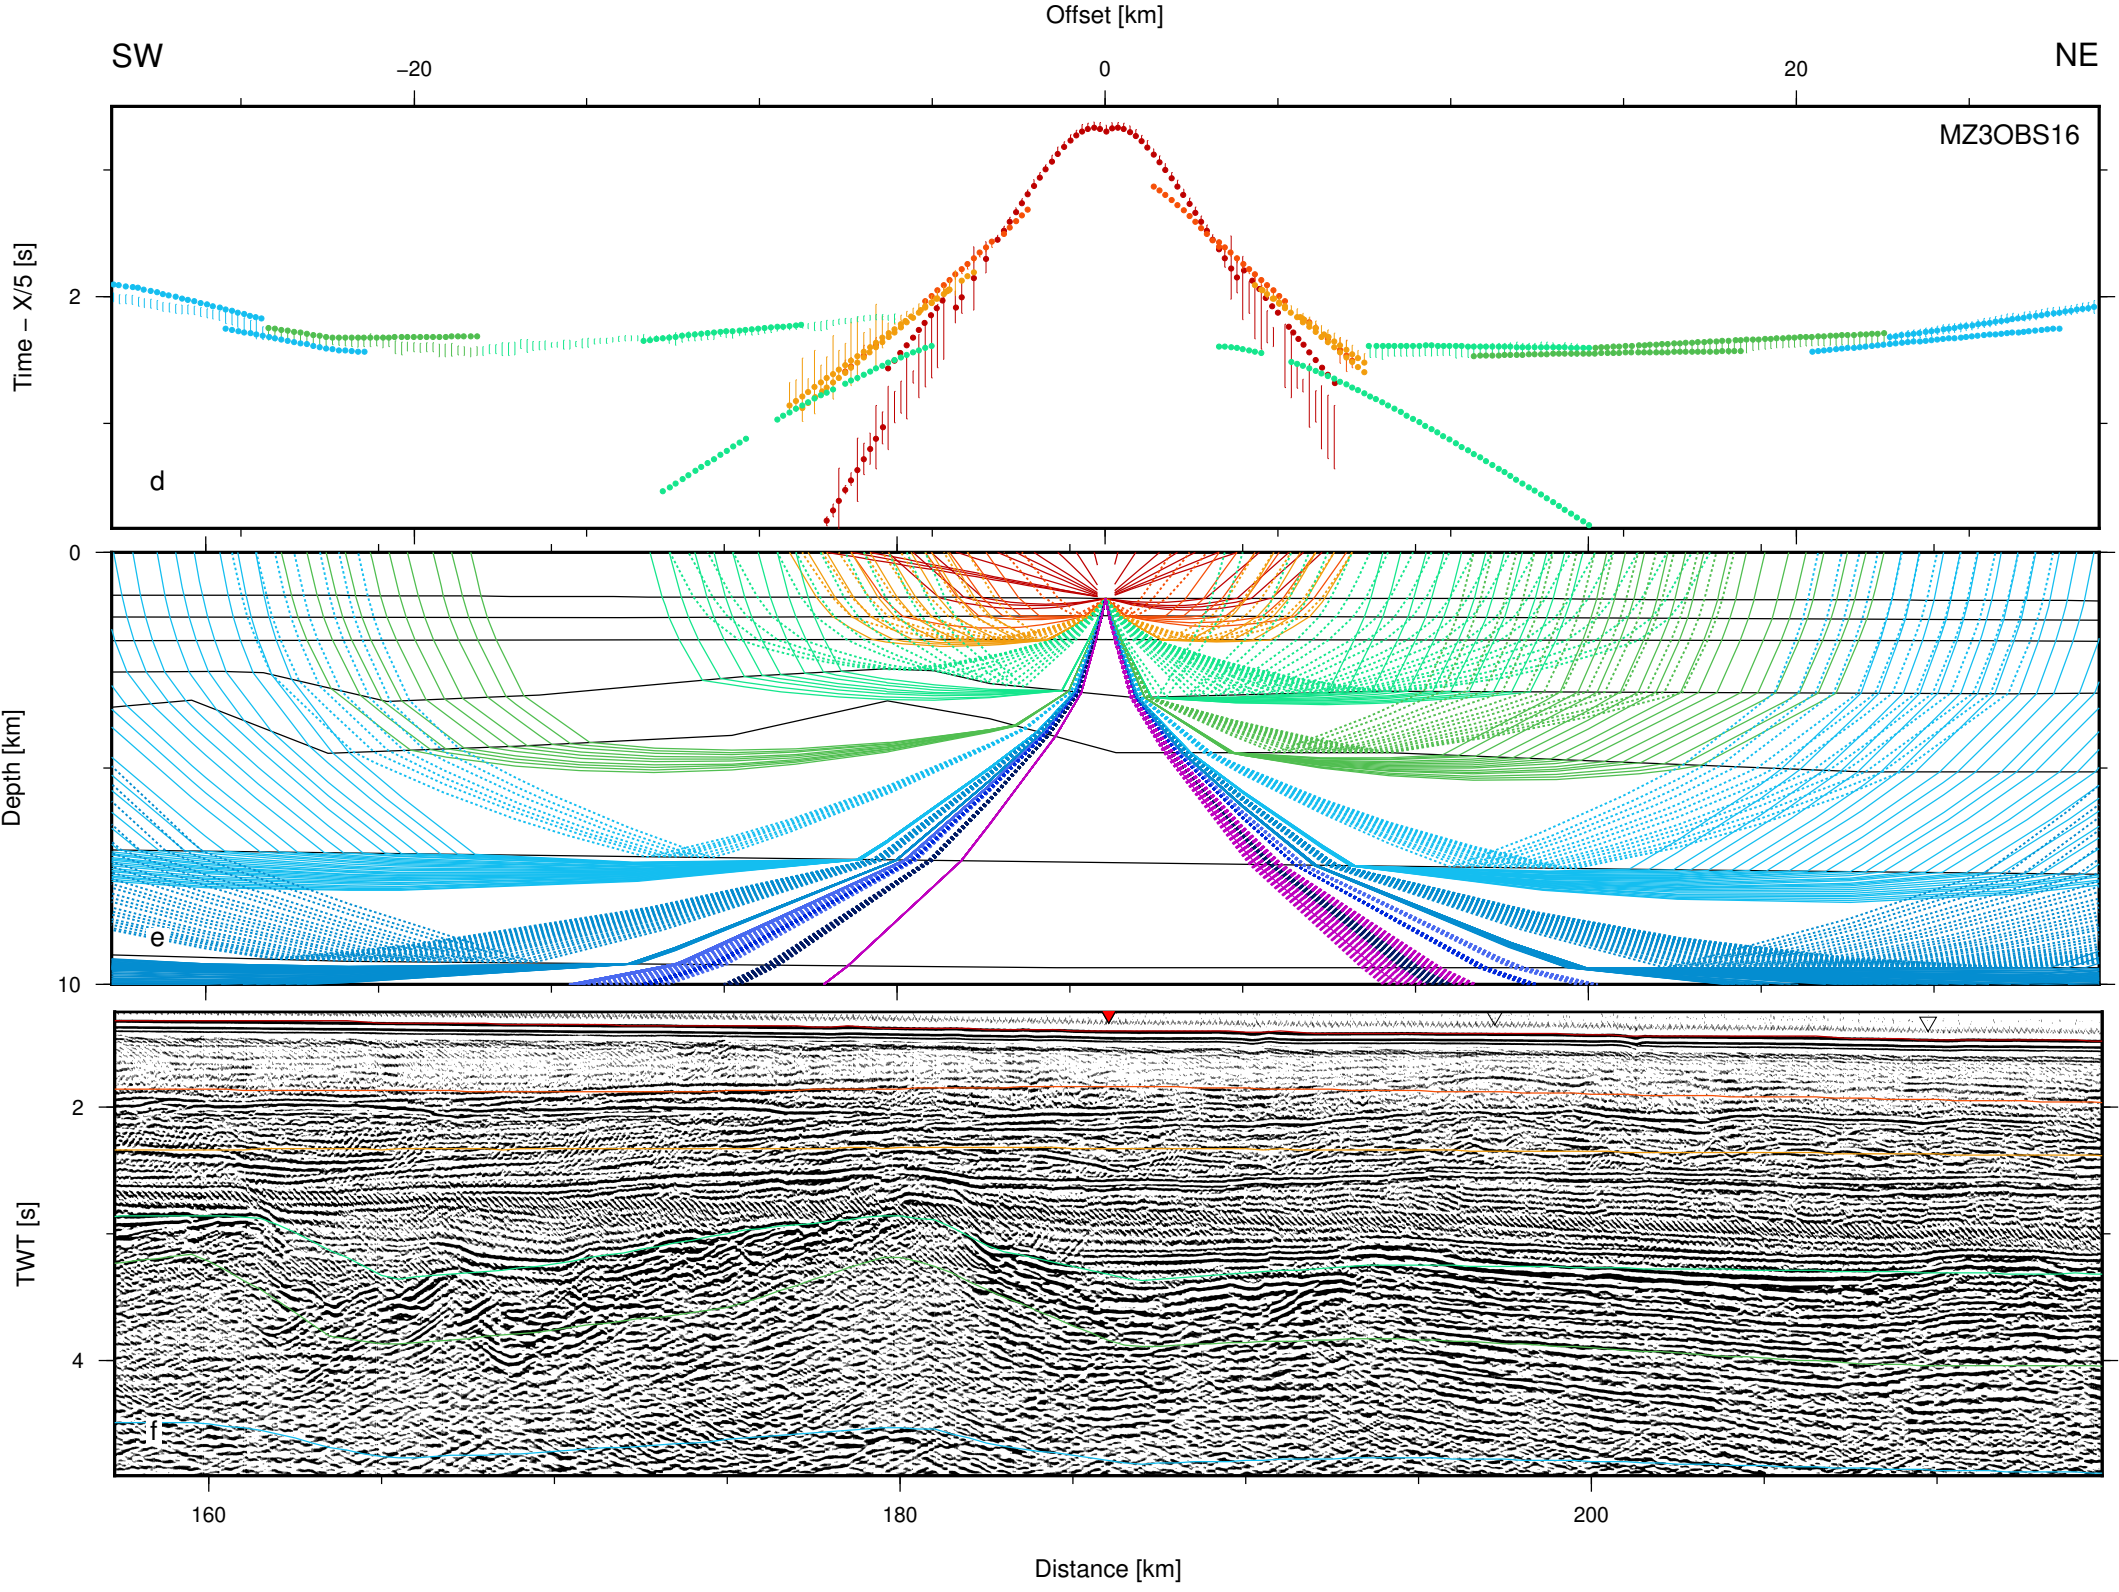

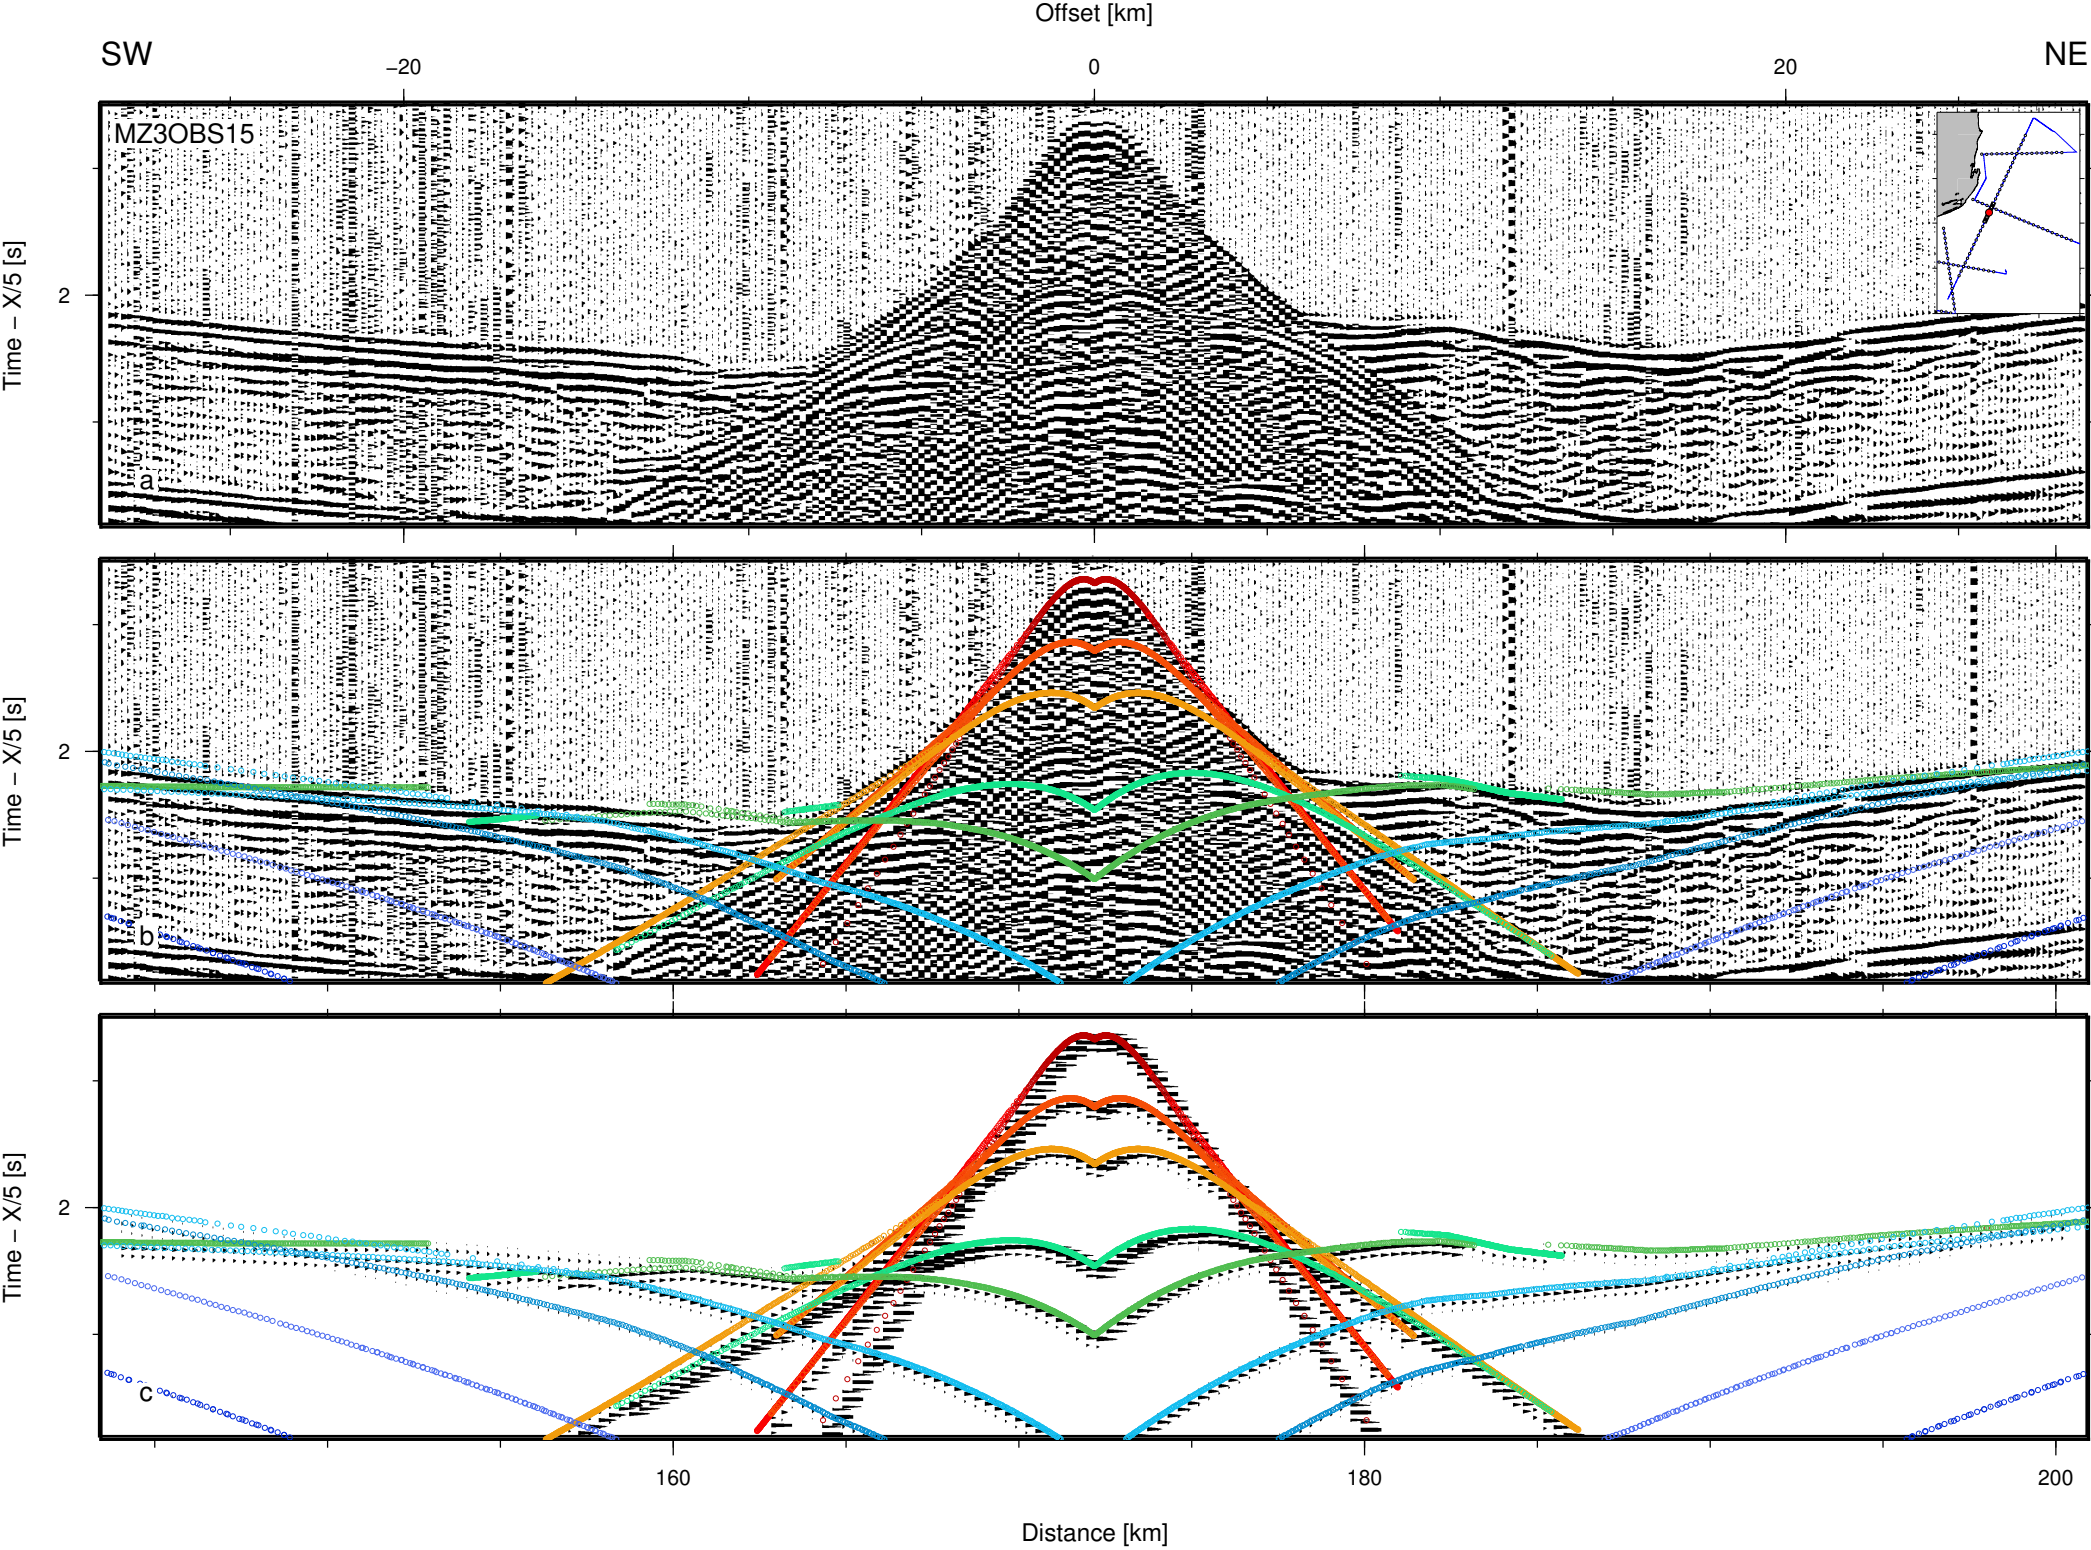



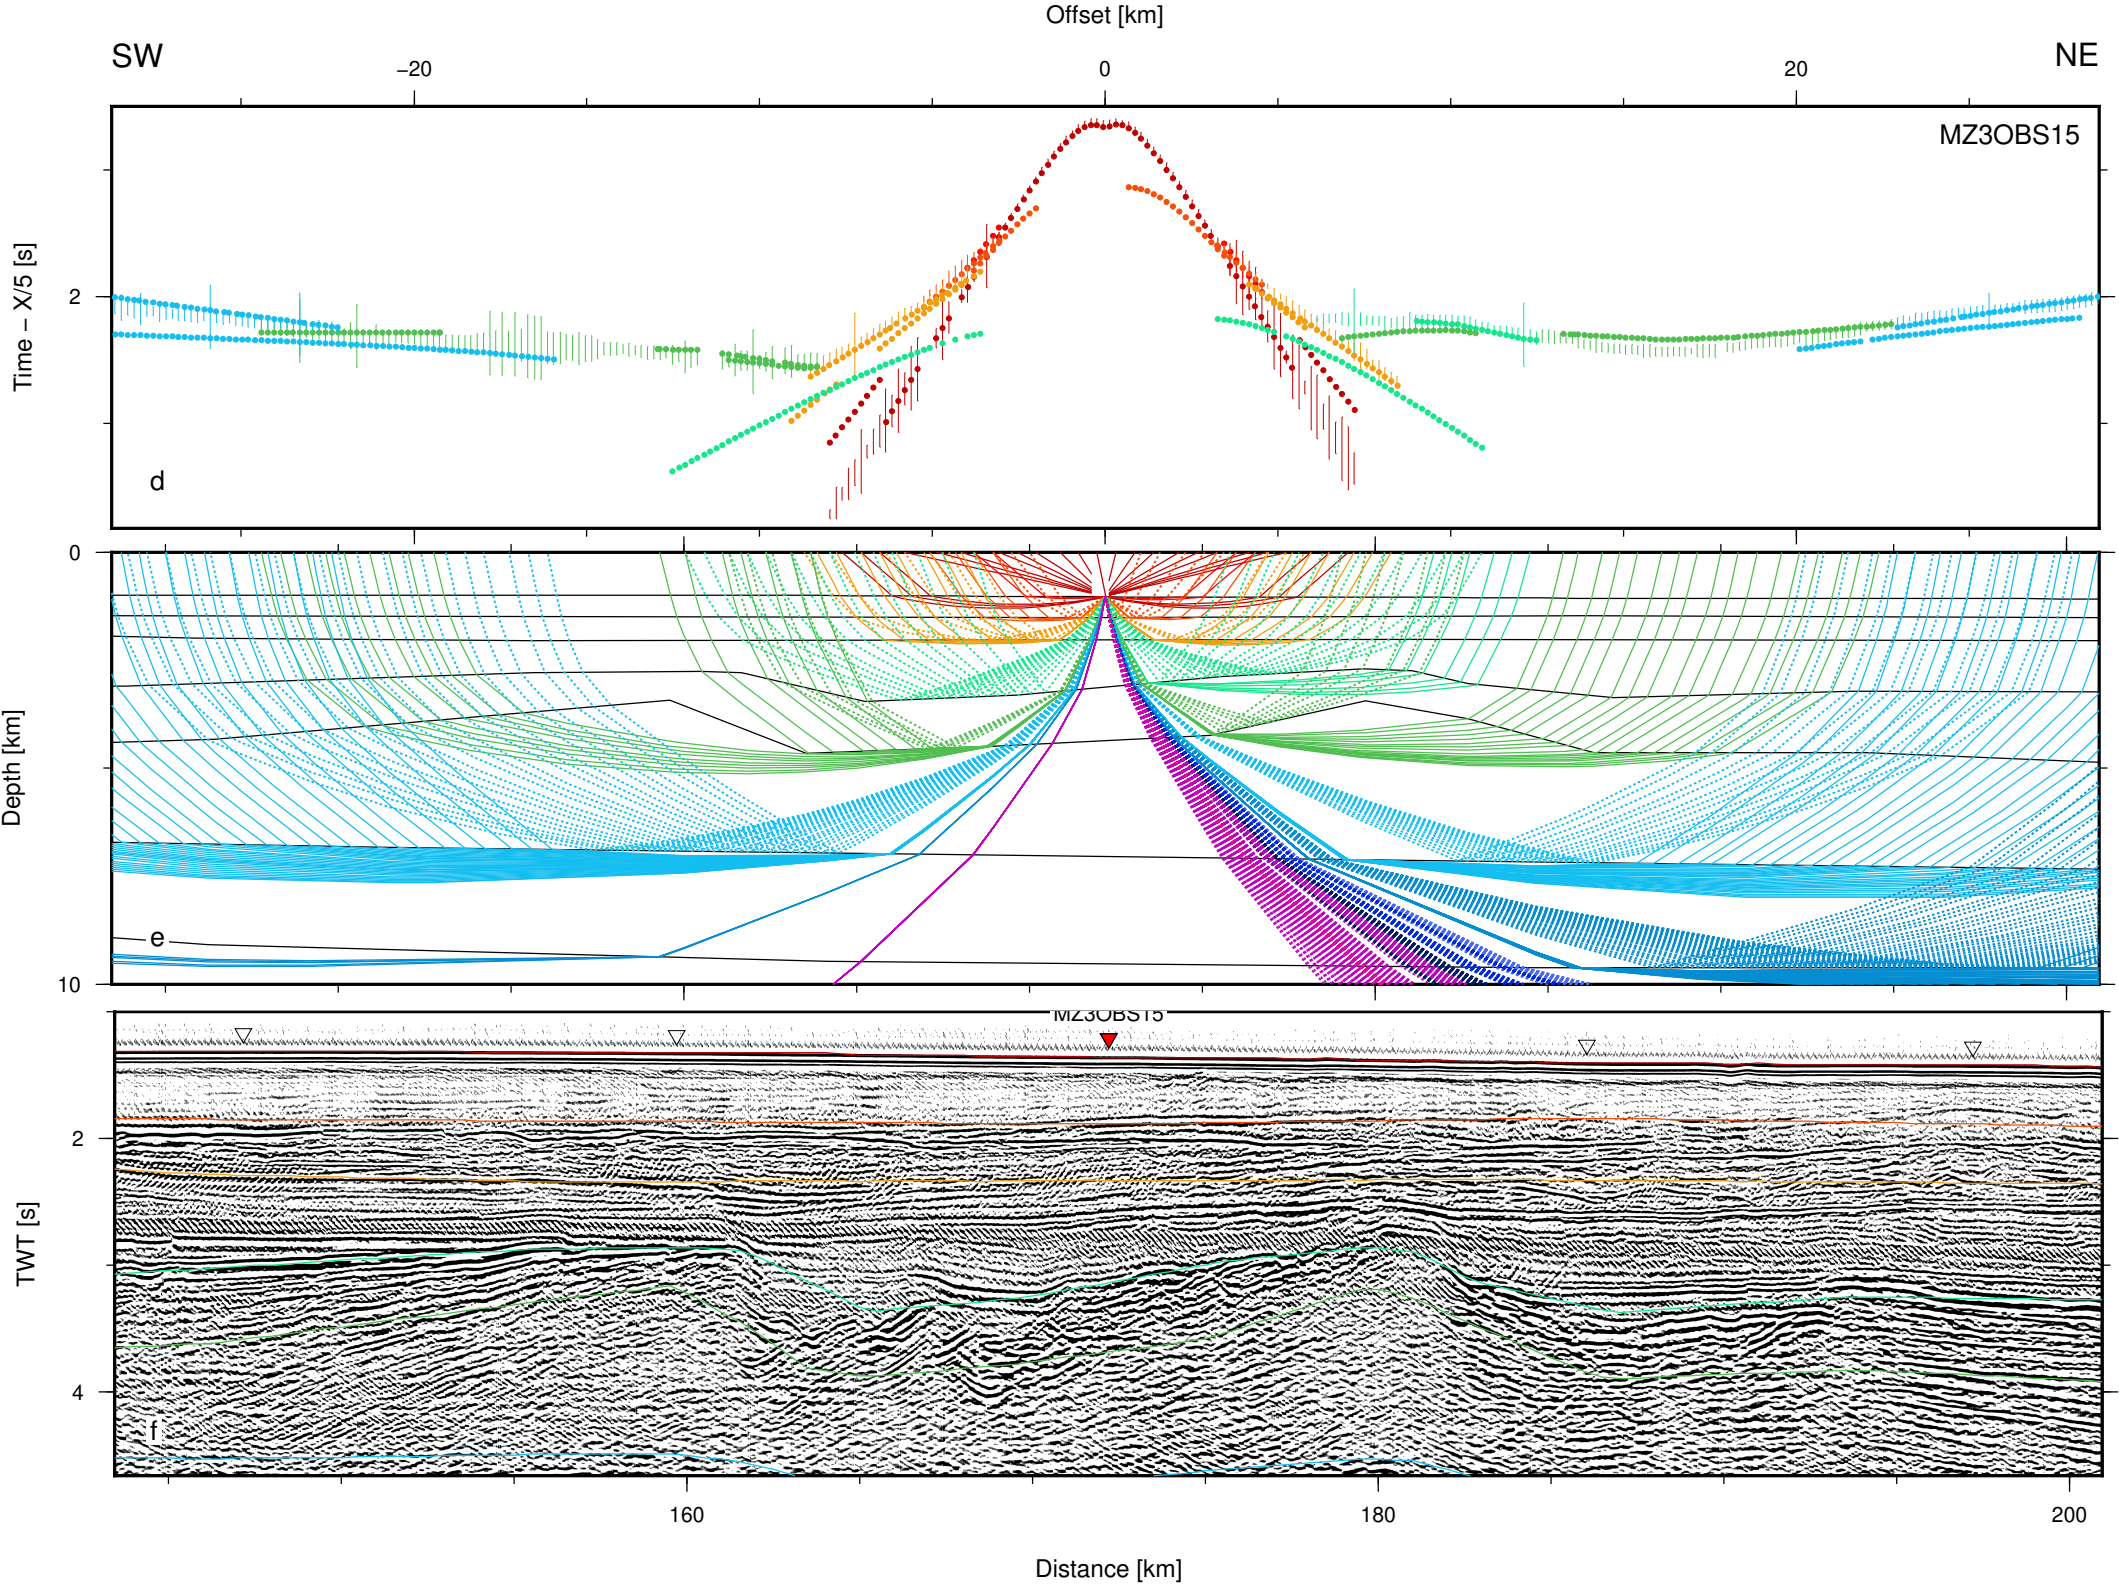

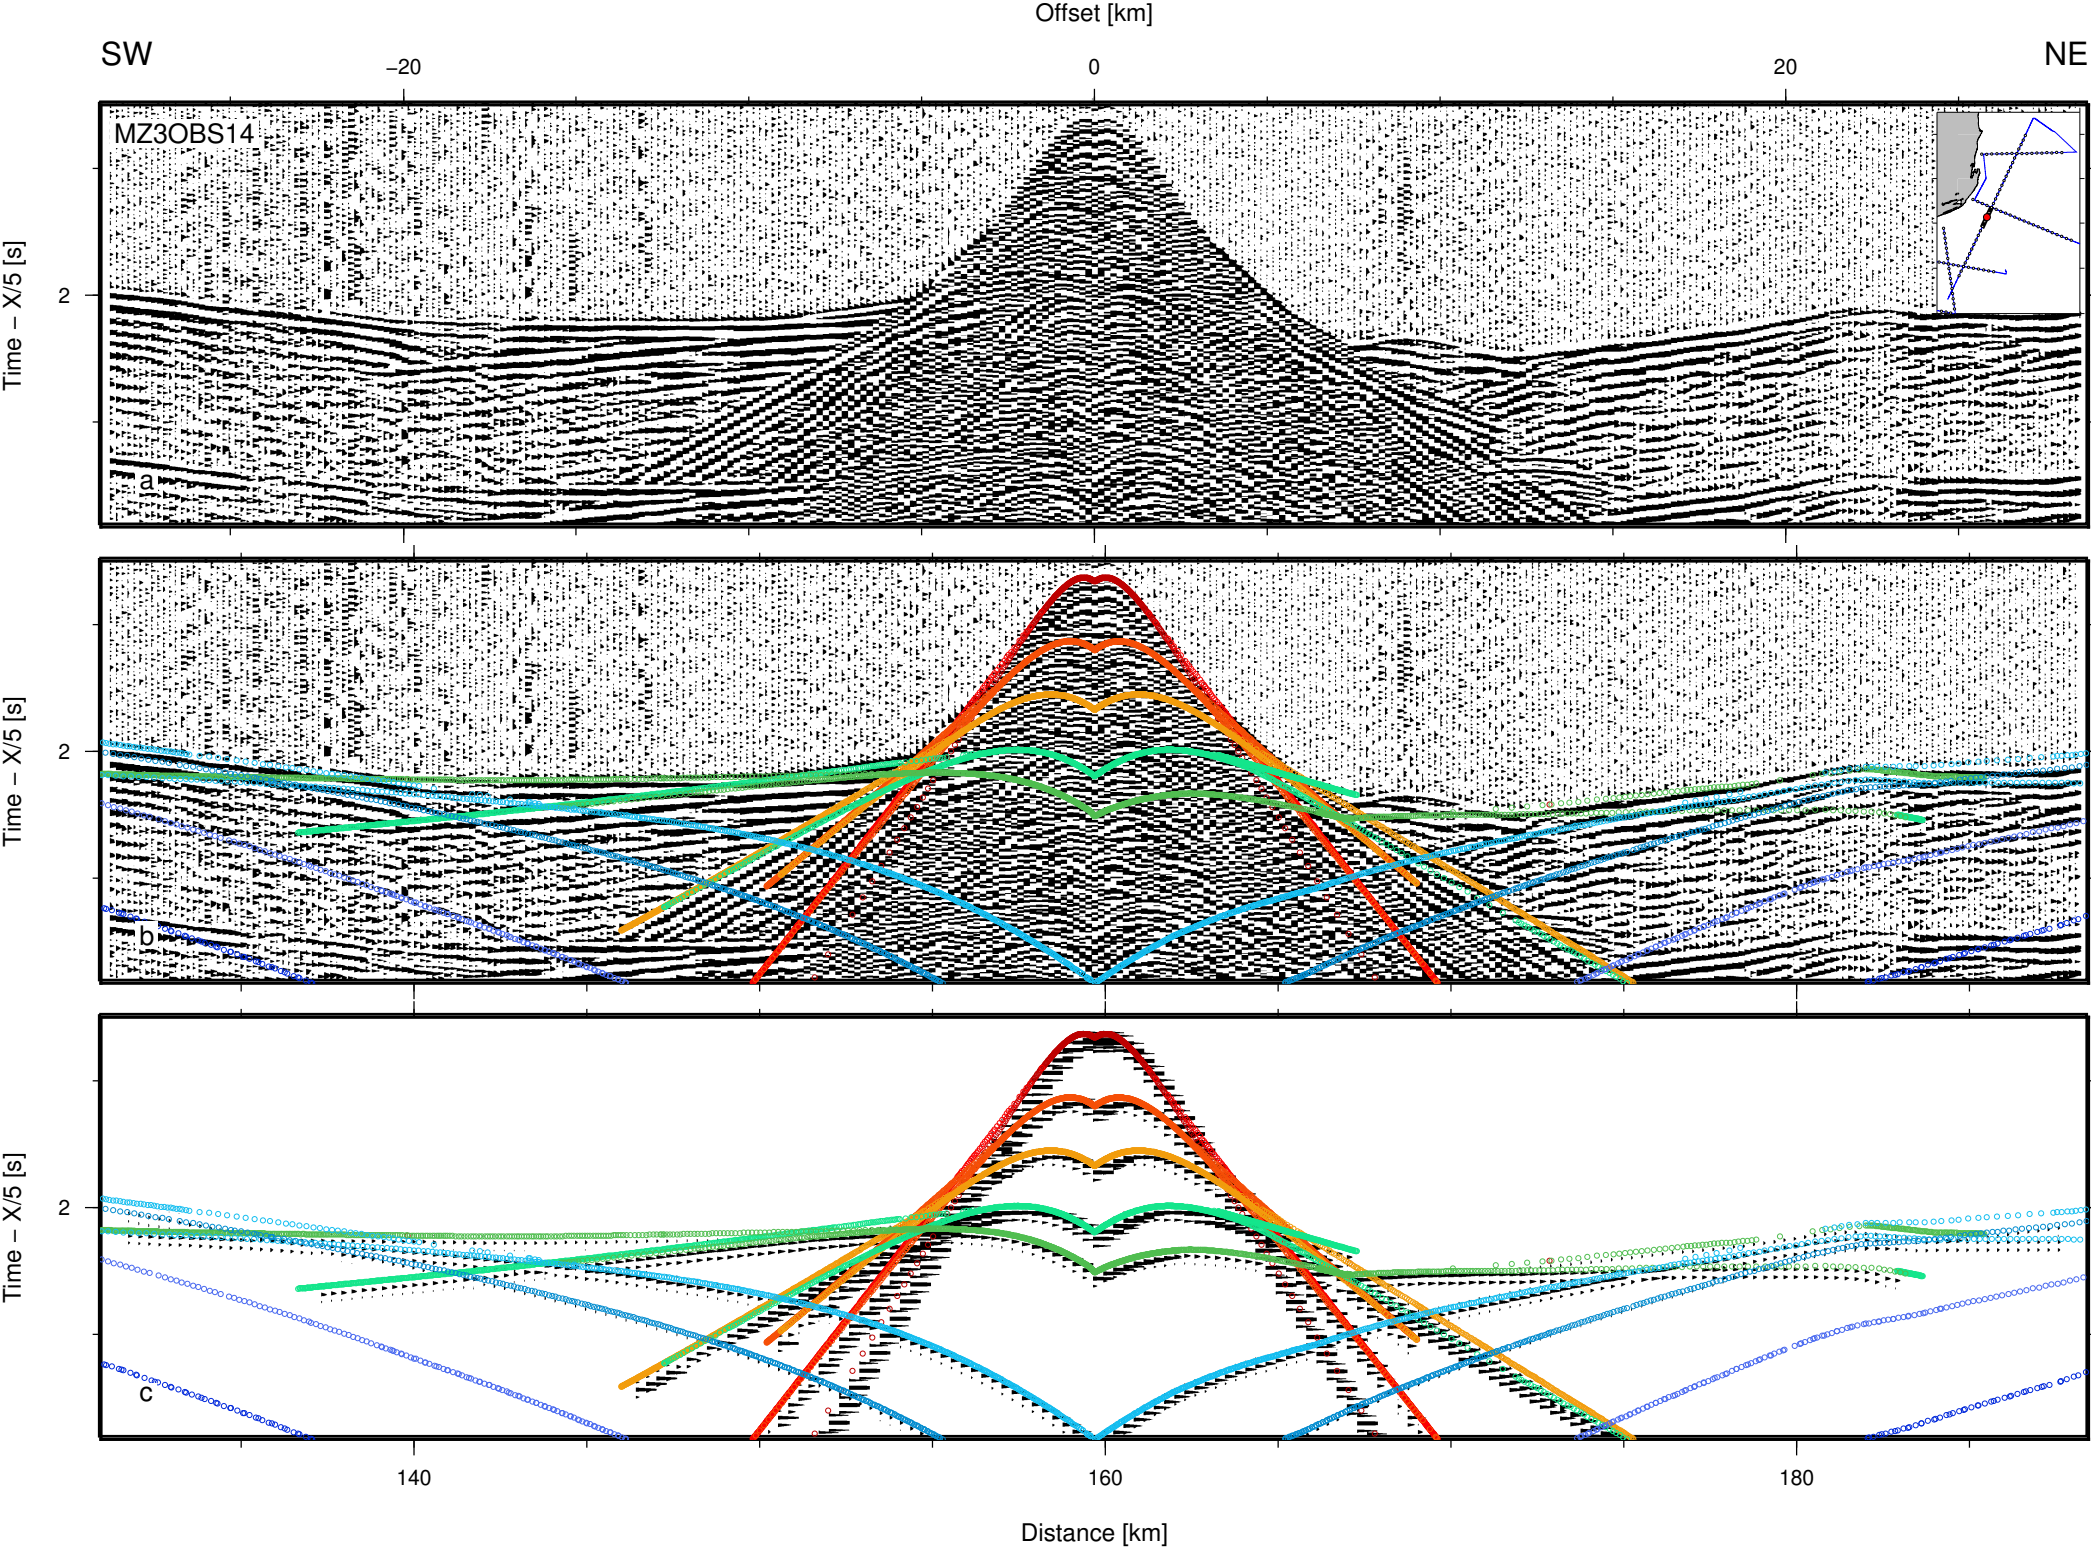



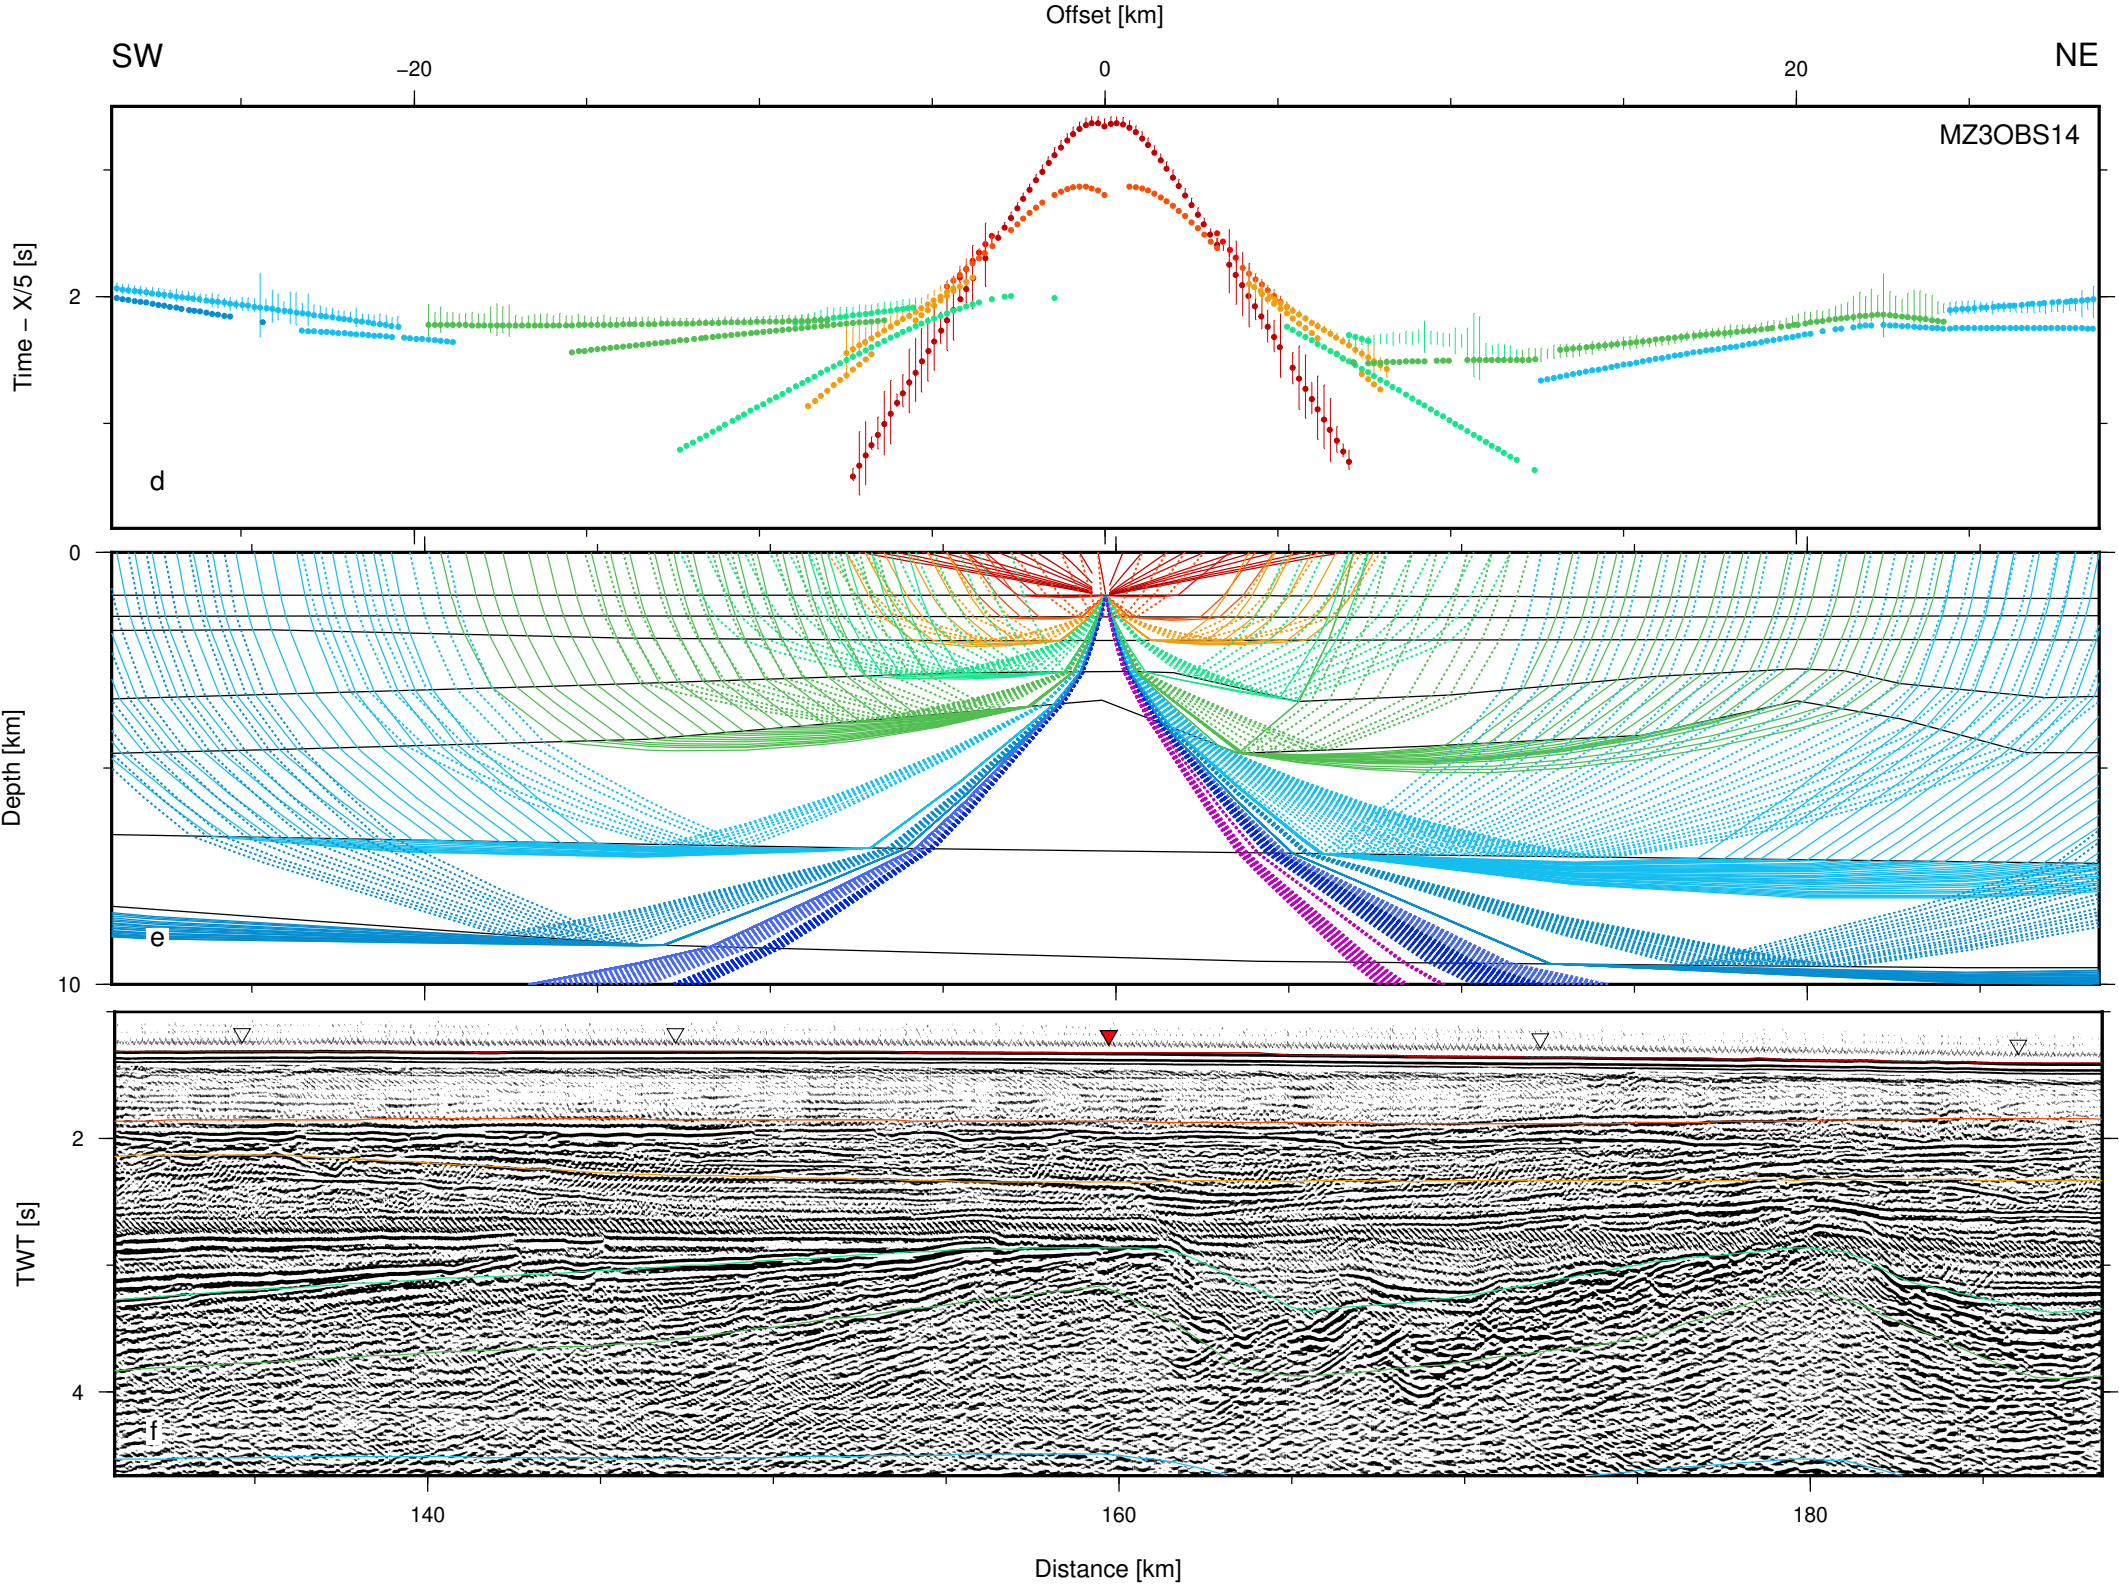



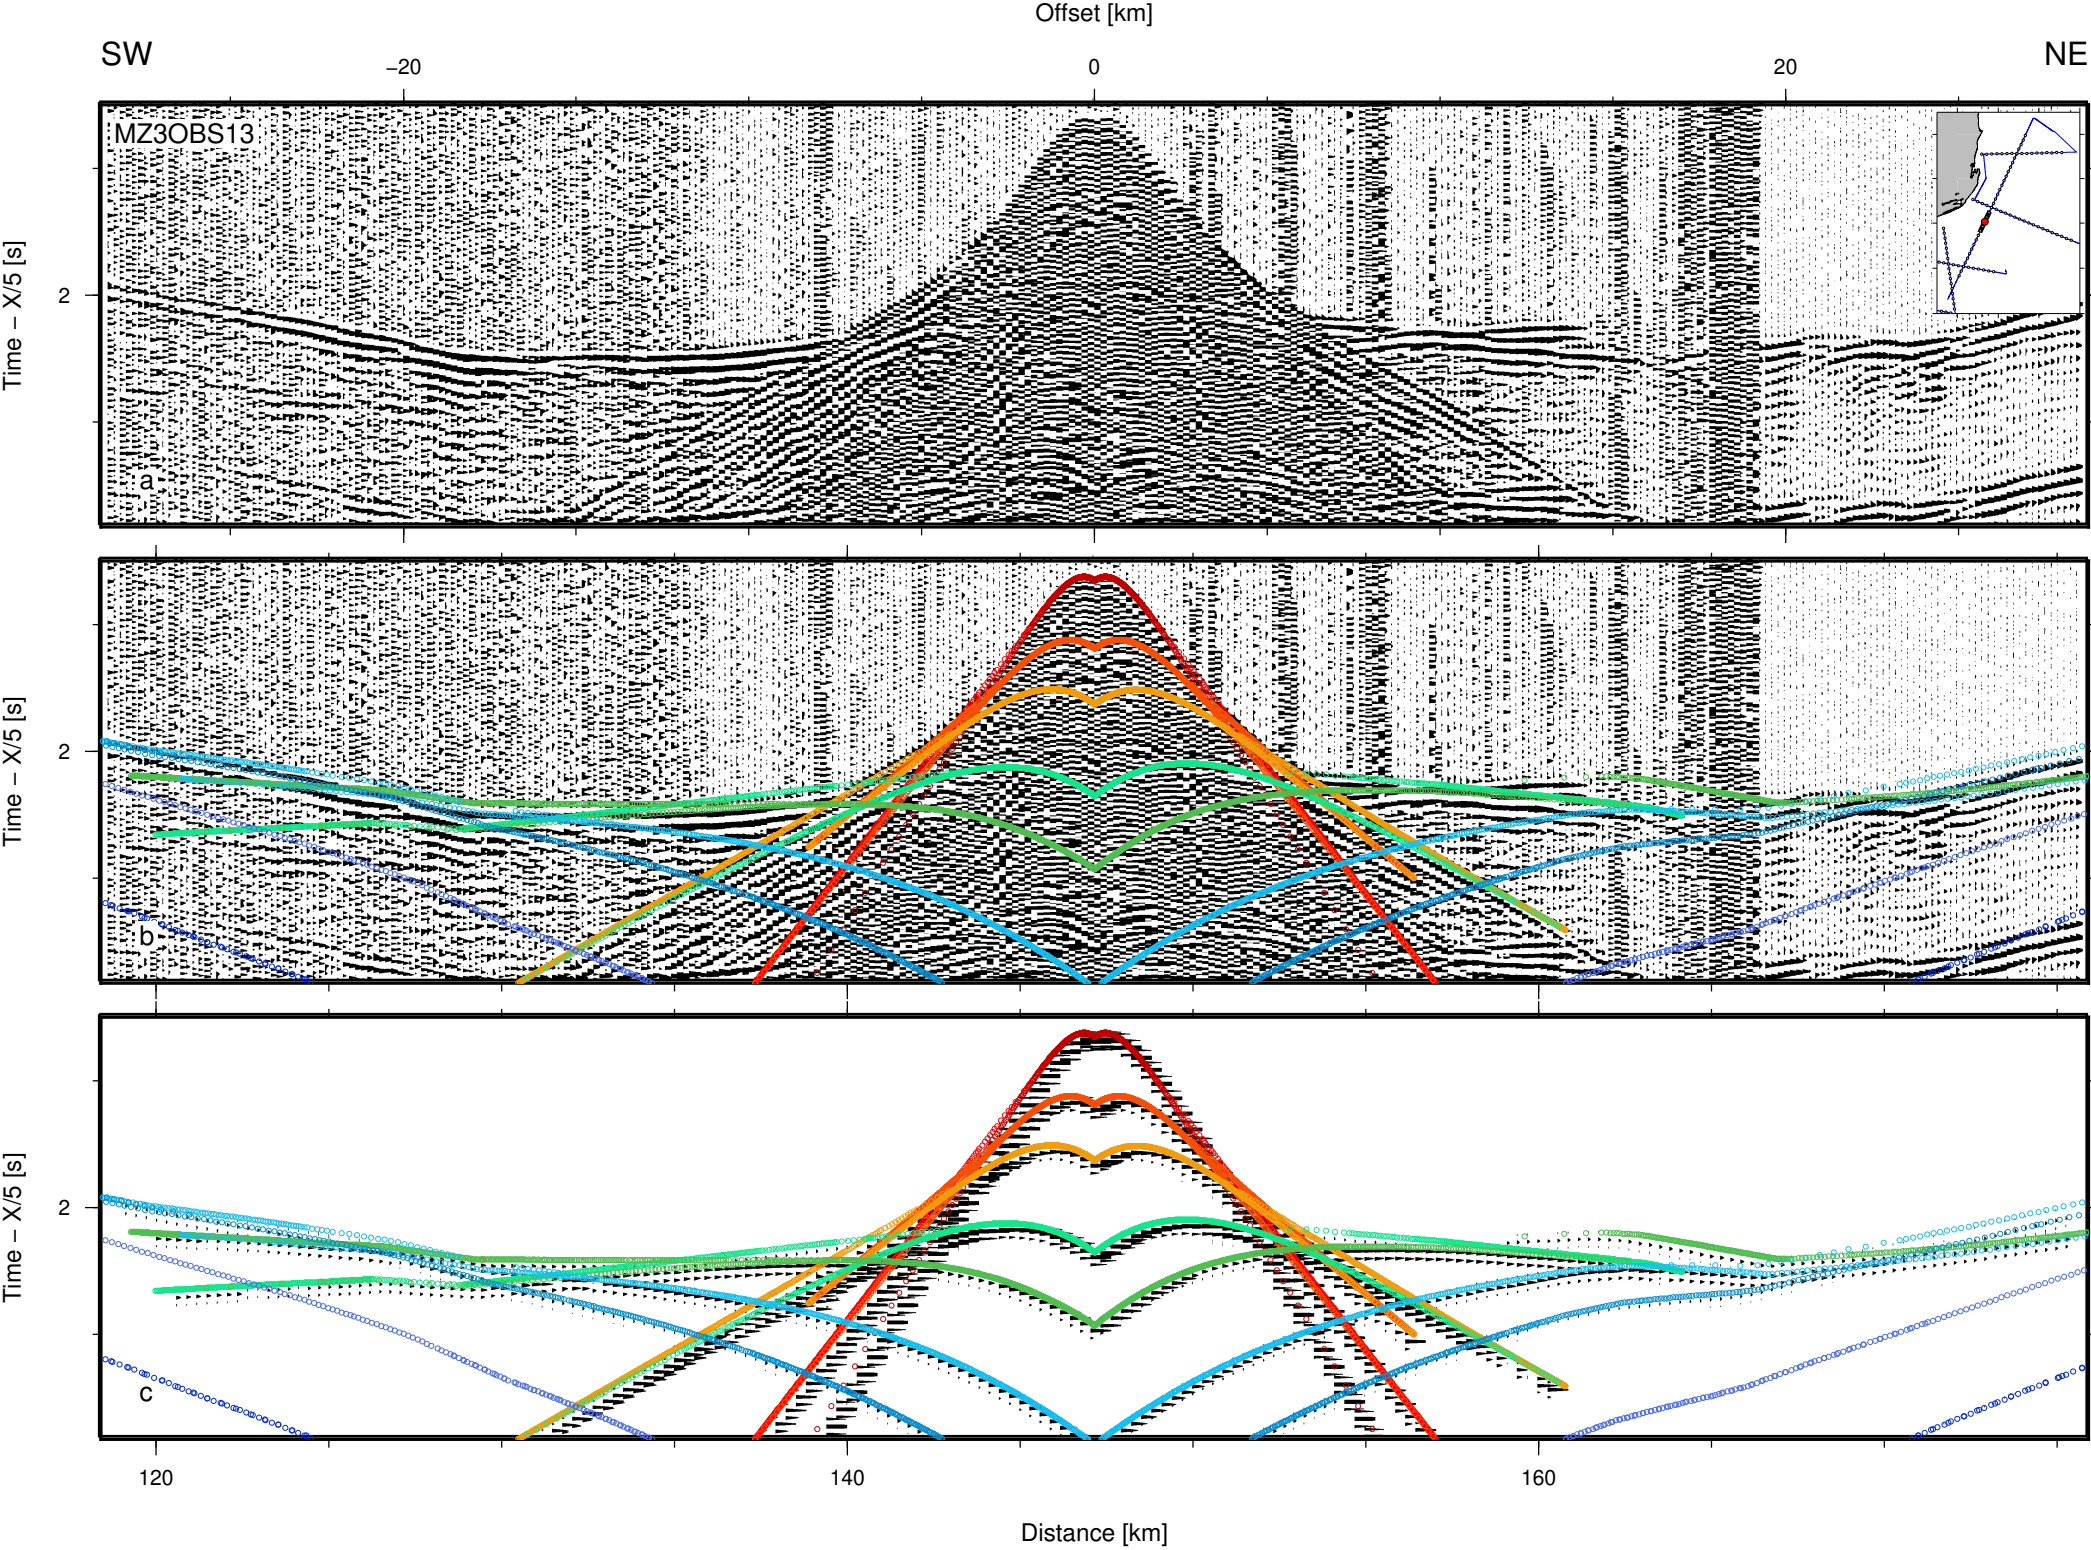



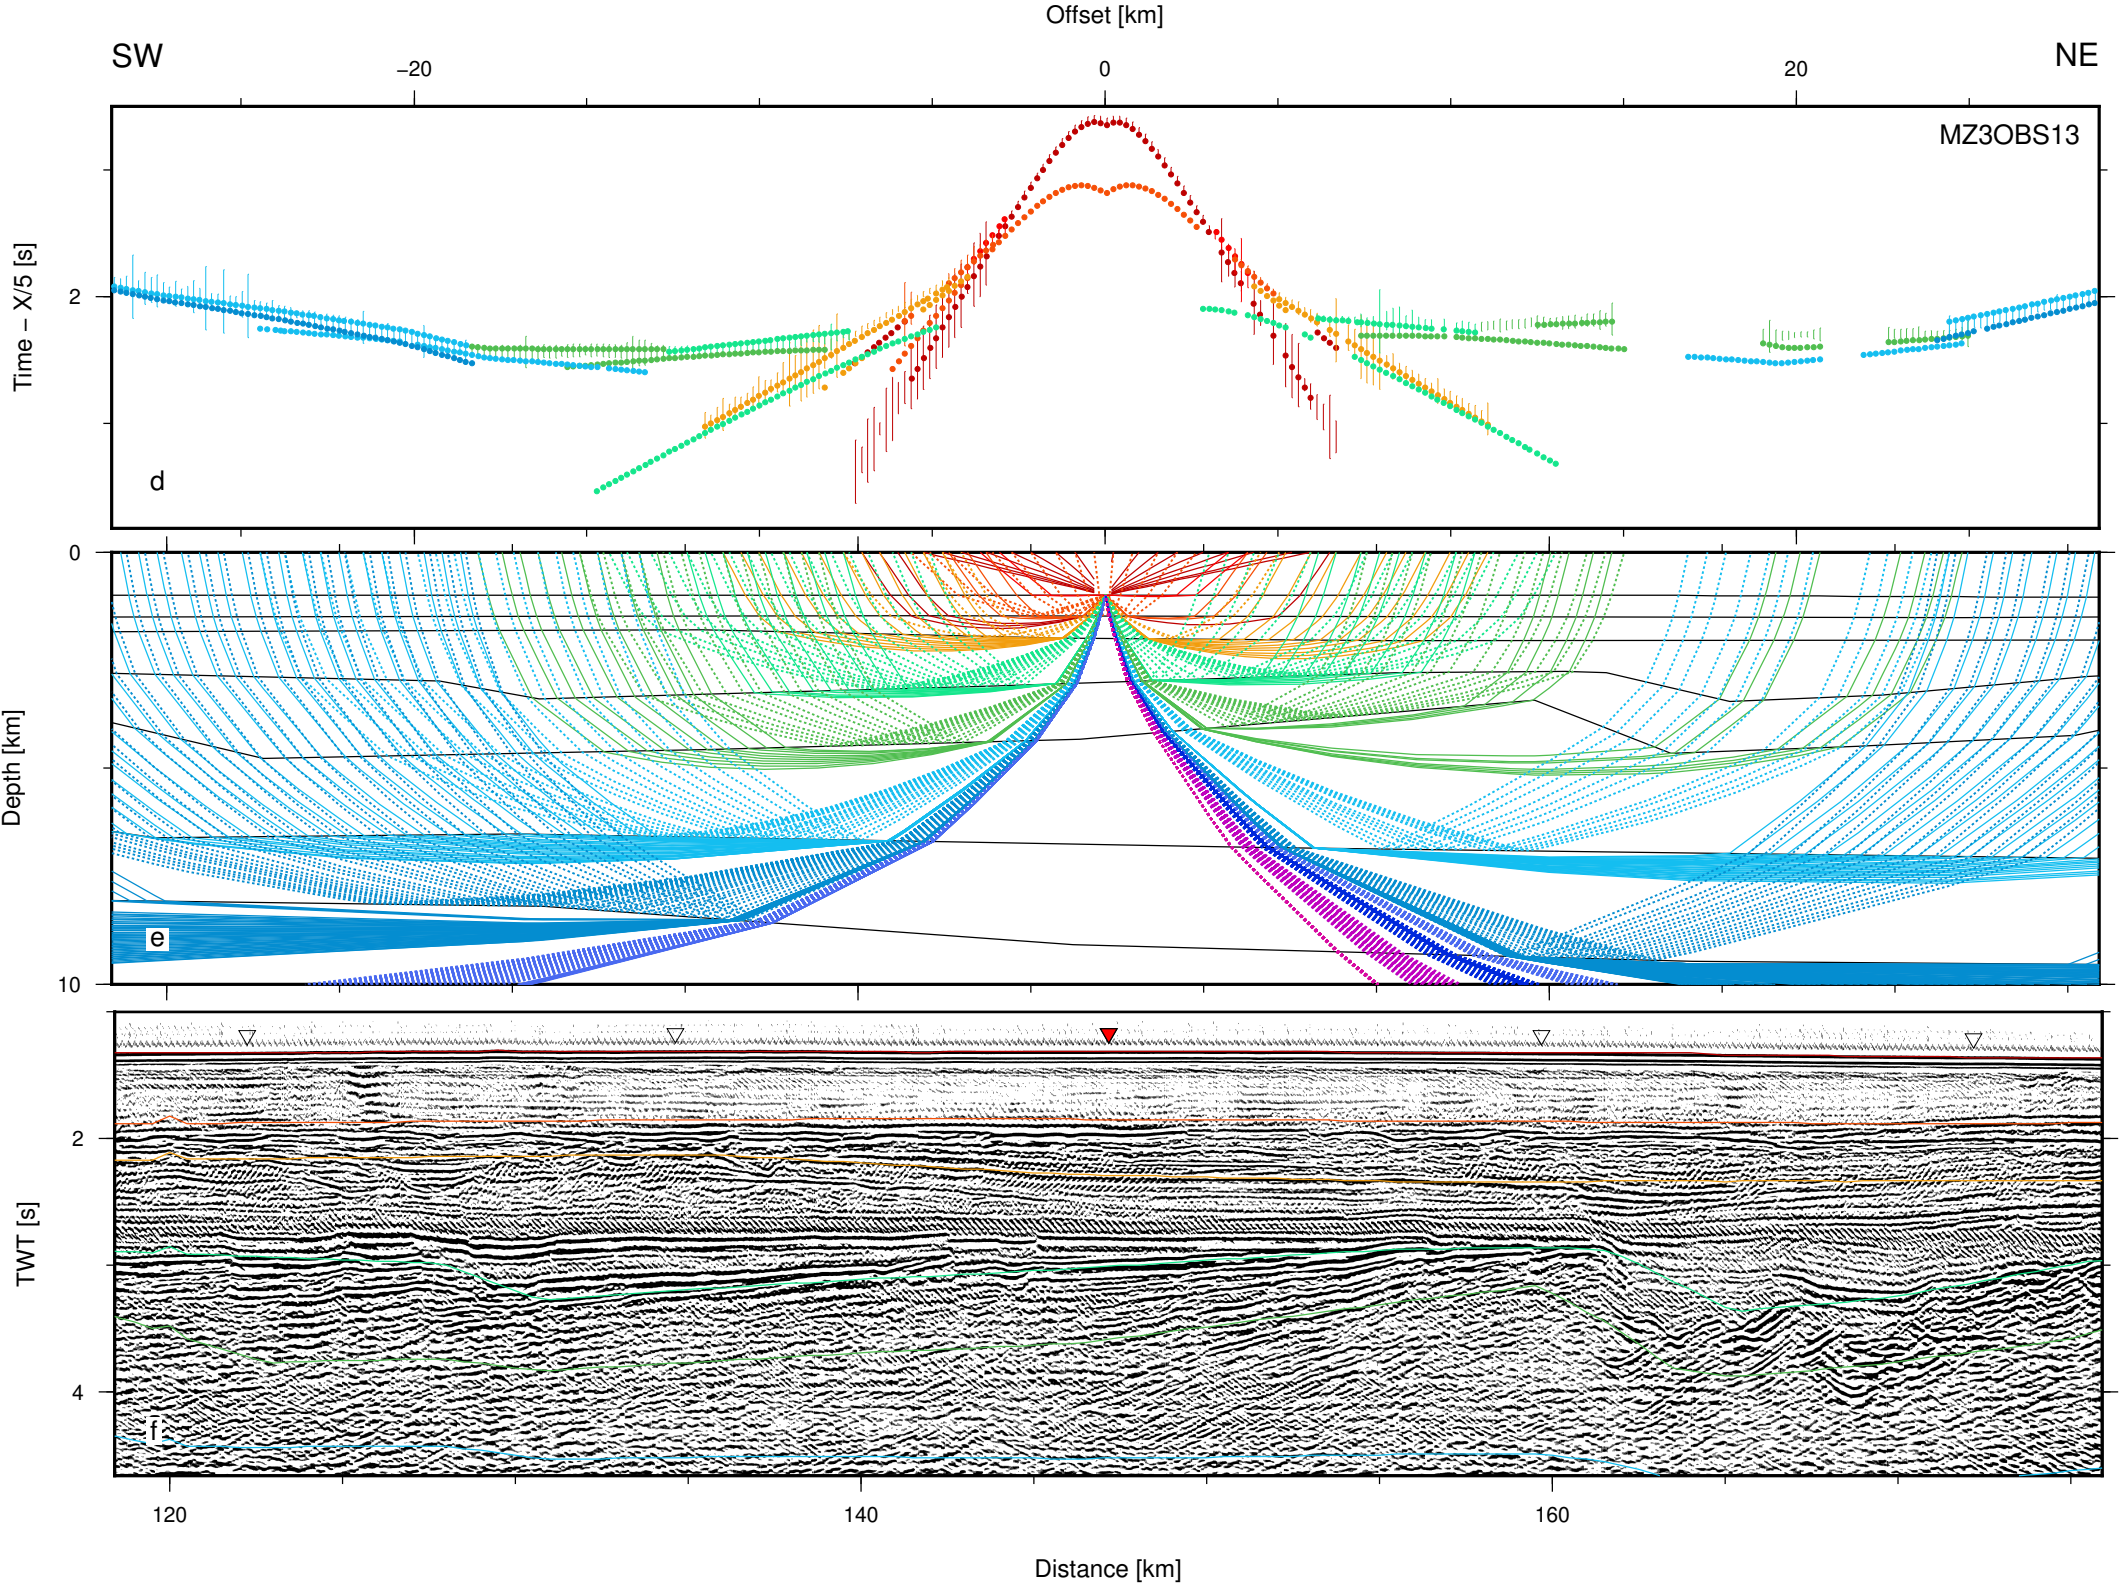



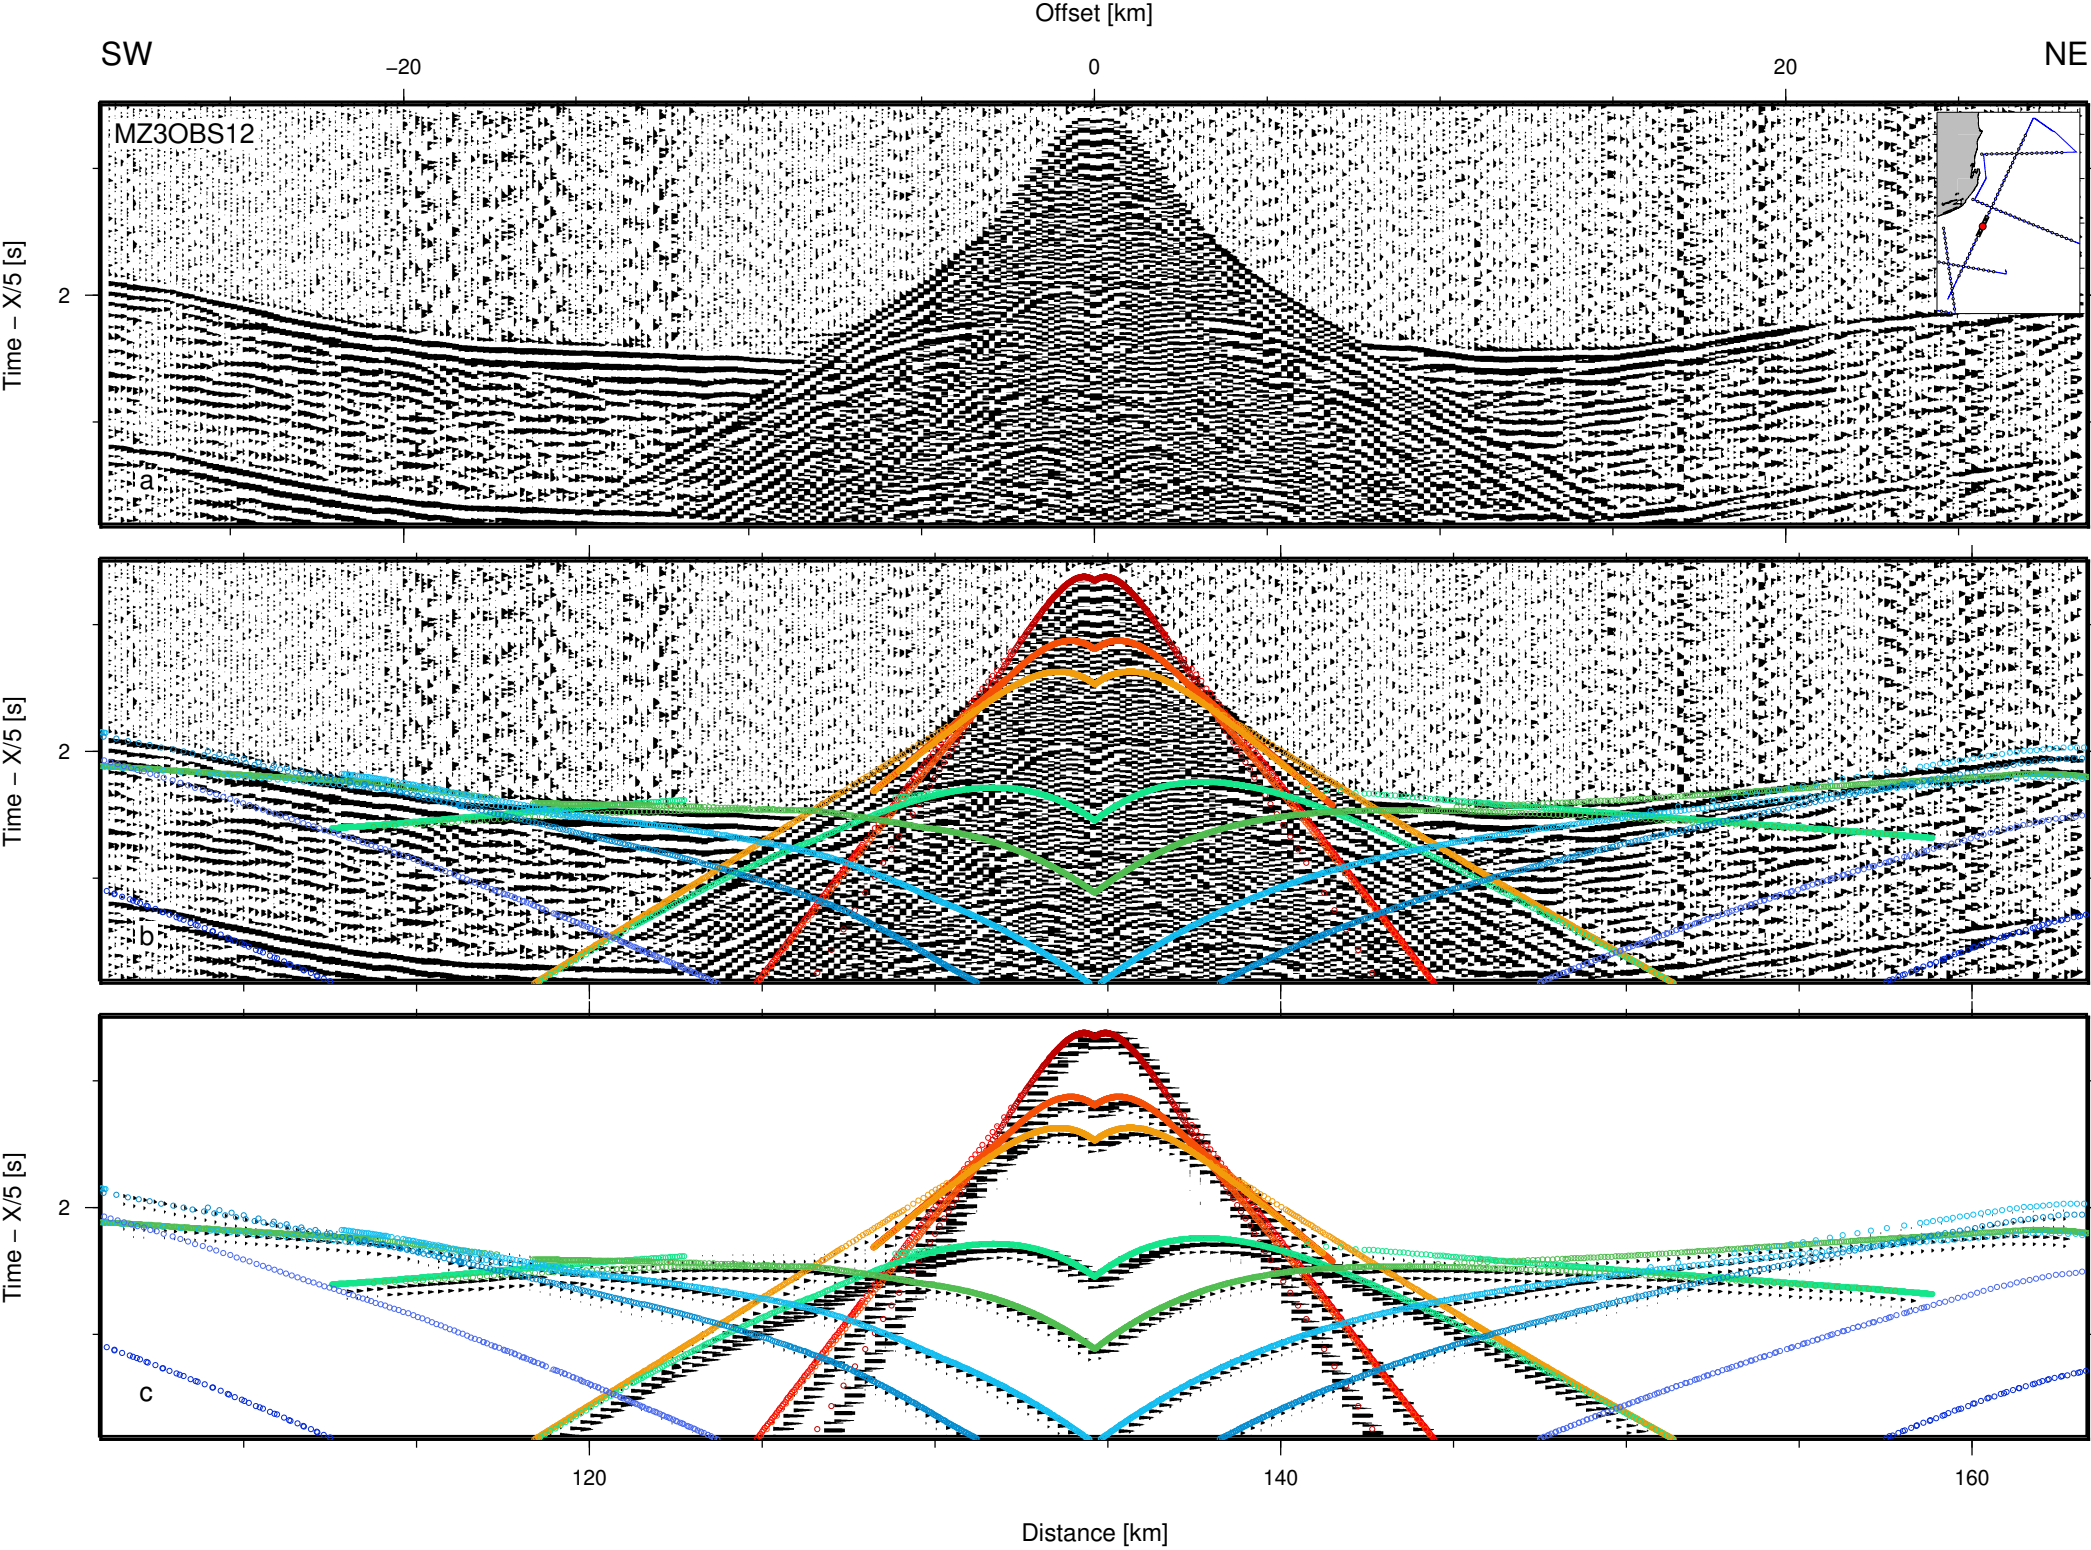



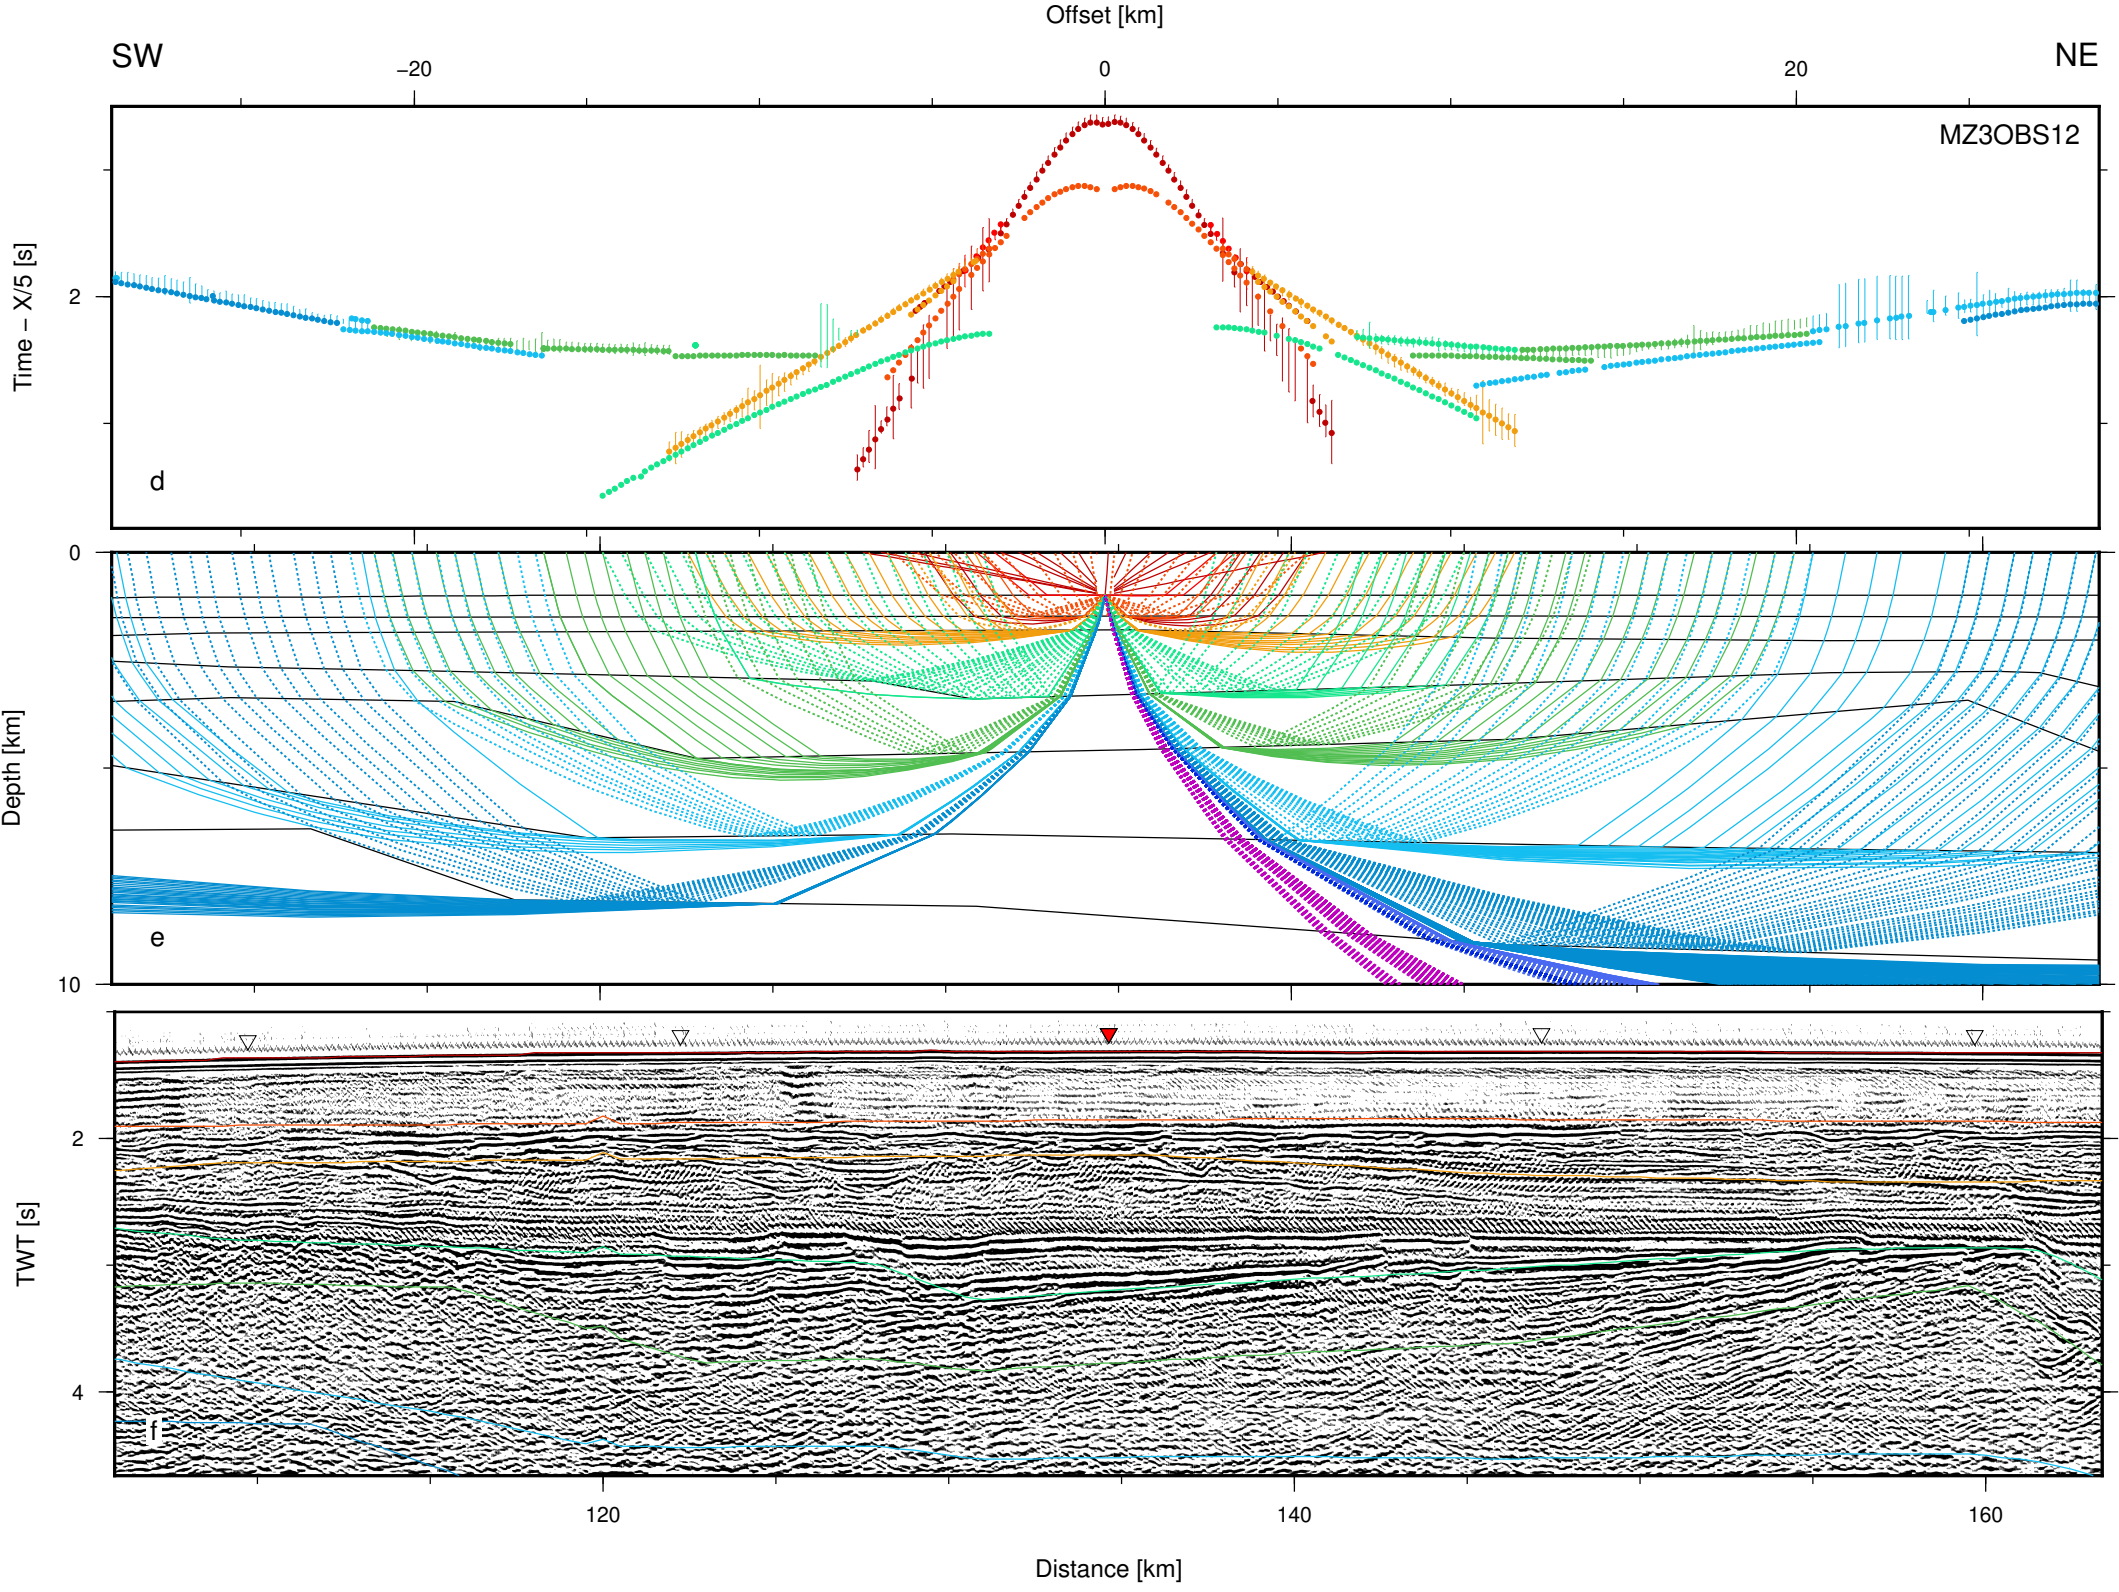

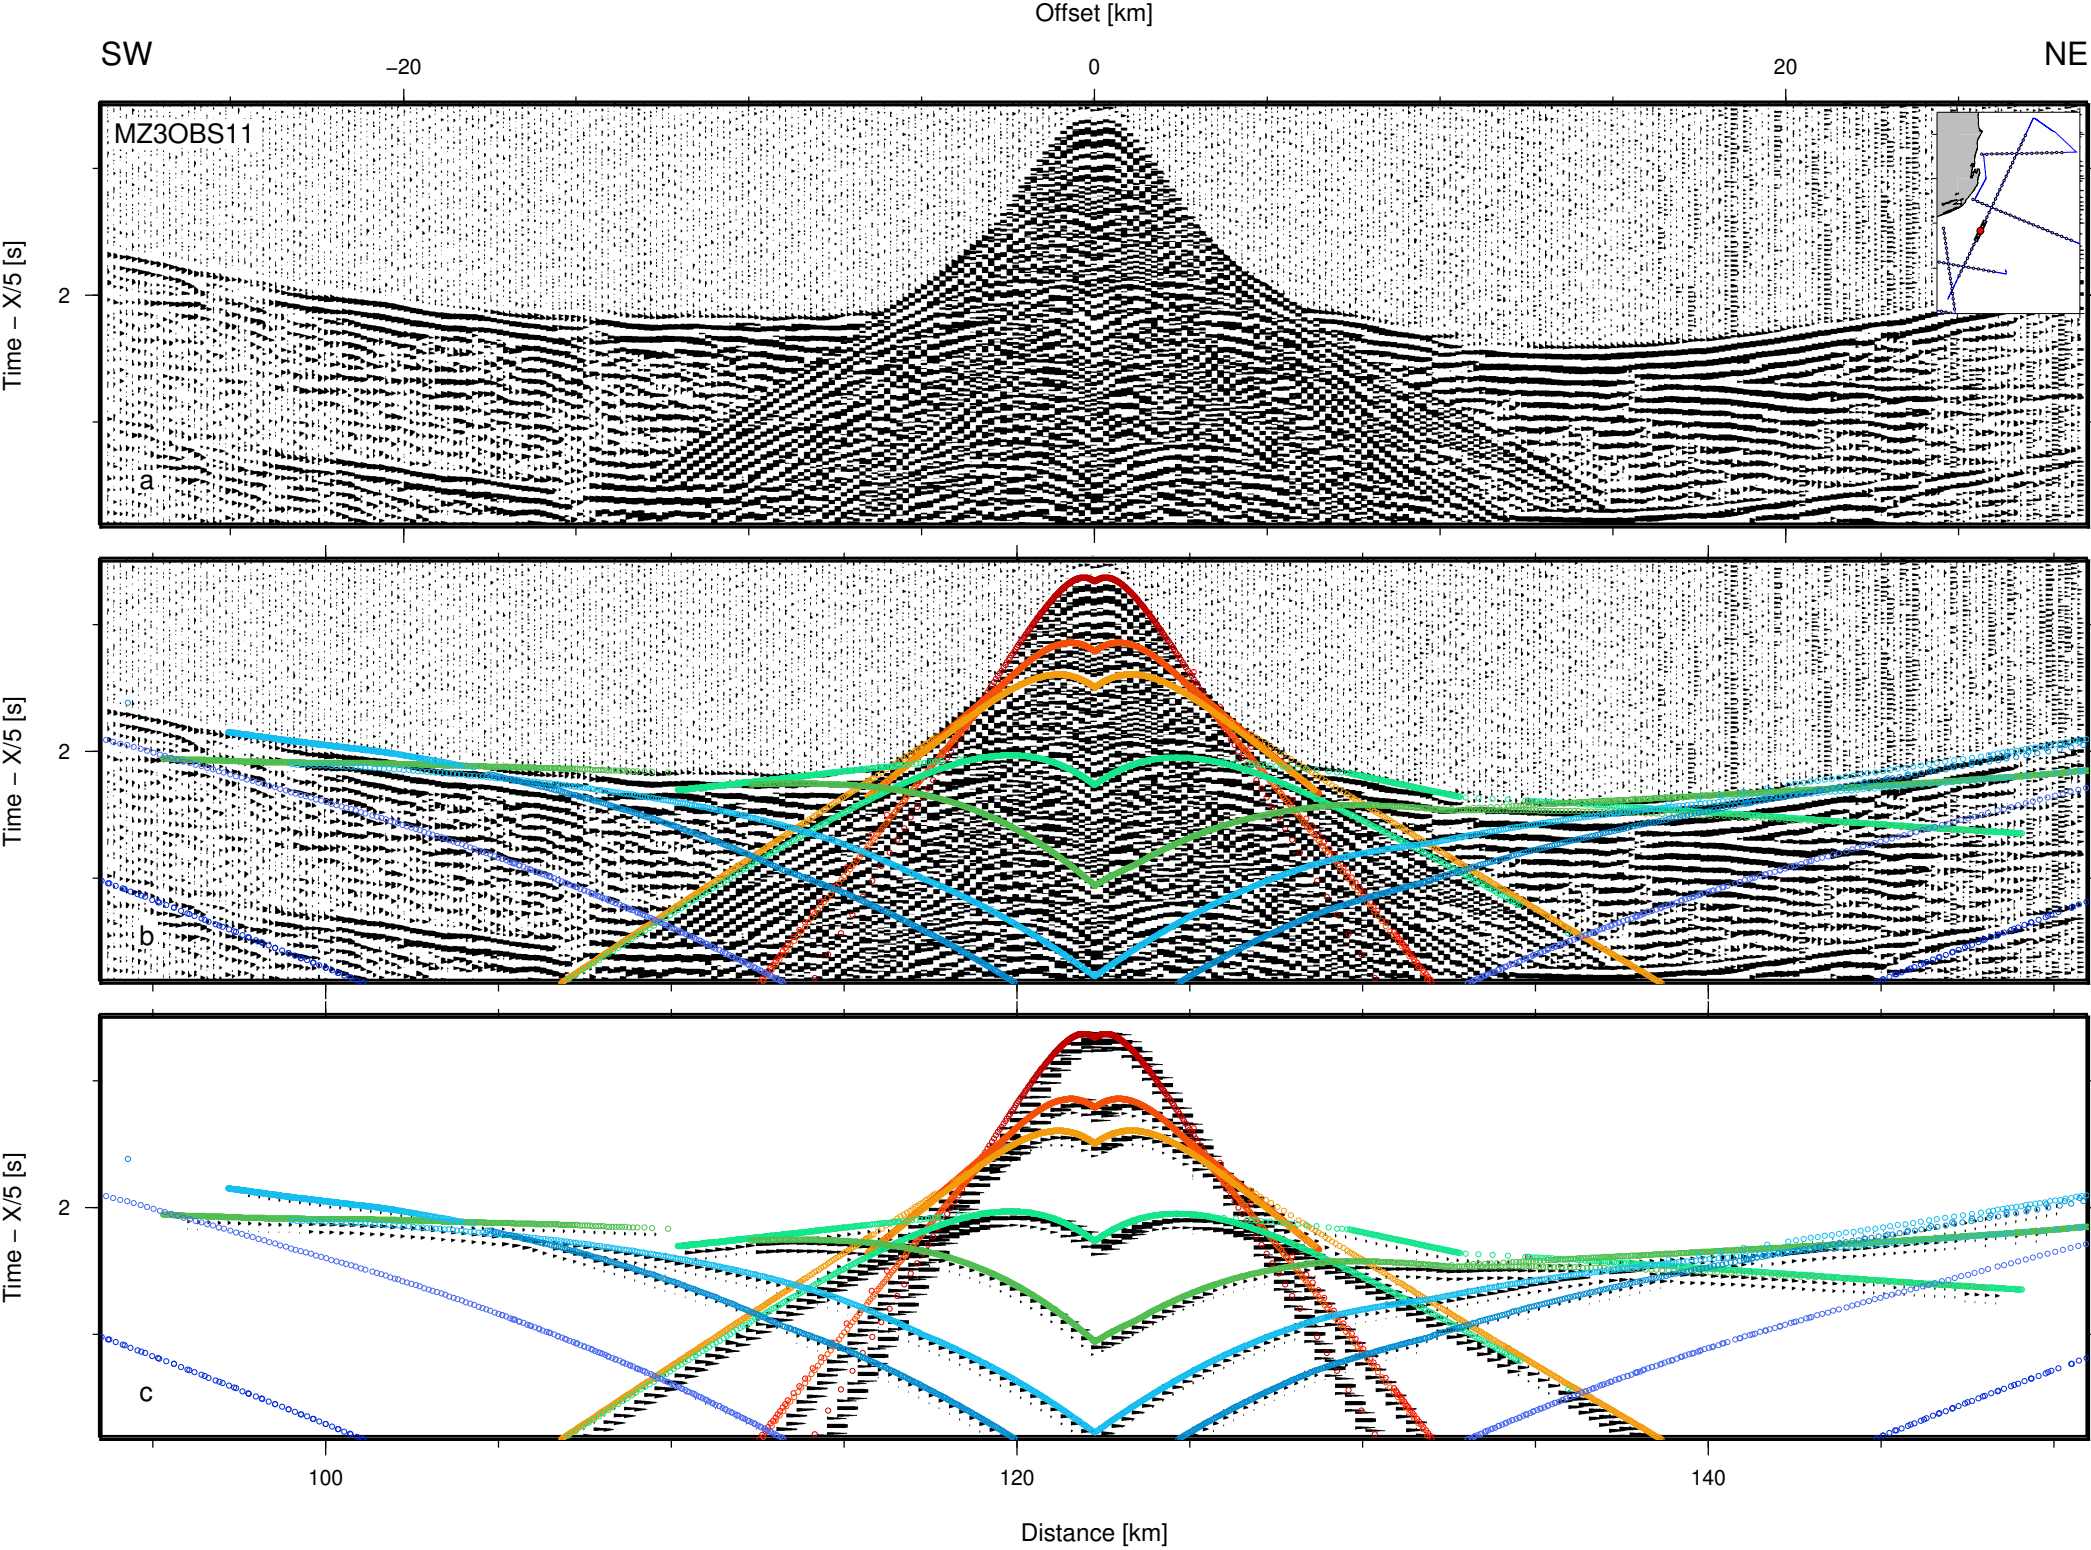



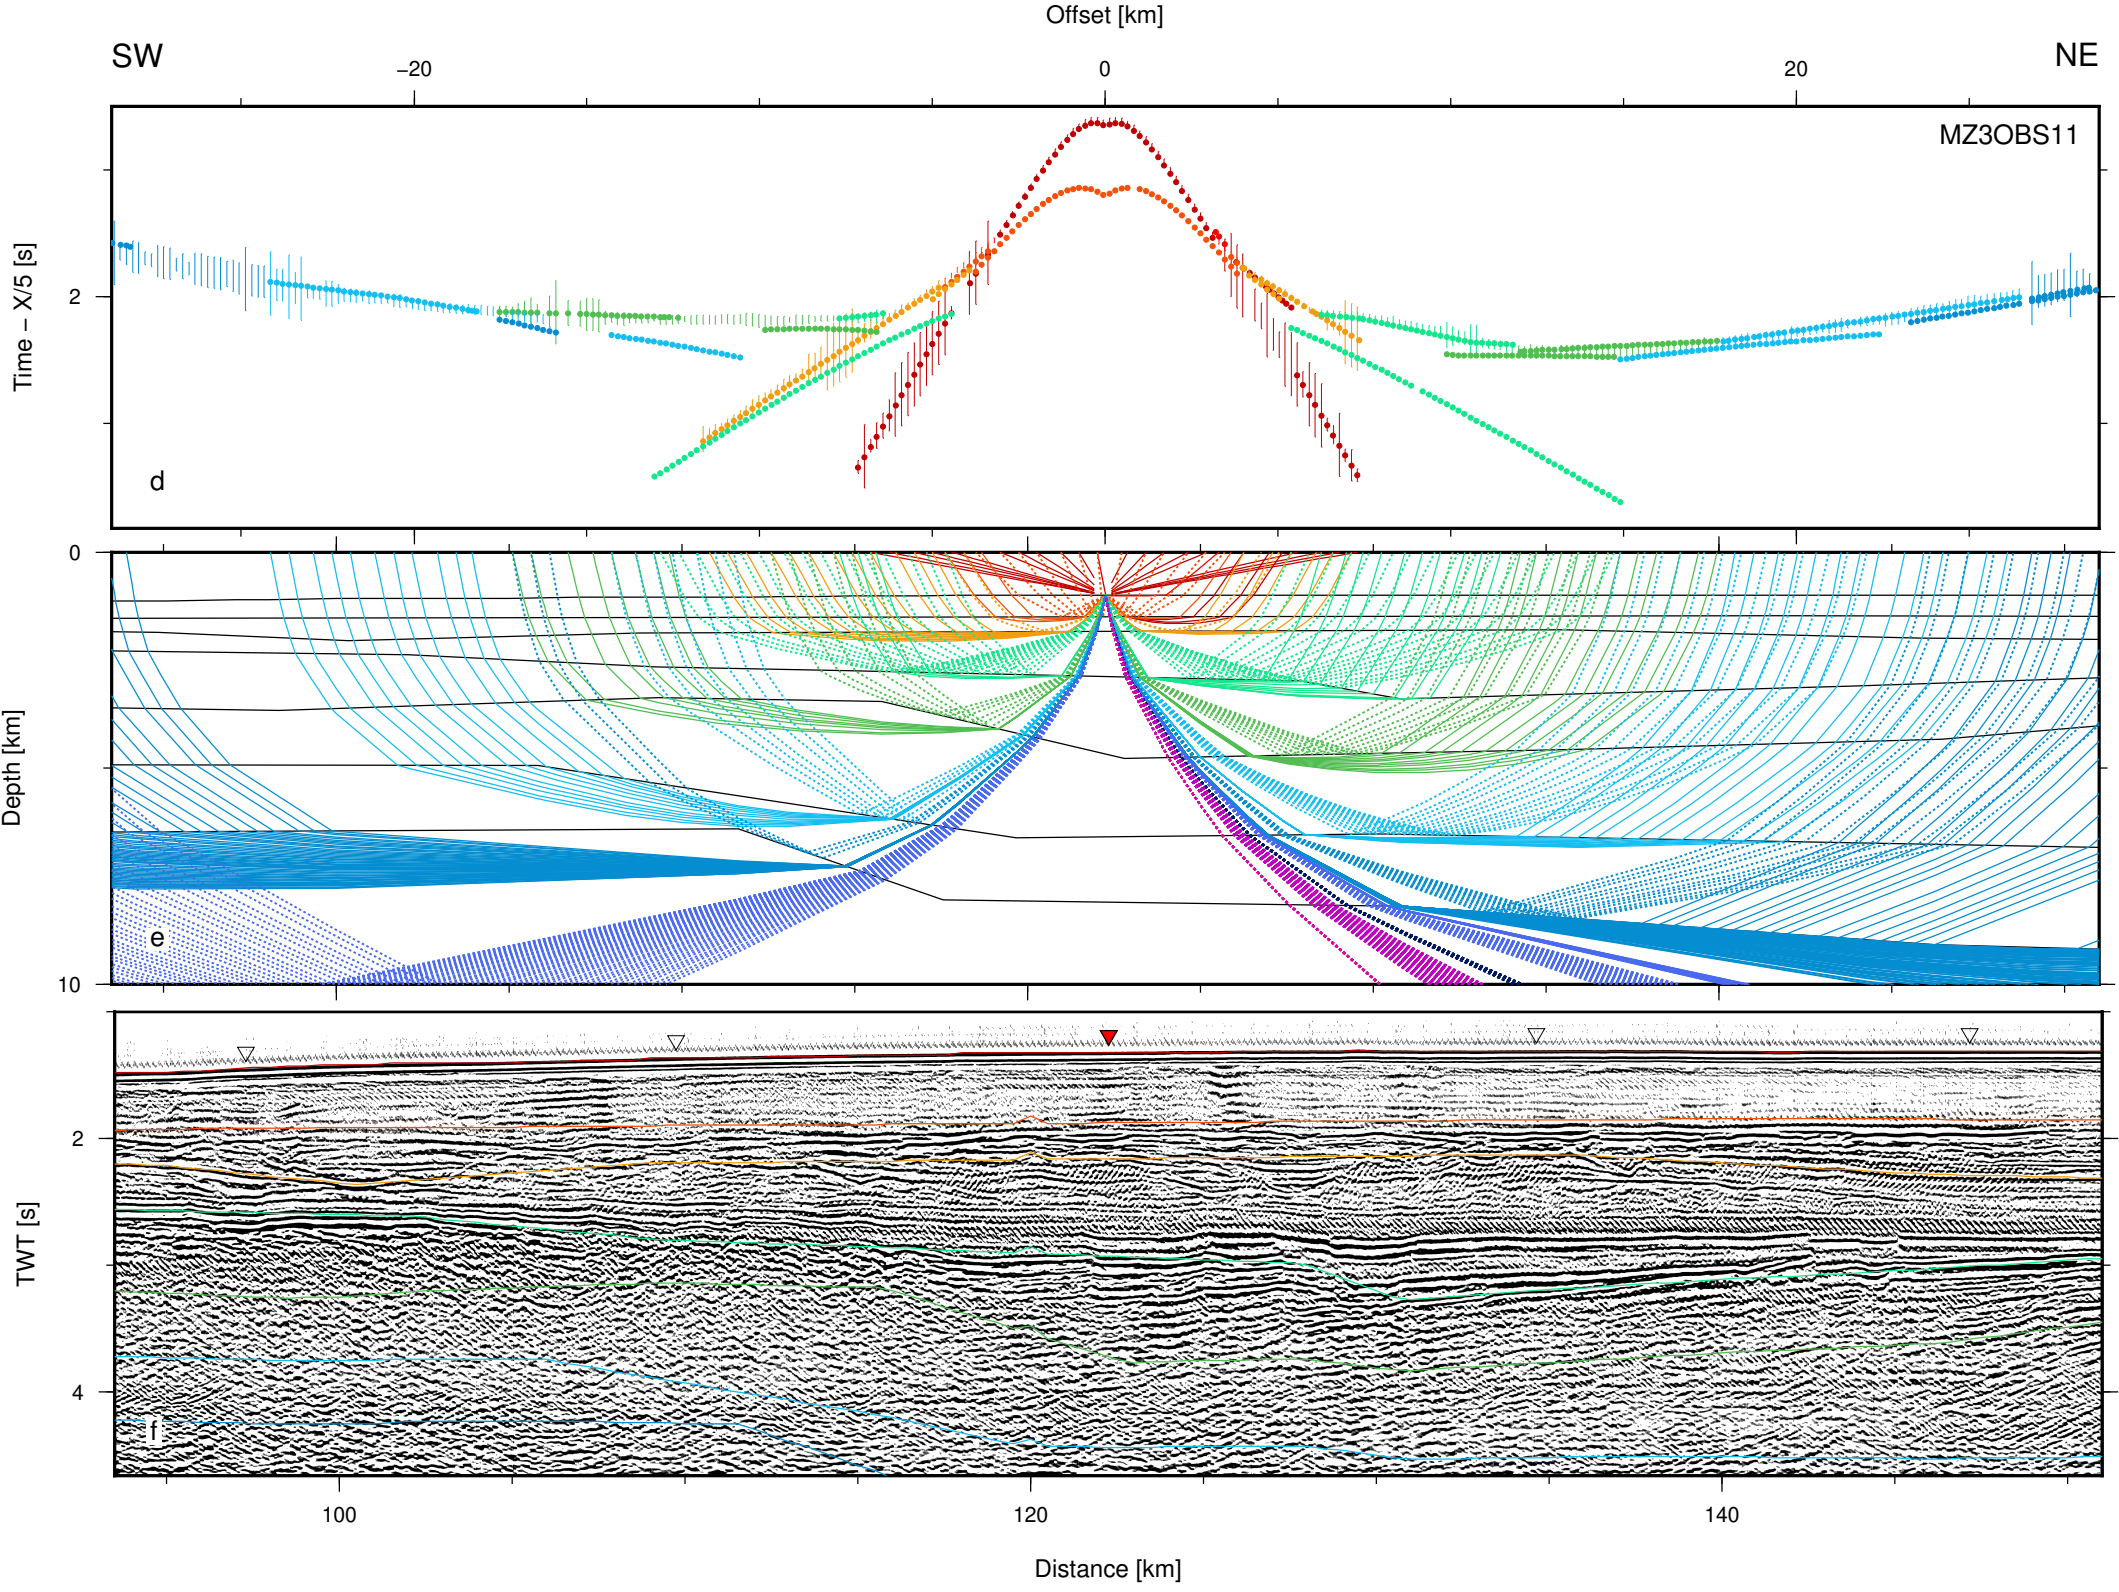

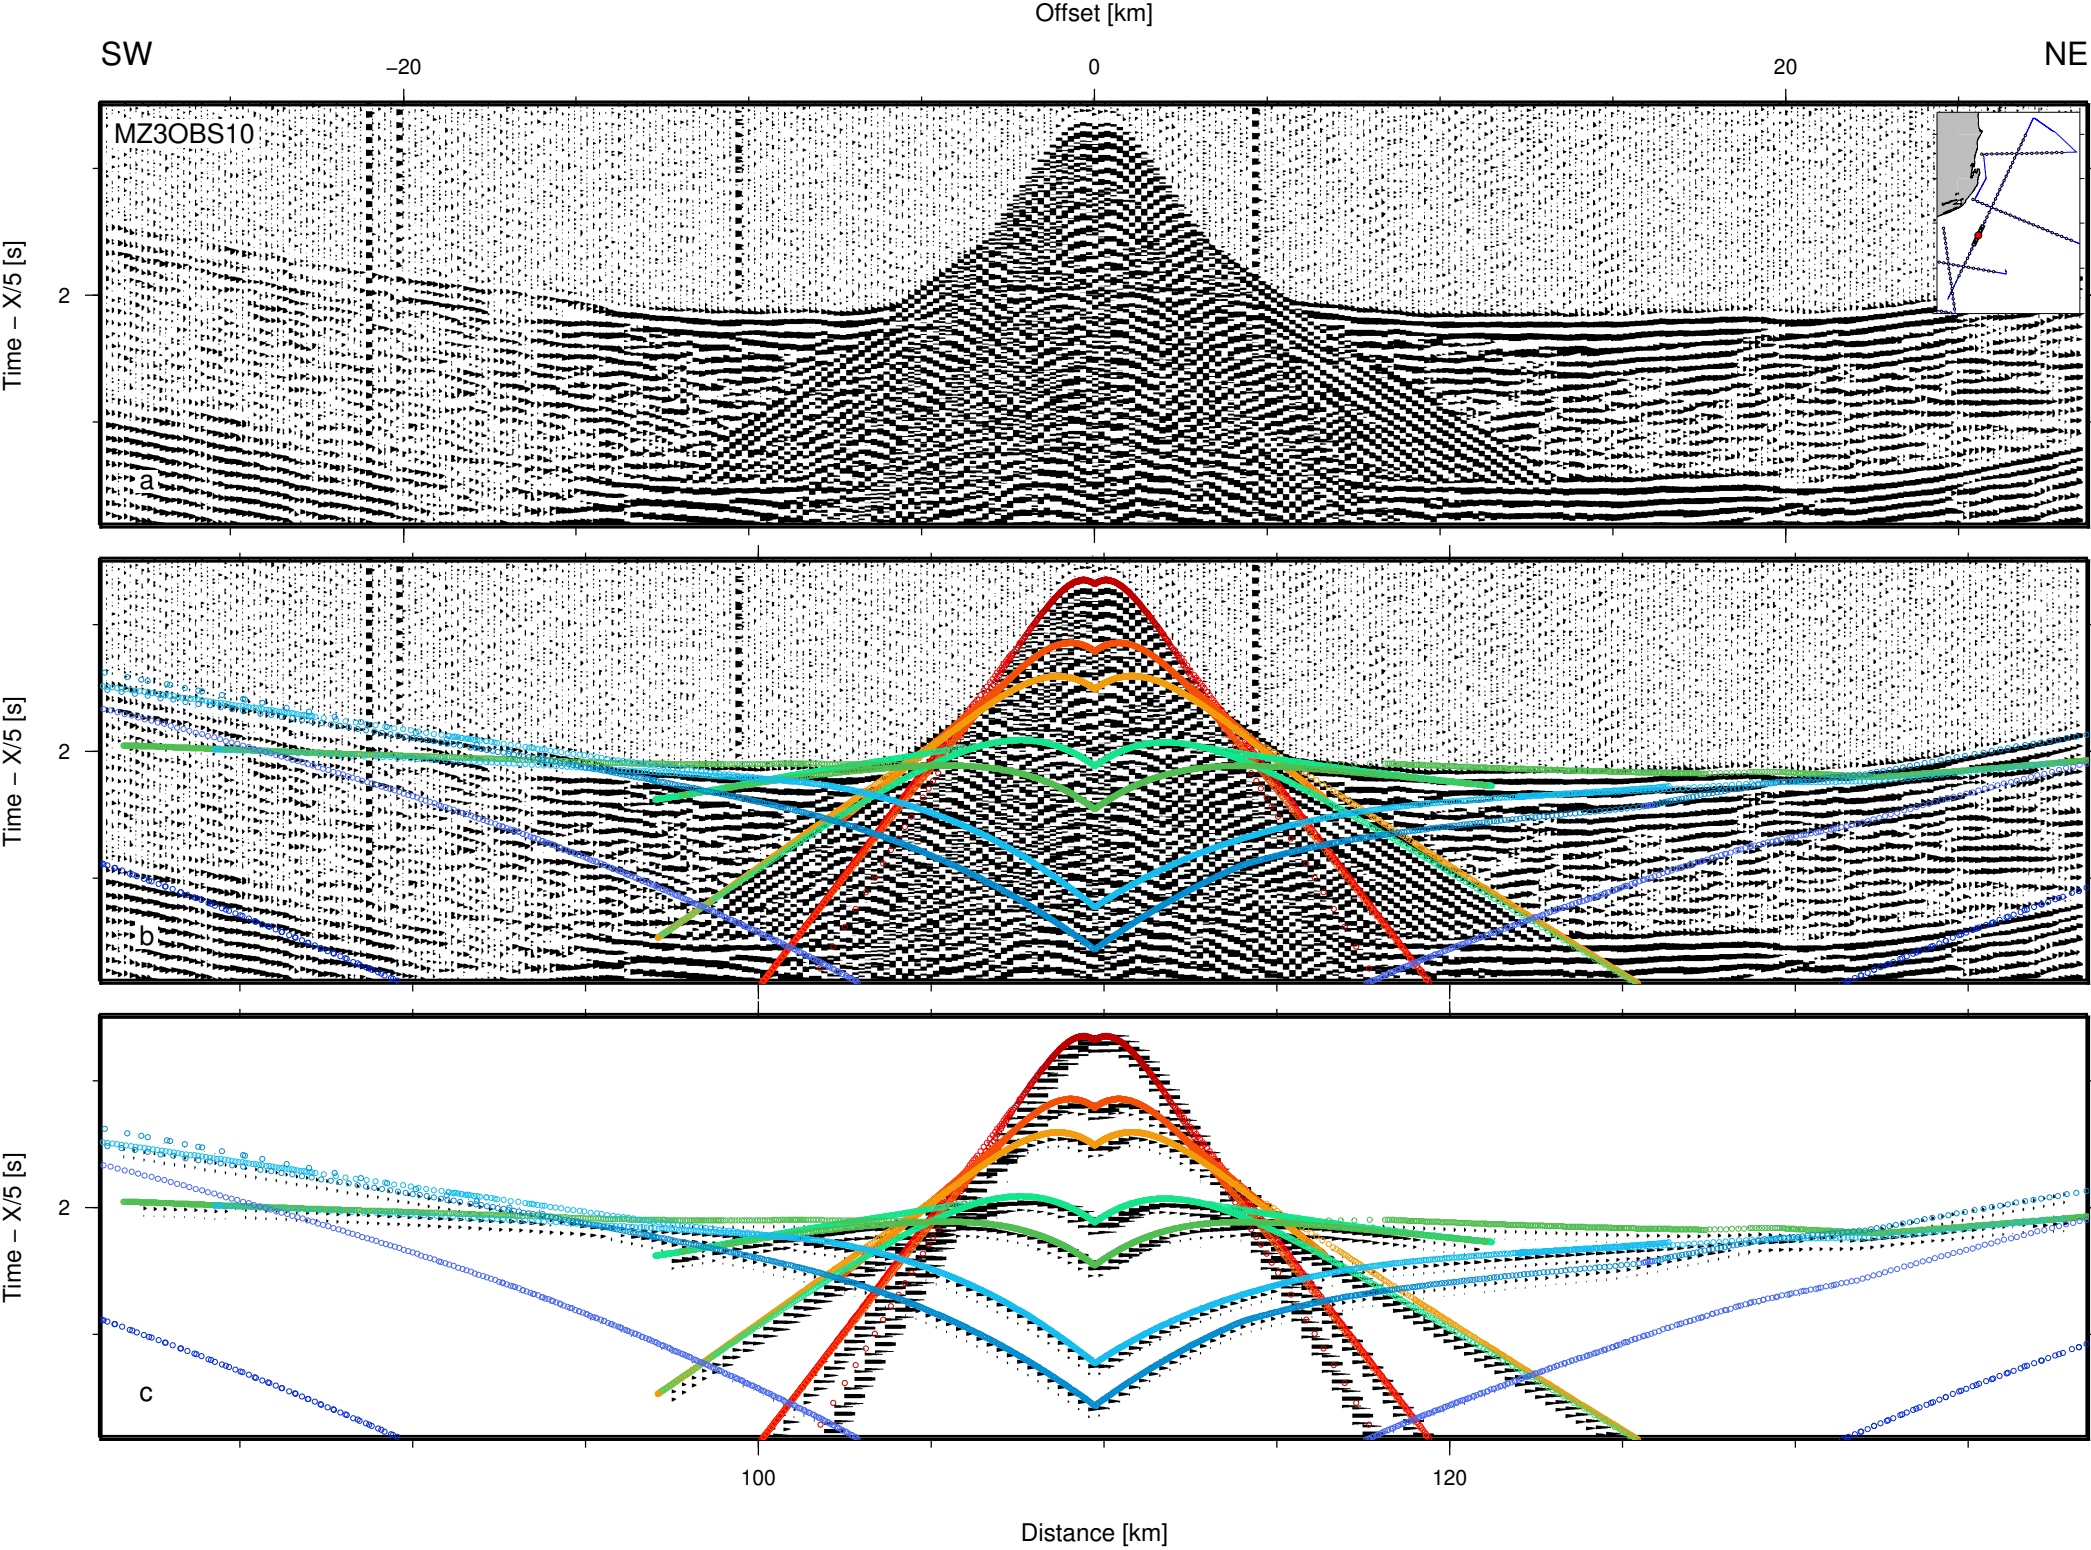



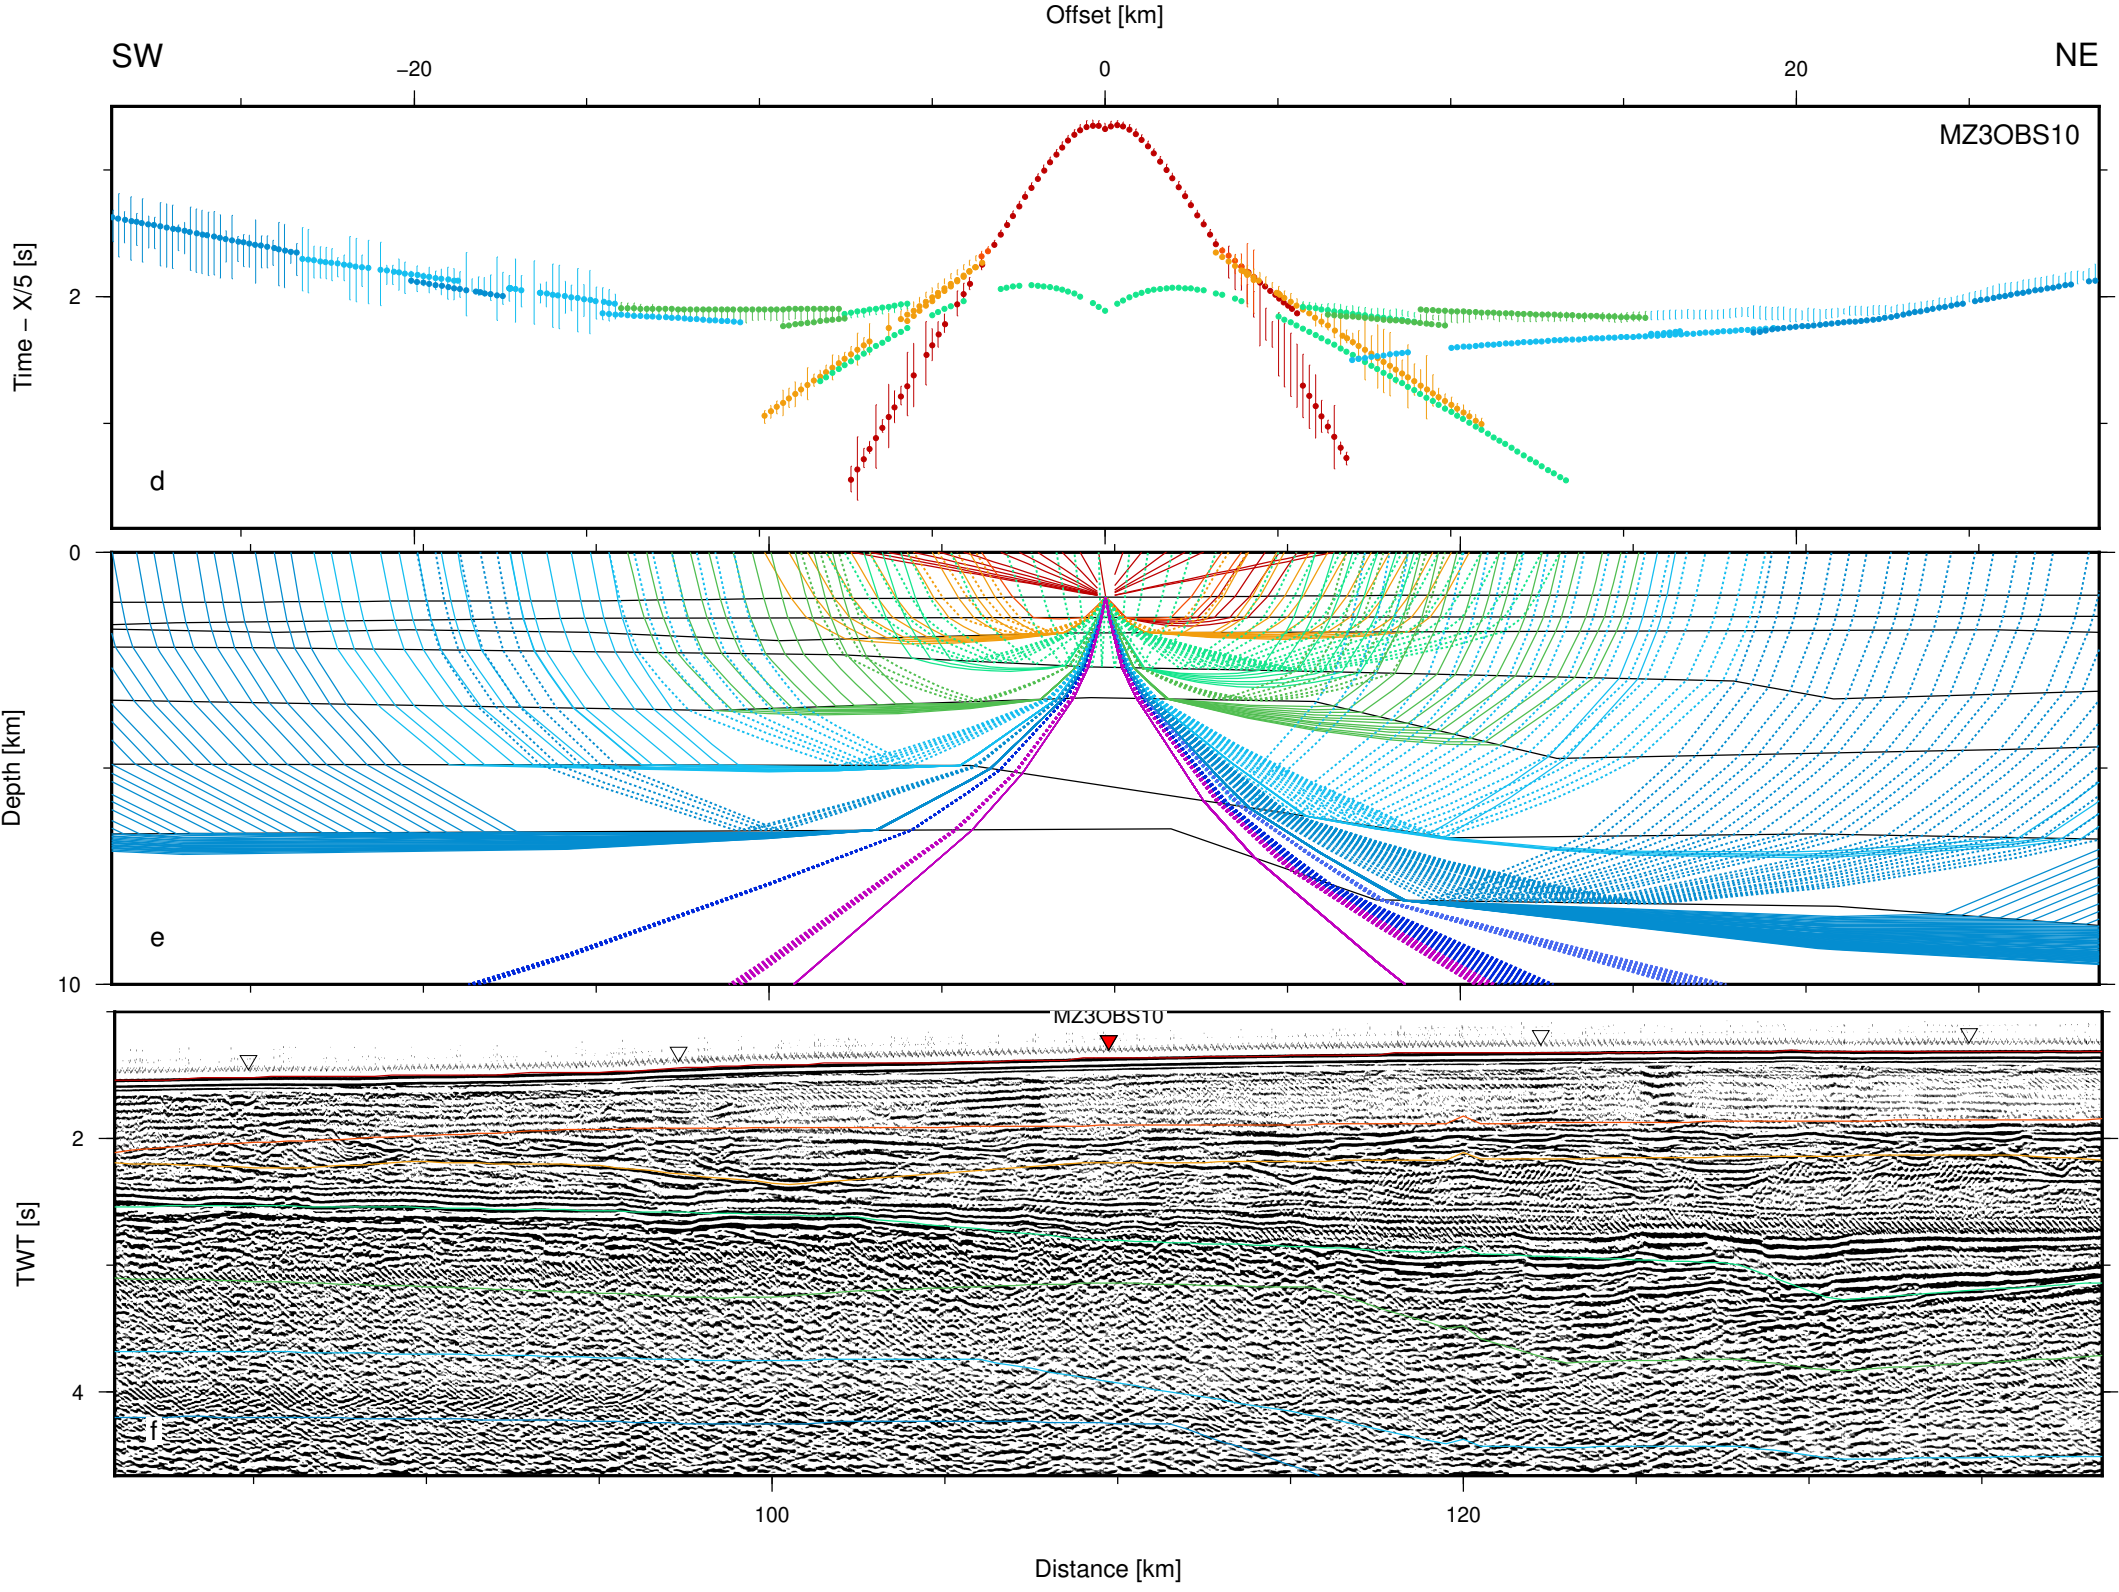

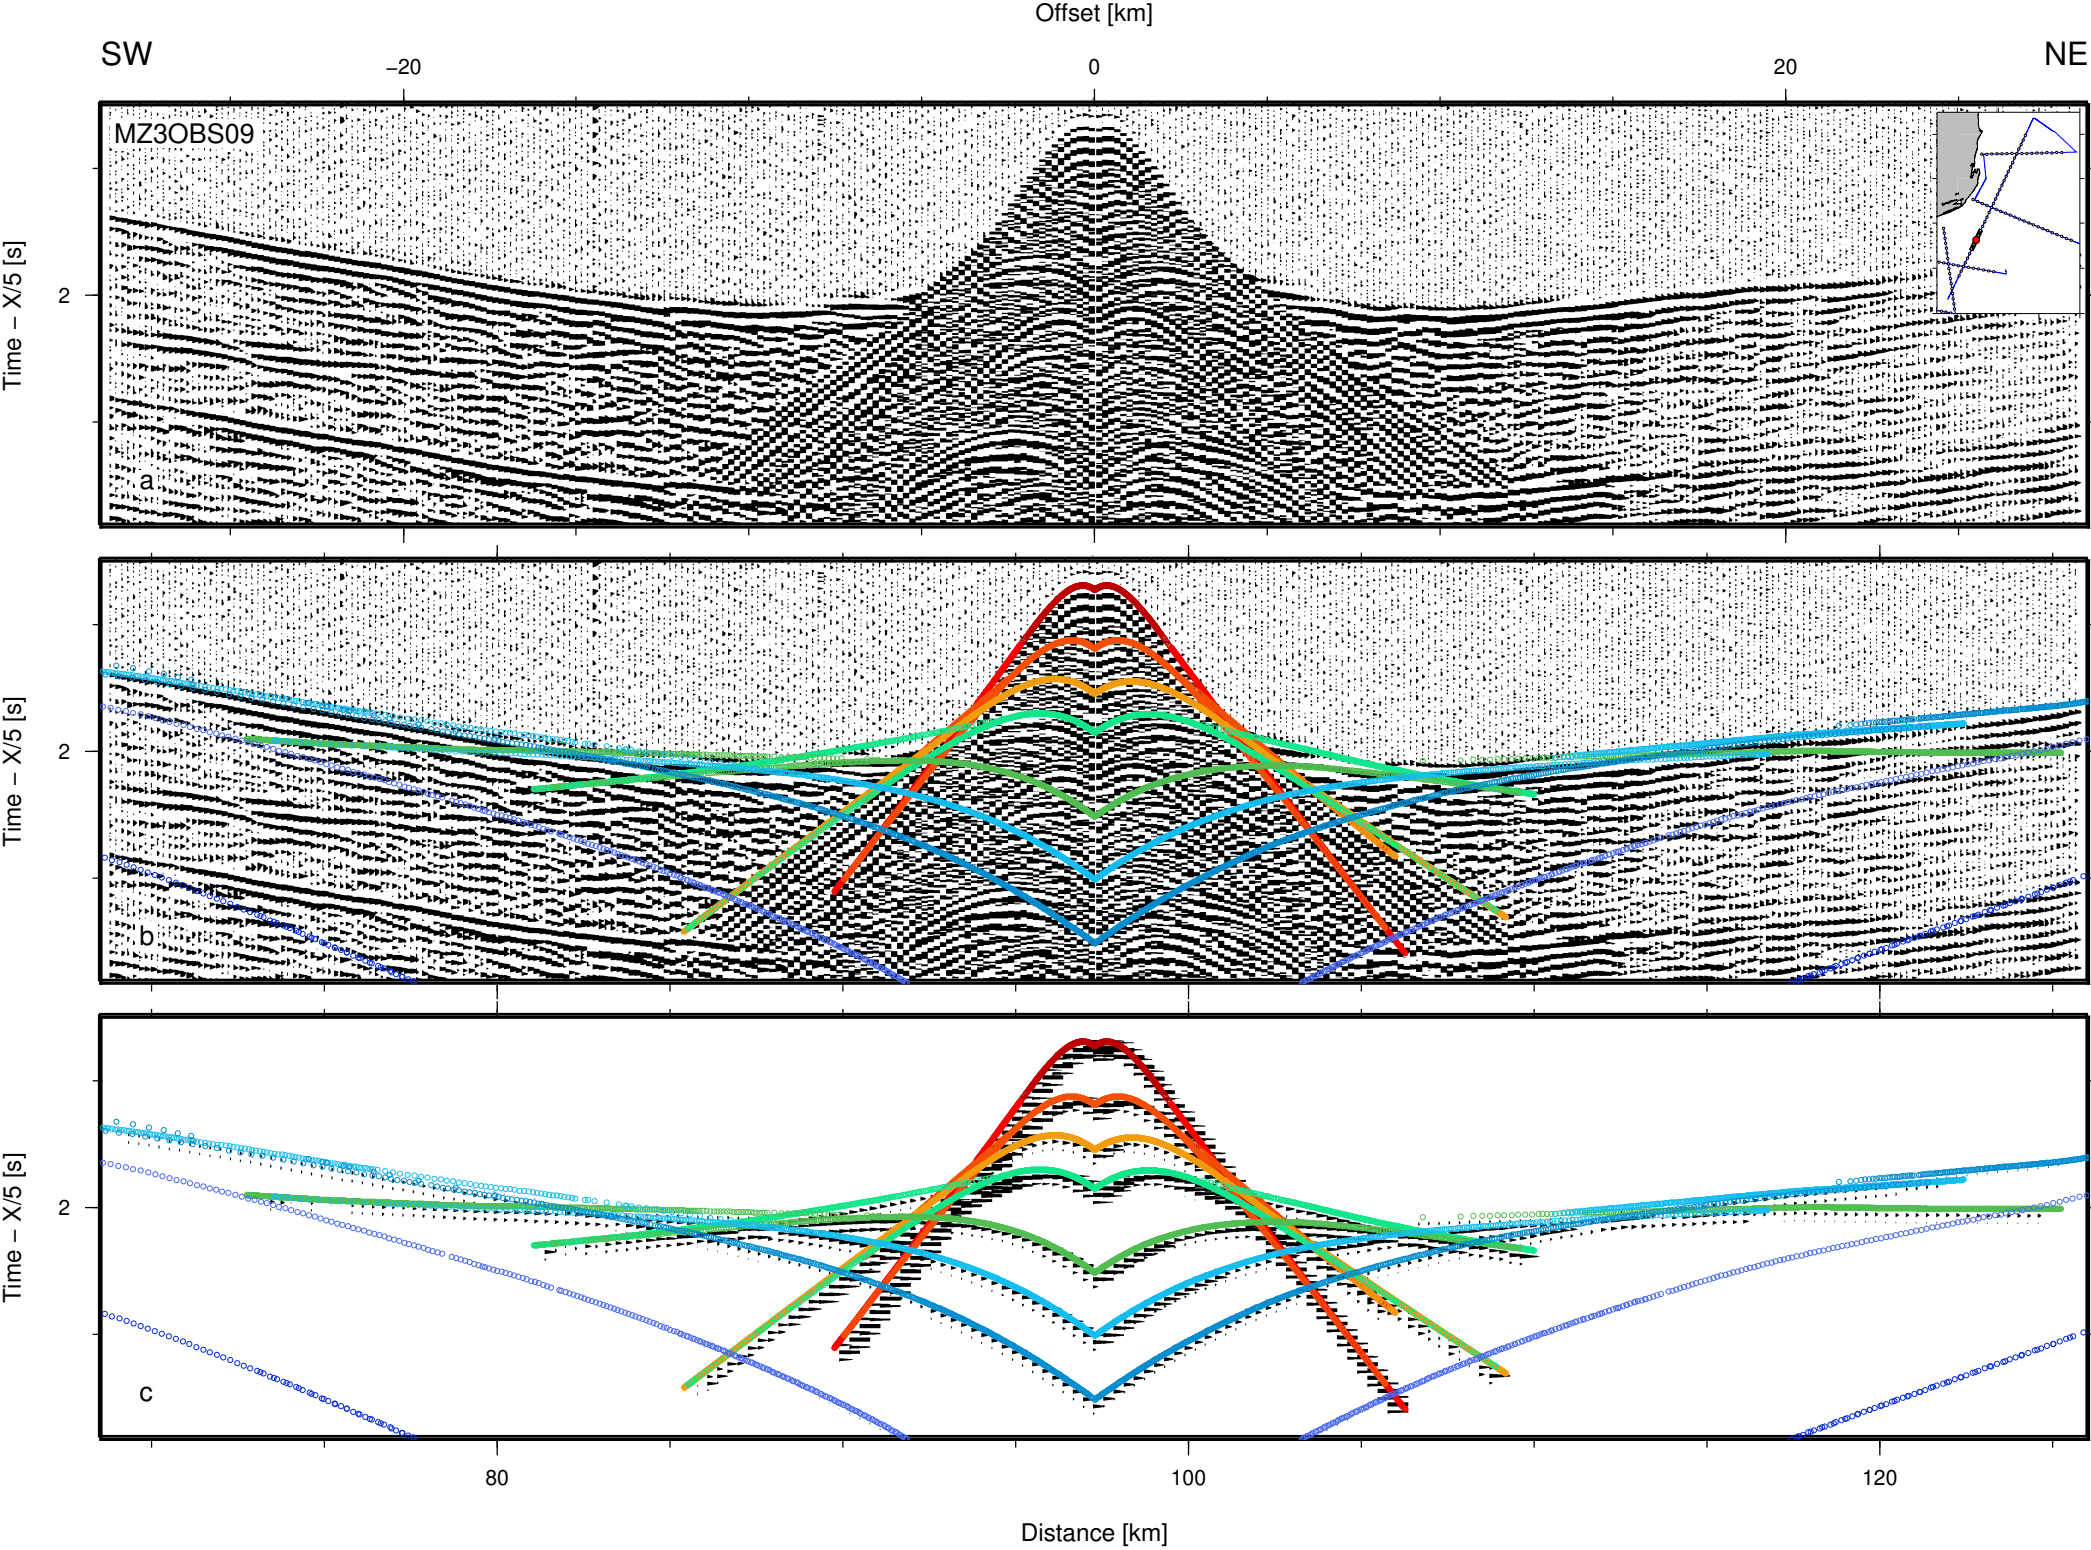



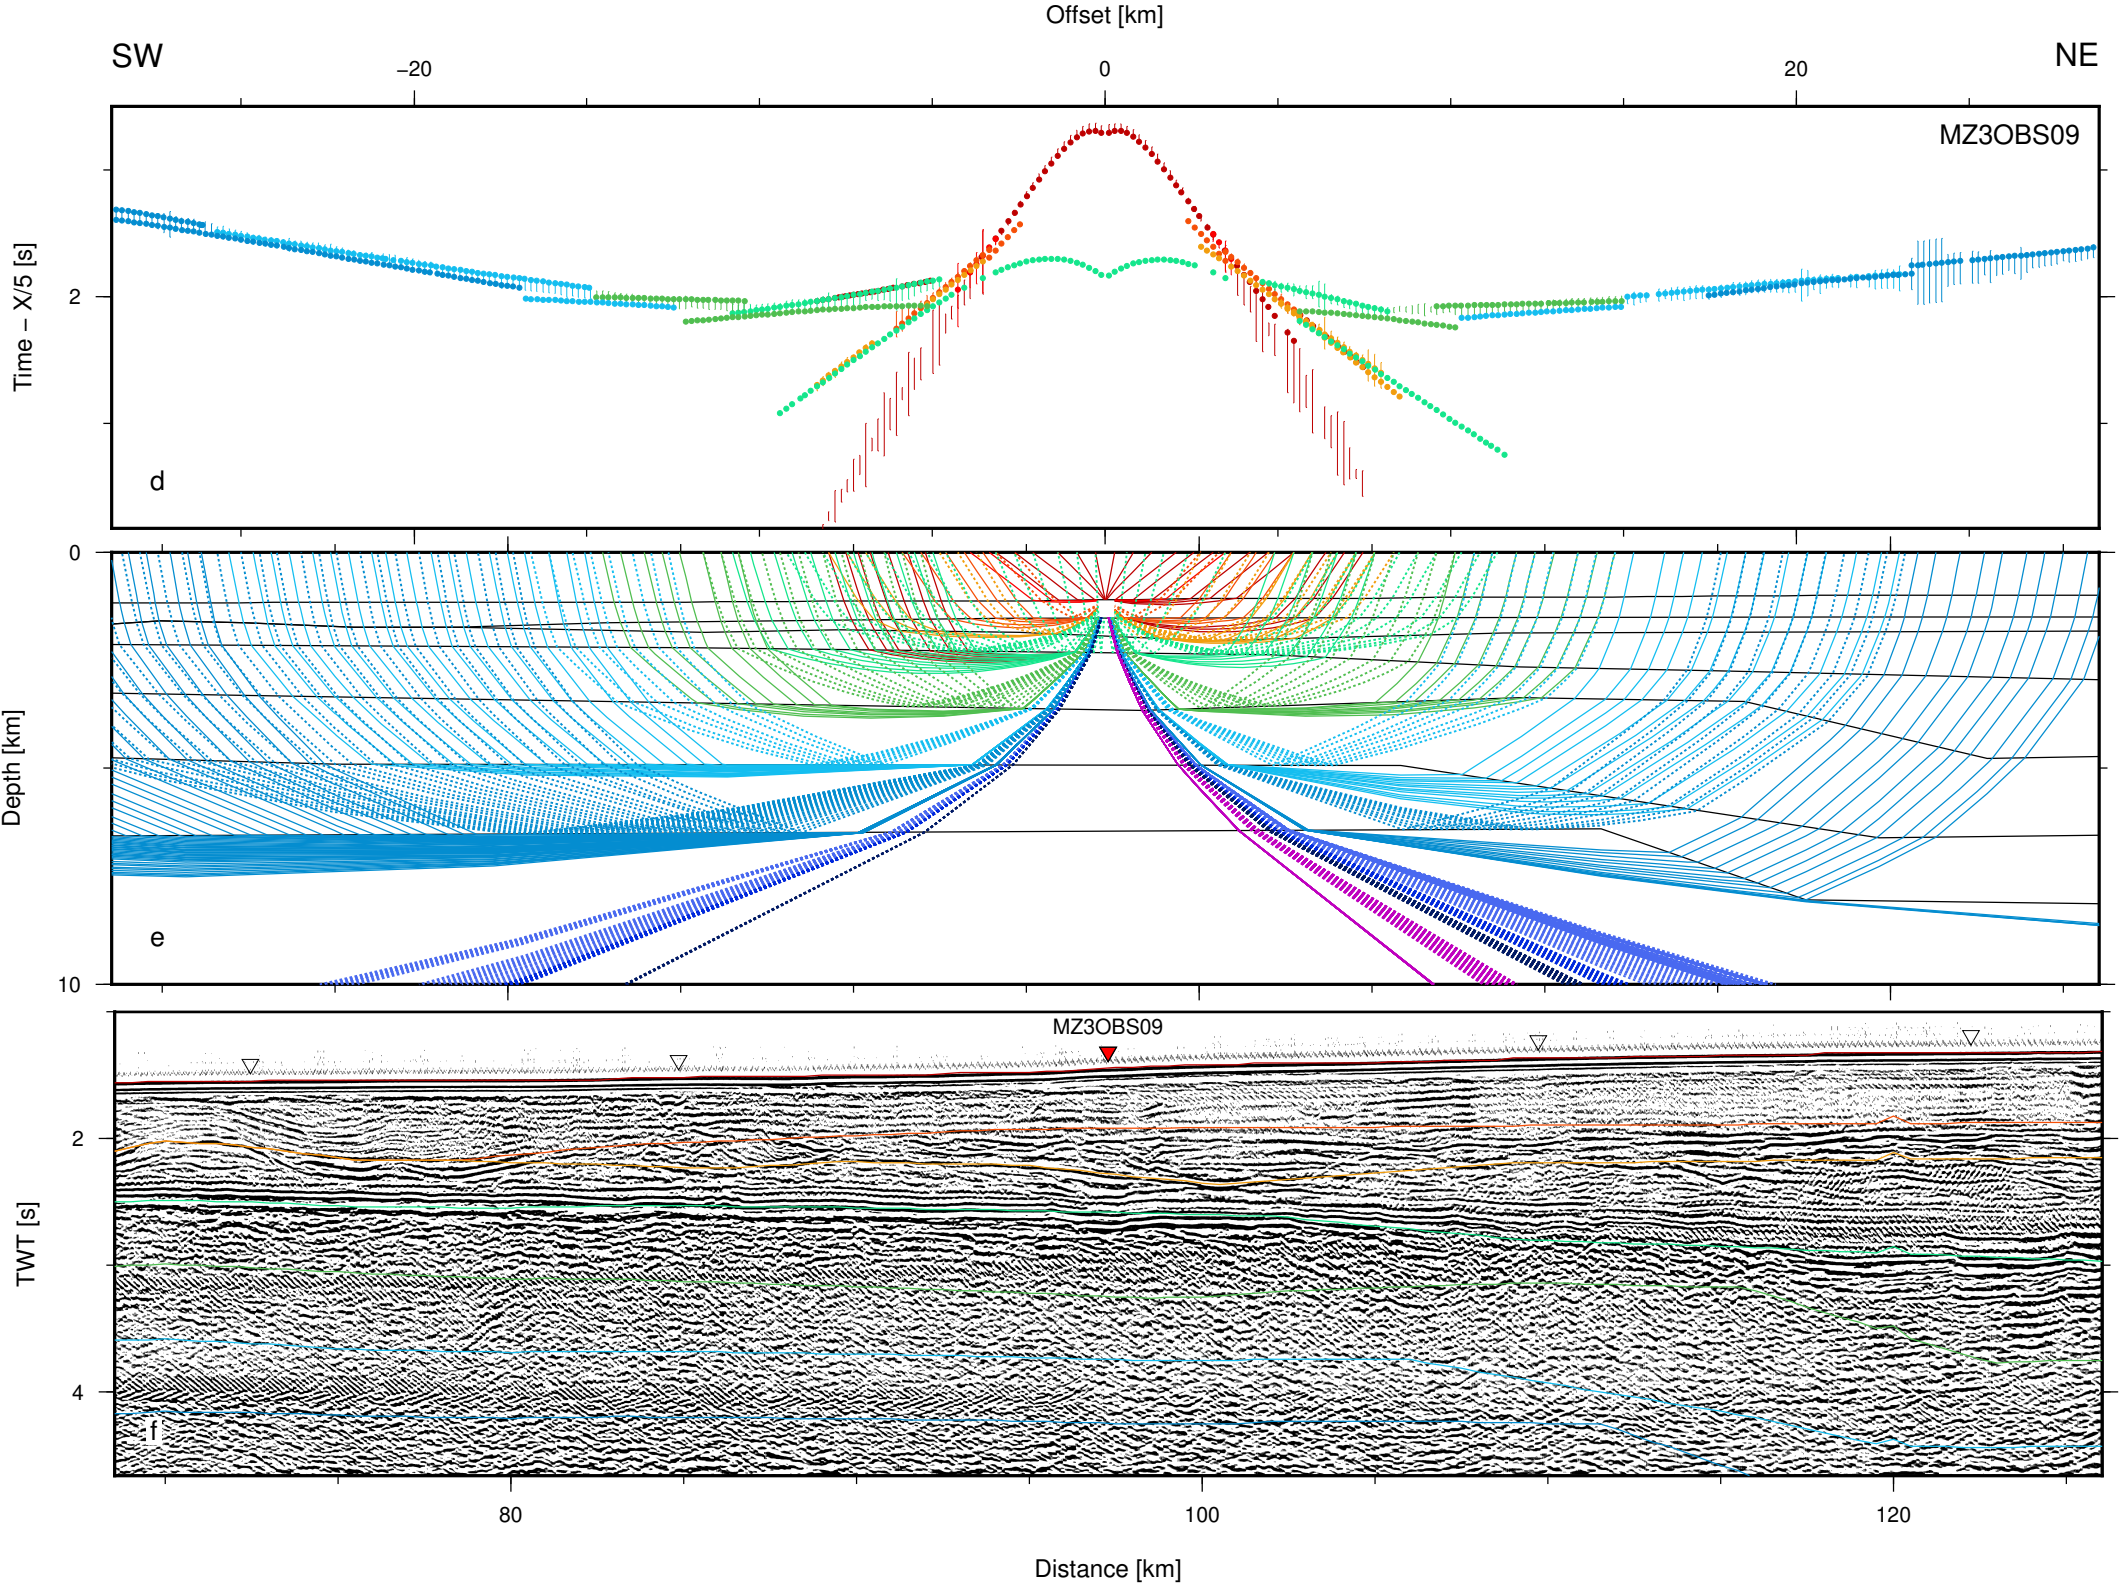

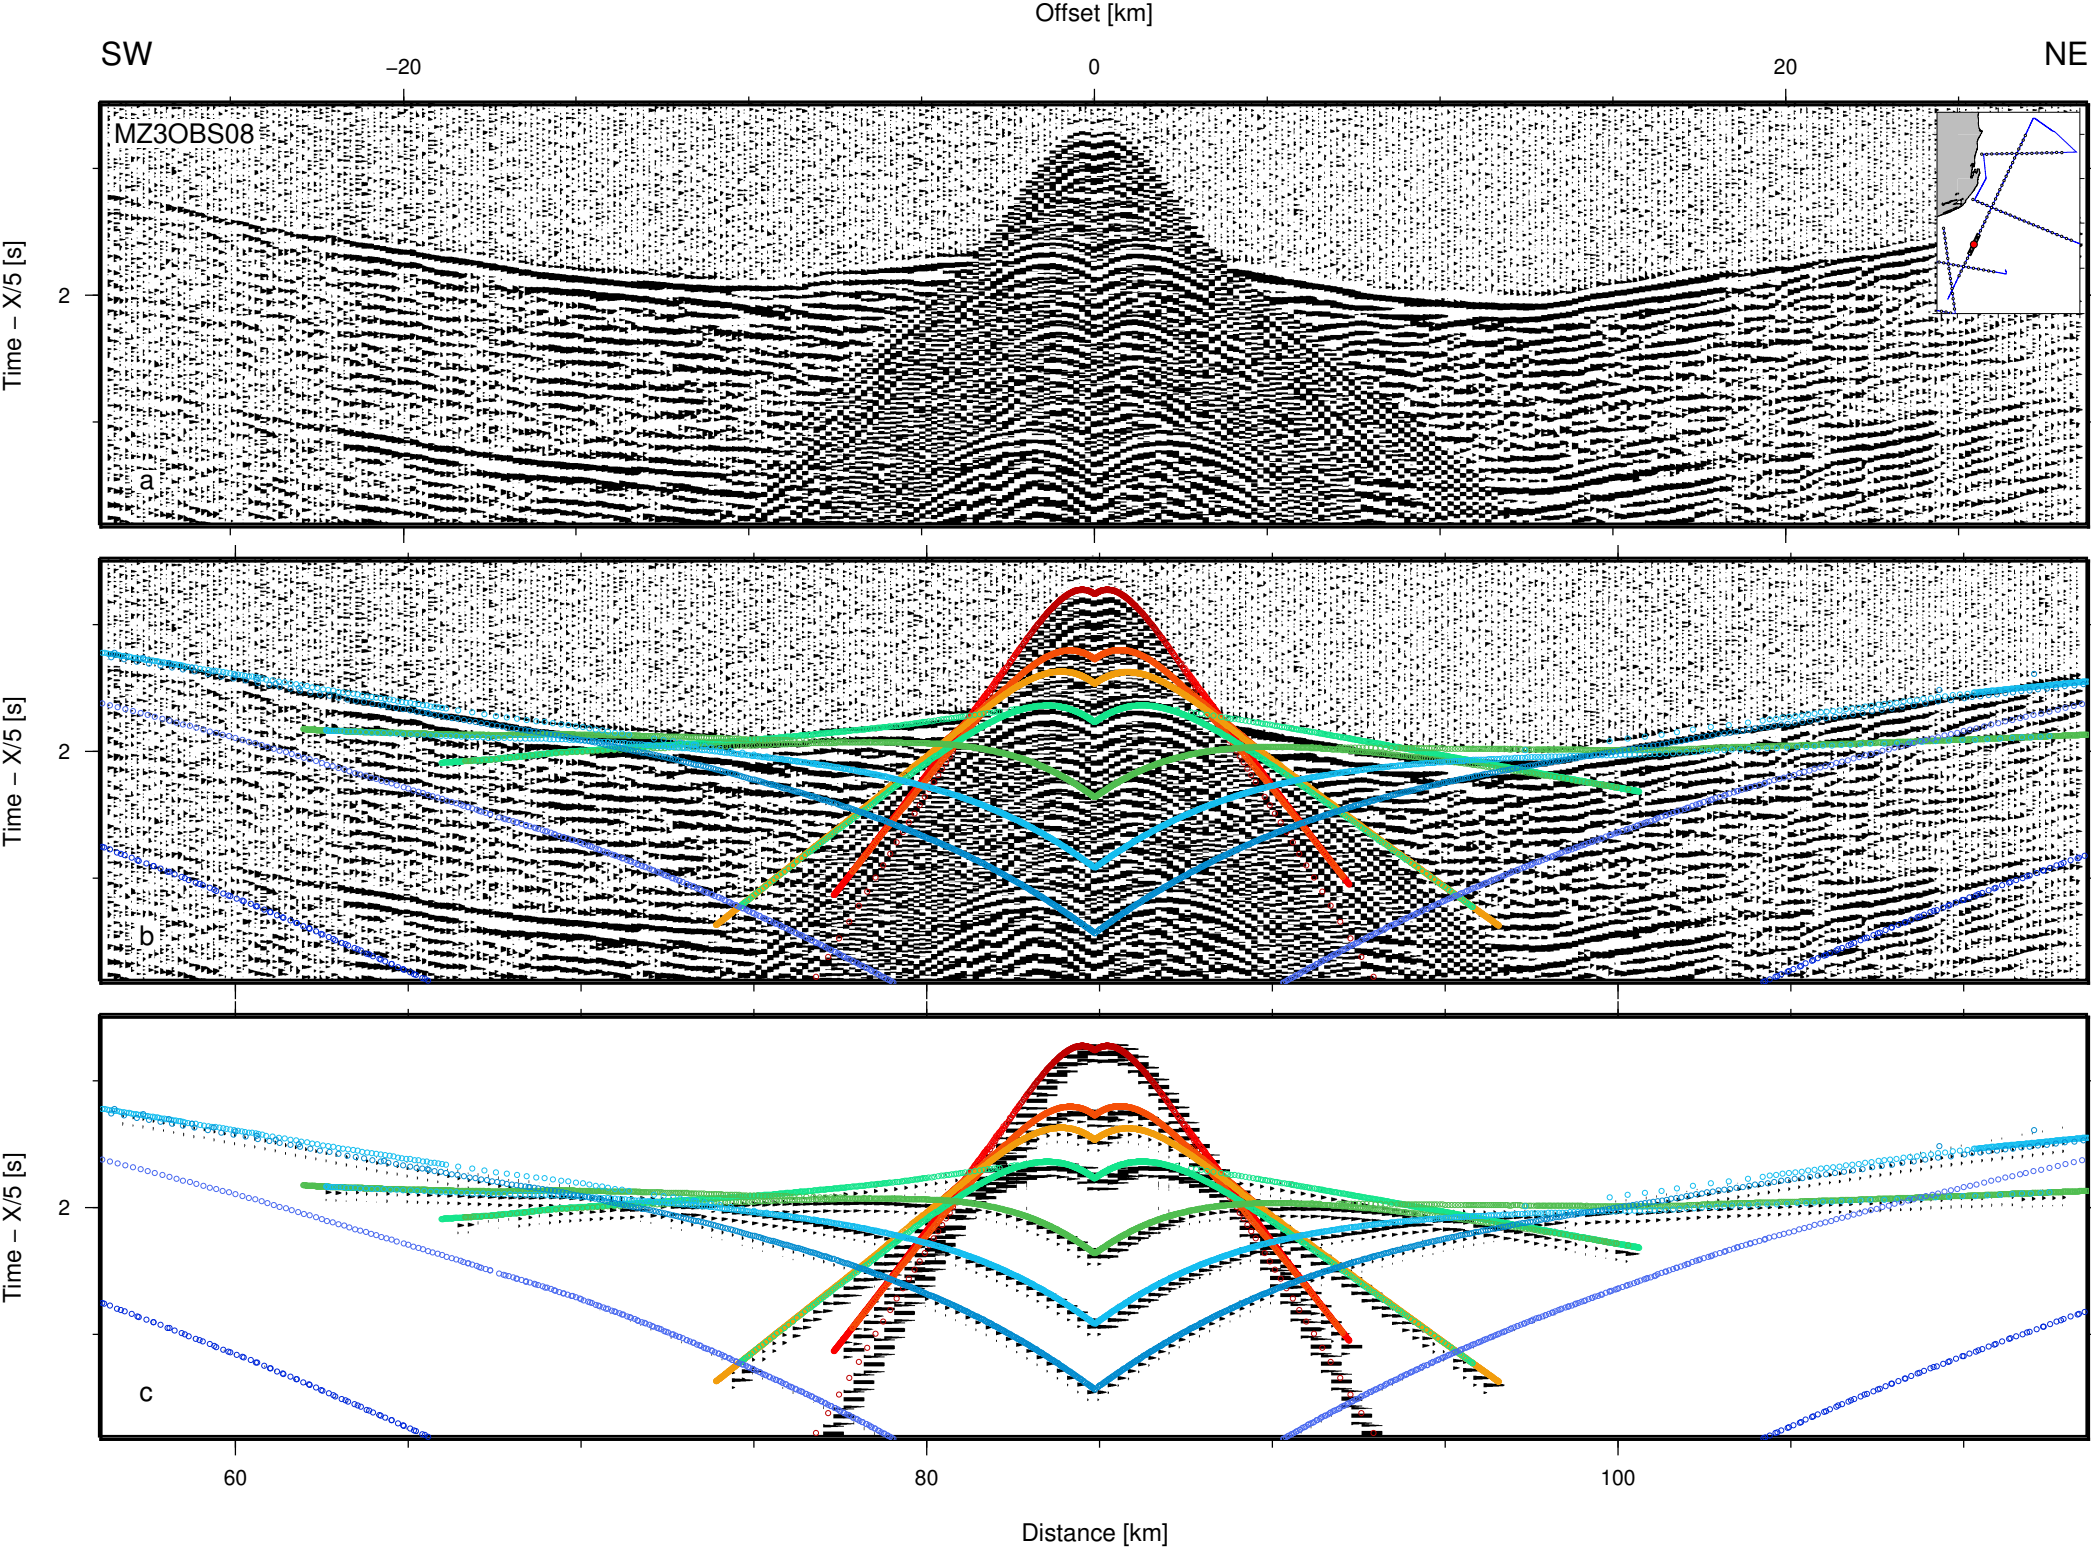



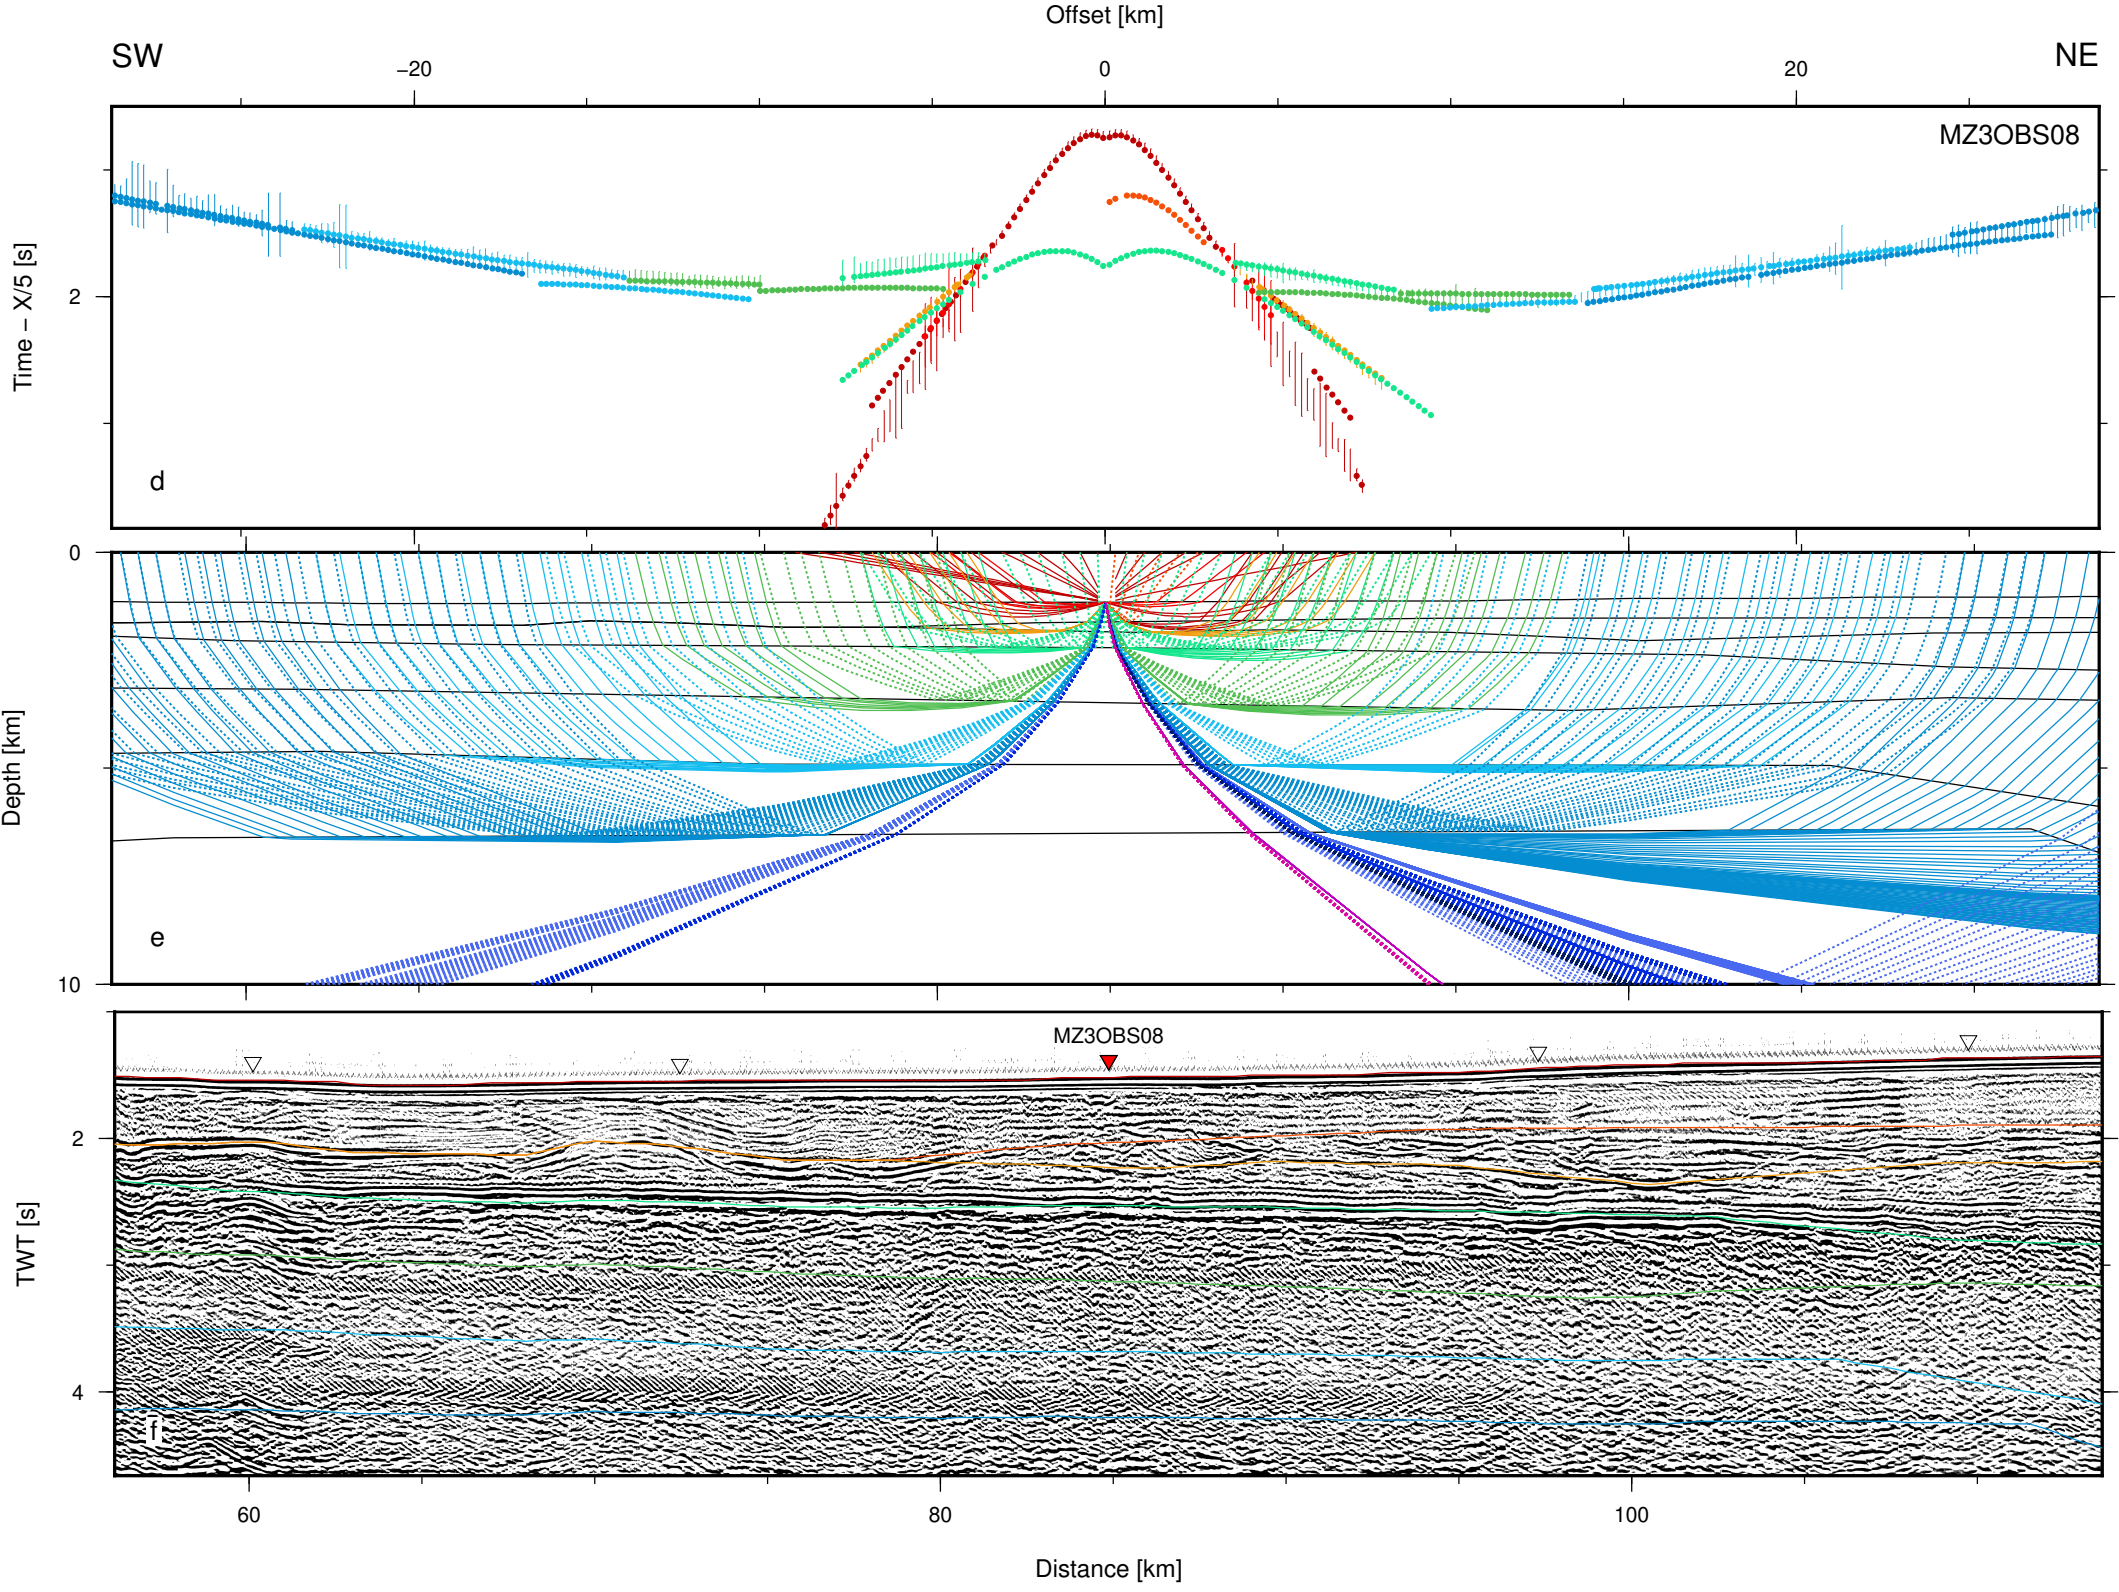

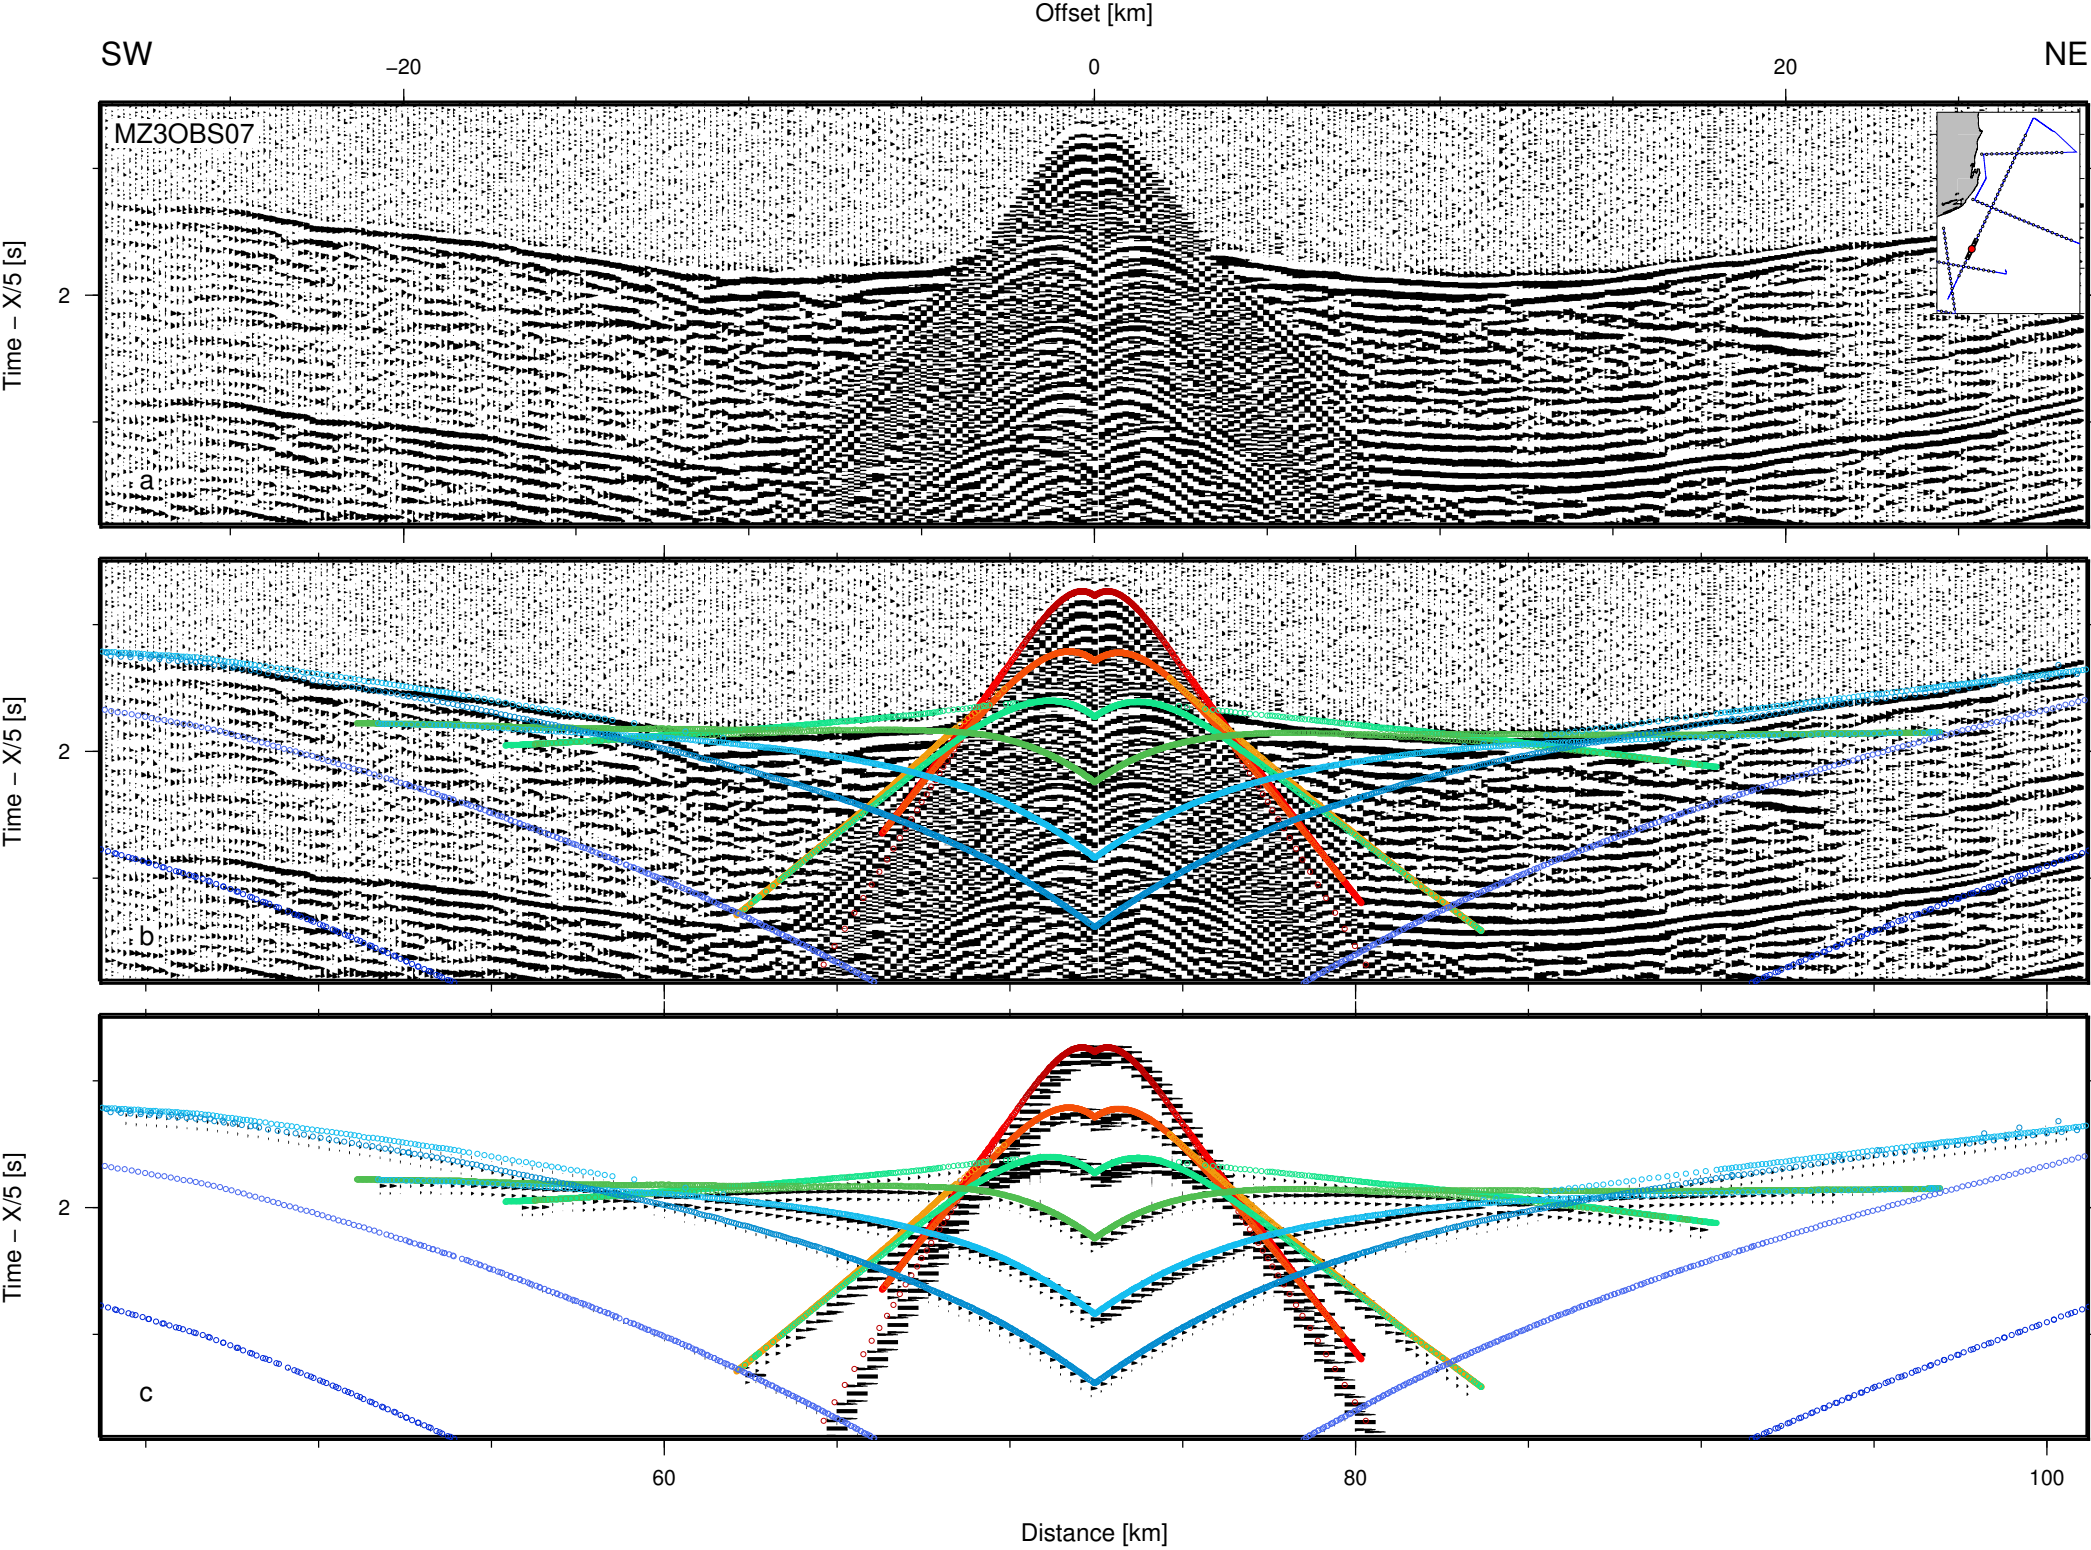



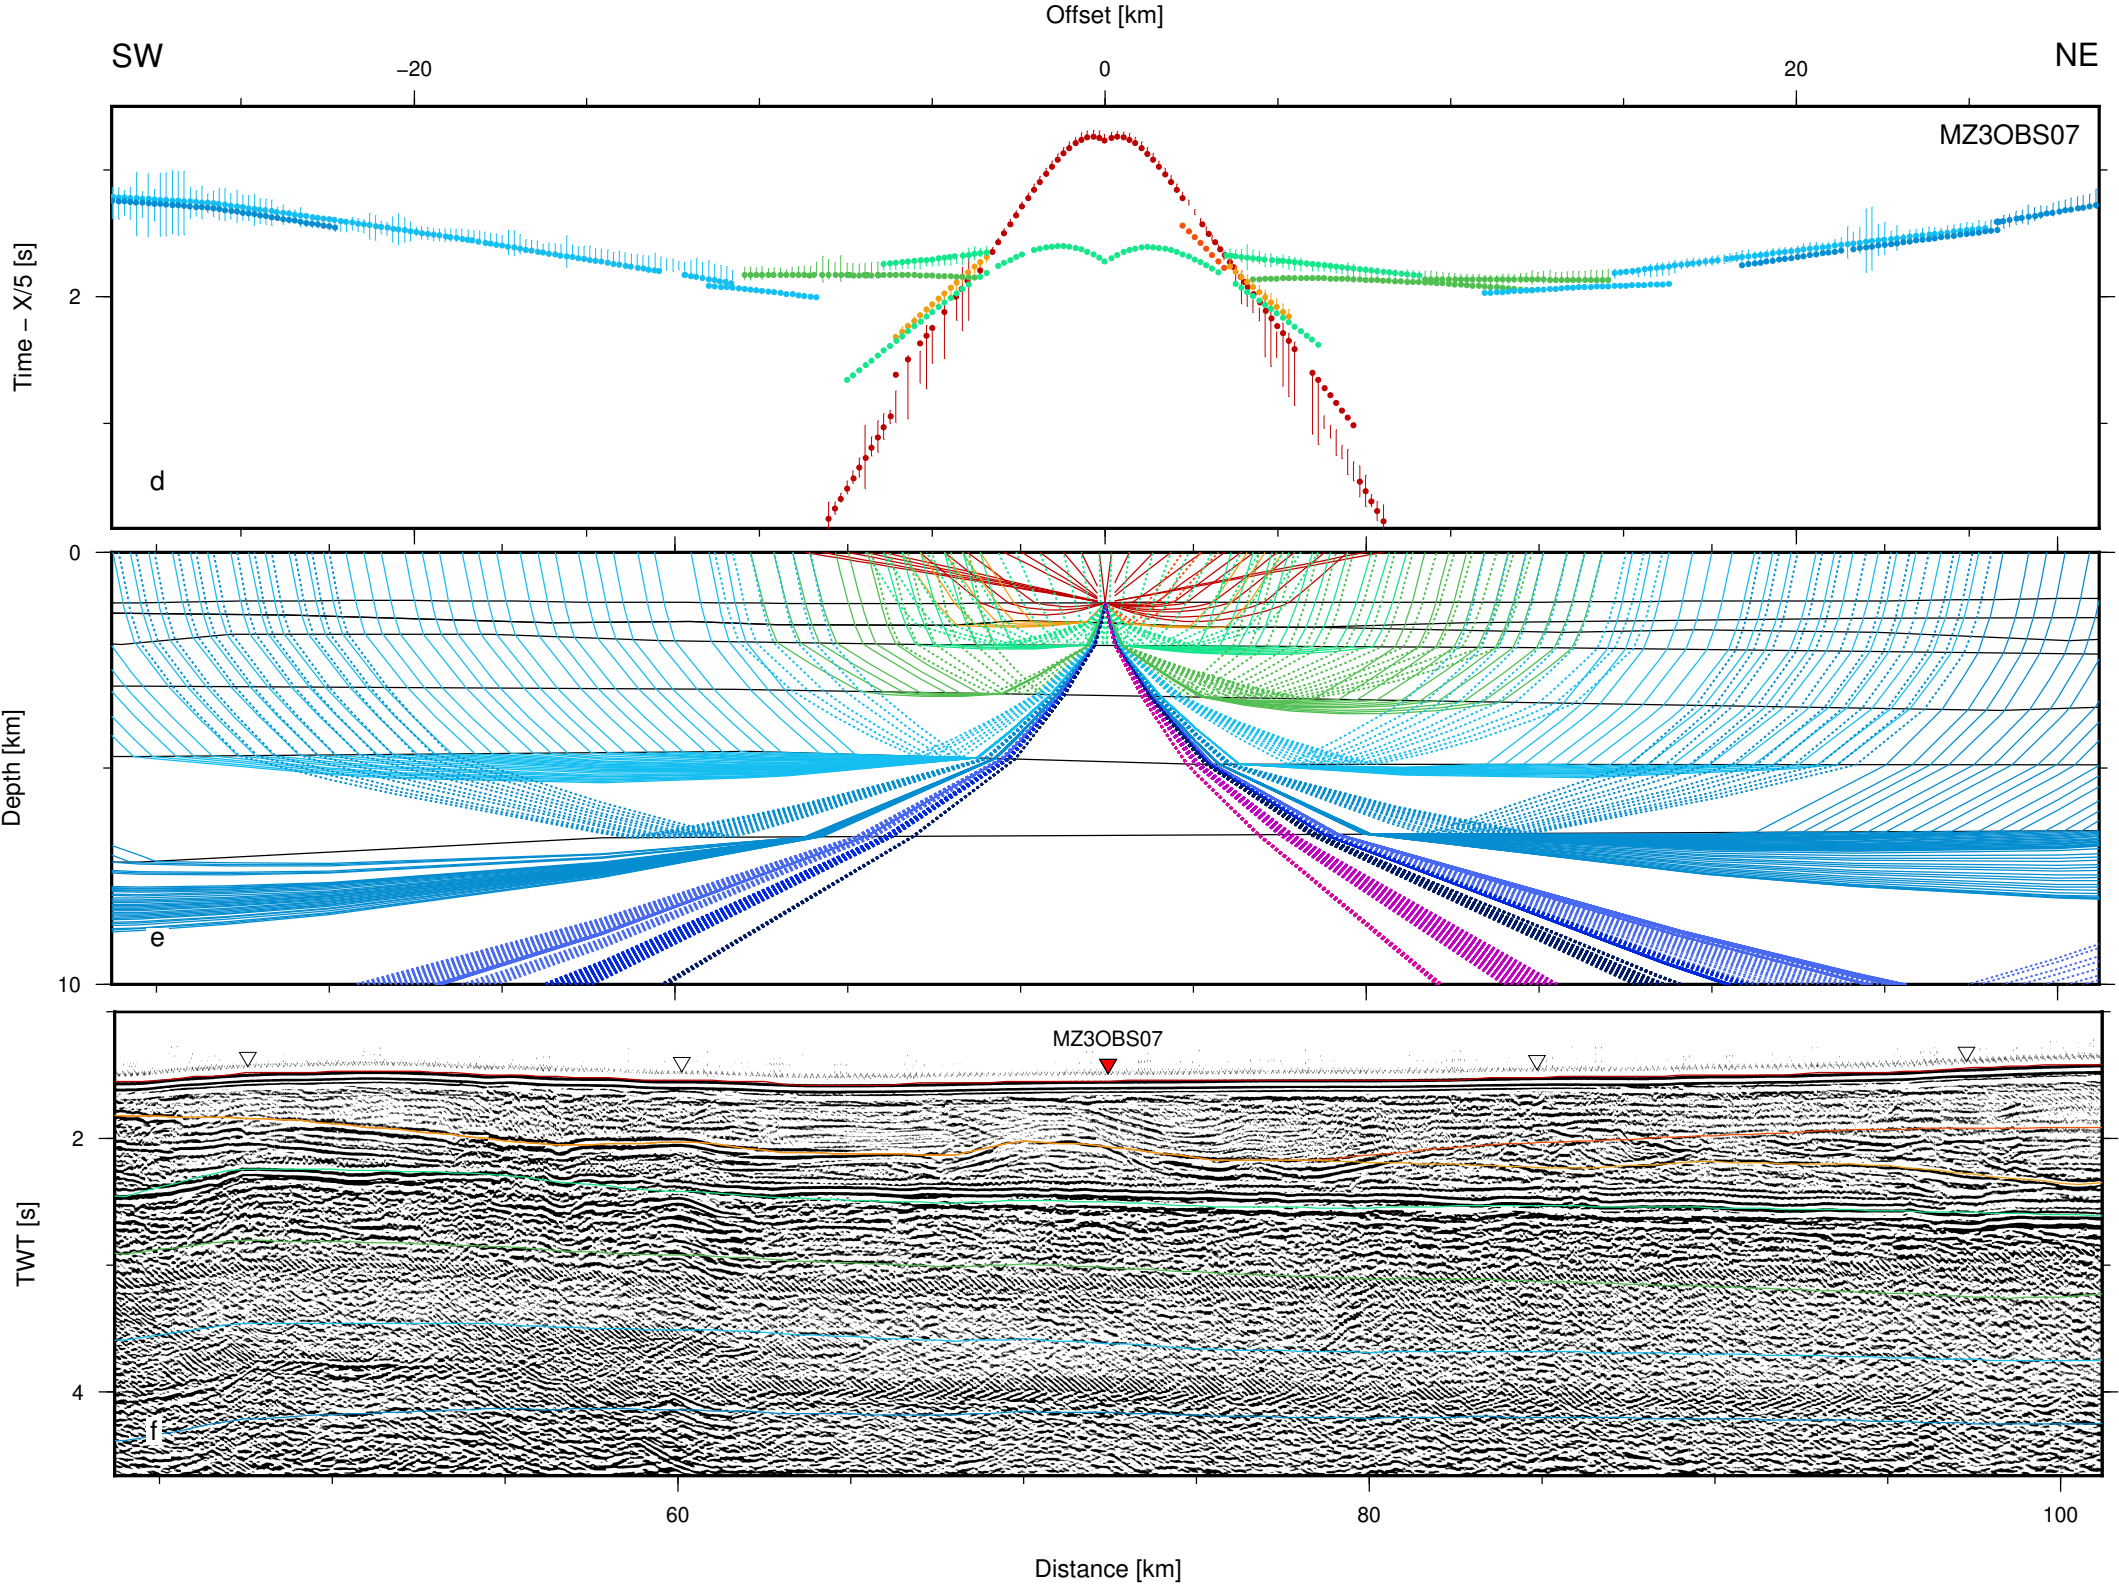

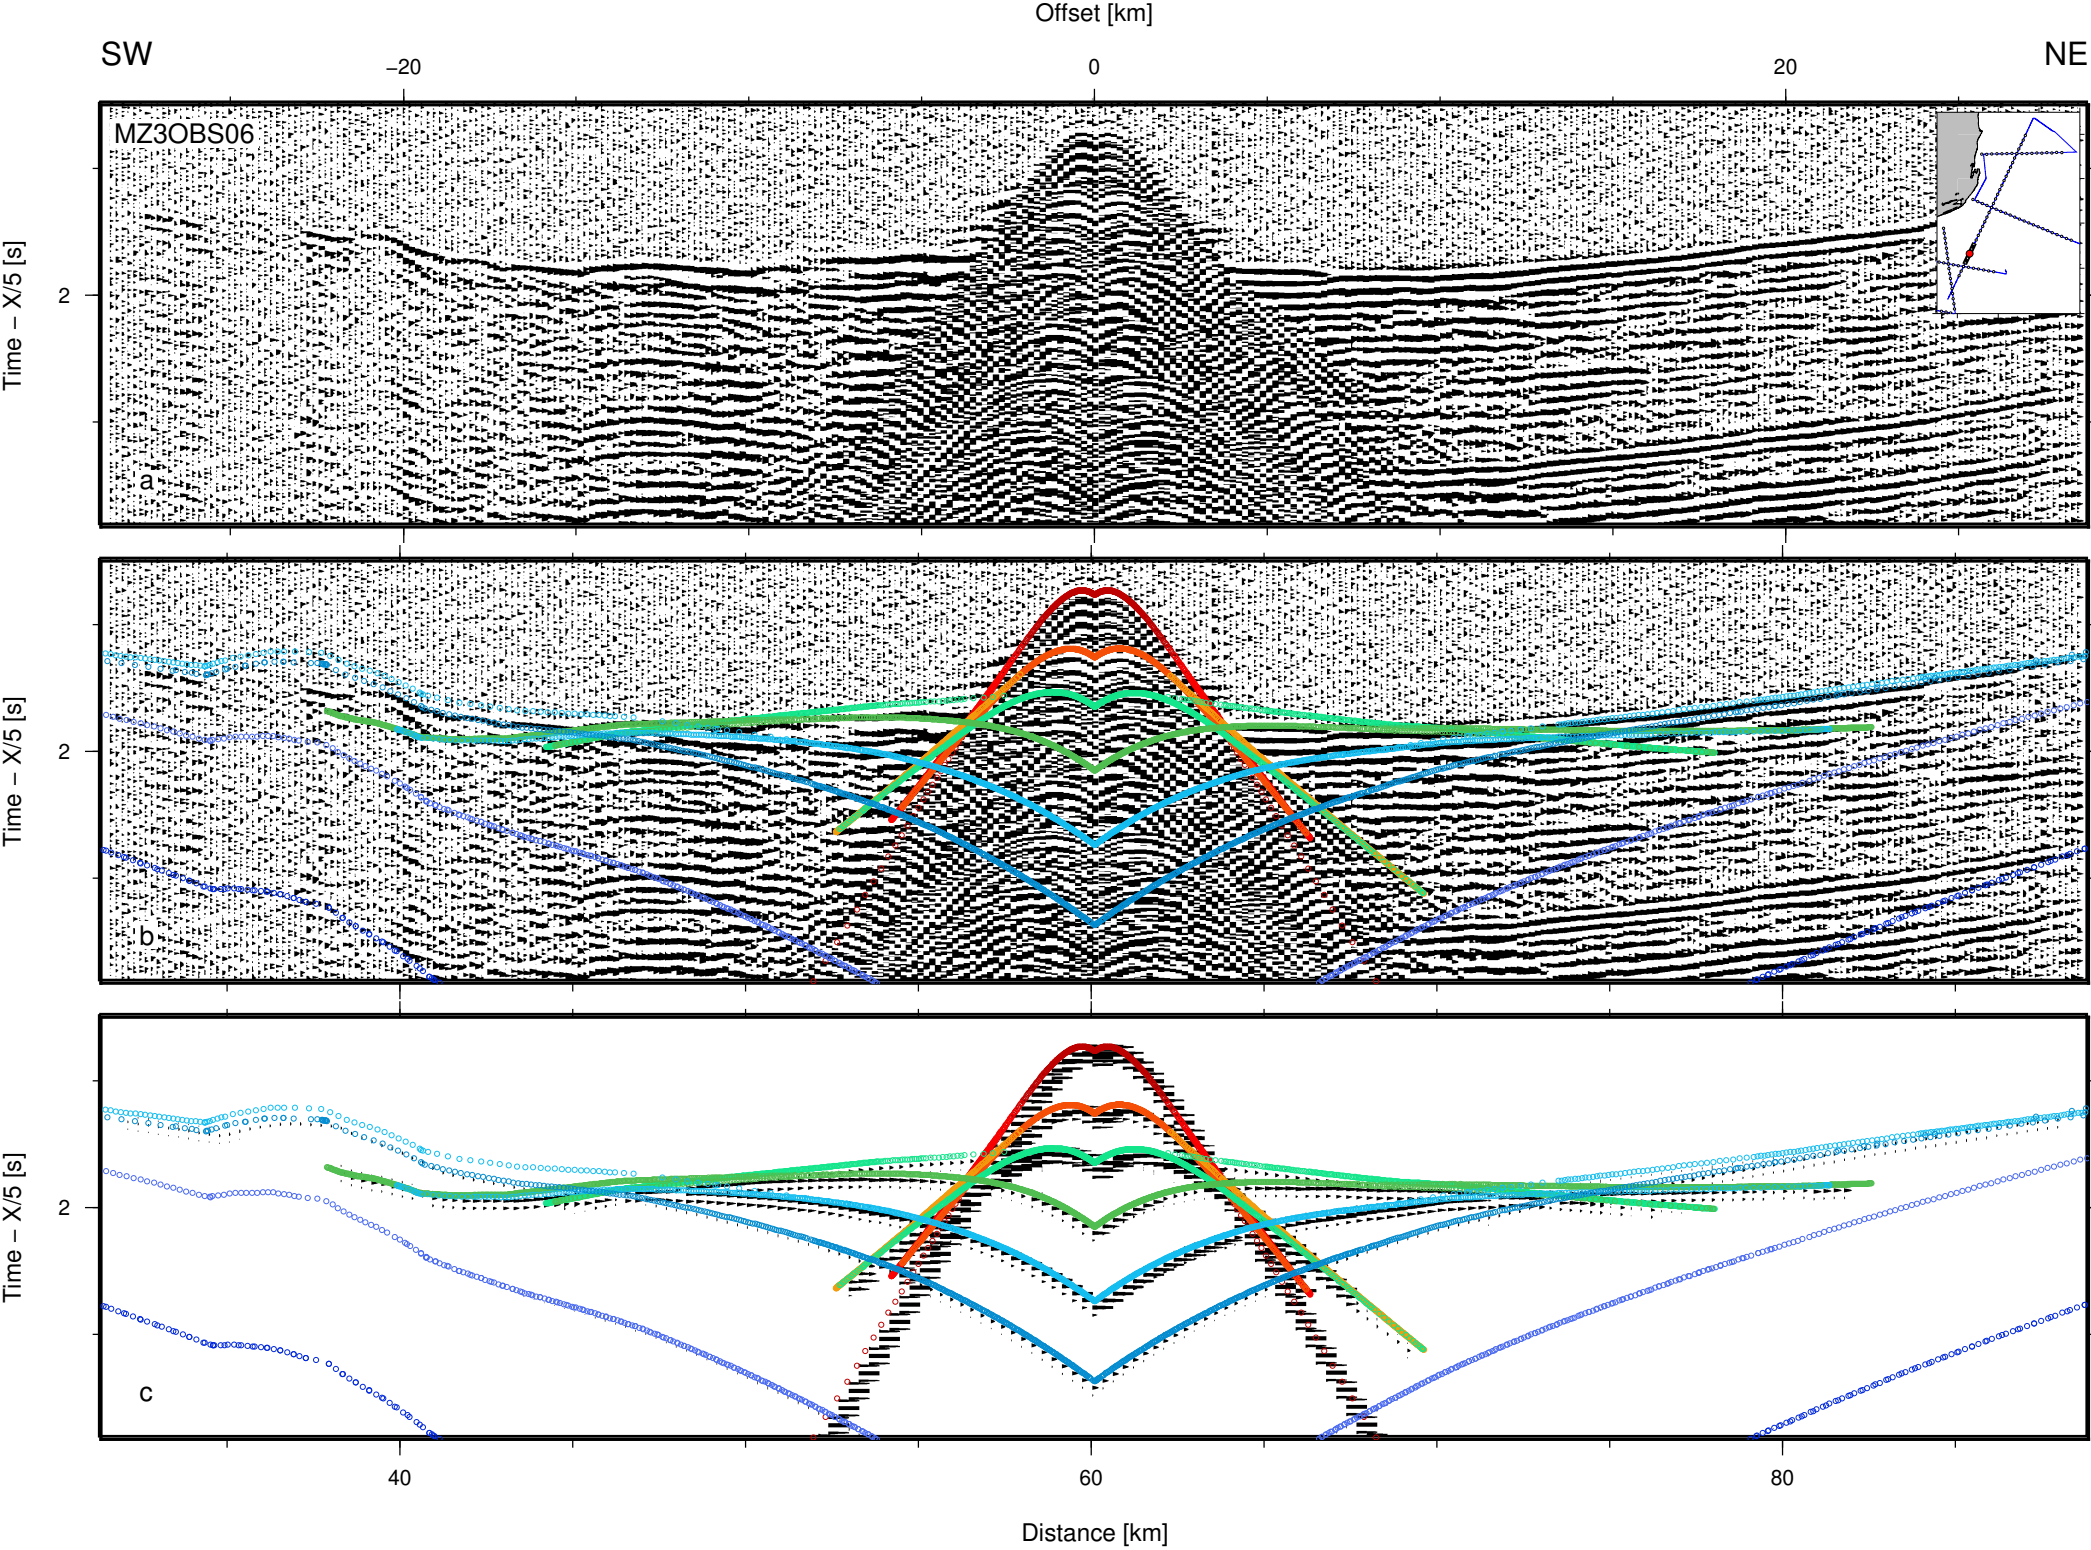



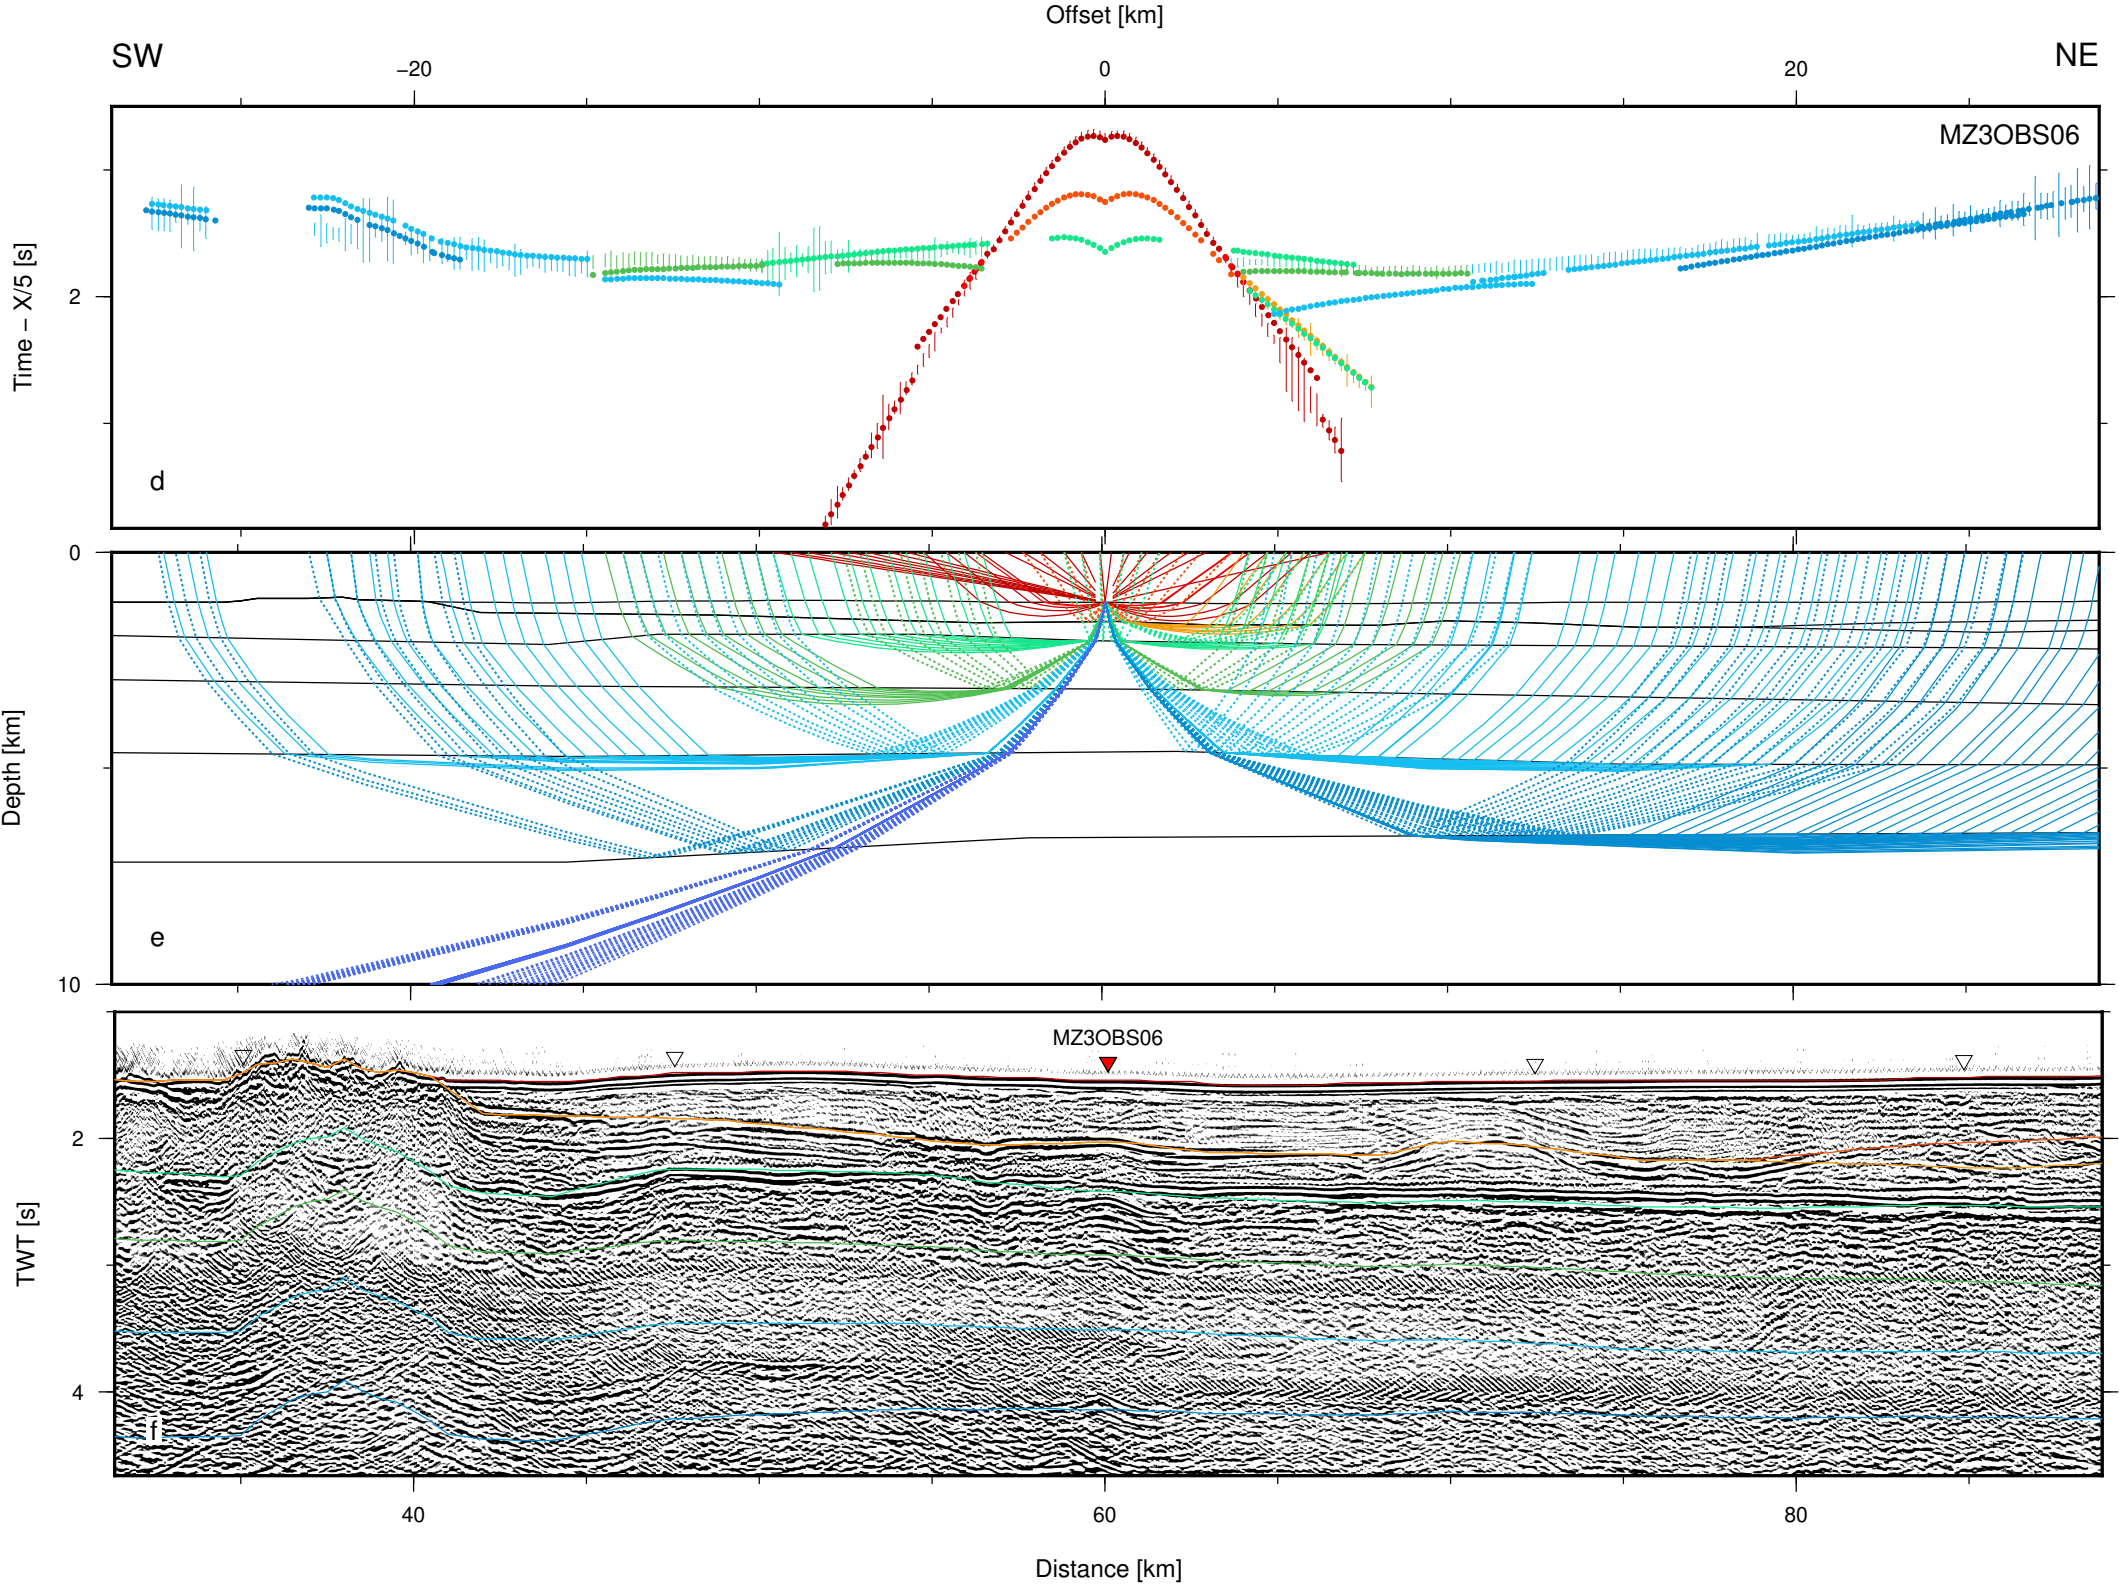

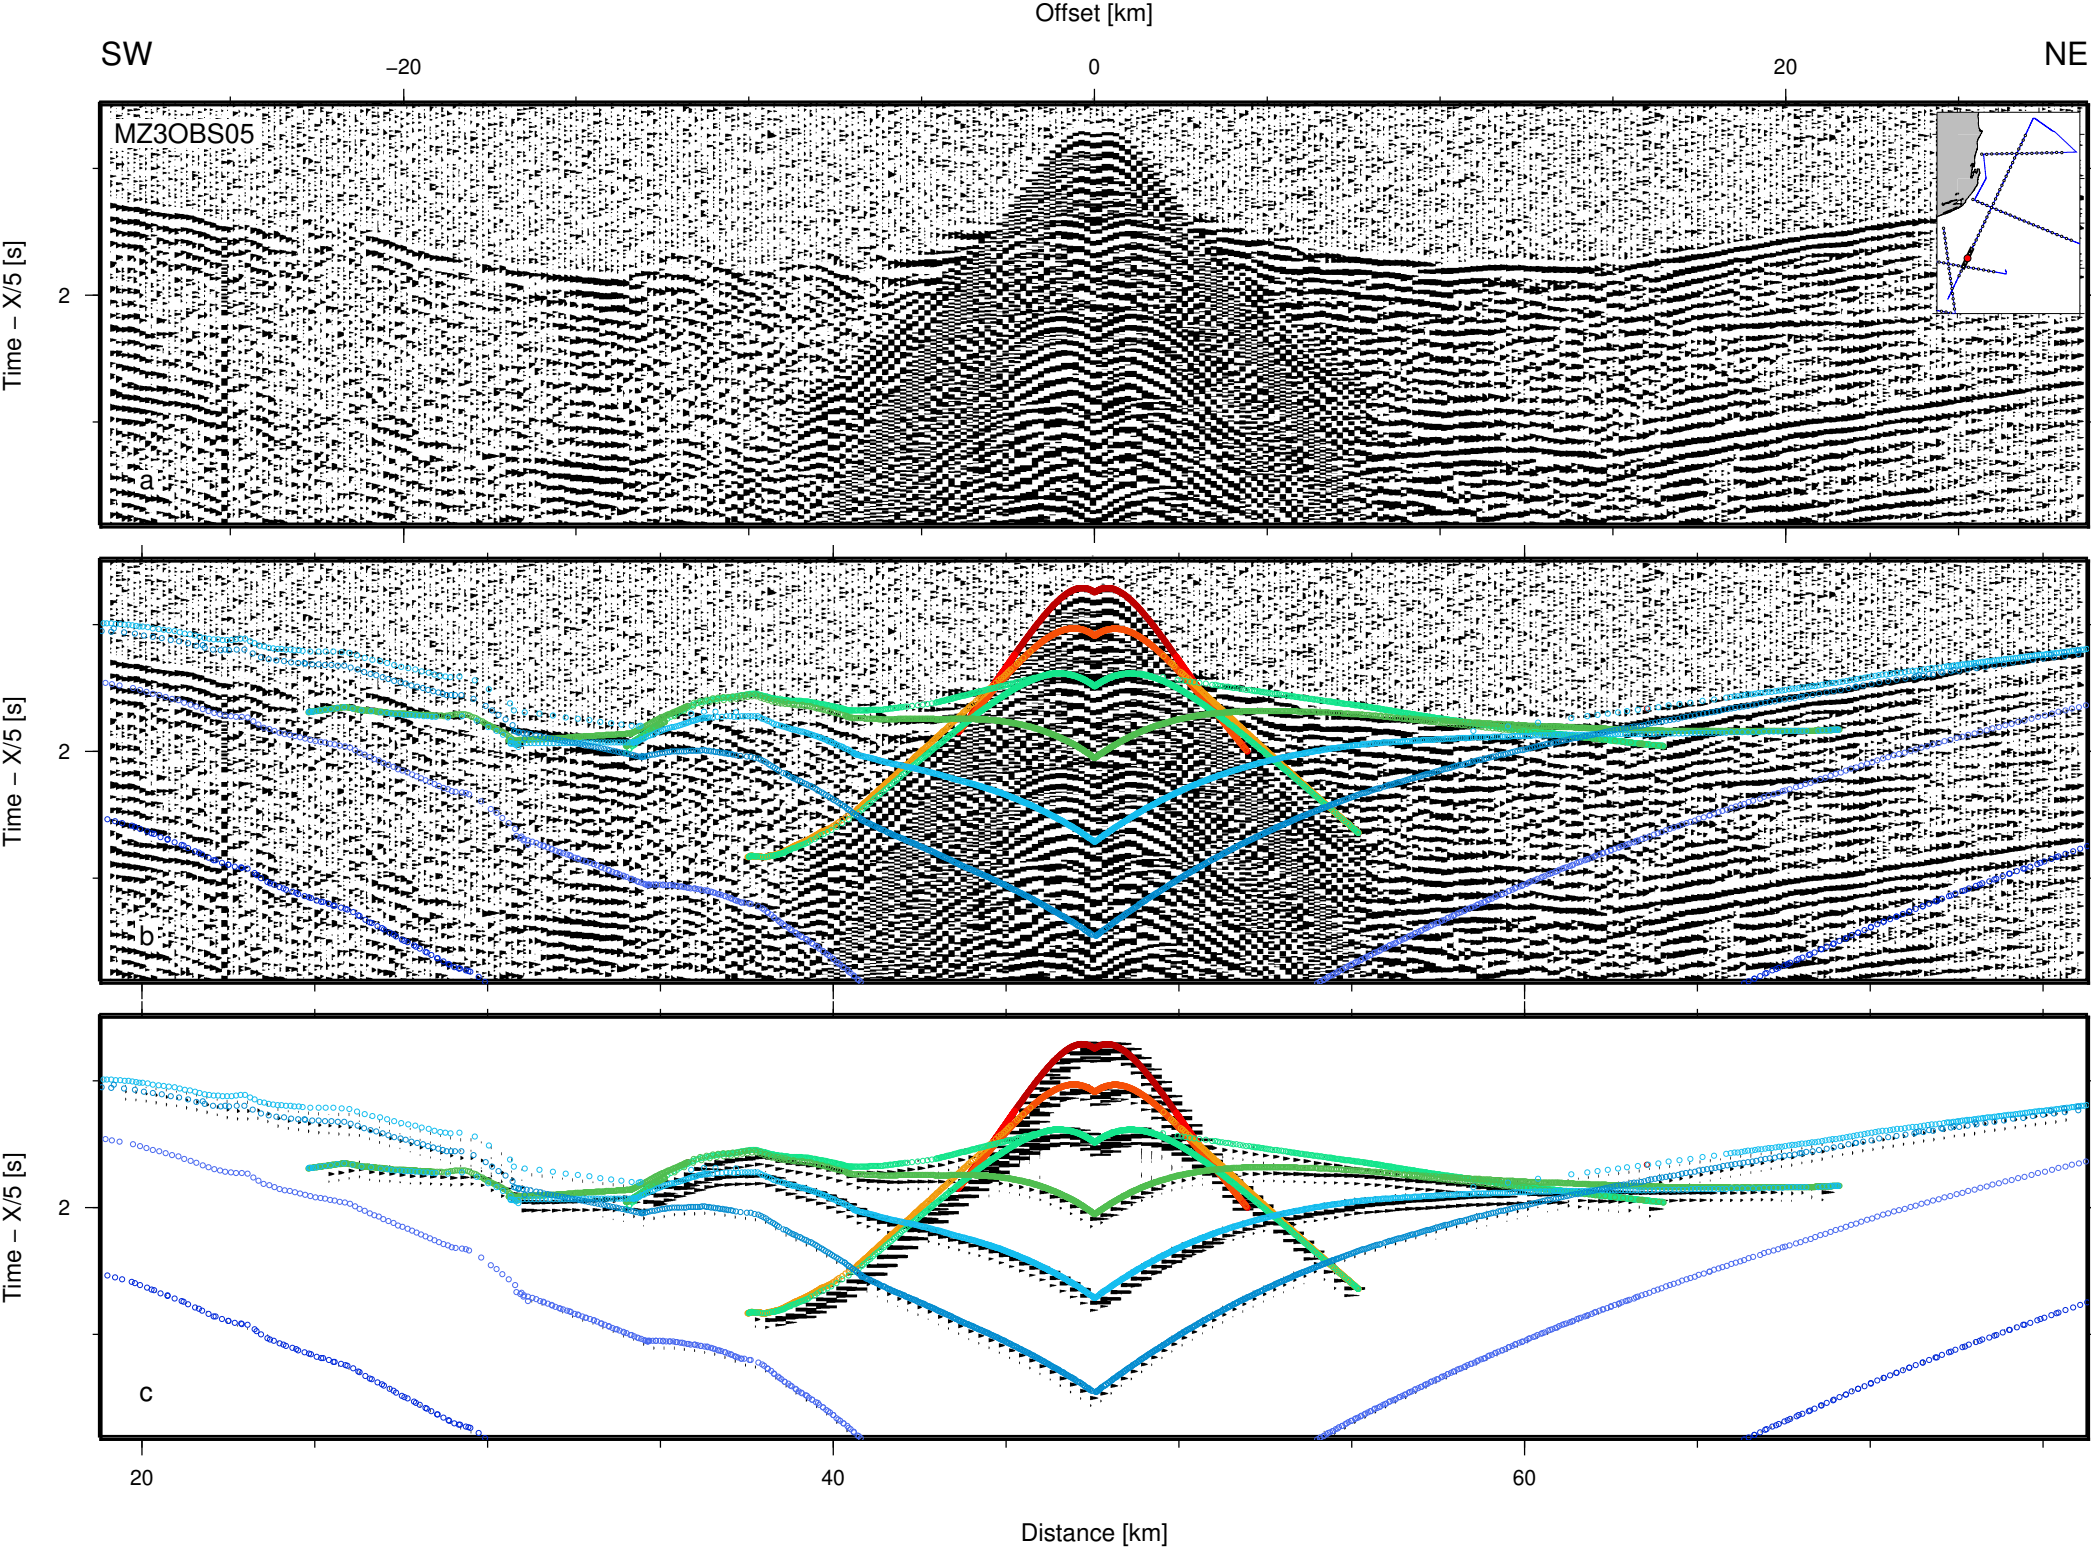



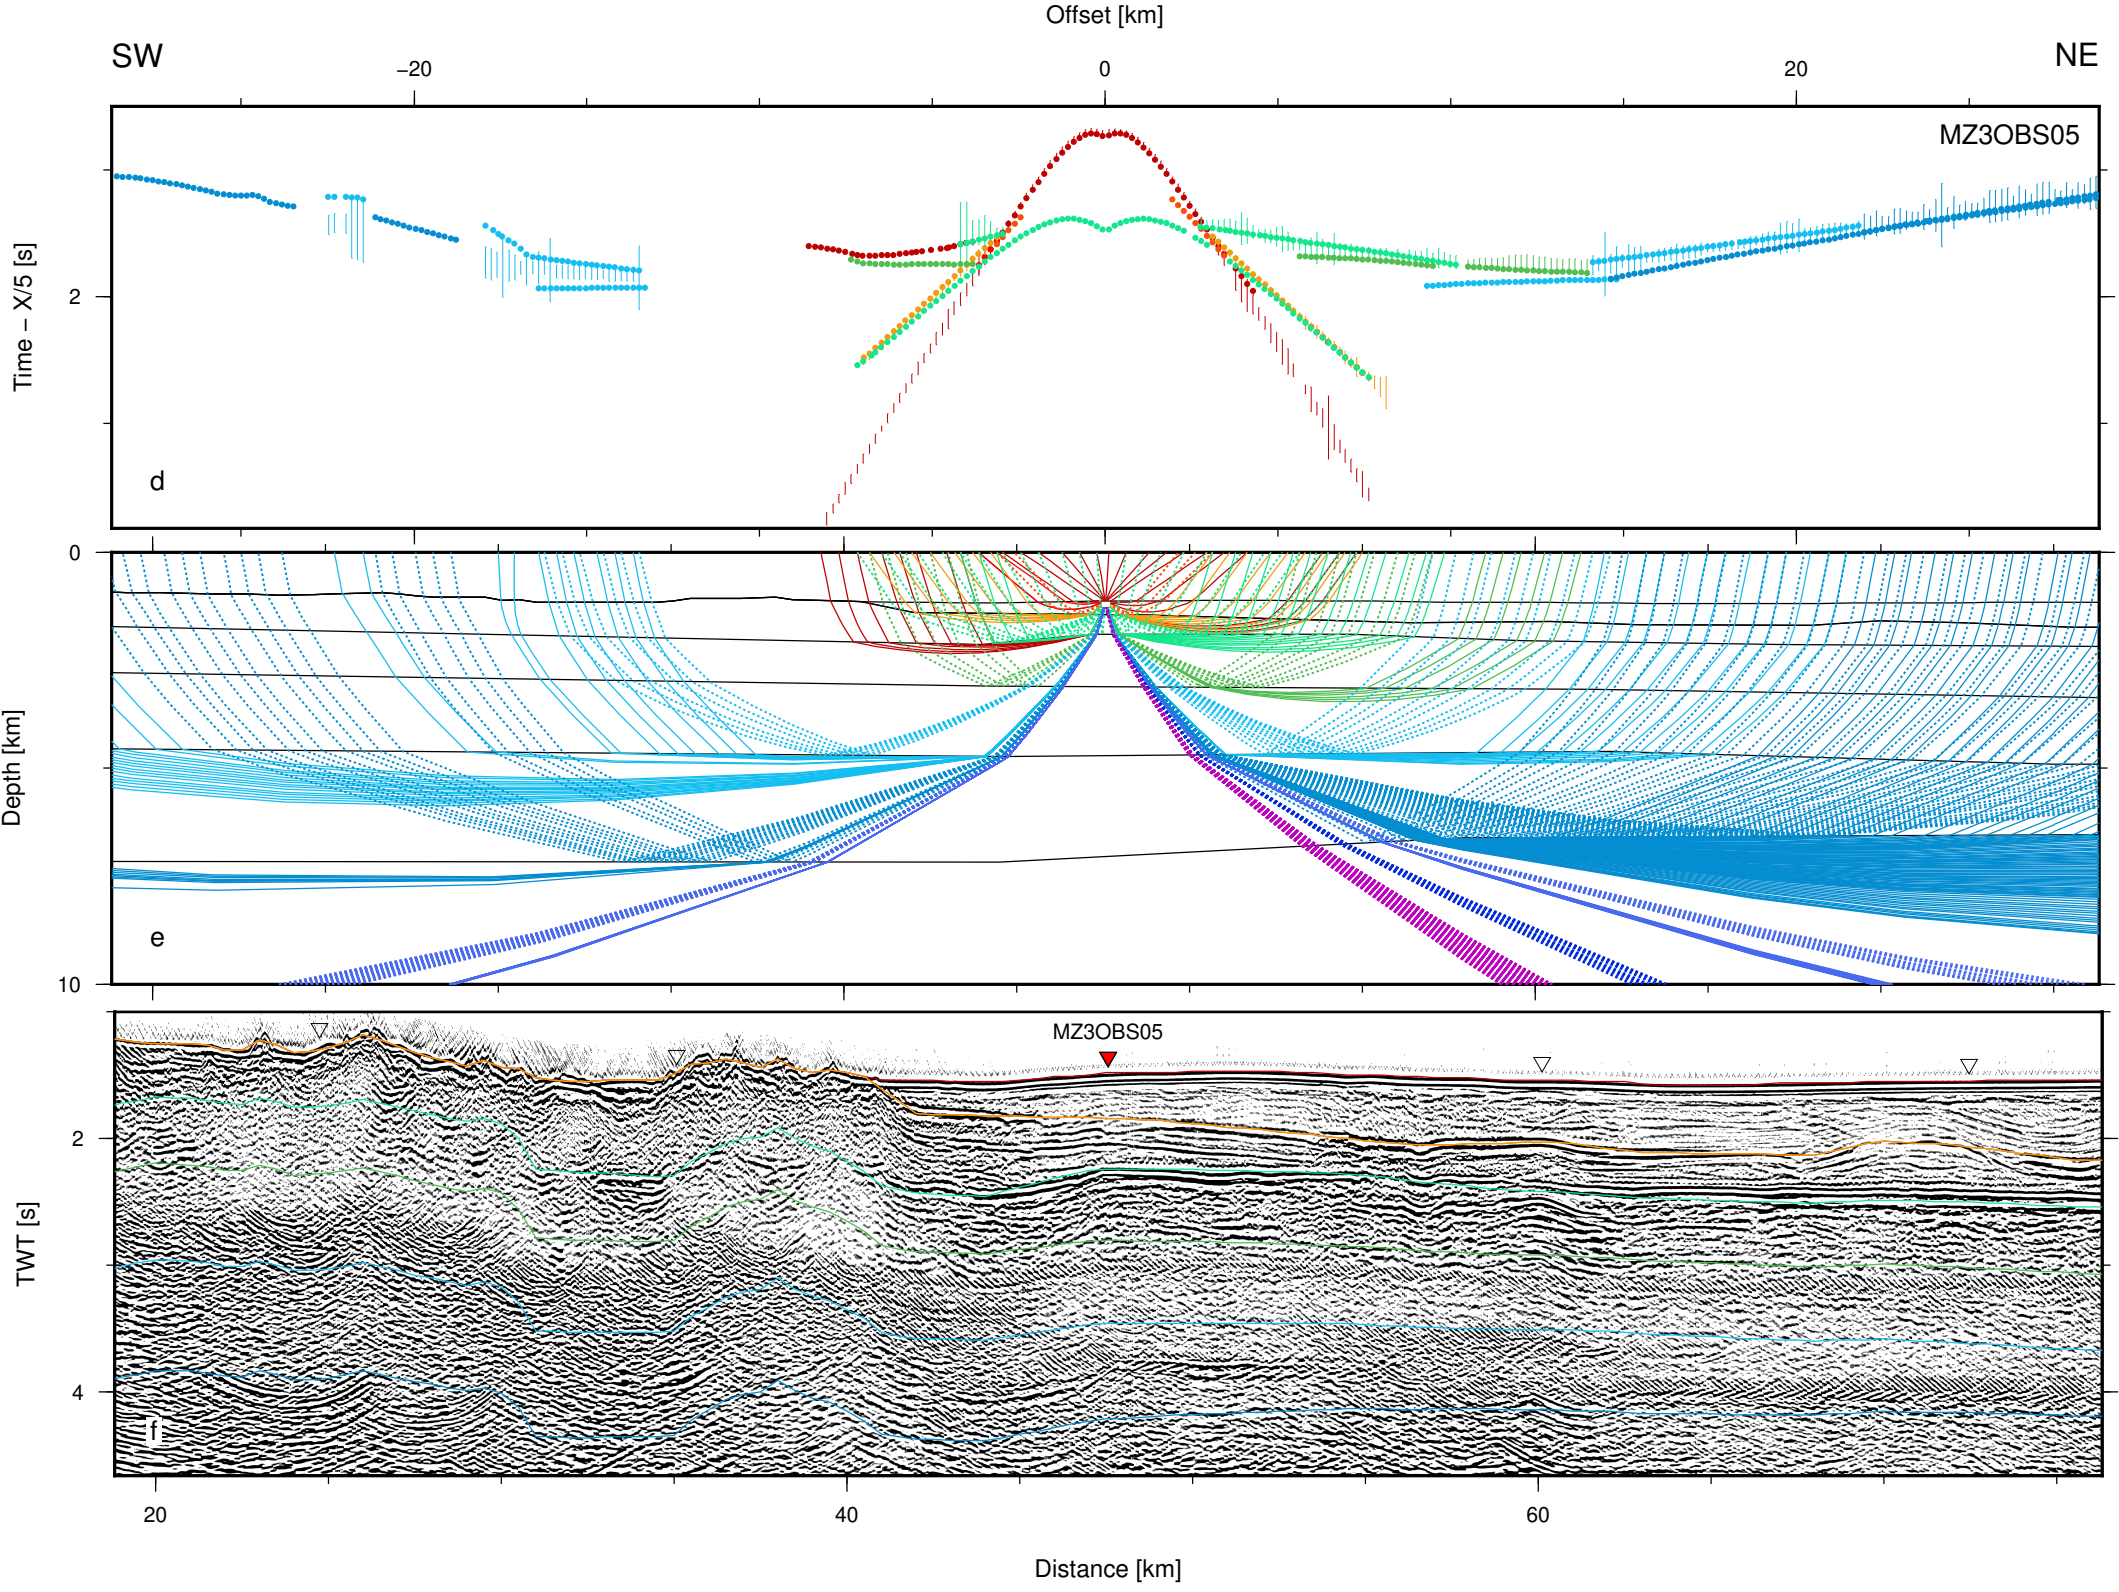

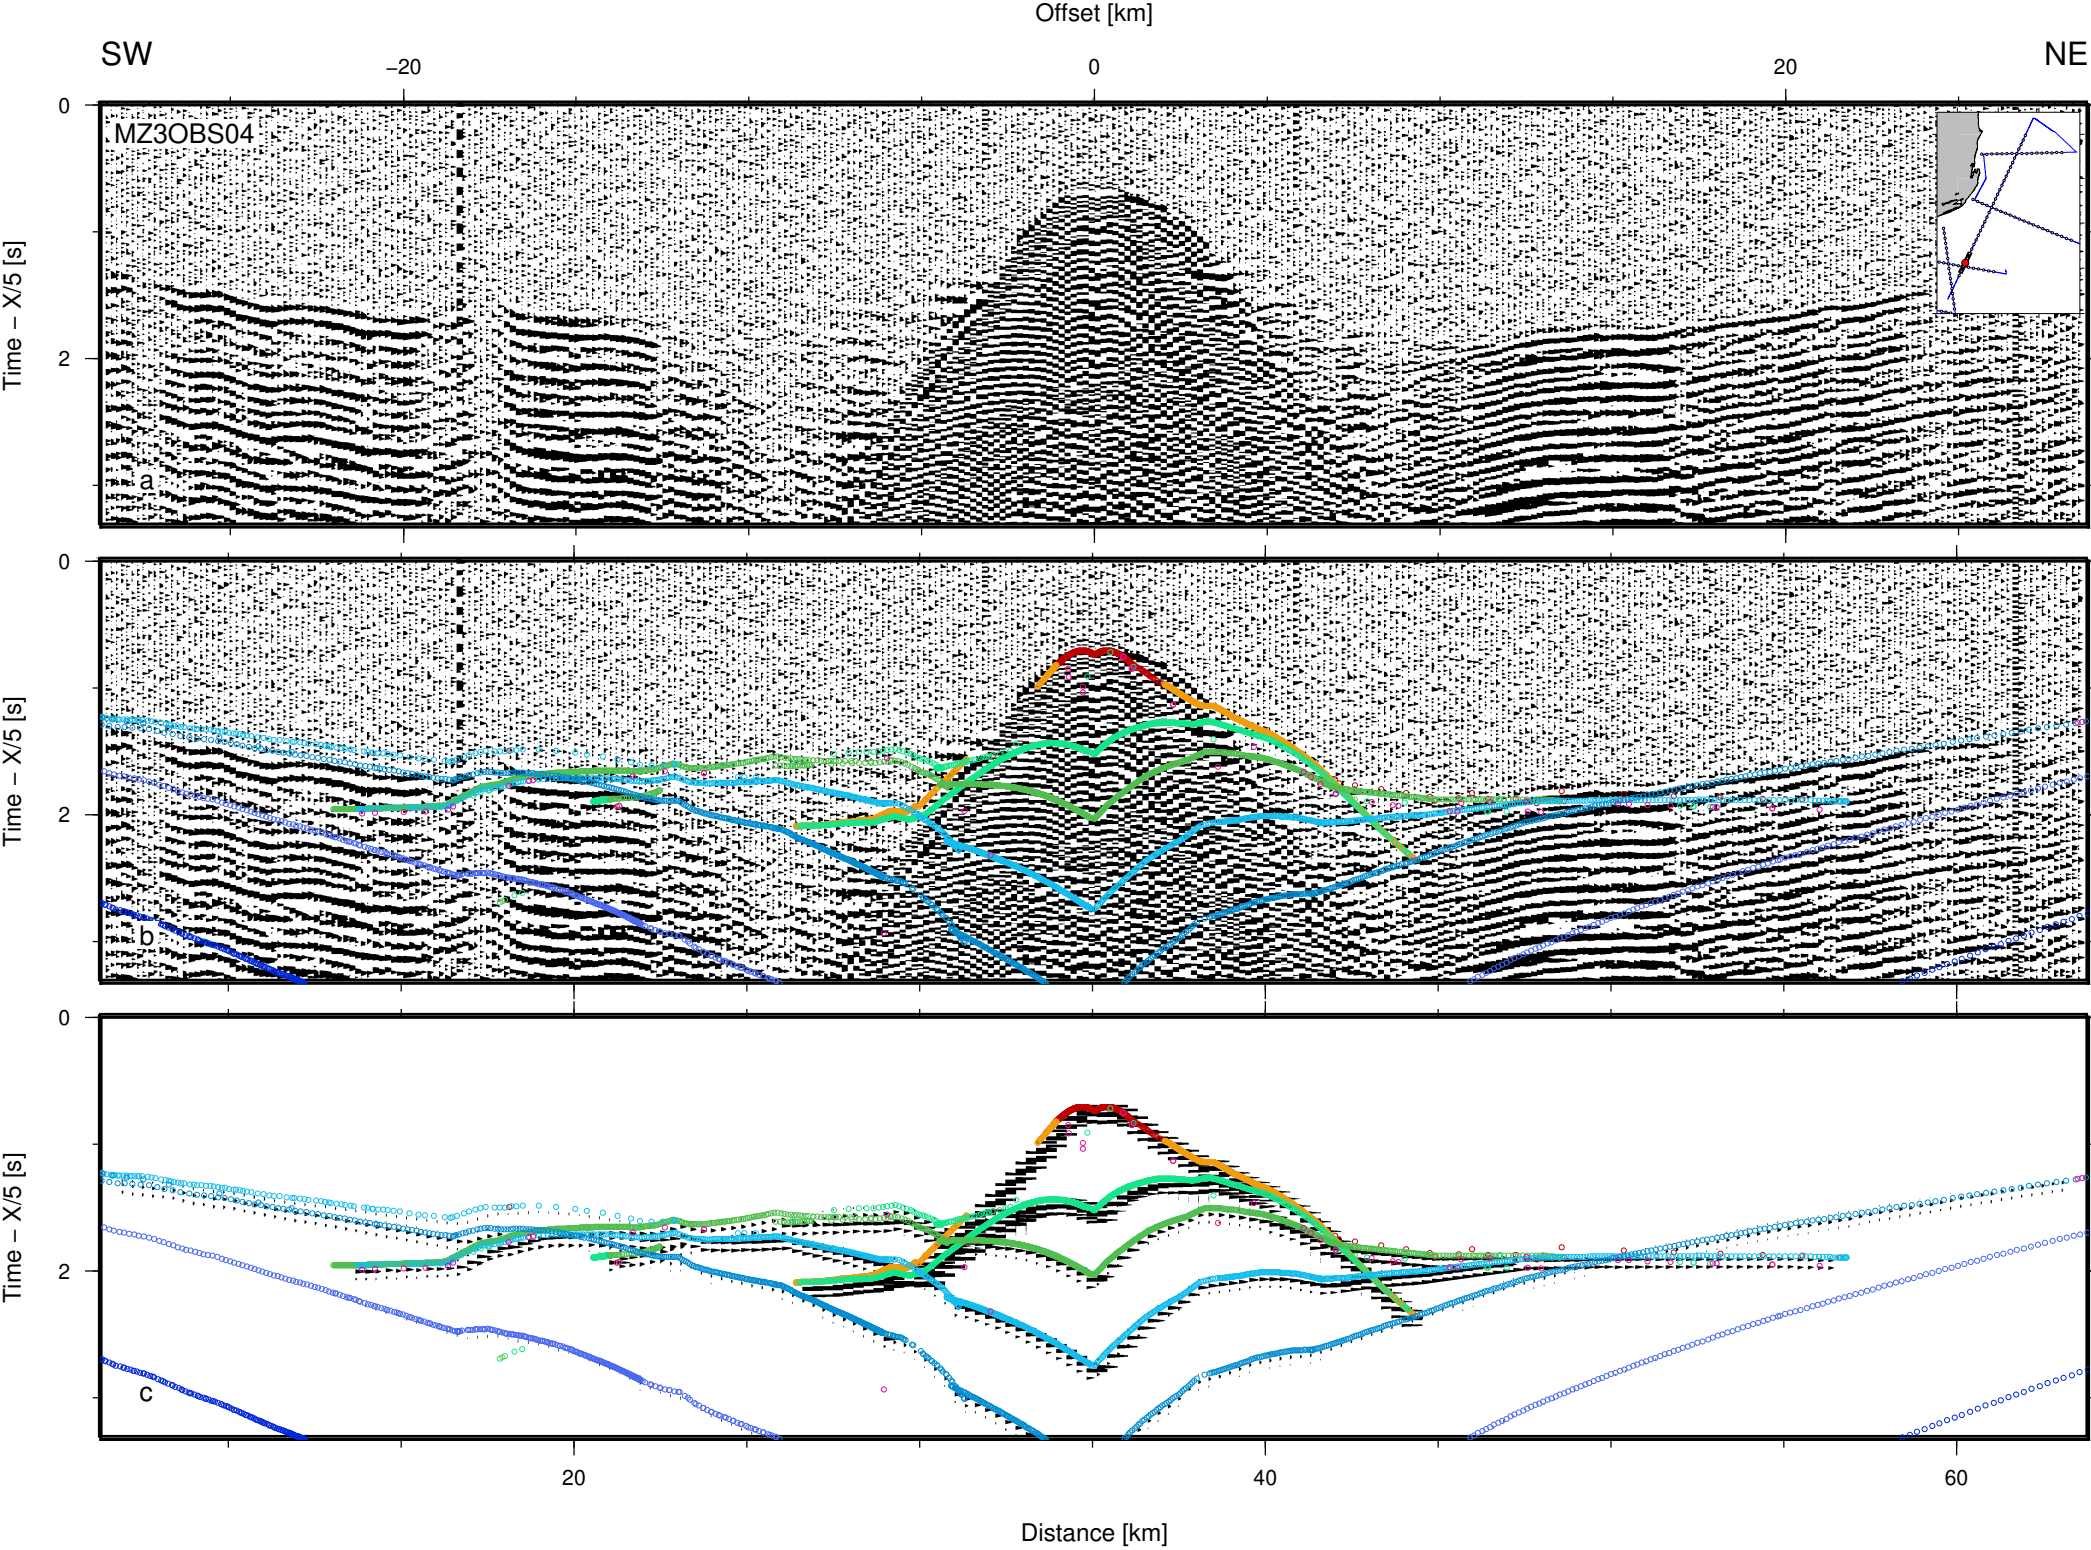



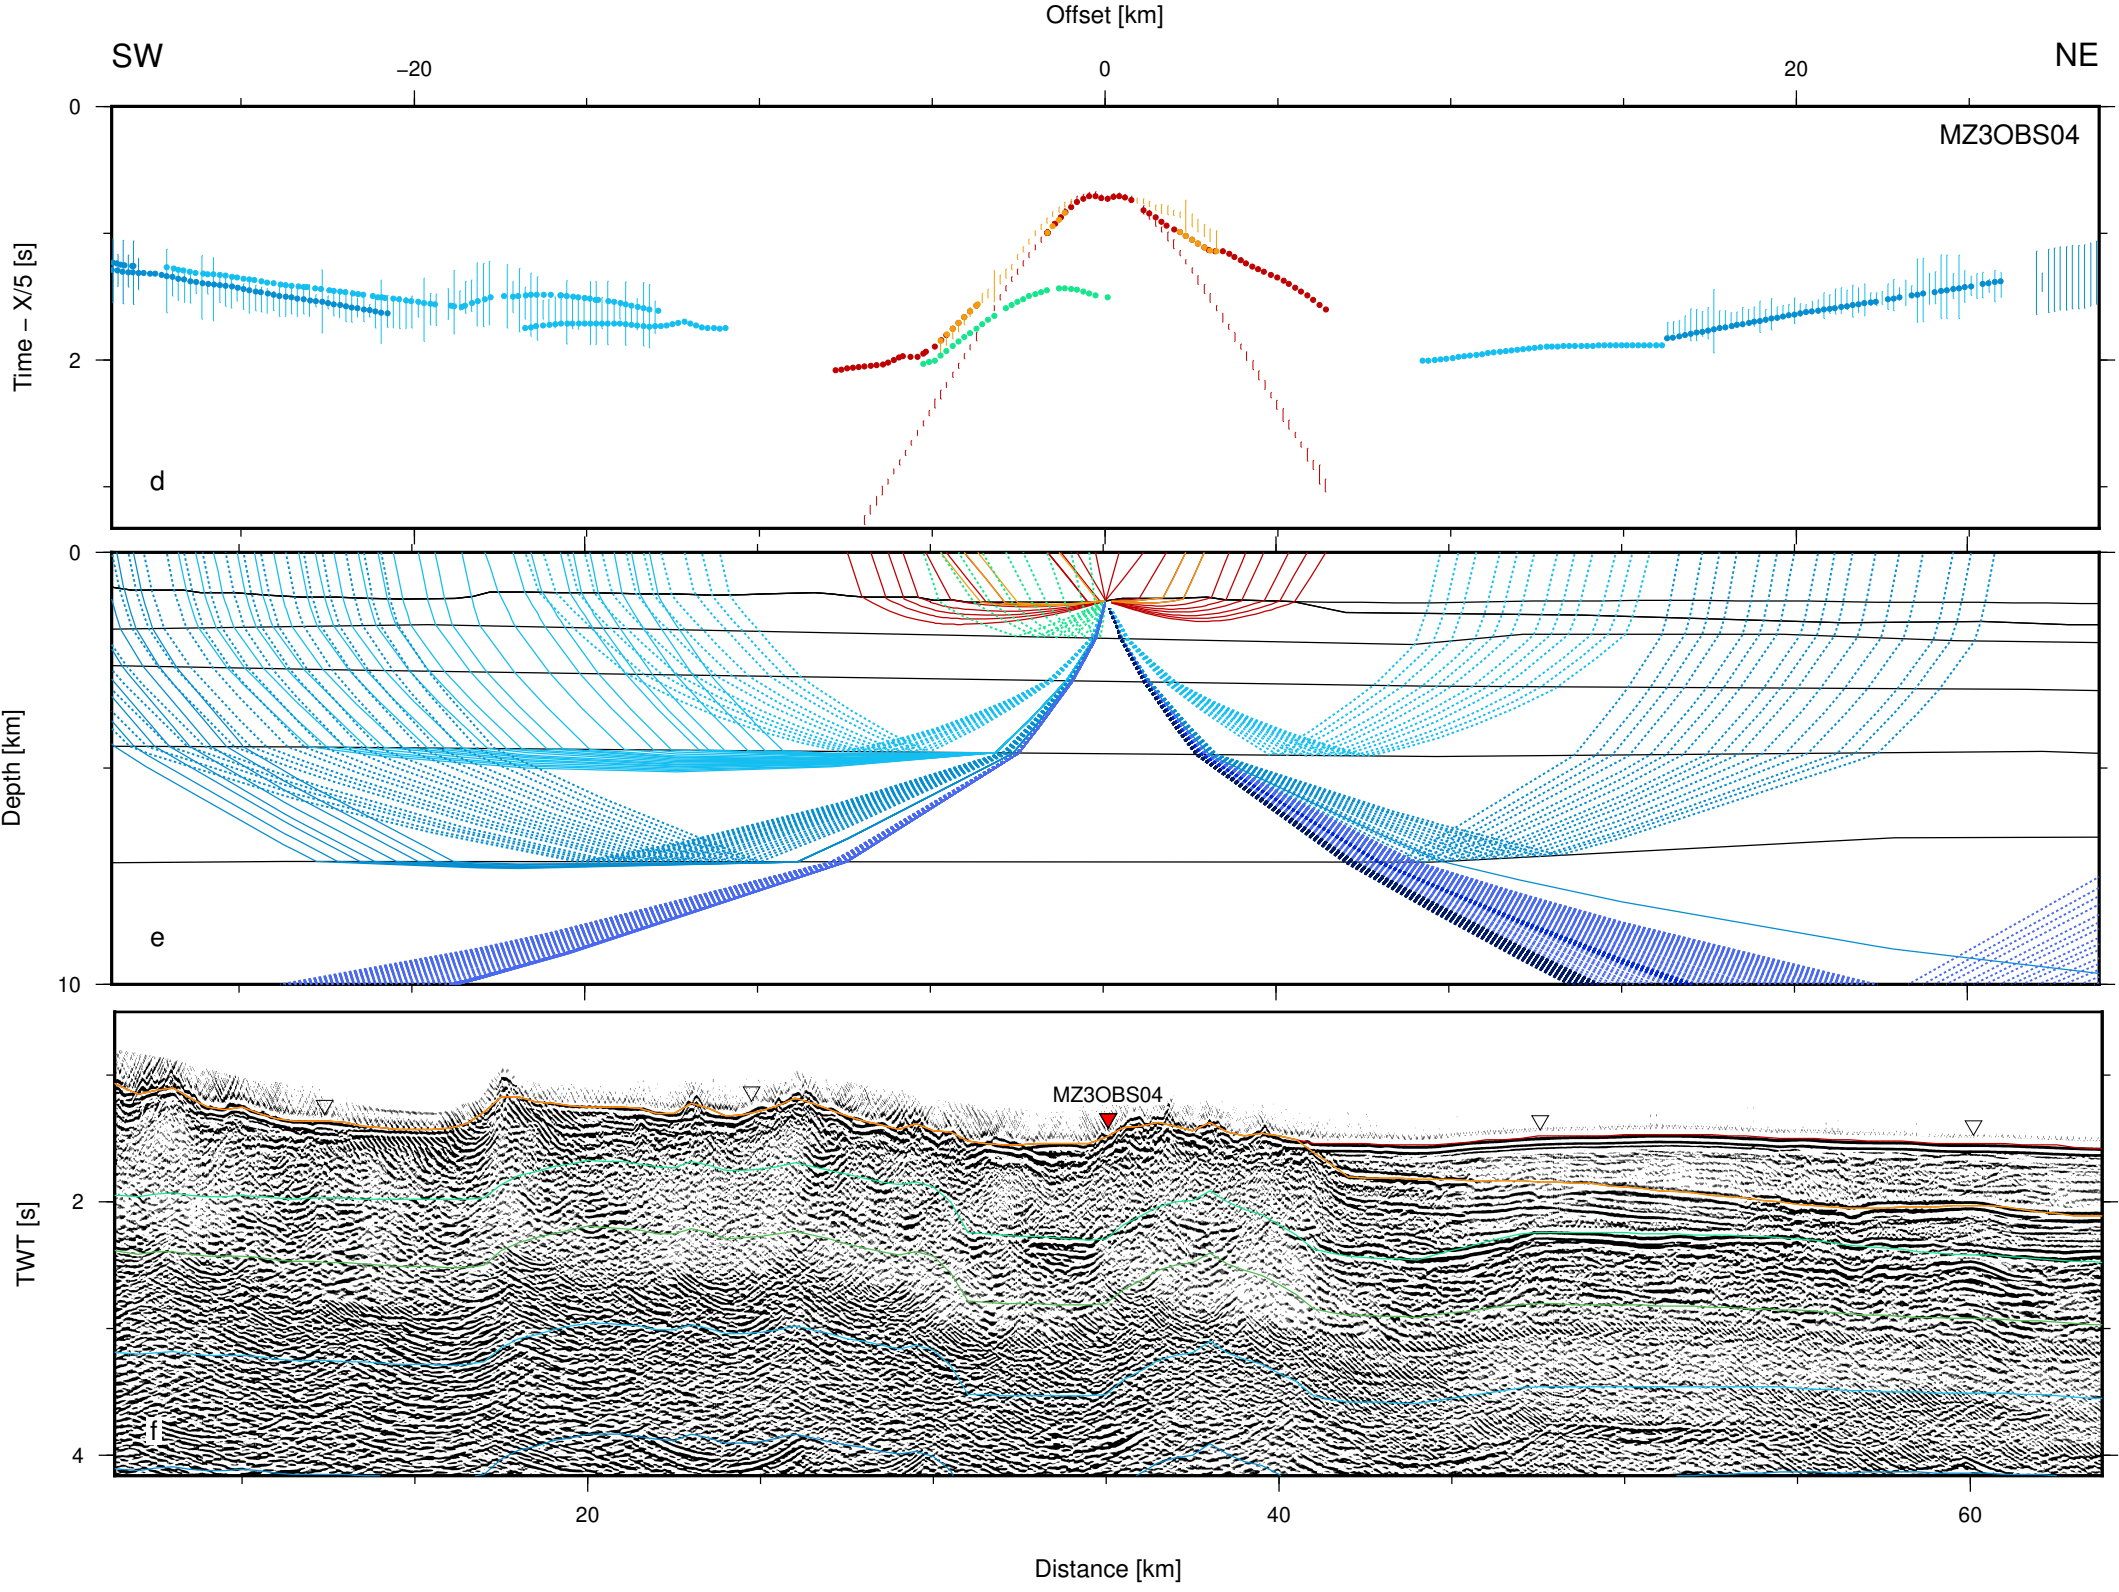

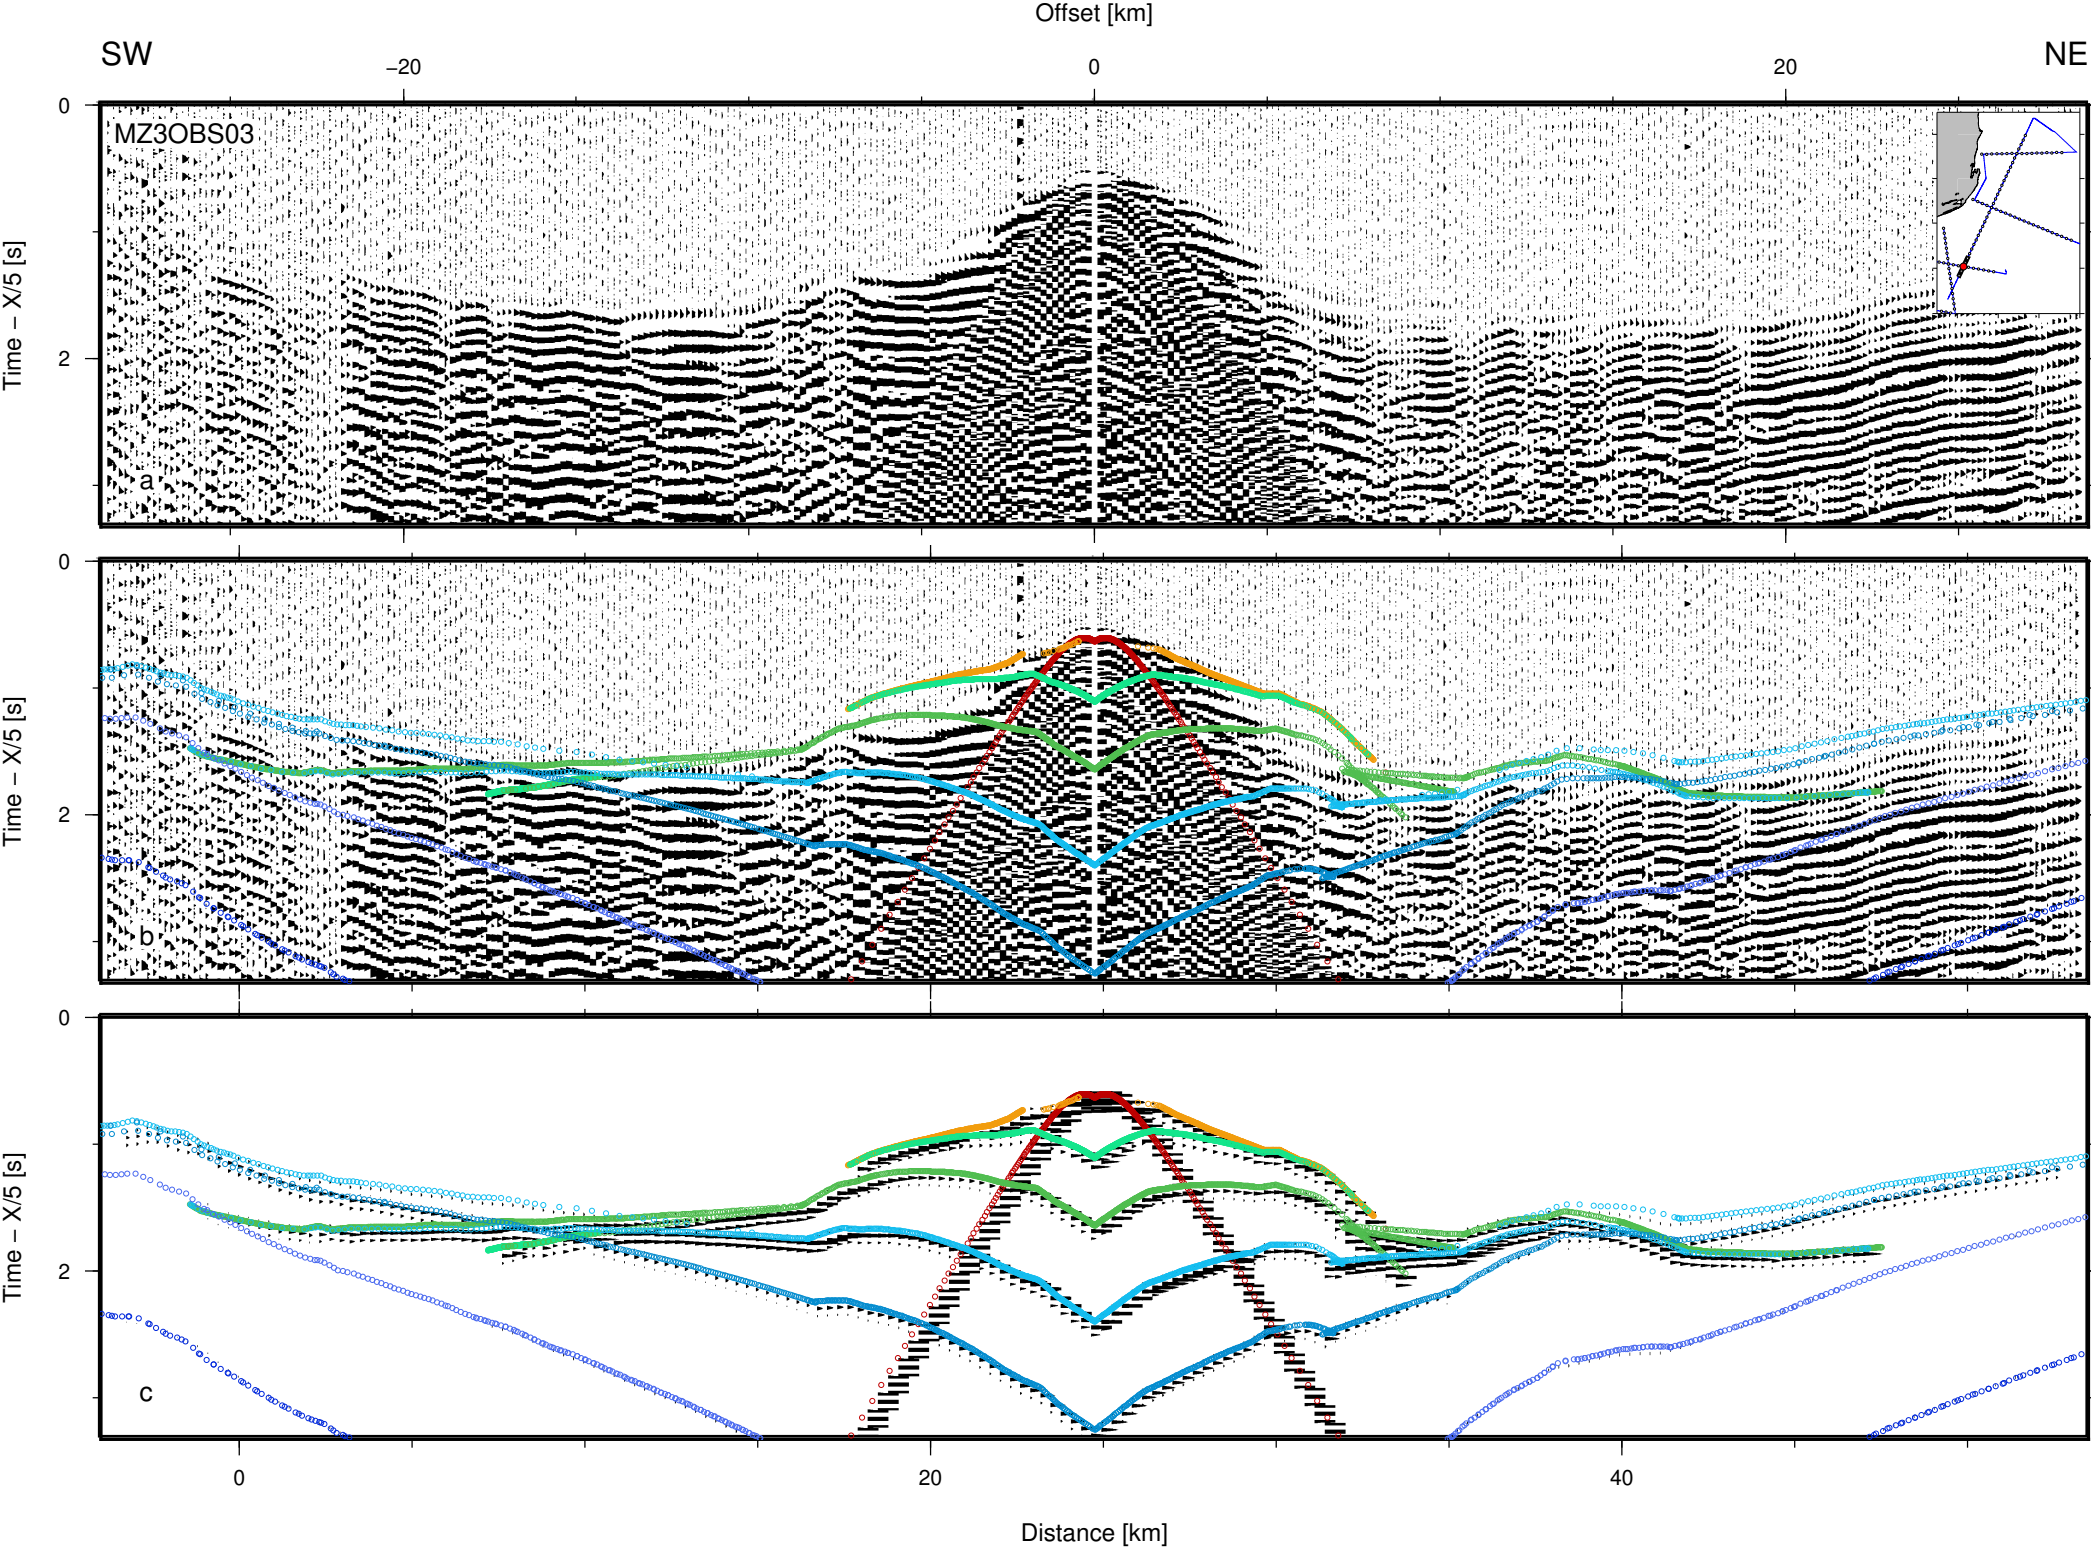



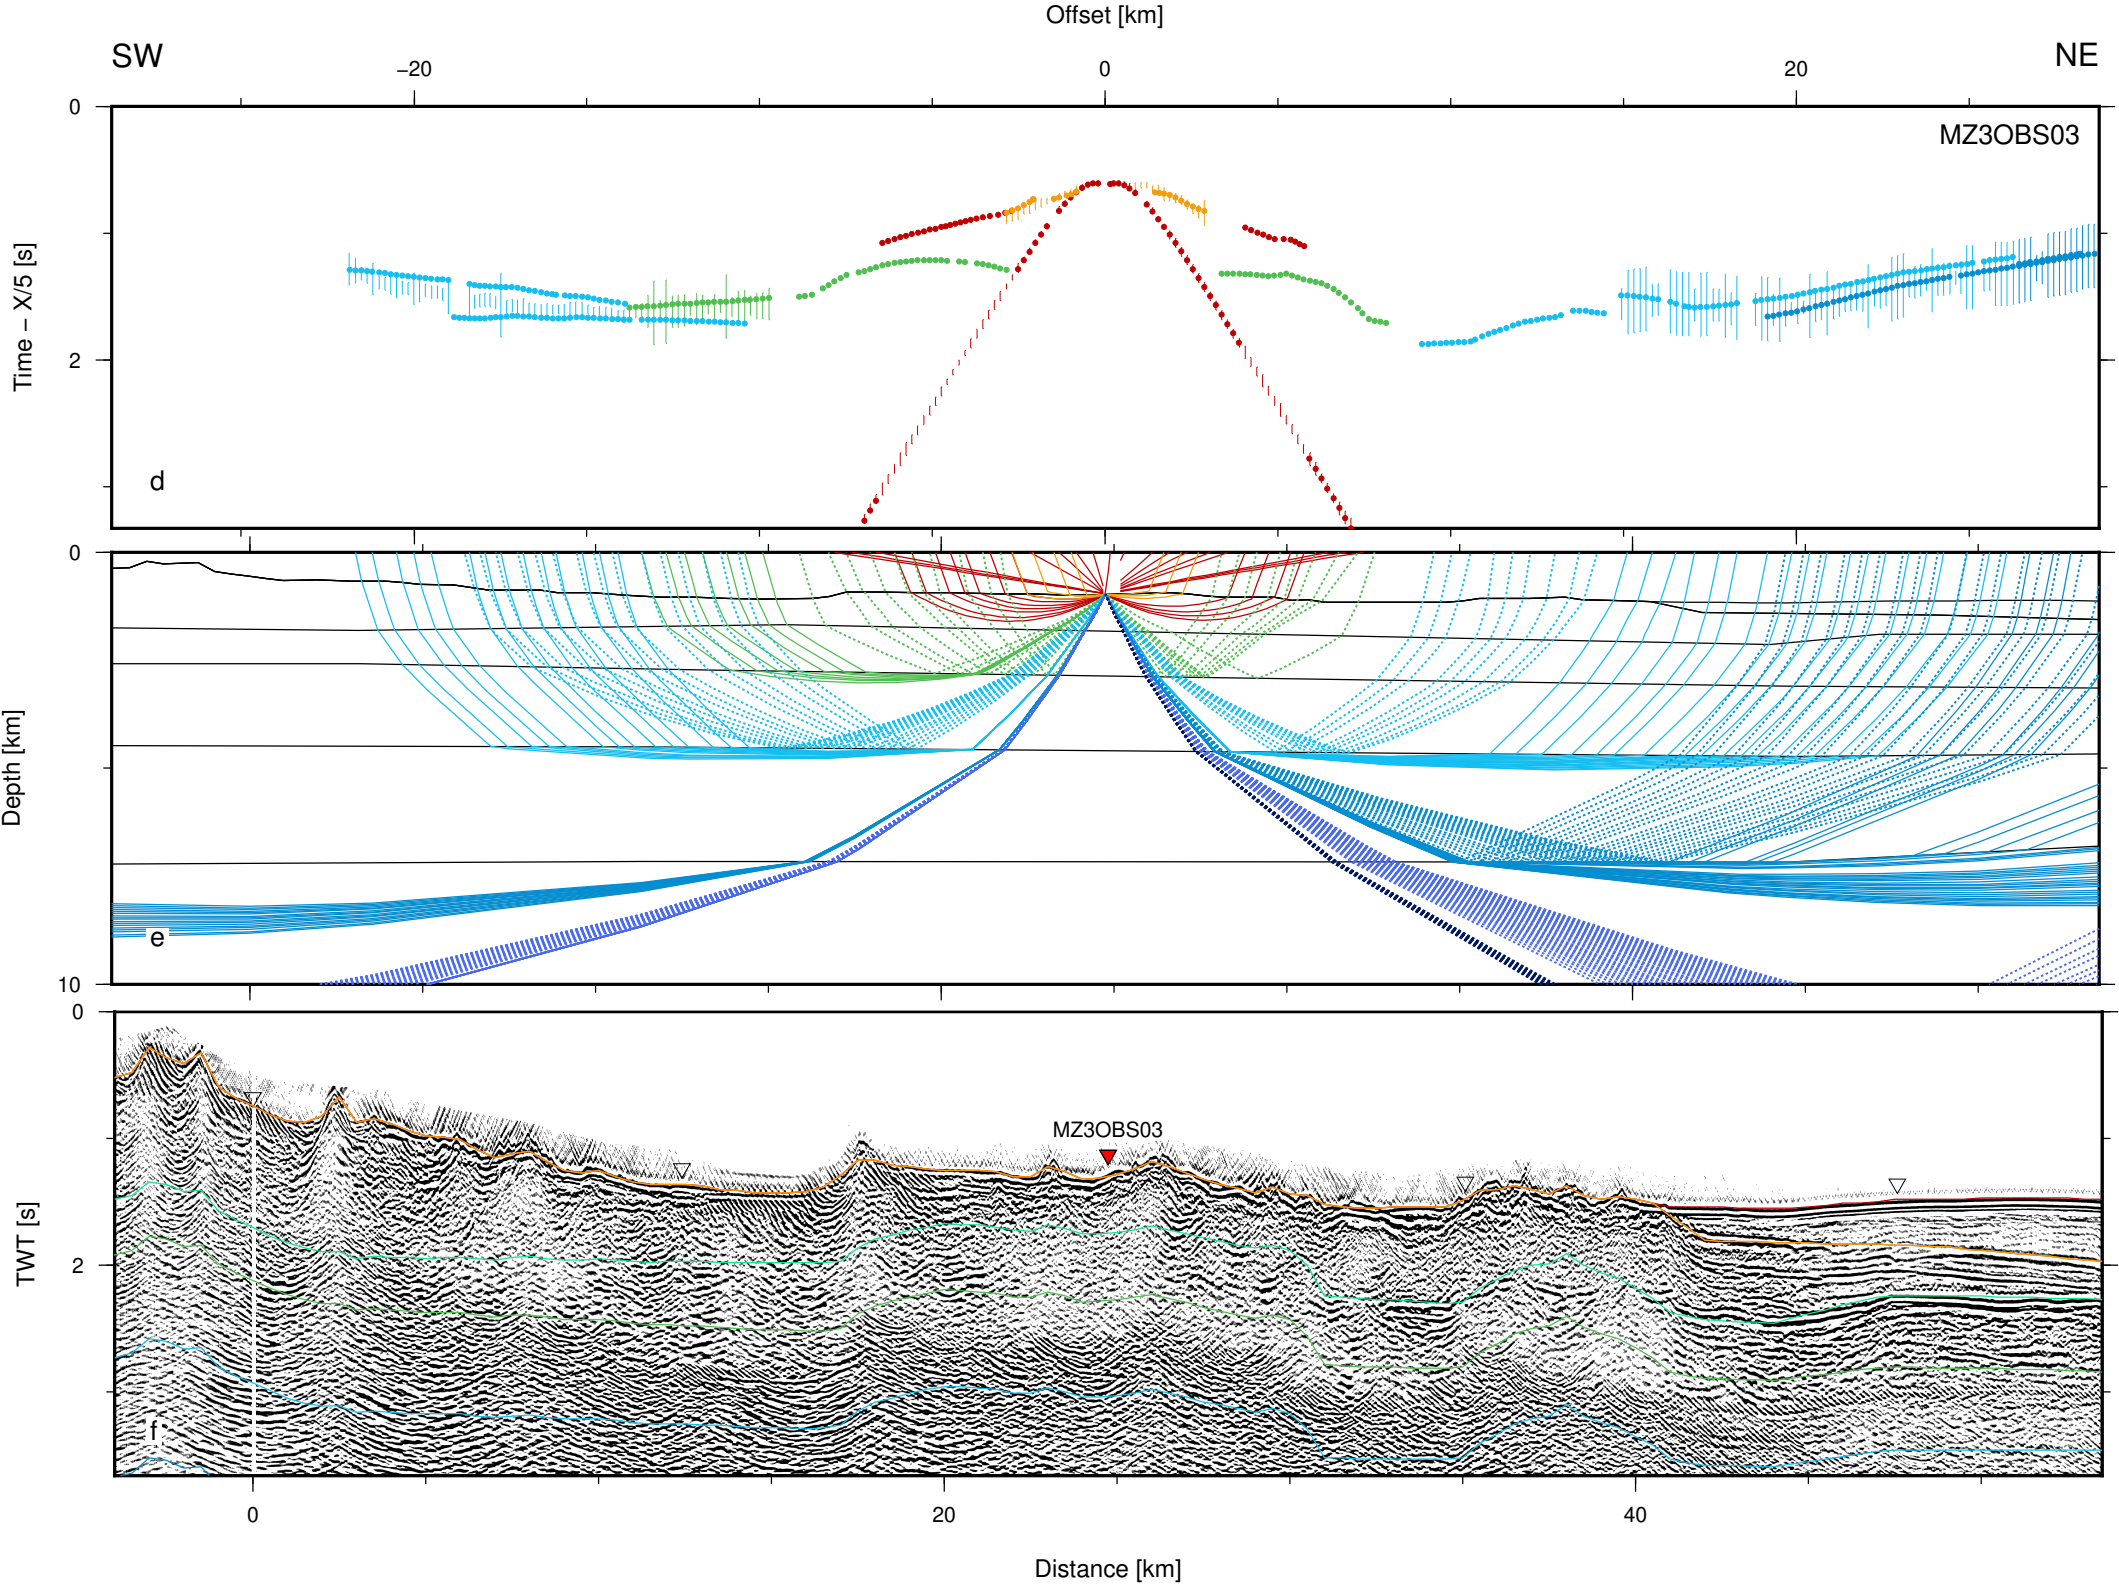

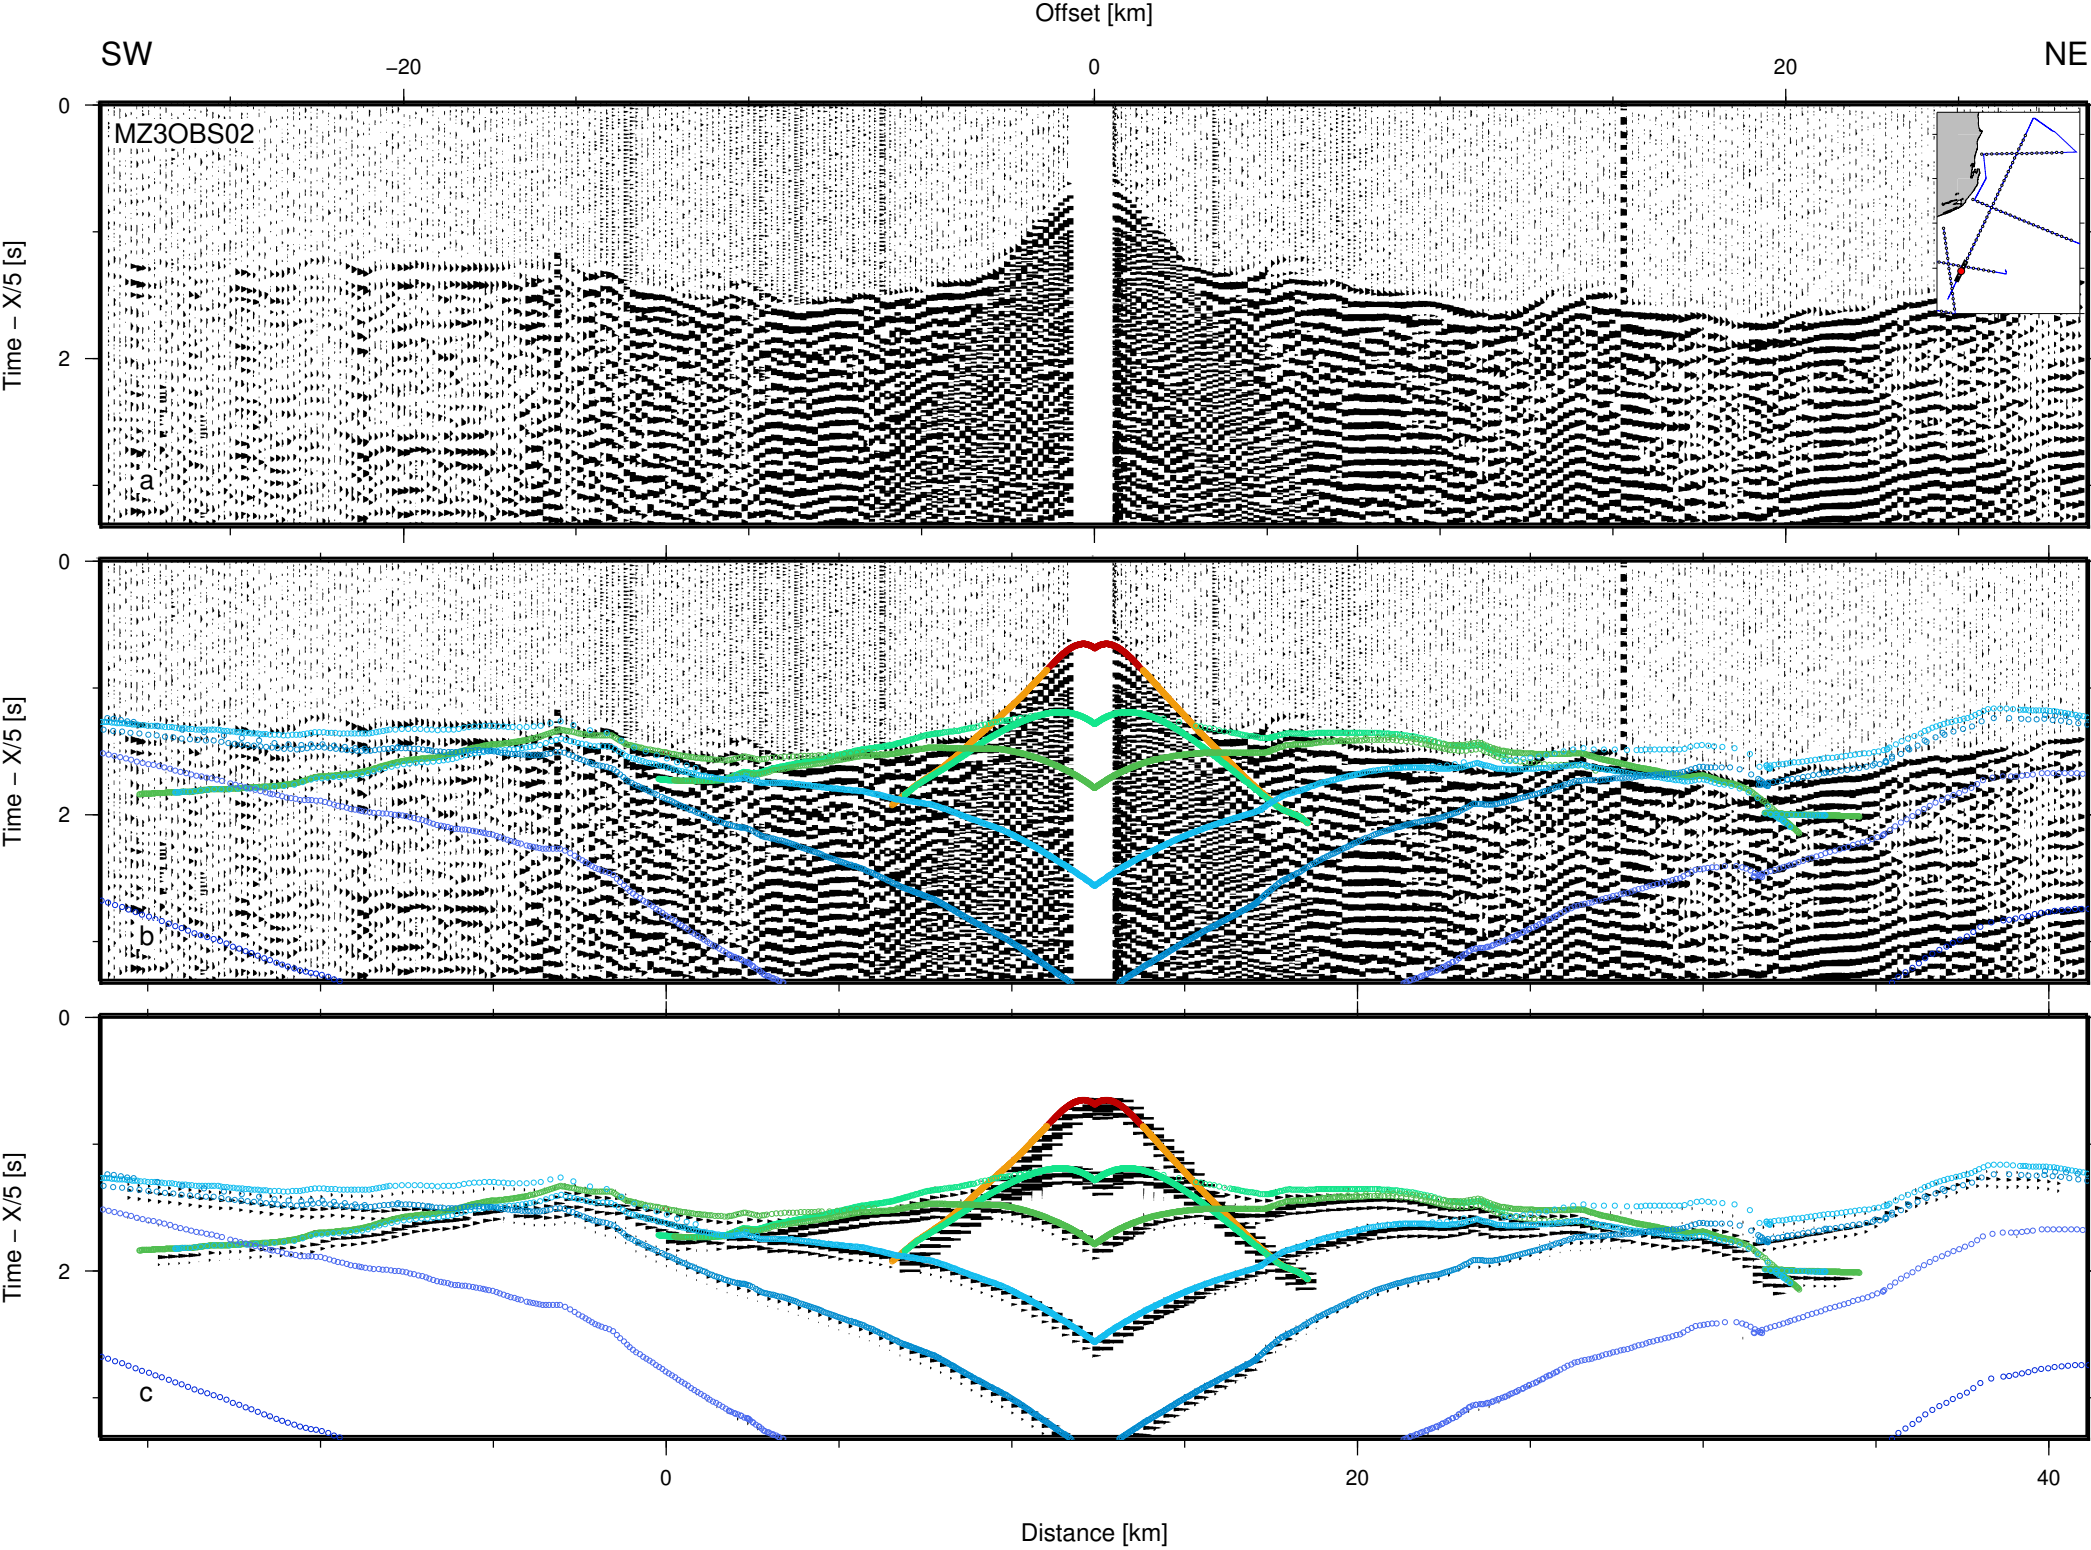



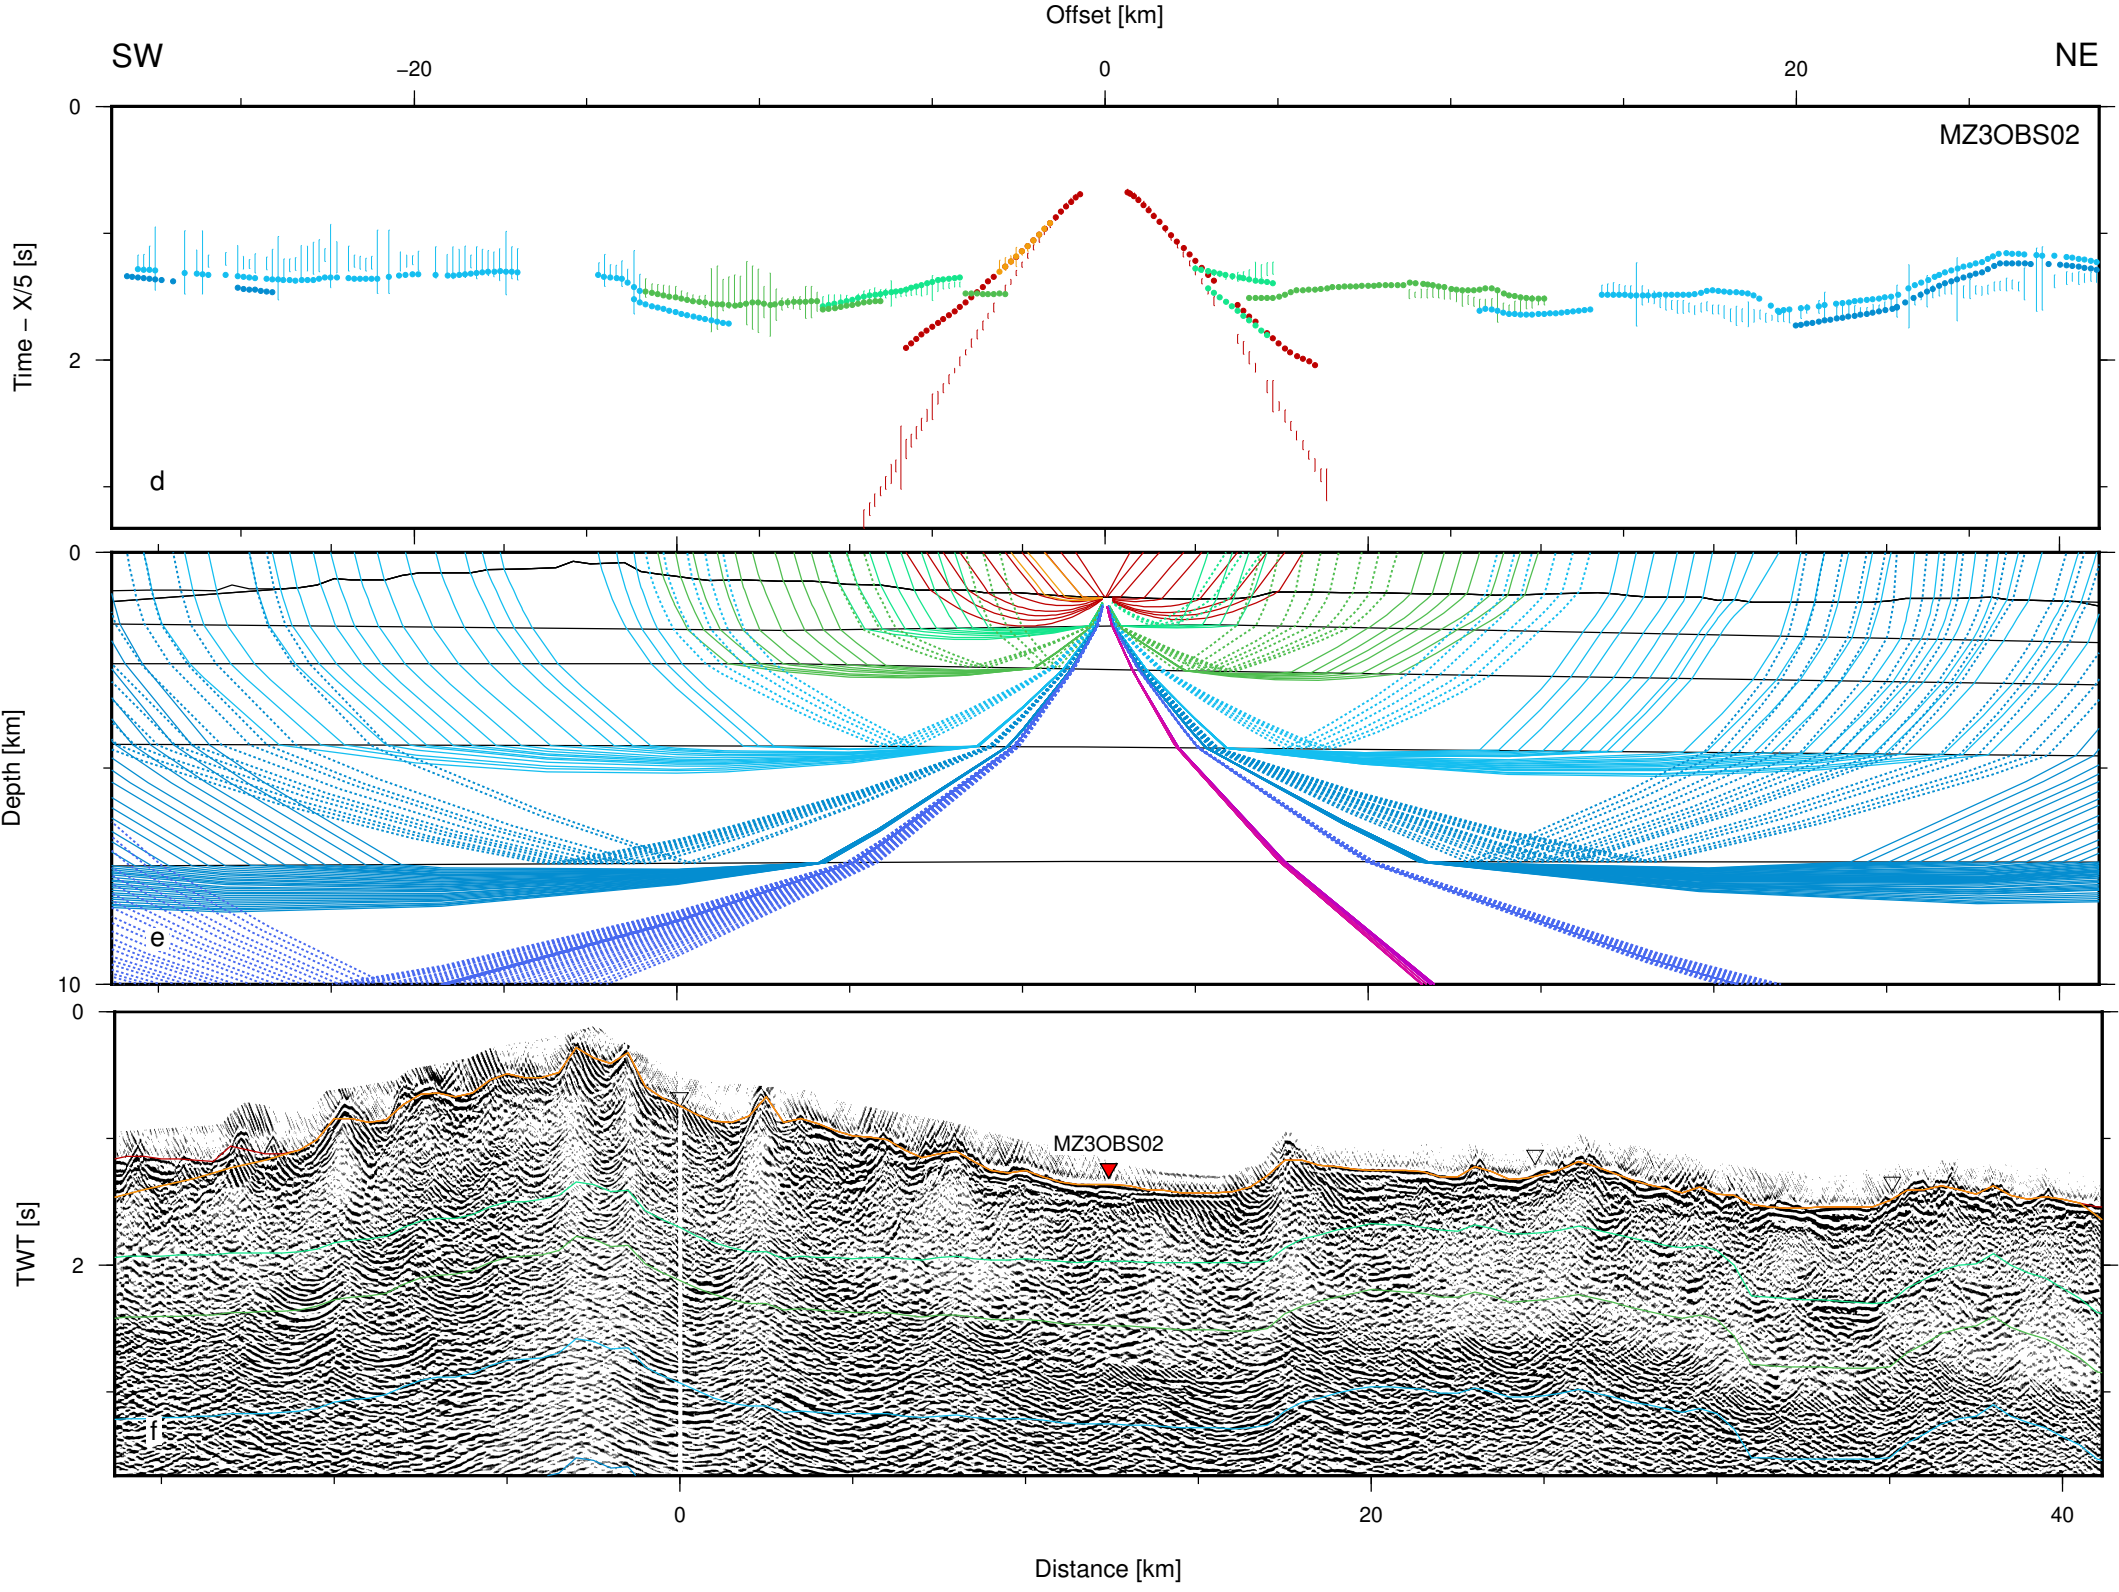

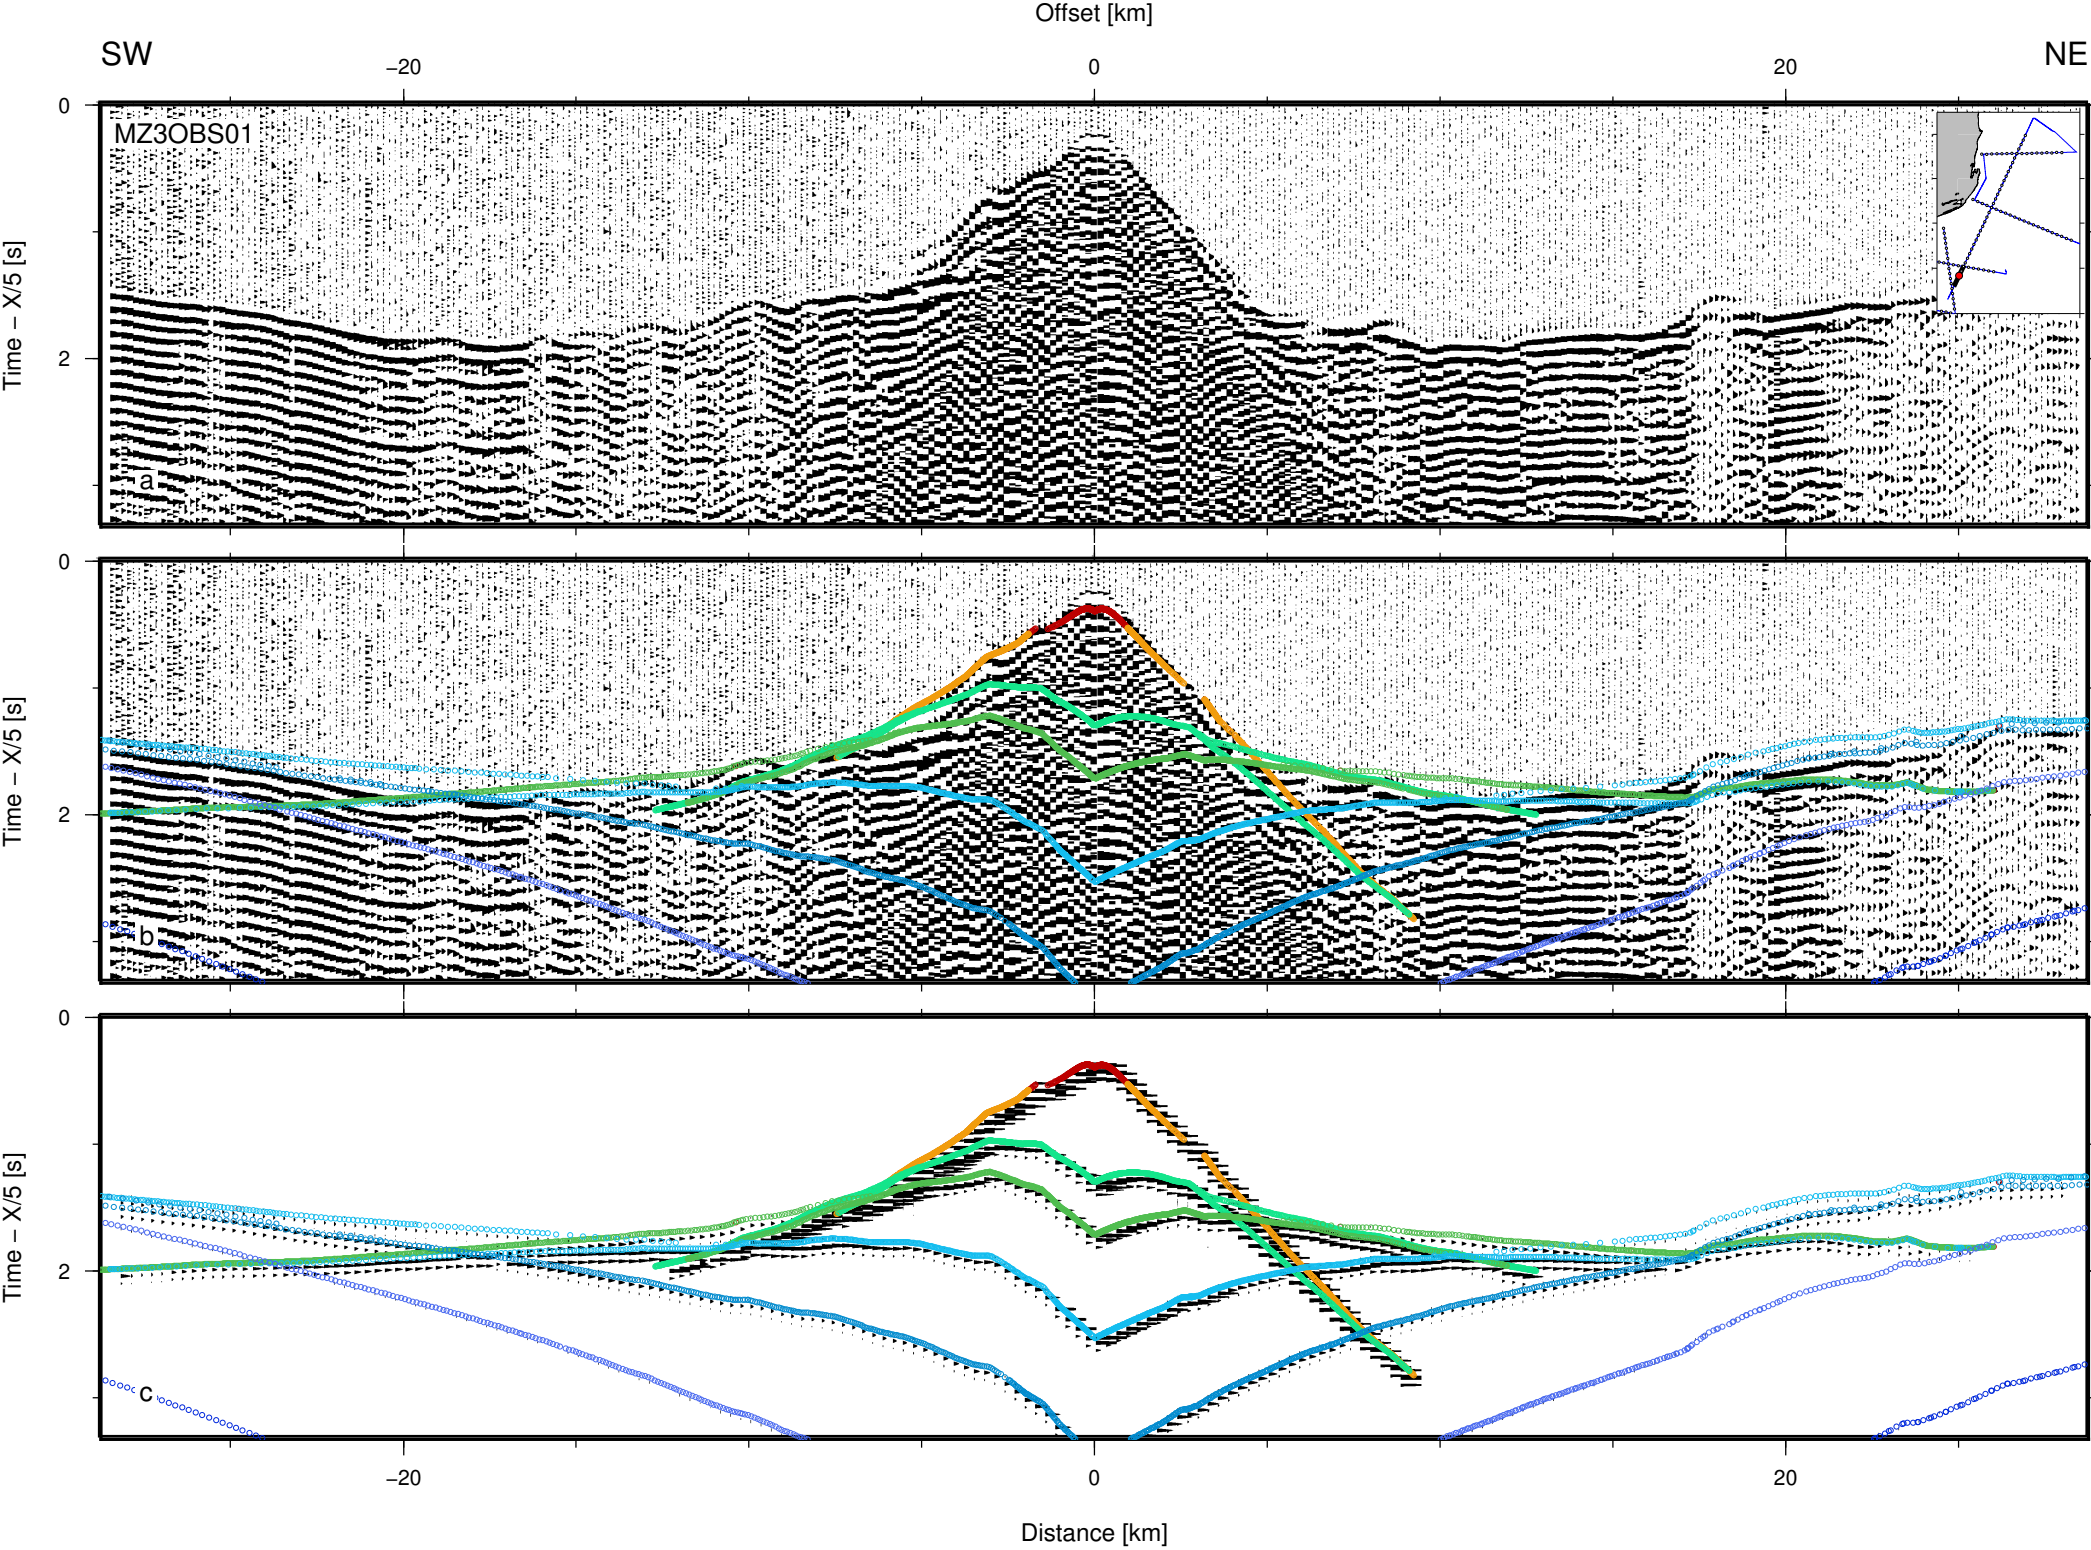



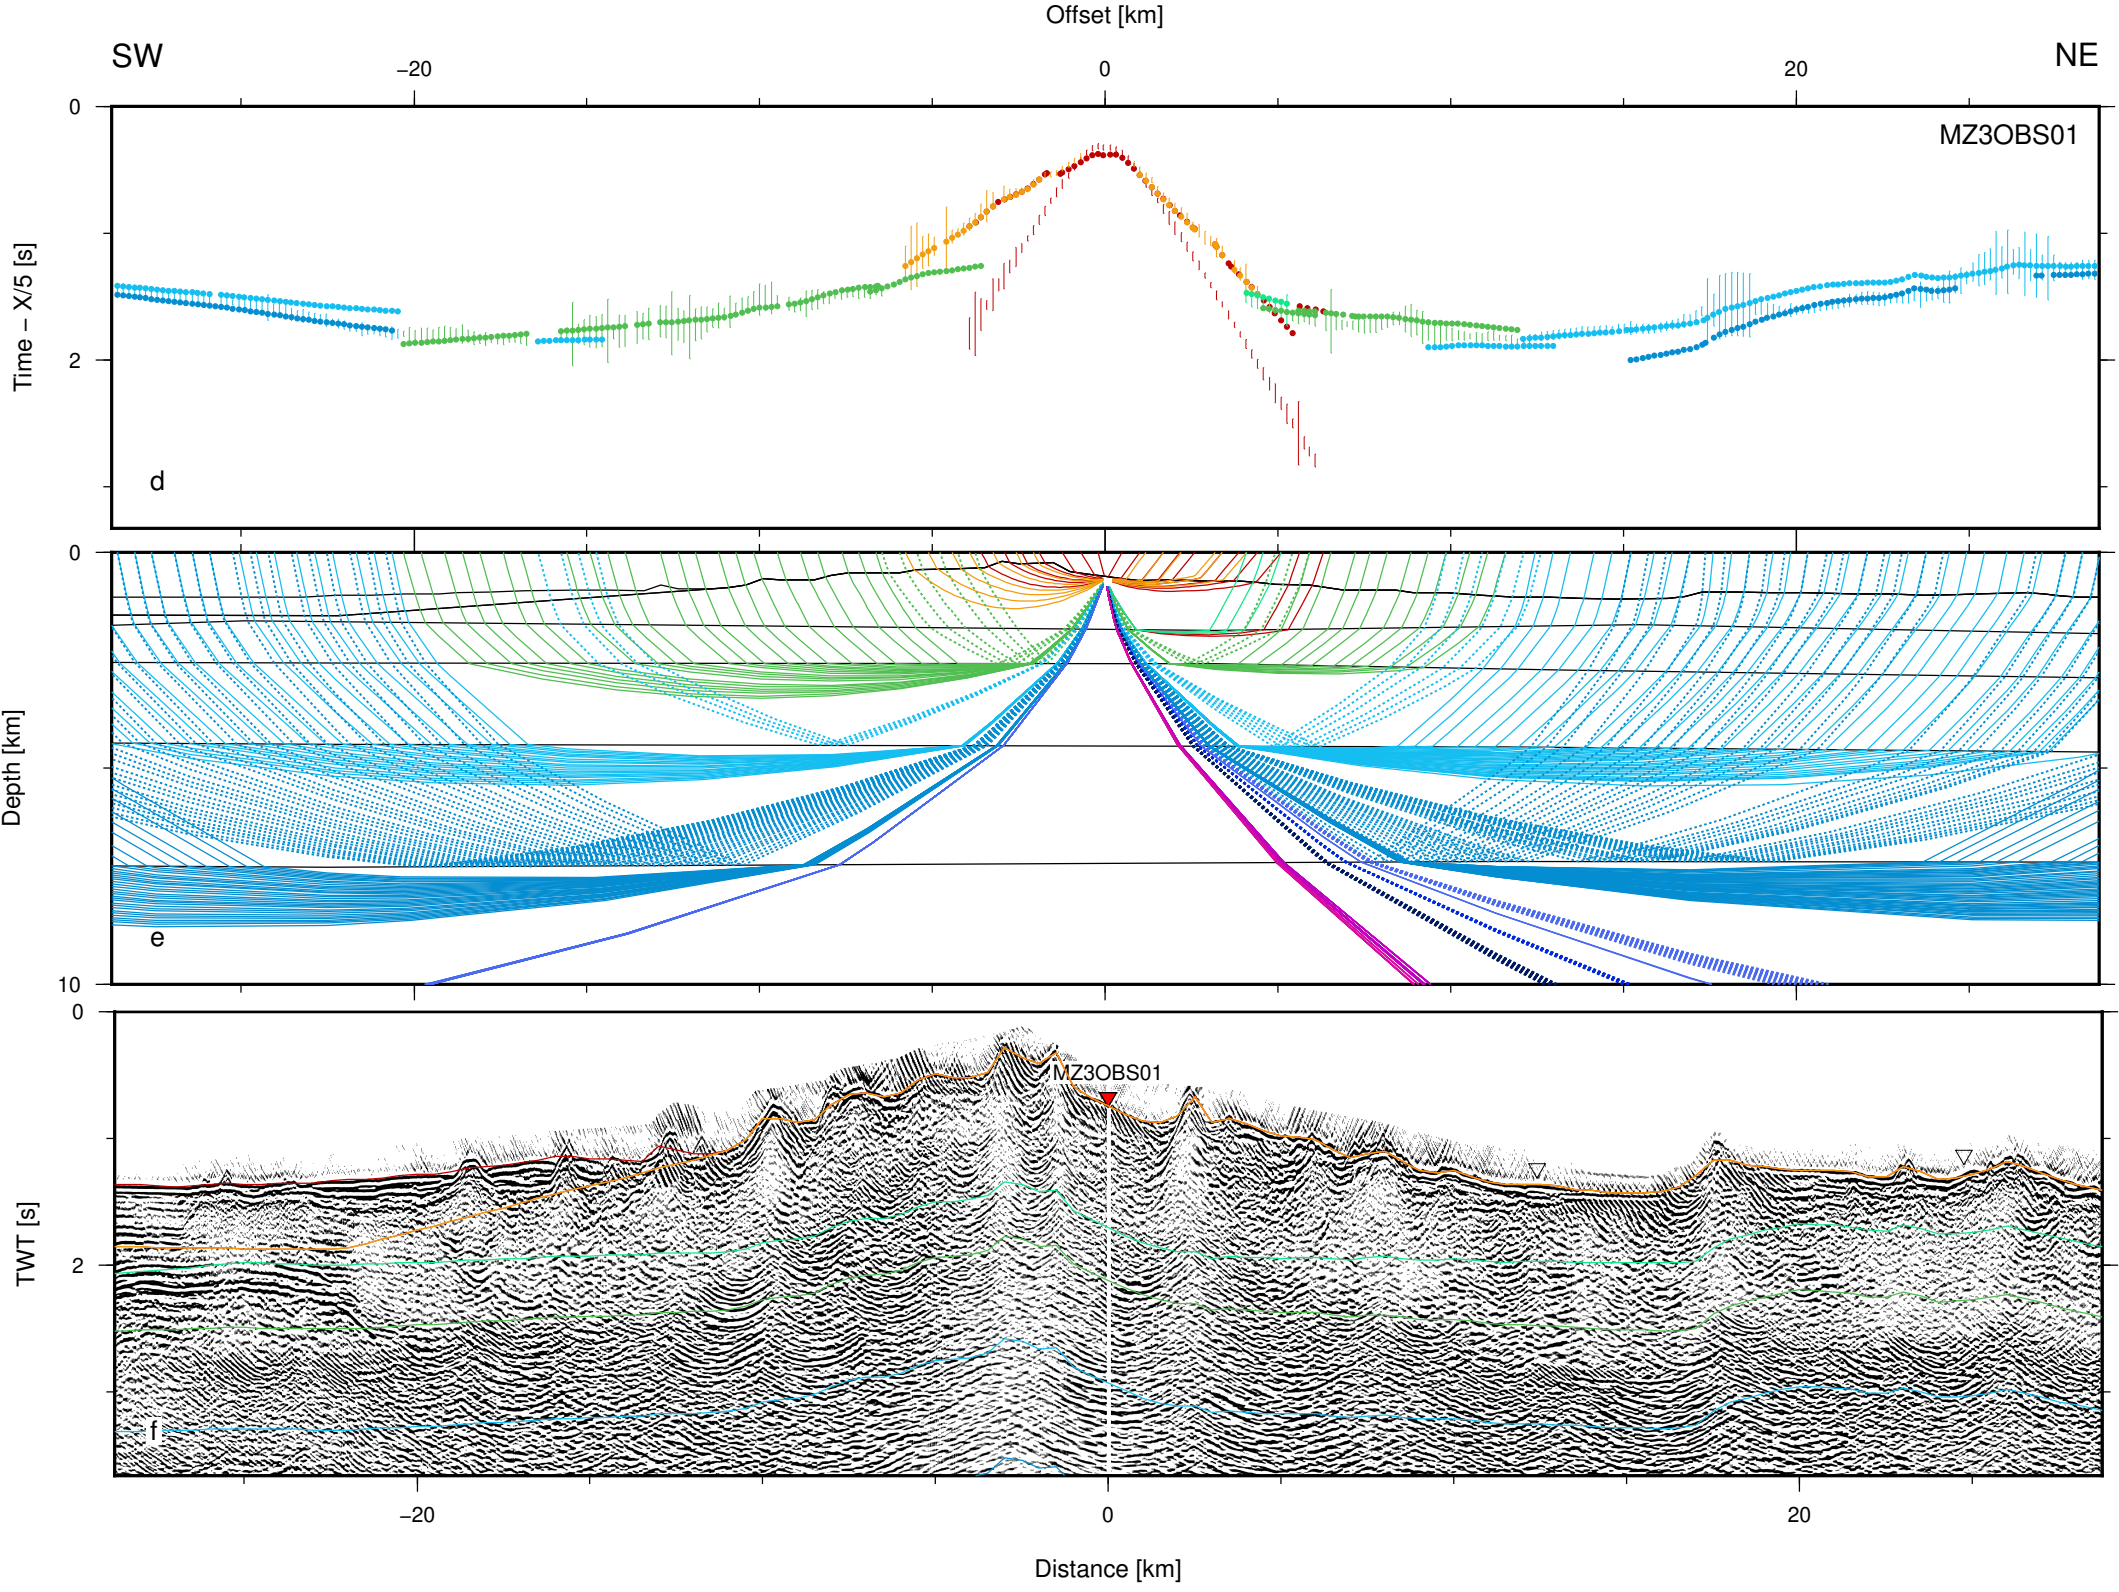

**Figure 2.** Interpreted crust and mantle seismic phases for all MZ3 OBS. Left panels represent negative offsets (toward the SW) and right panels positive offsets (toward the NE). On each side 6 panels display a) Seismic record; b) Seismic record with color-coded predicted arrivals; c) Synthetic section with color coded predicted arrivals; d) Color coded picked travel-times with uncertainty bars overlain by dotted predicted times; e) Color coded seismic rays; f) MCS time migrated section with color-coded model interfaces. On a, b, c, and d, travel-time is reduced by a velocity of 7 km/s.



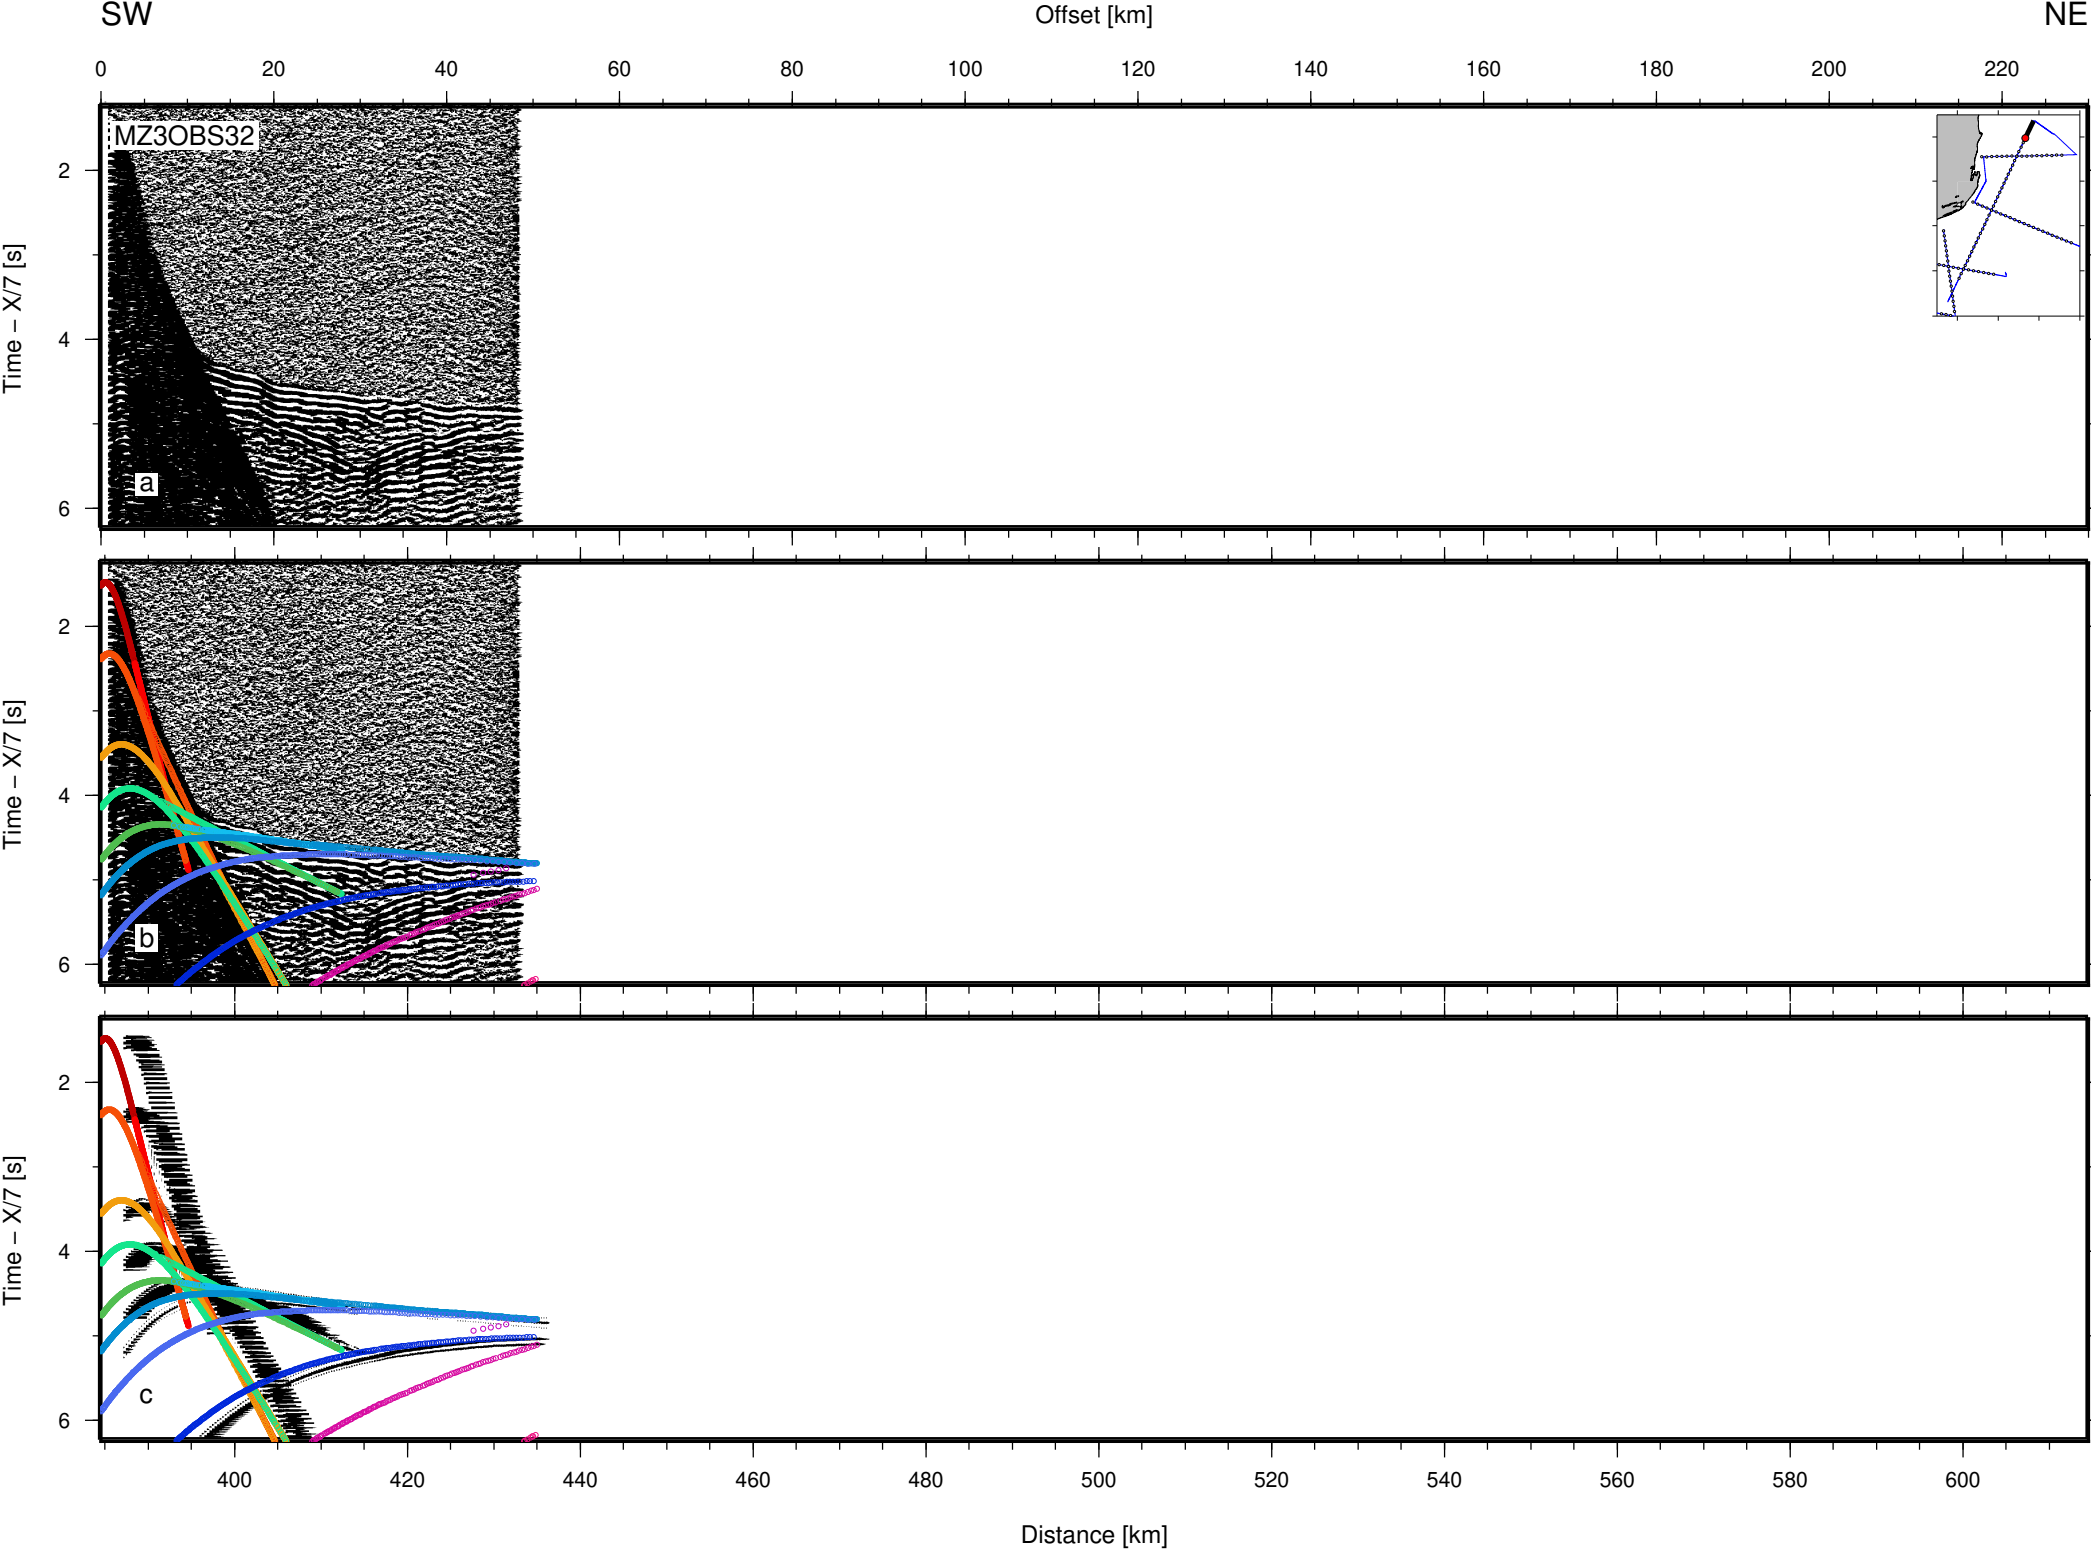

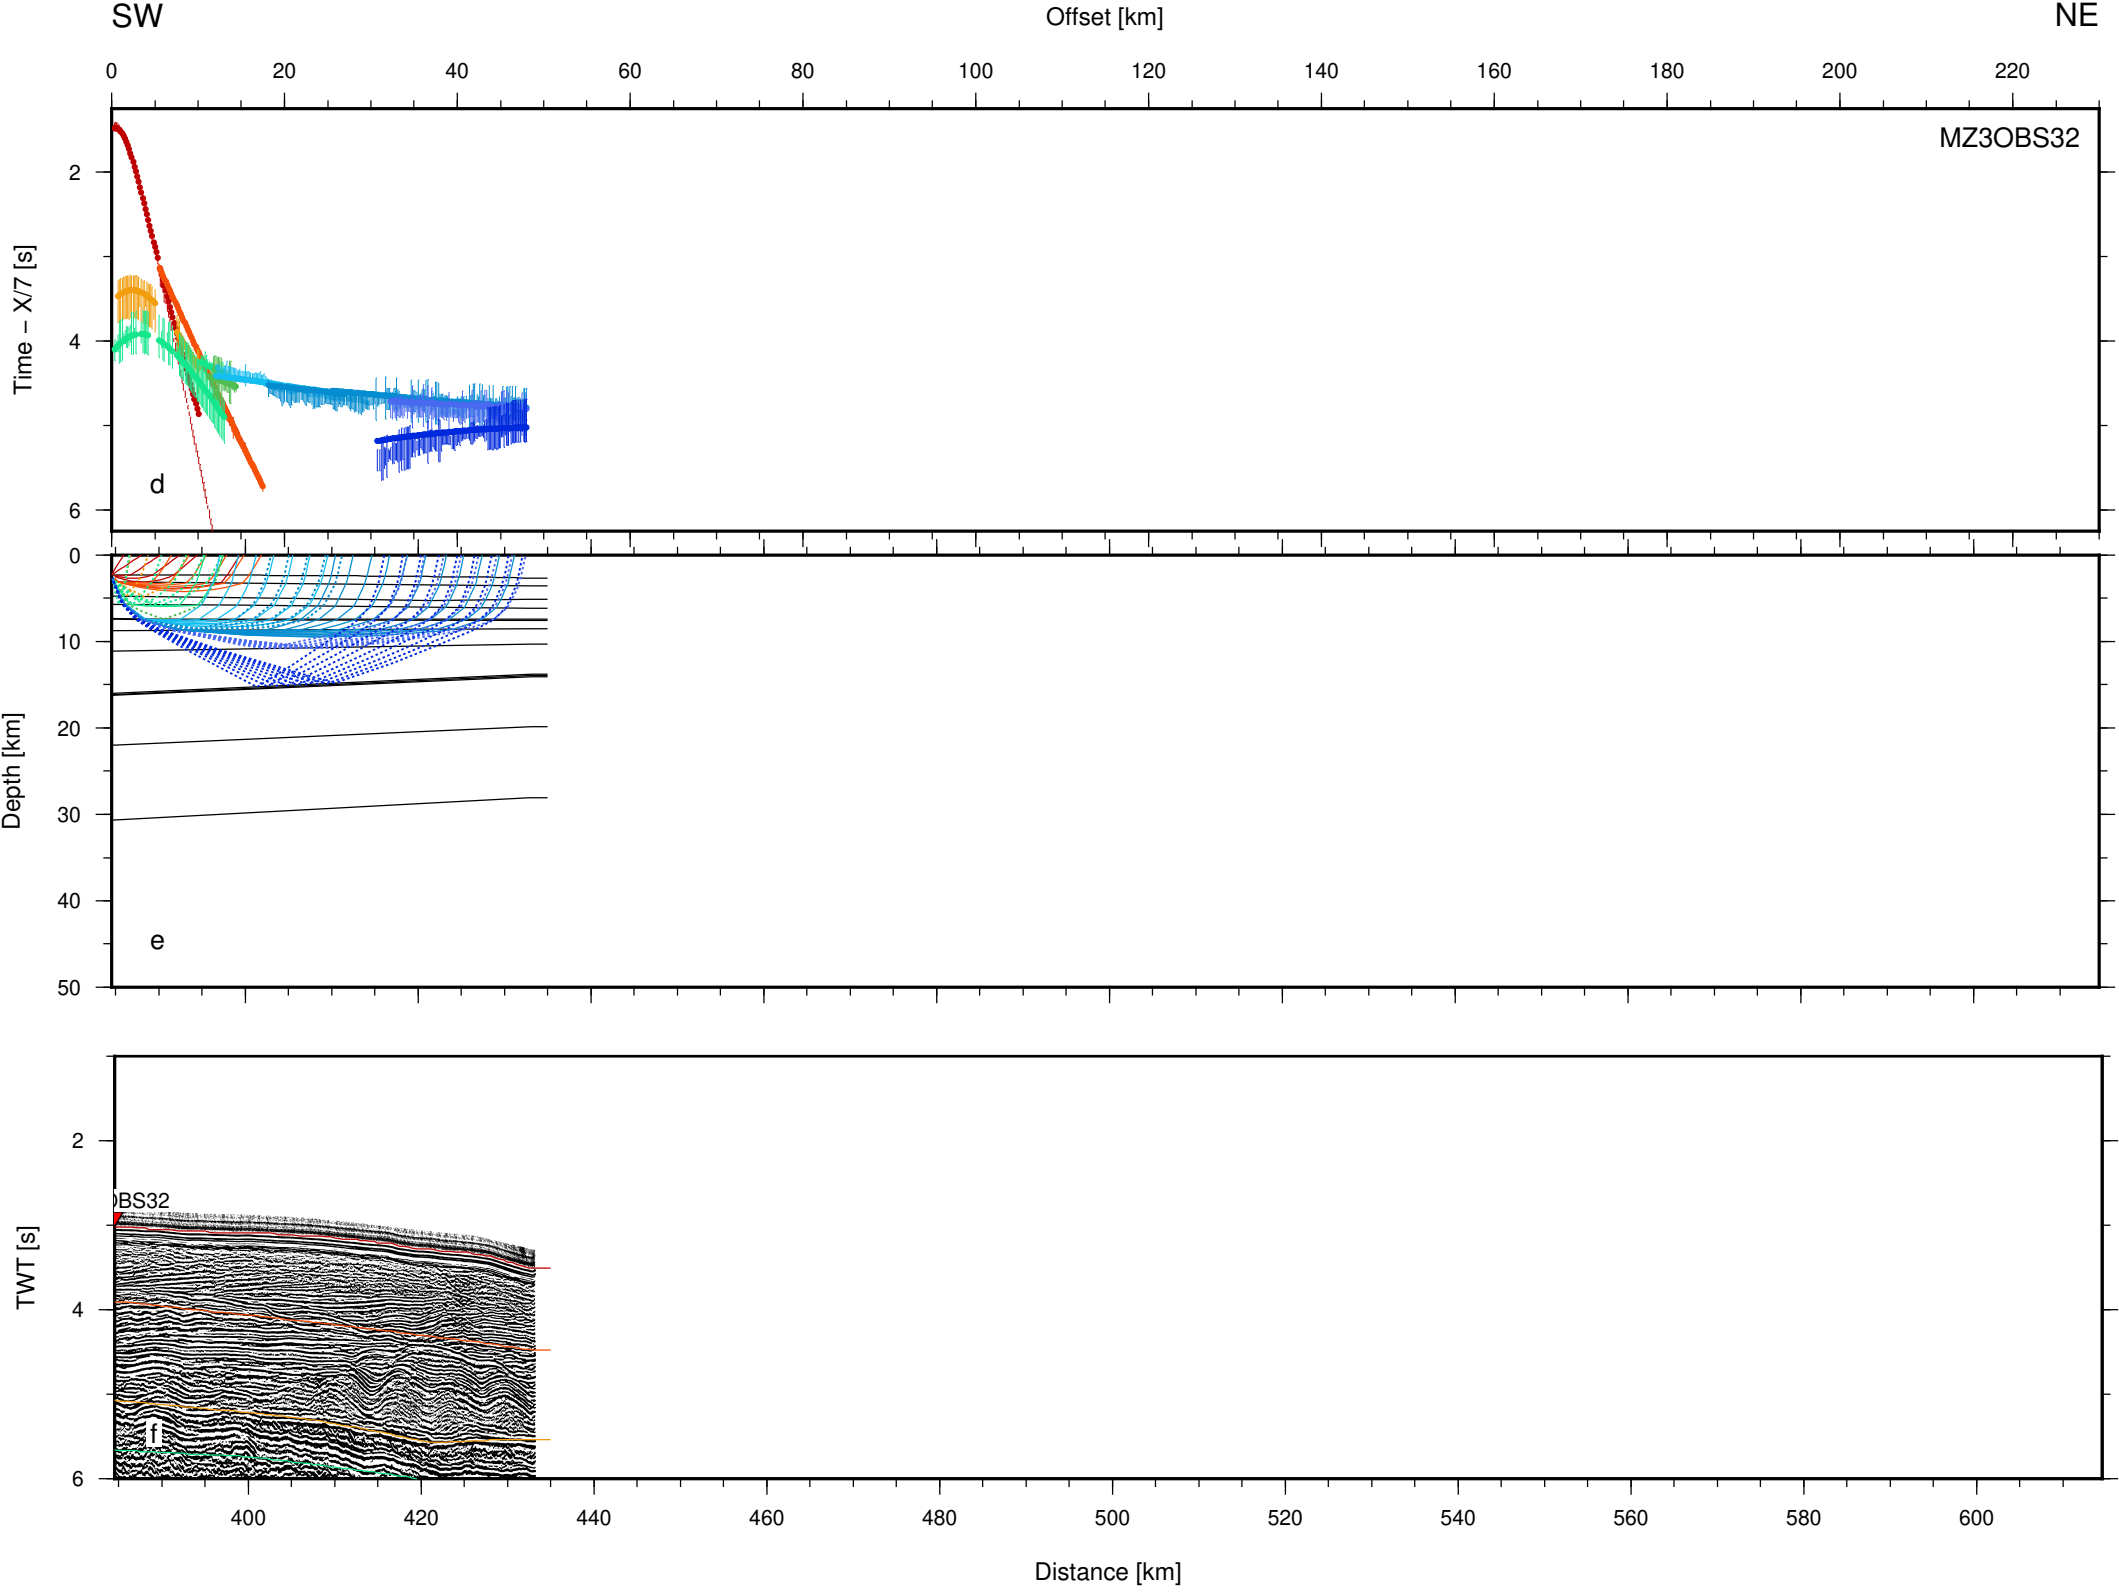



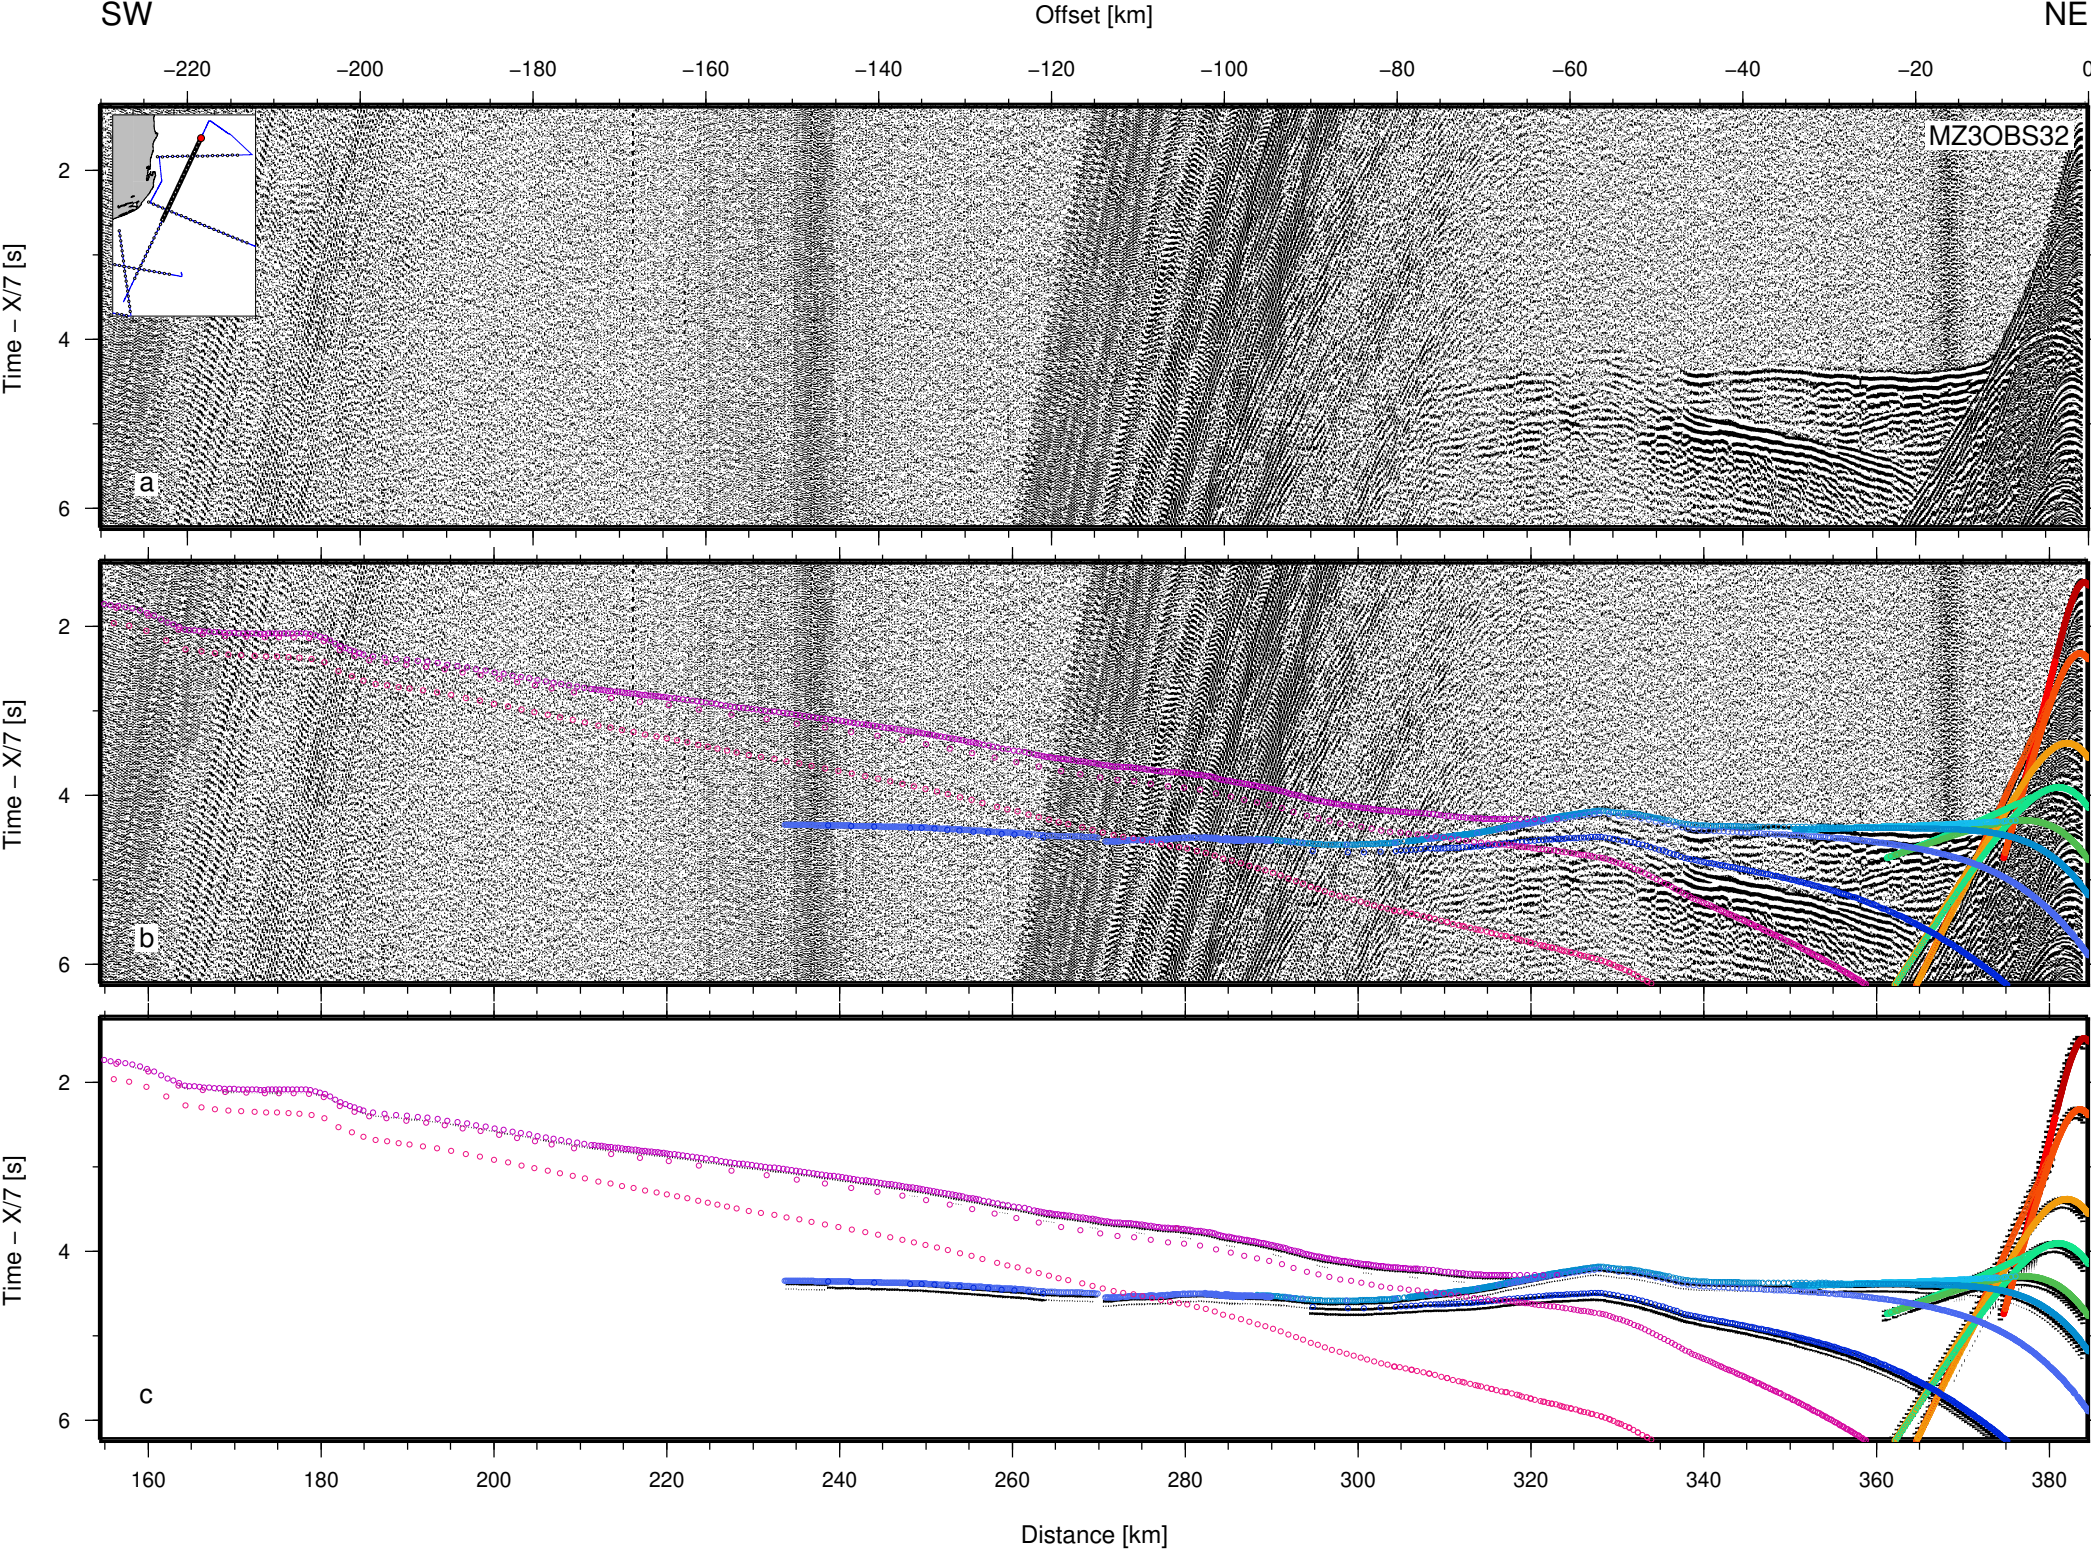



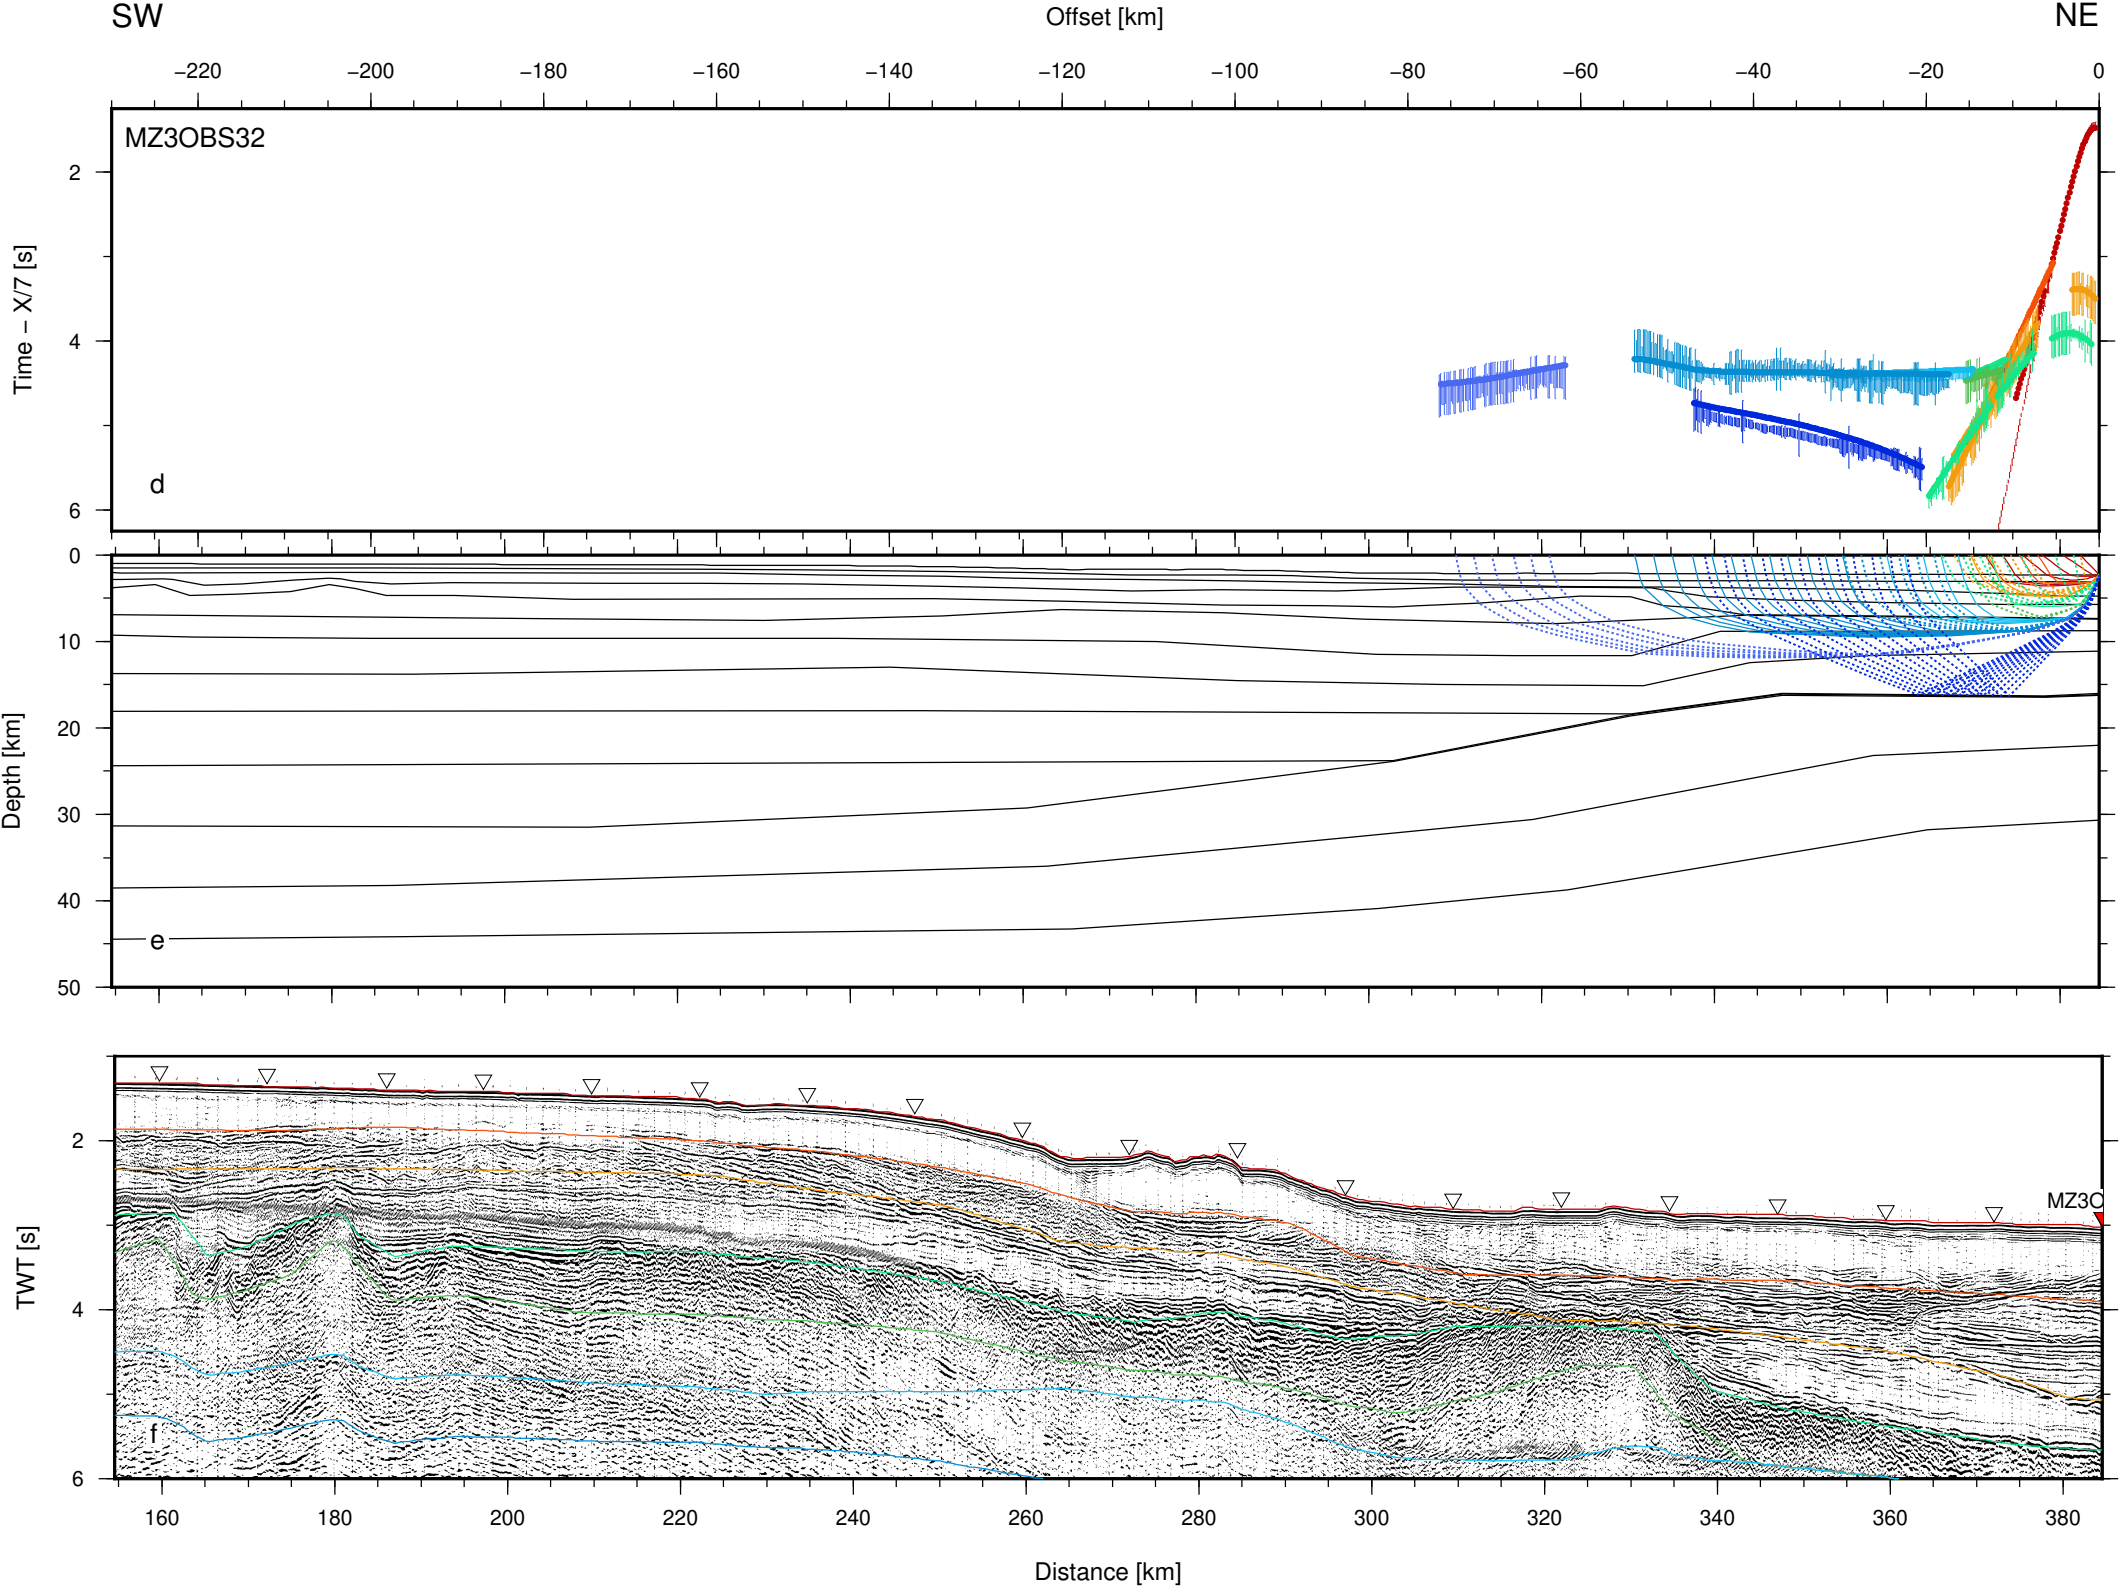



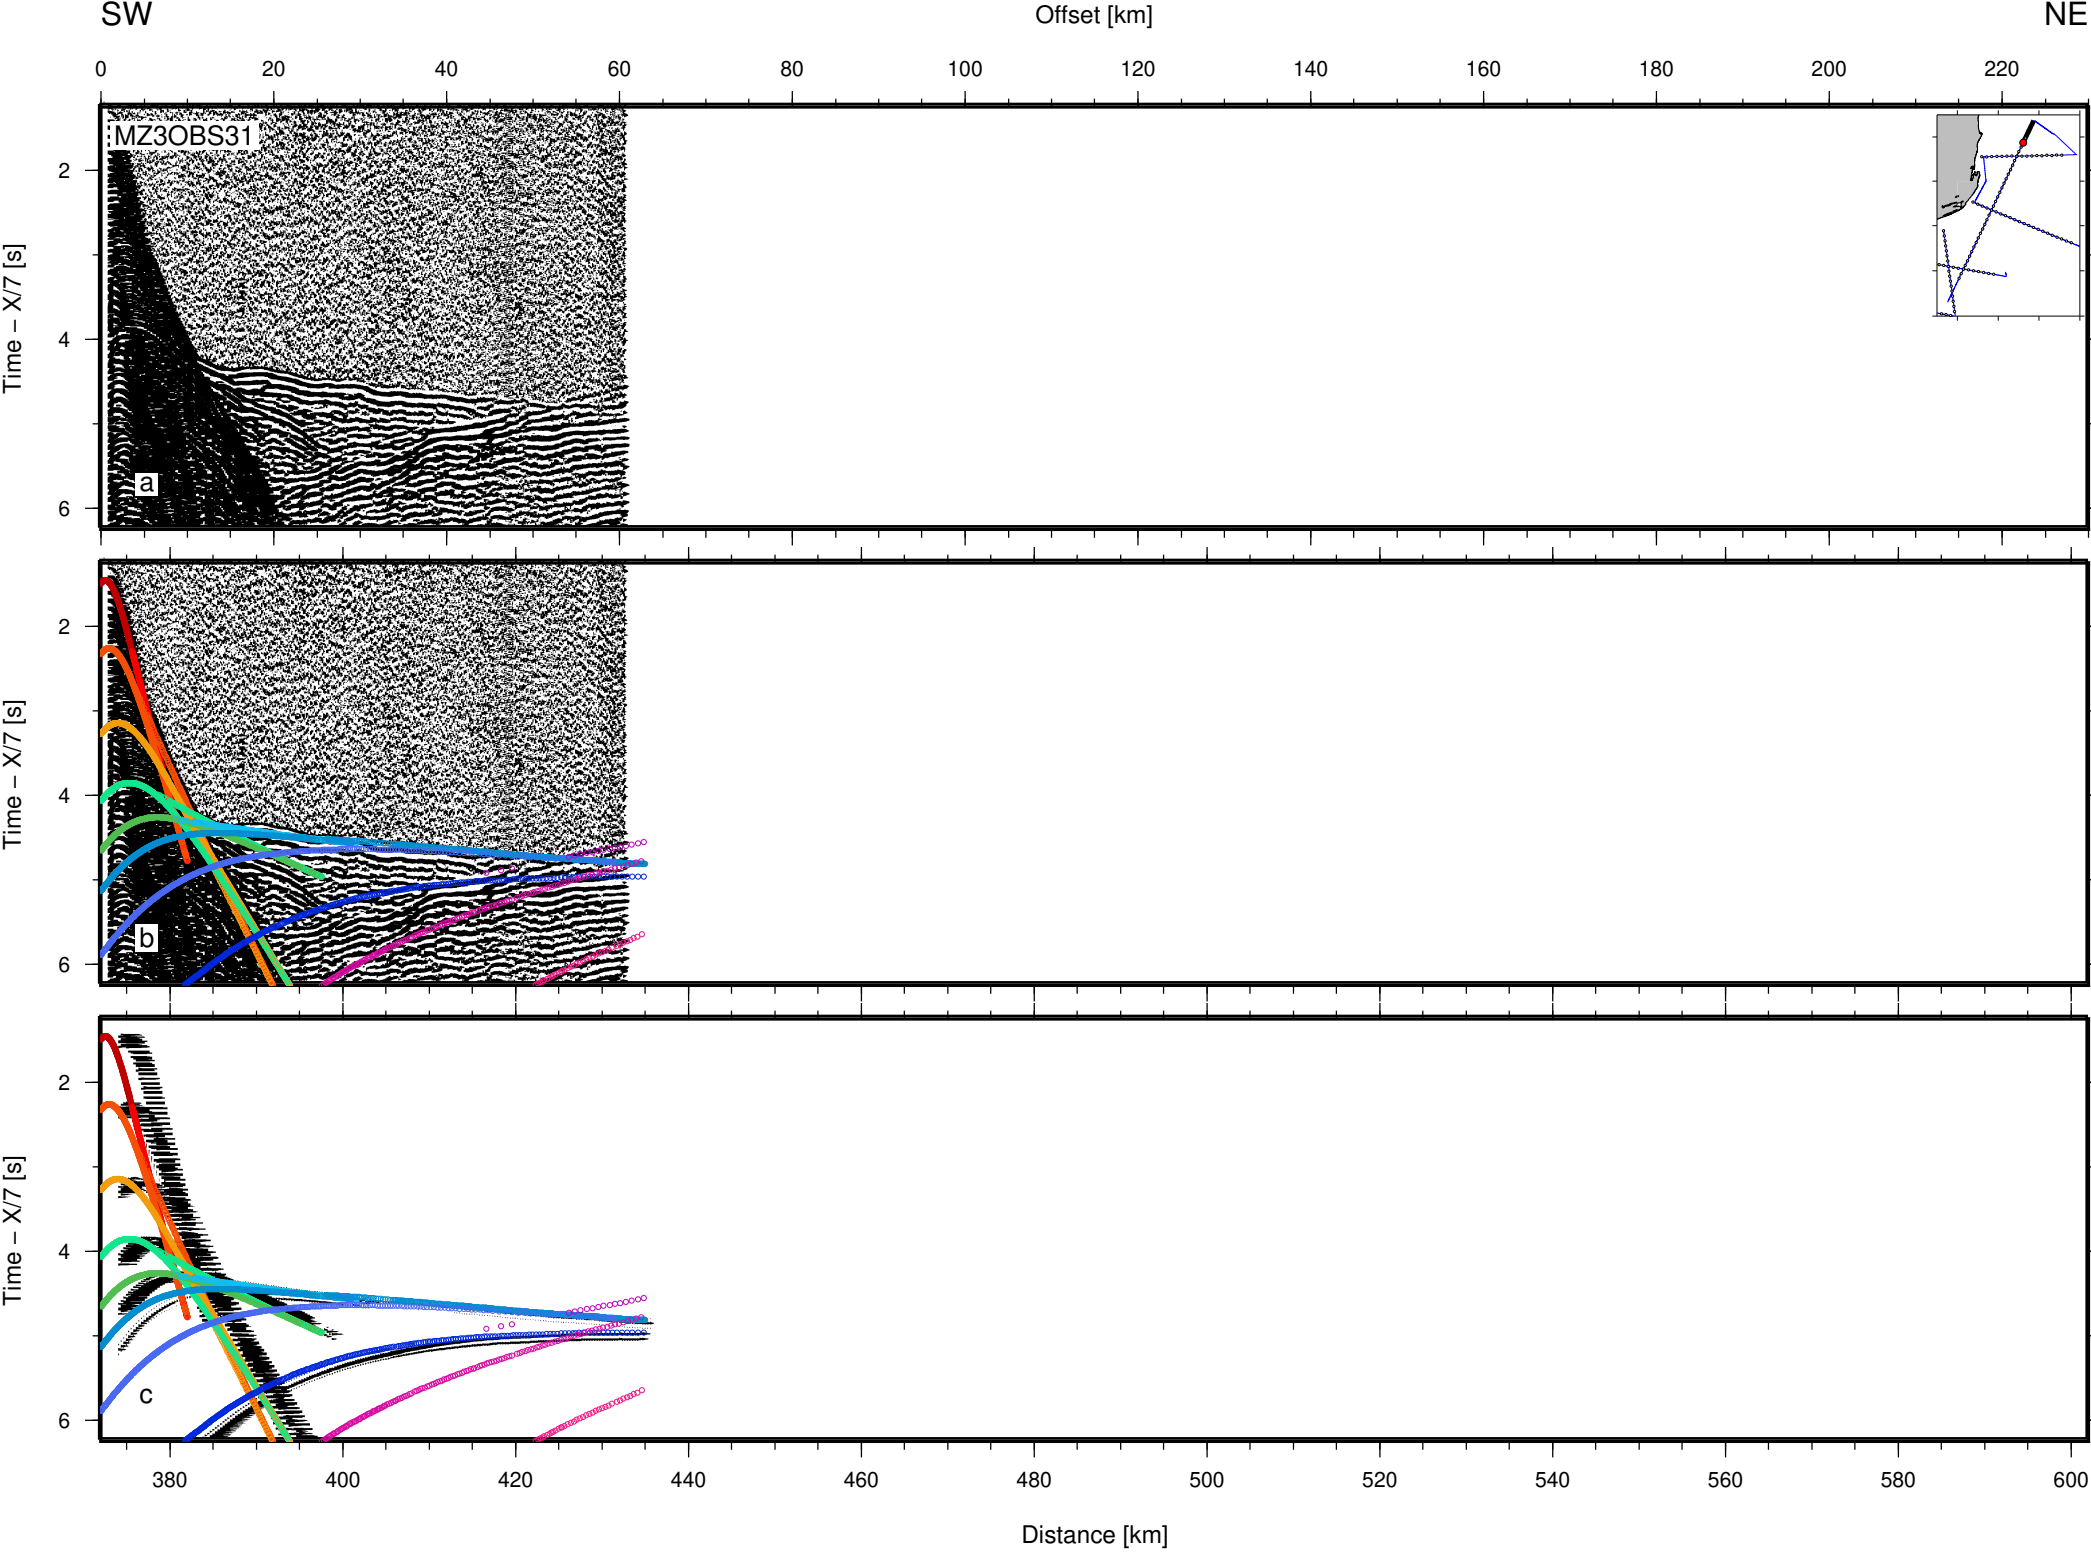

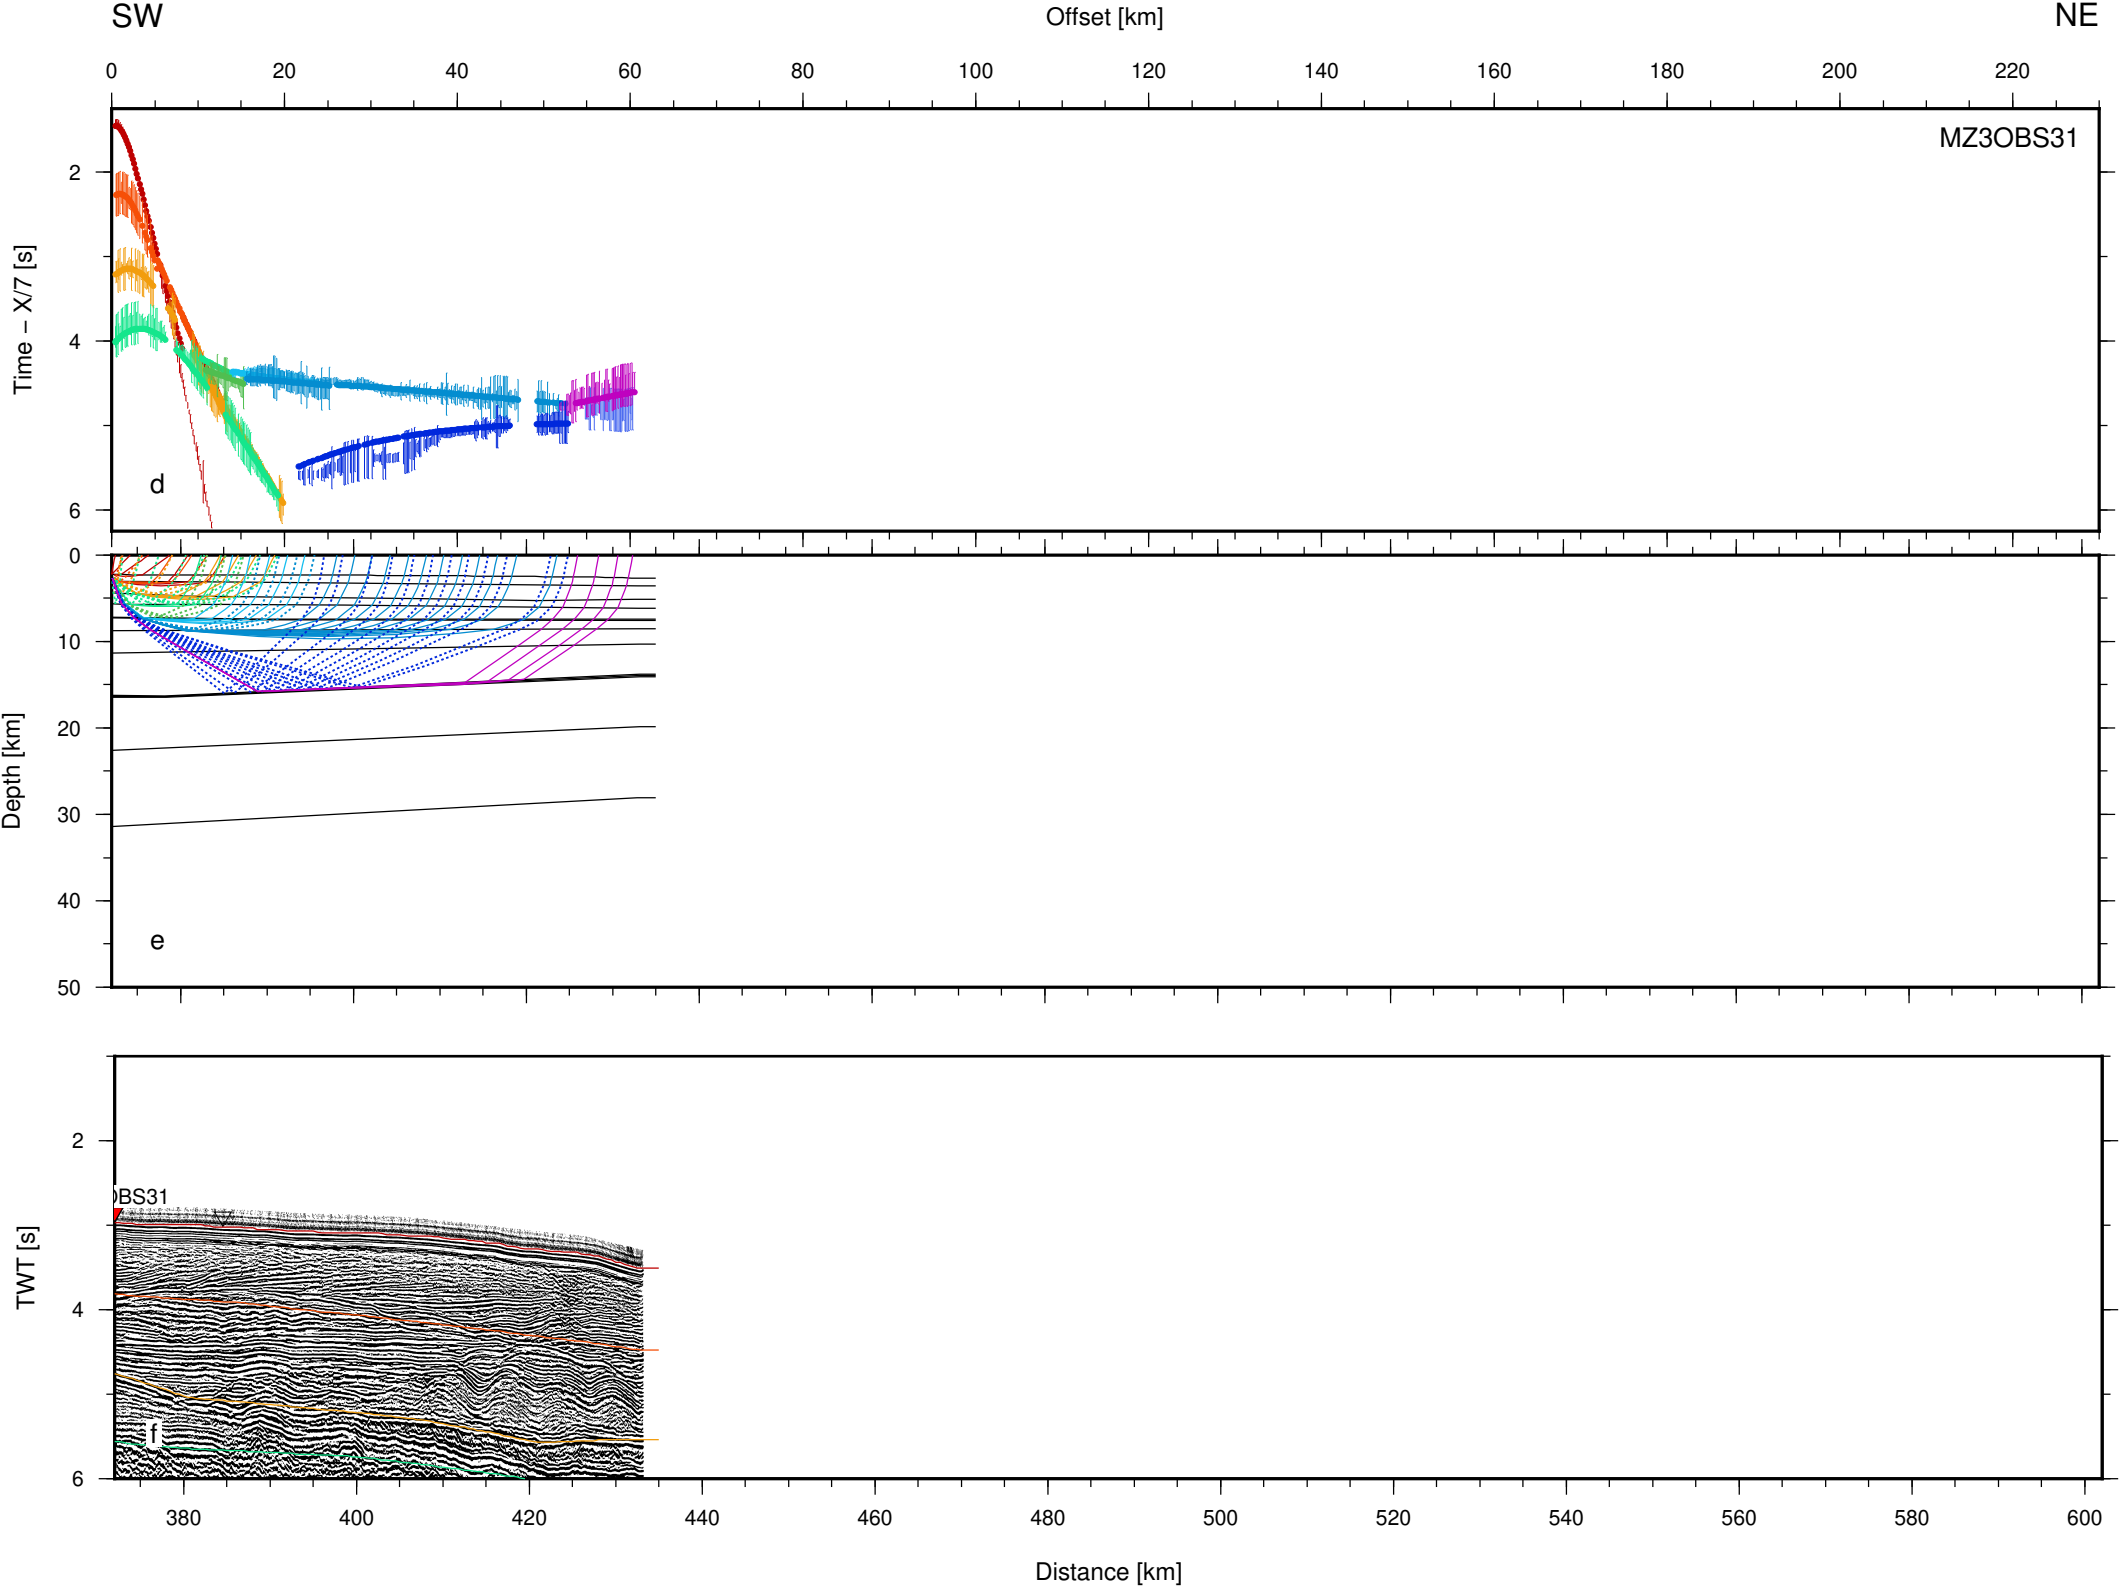



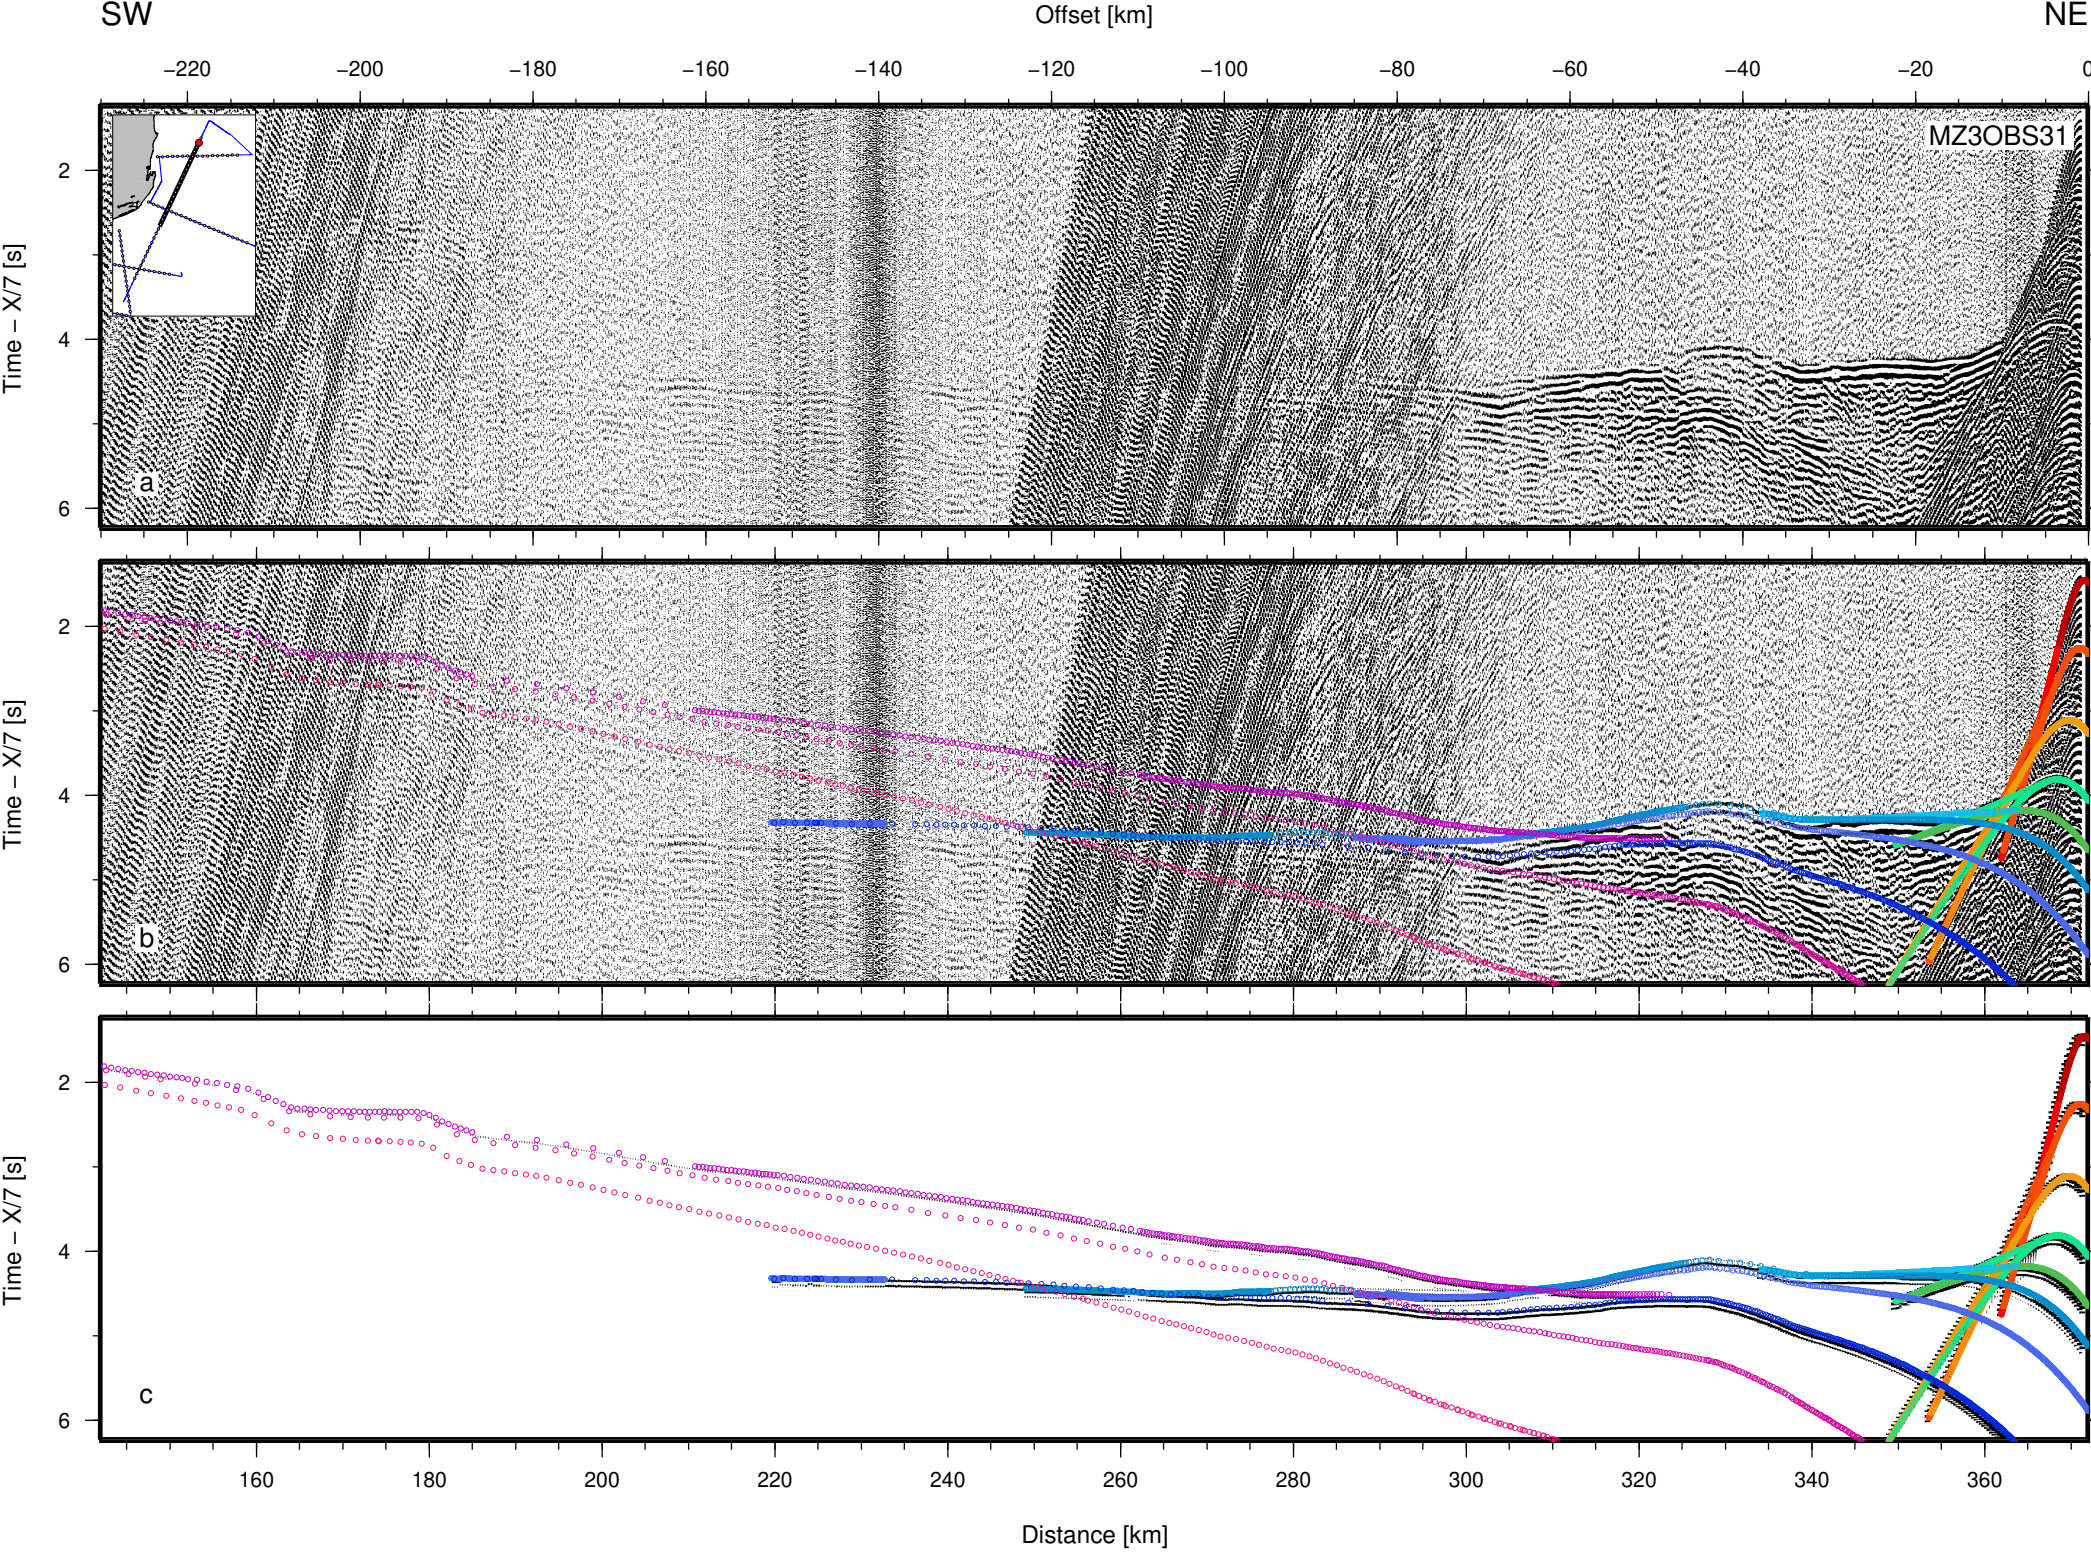



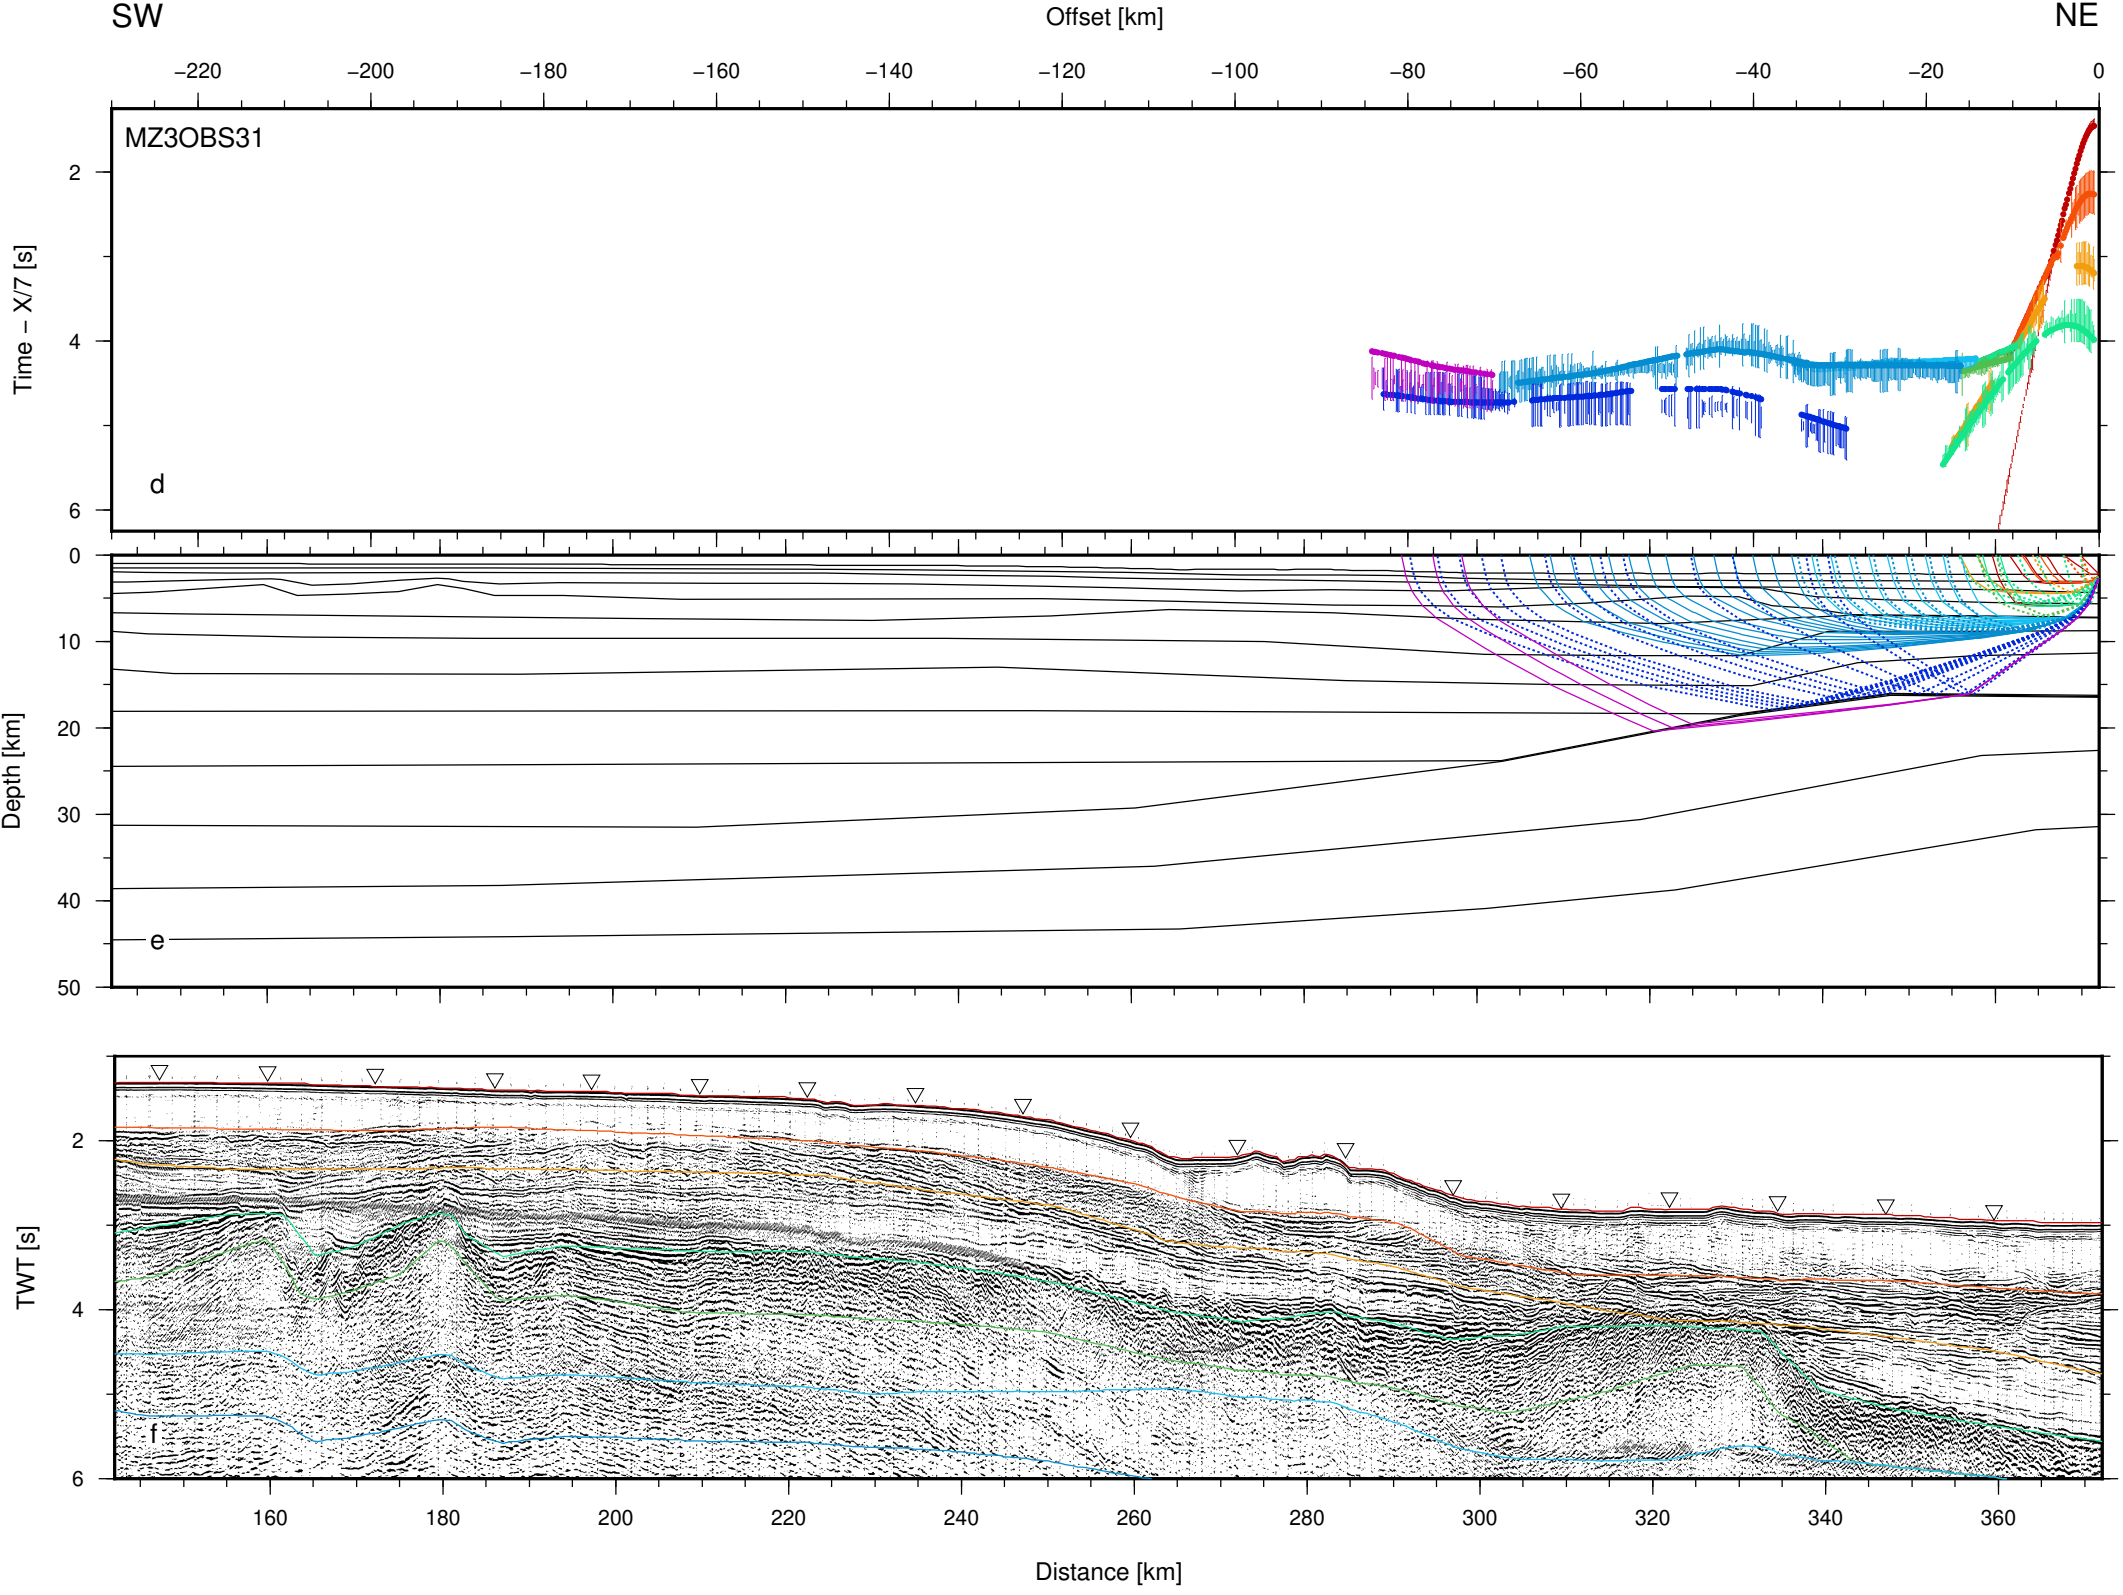



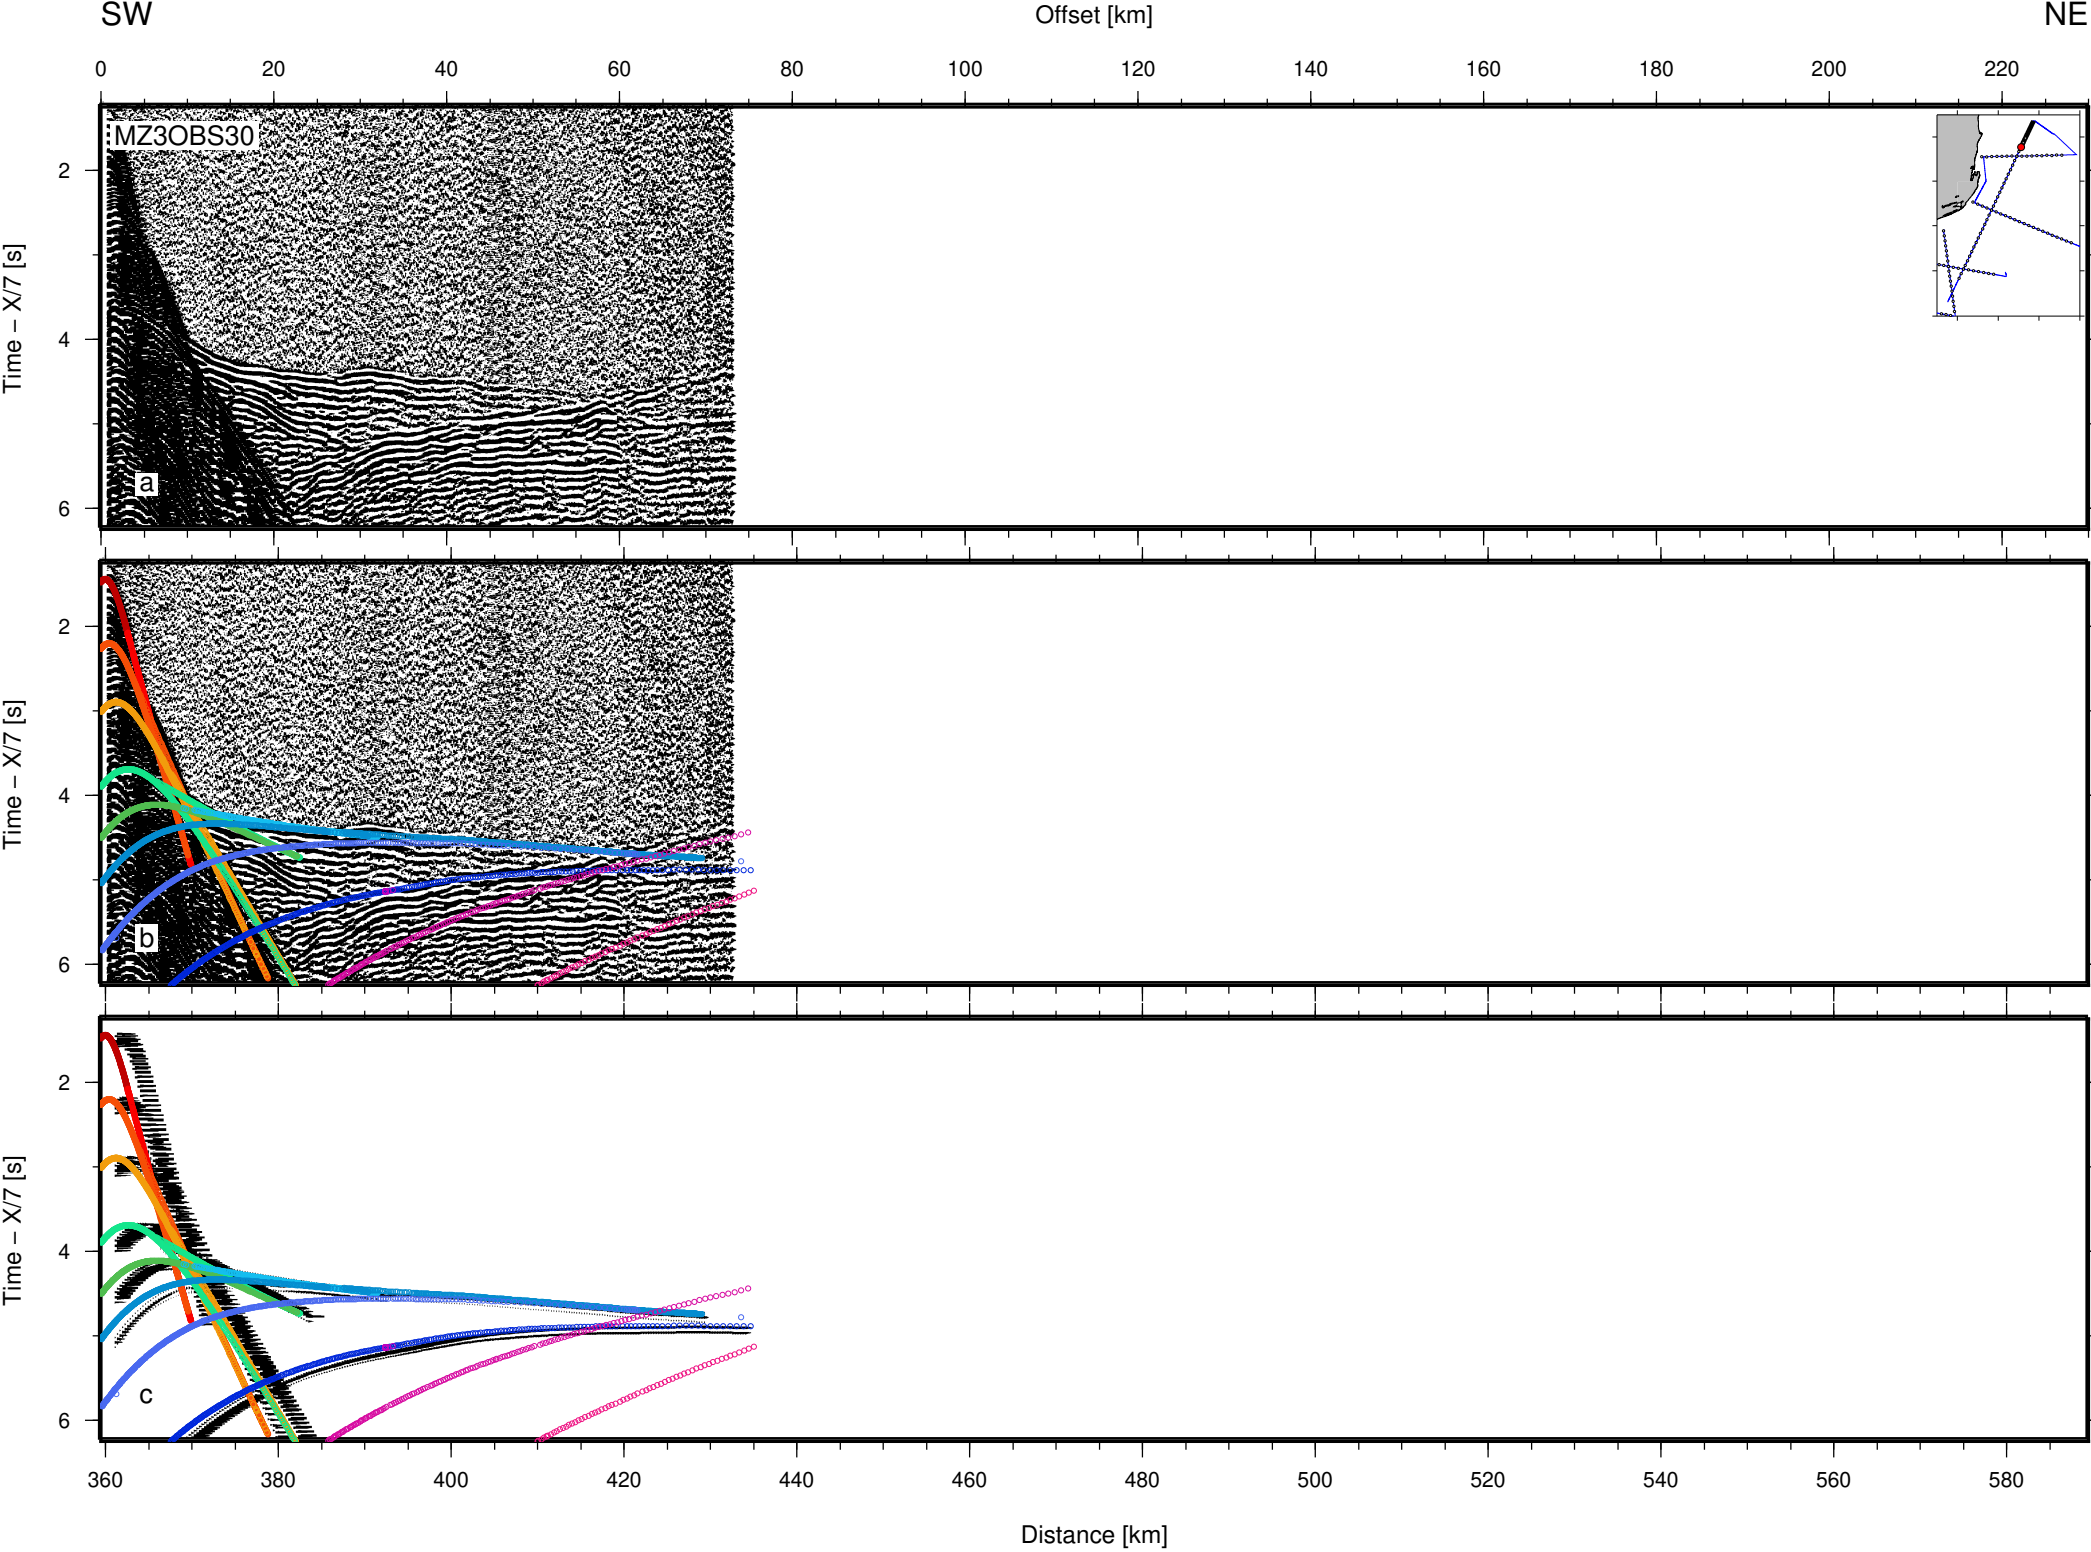

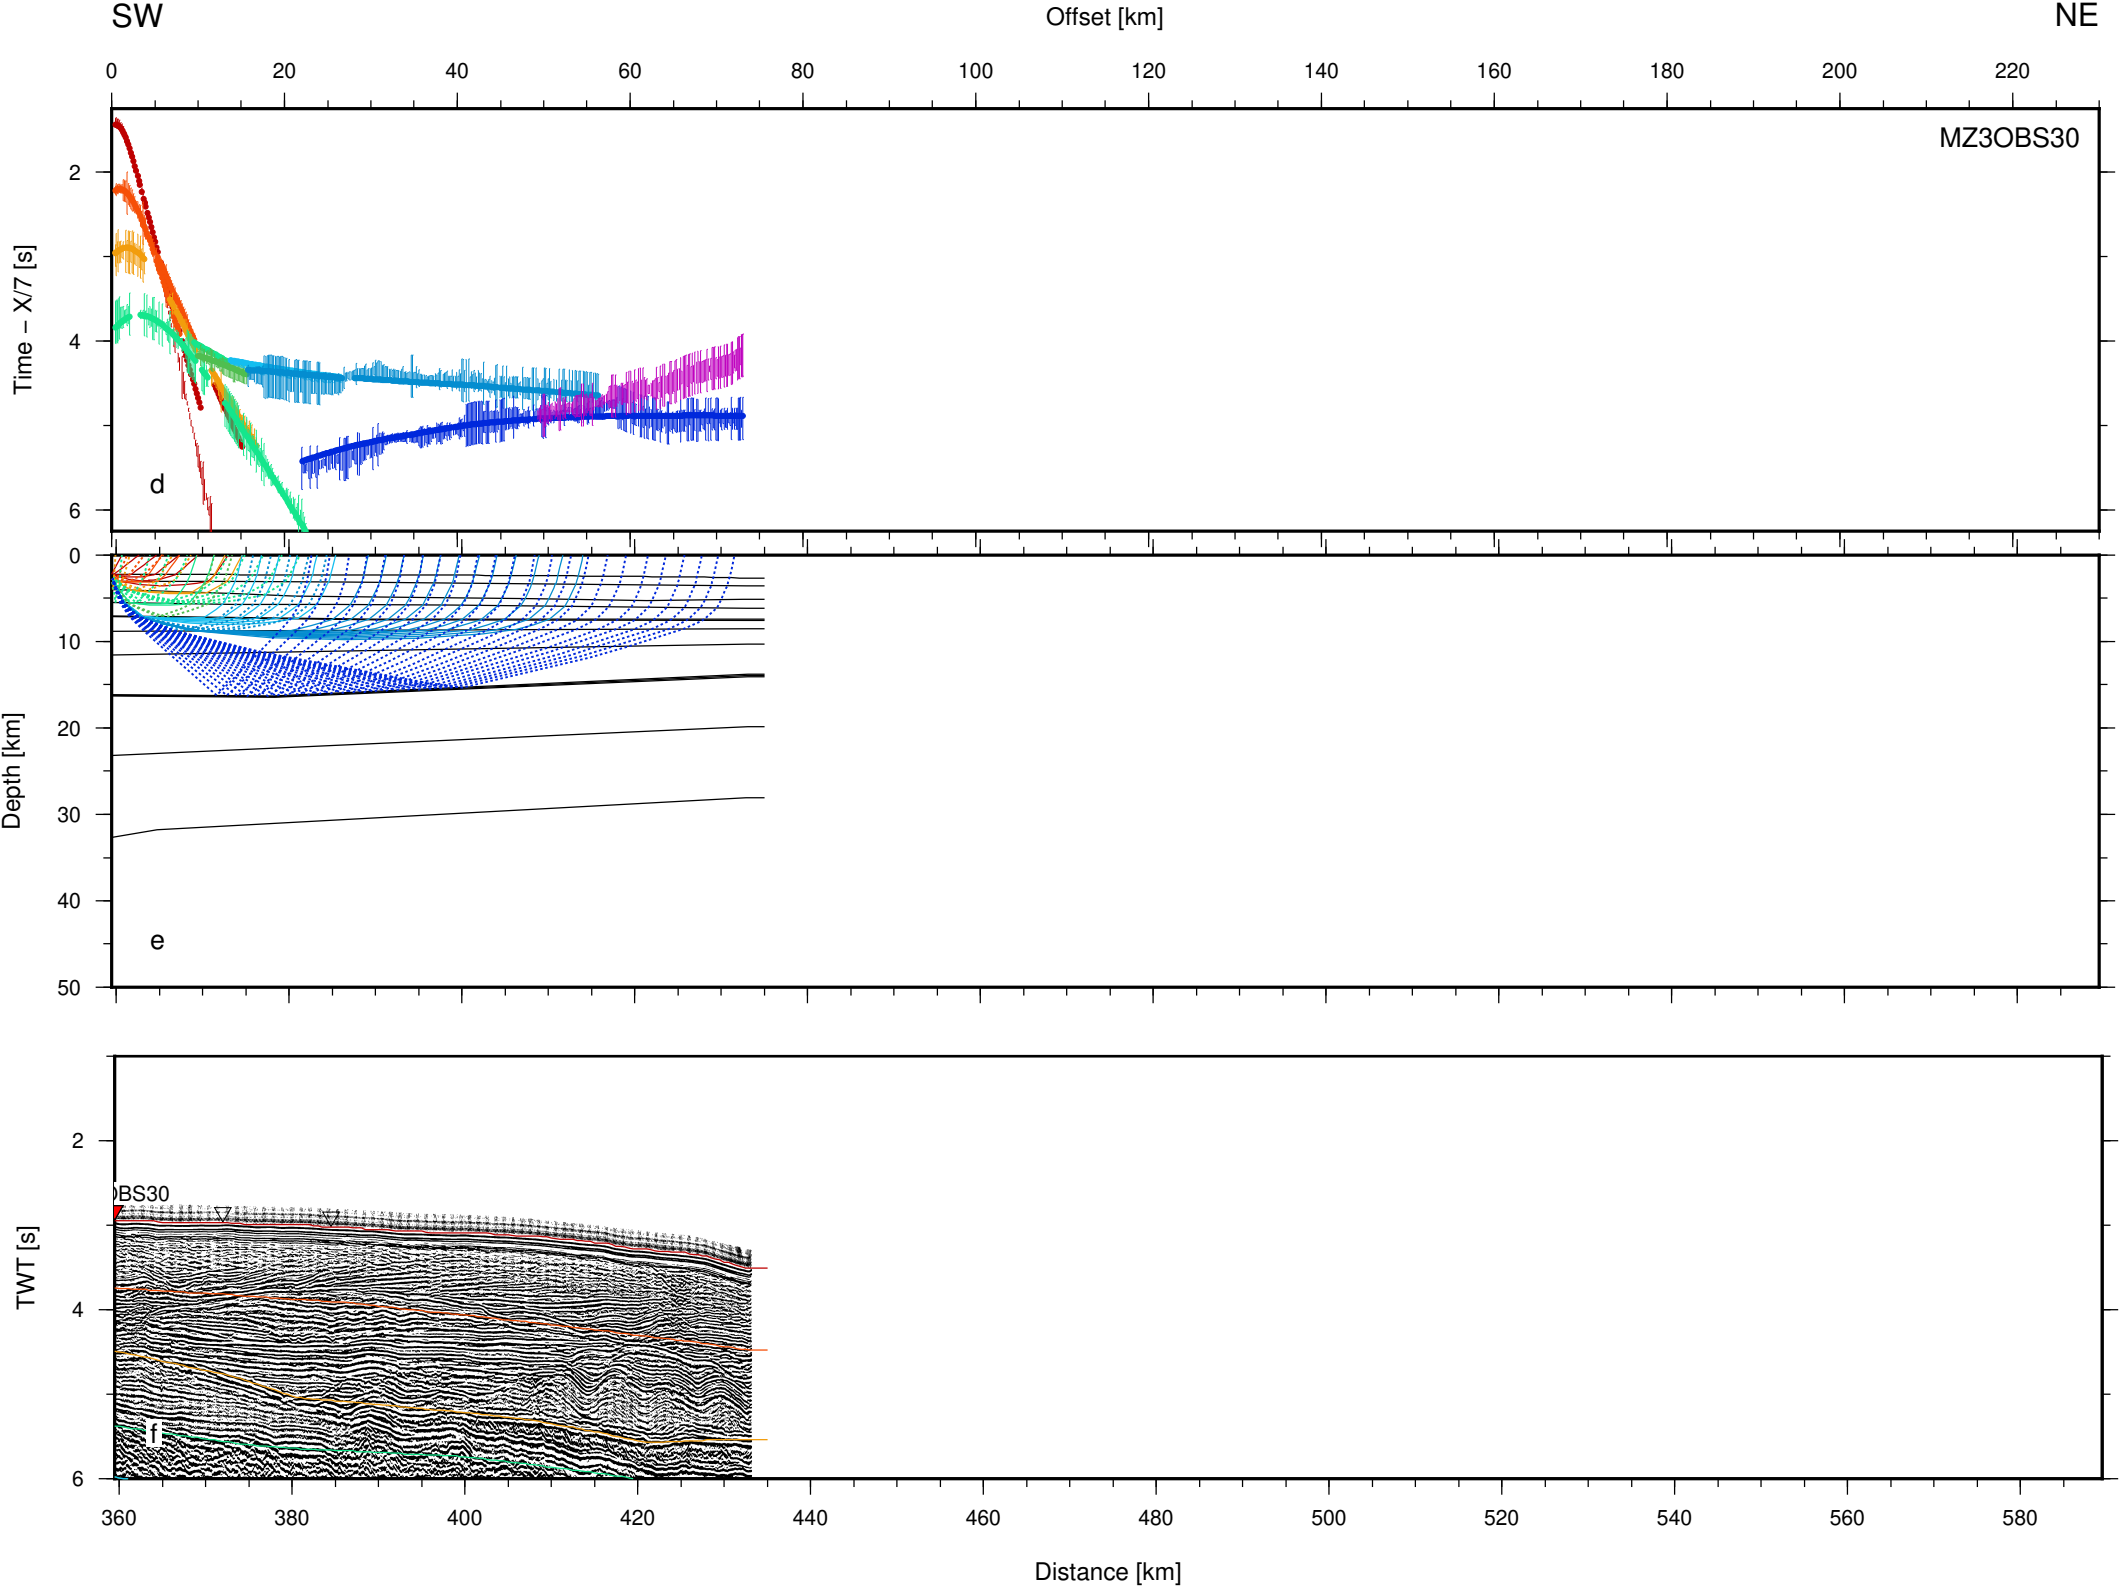



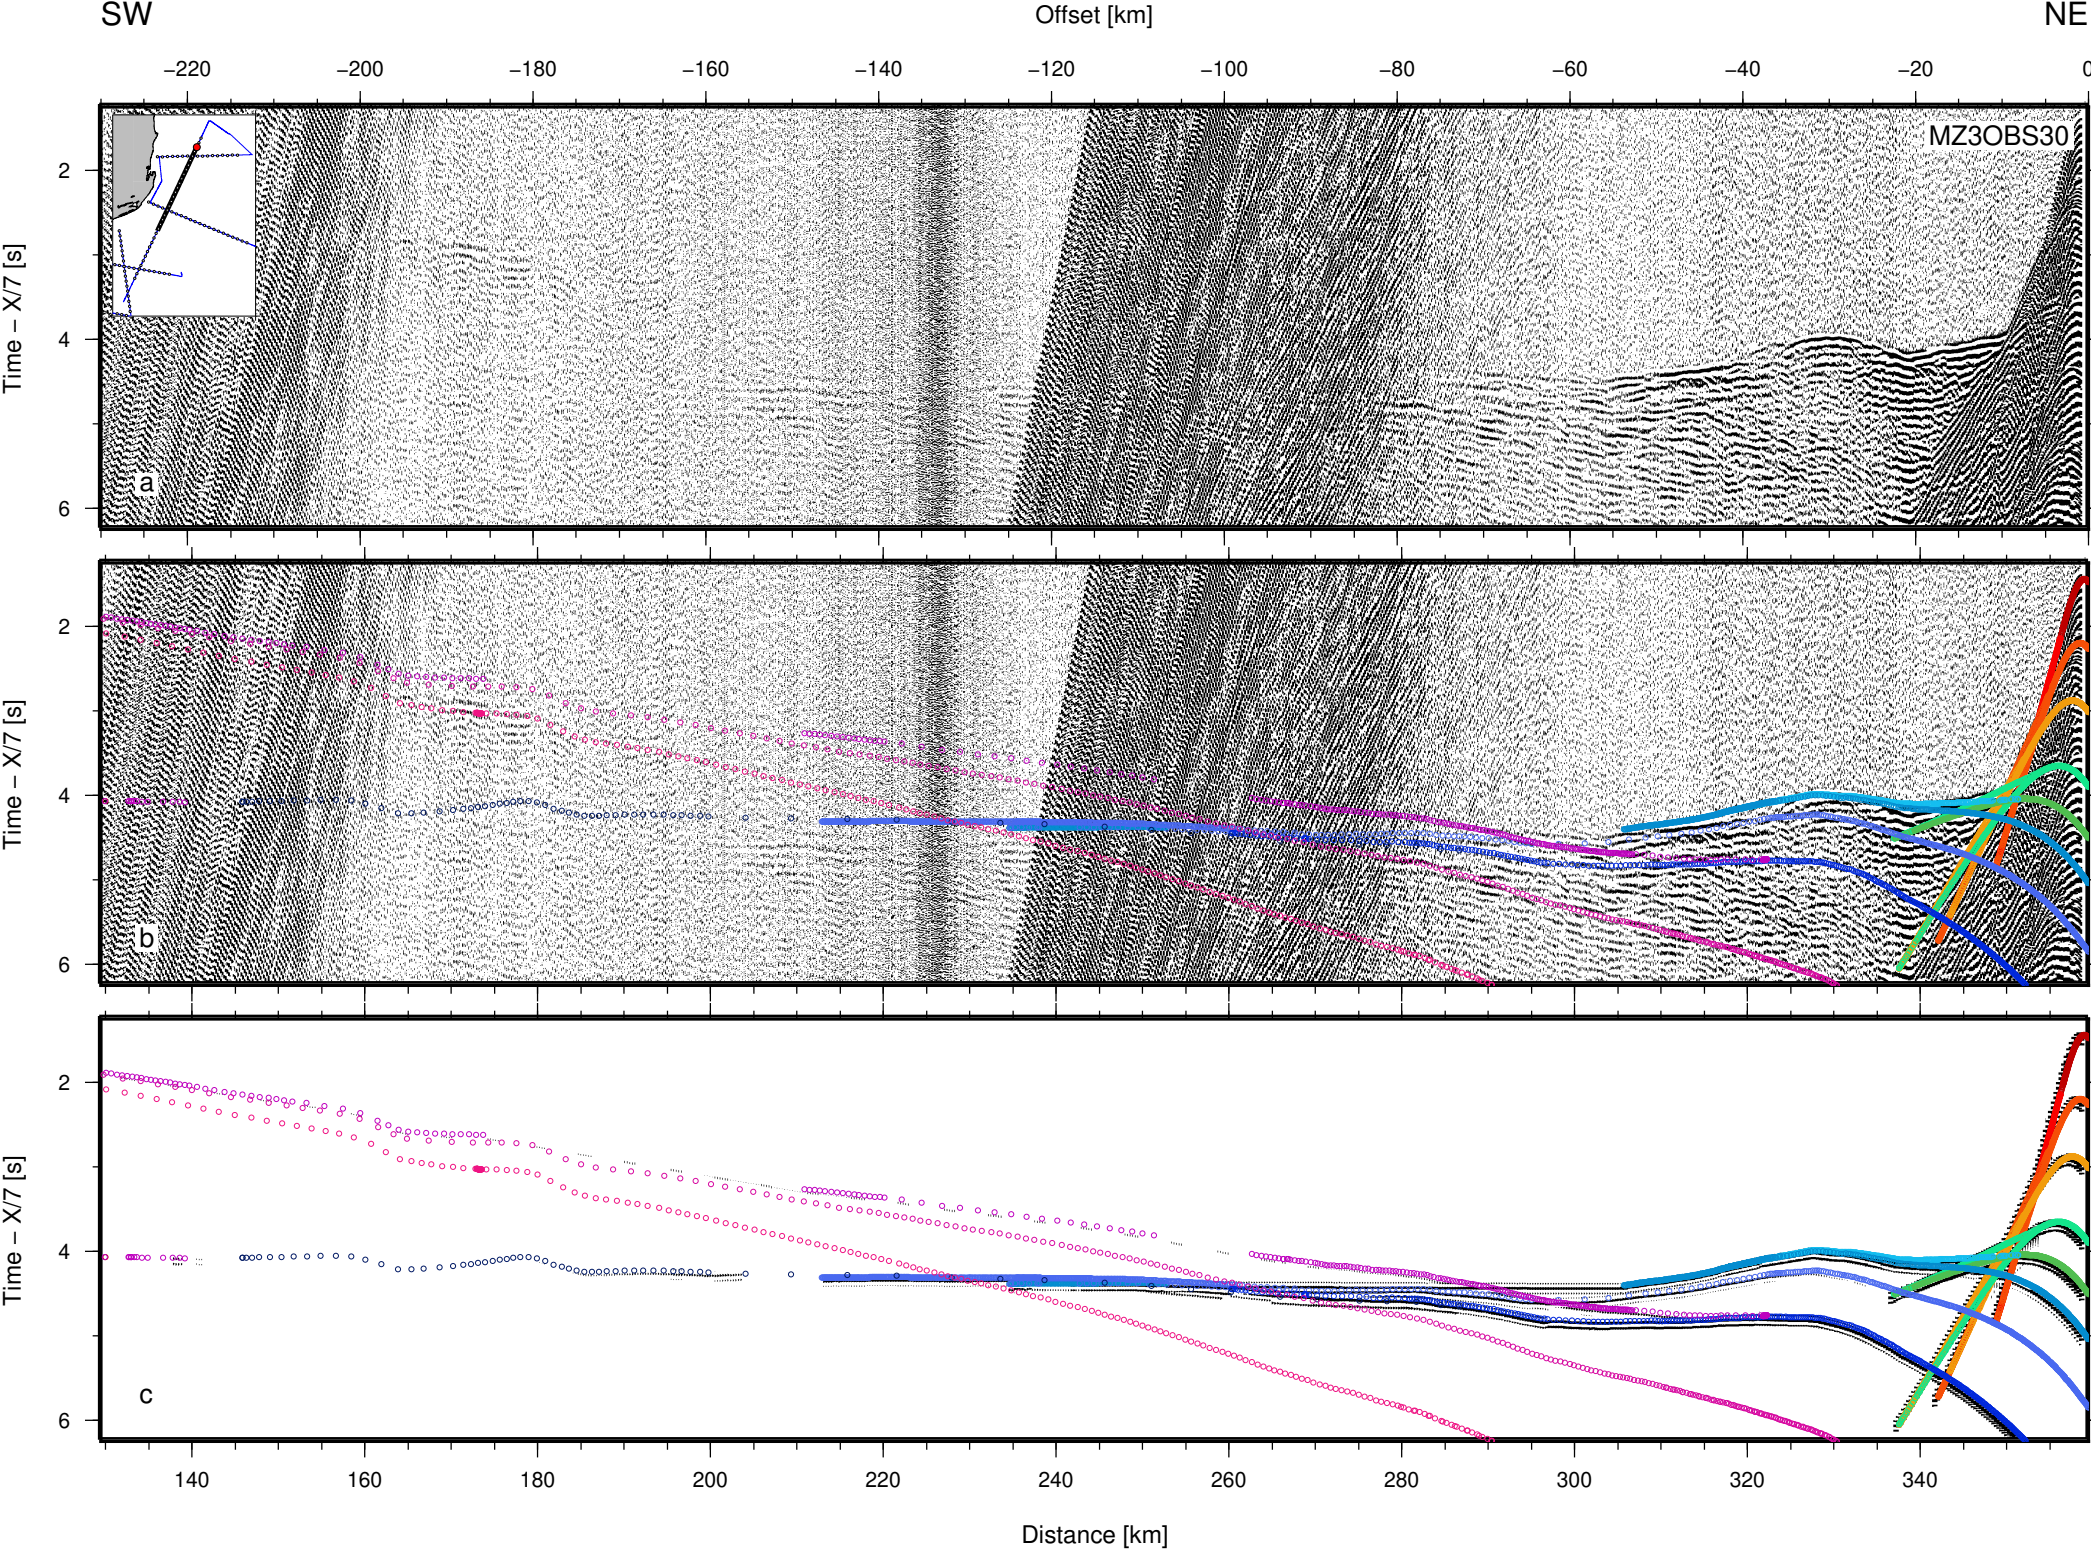



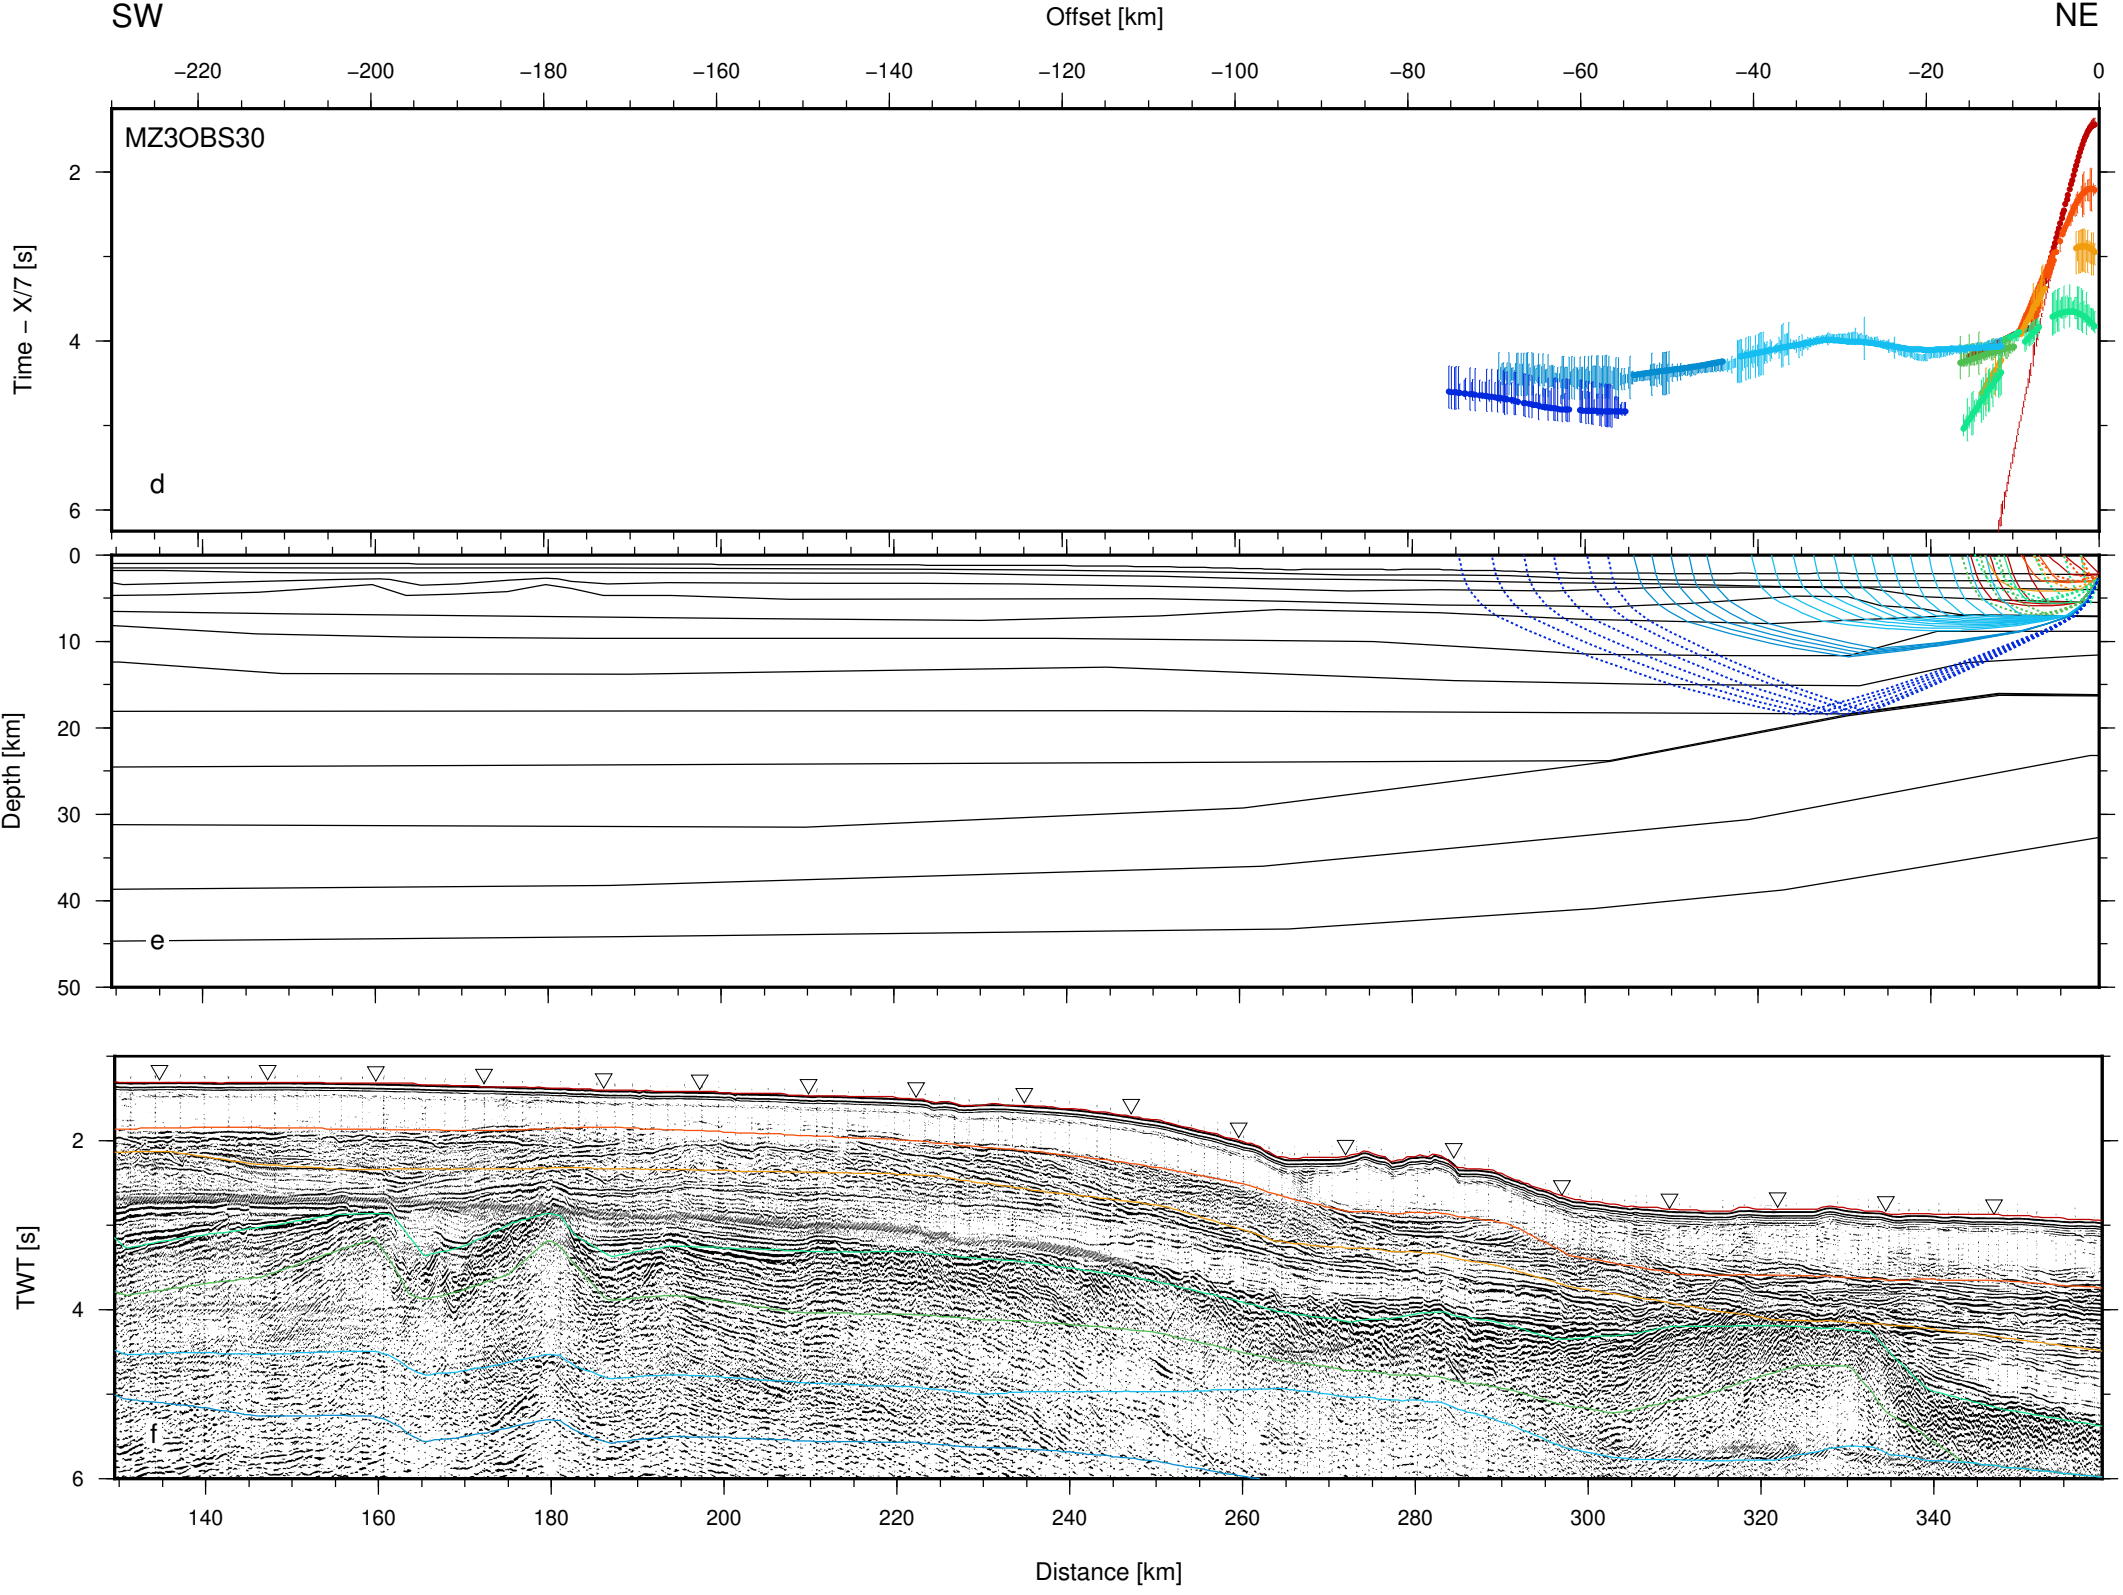



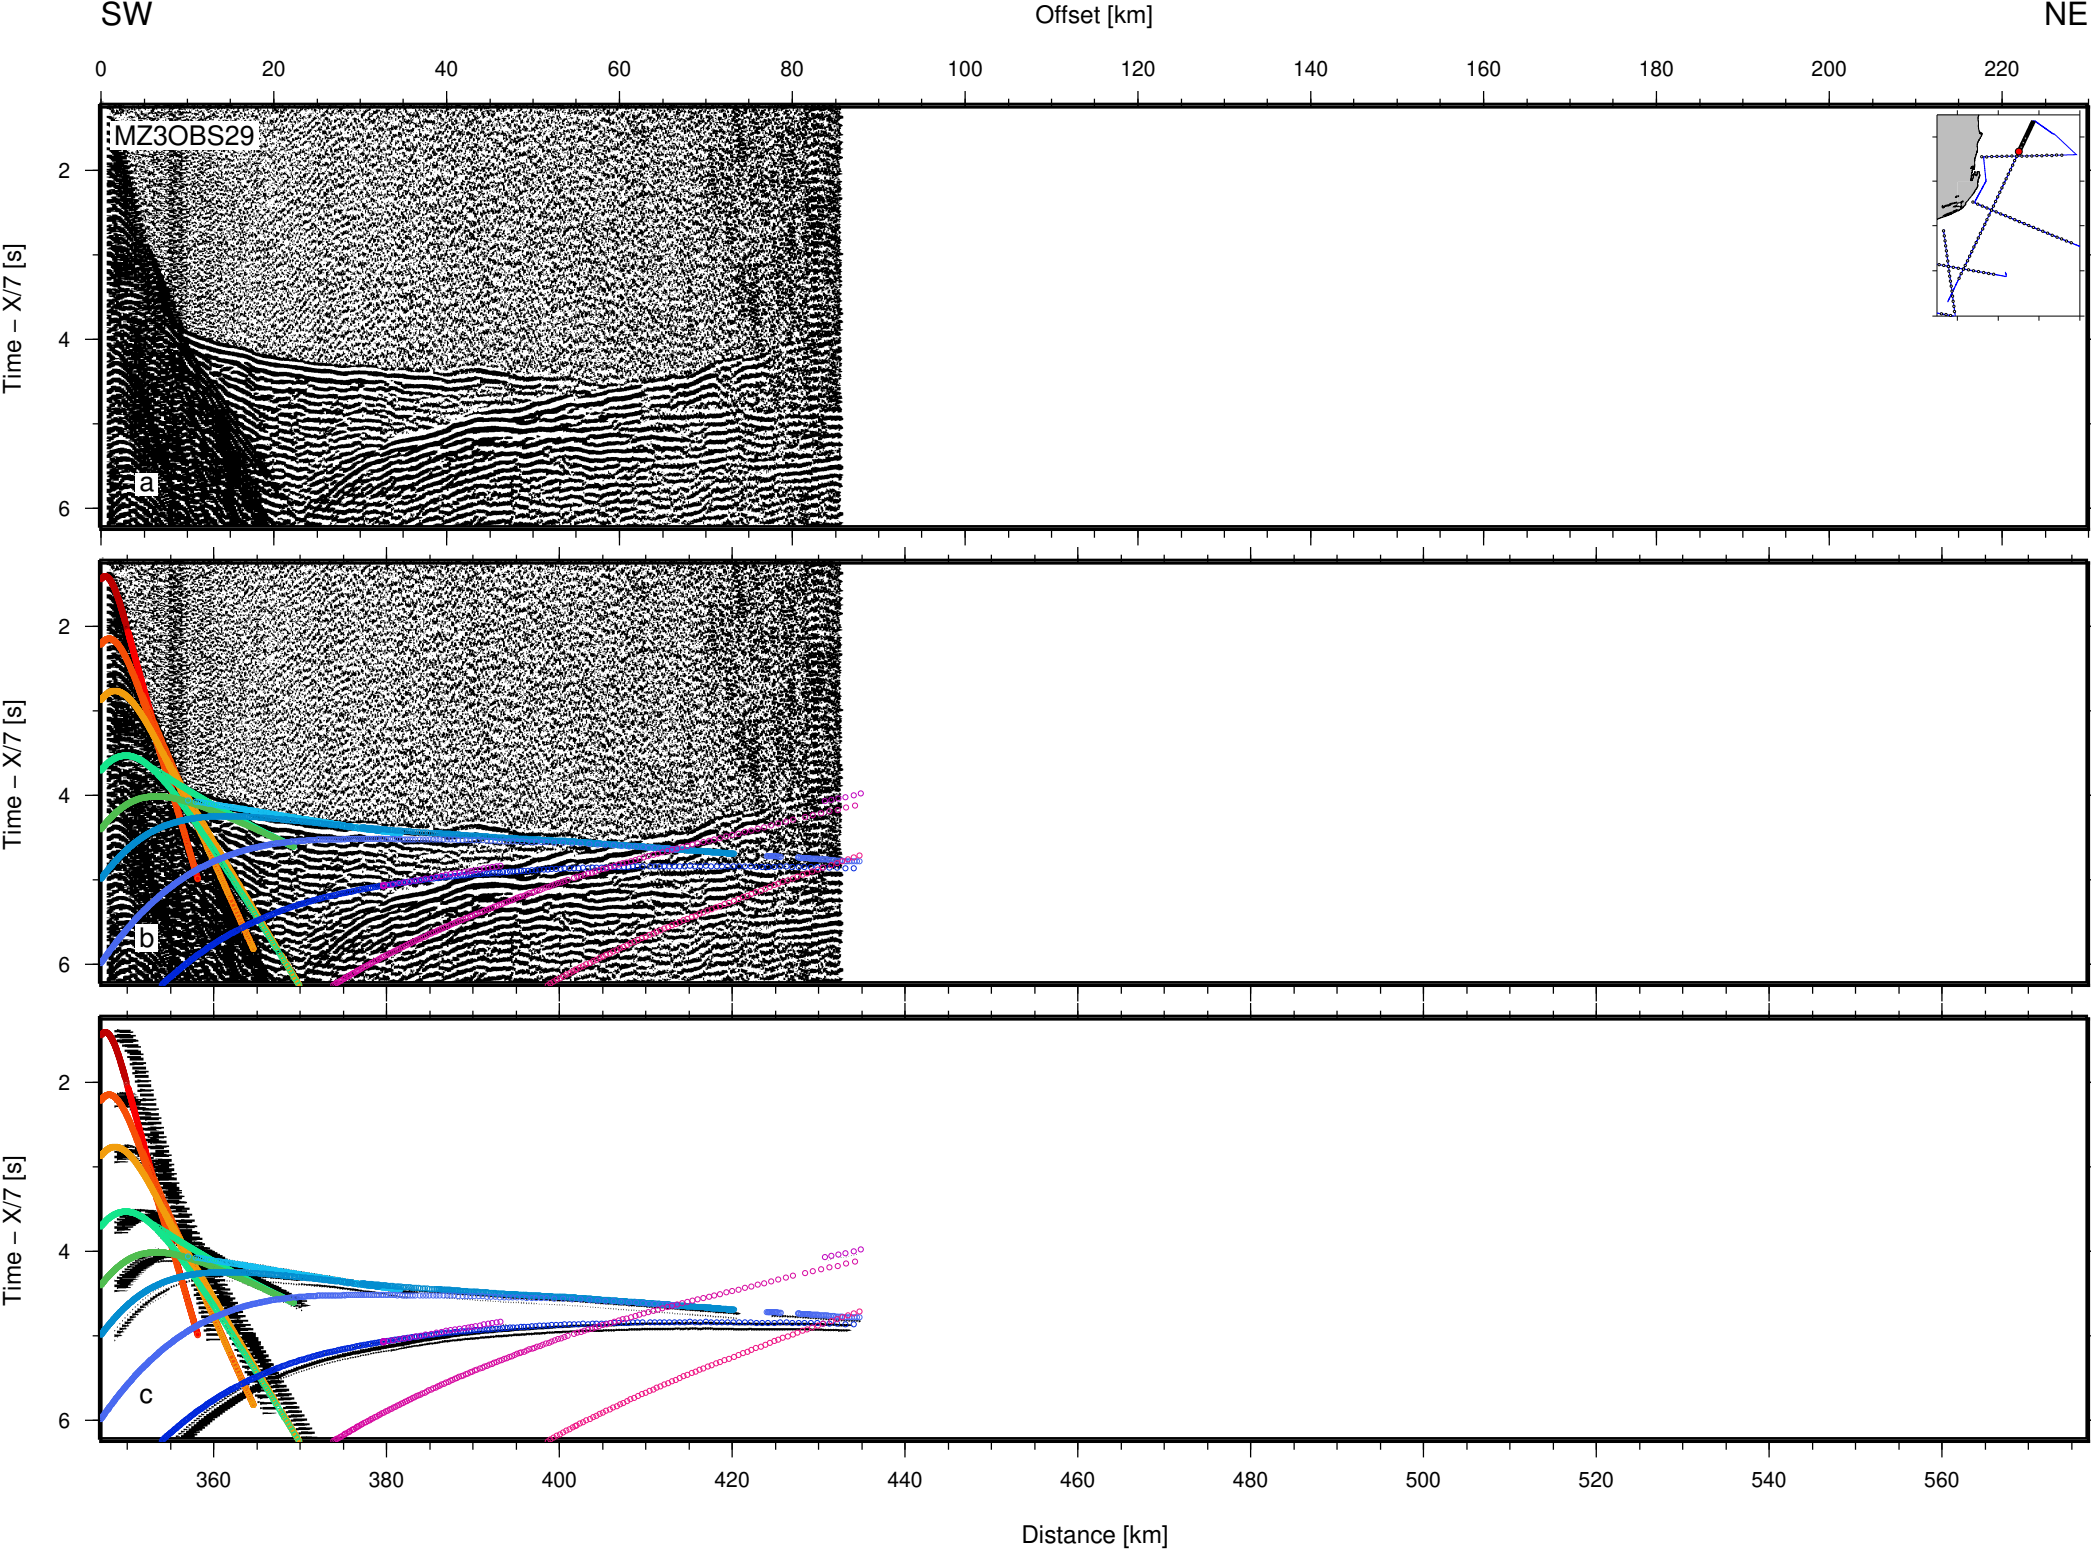

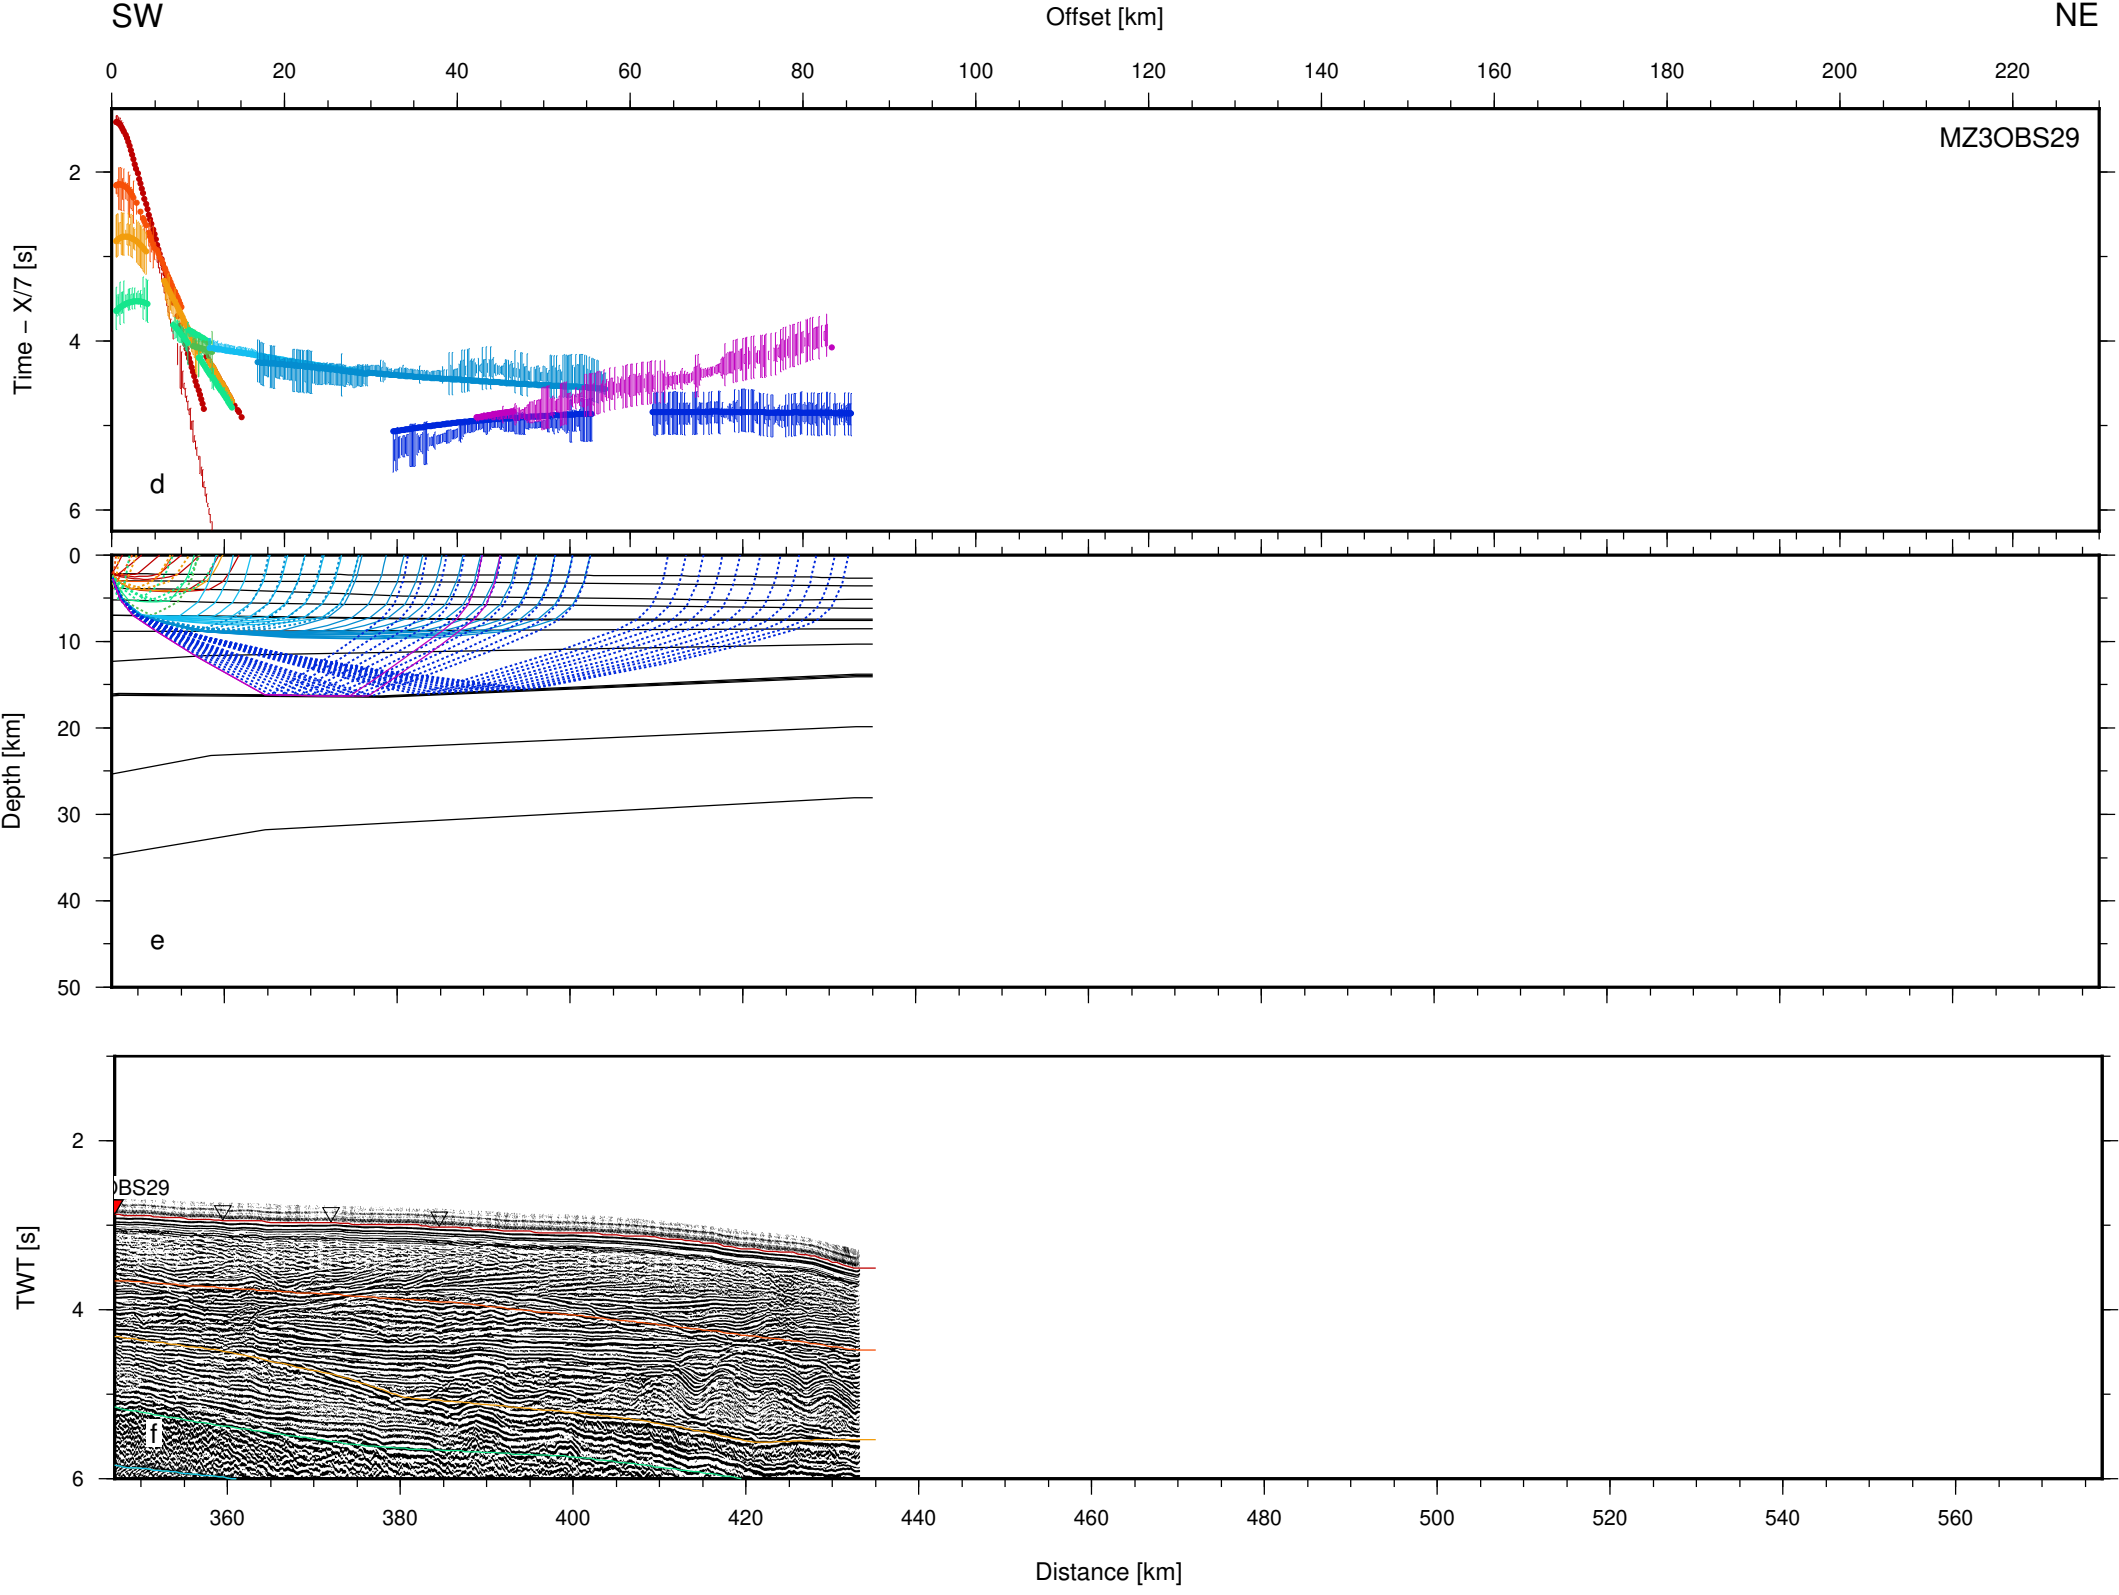



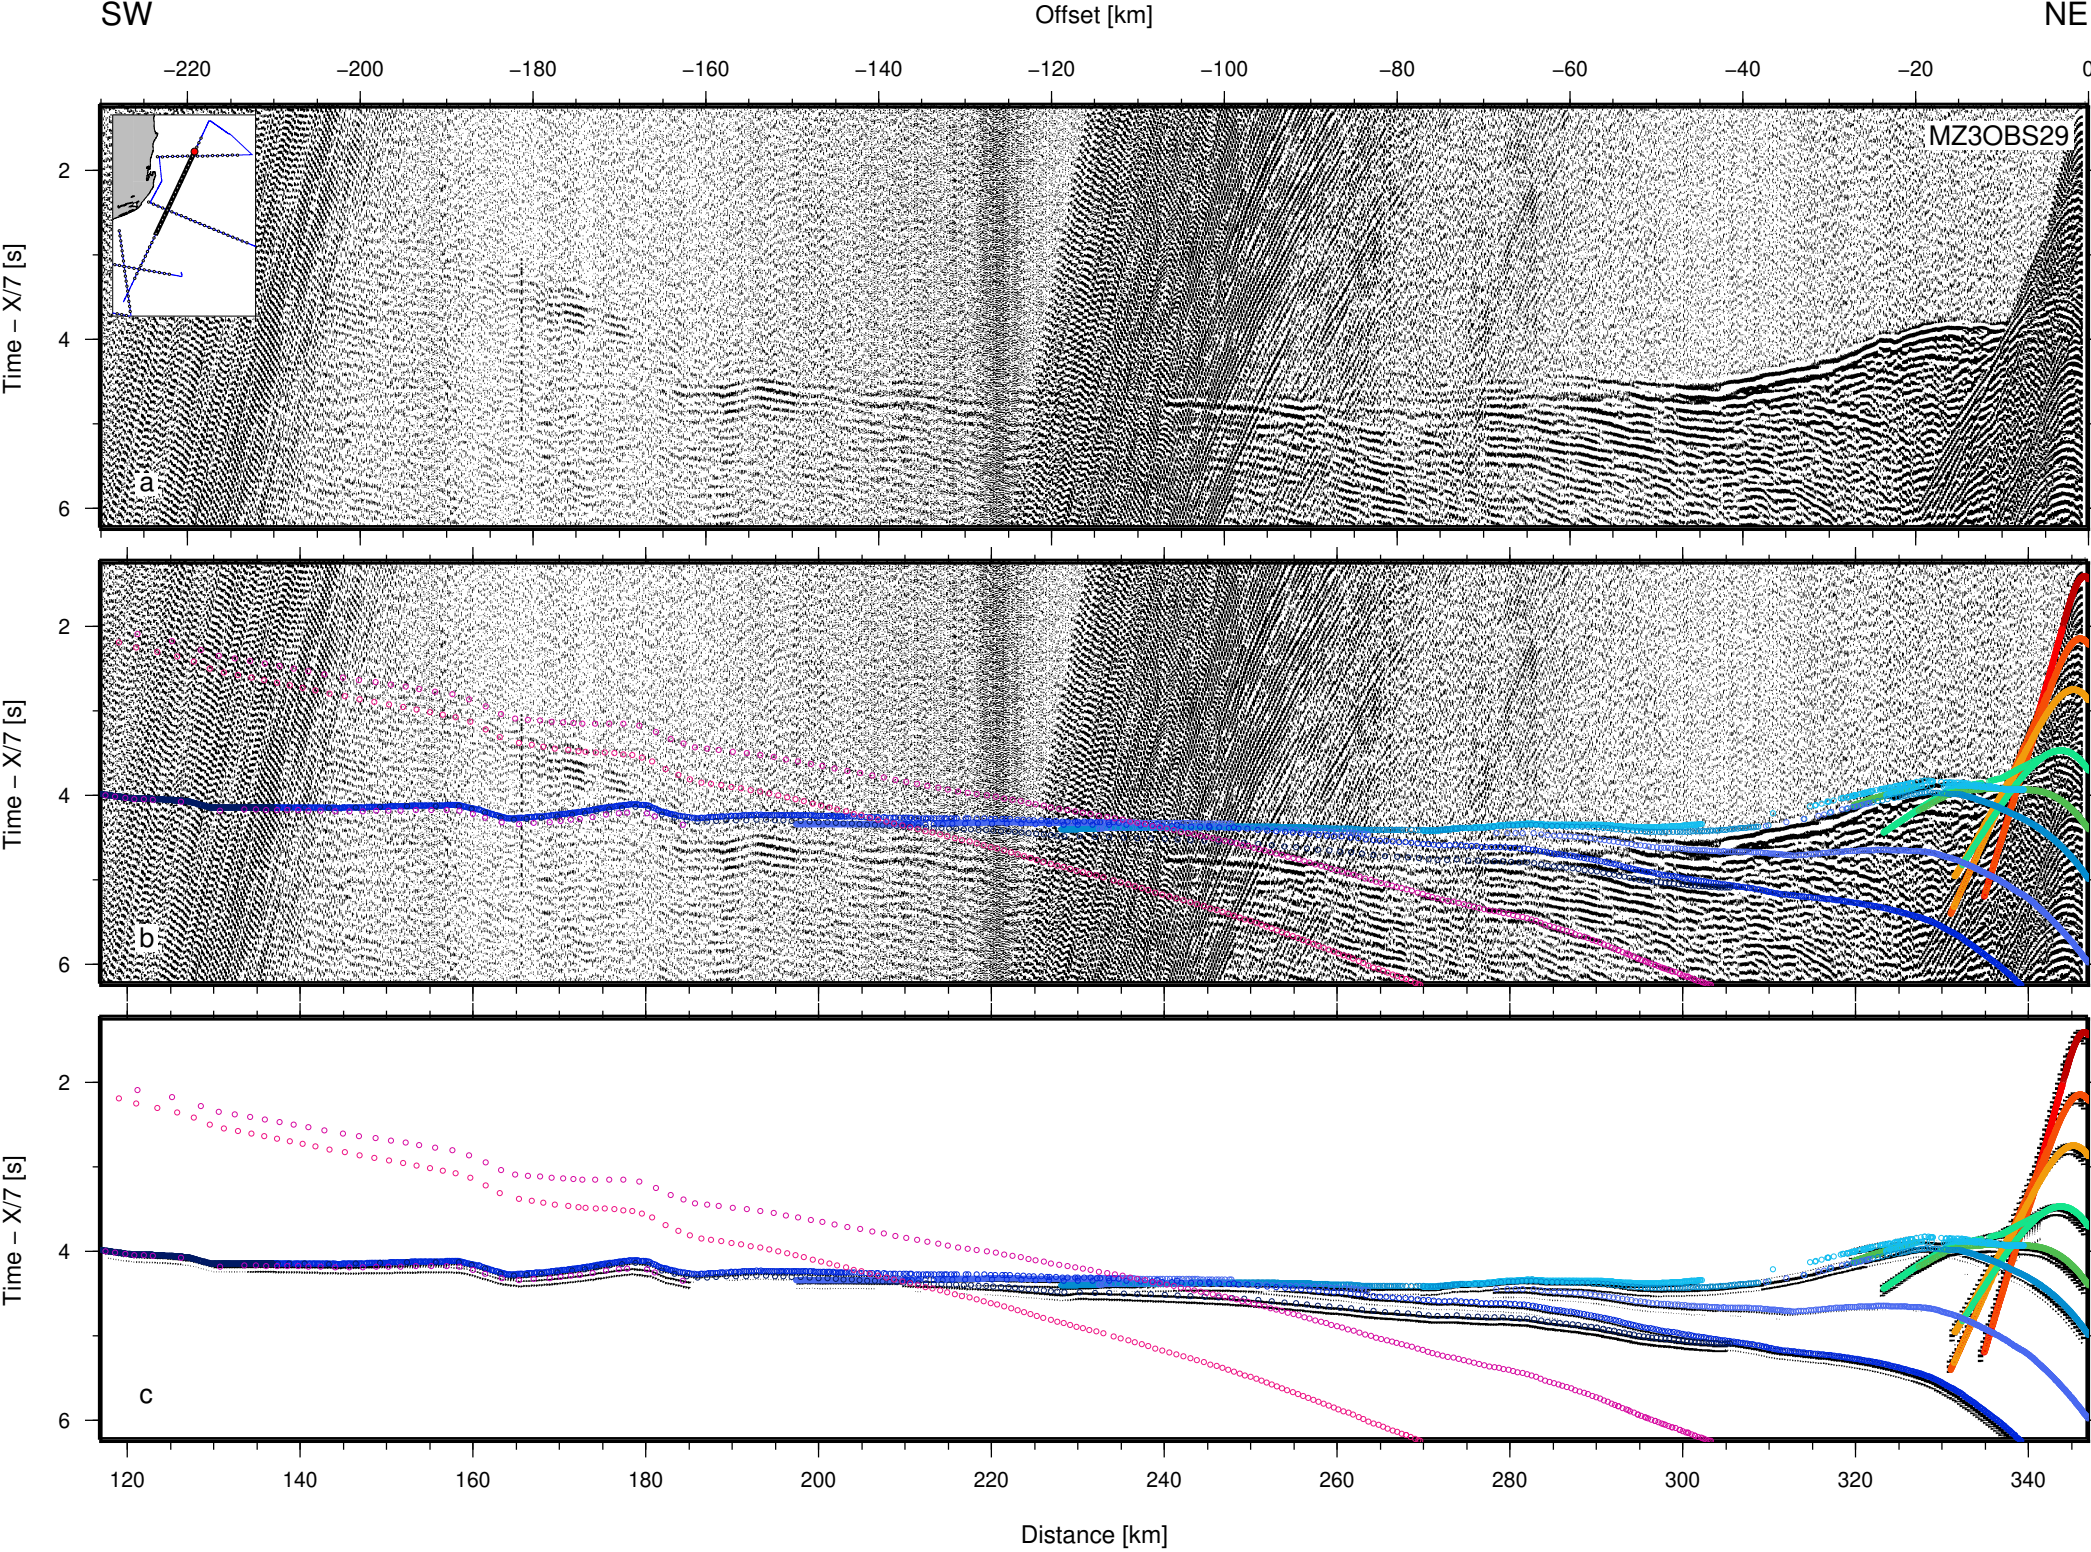



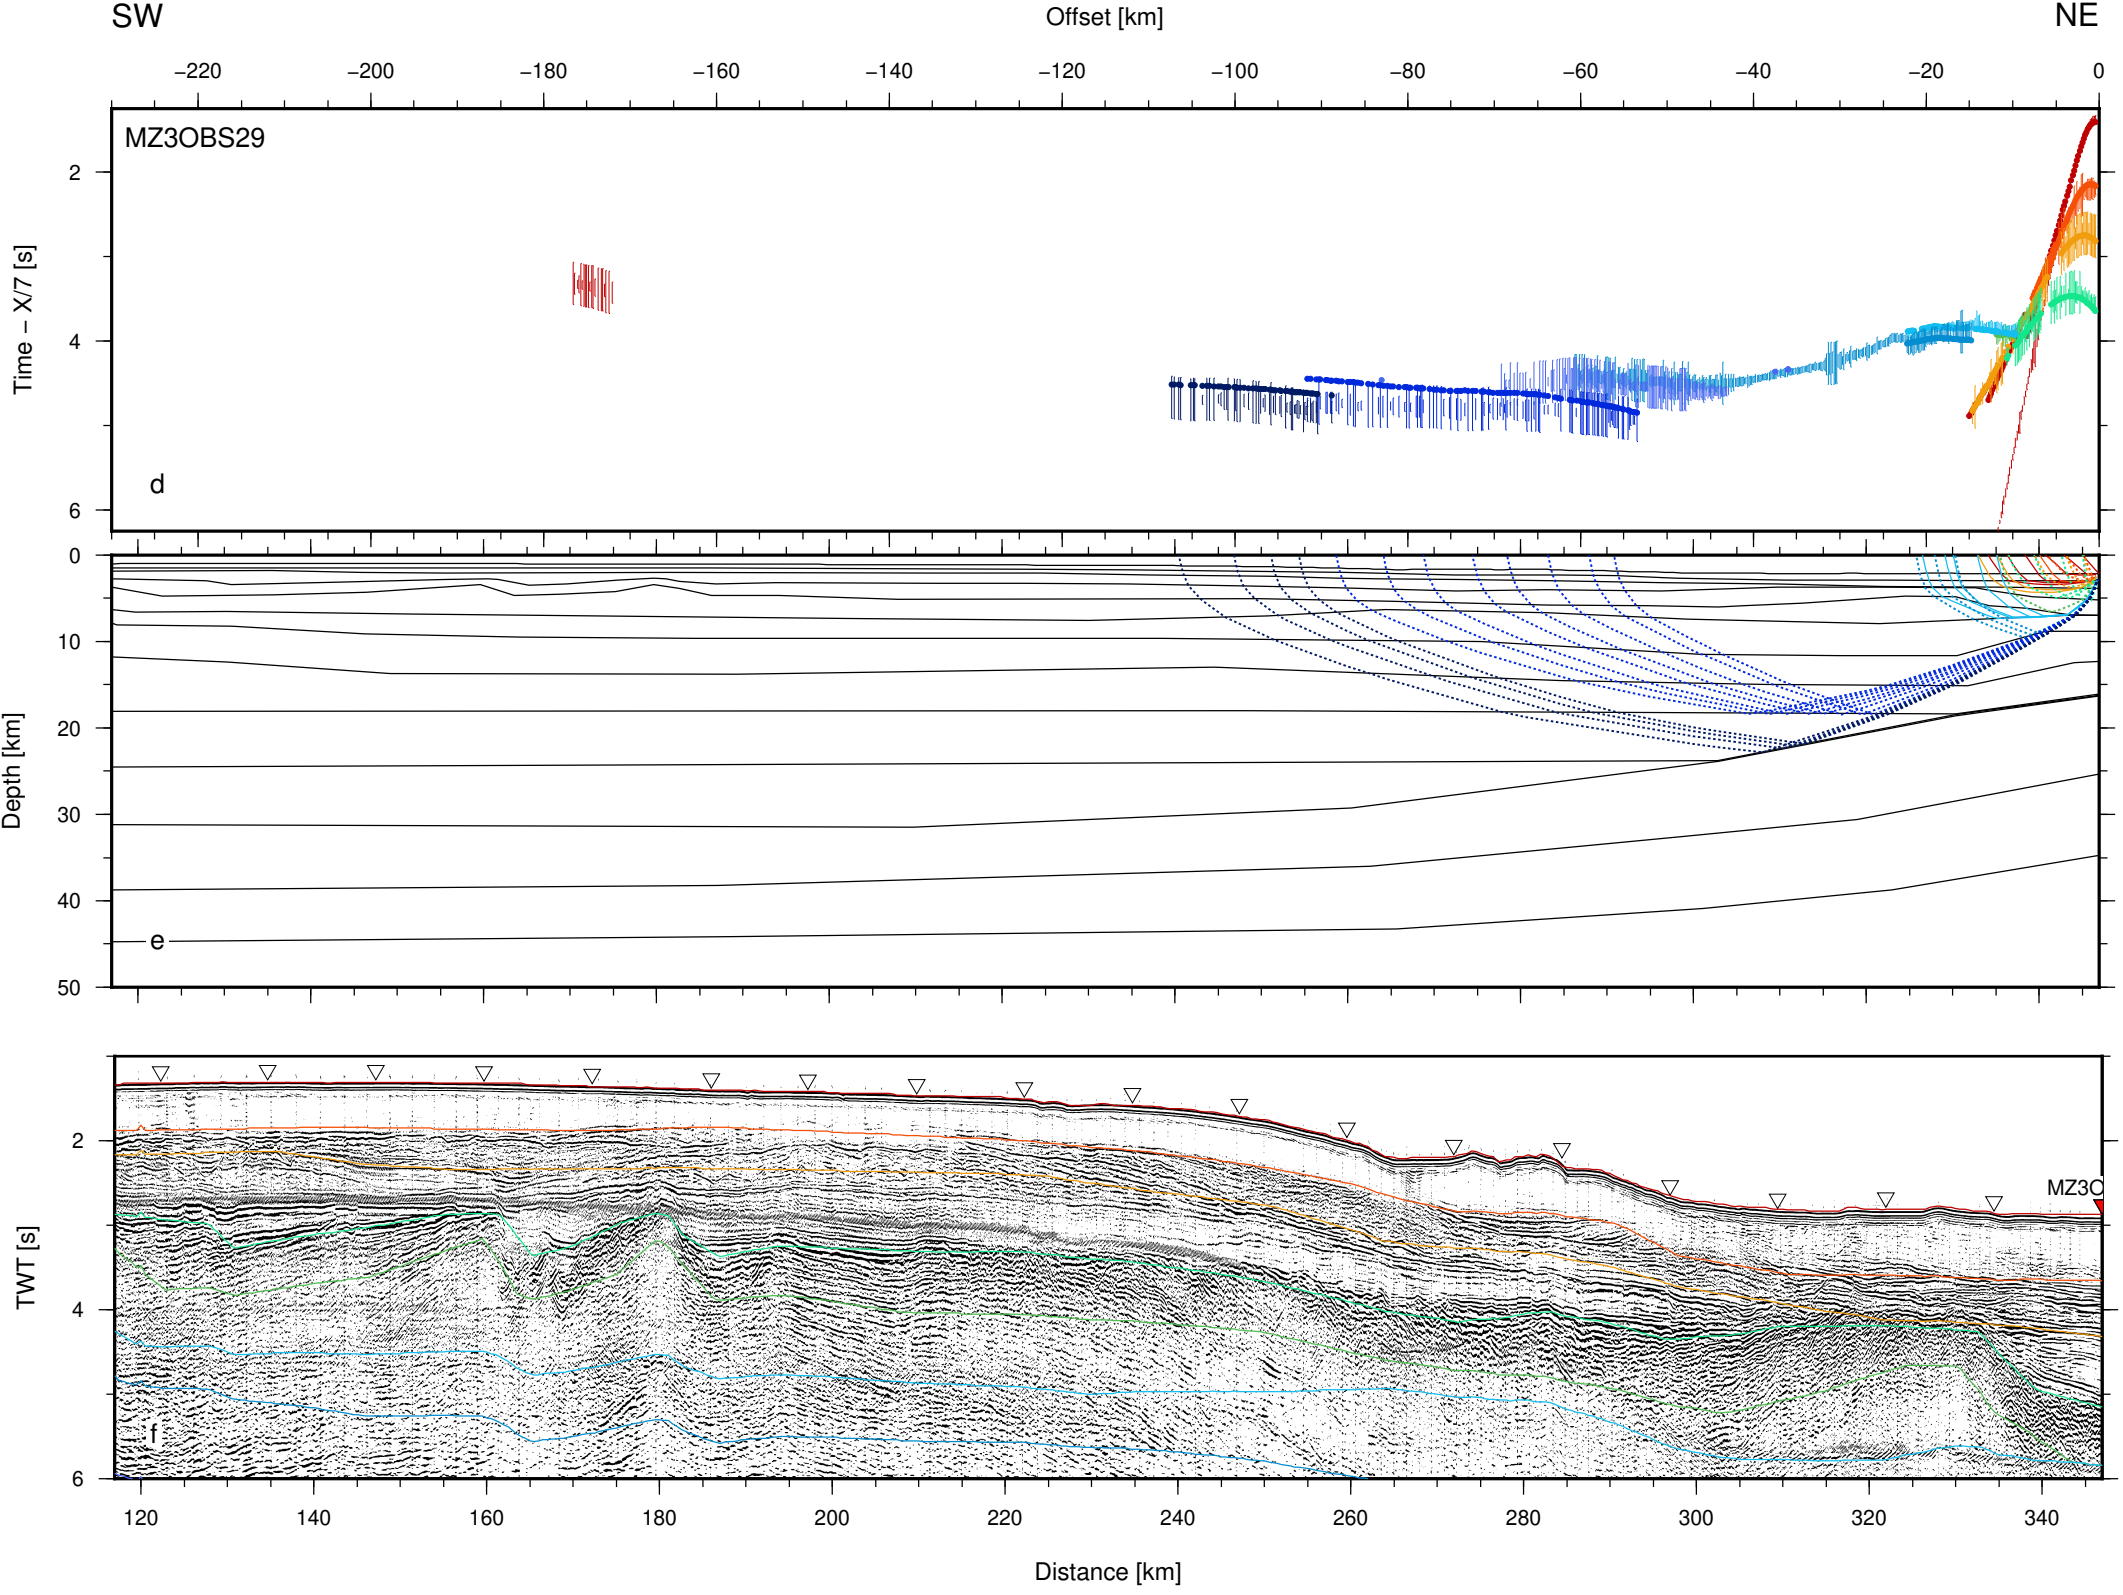



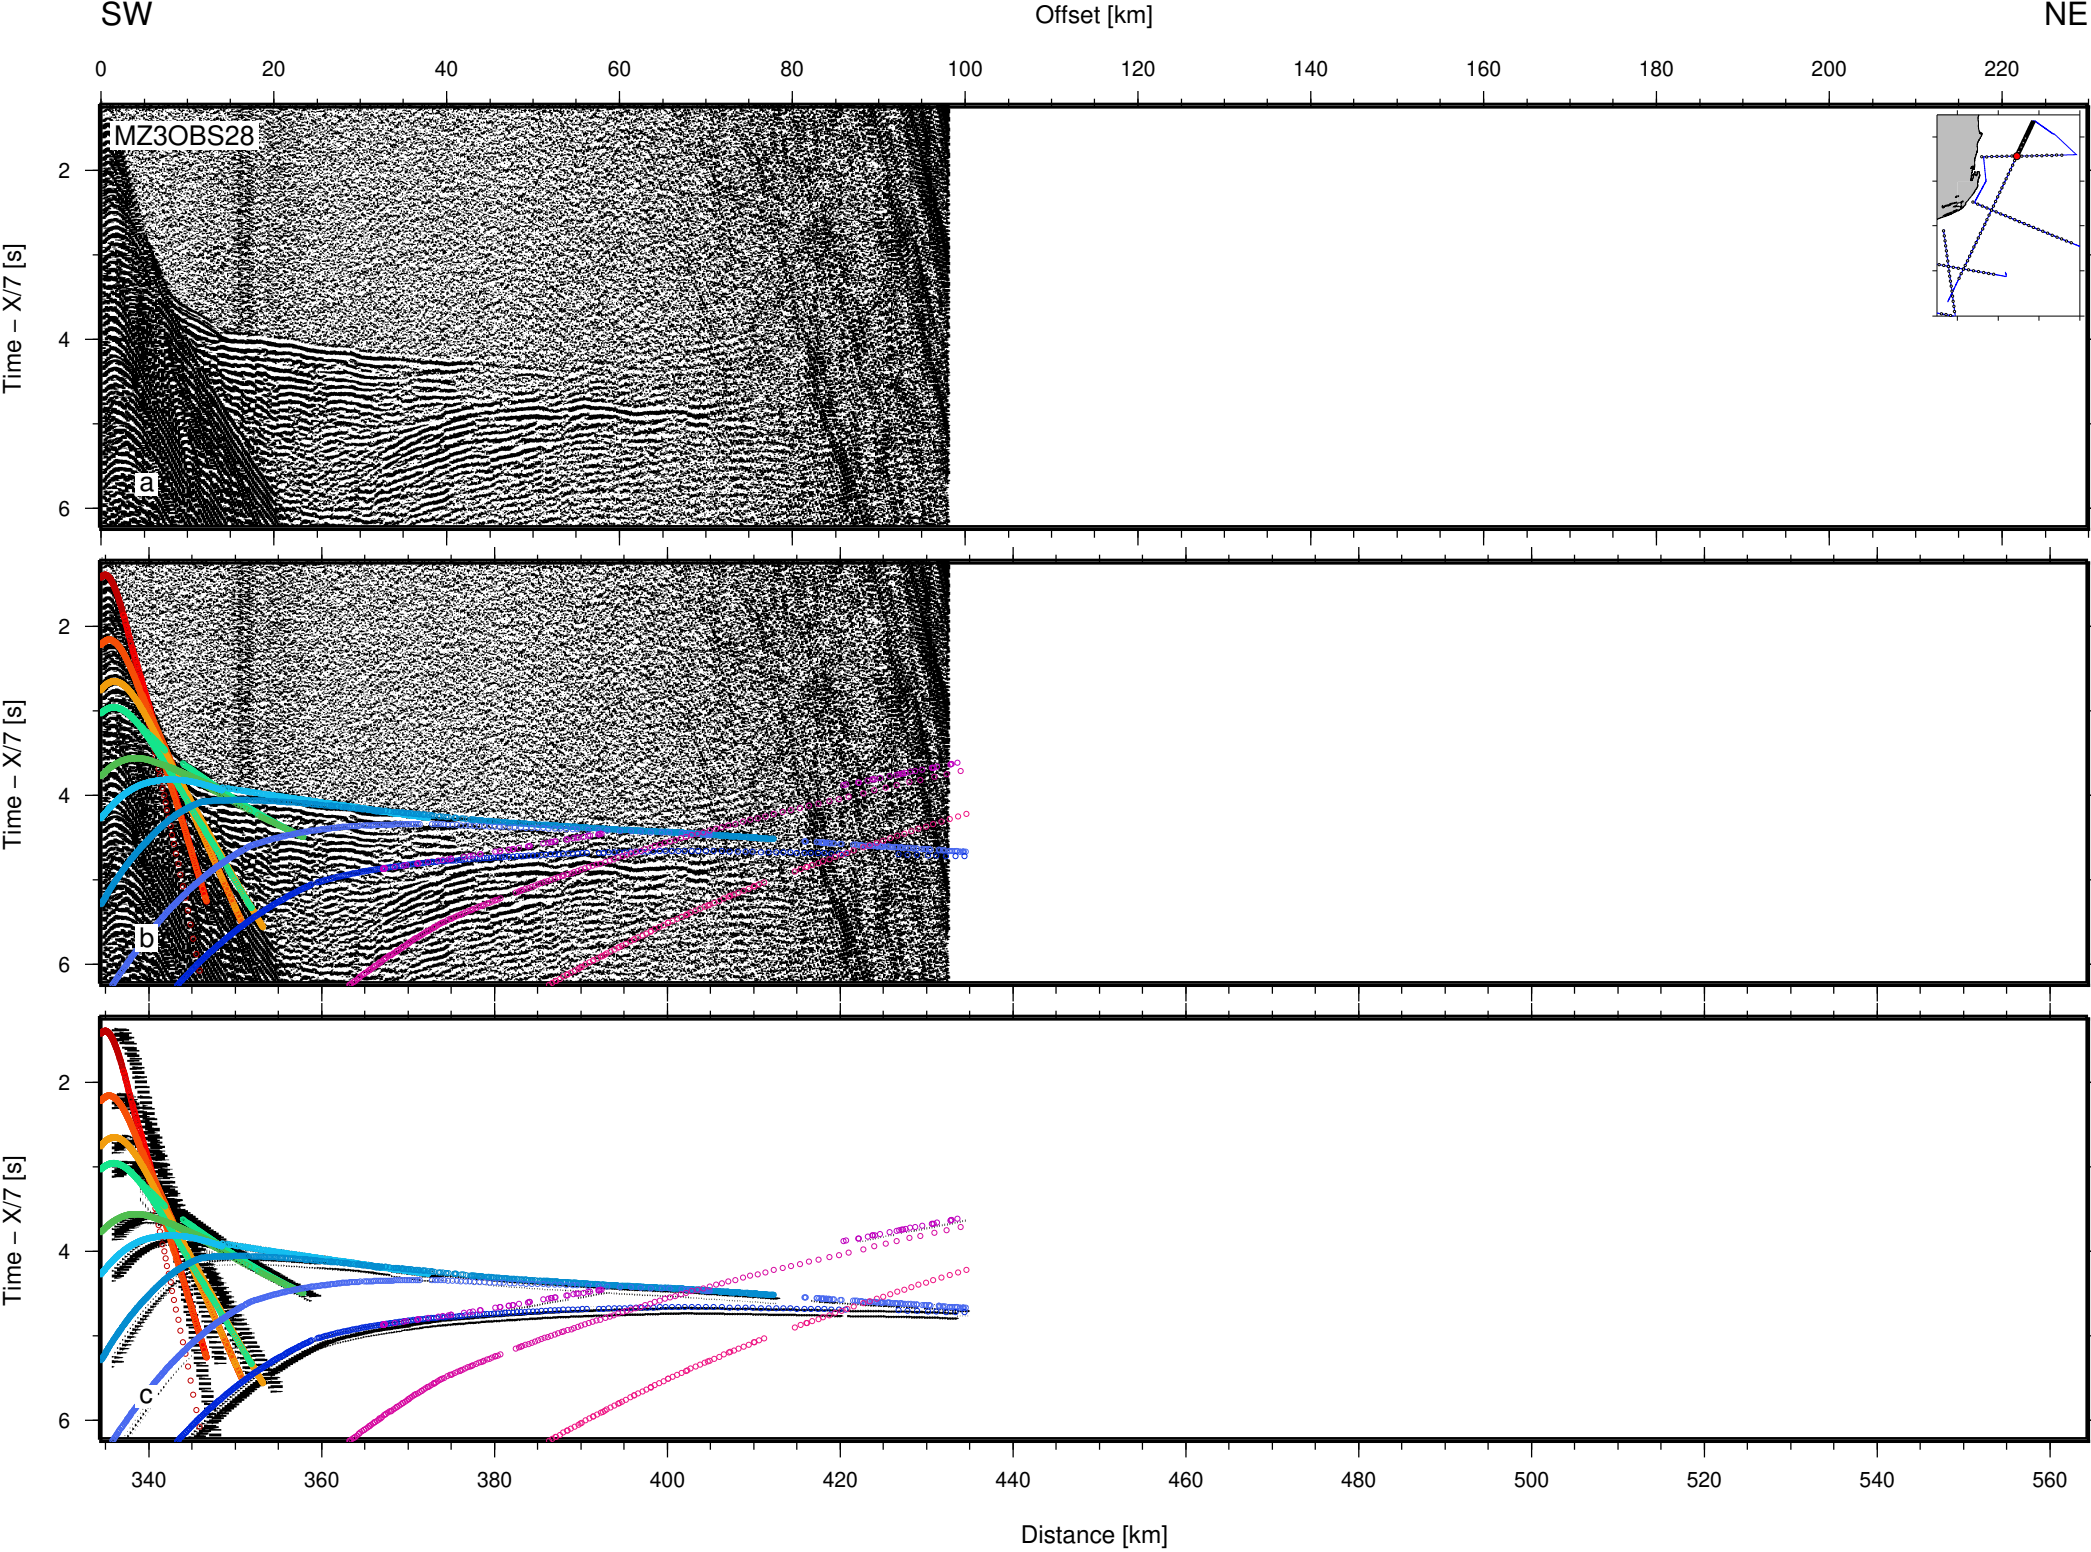

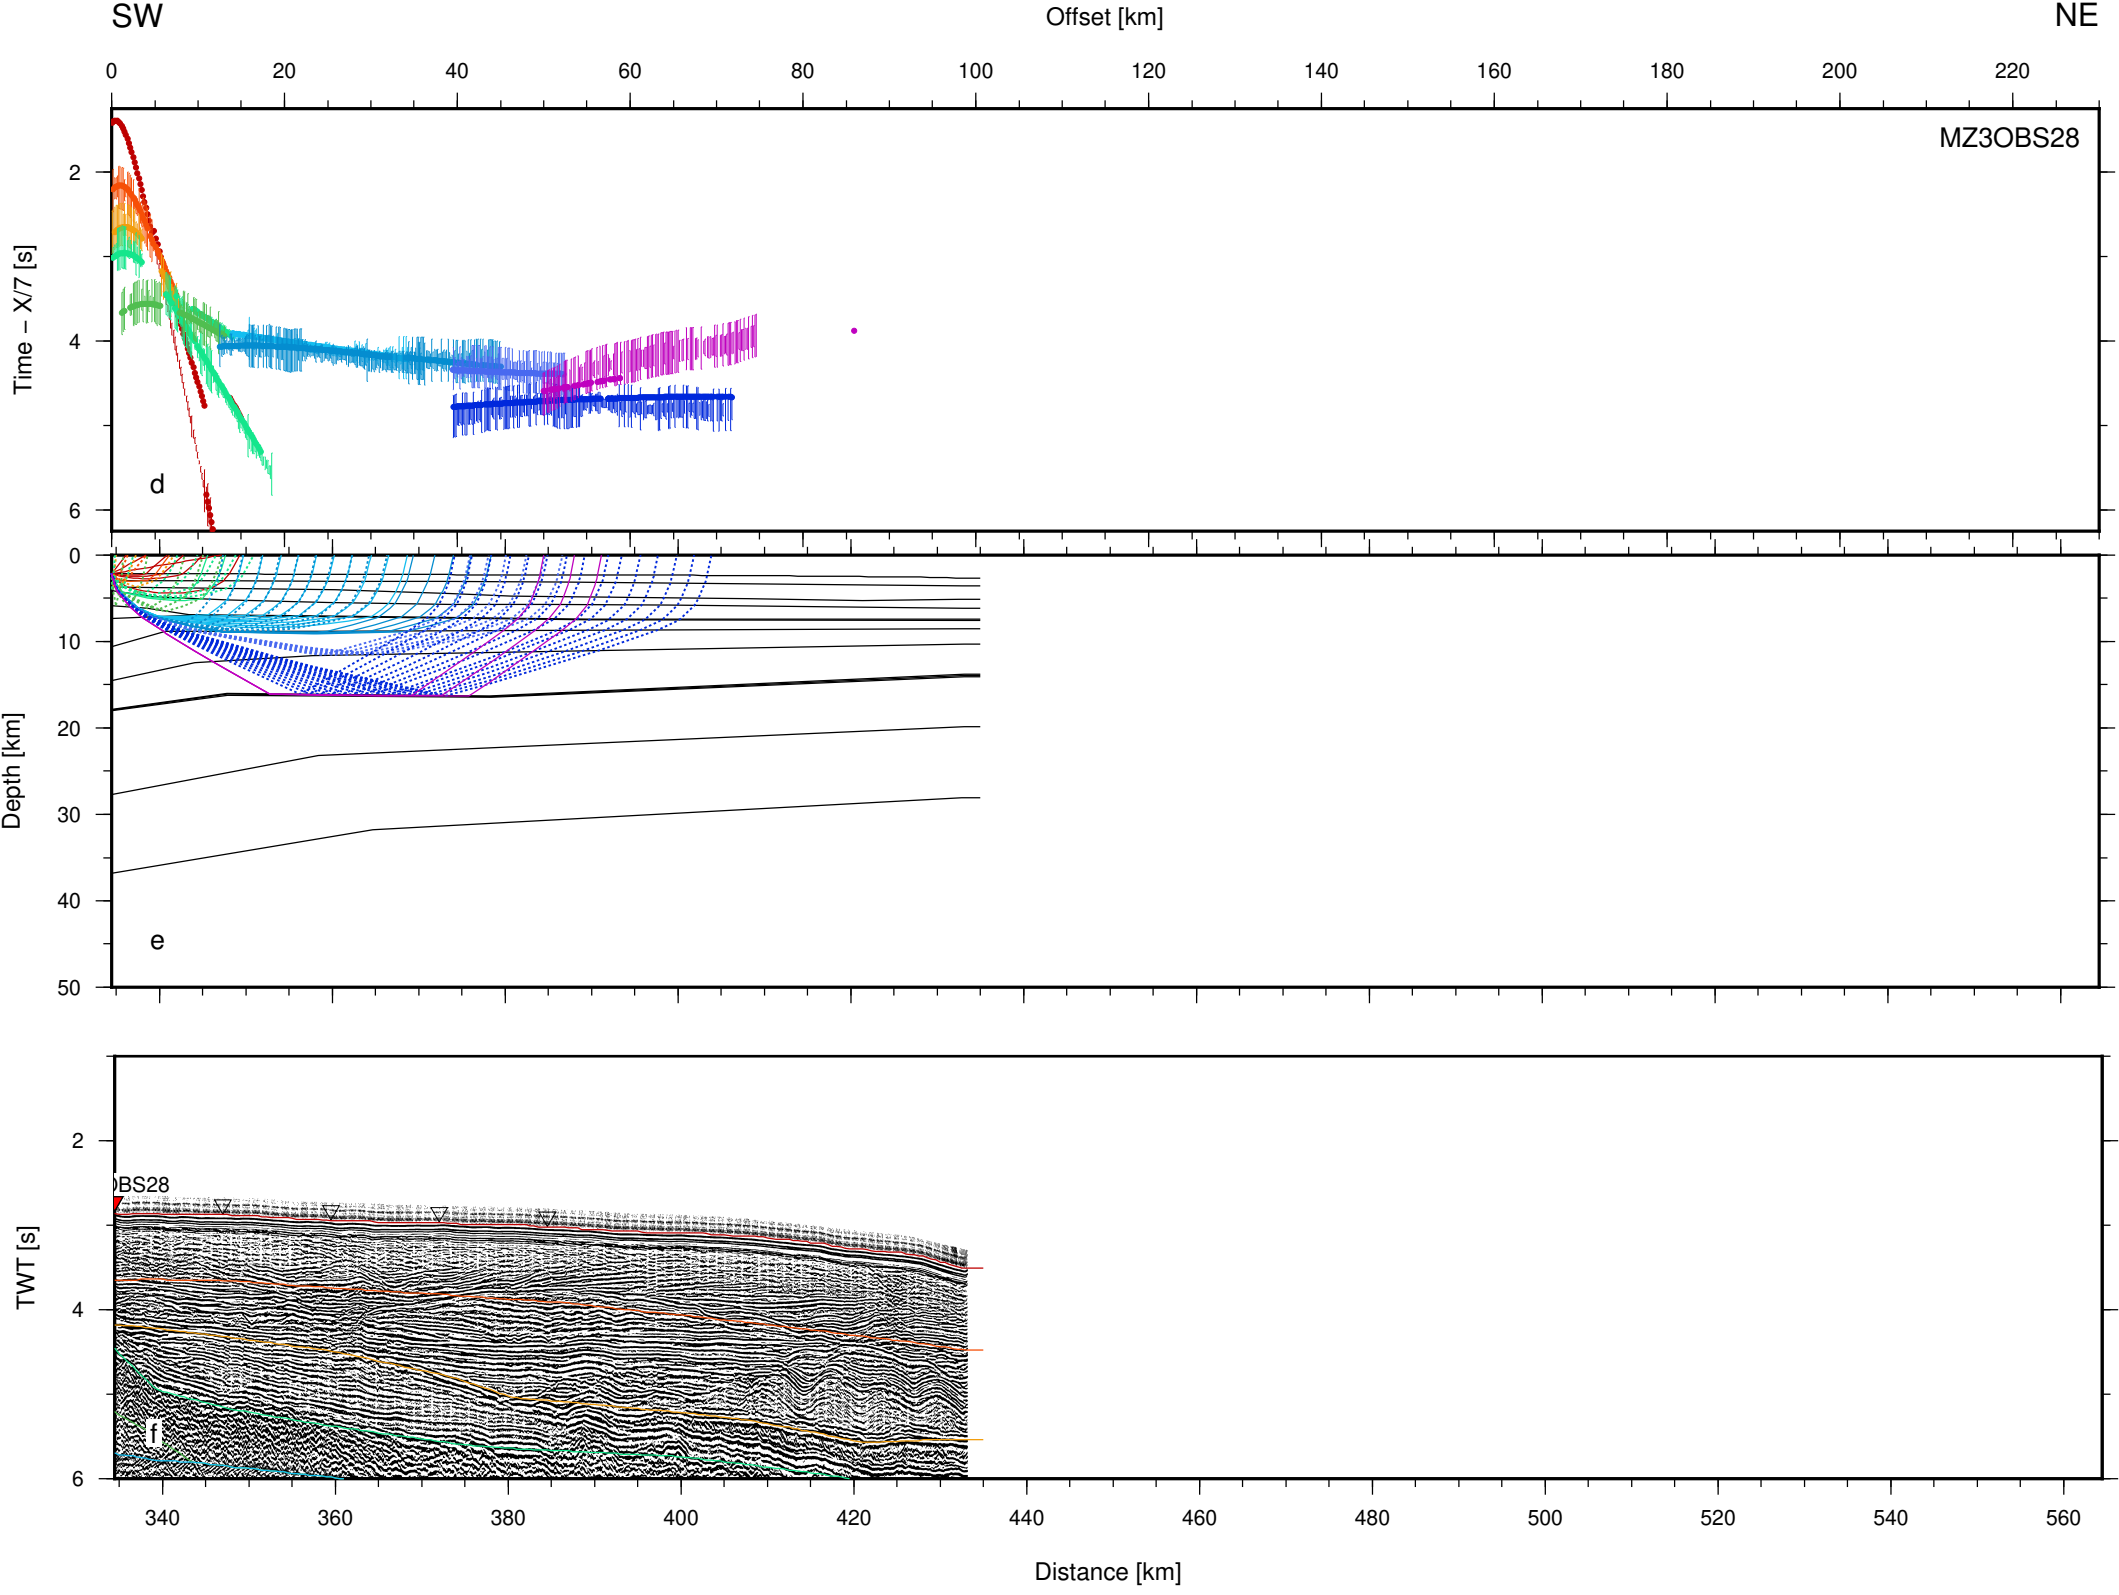



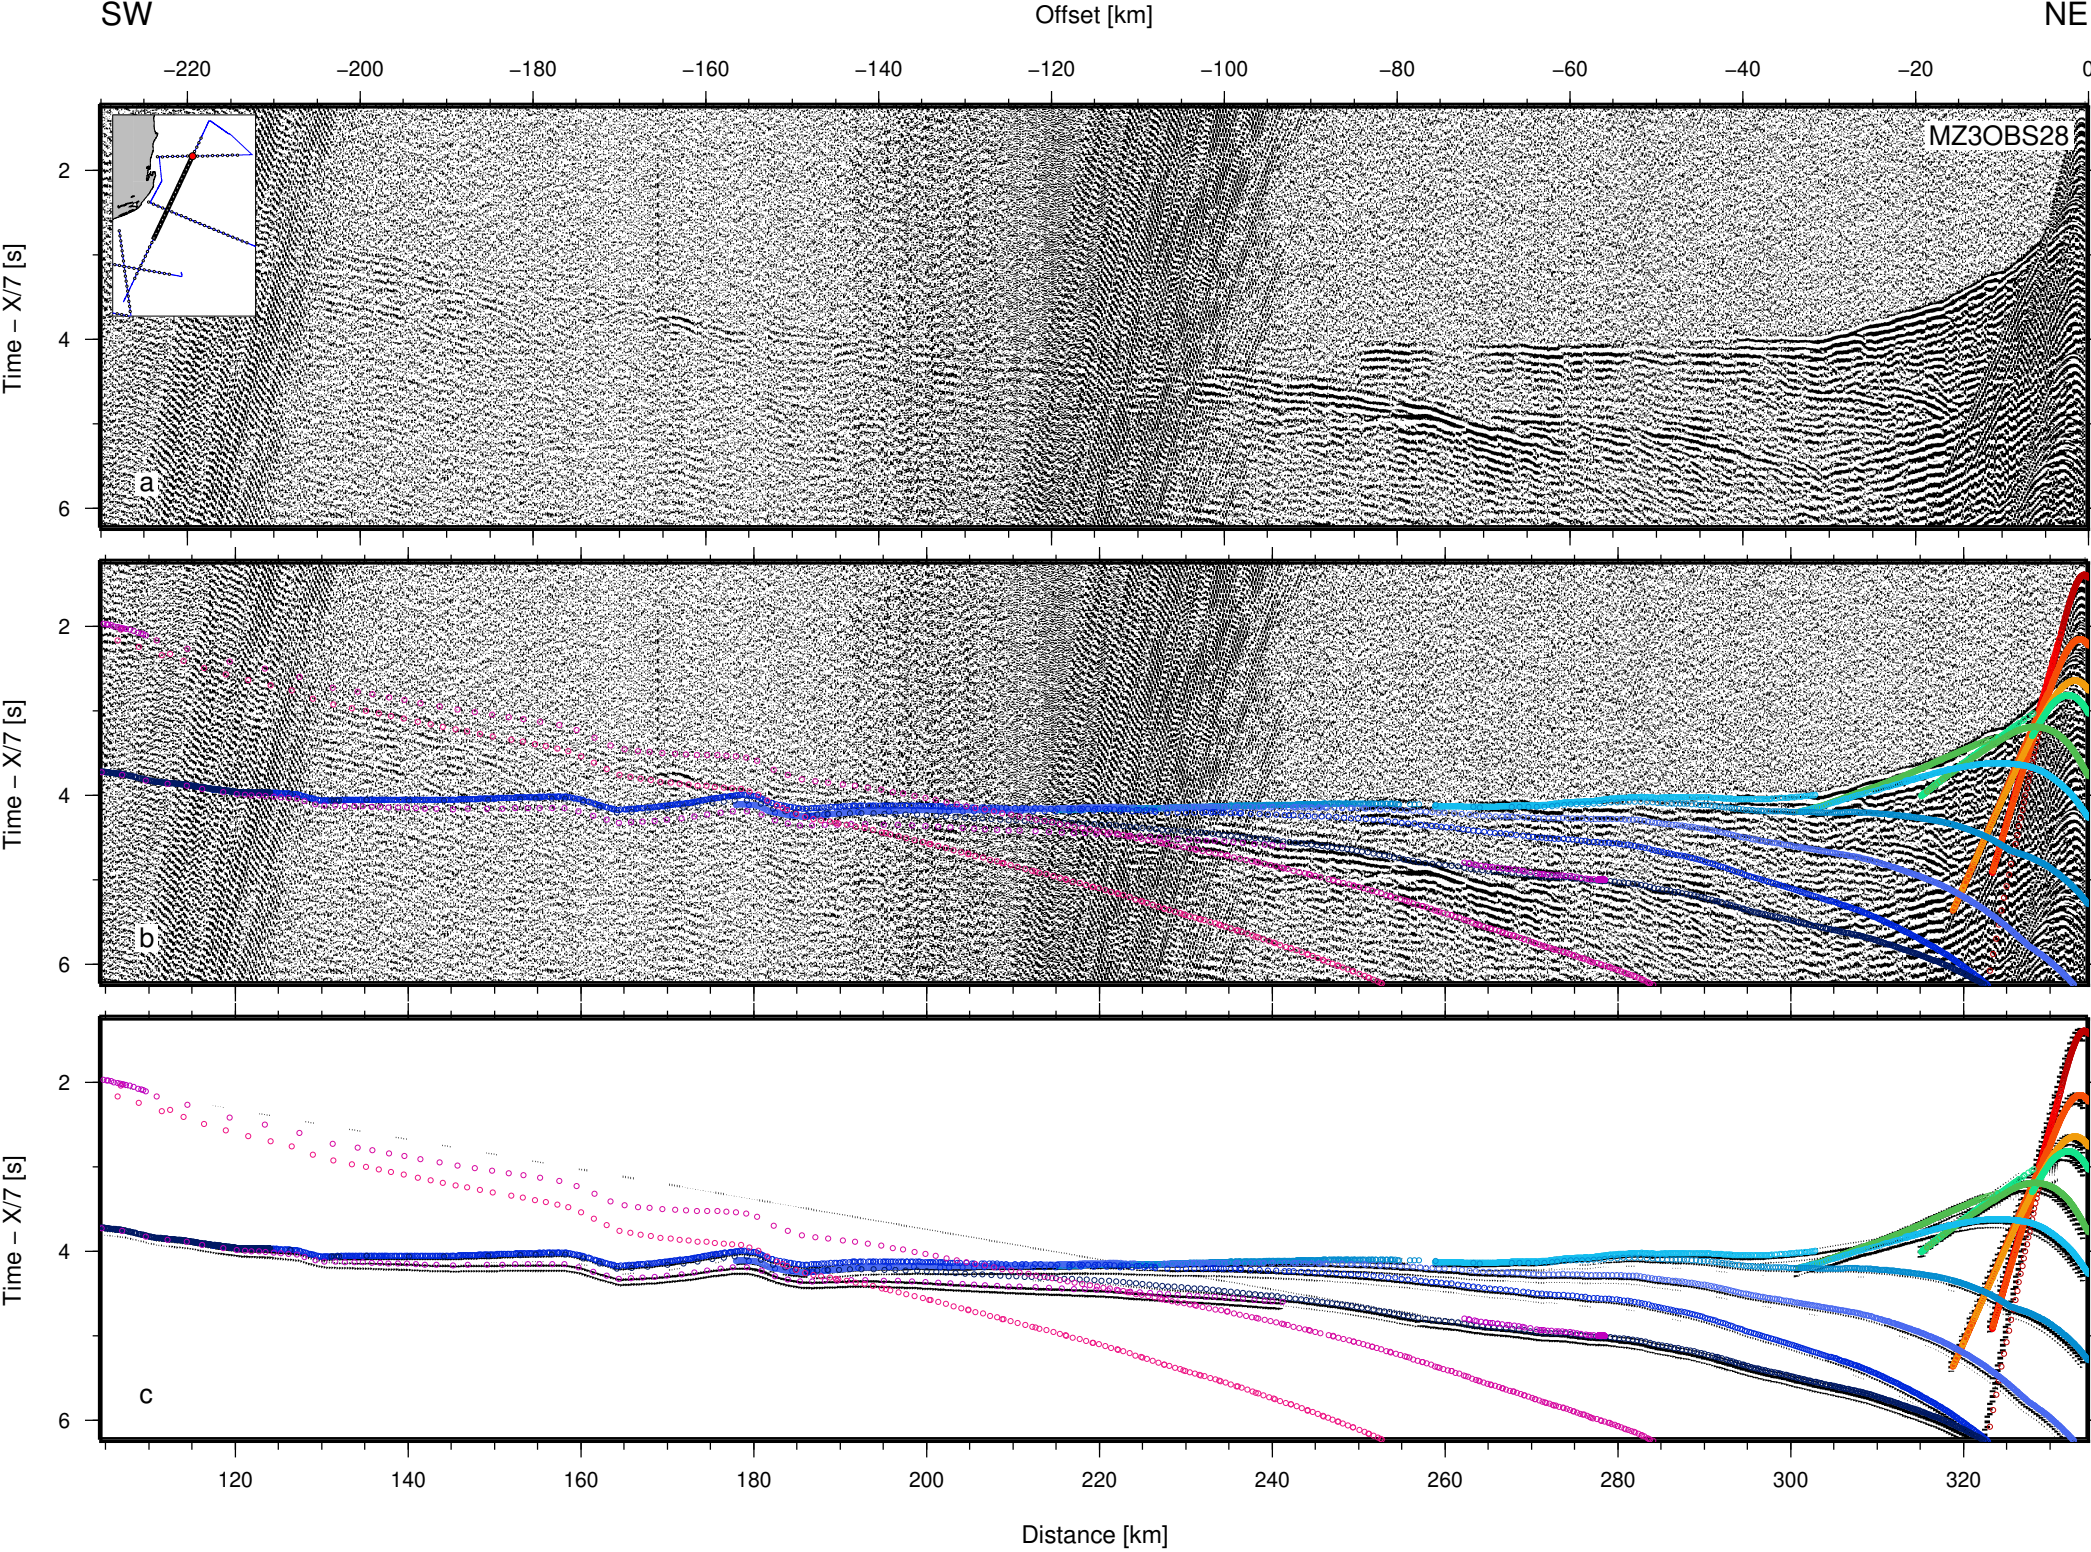



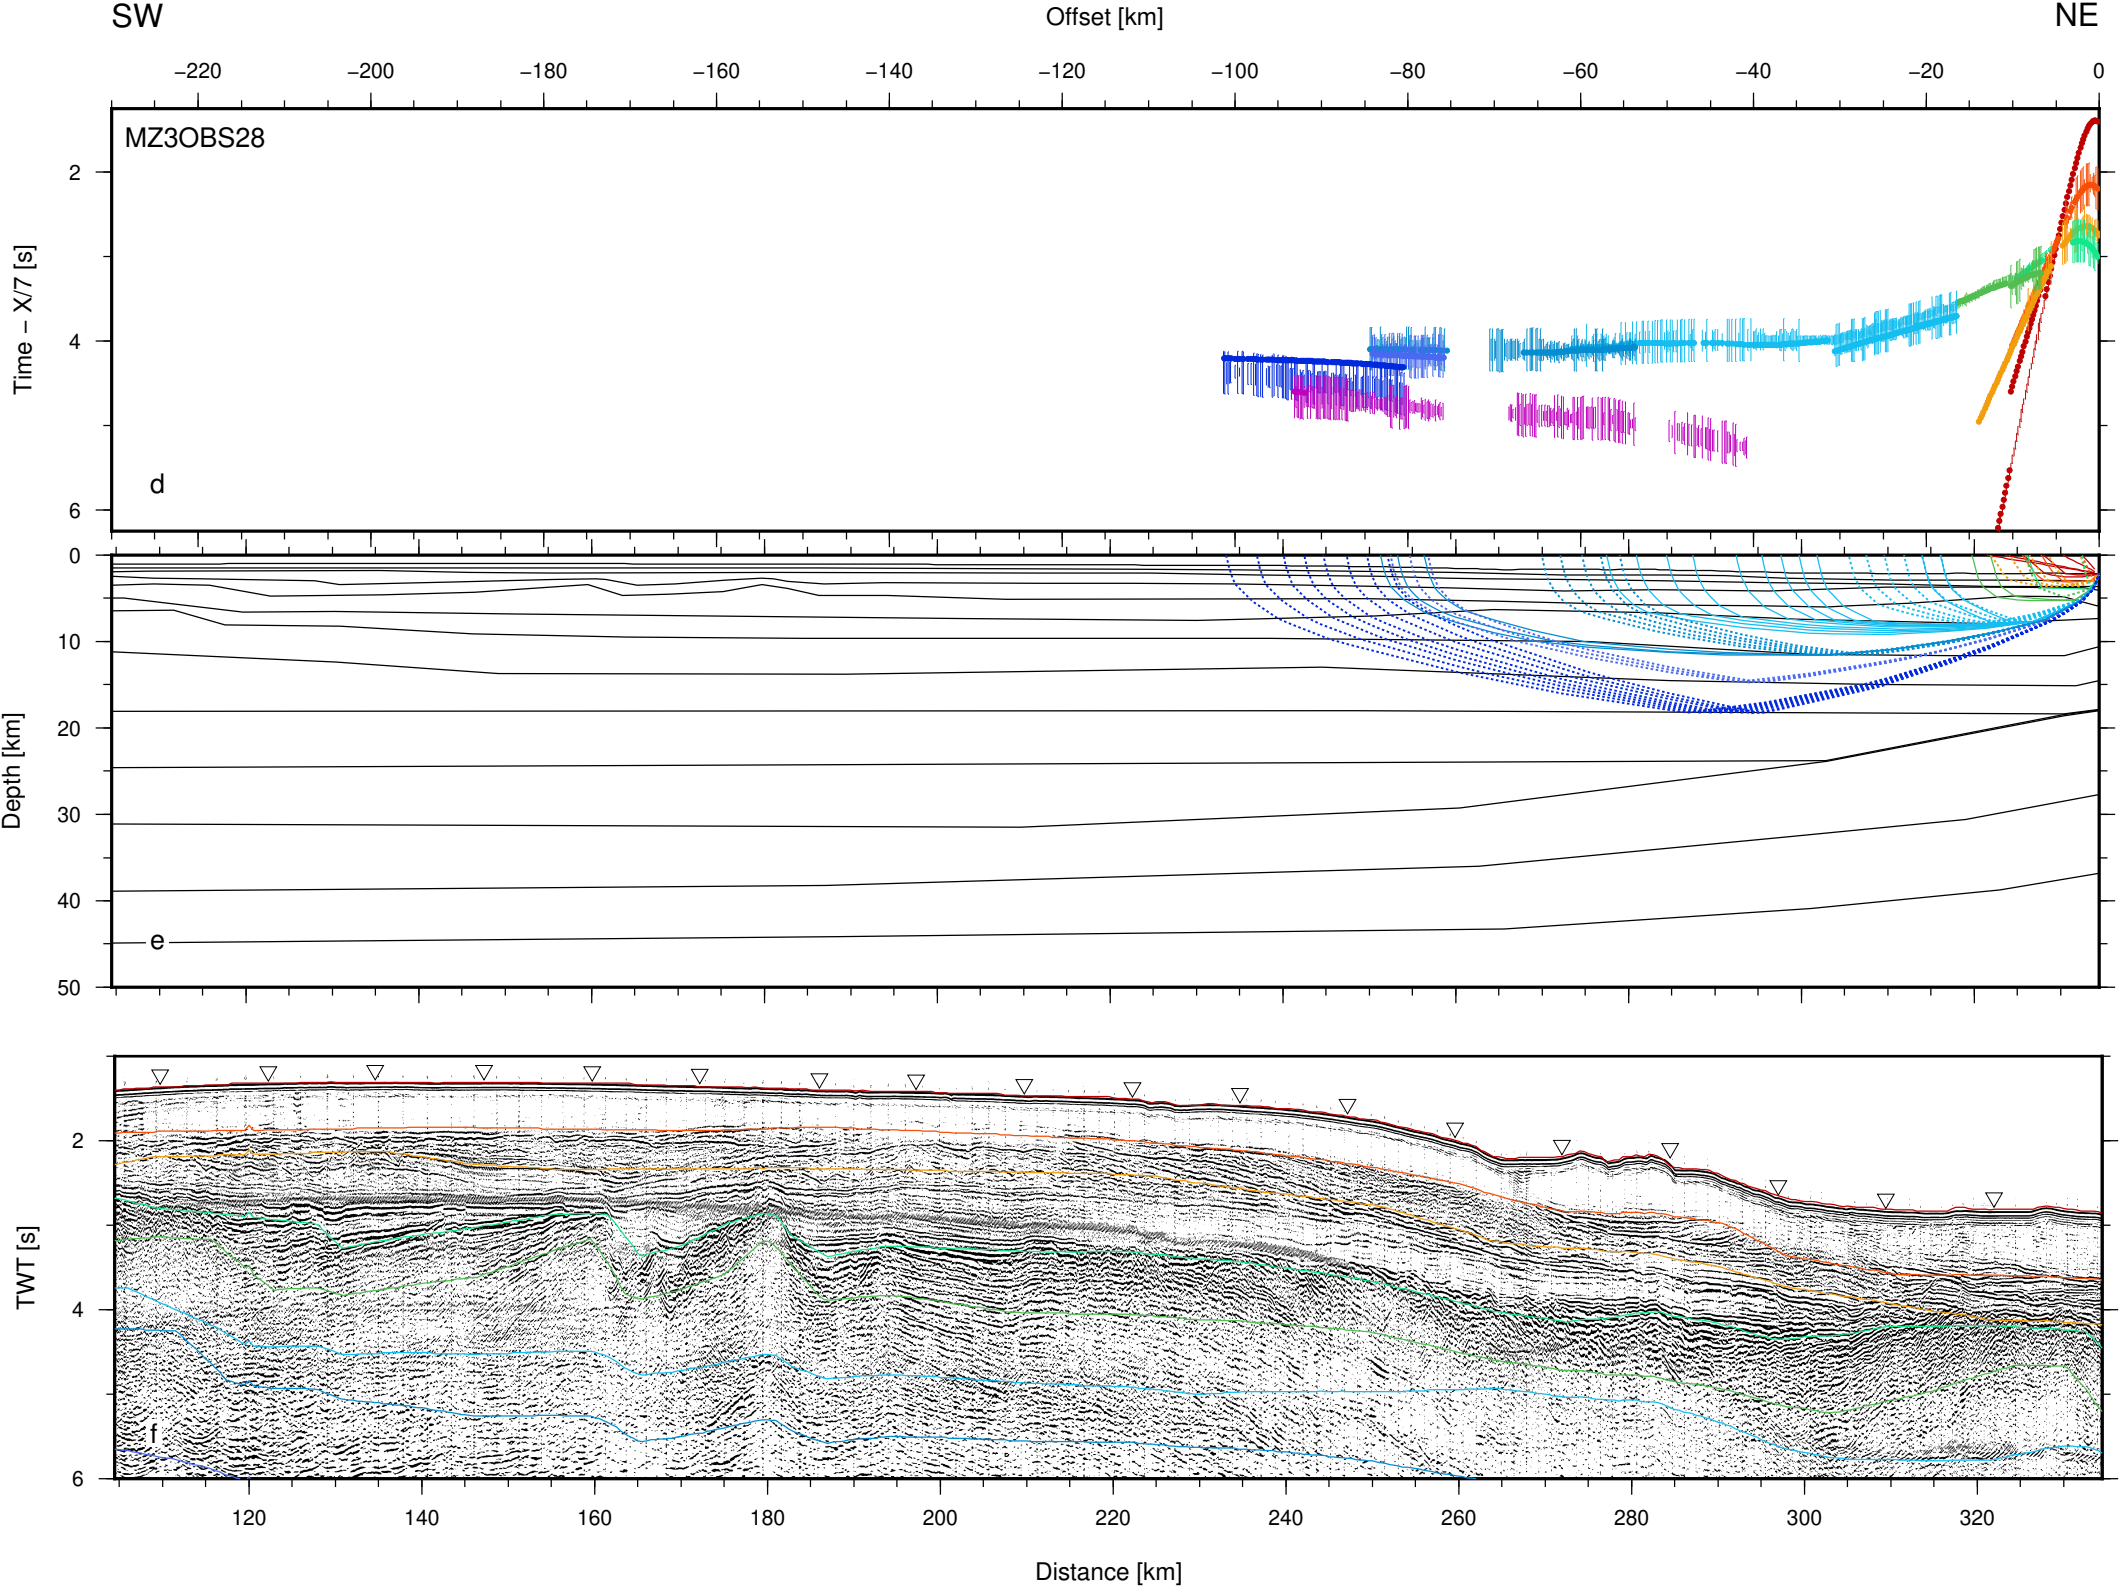



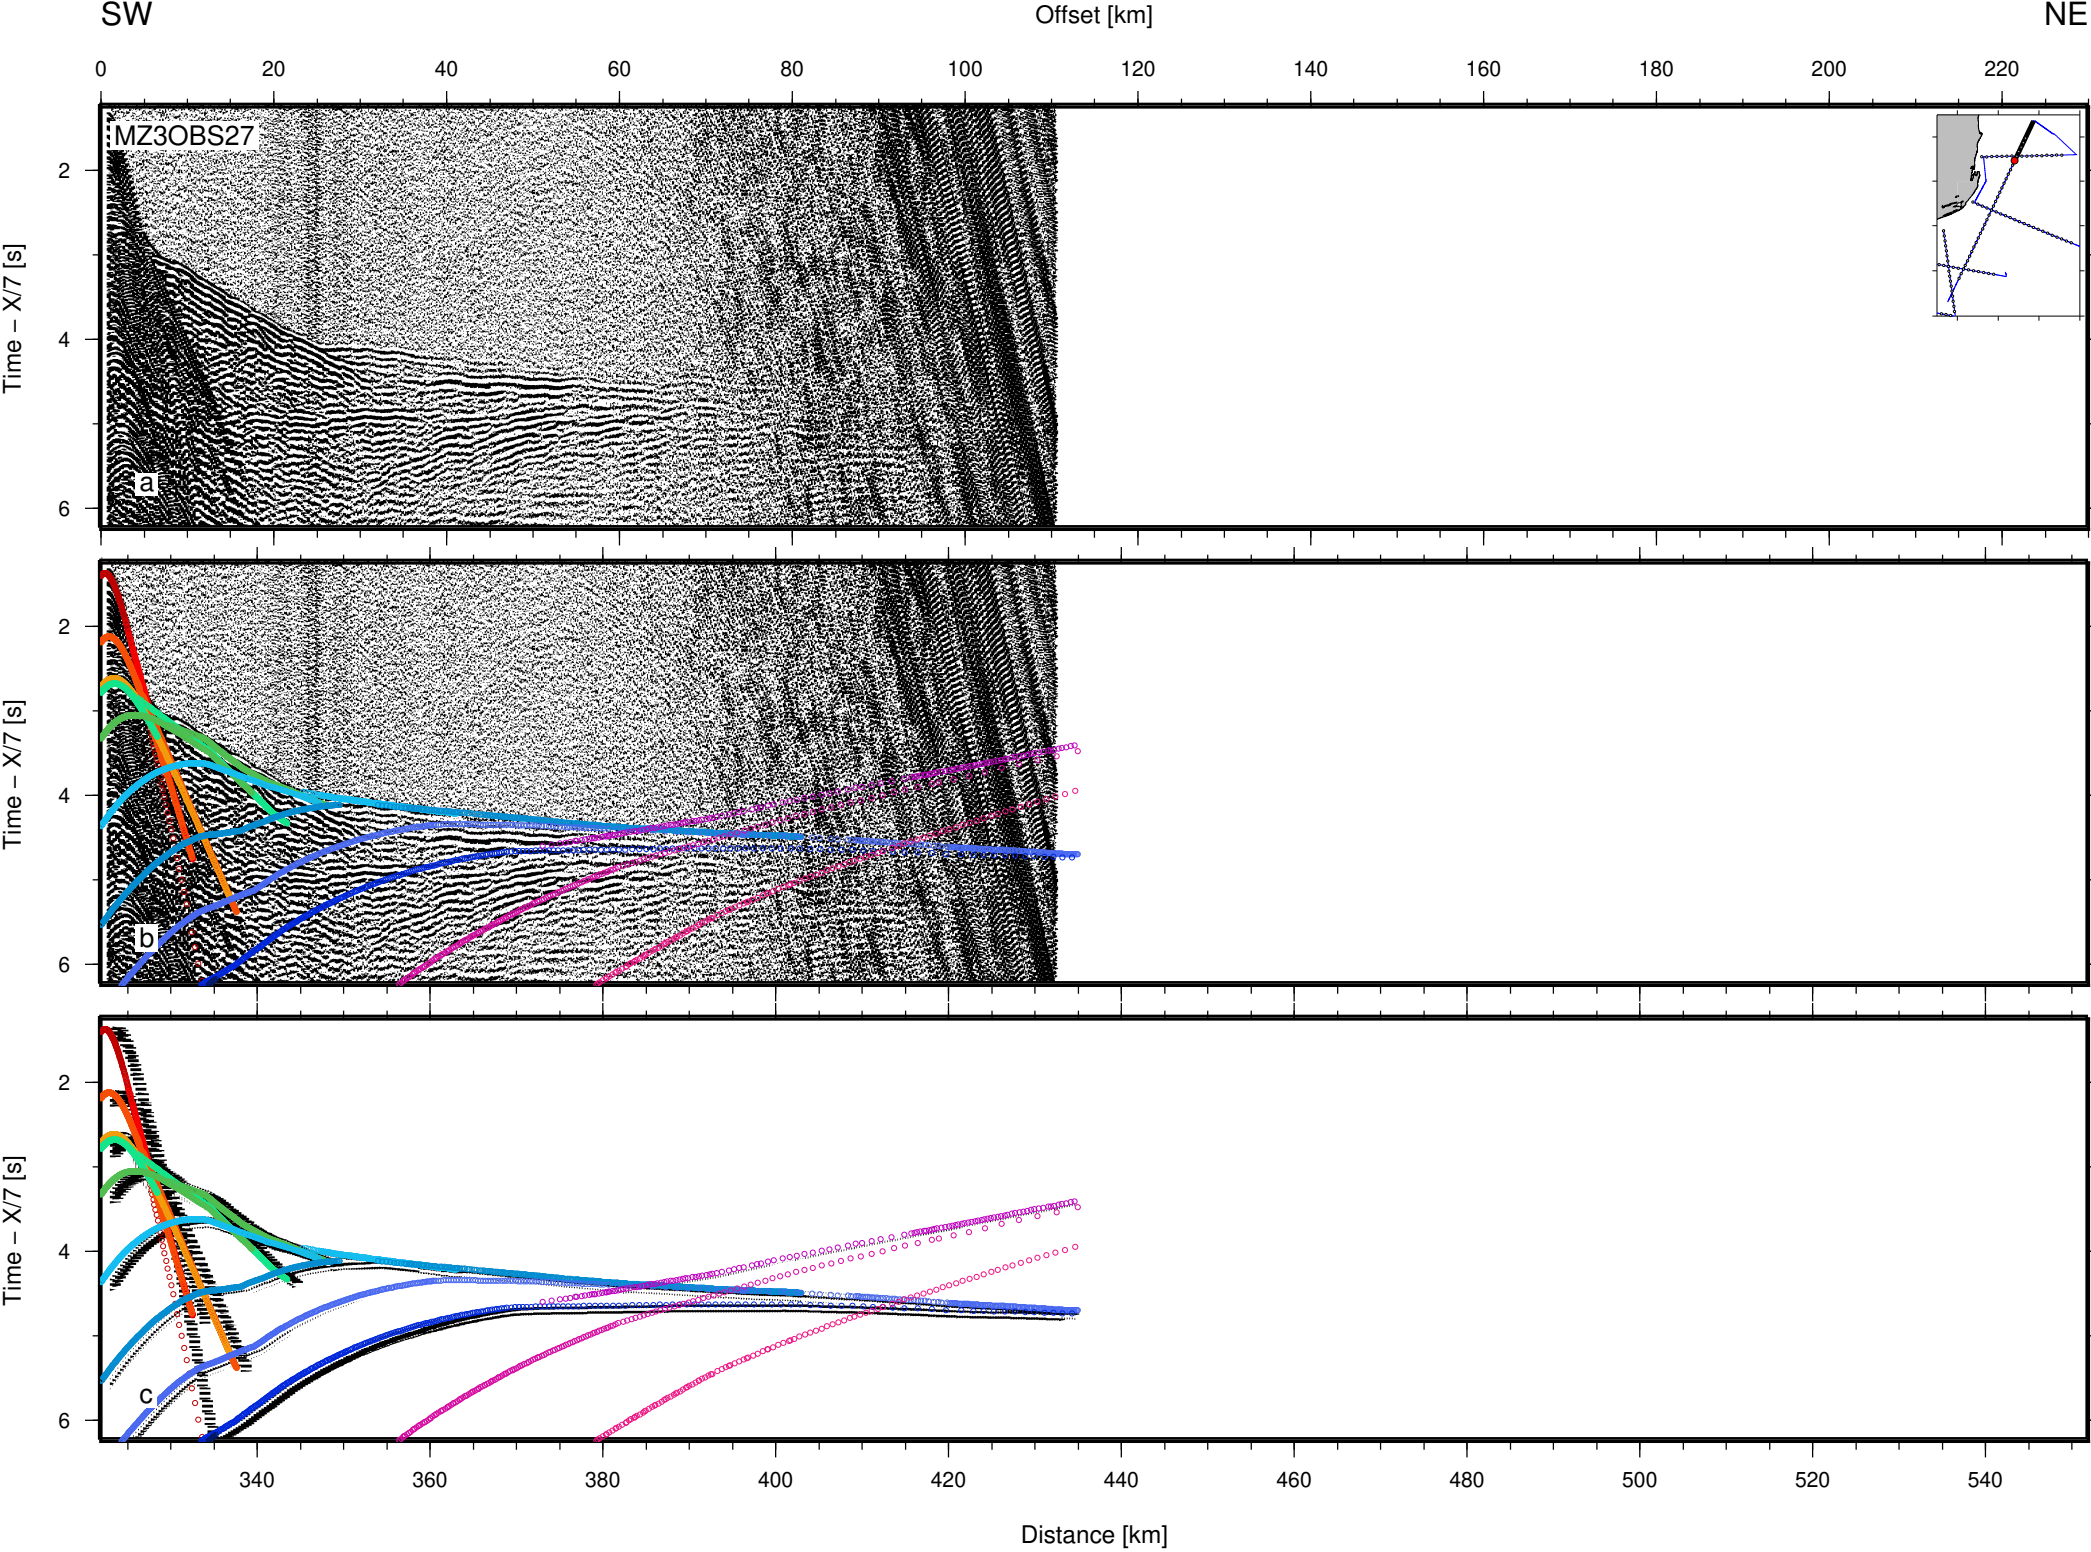

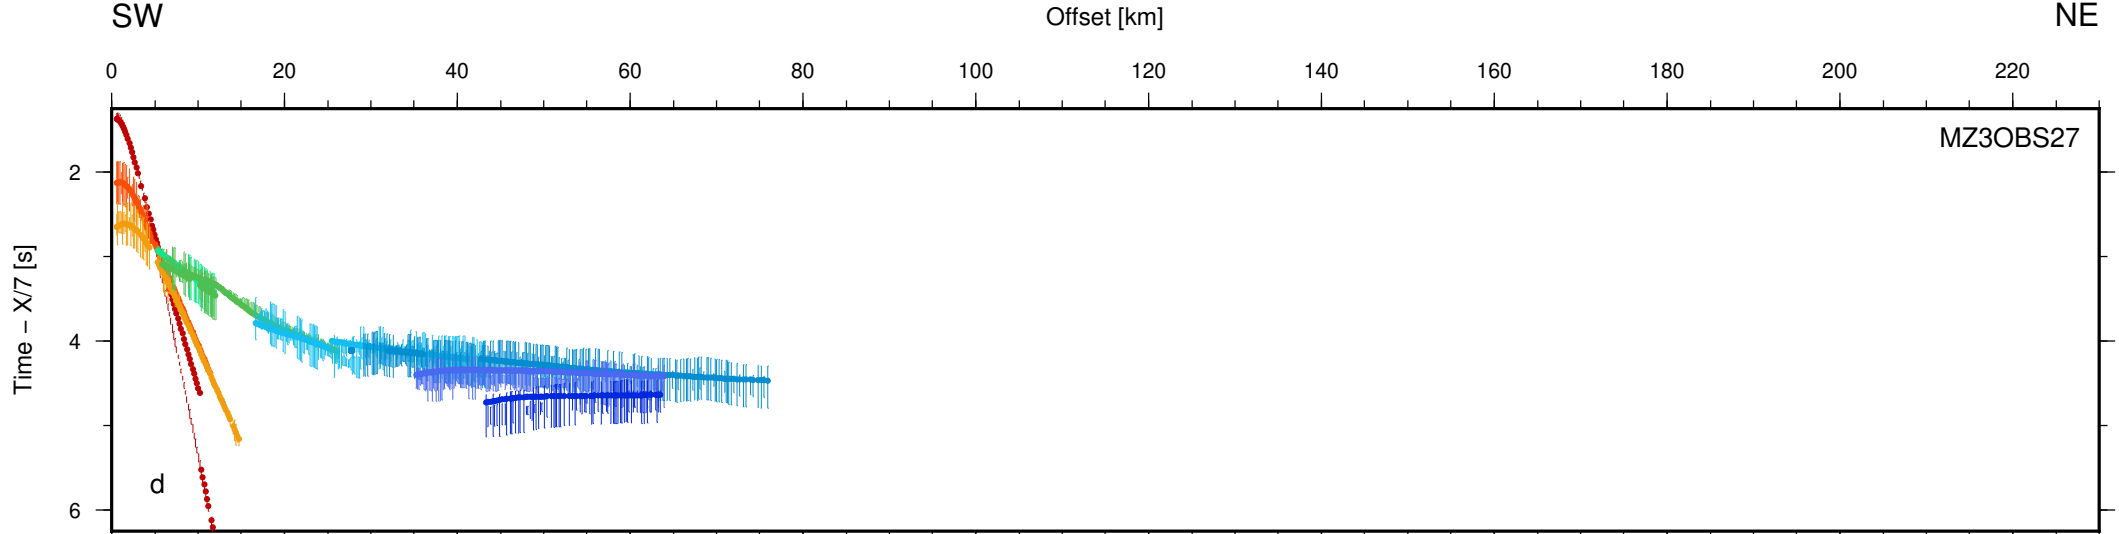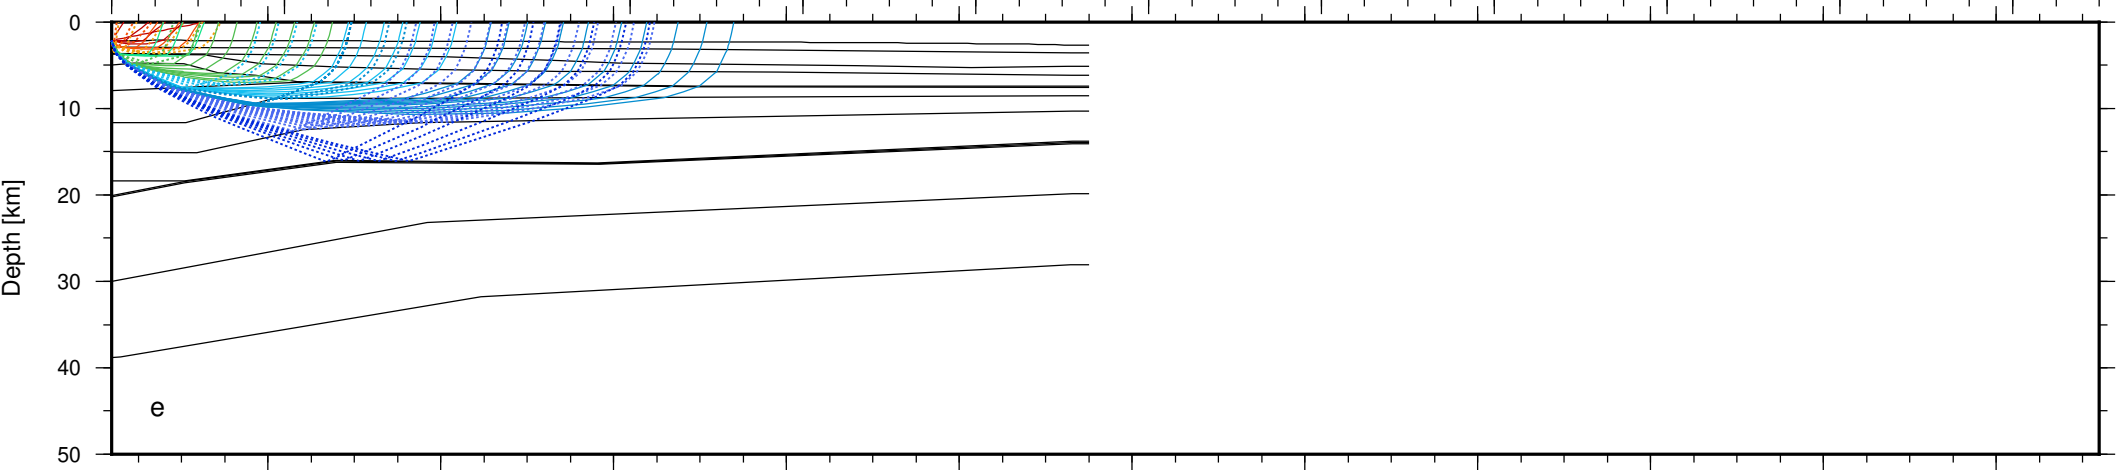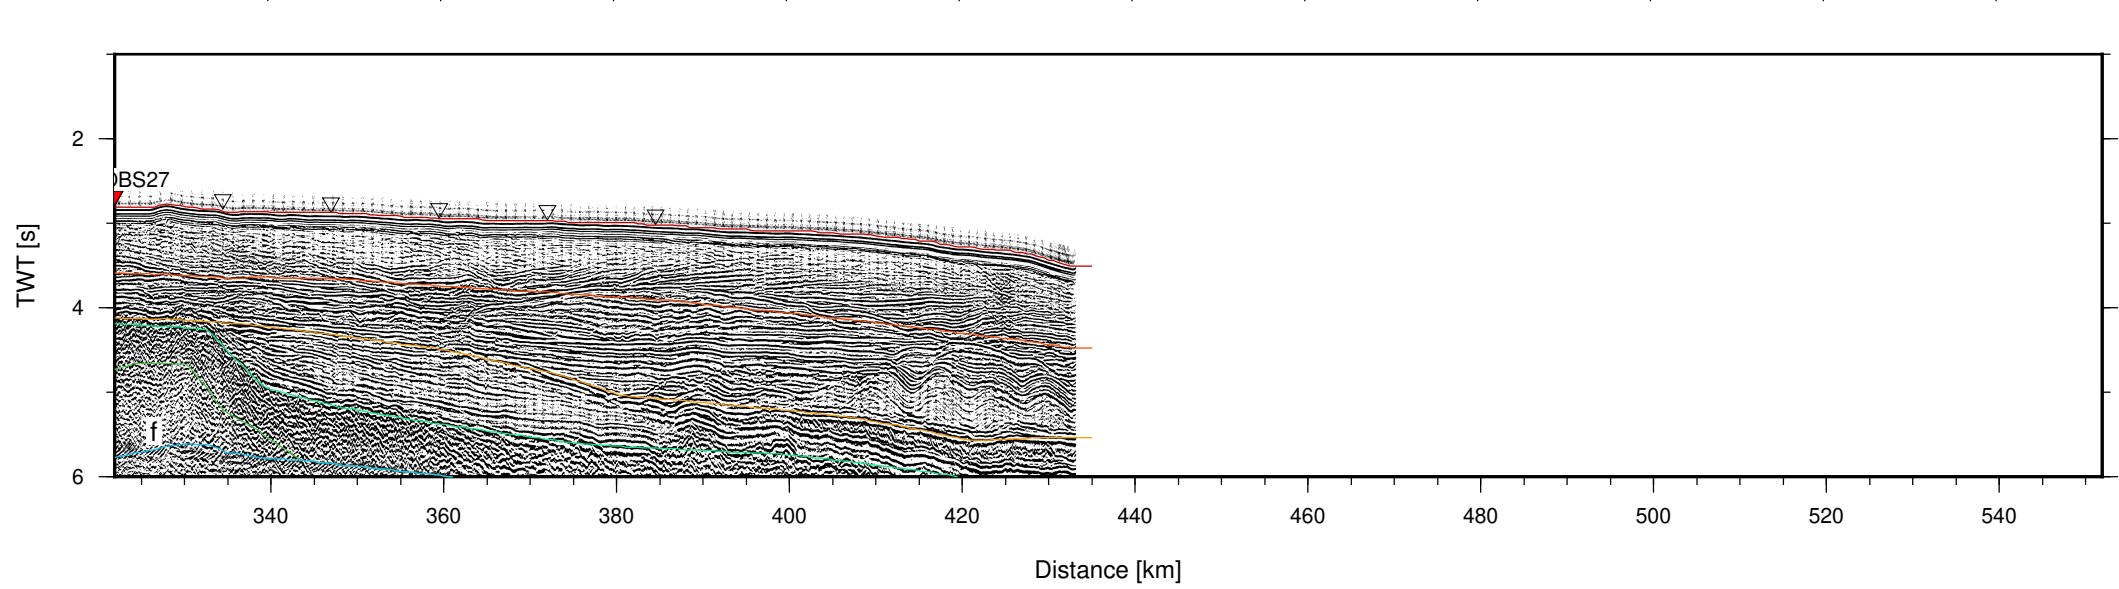



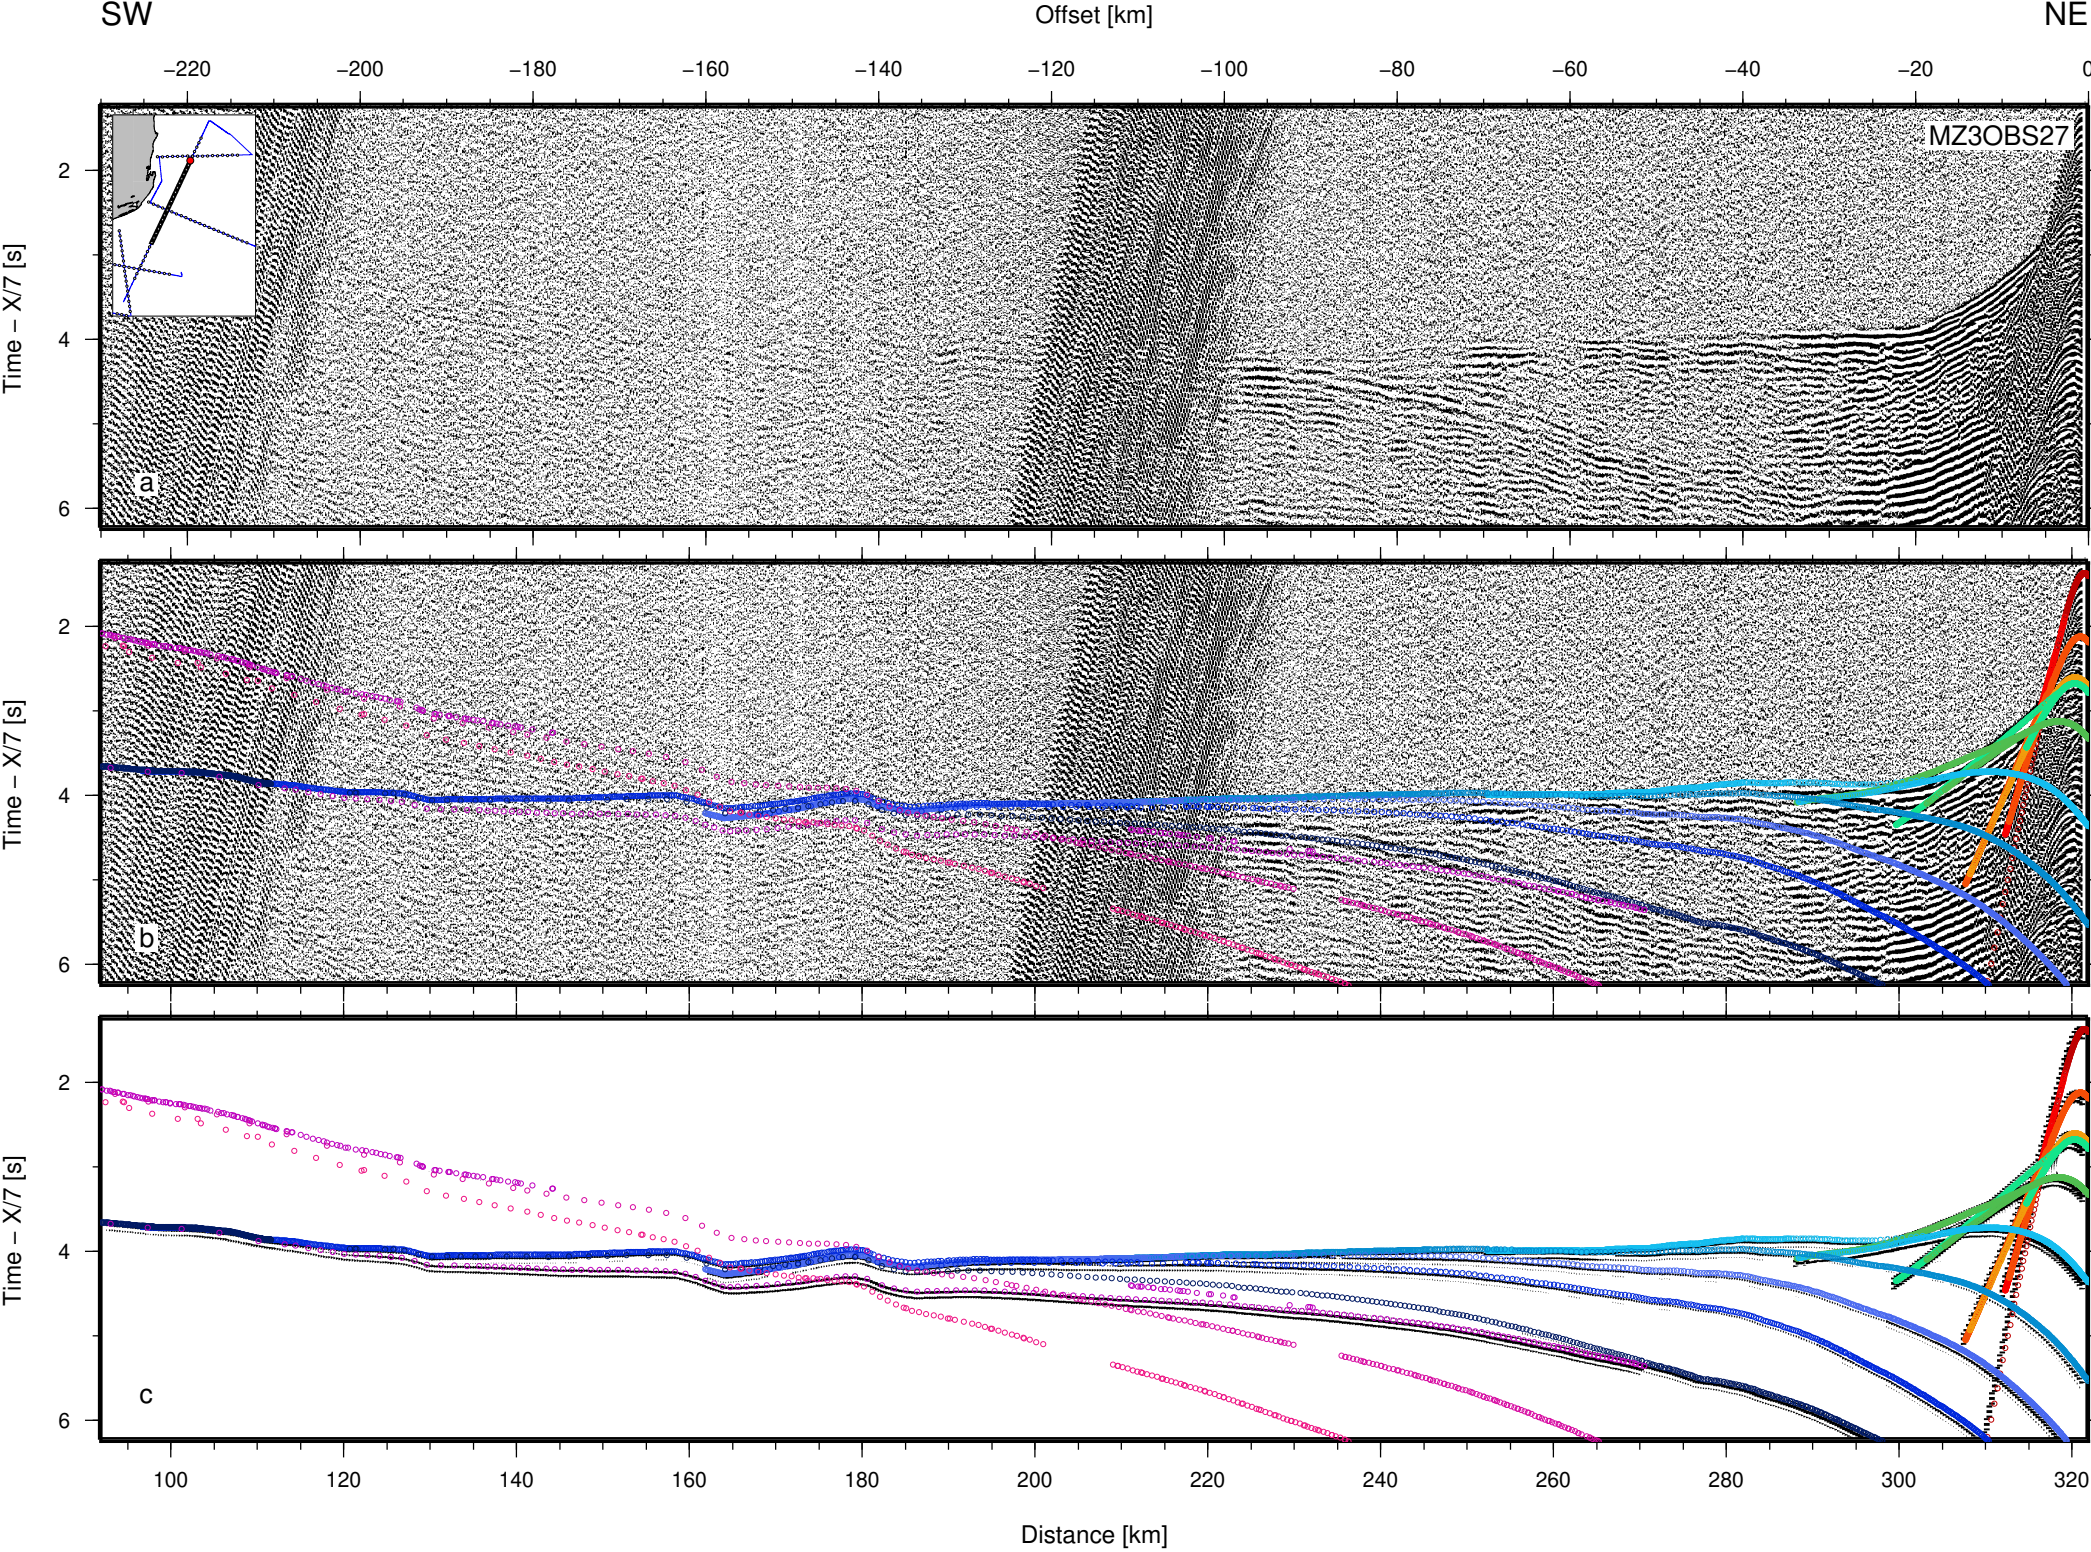



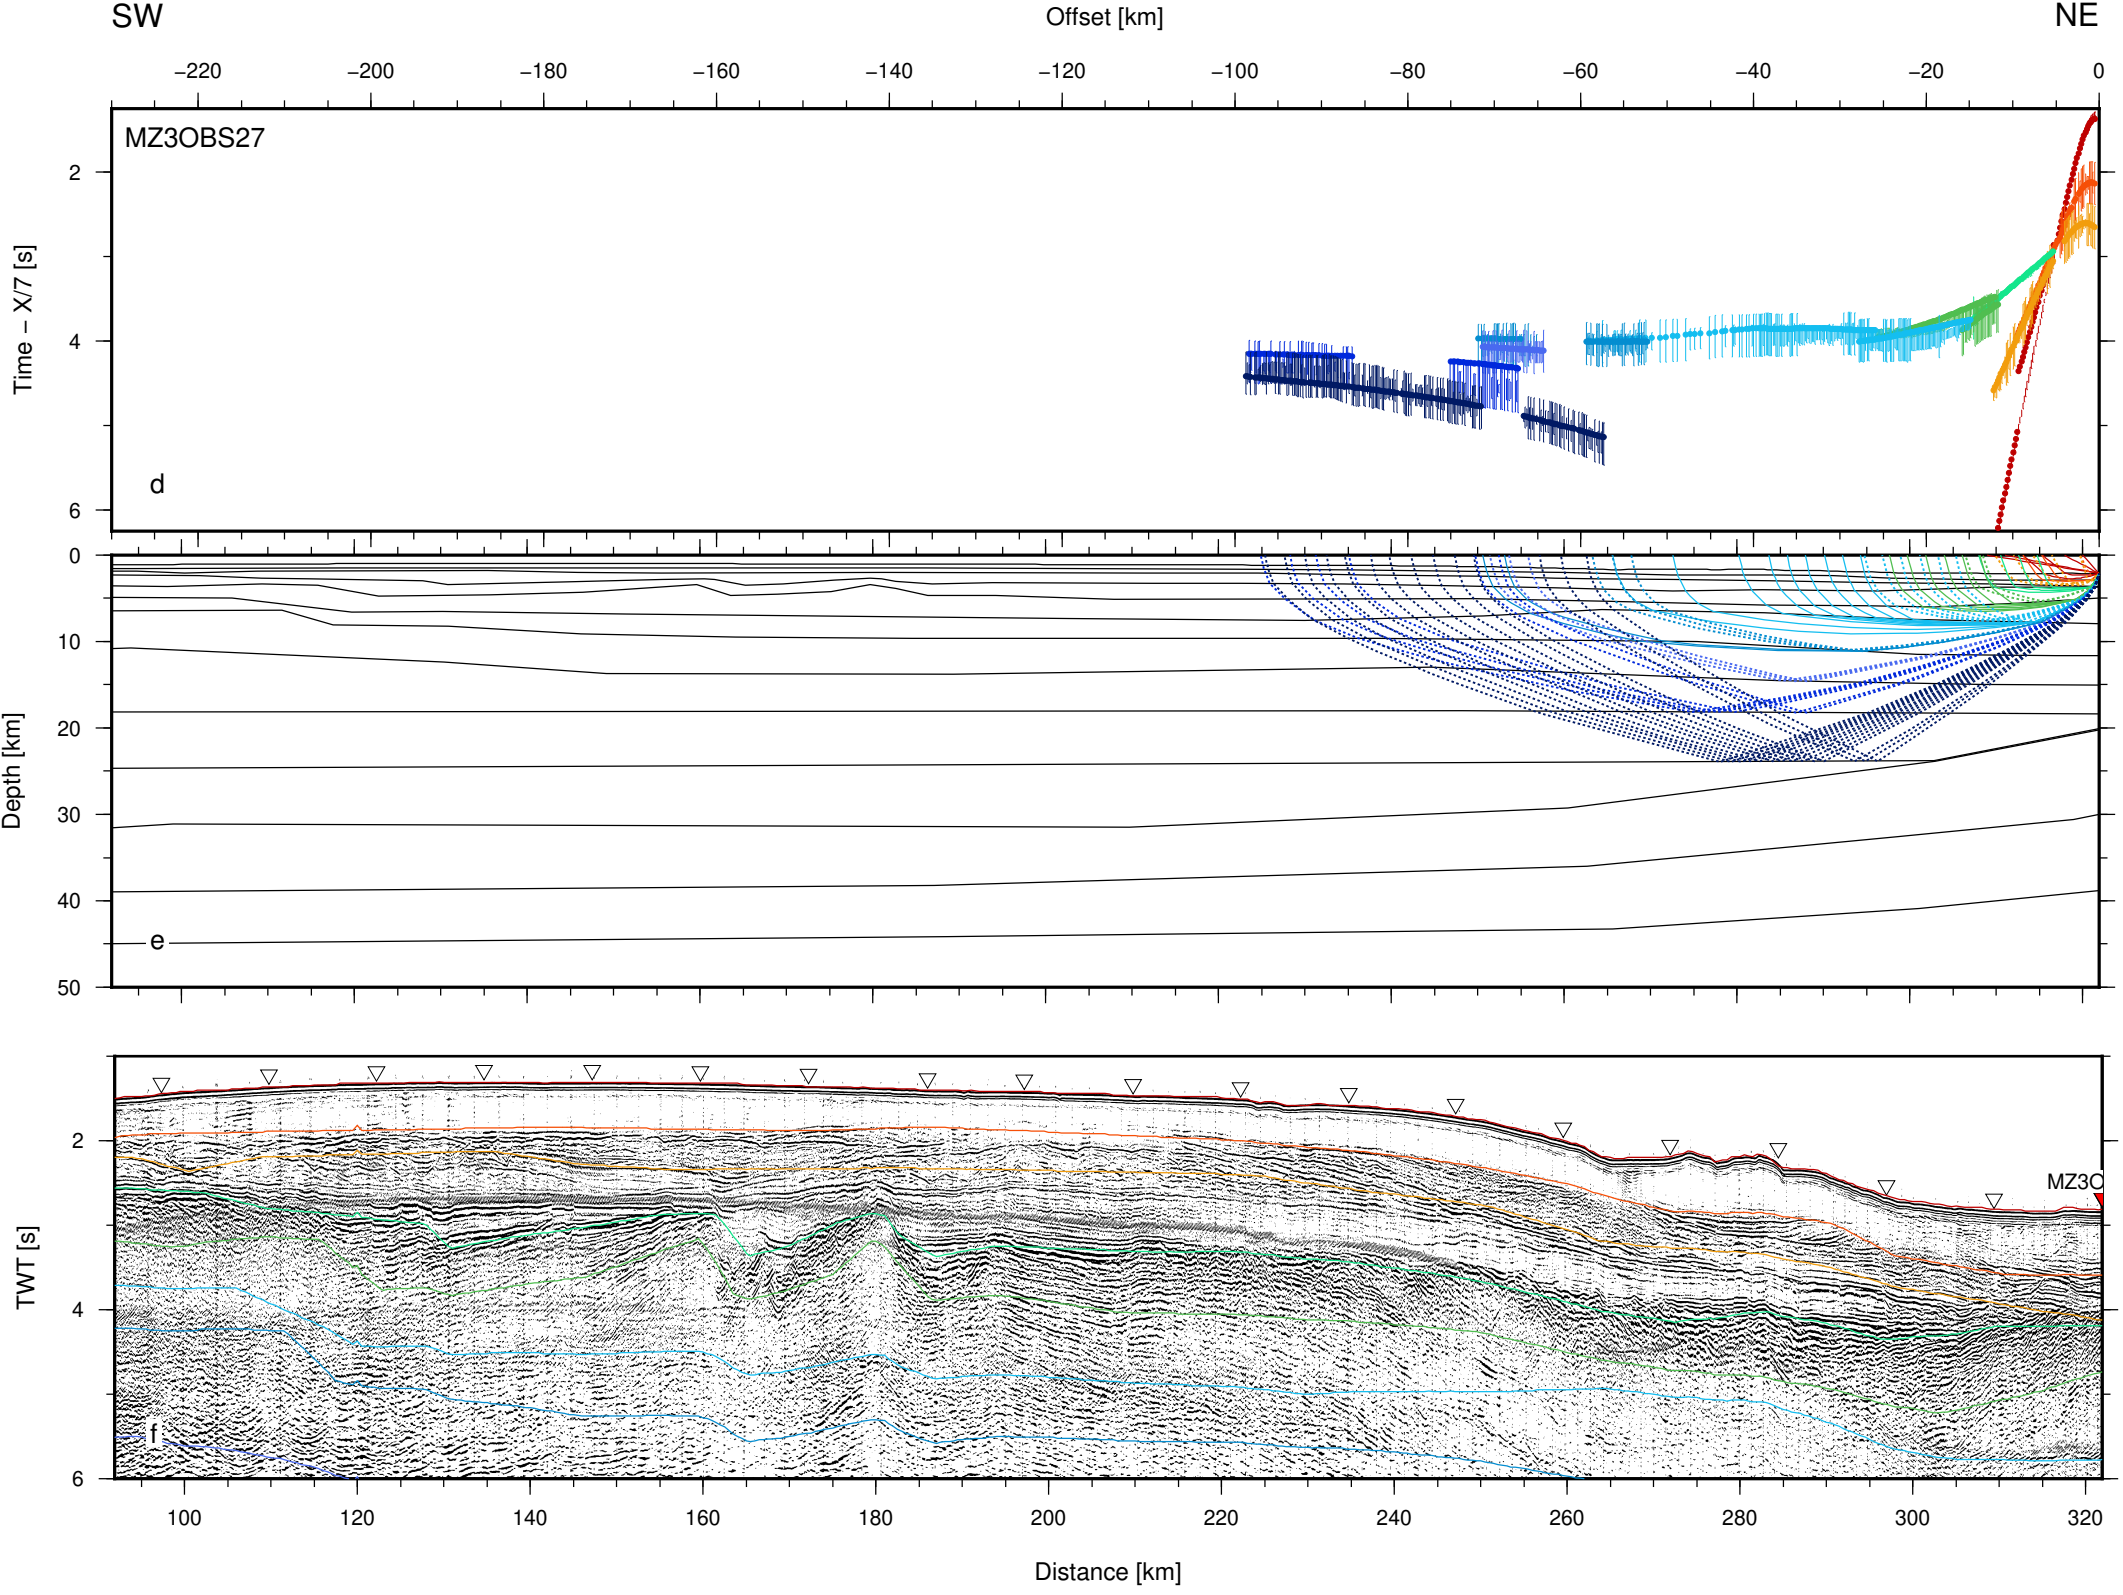



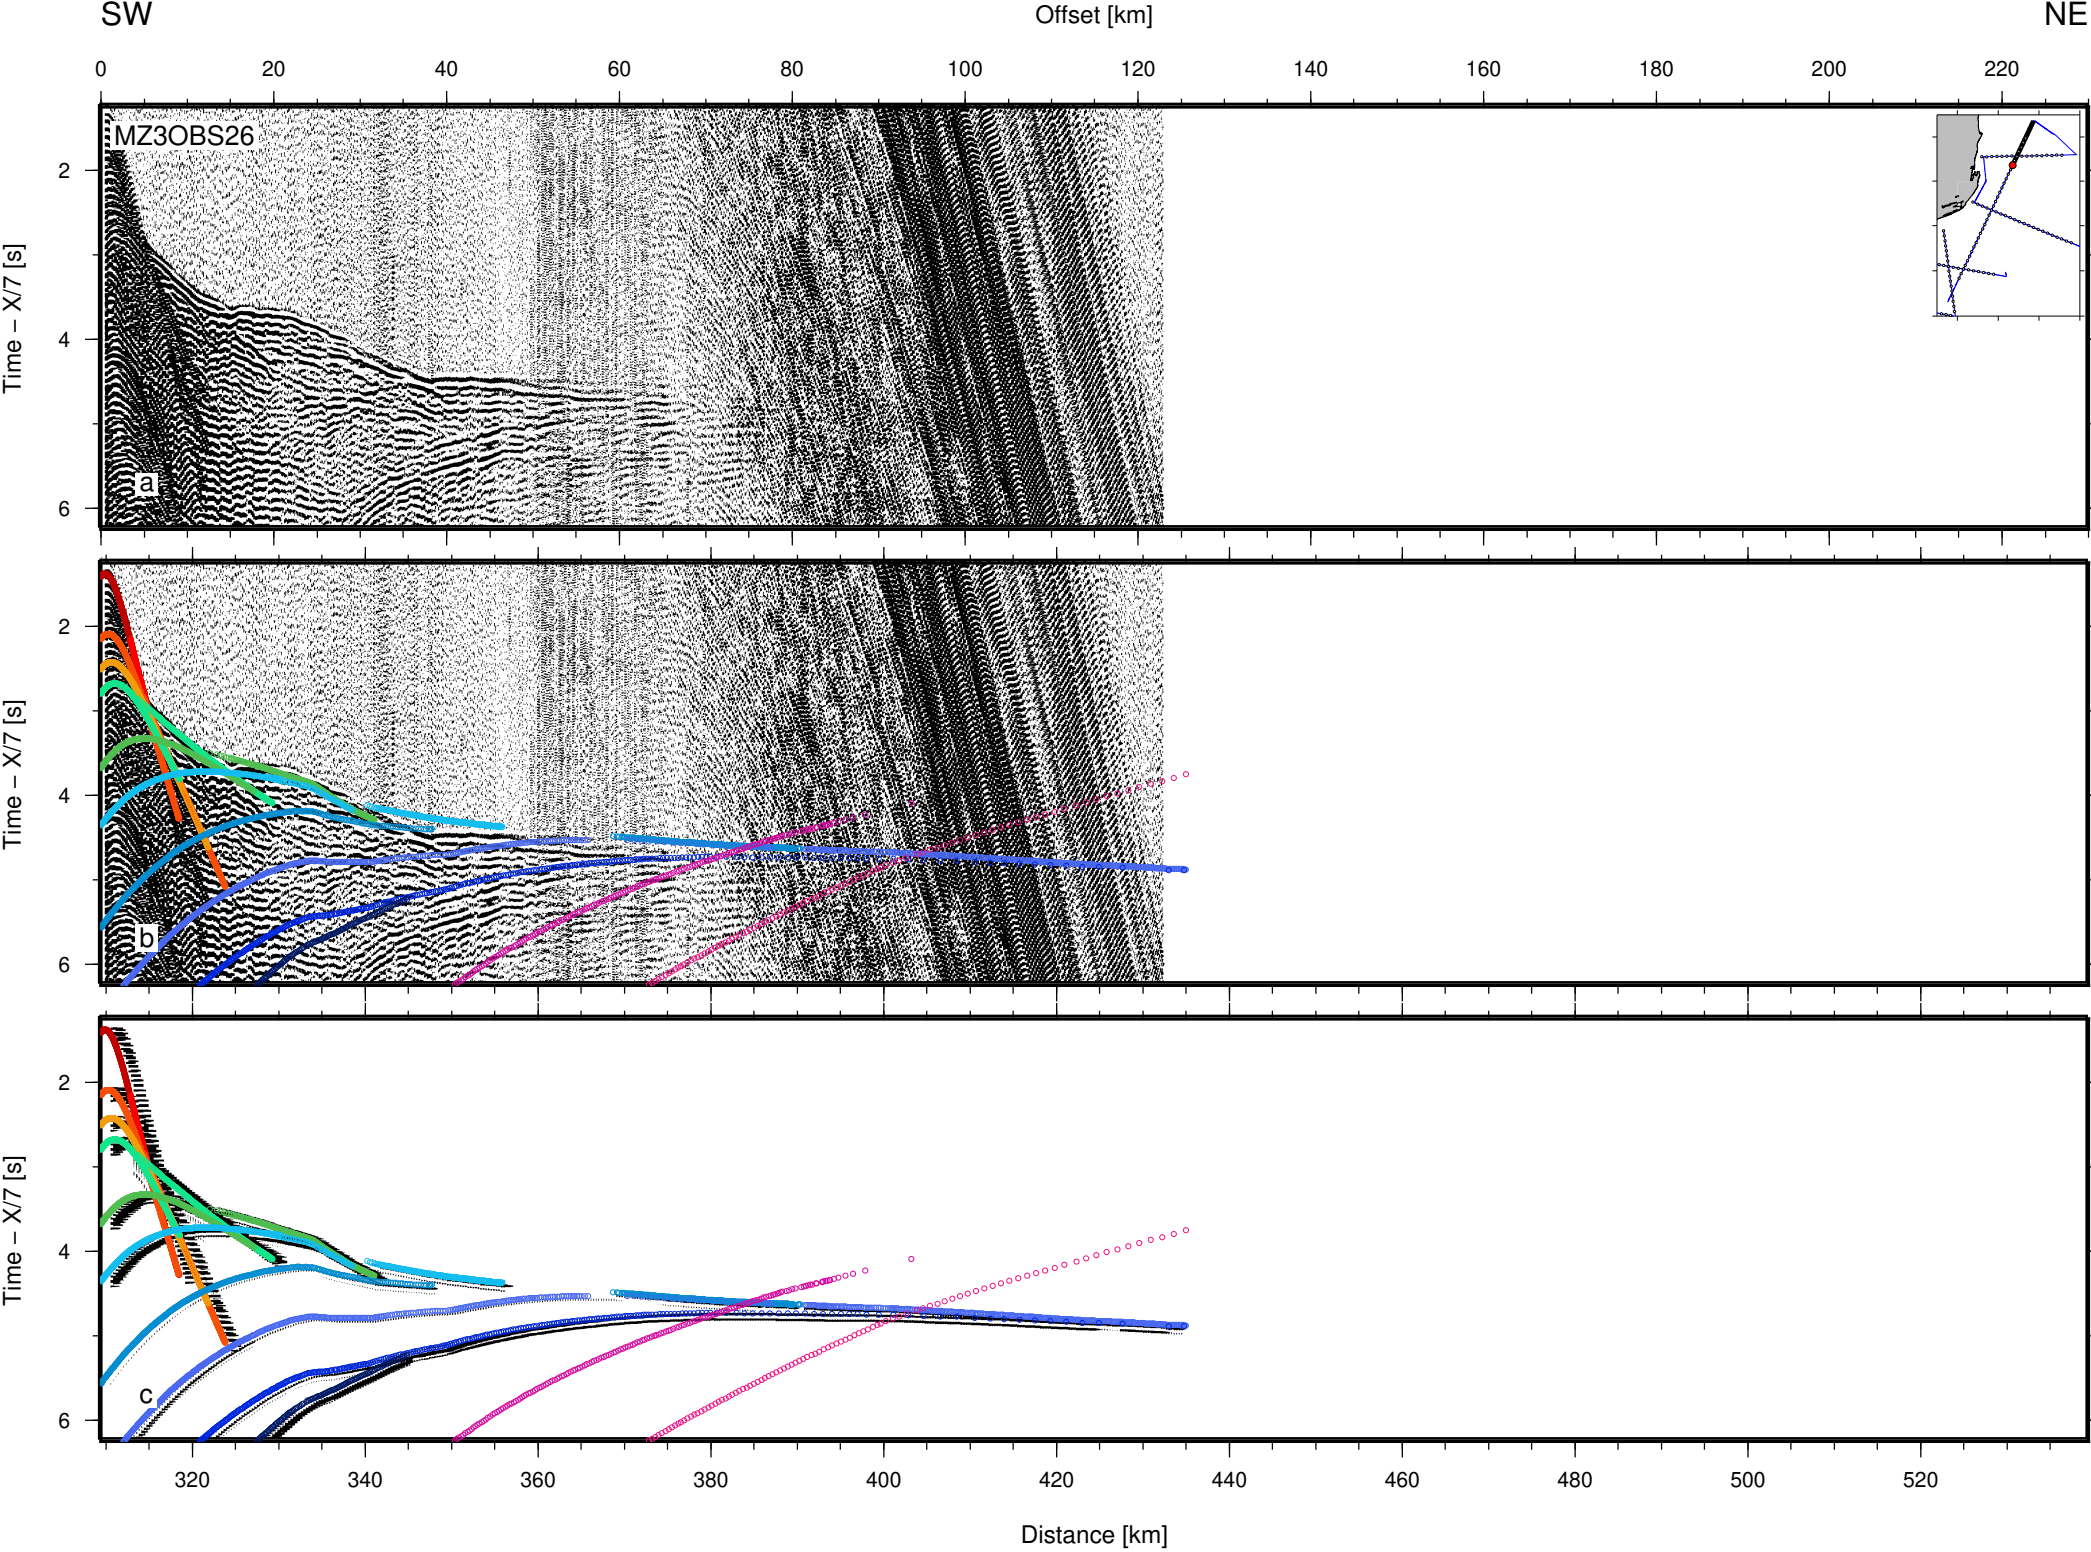

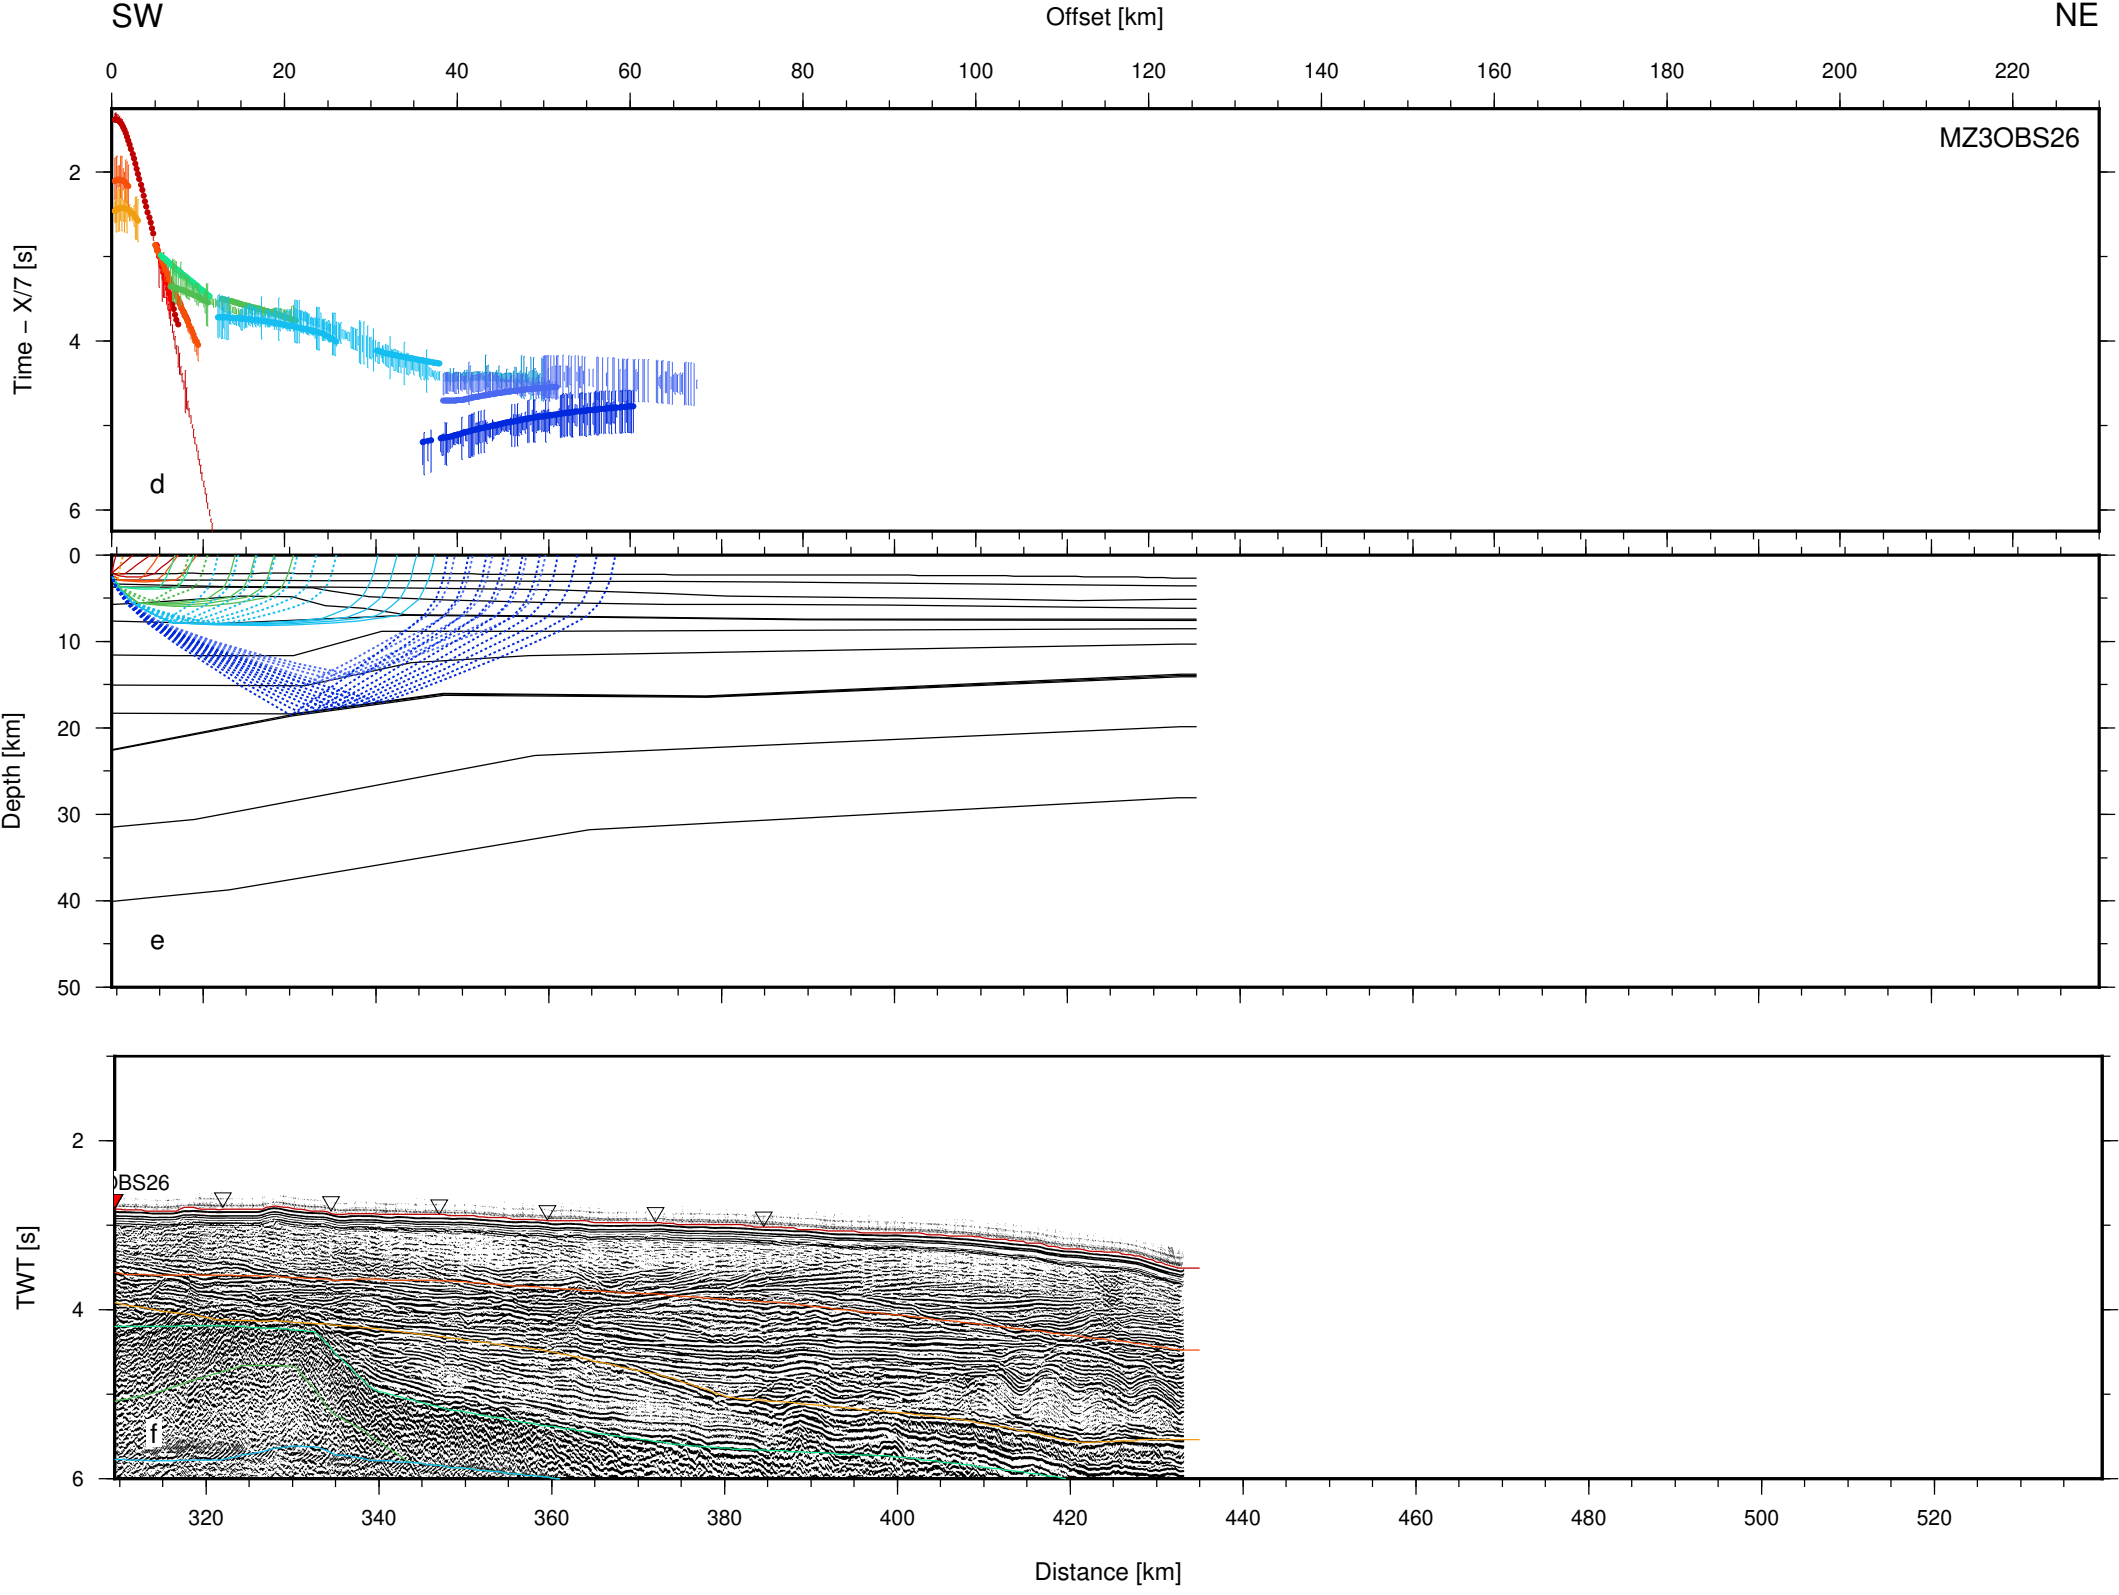



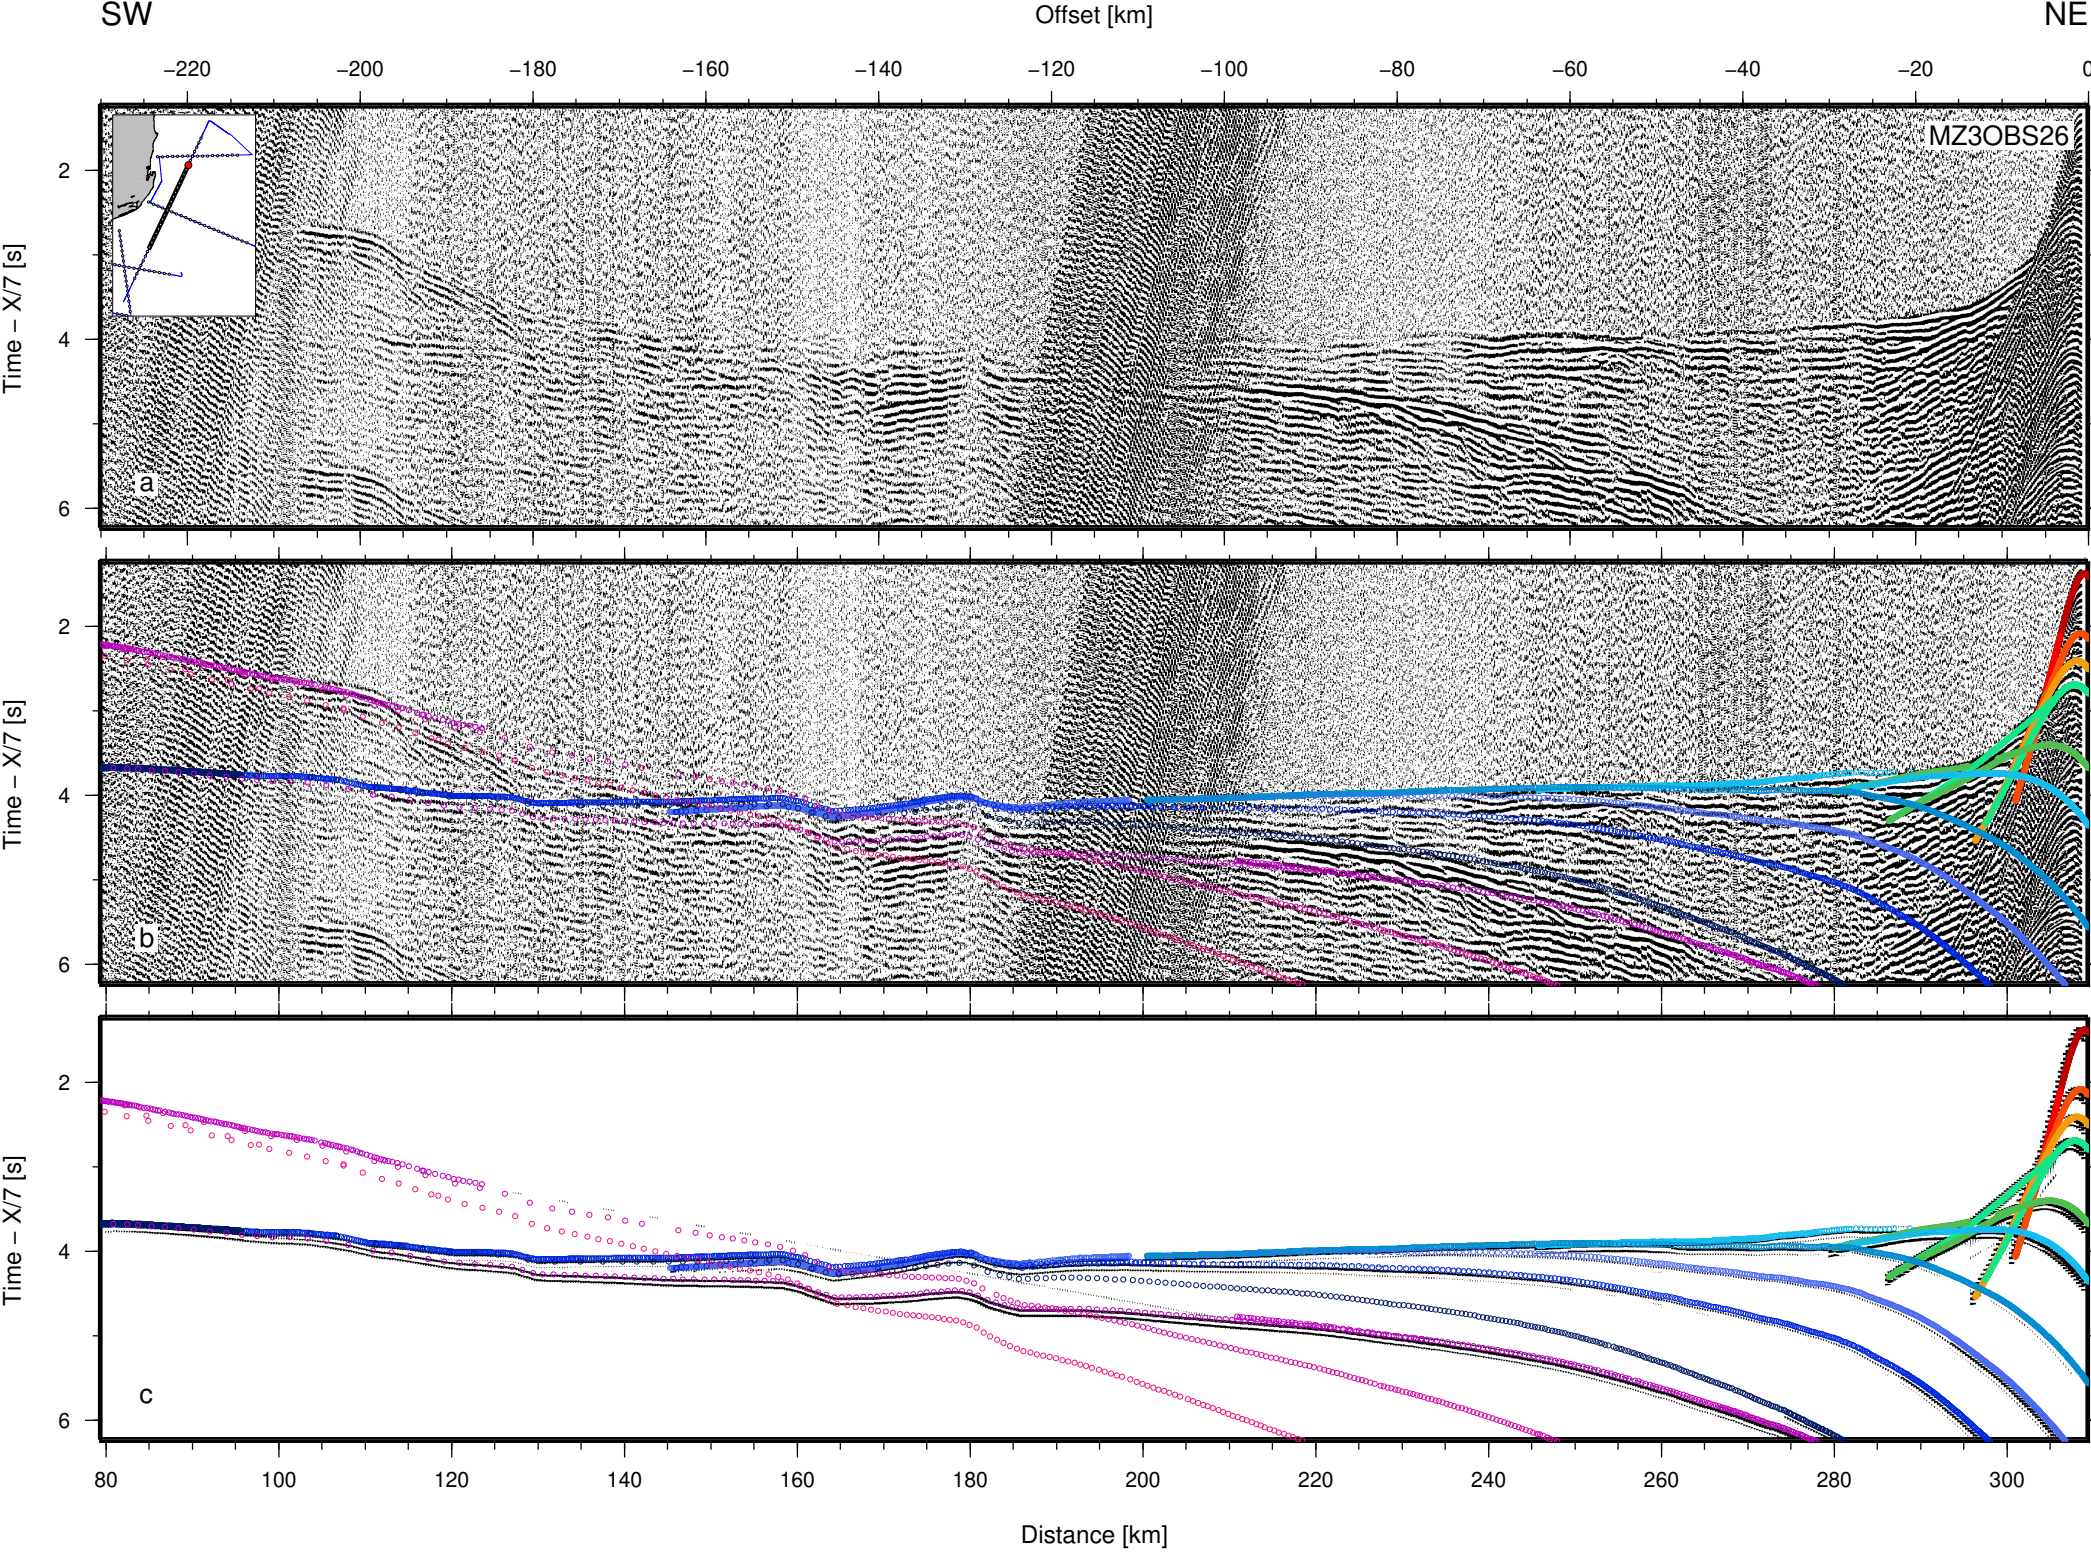



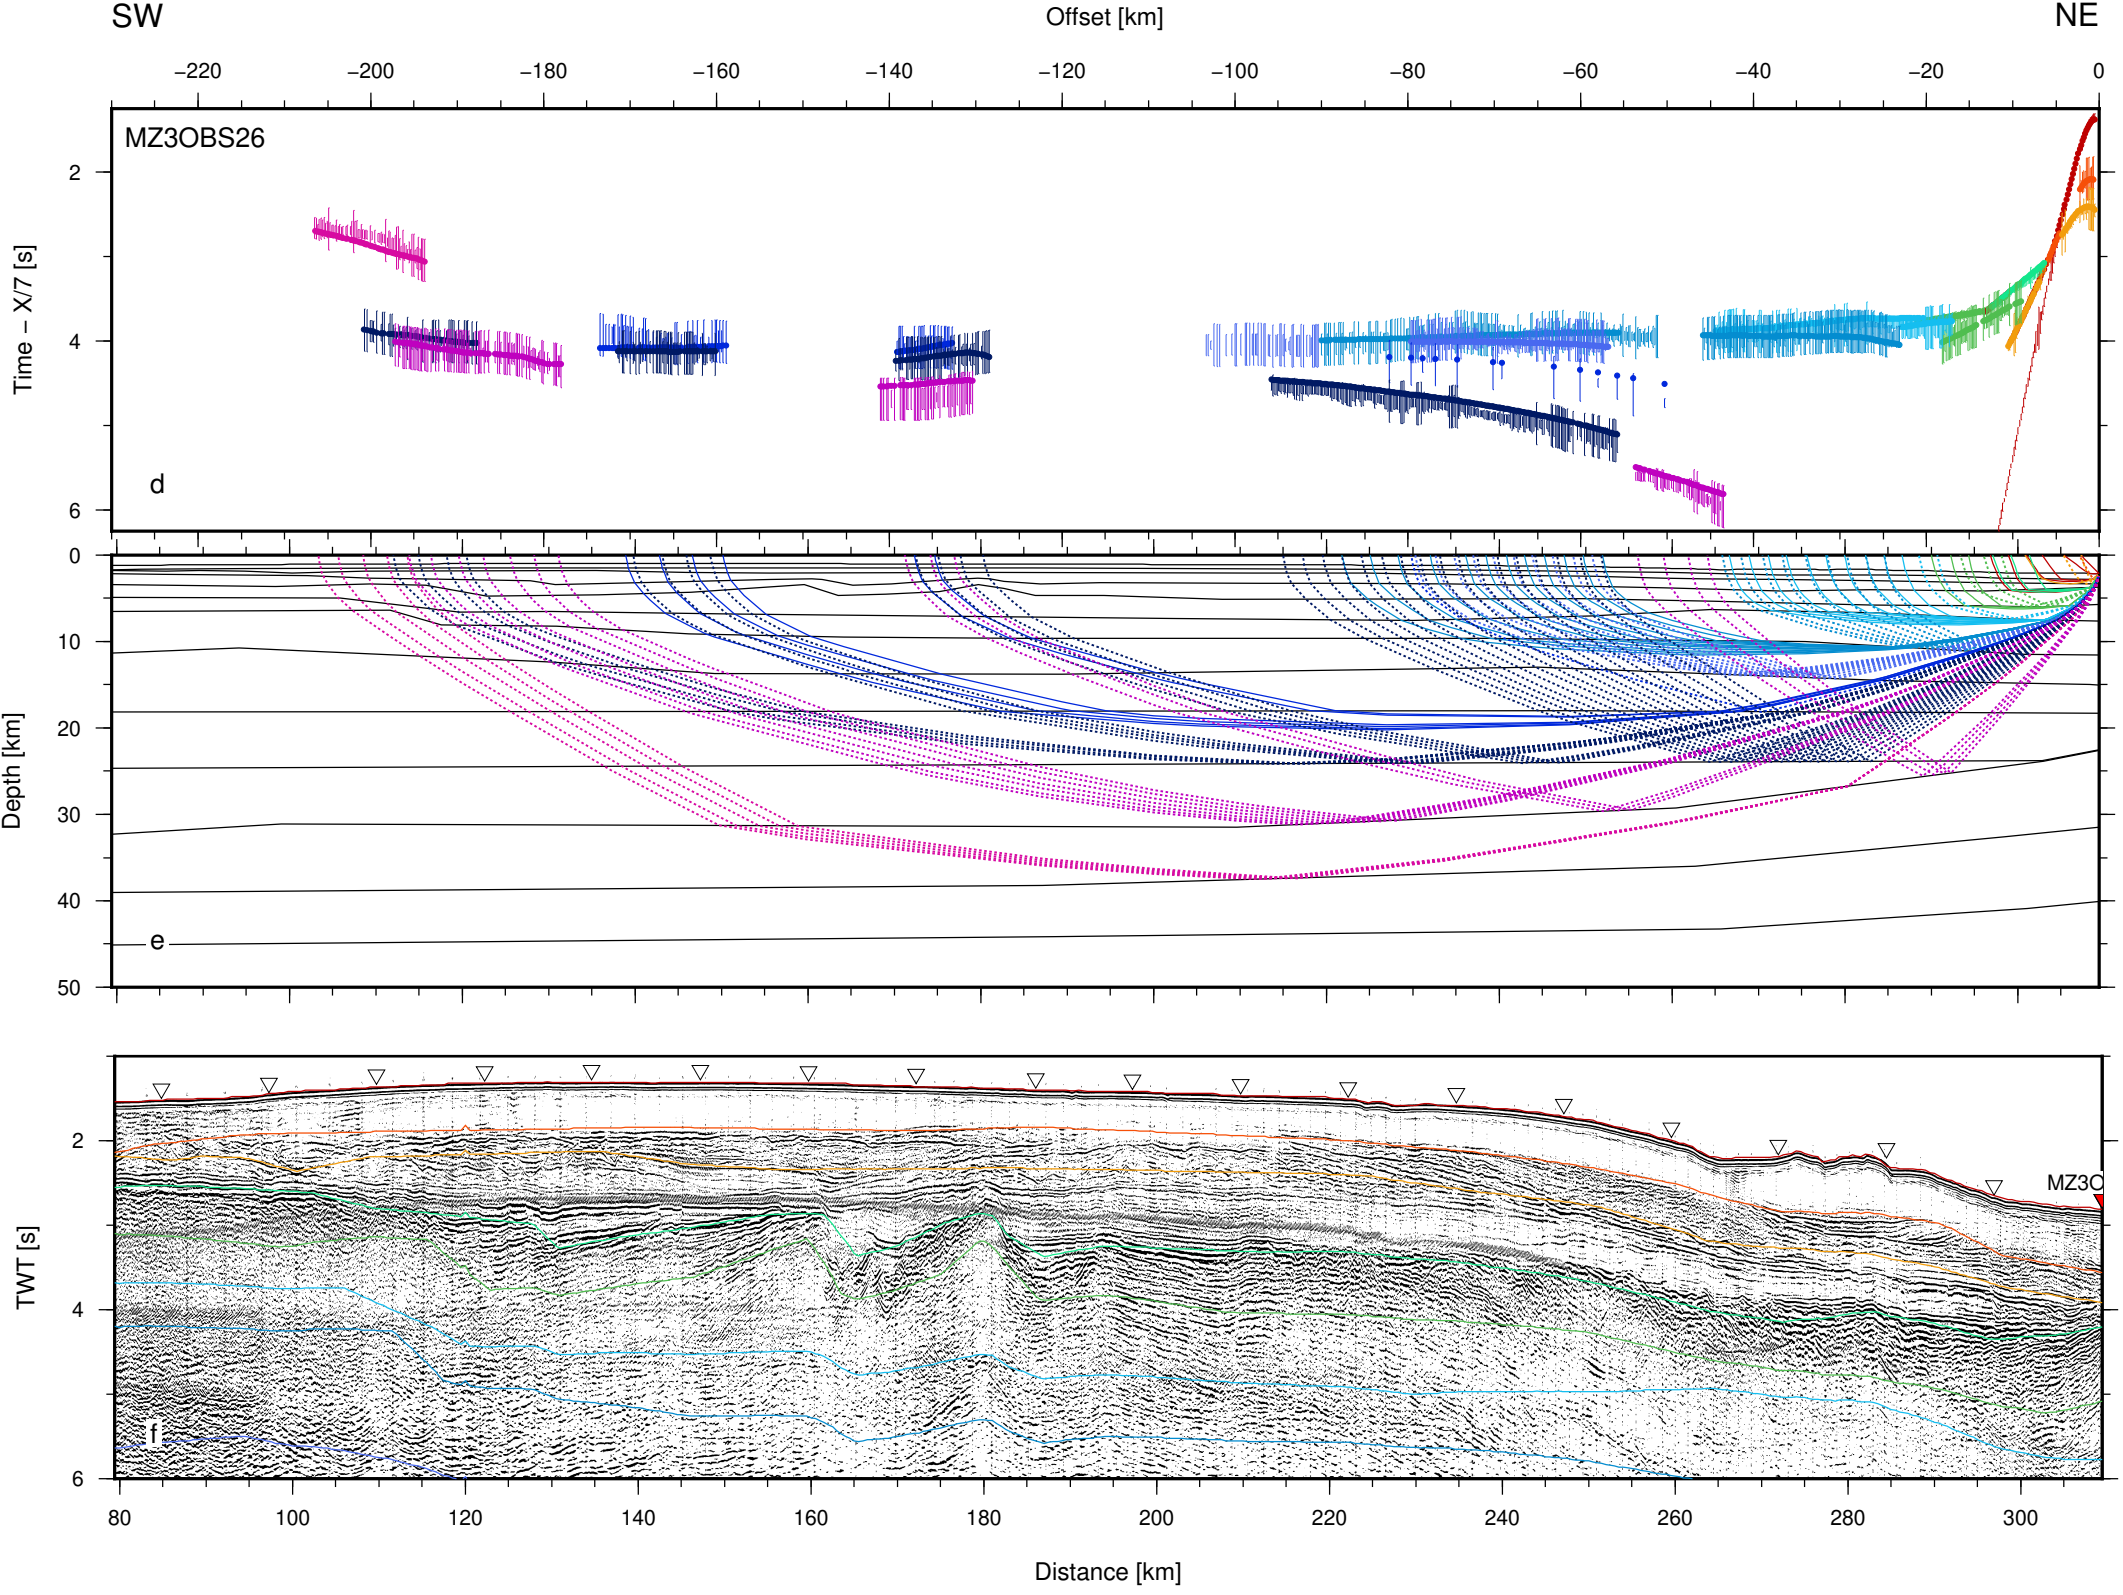



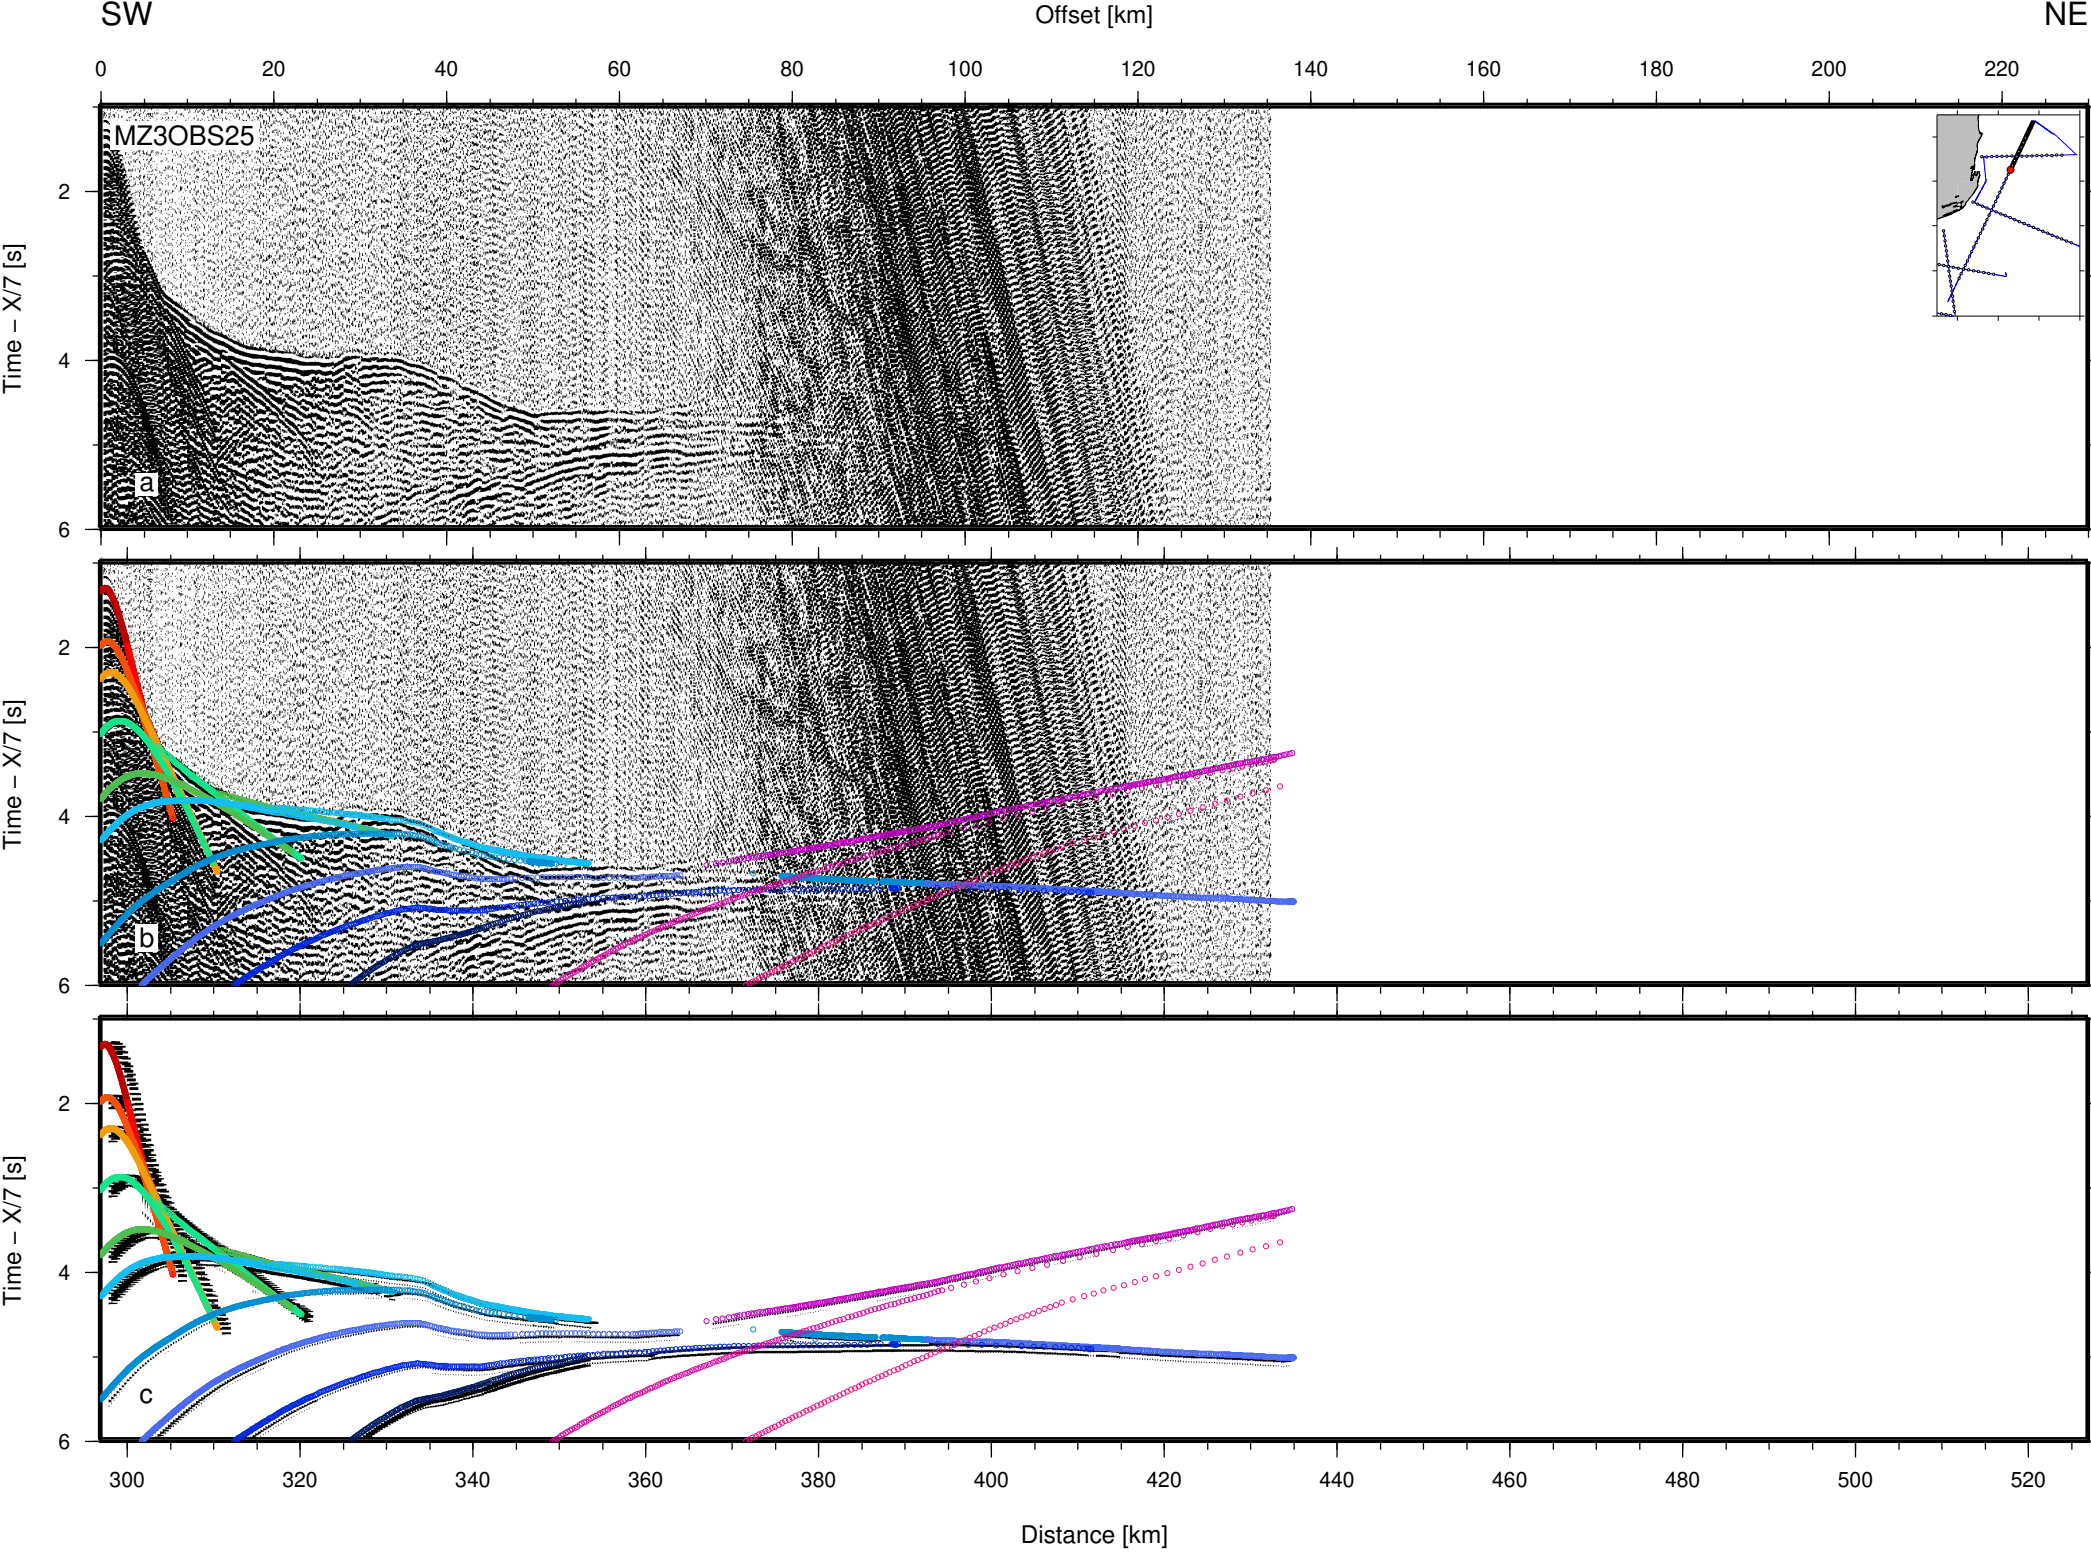

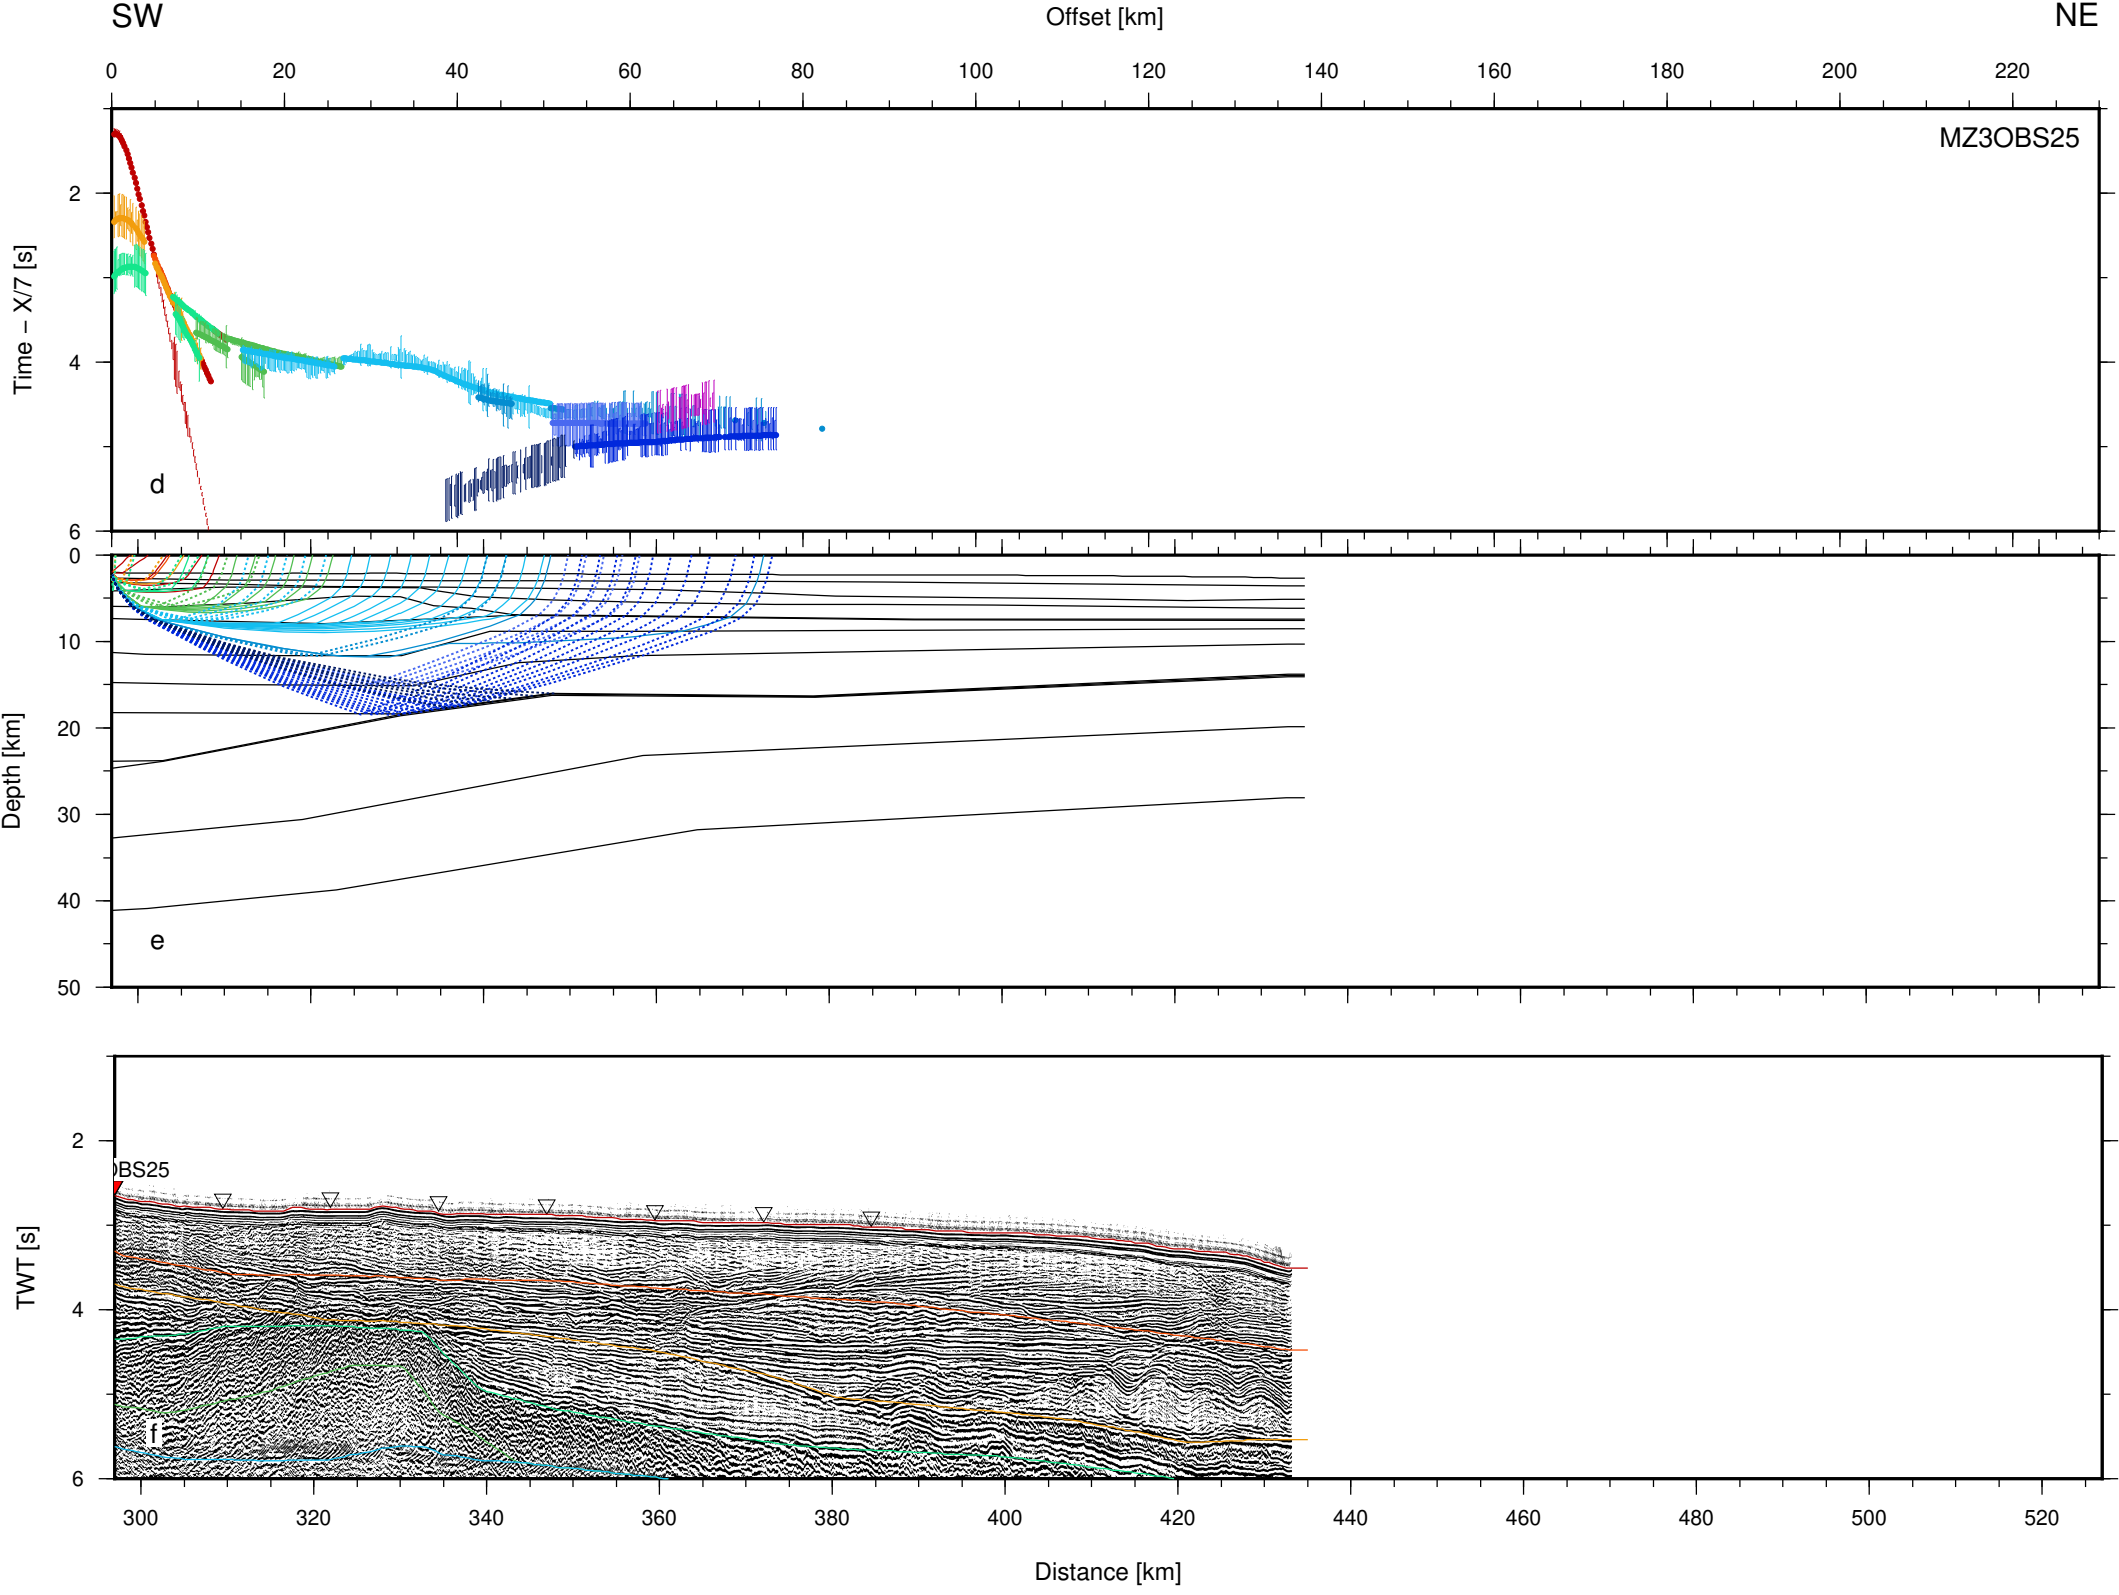



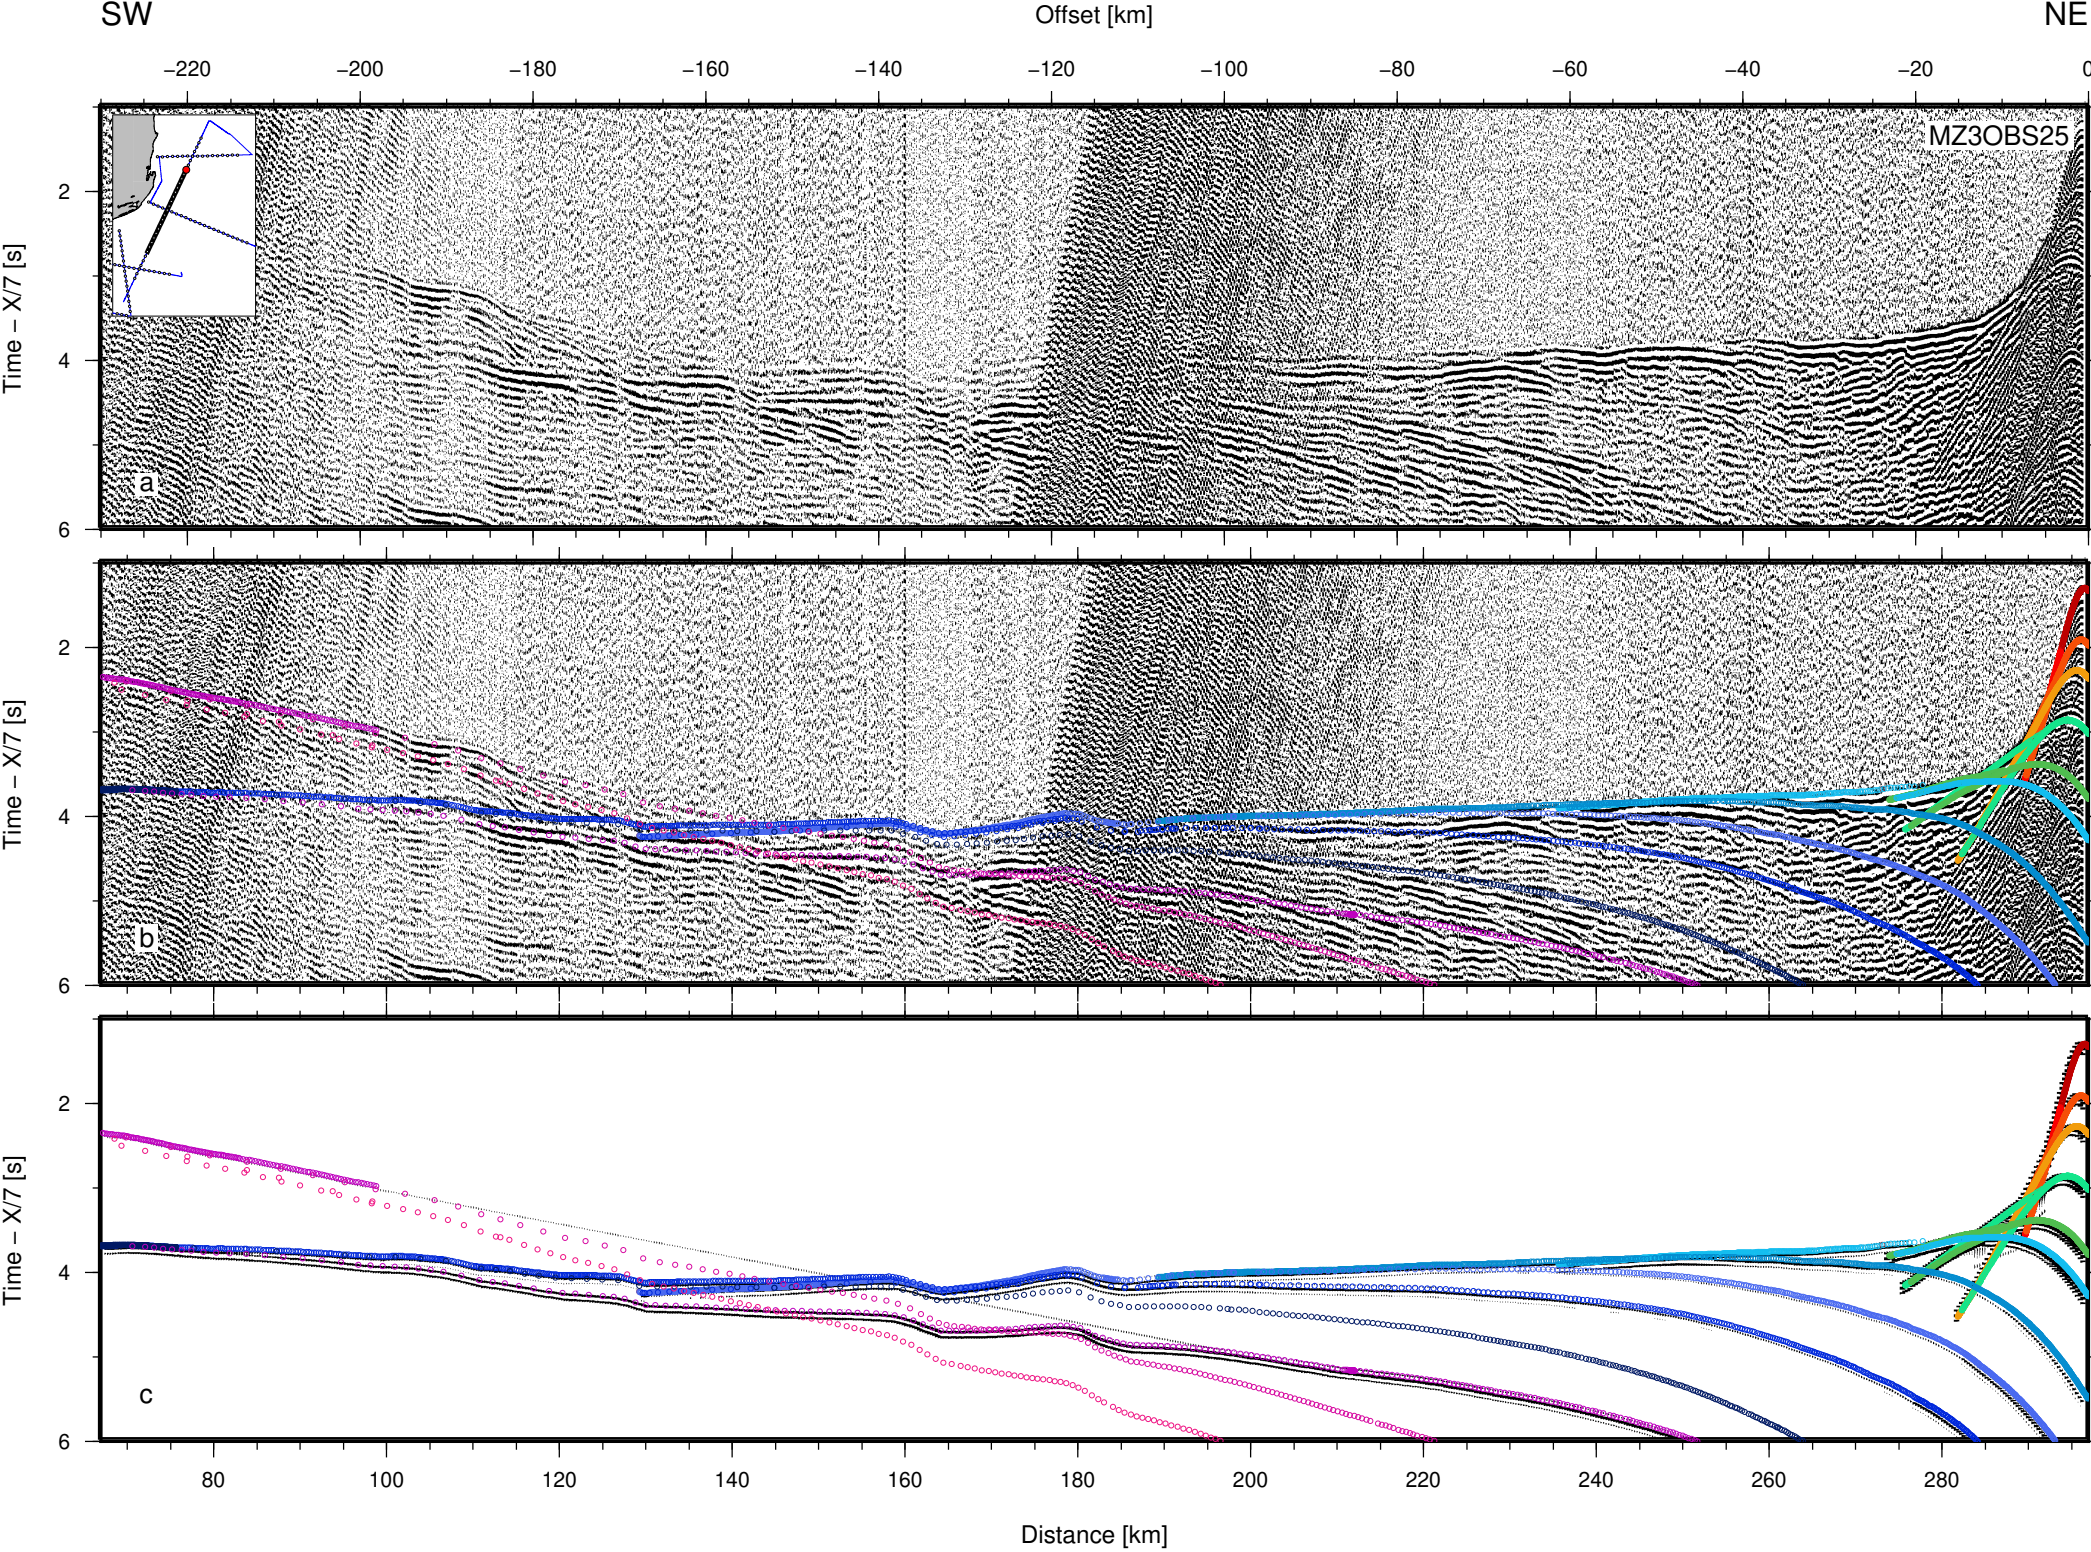



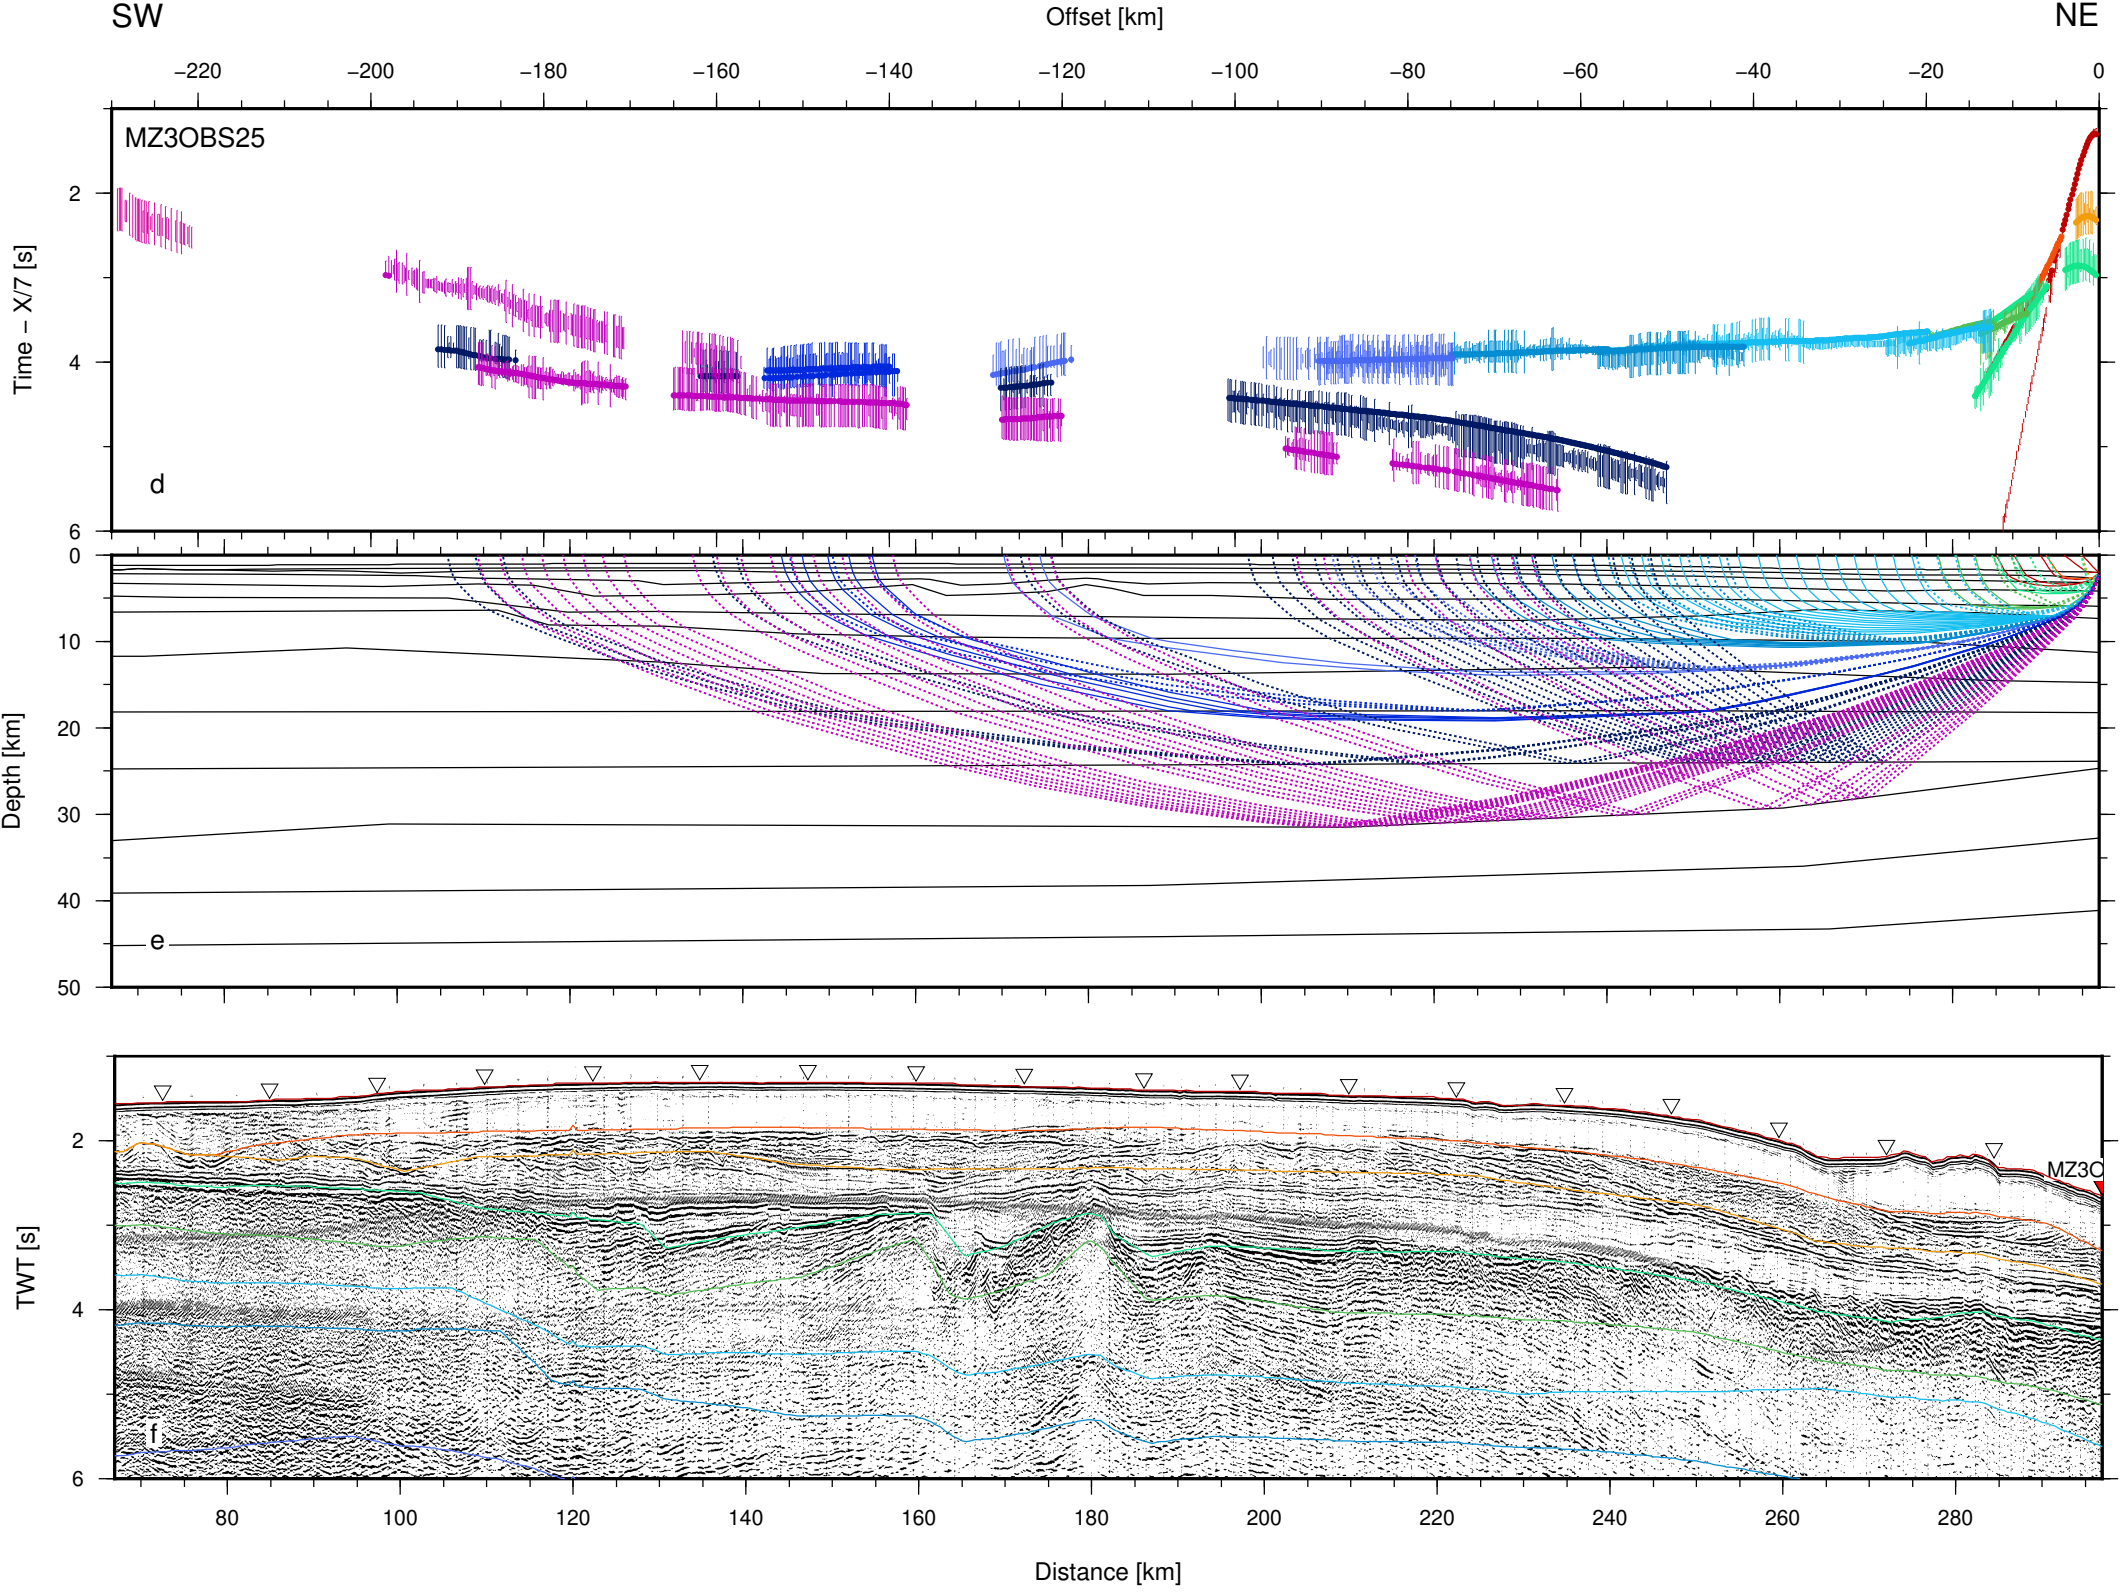



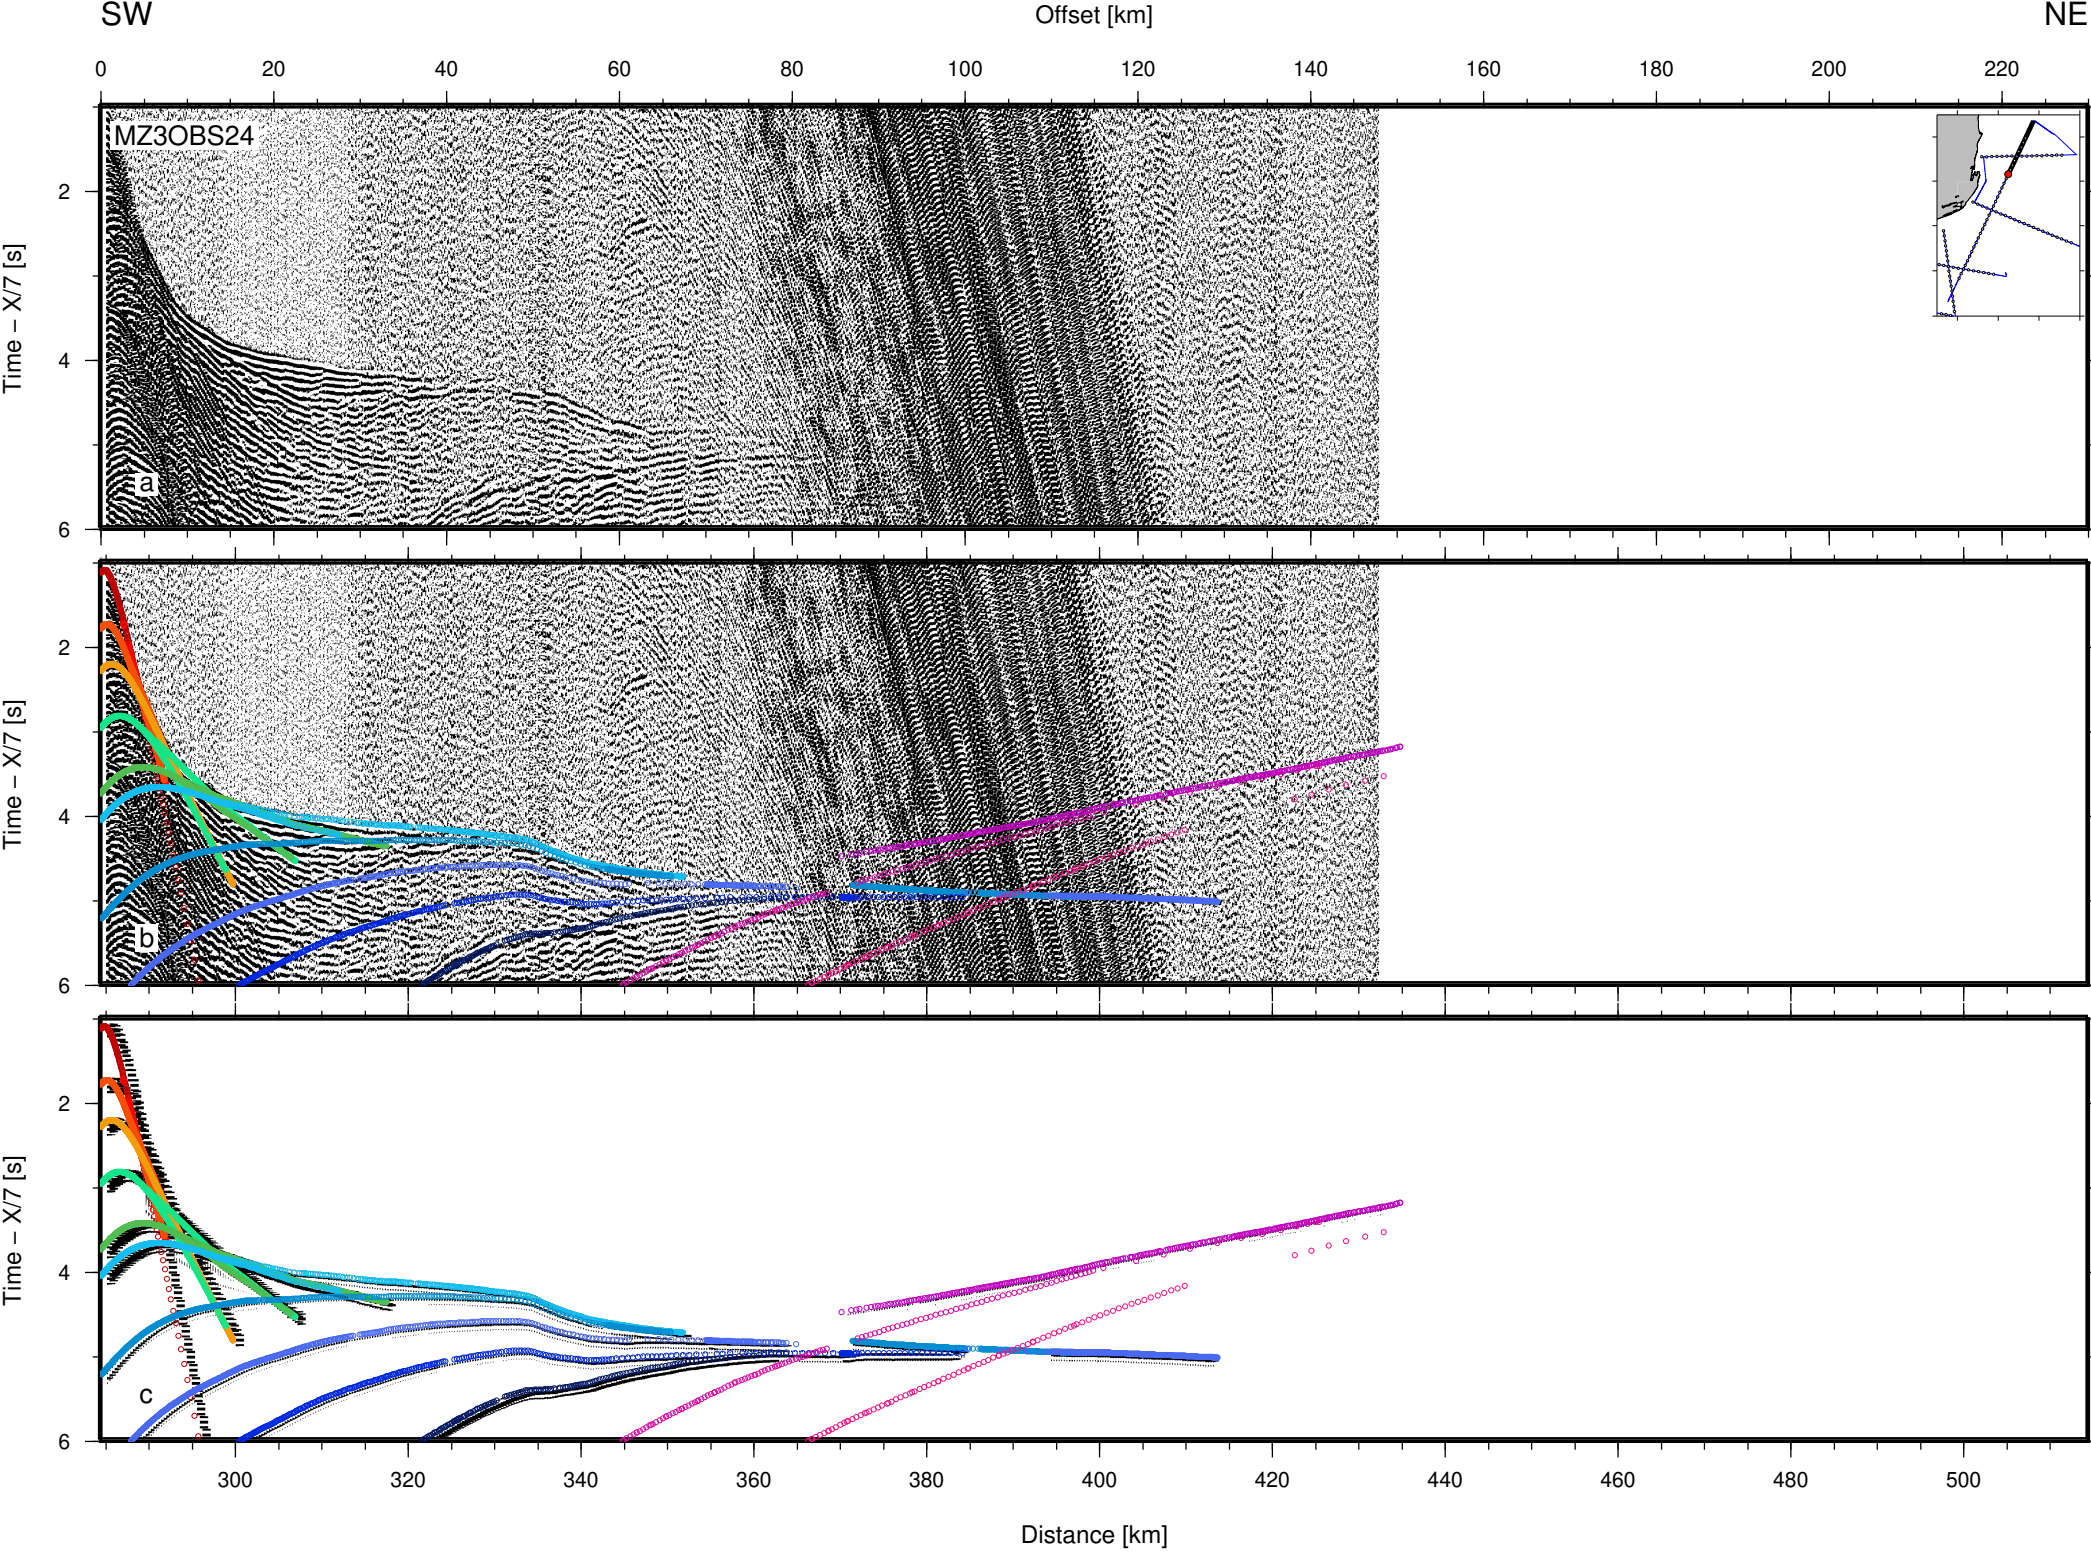

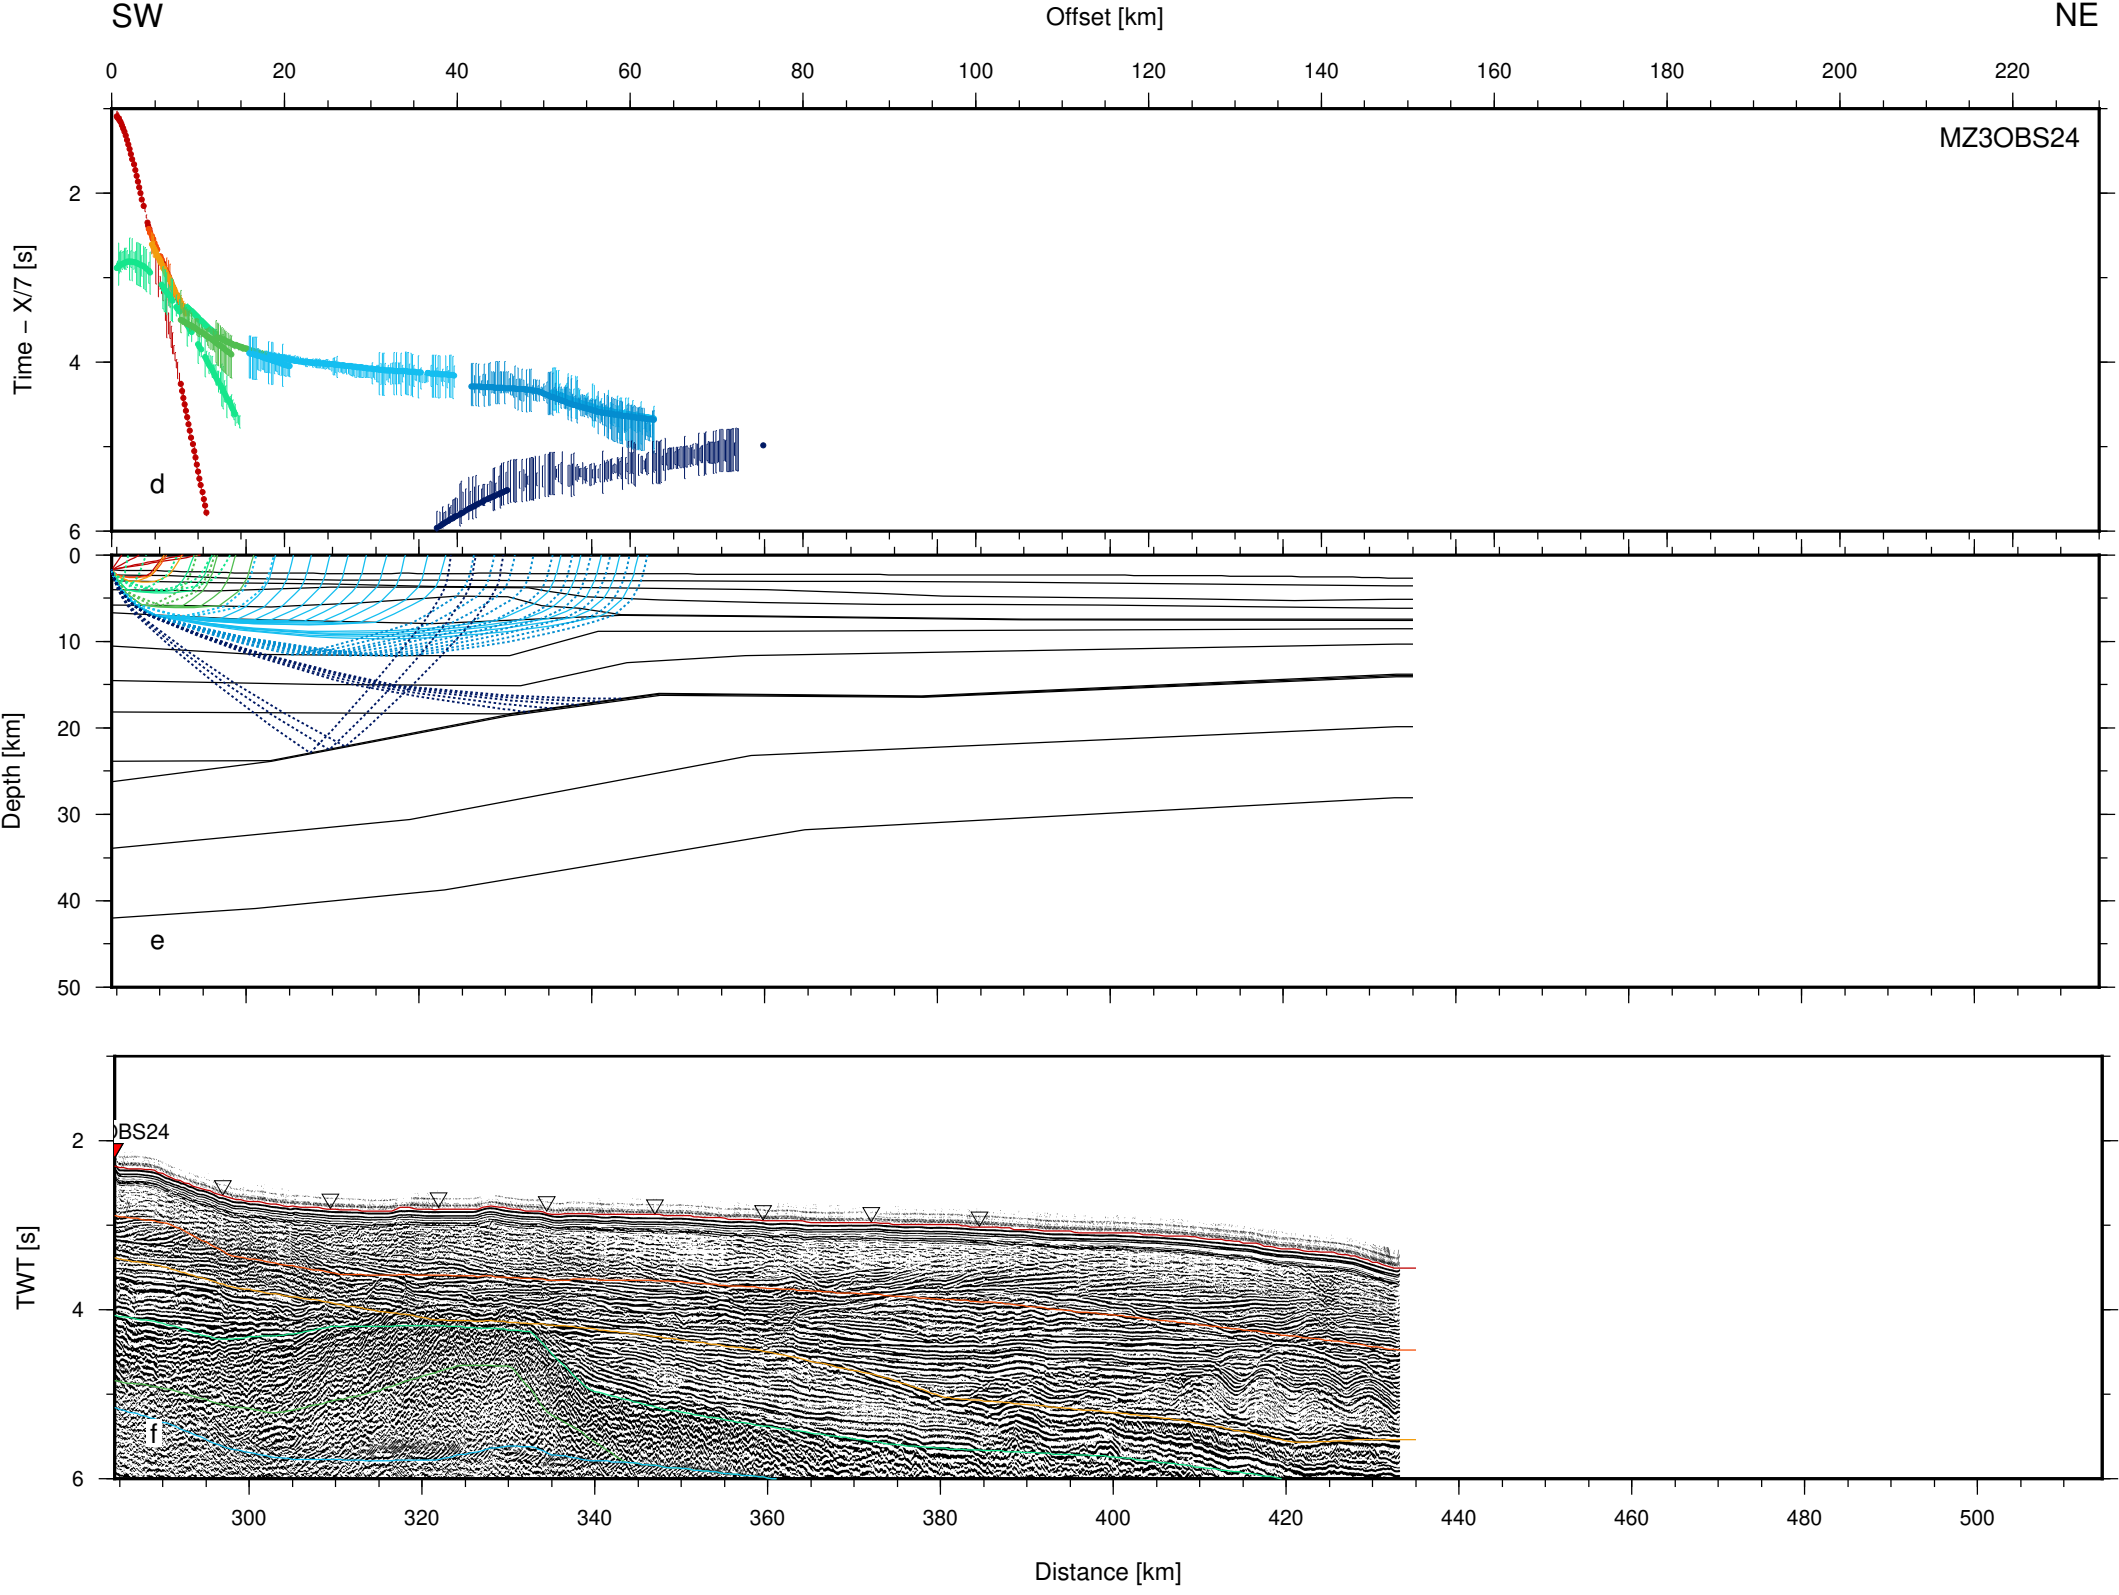



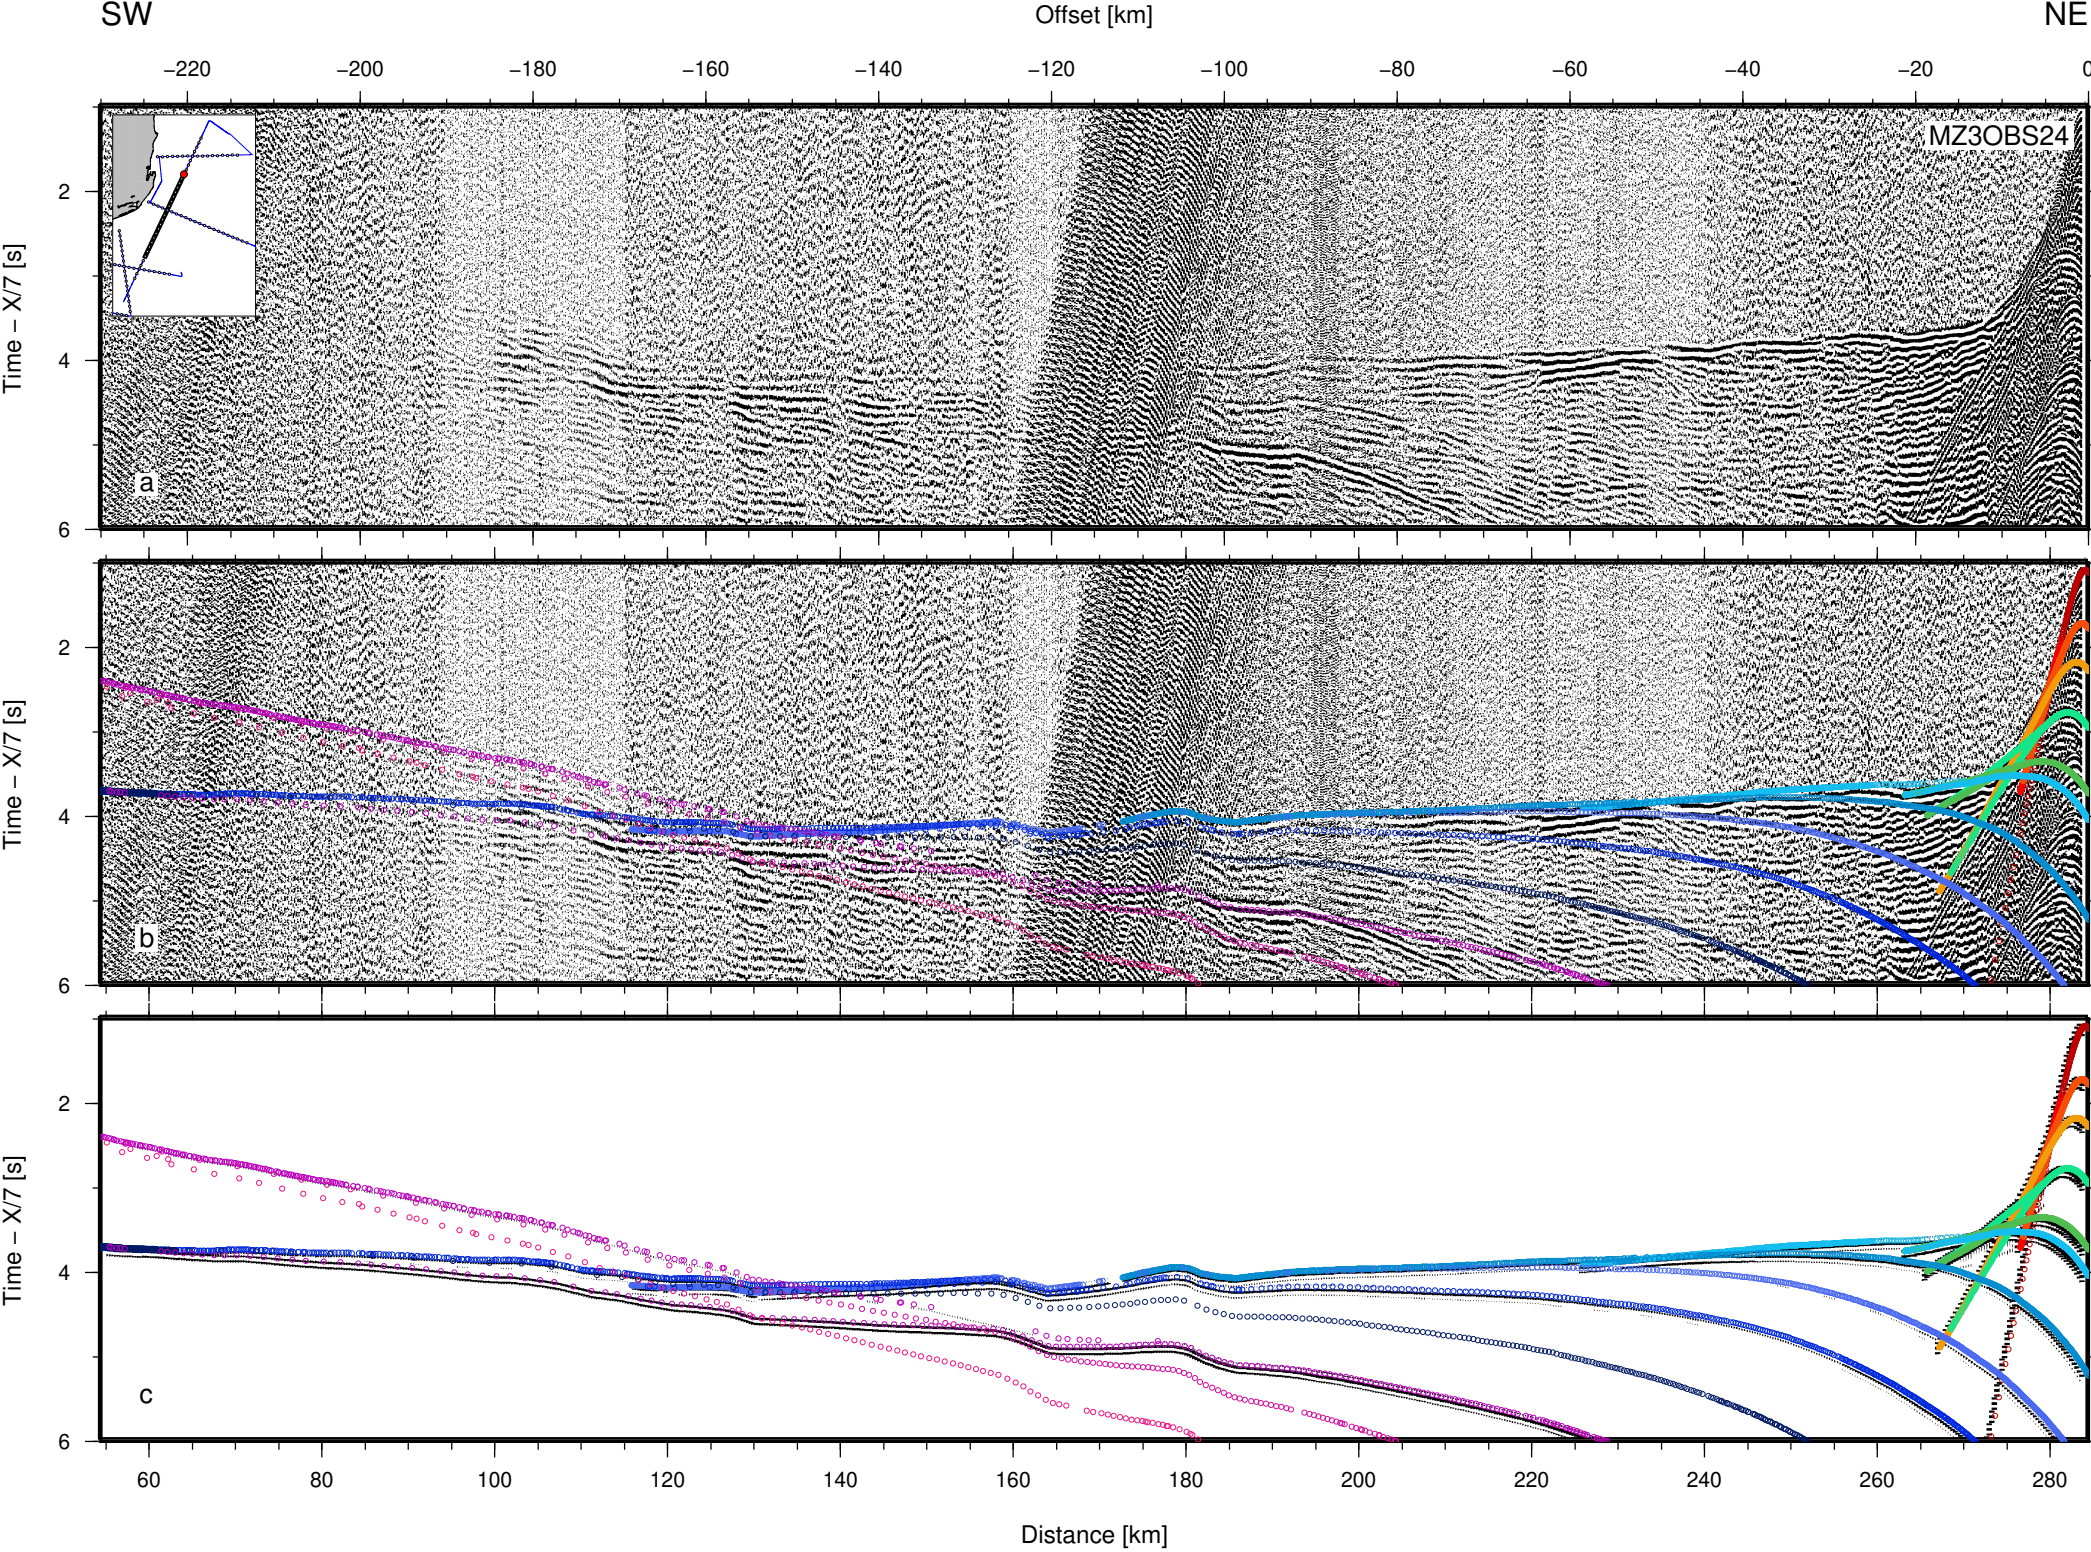



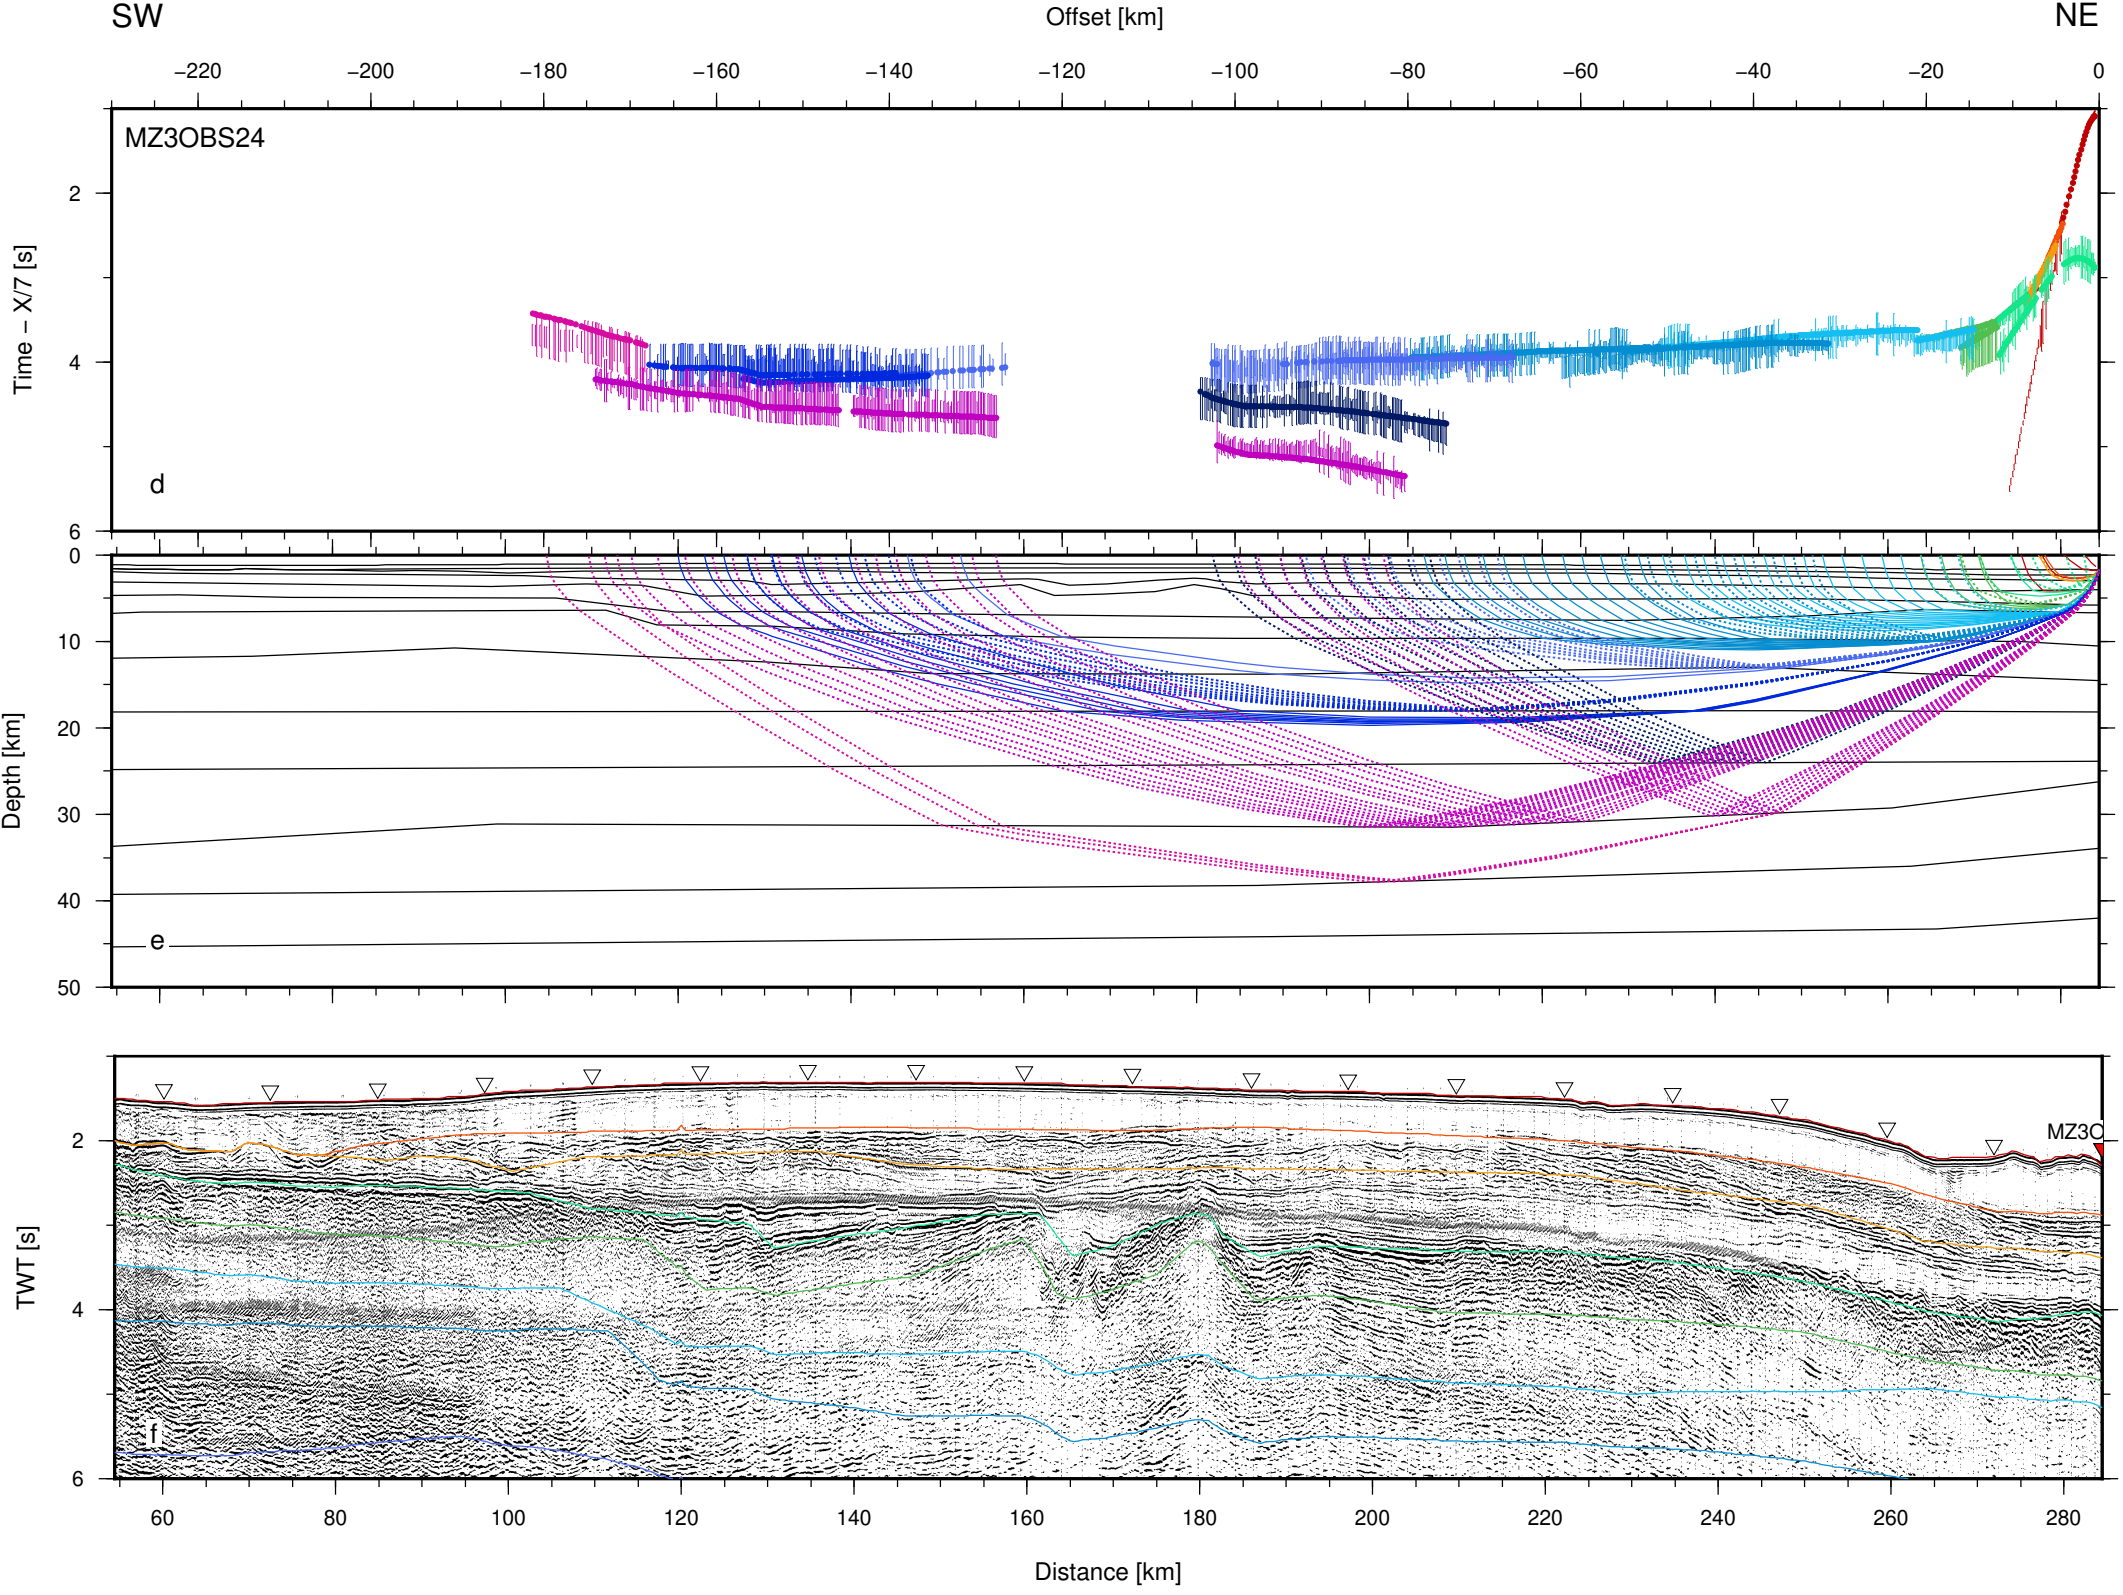



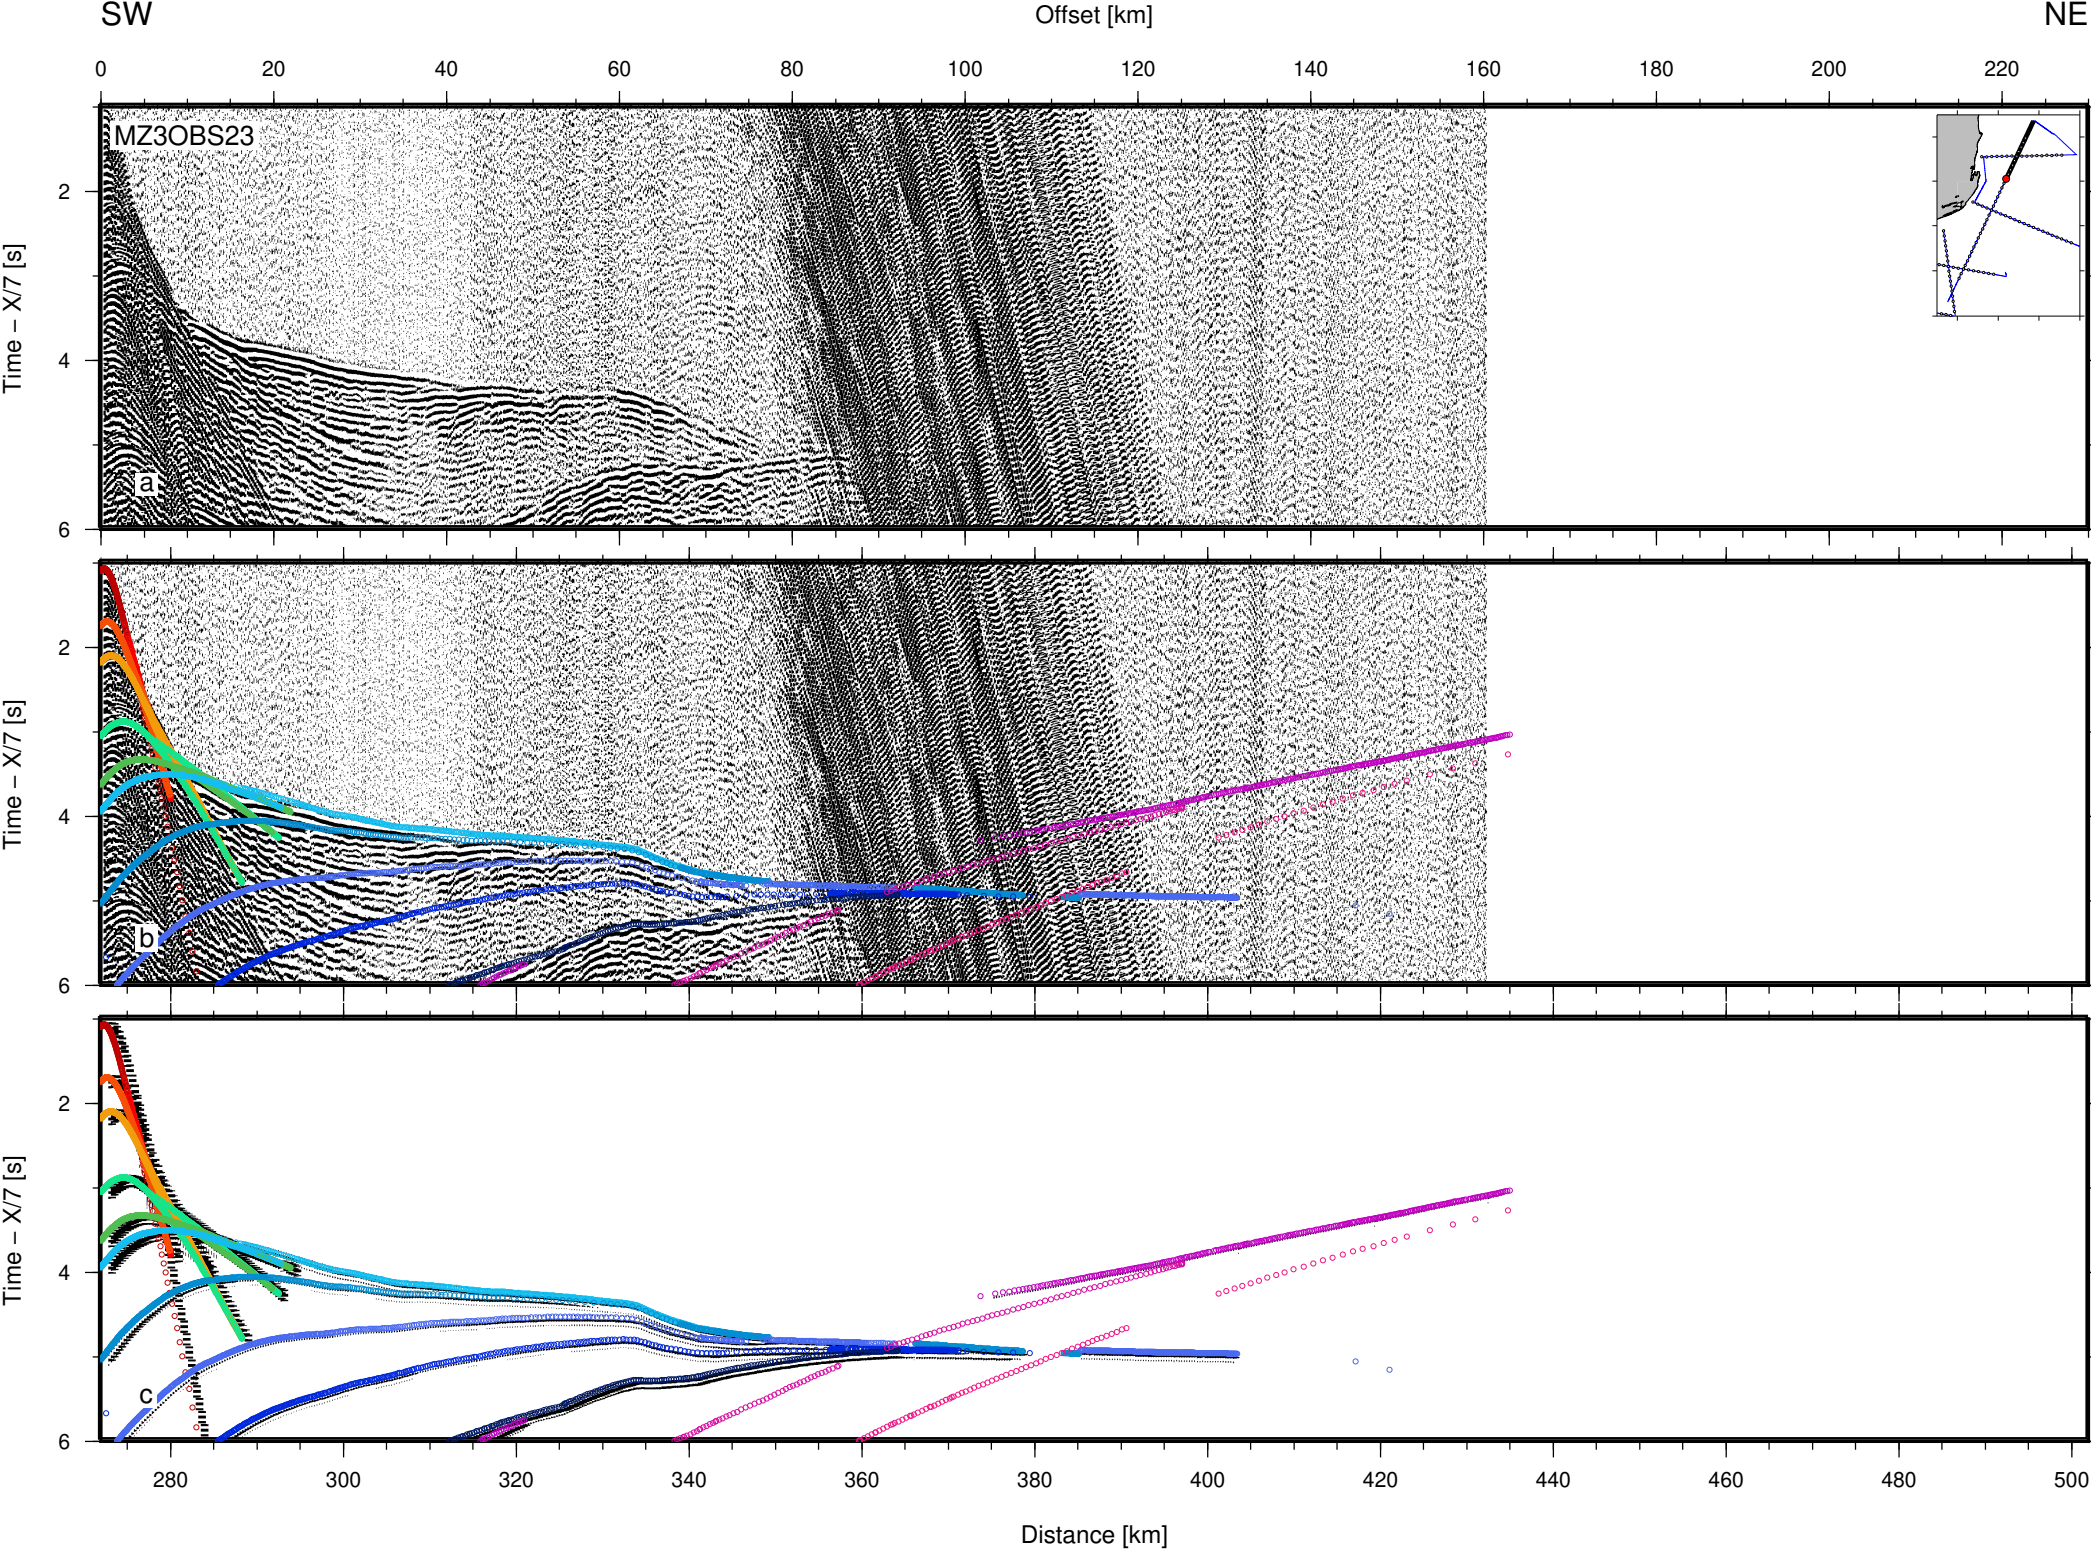

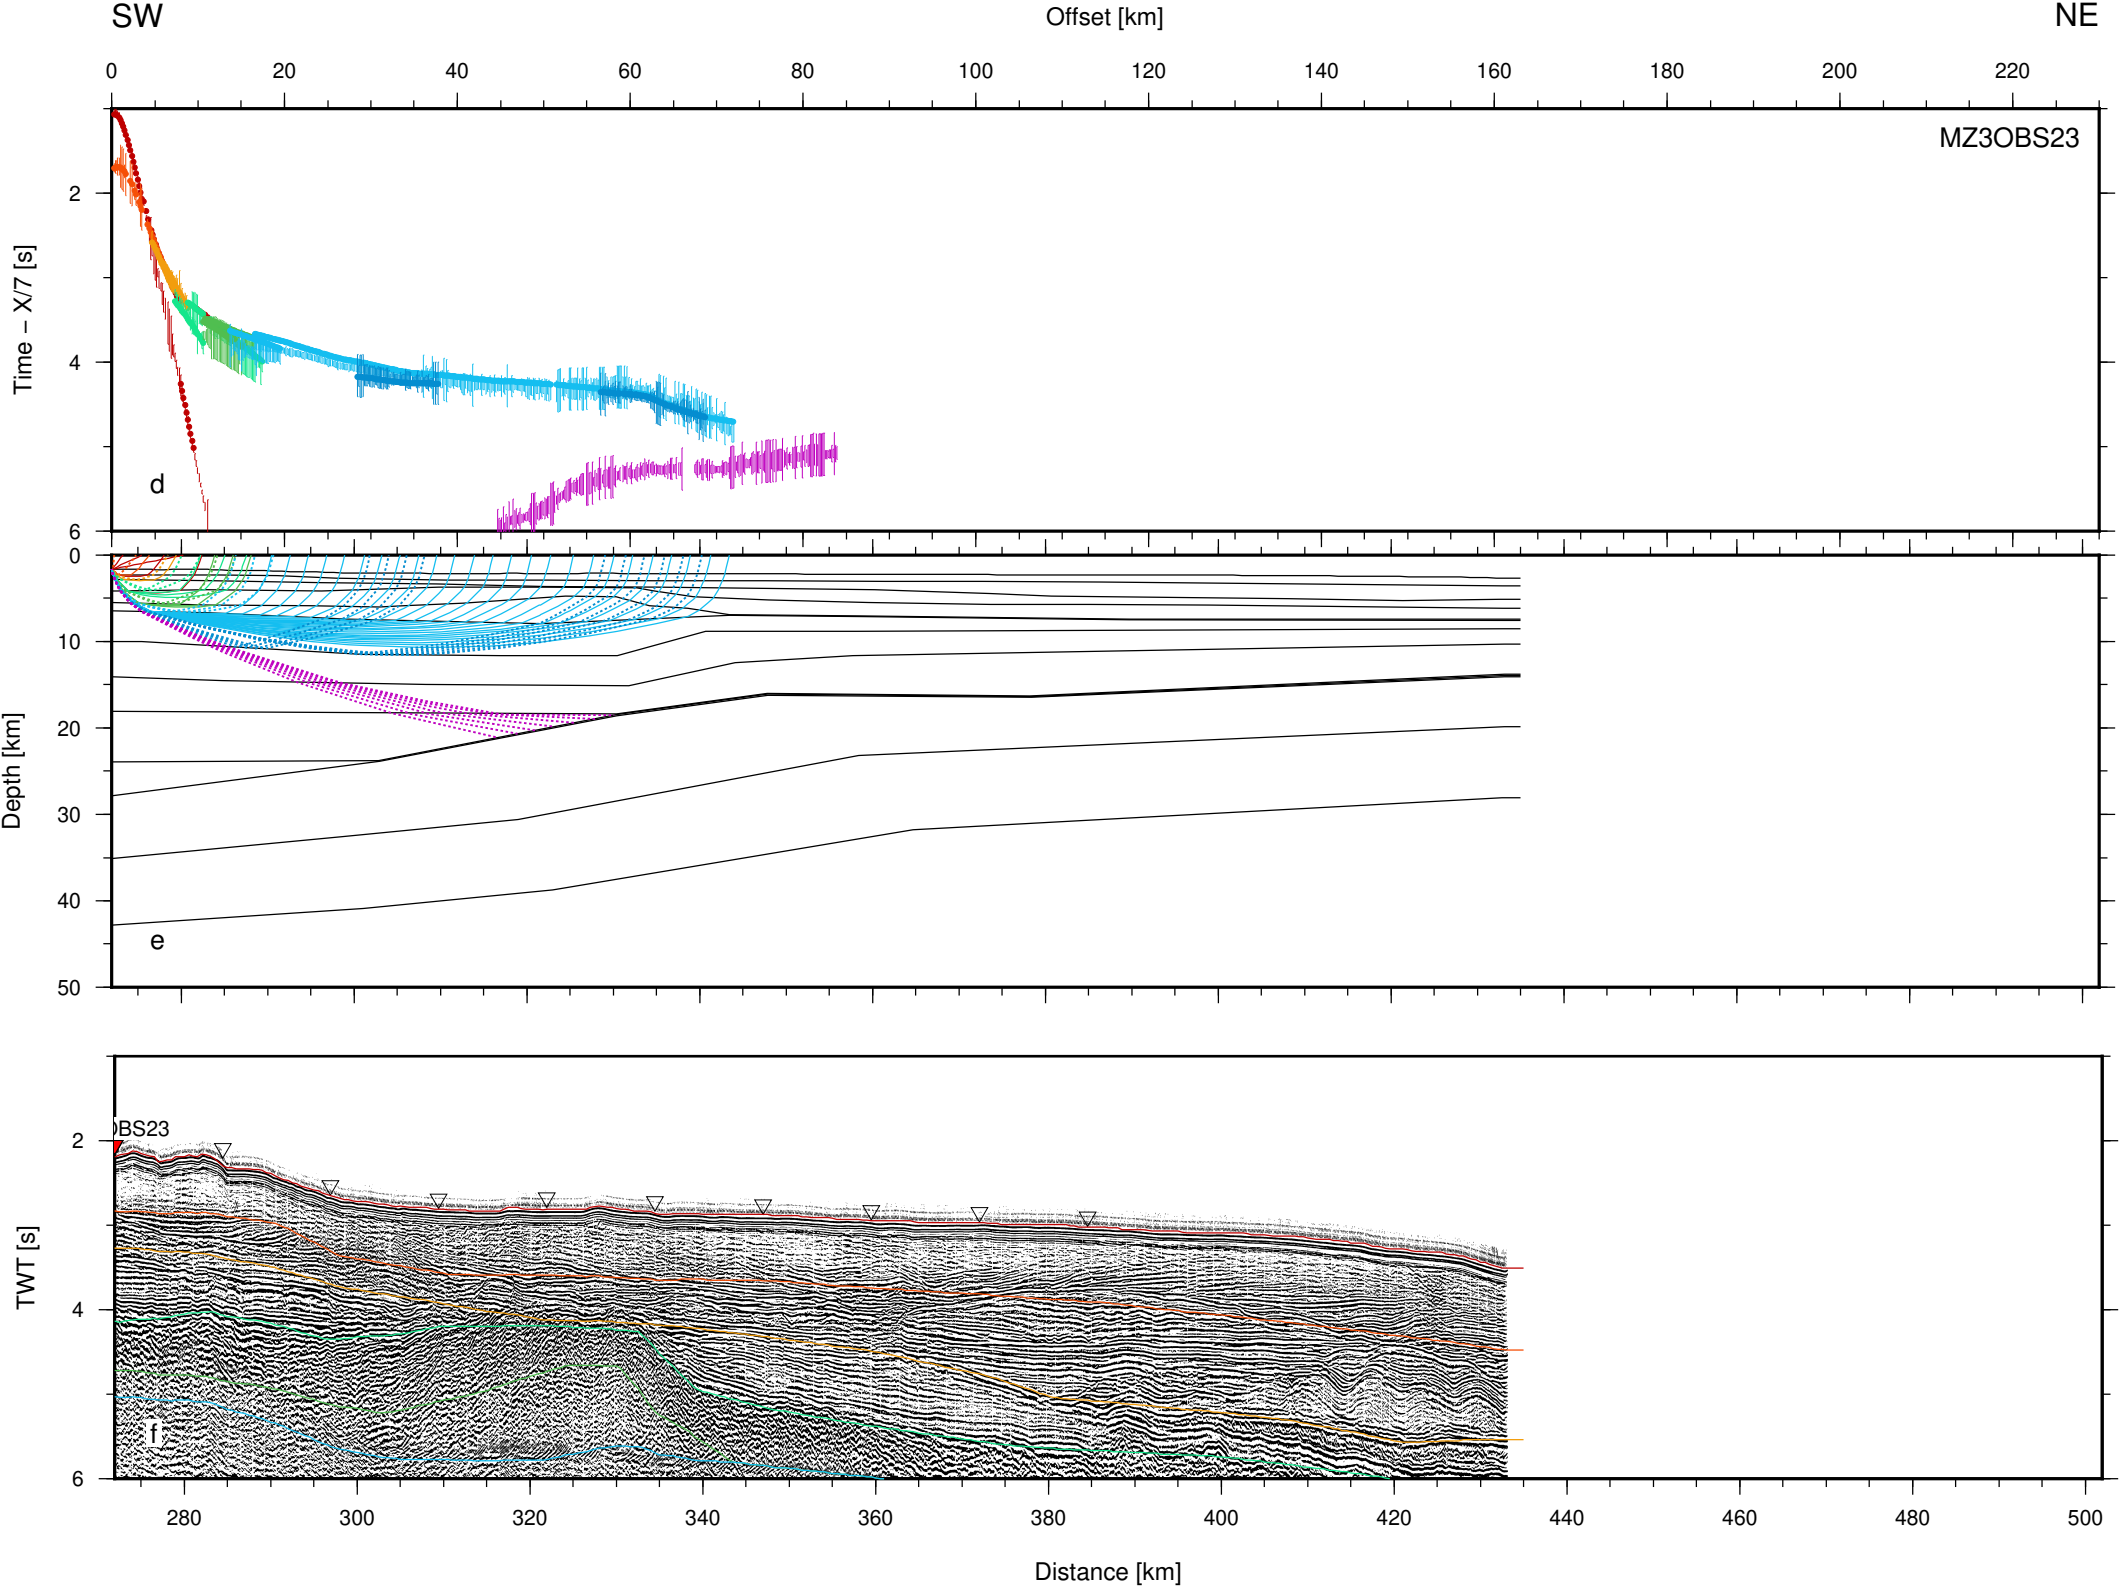



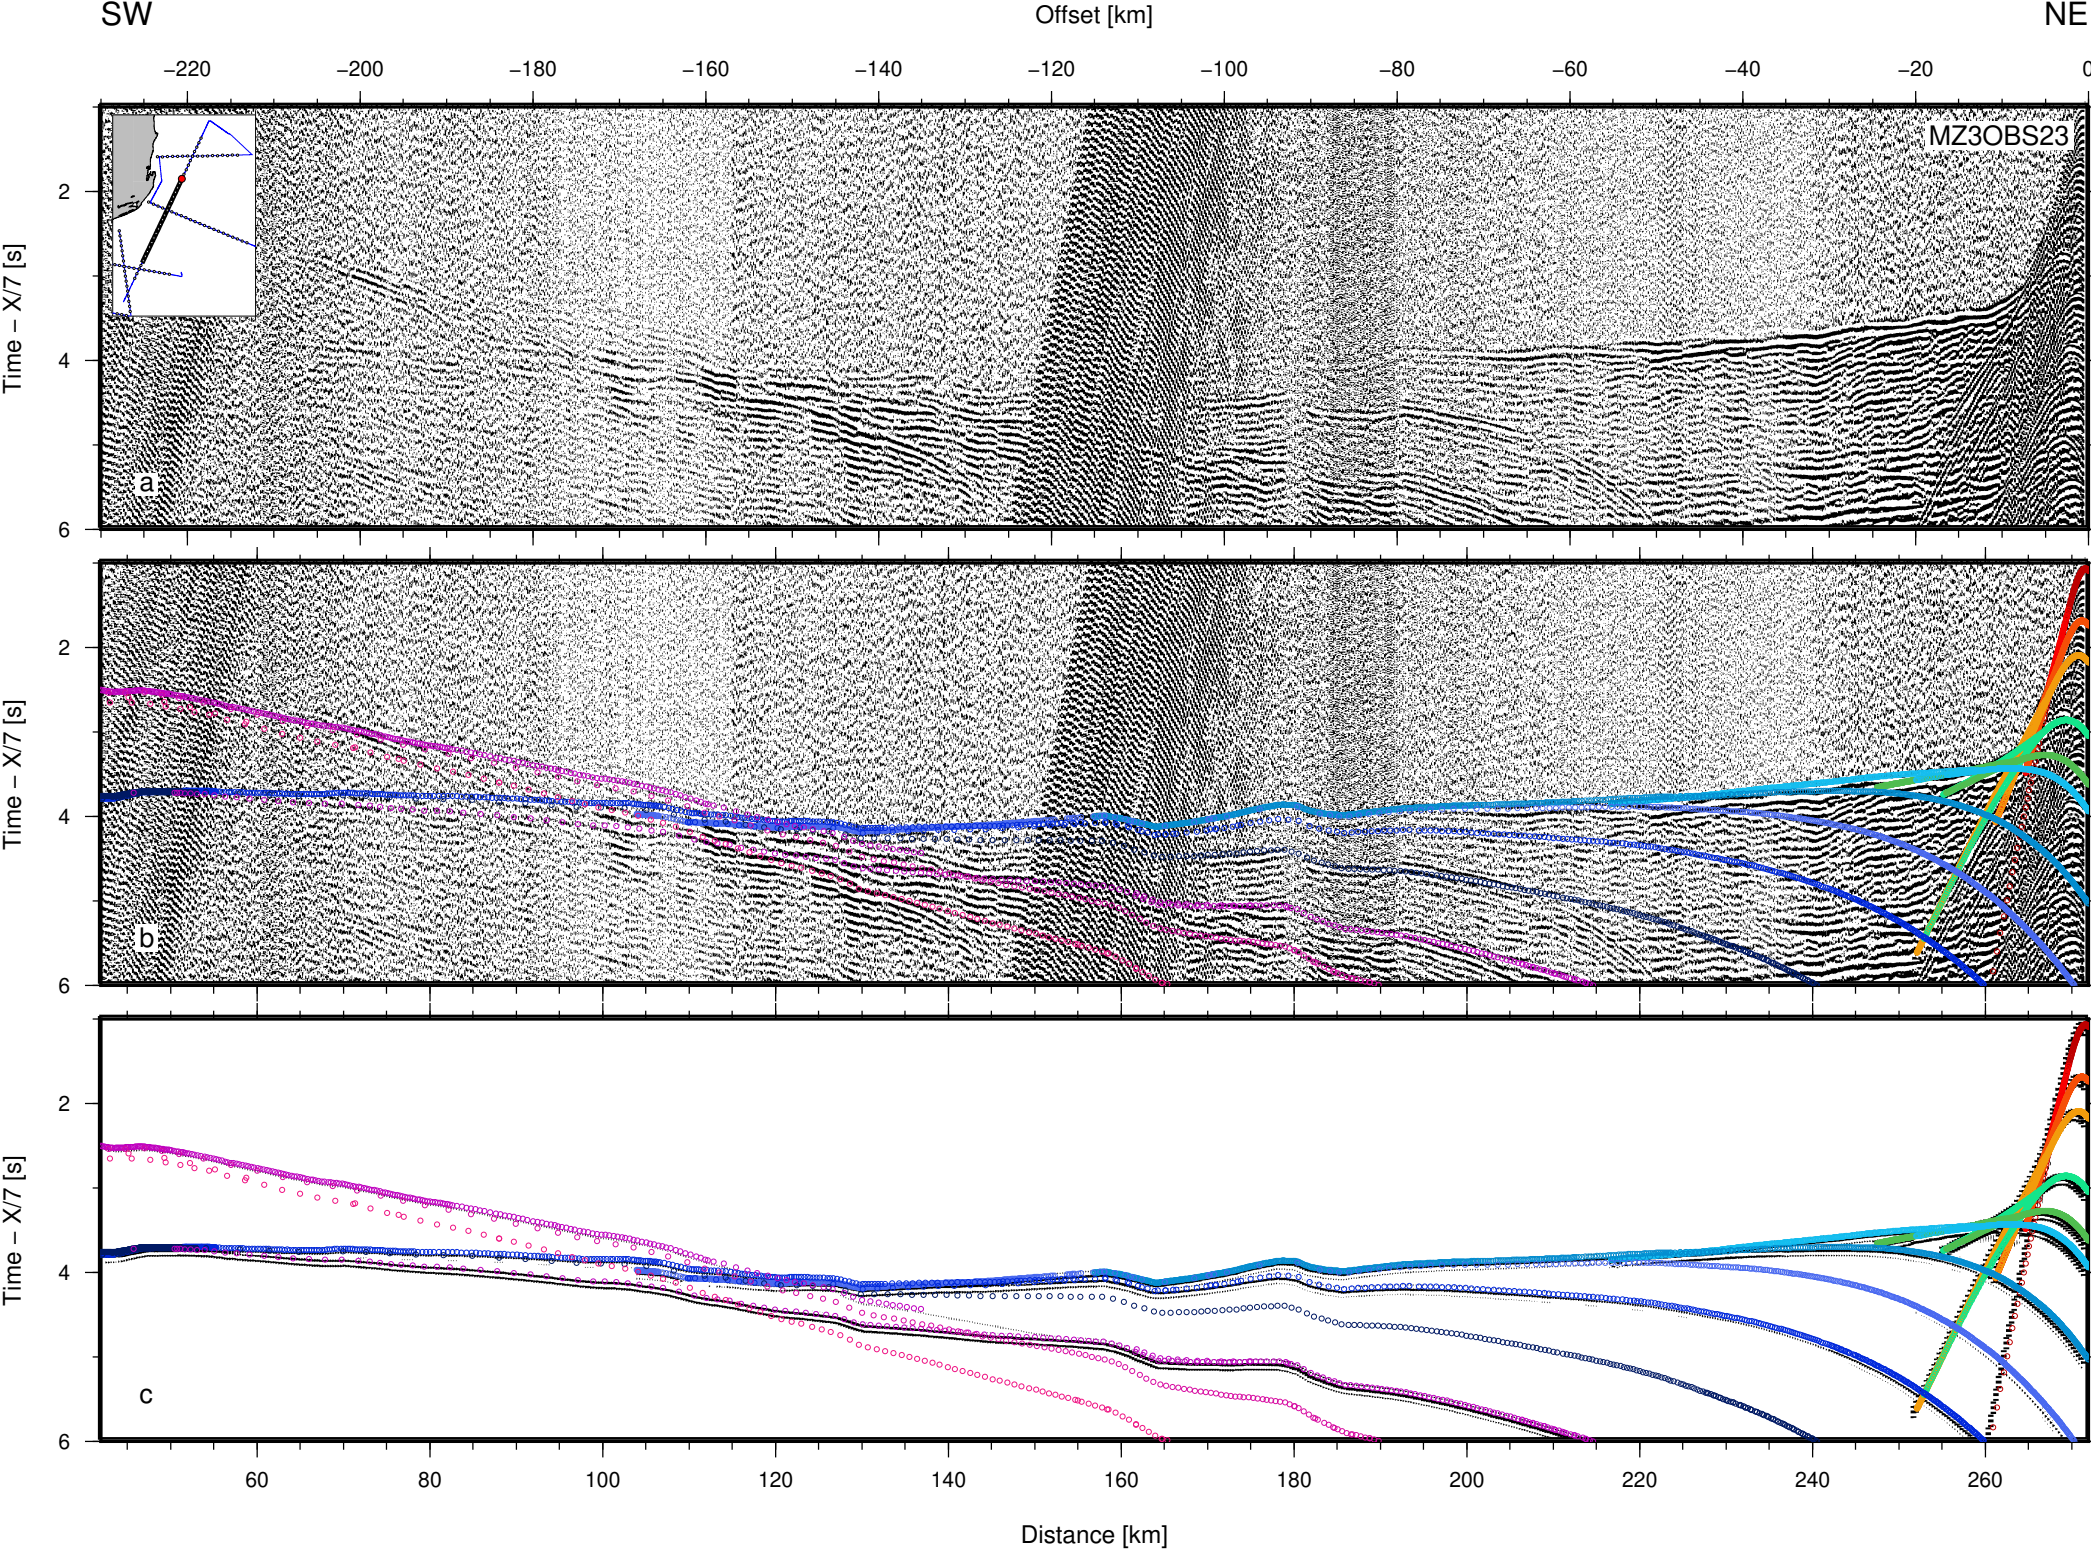



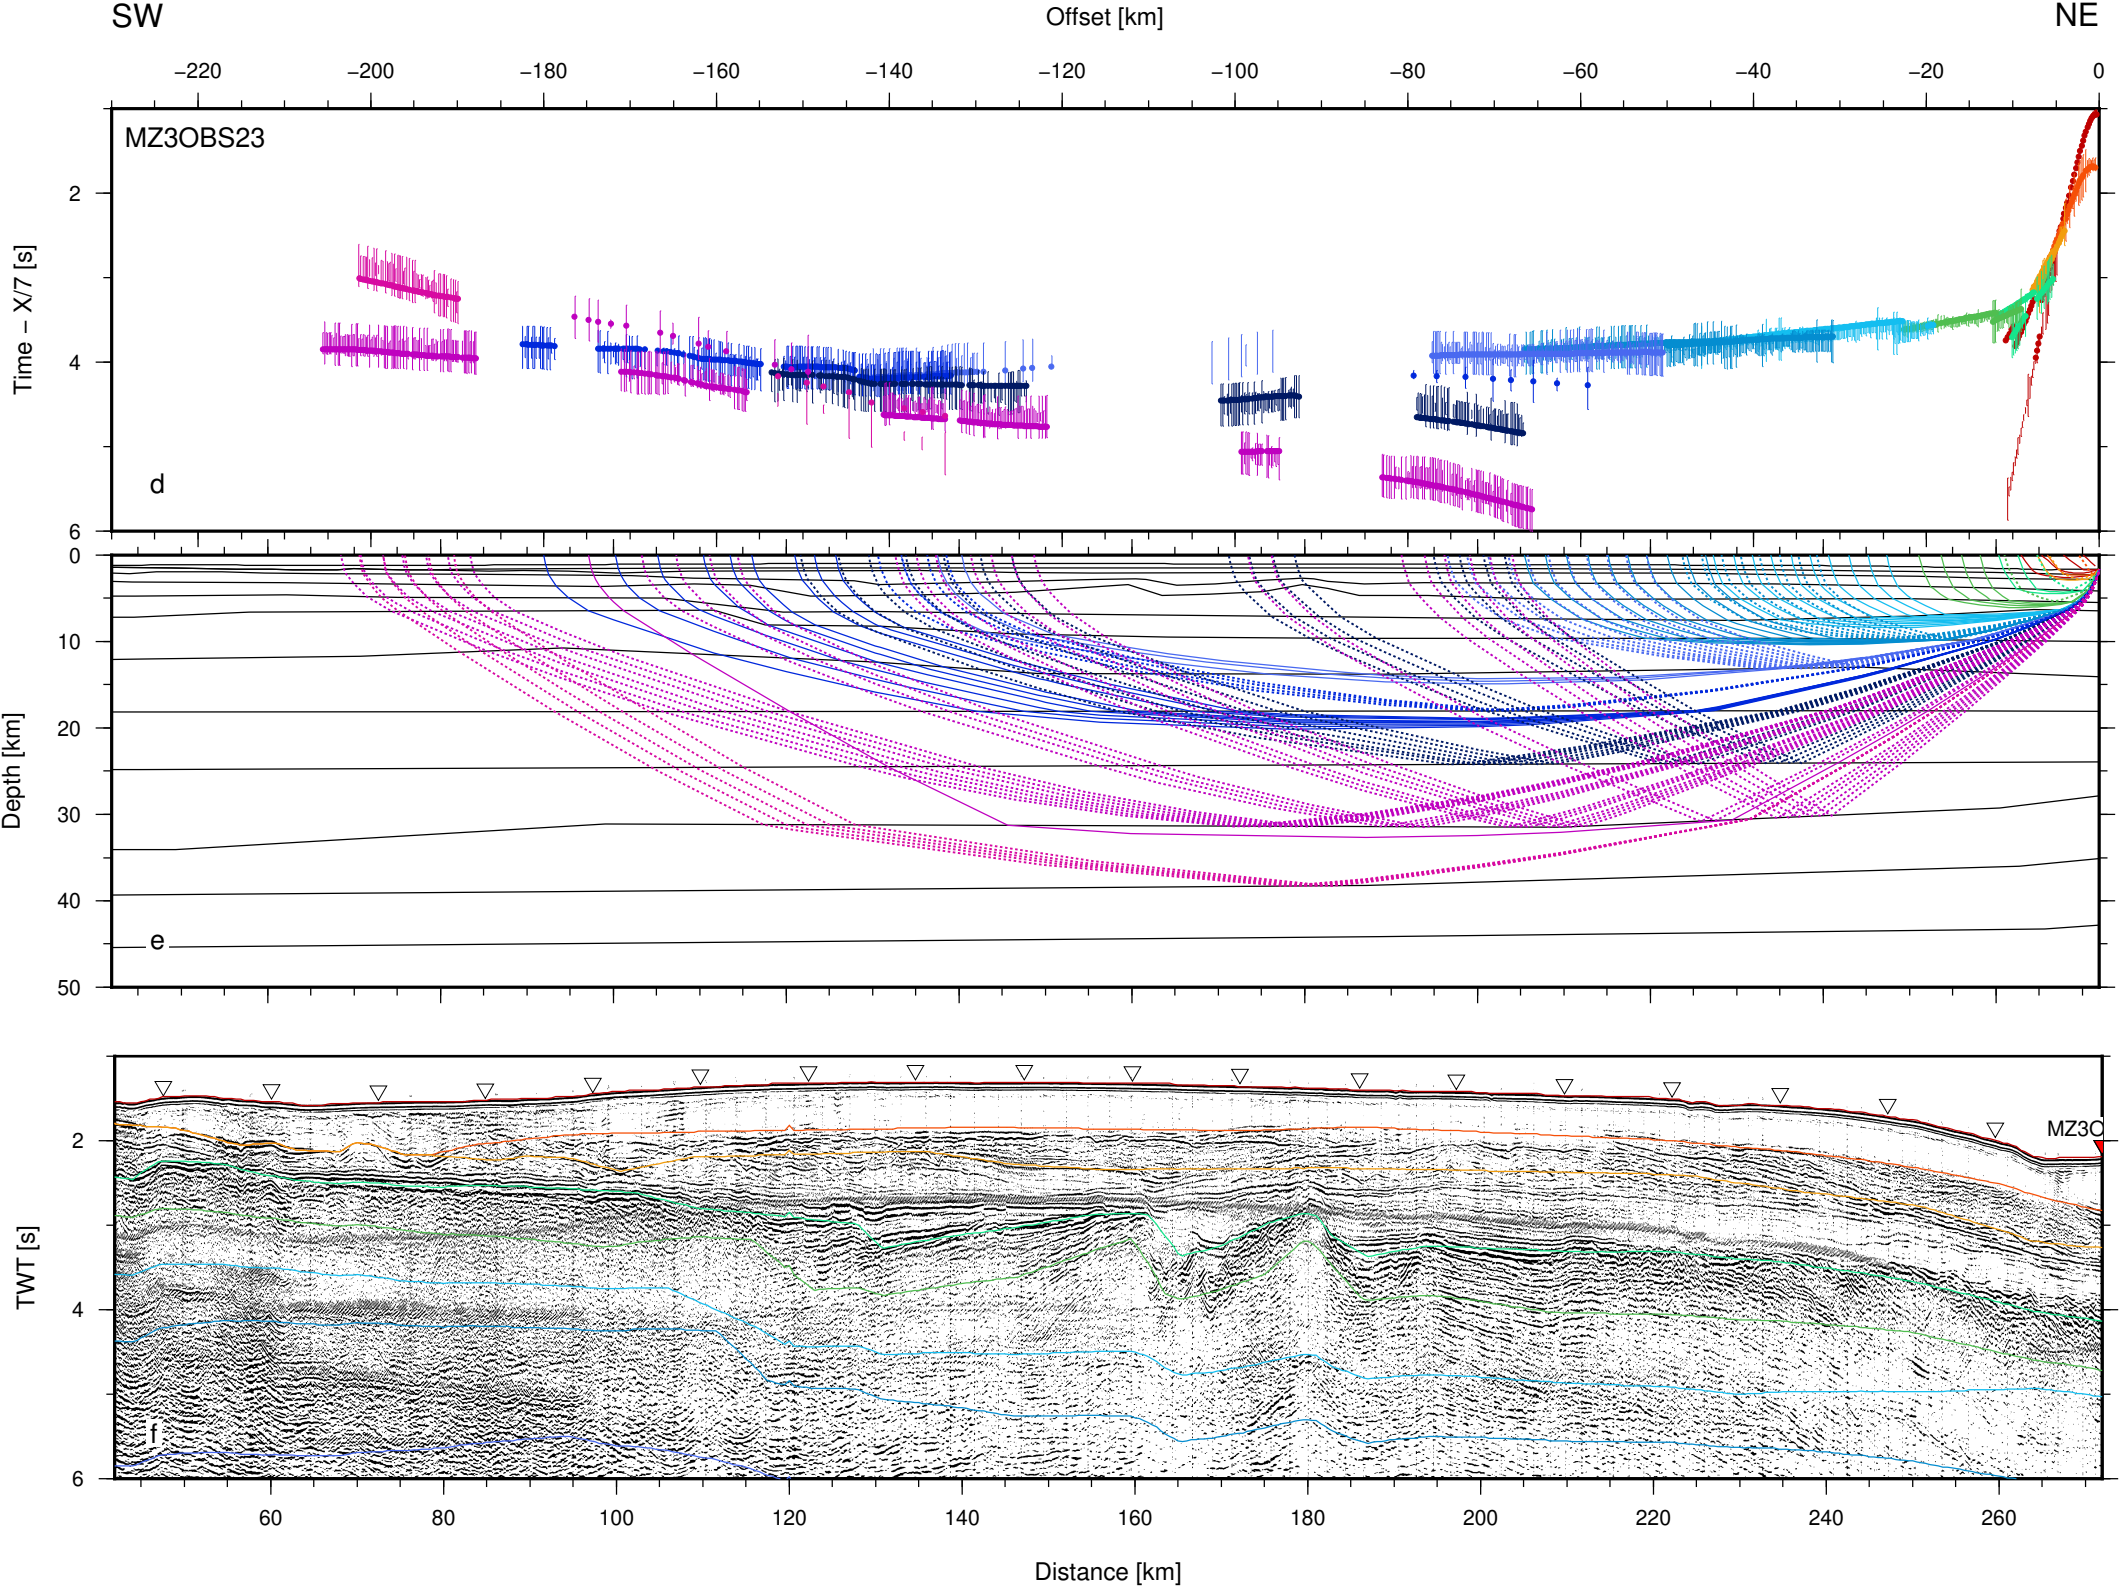



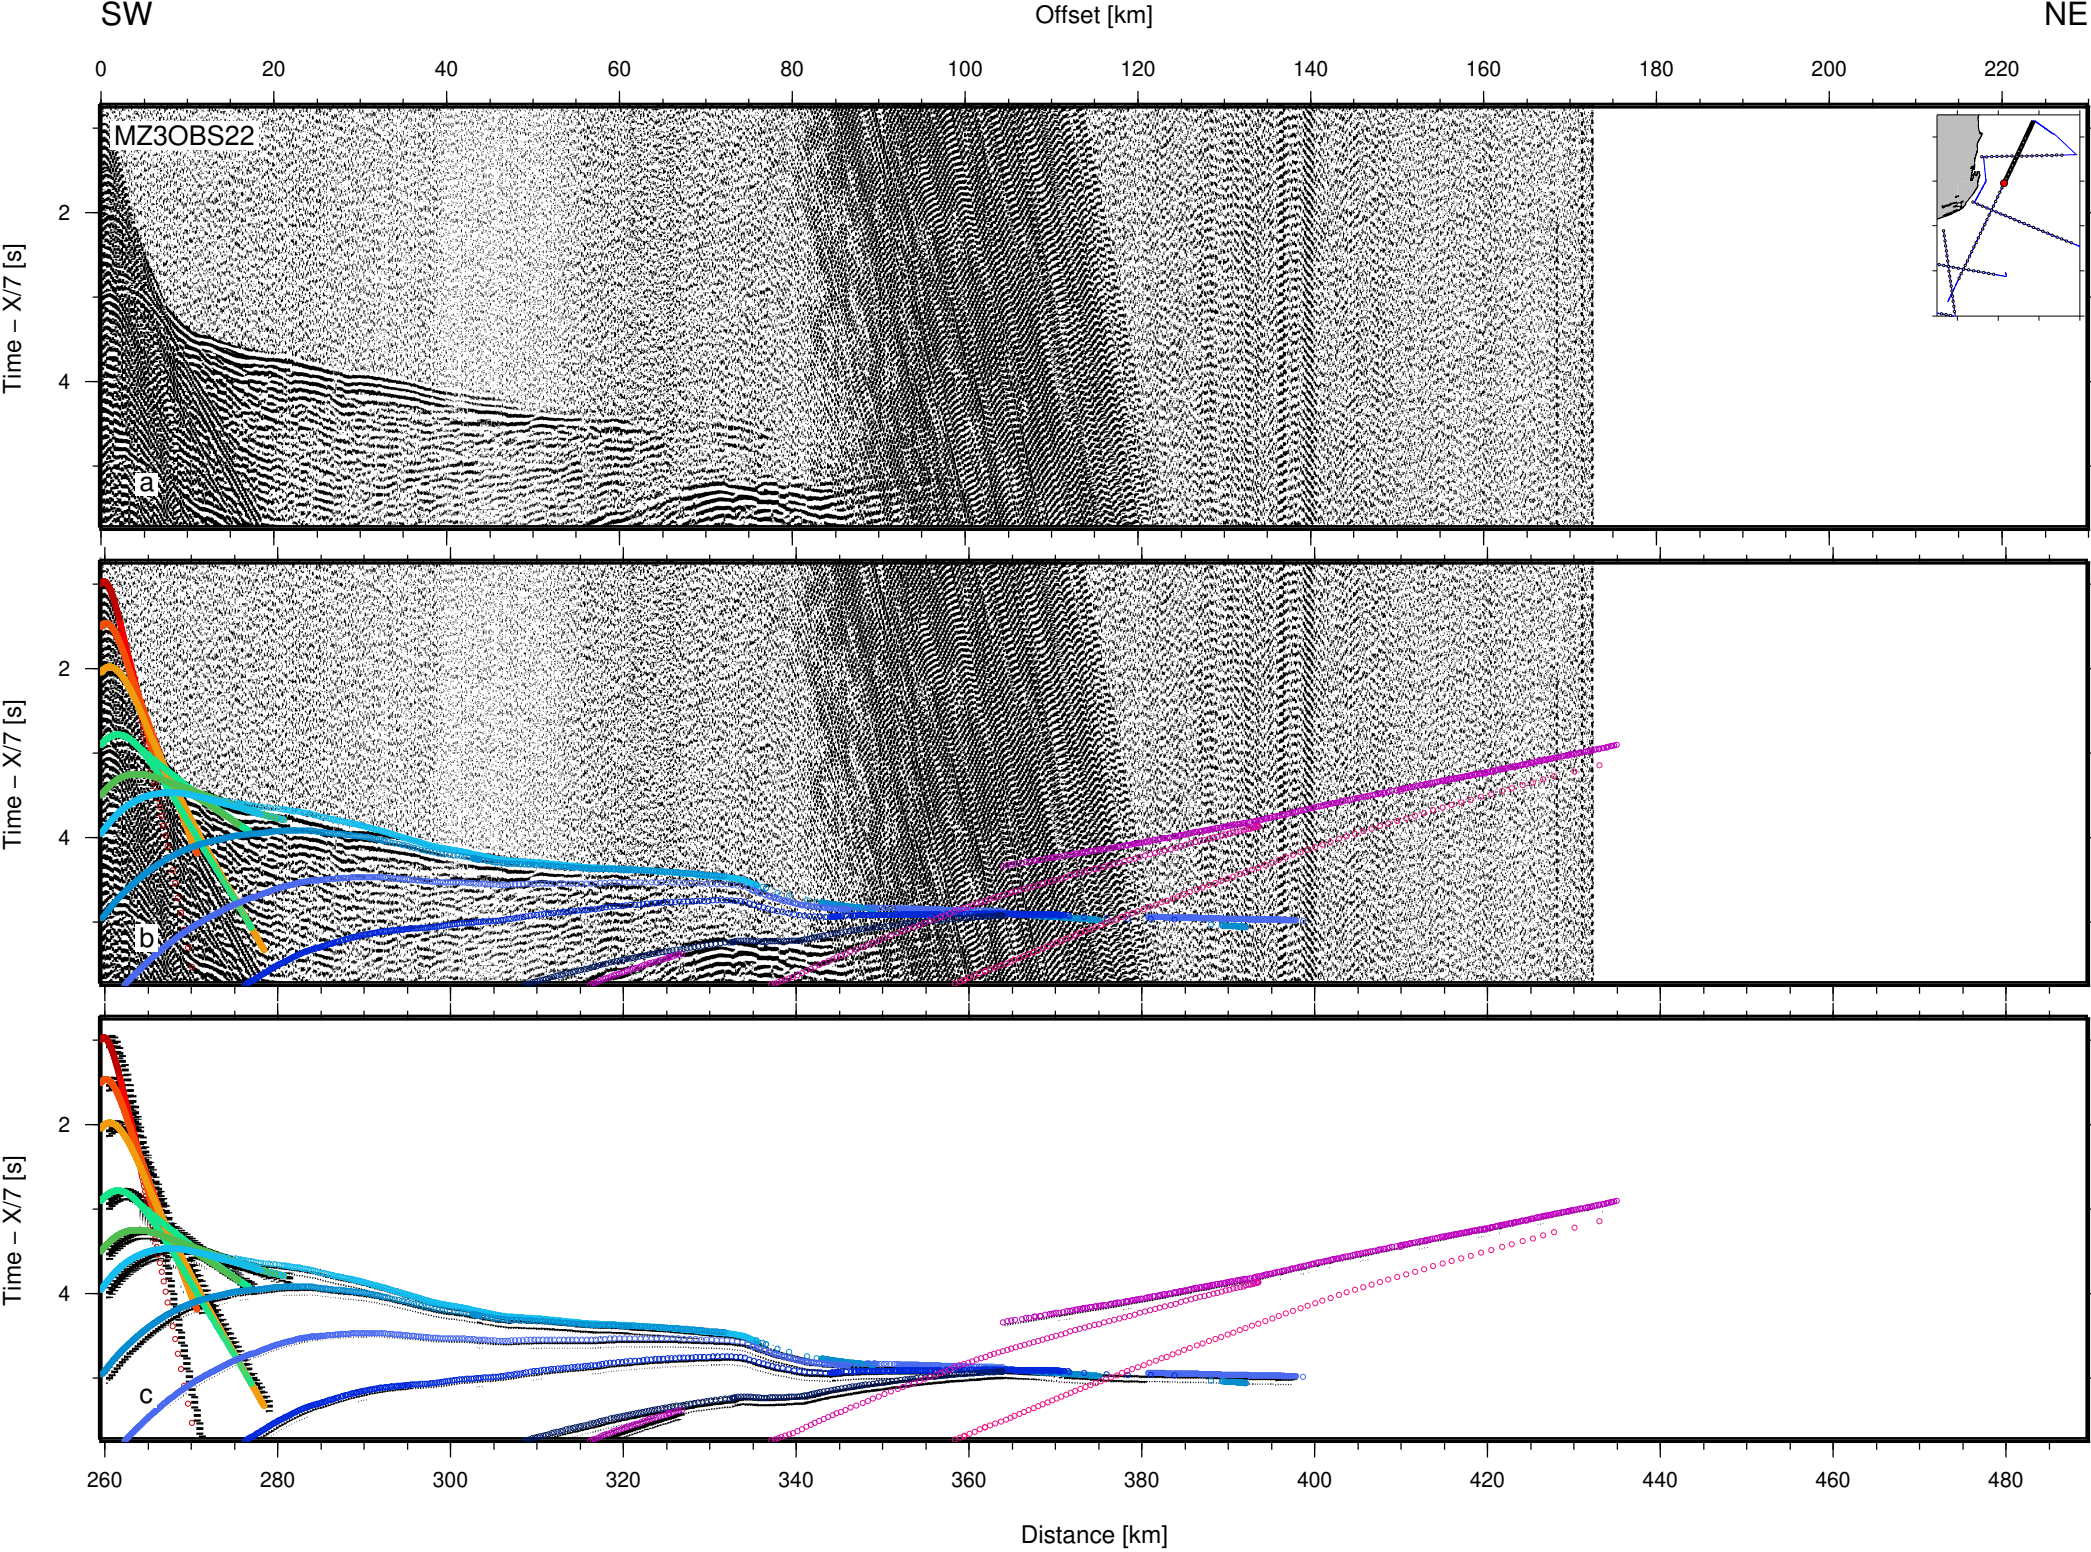

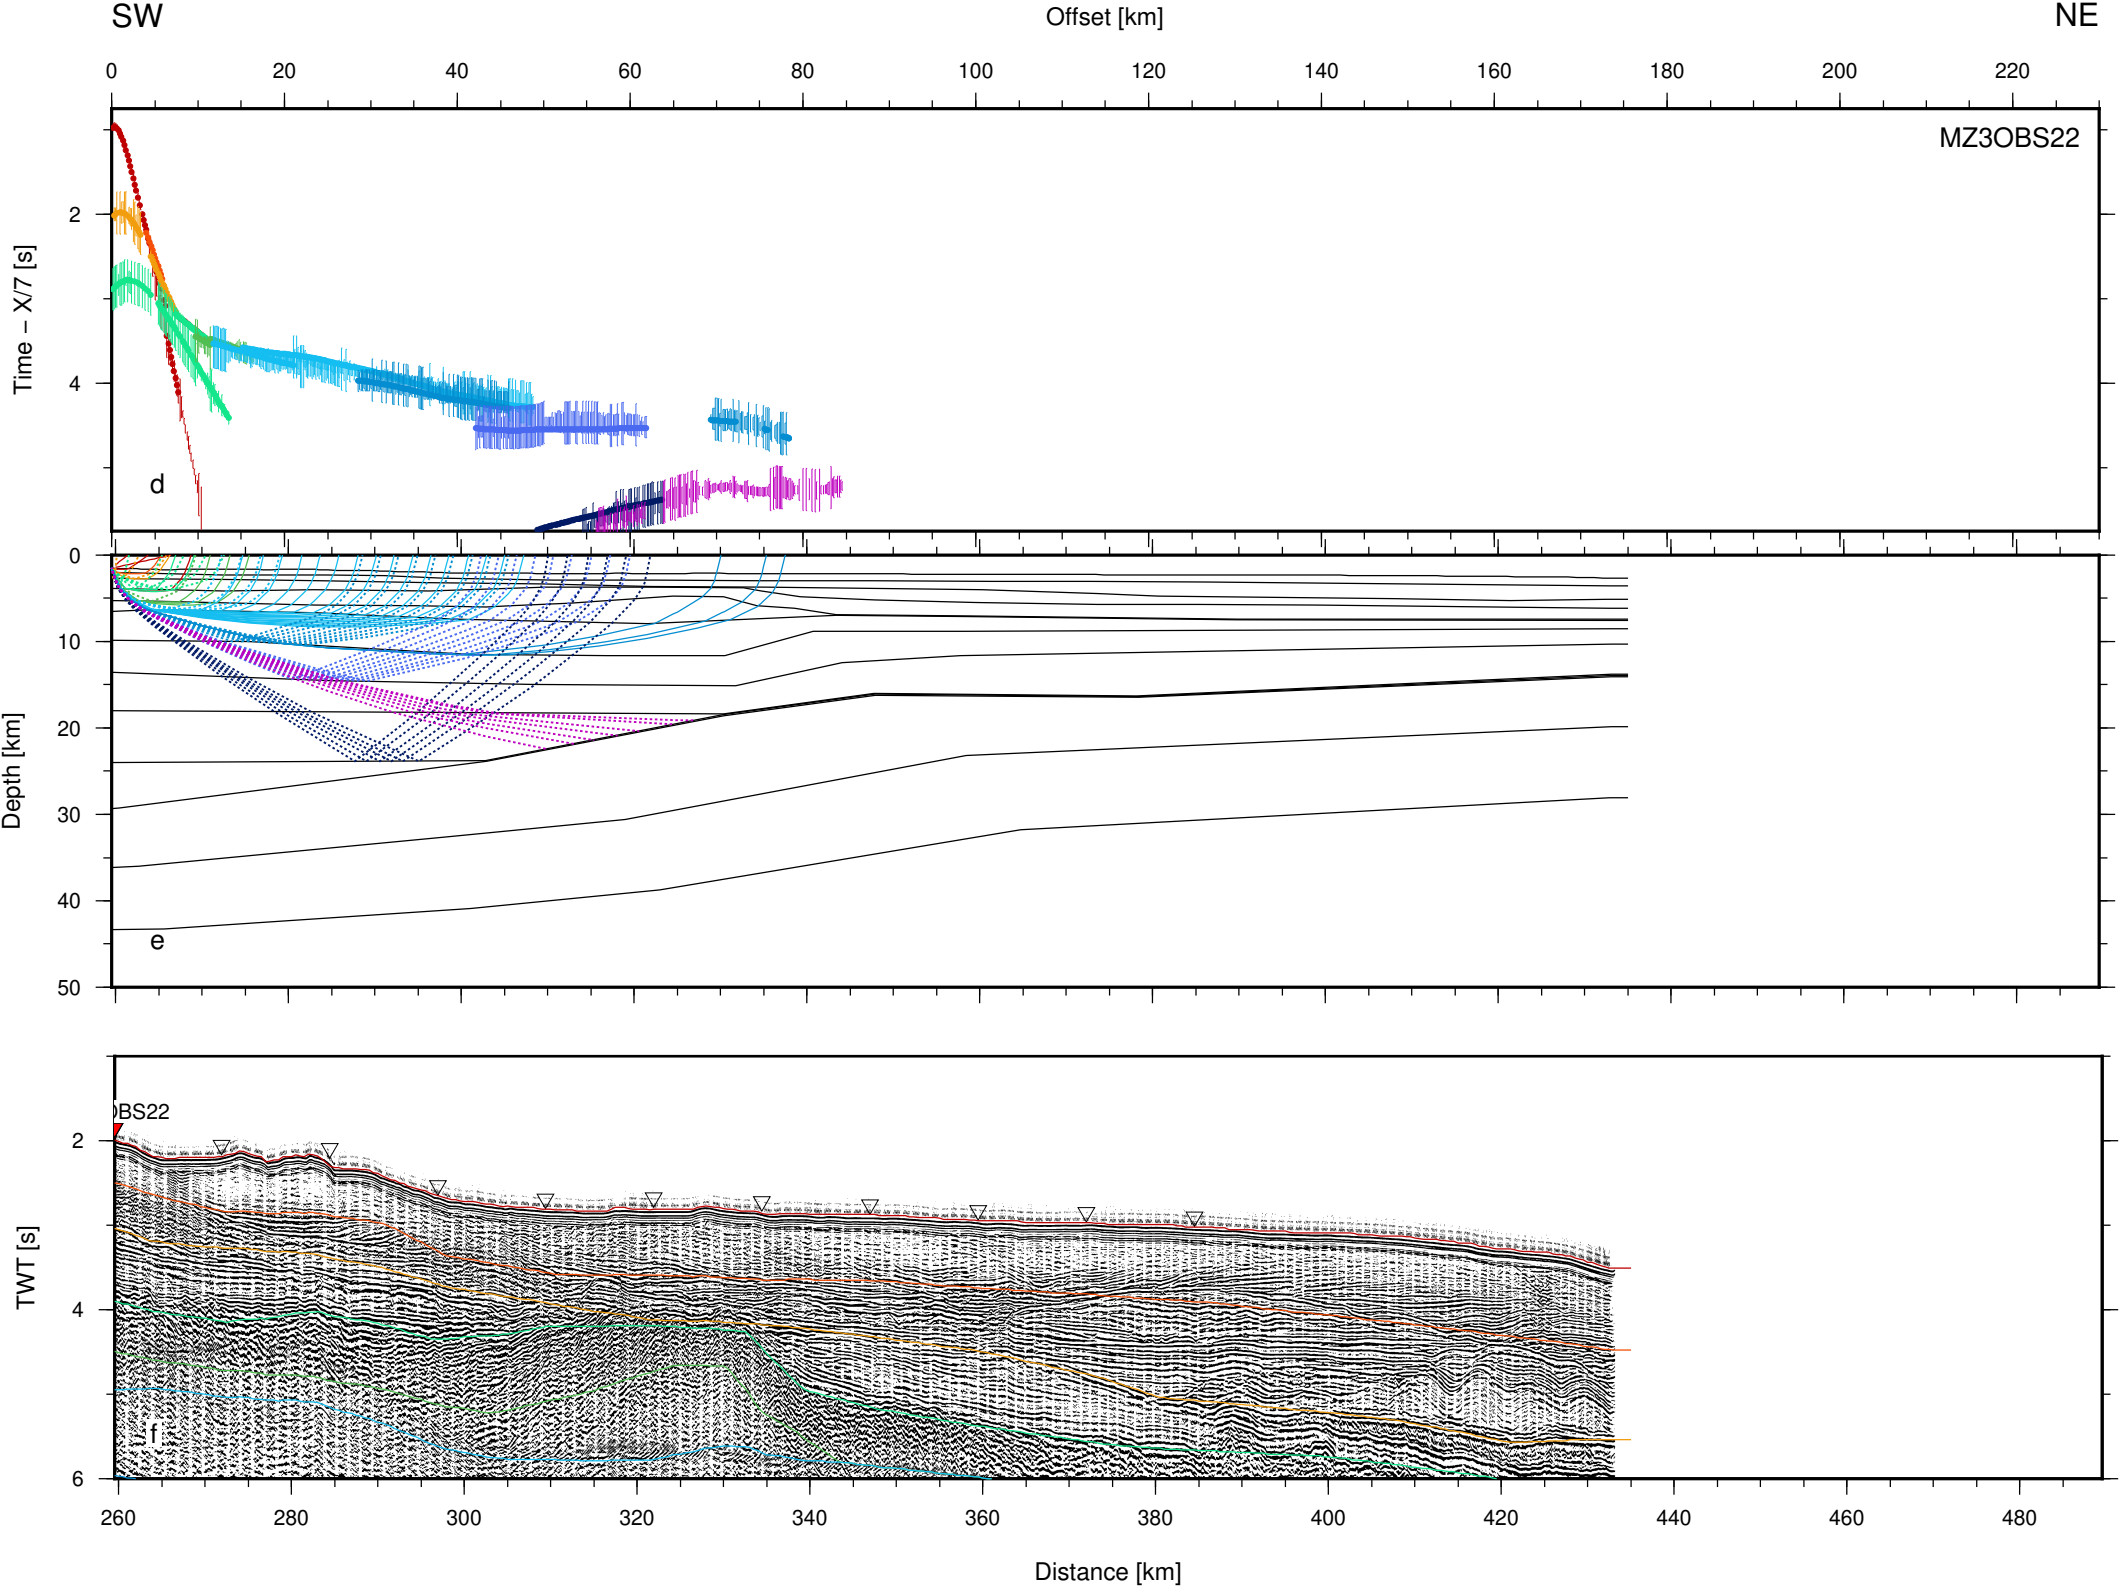



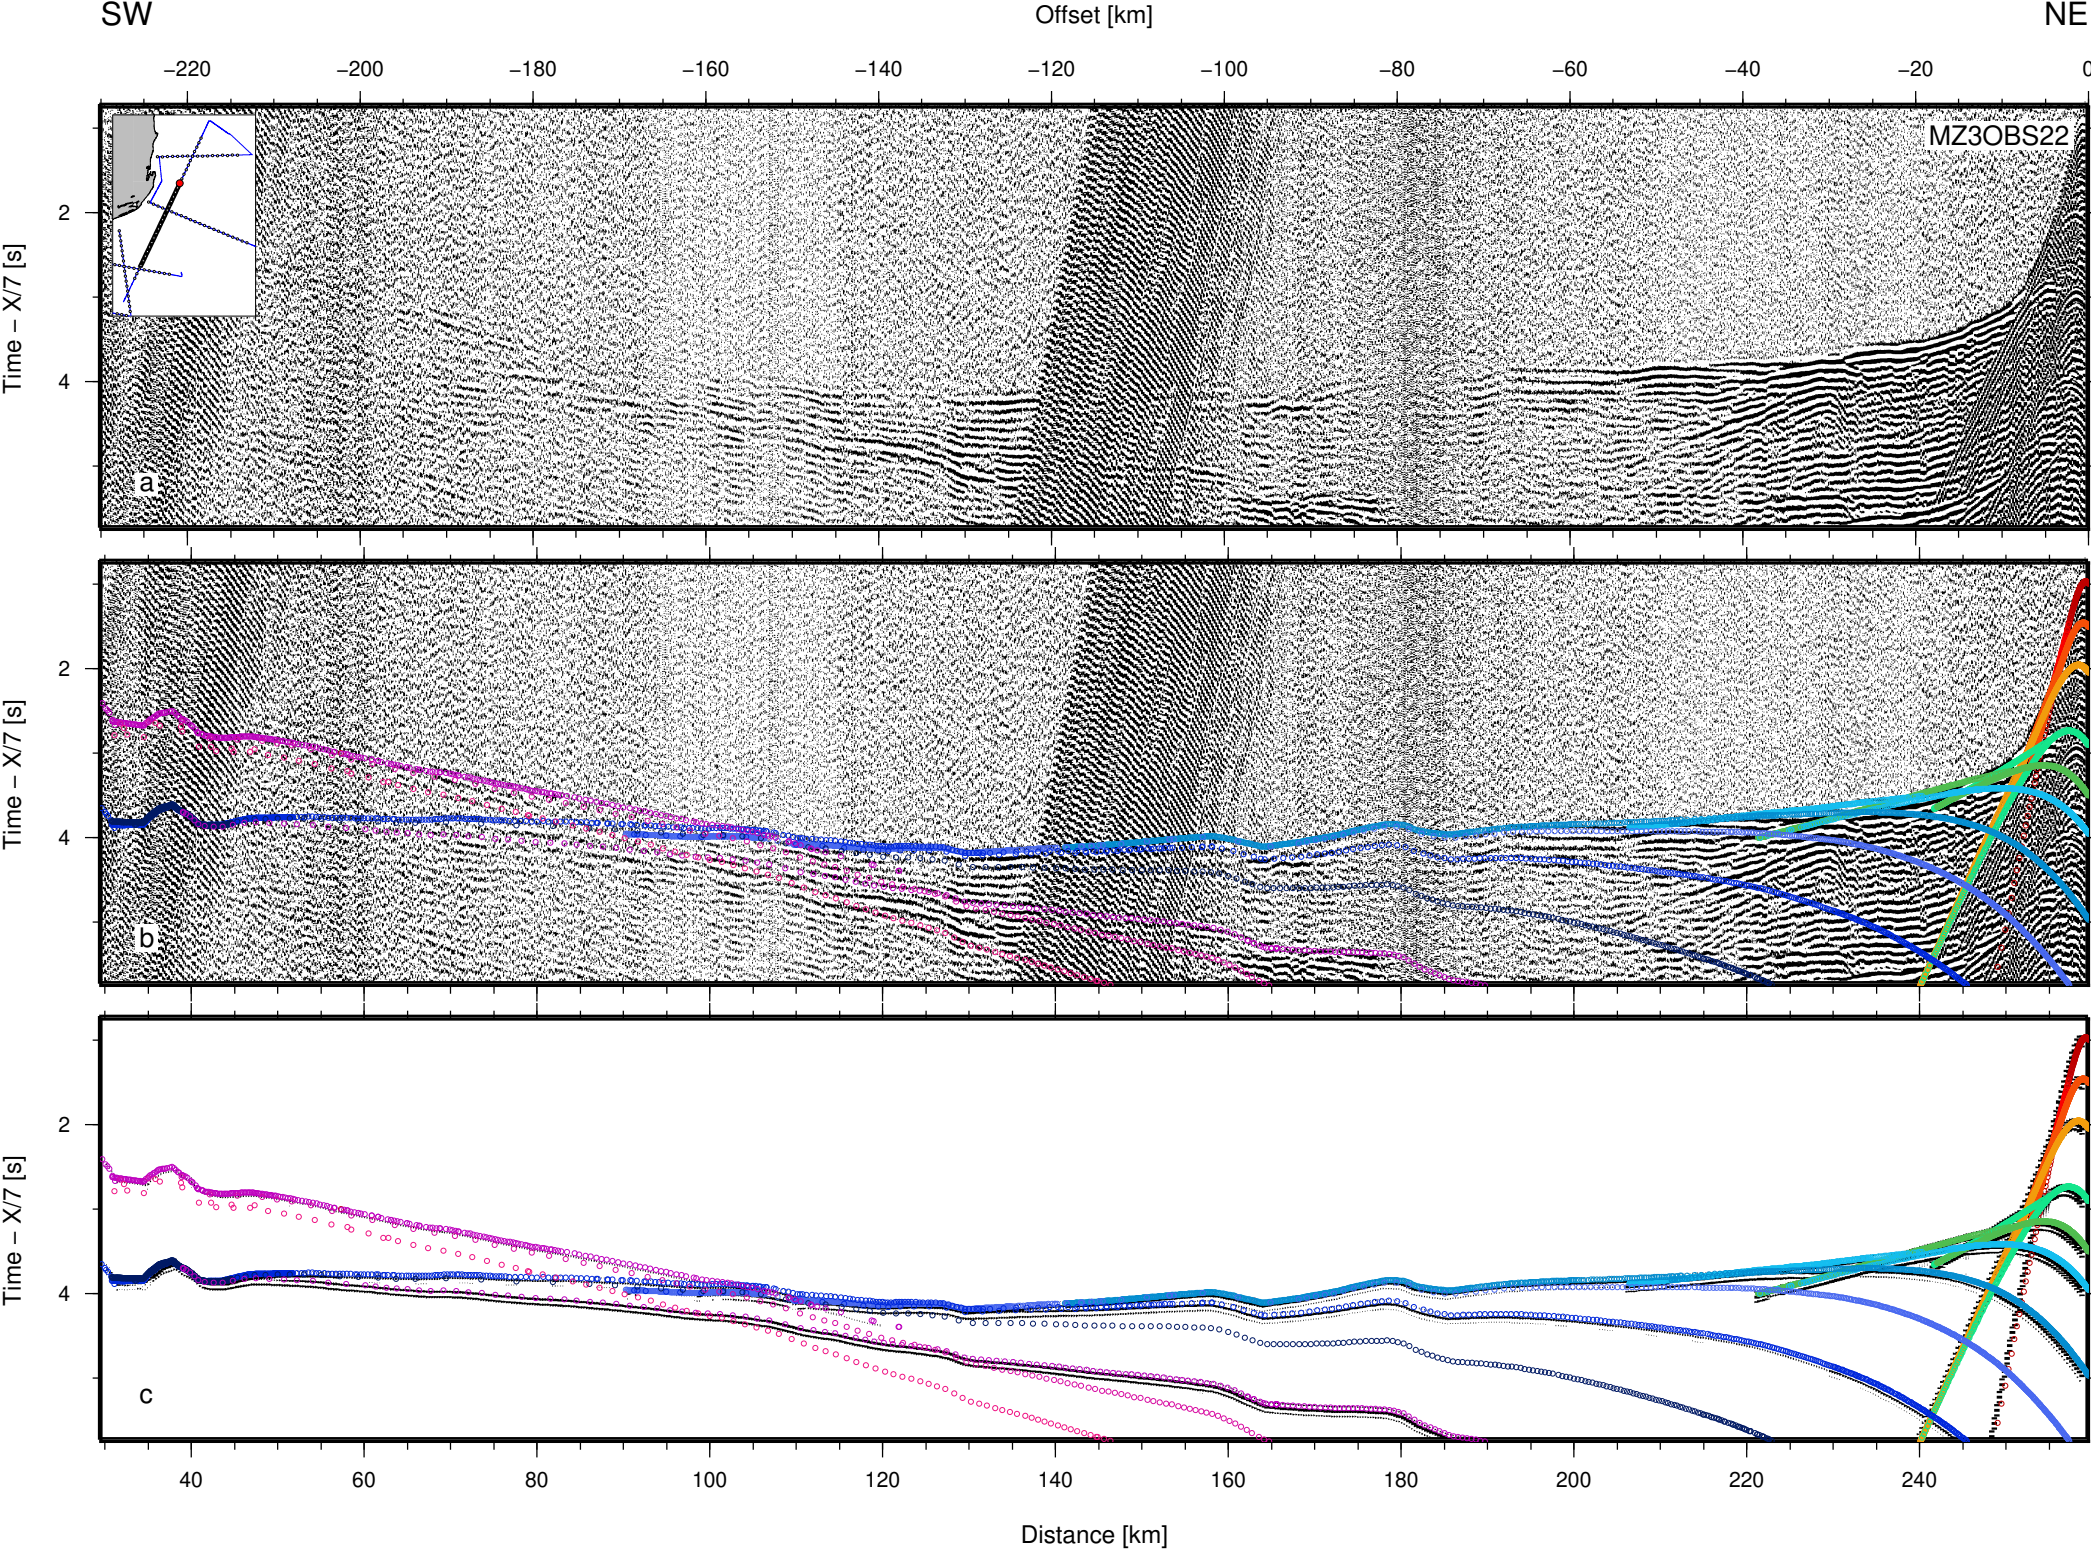



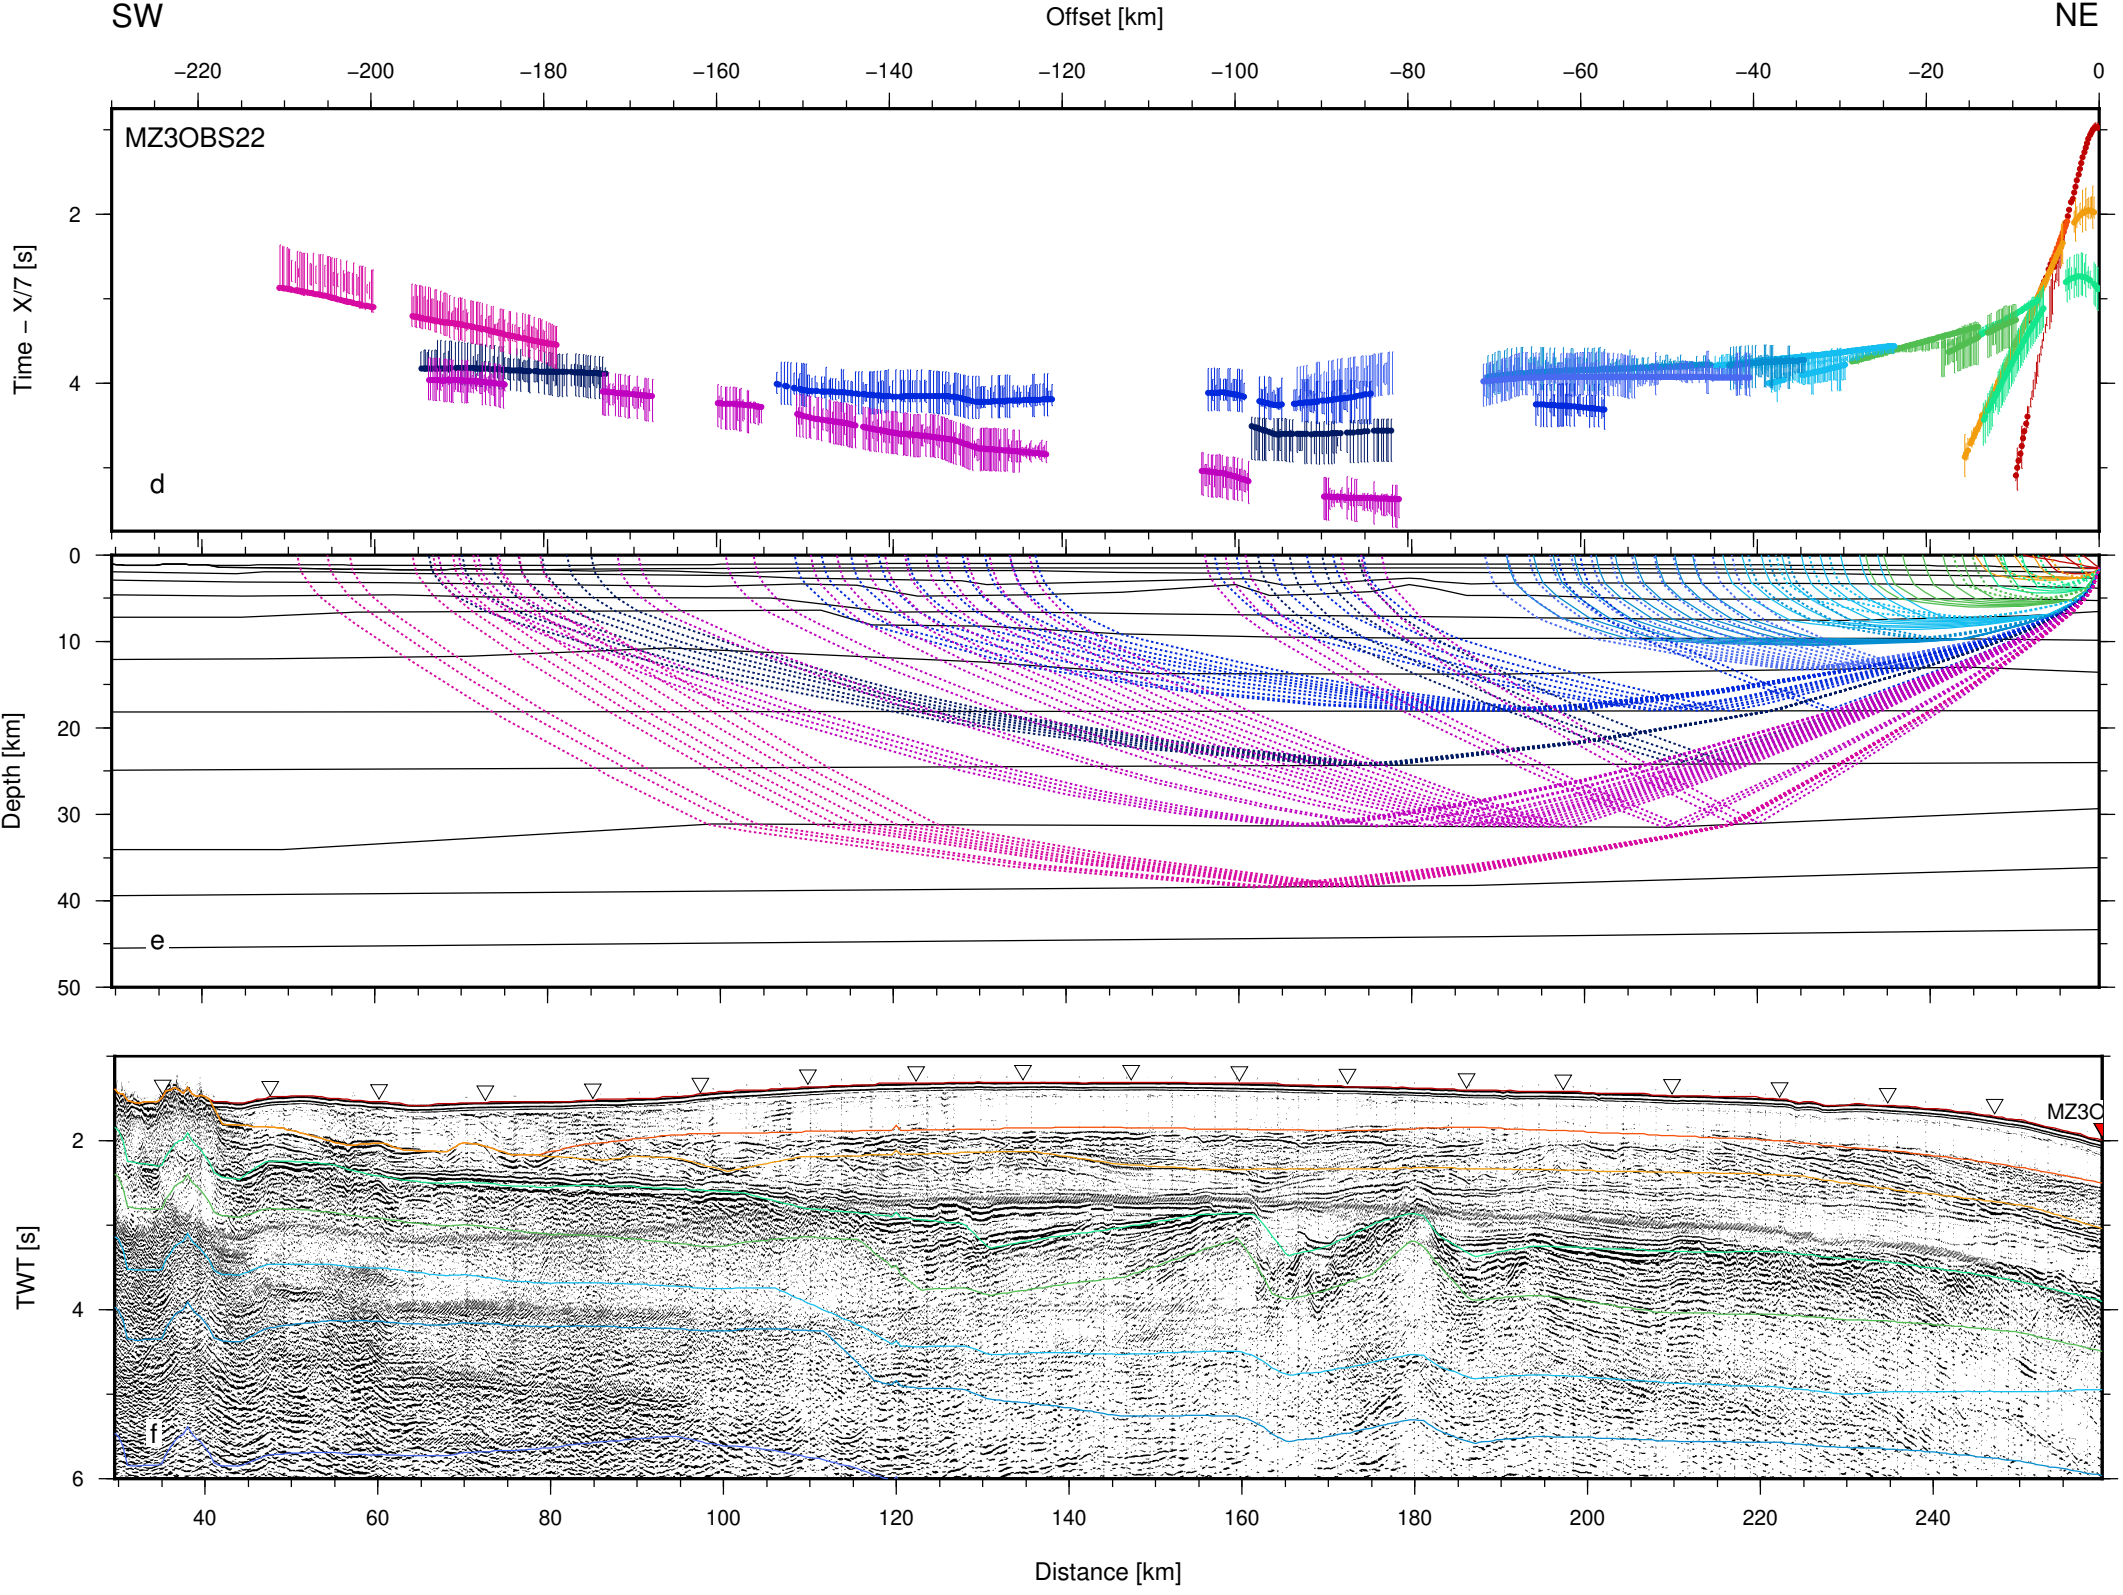



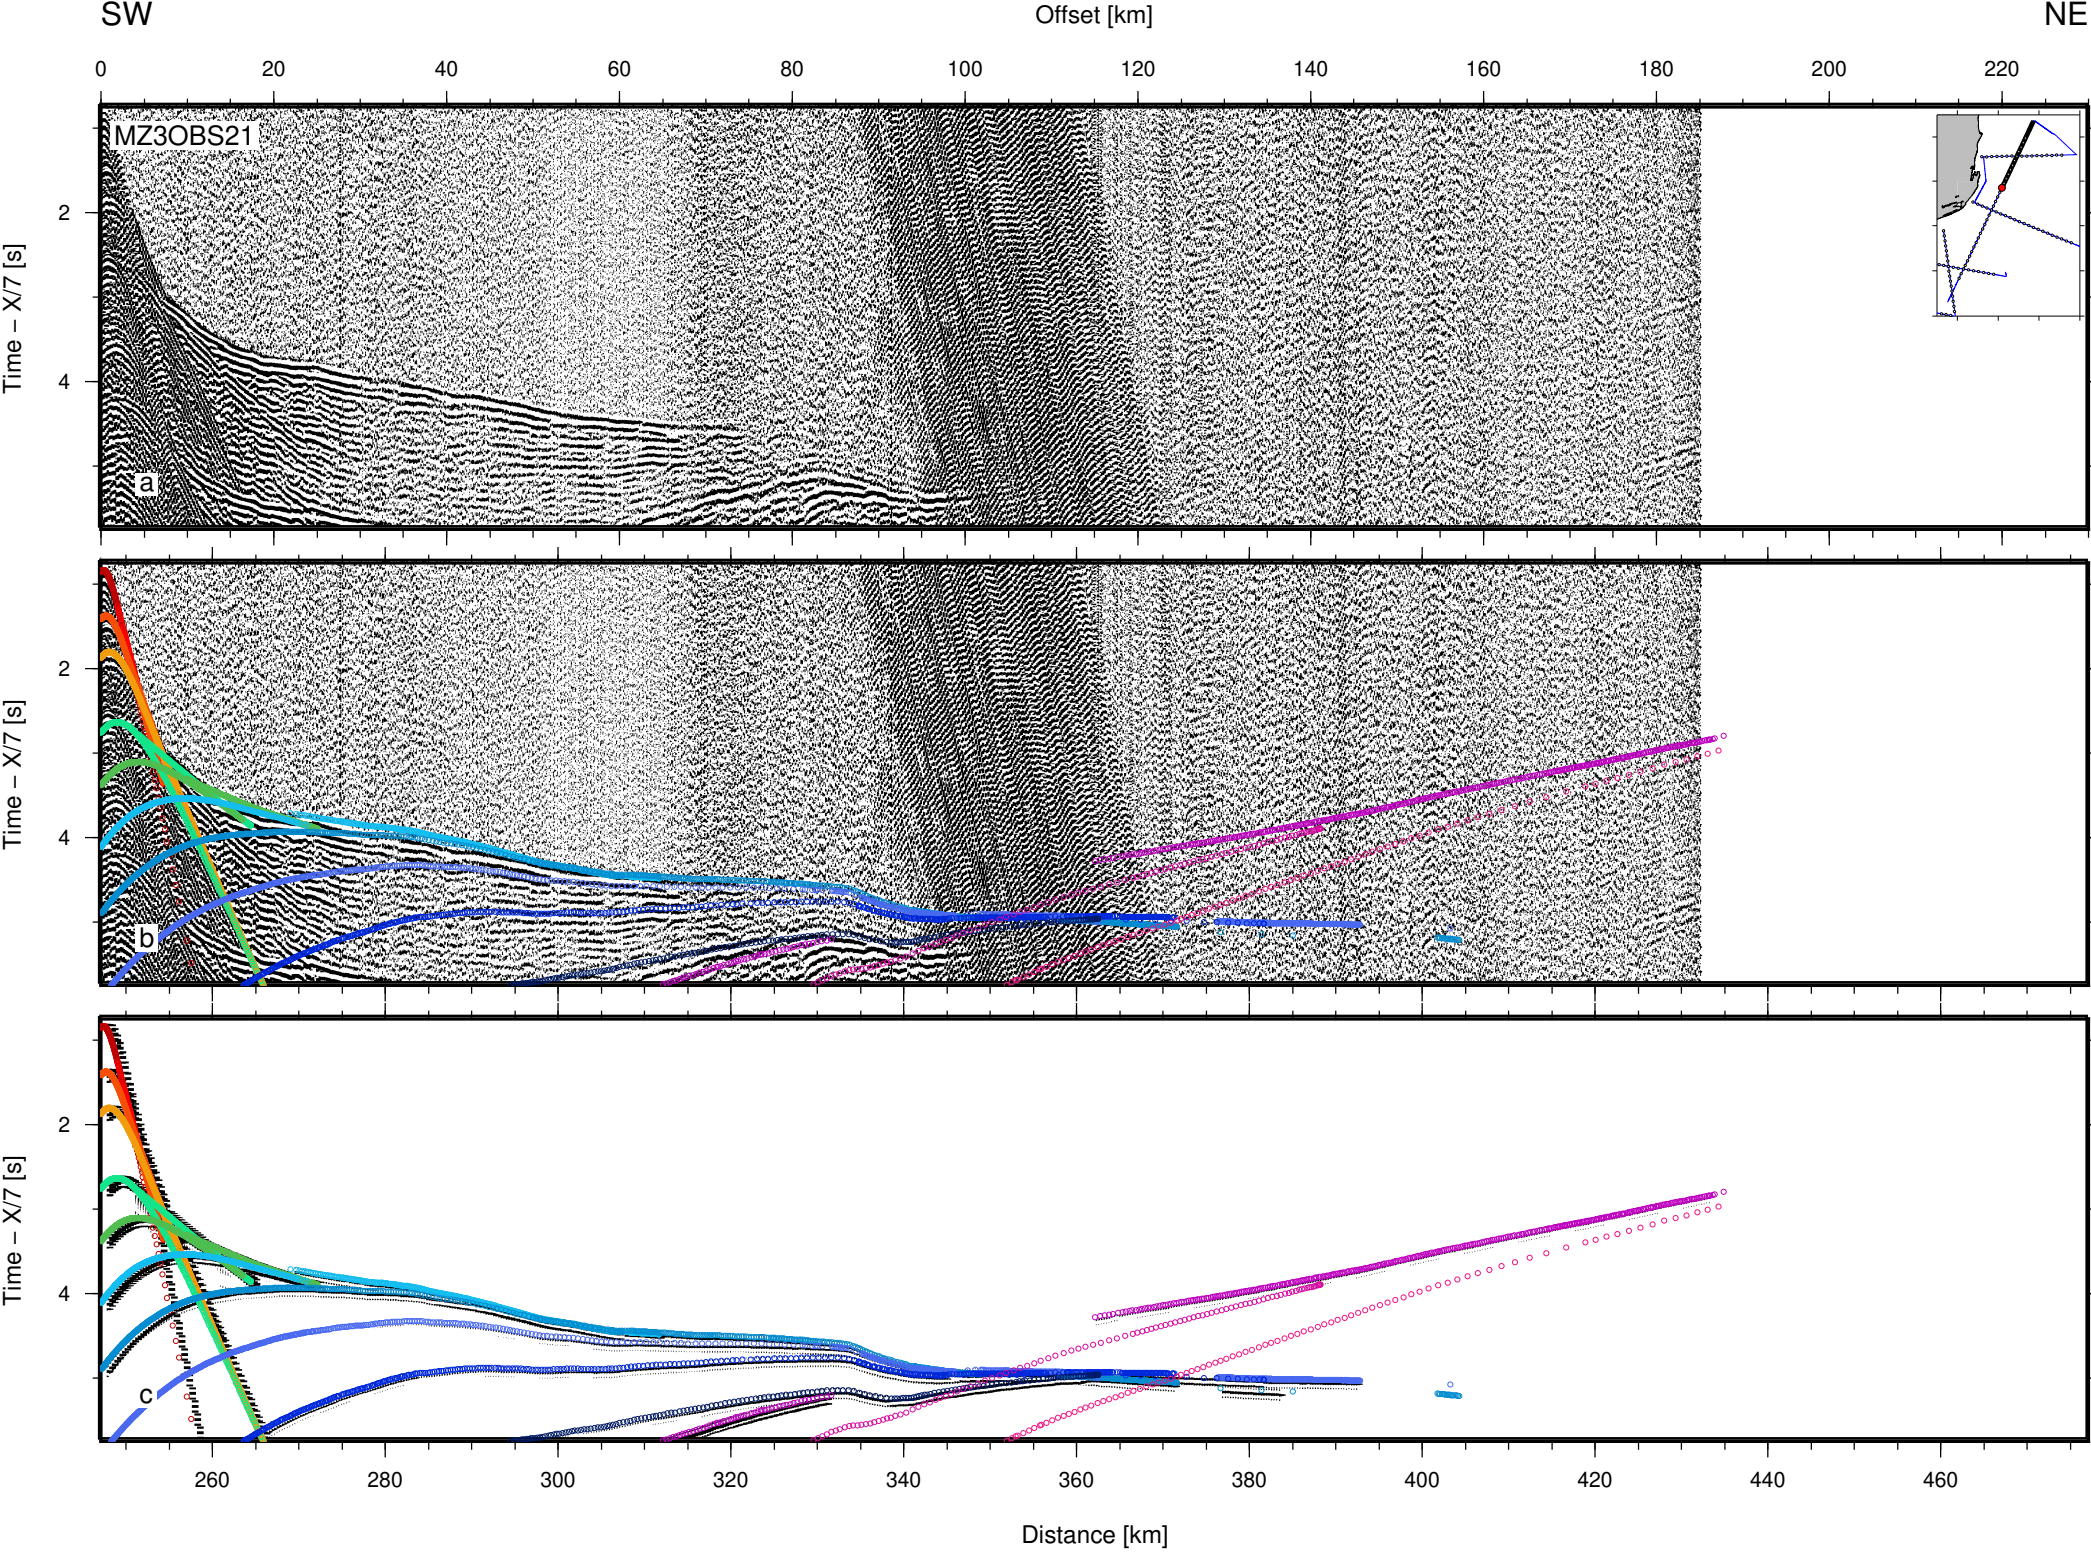

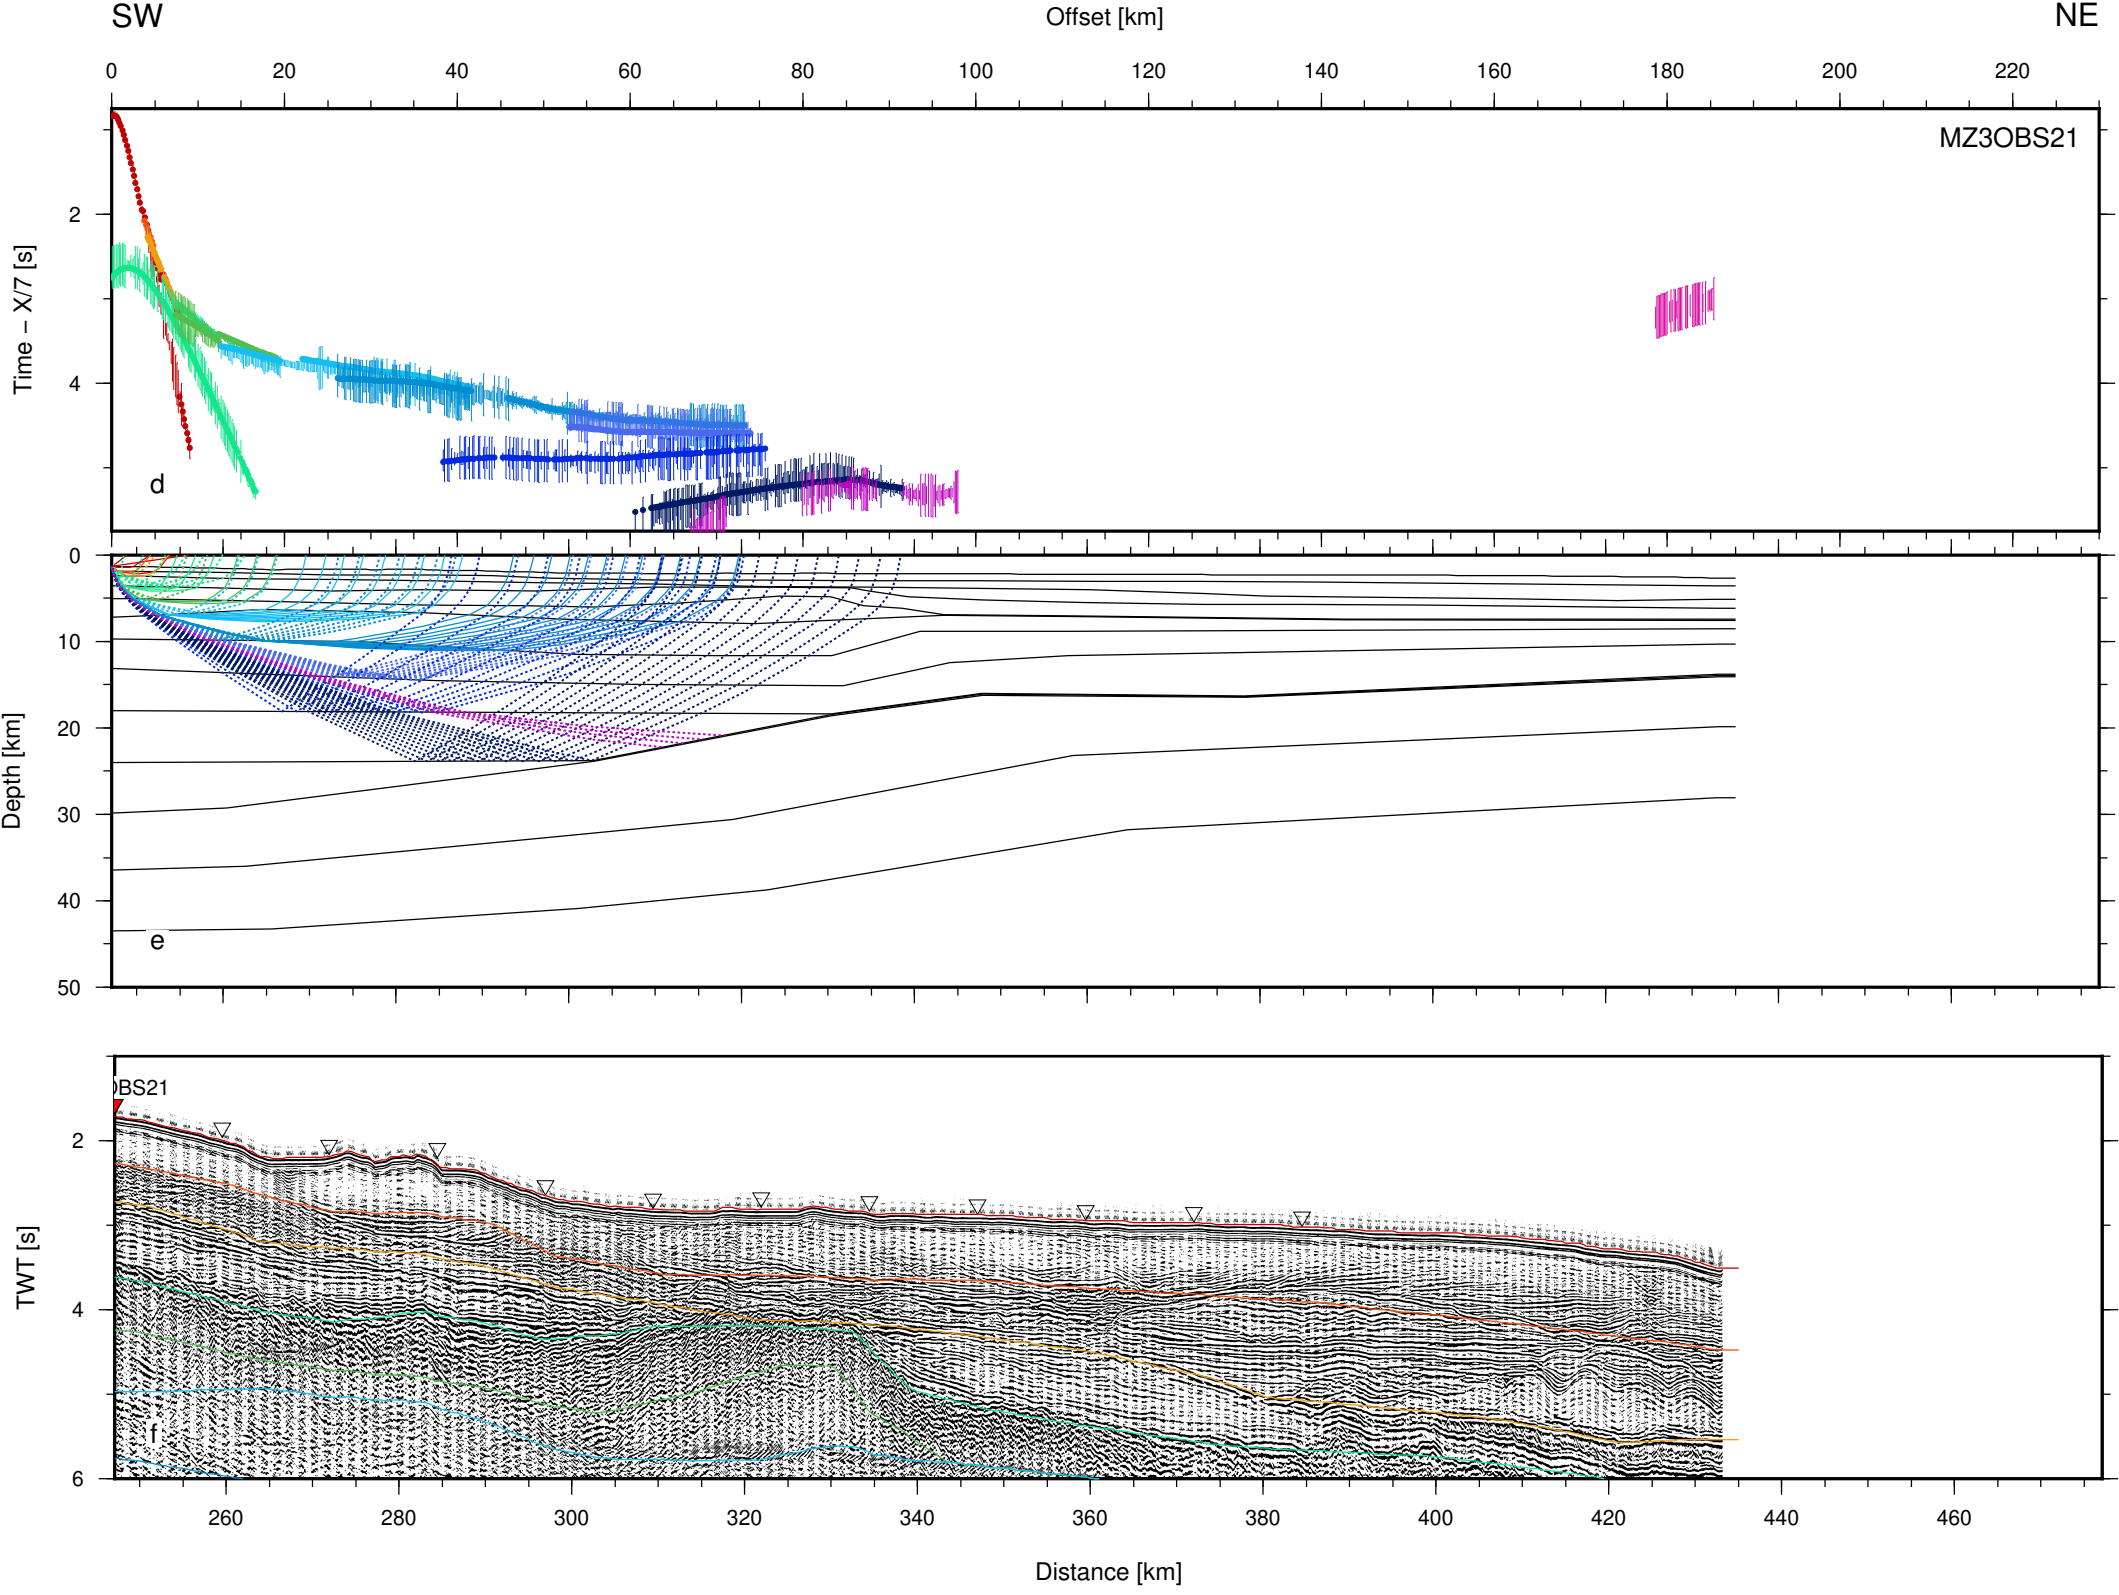



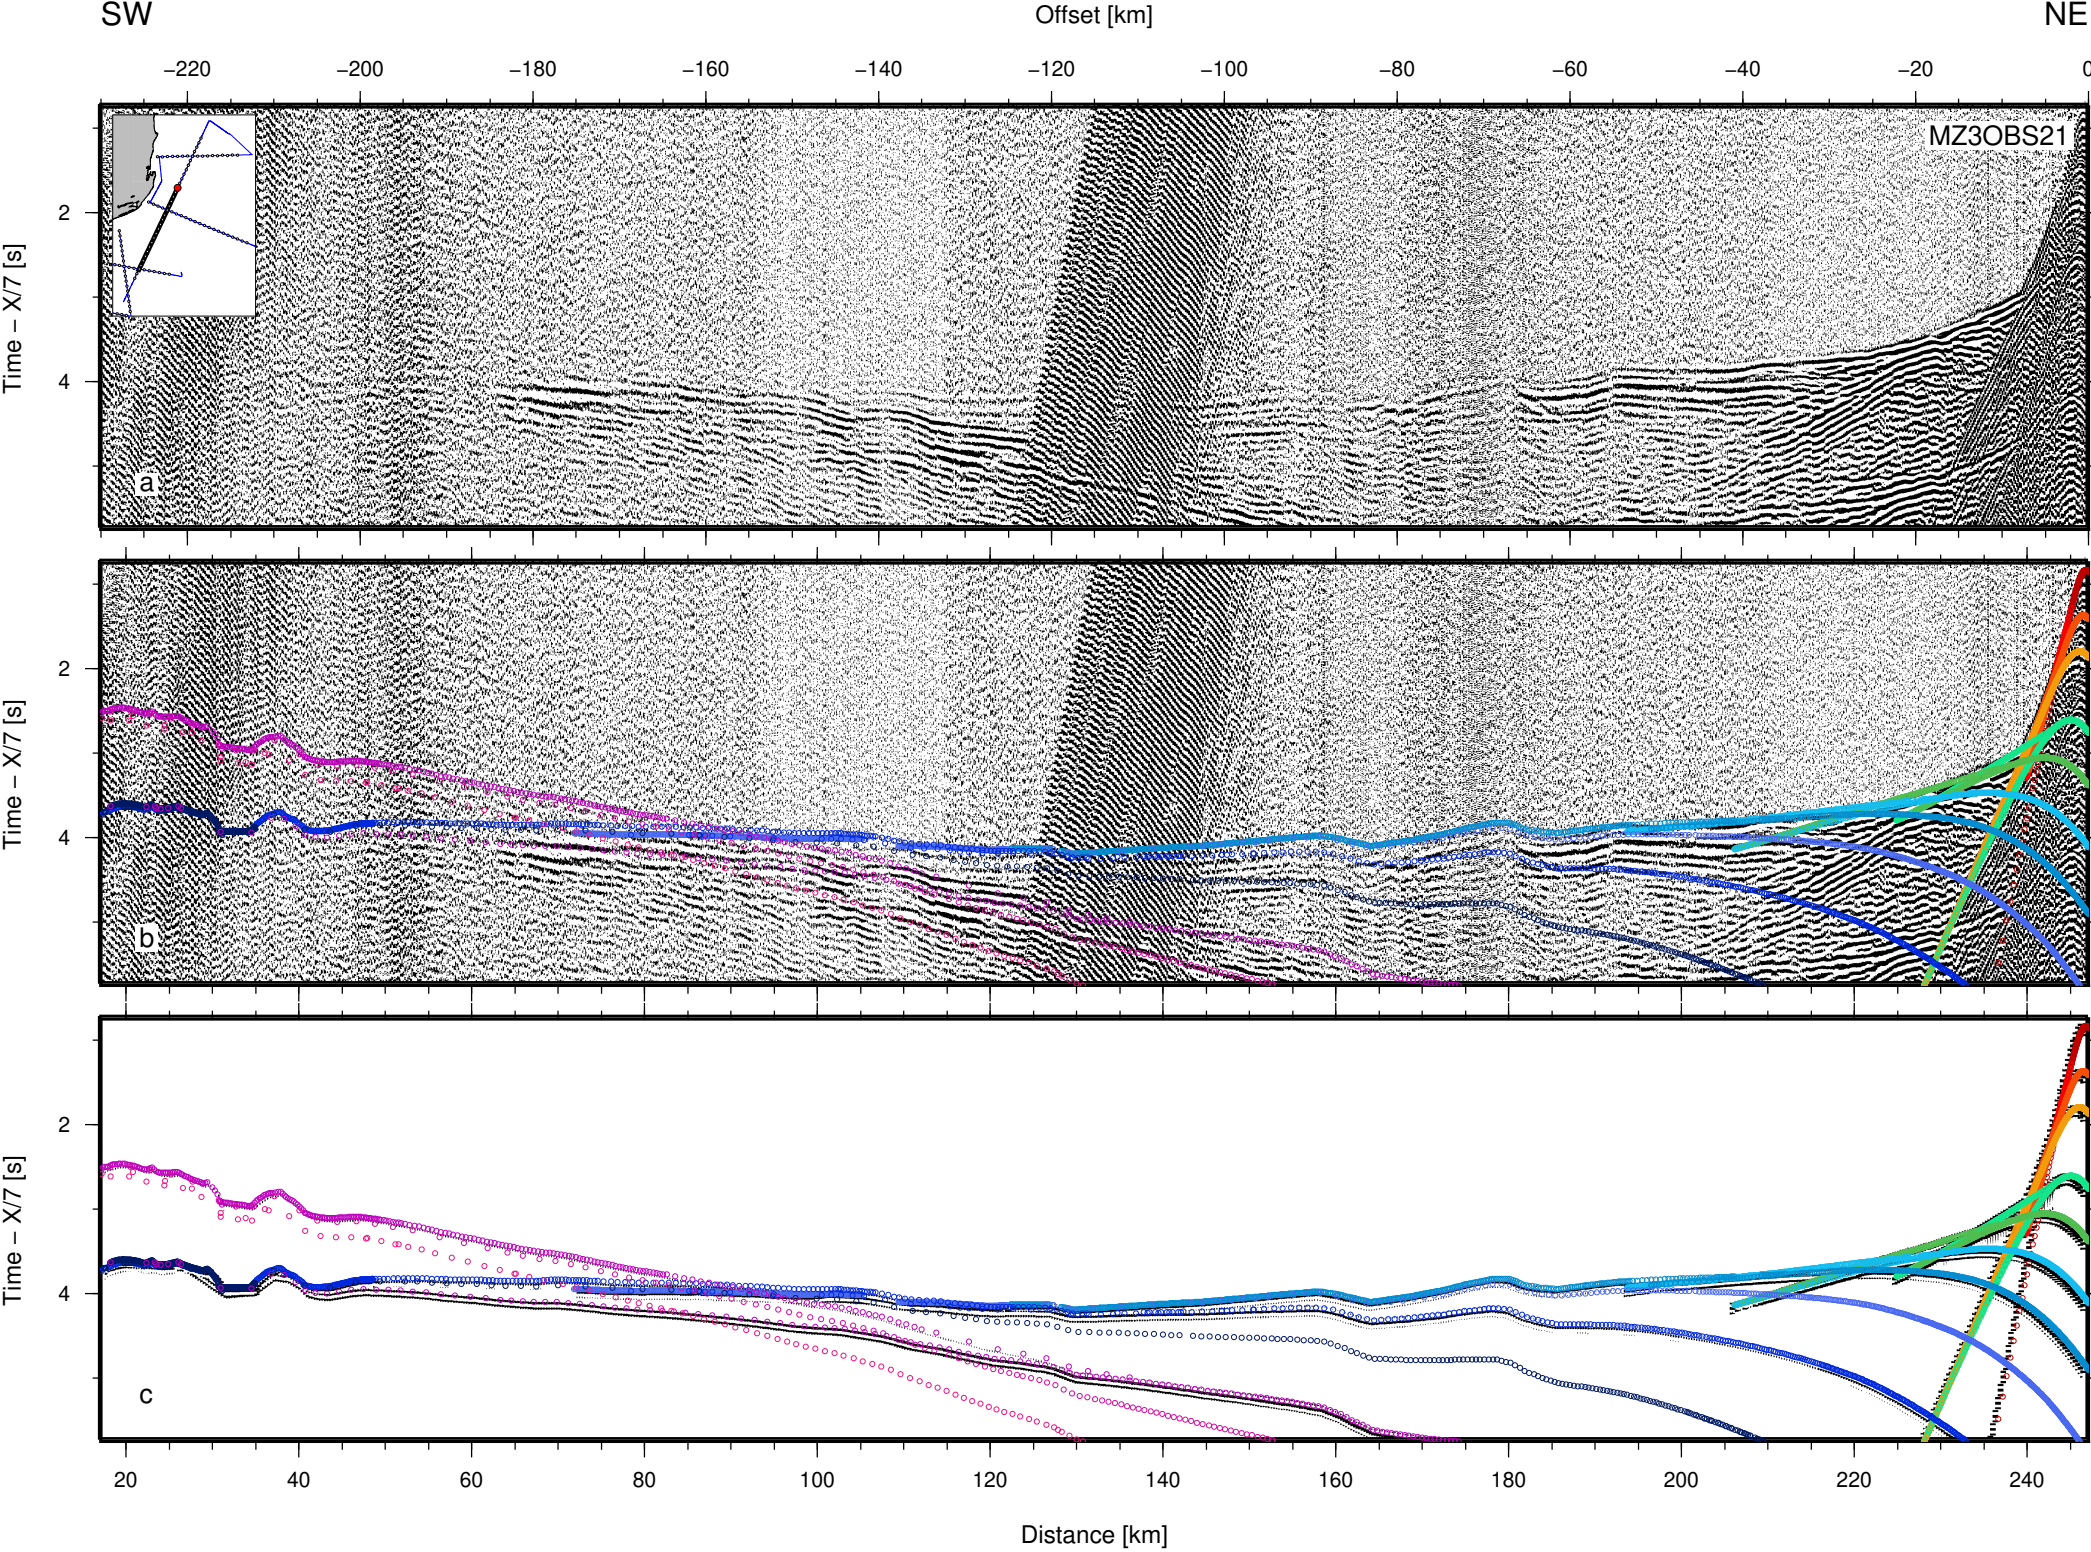



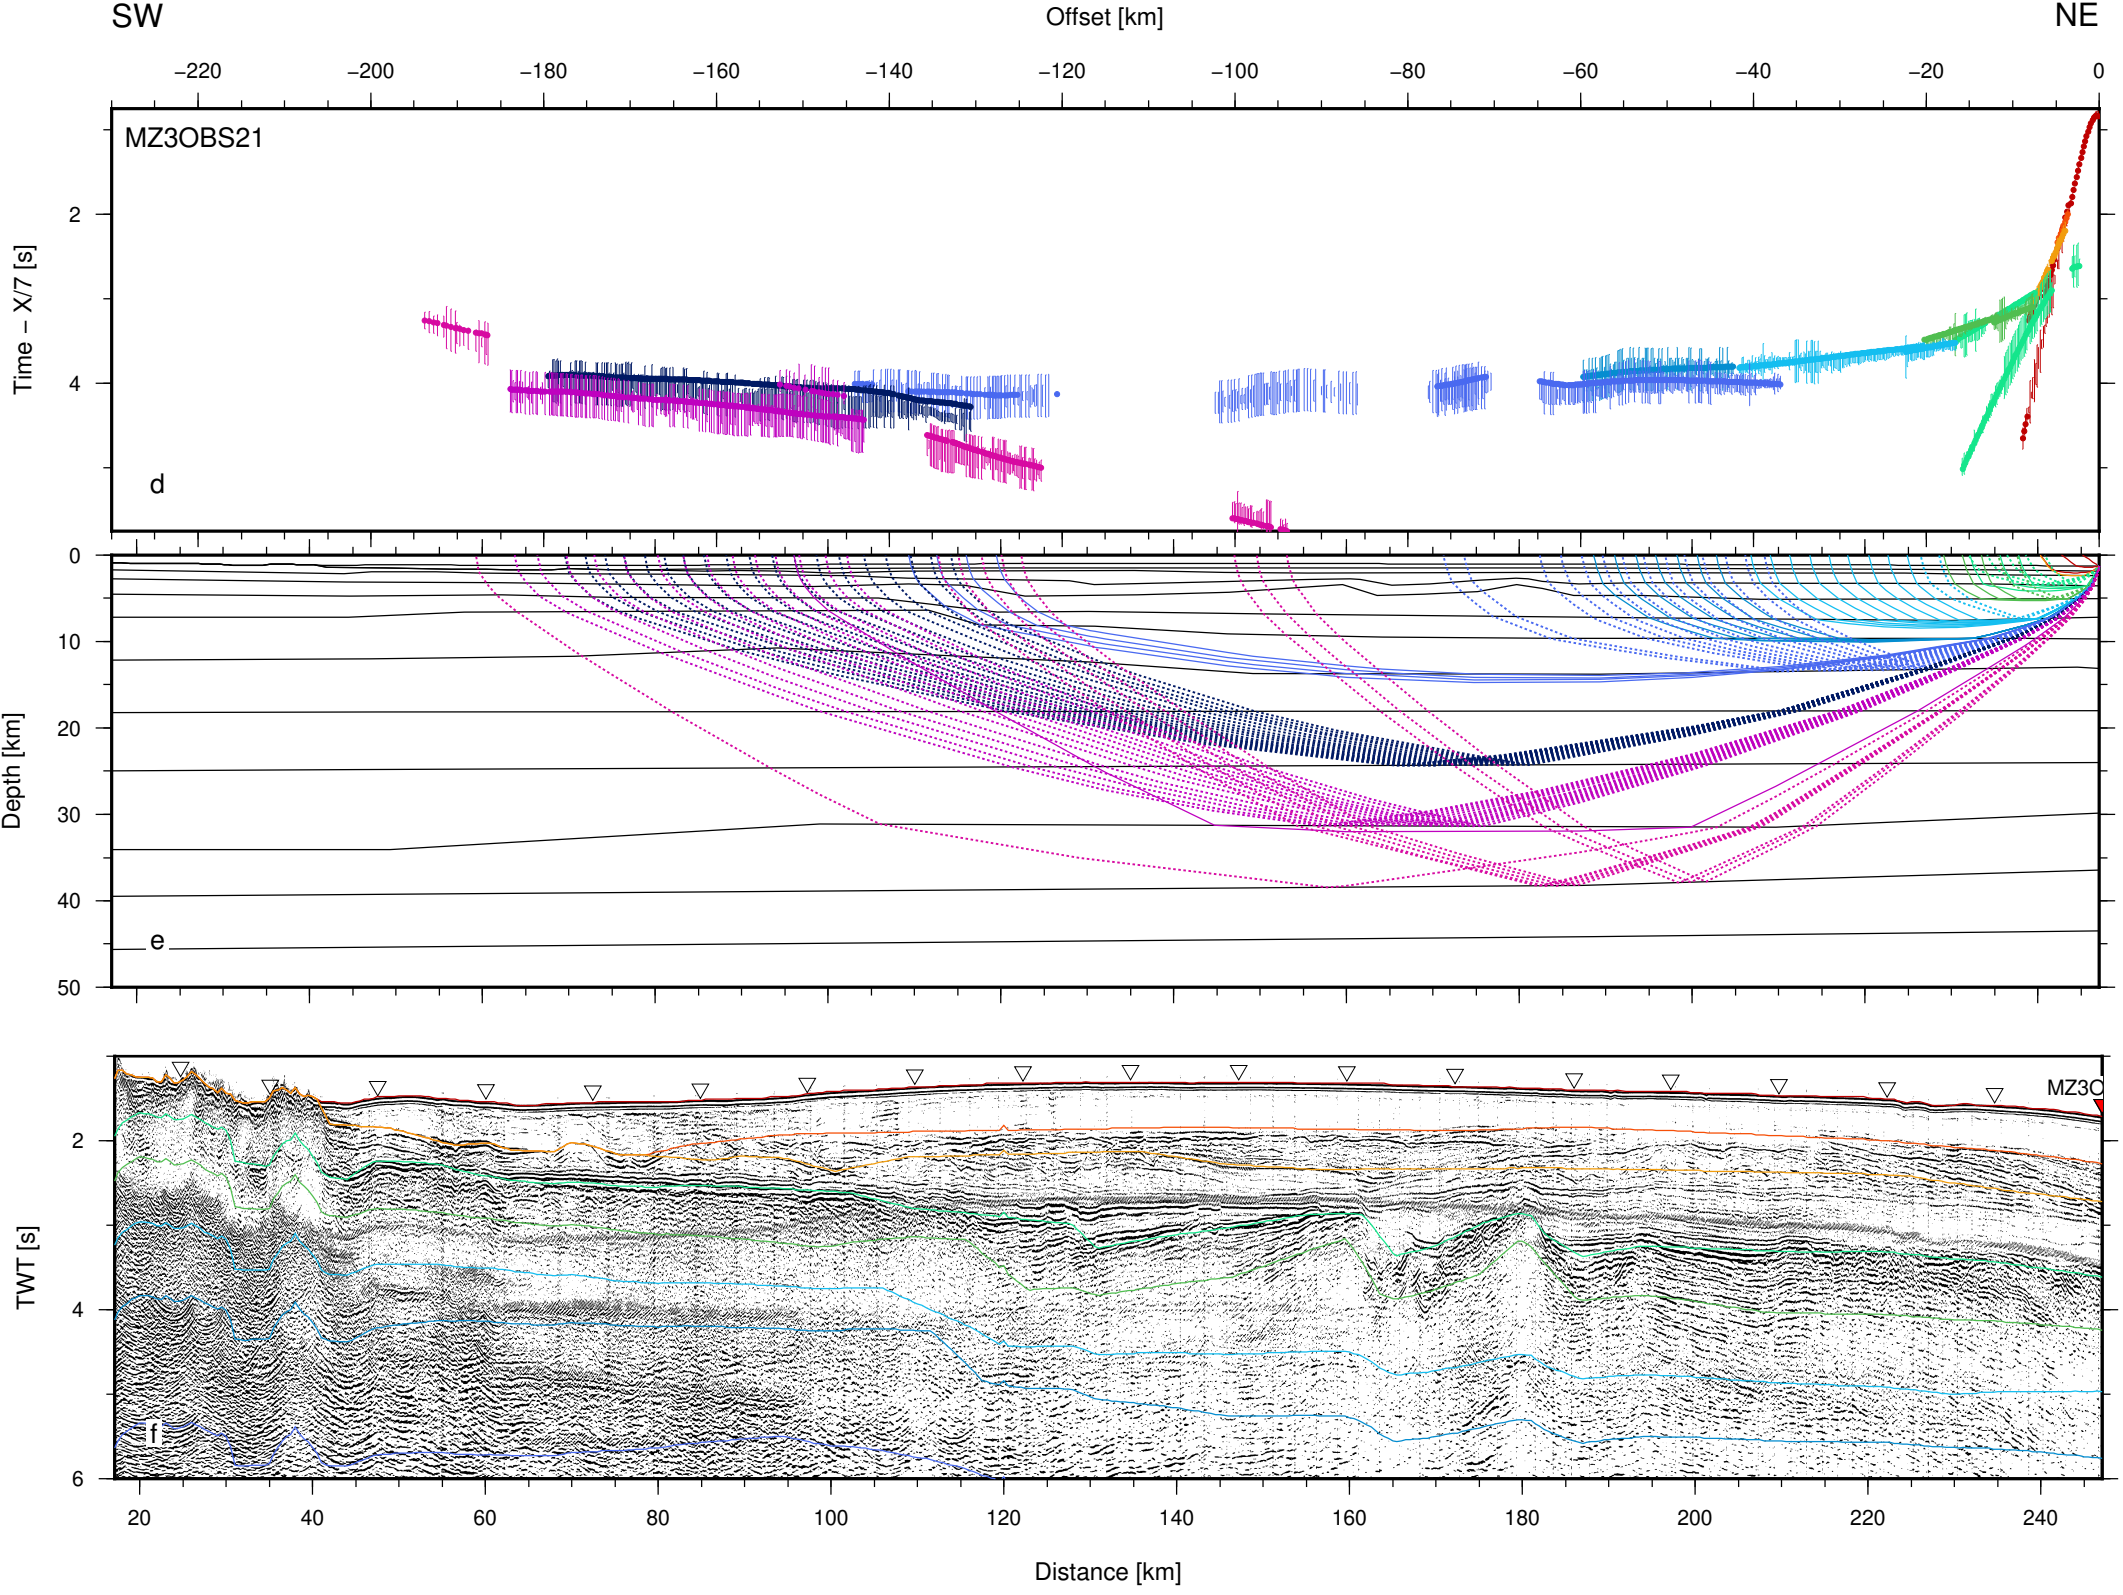



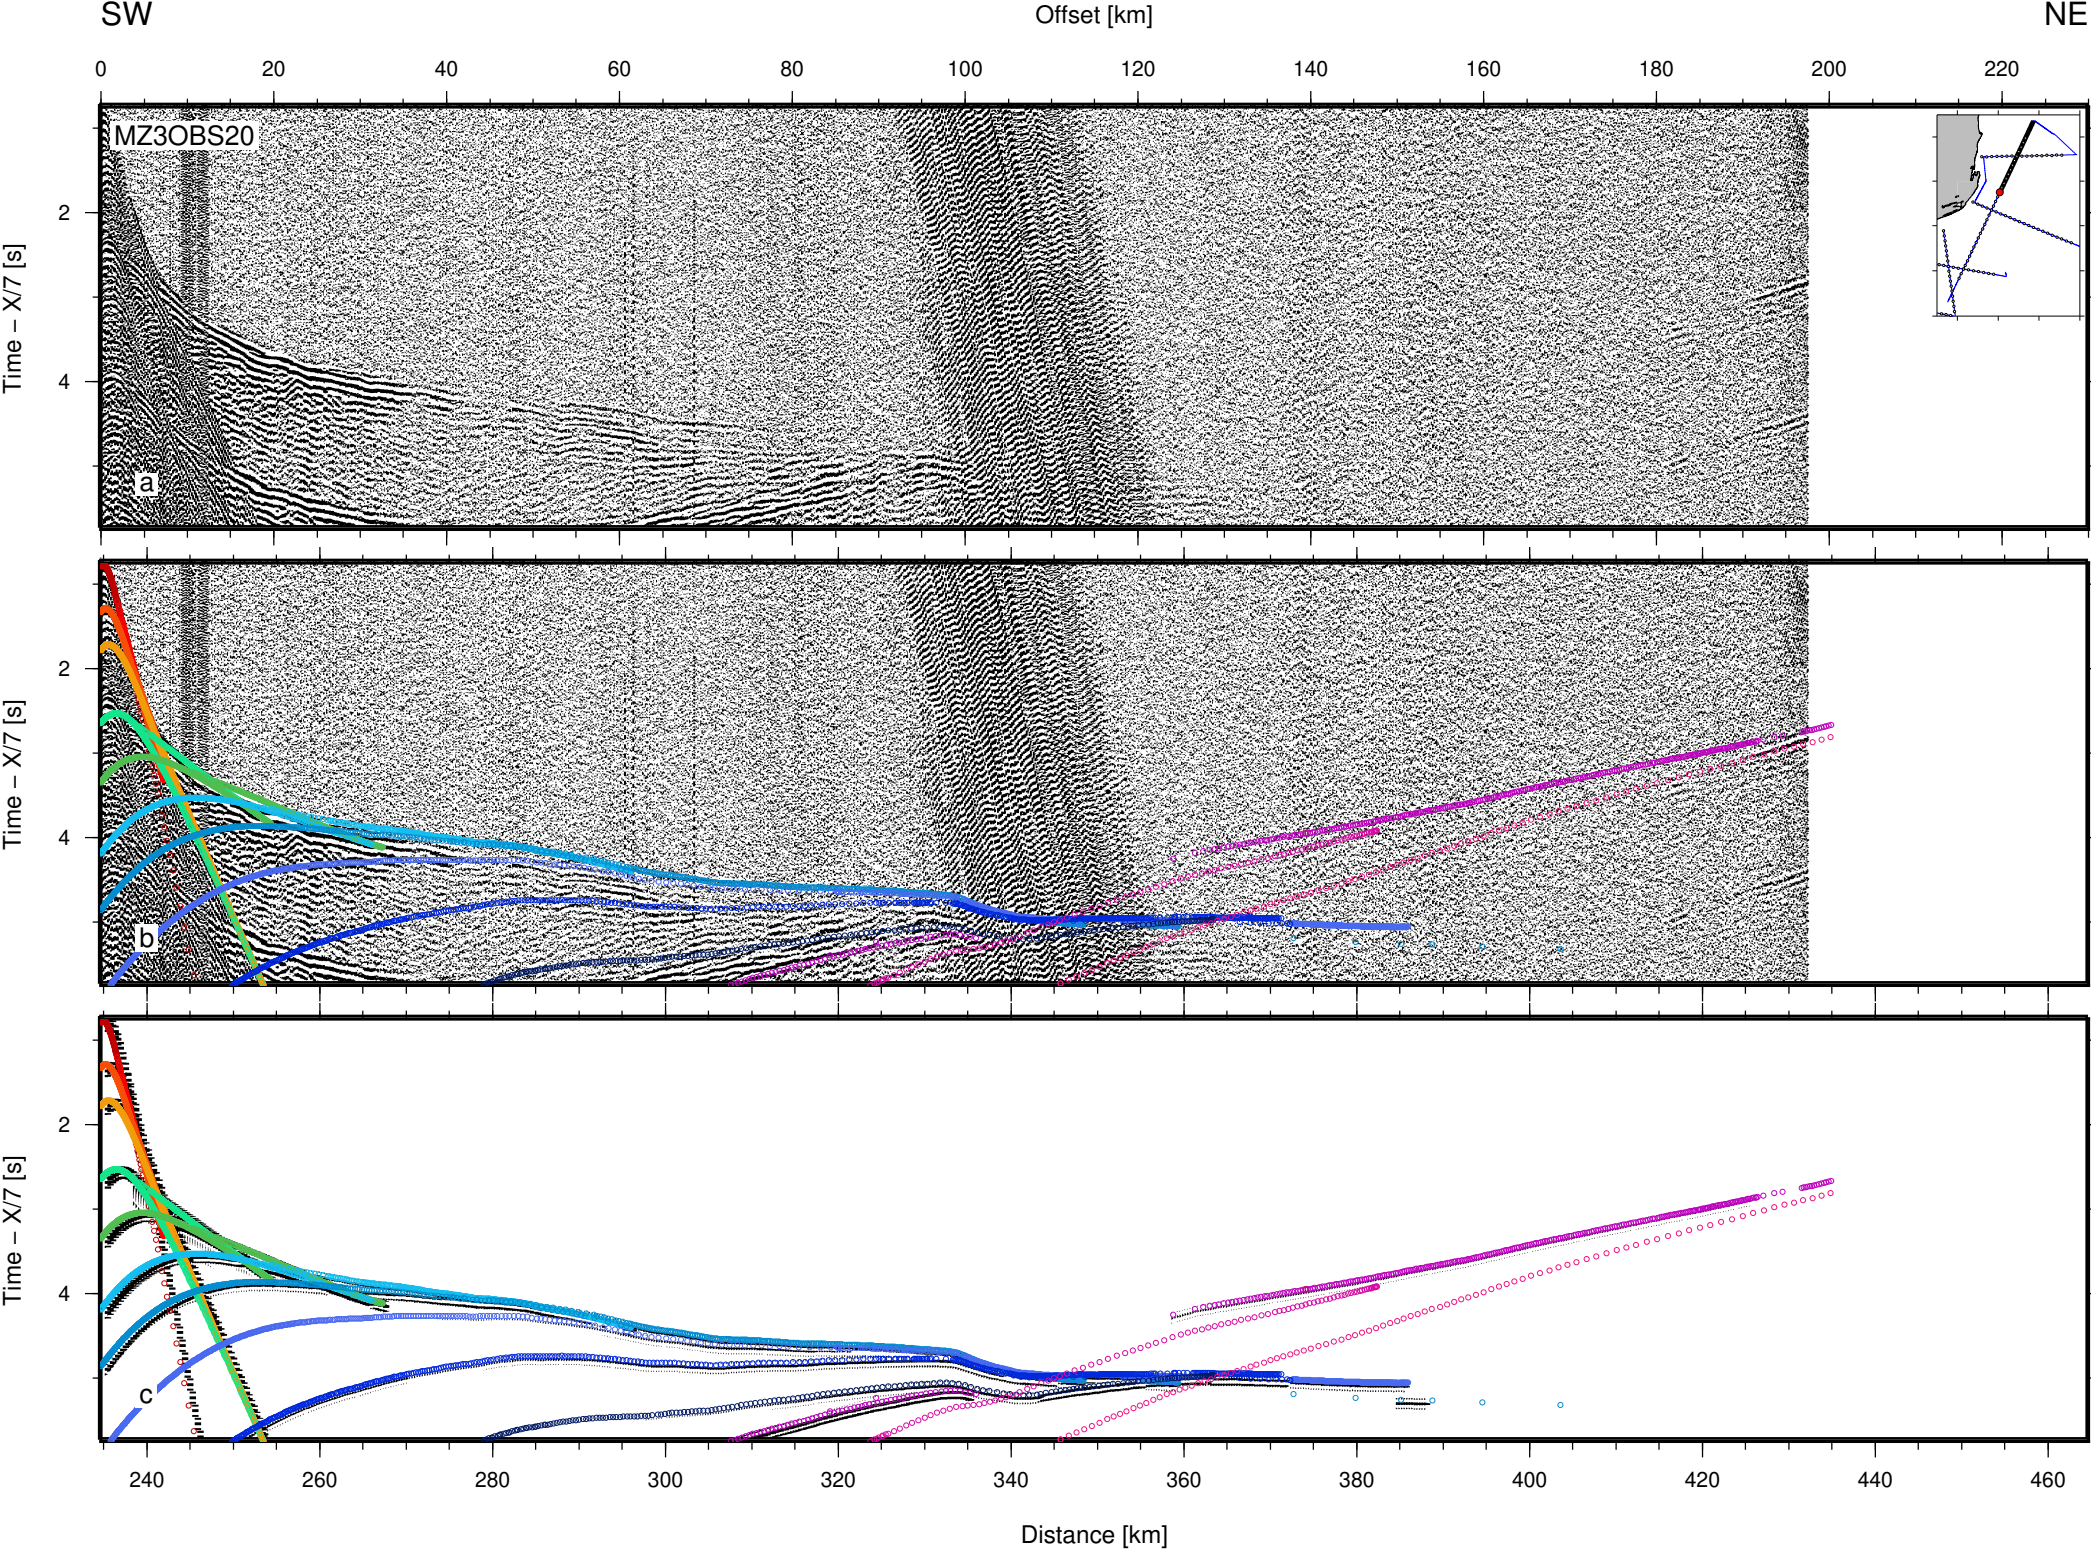



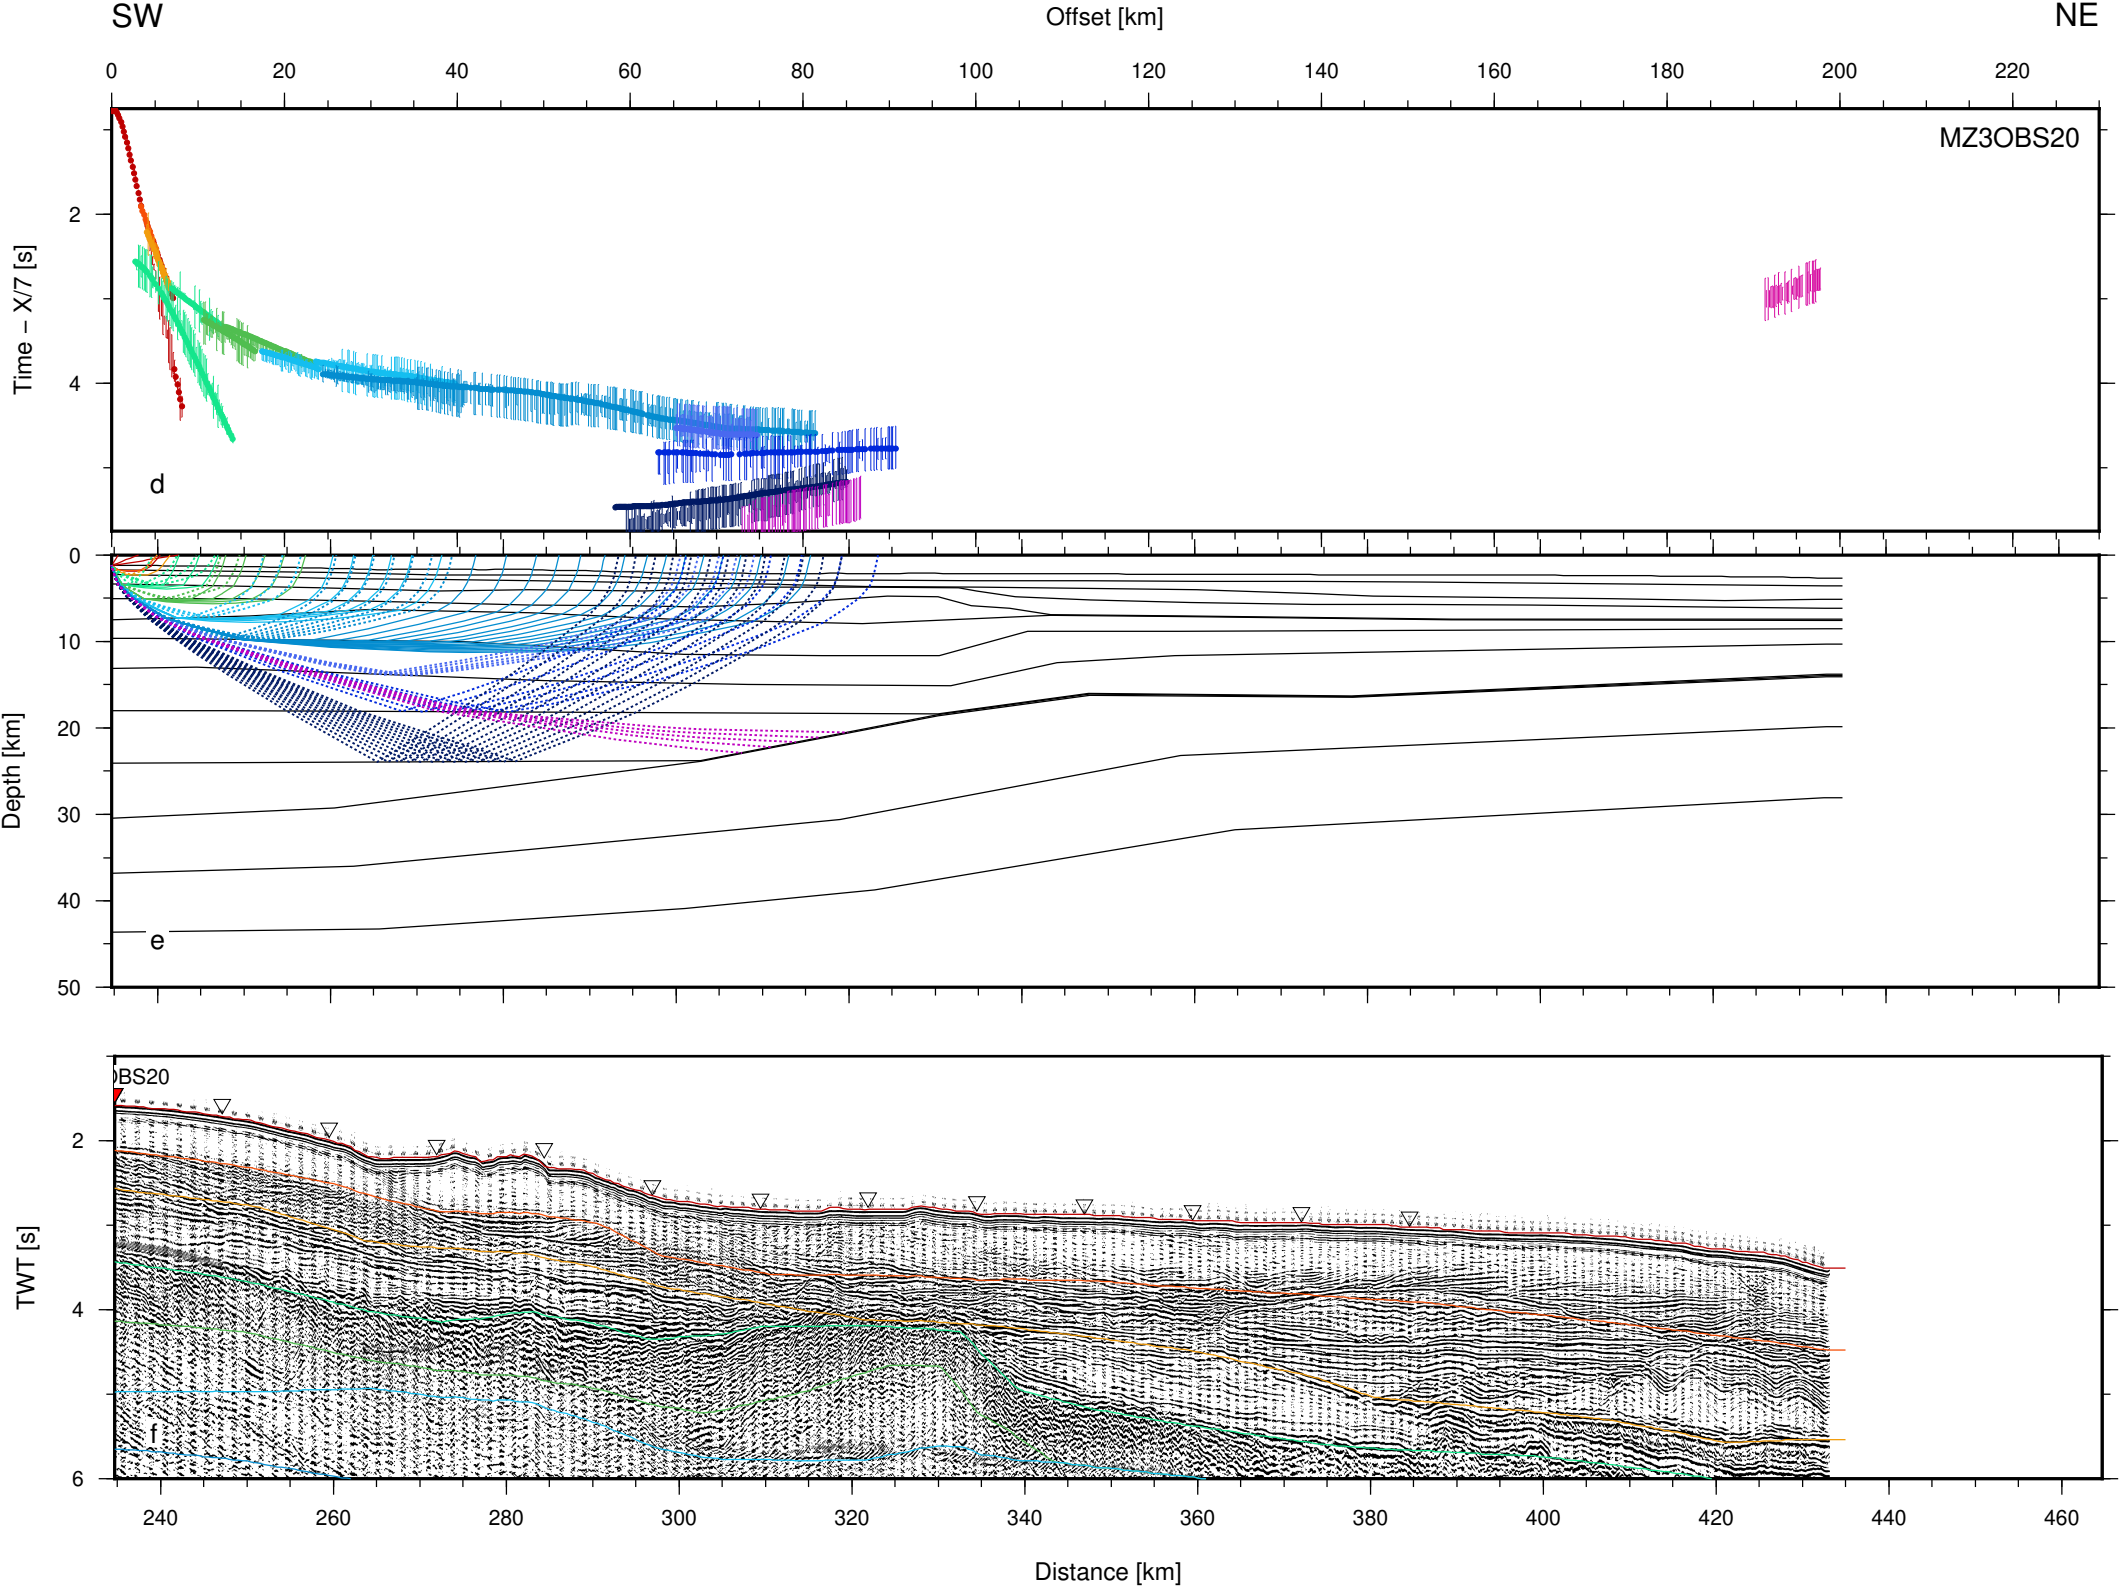



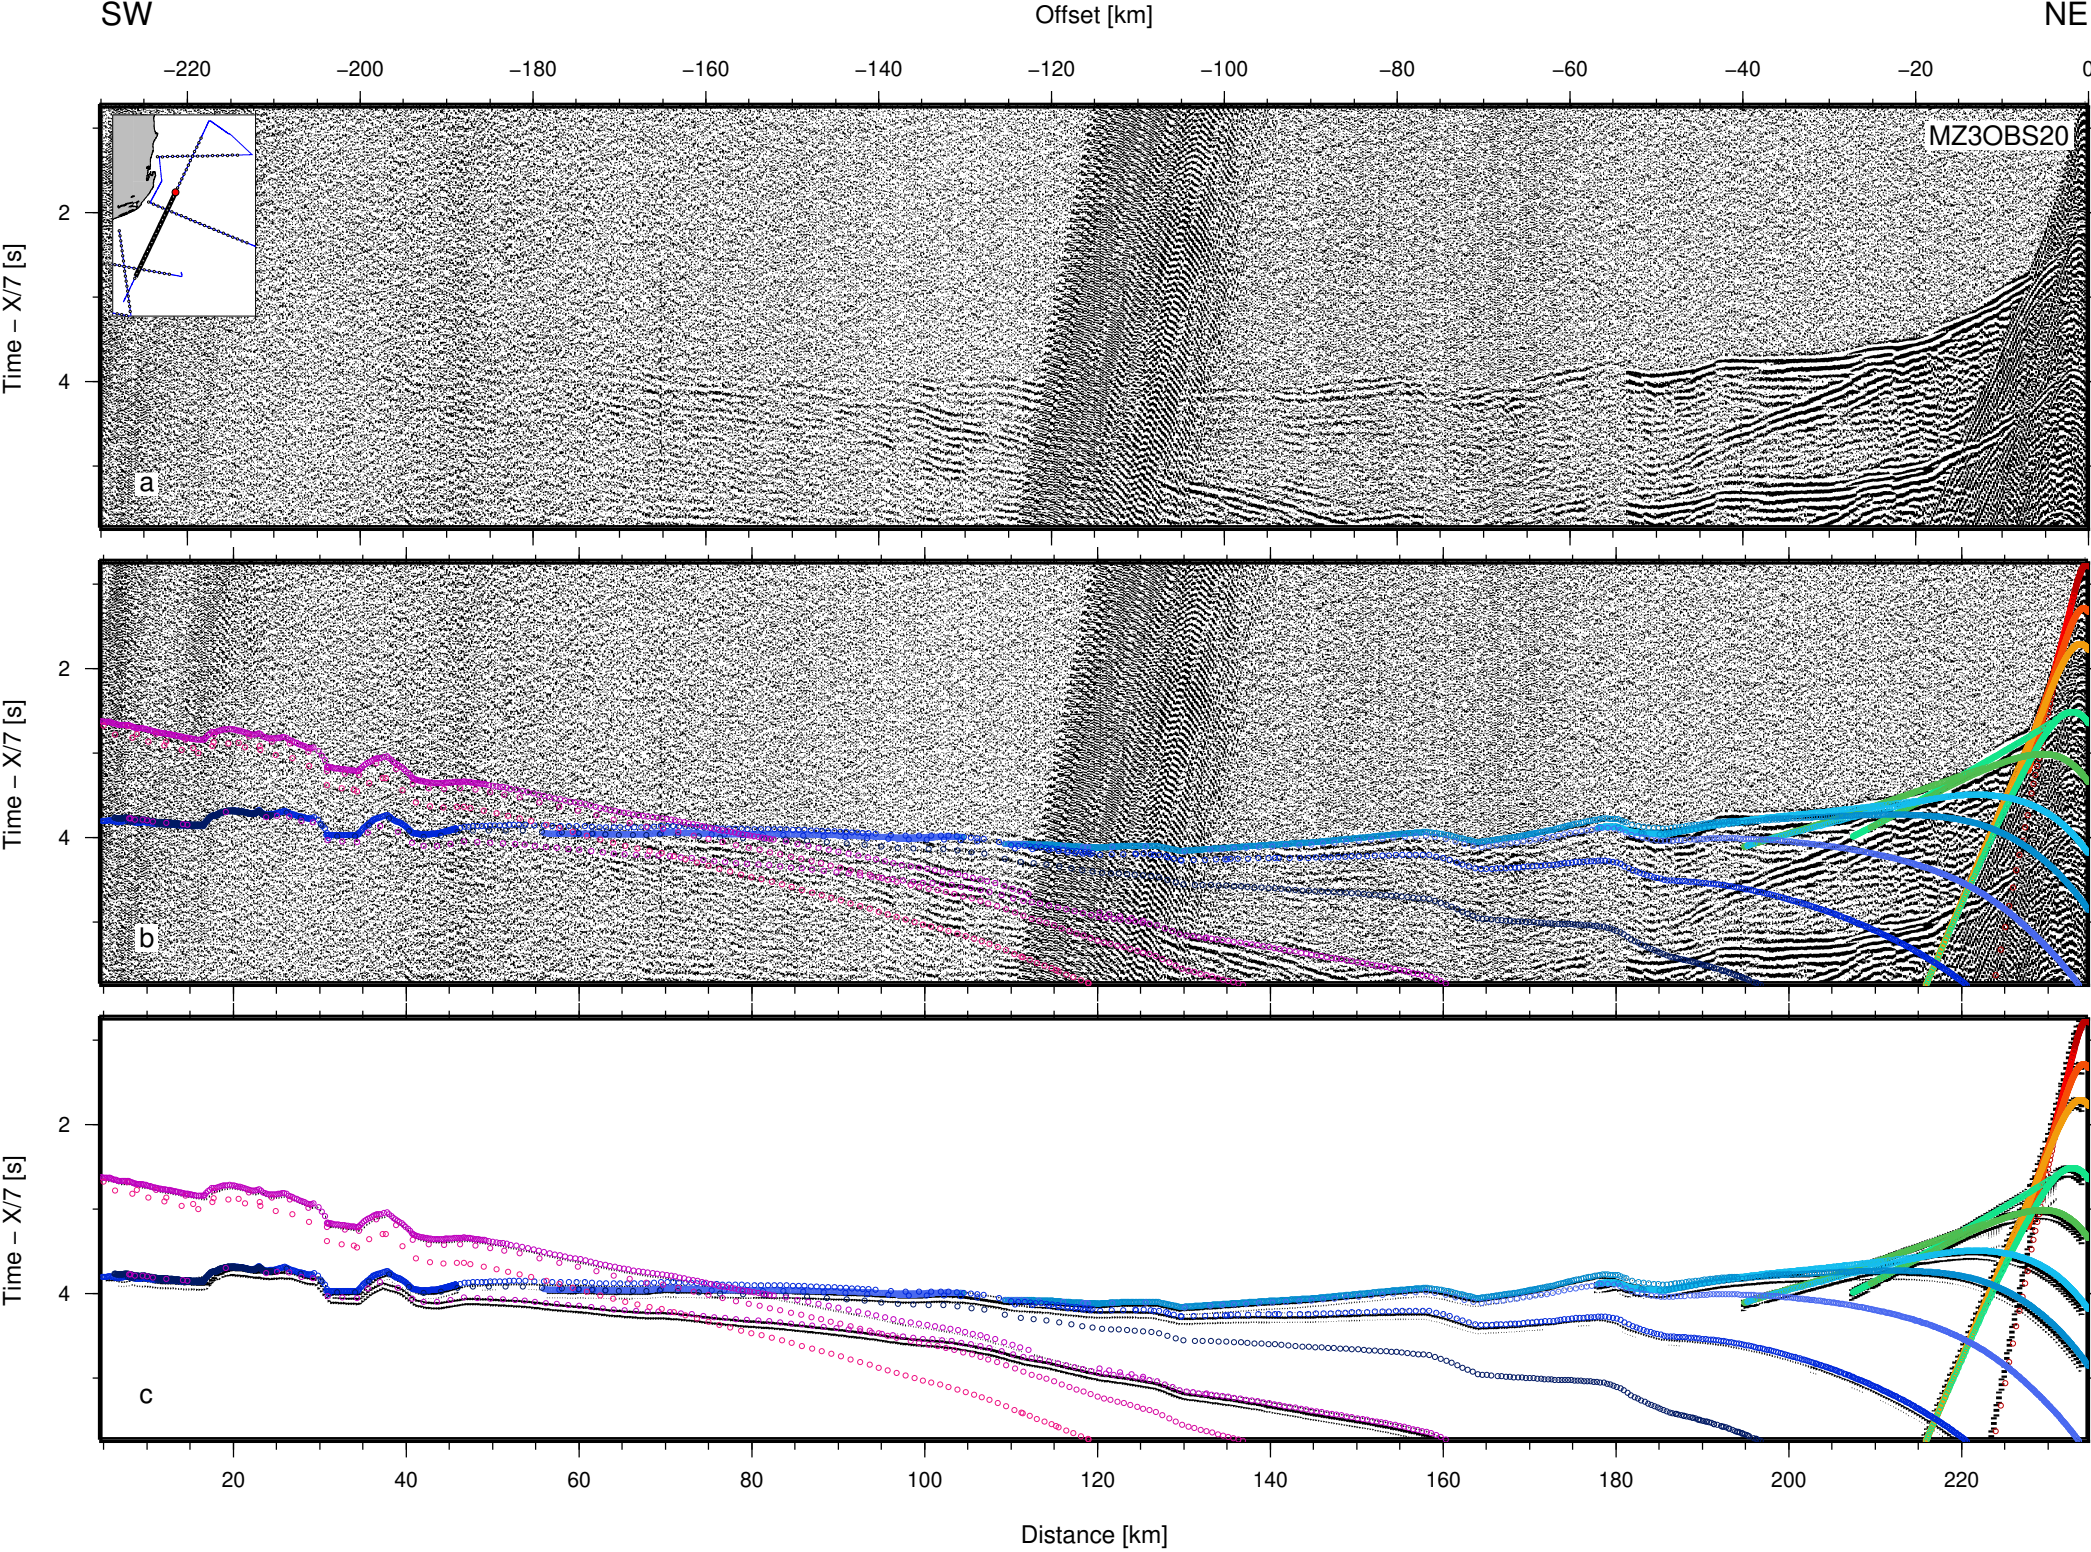



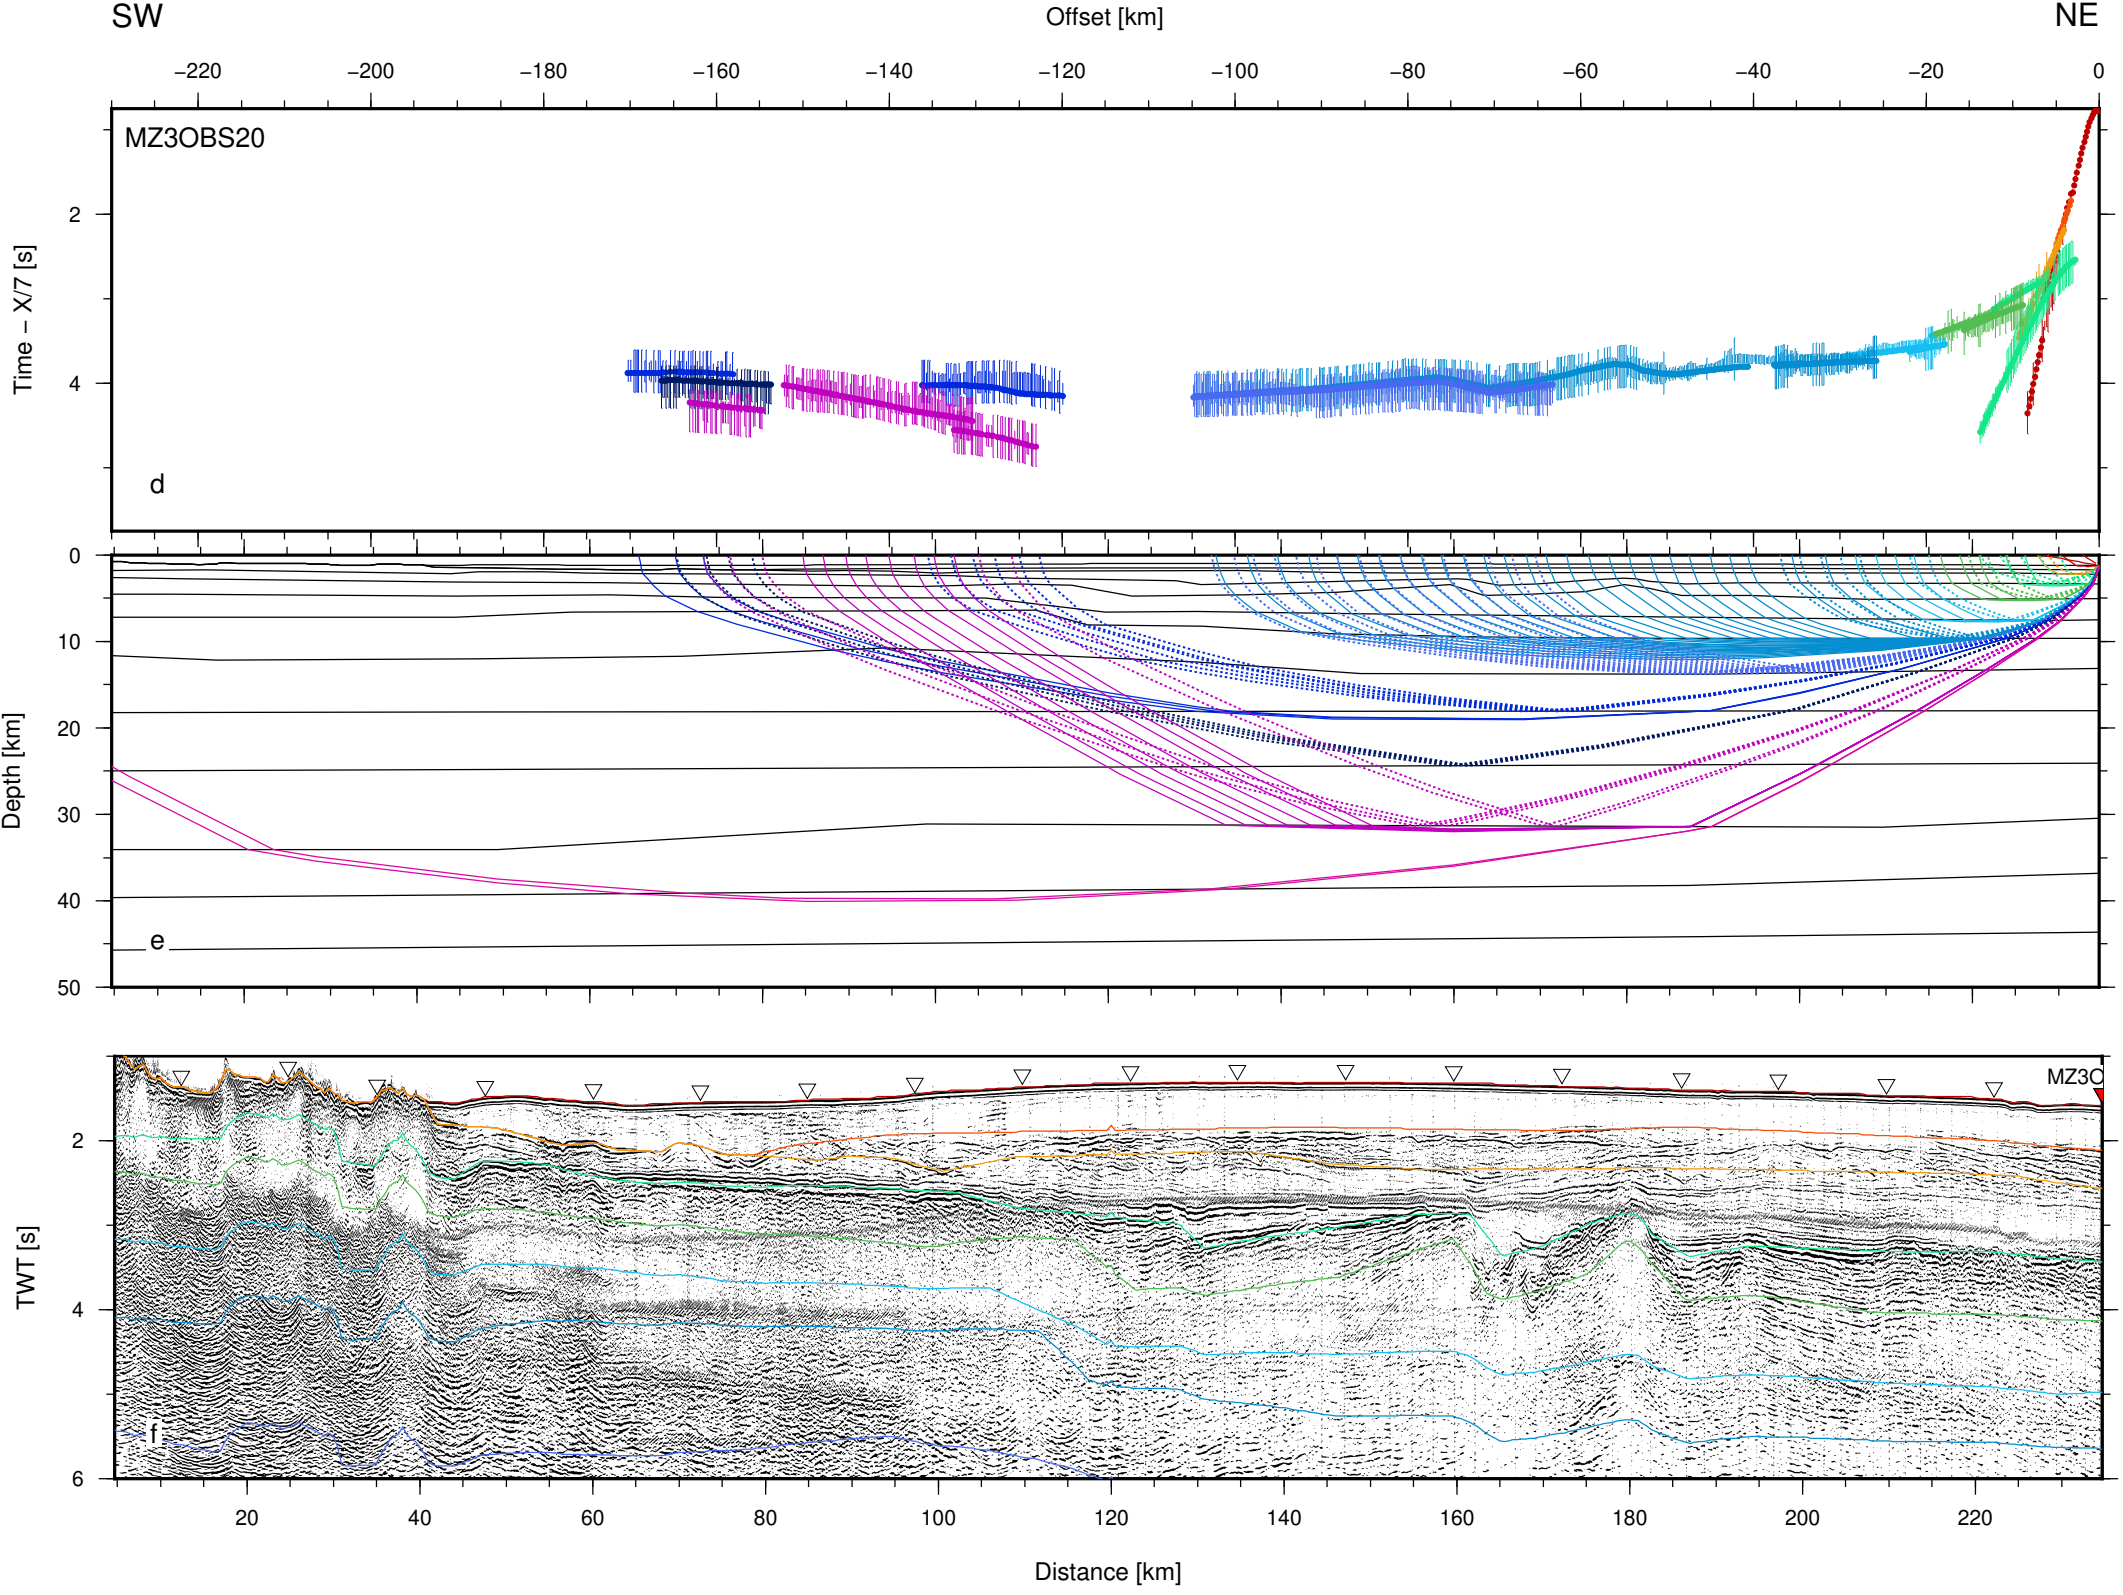



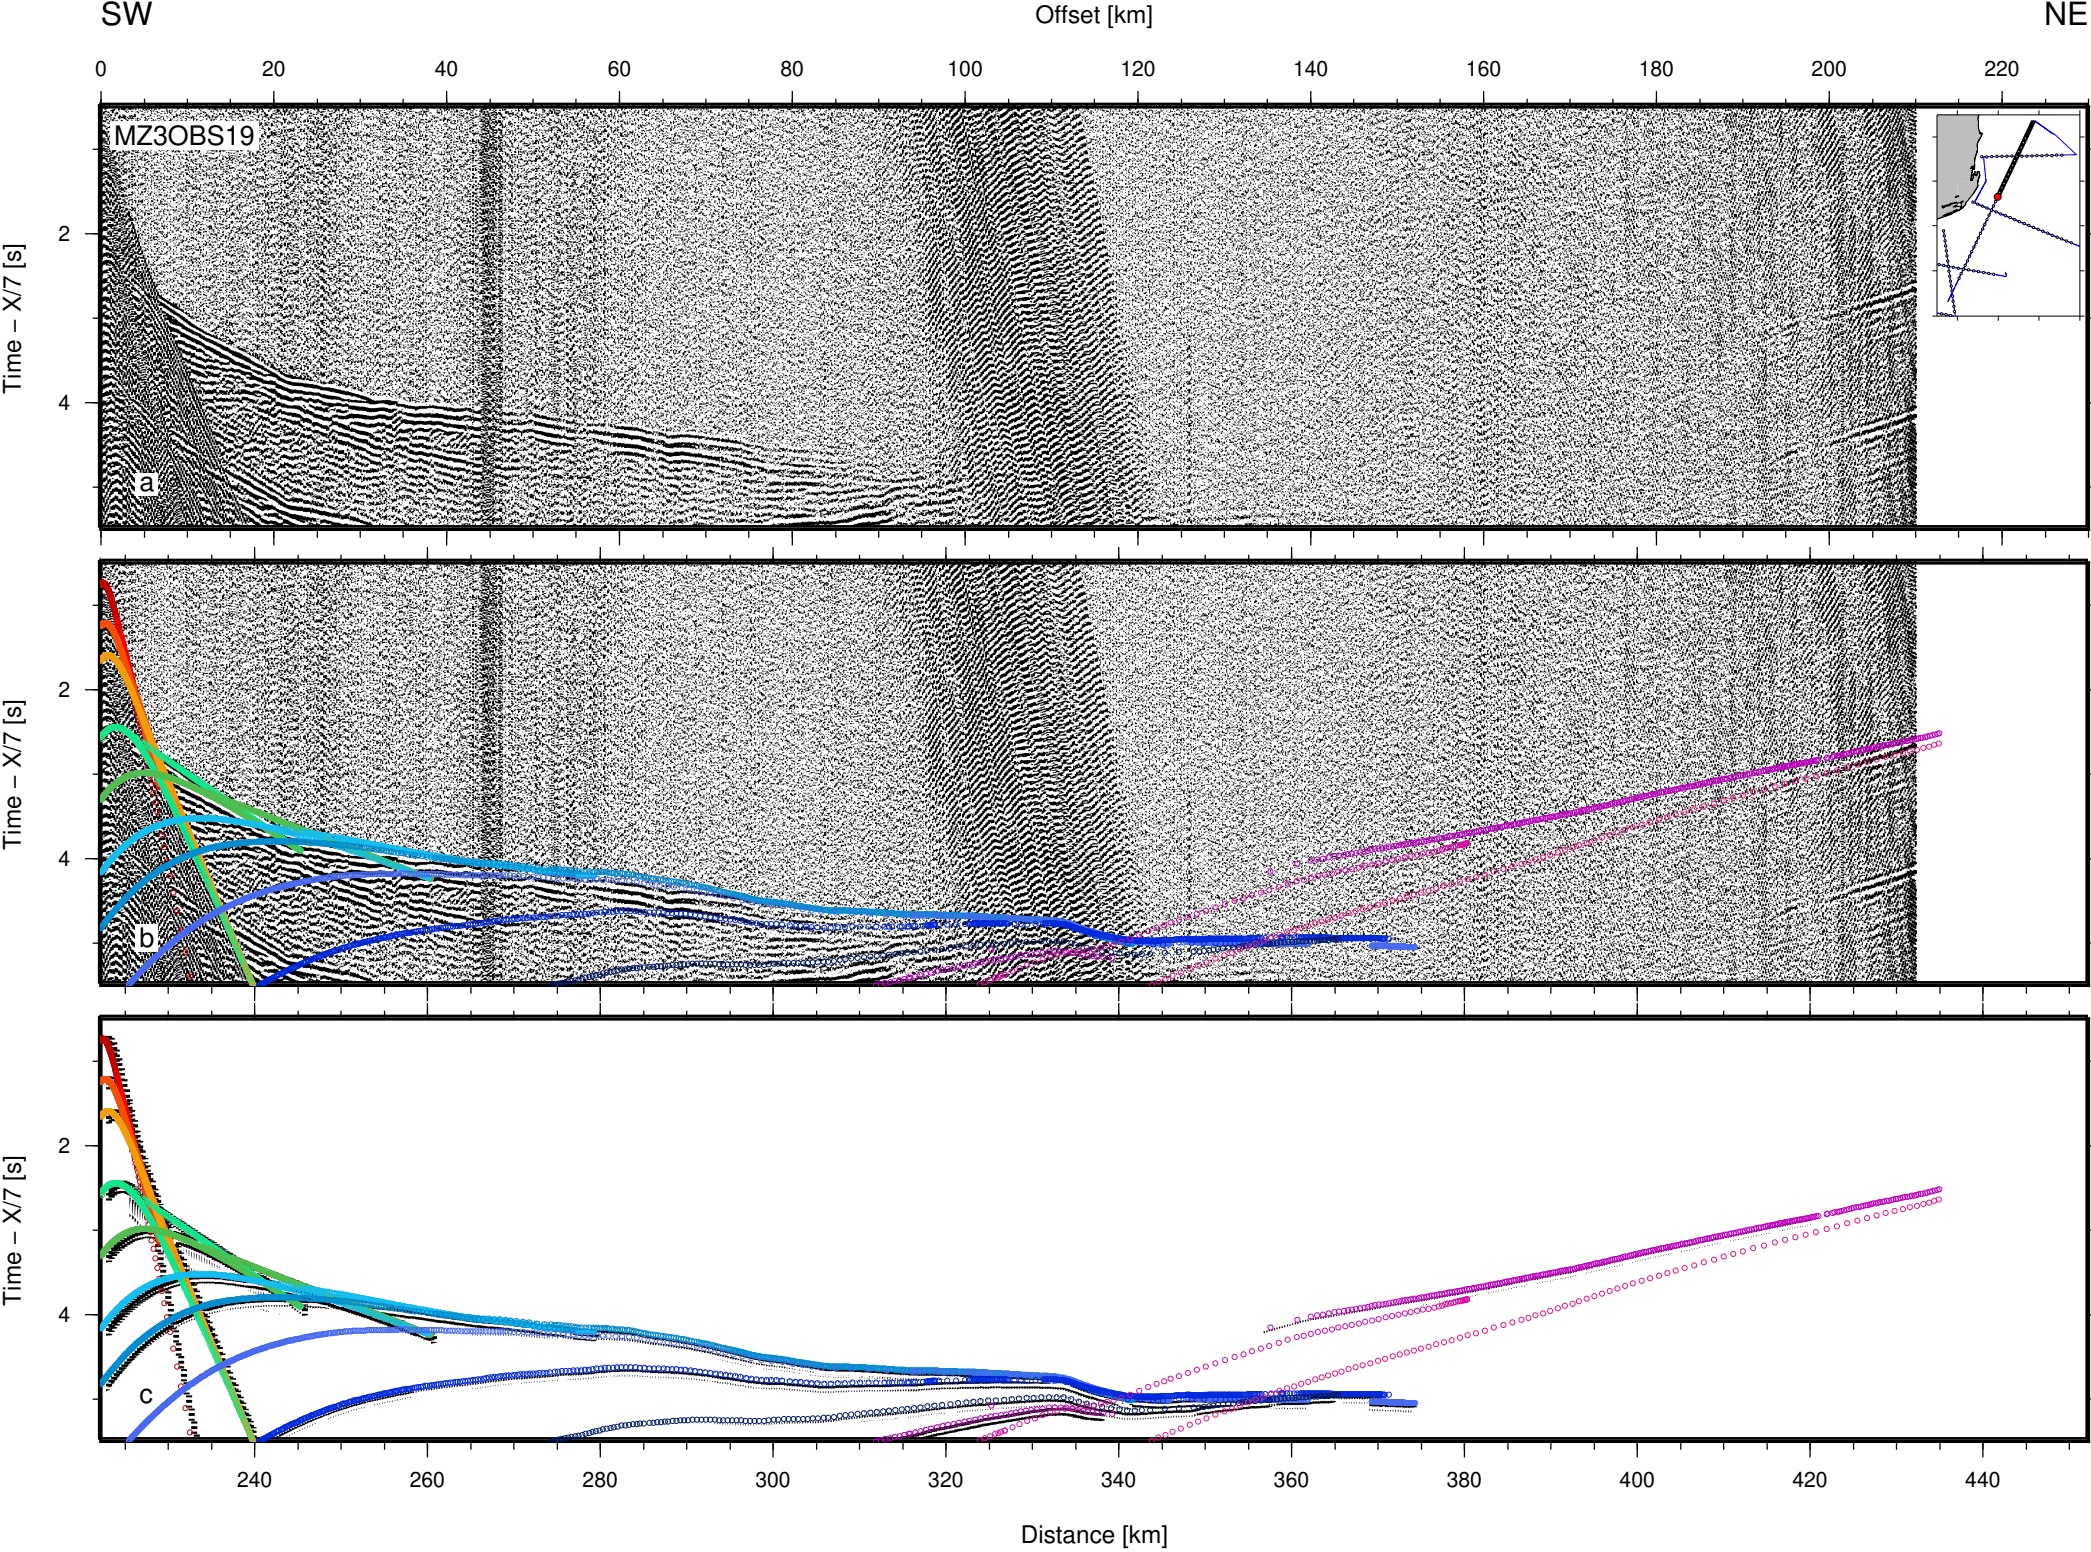



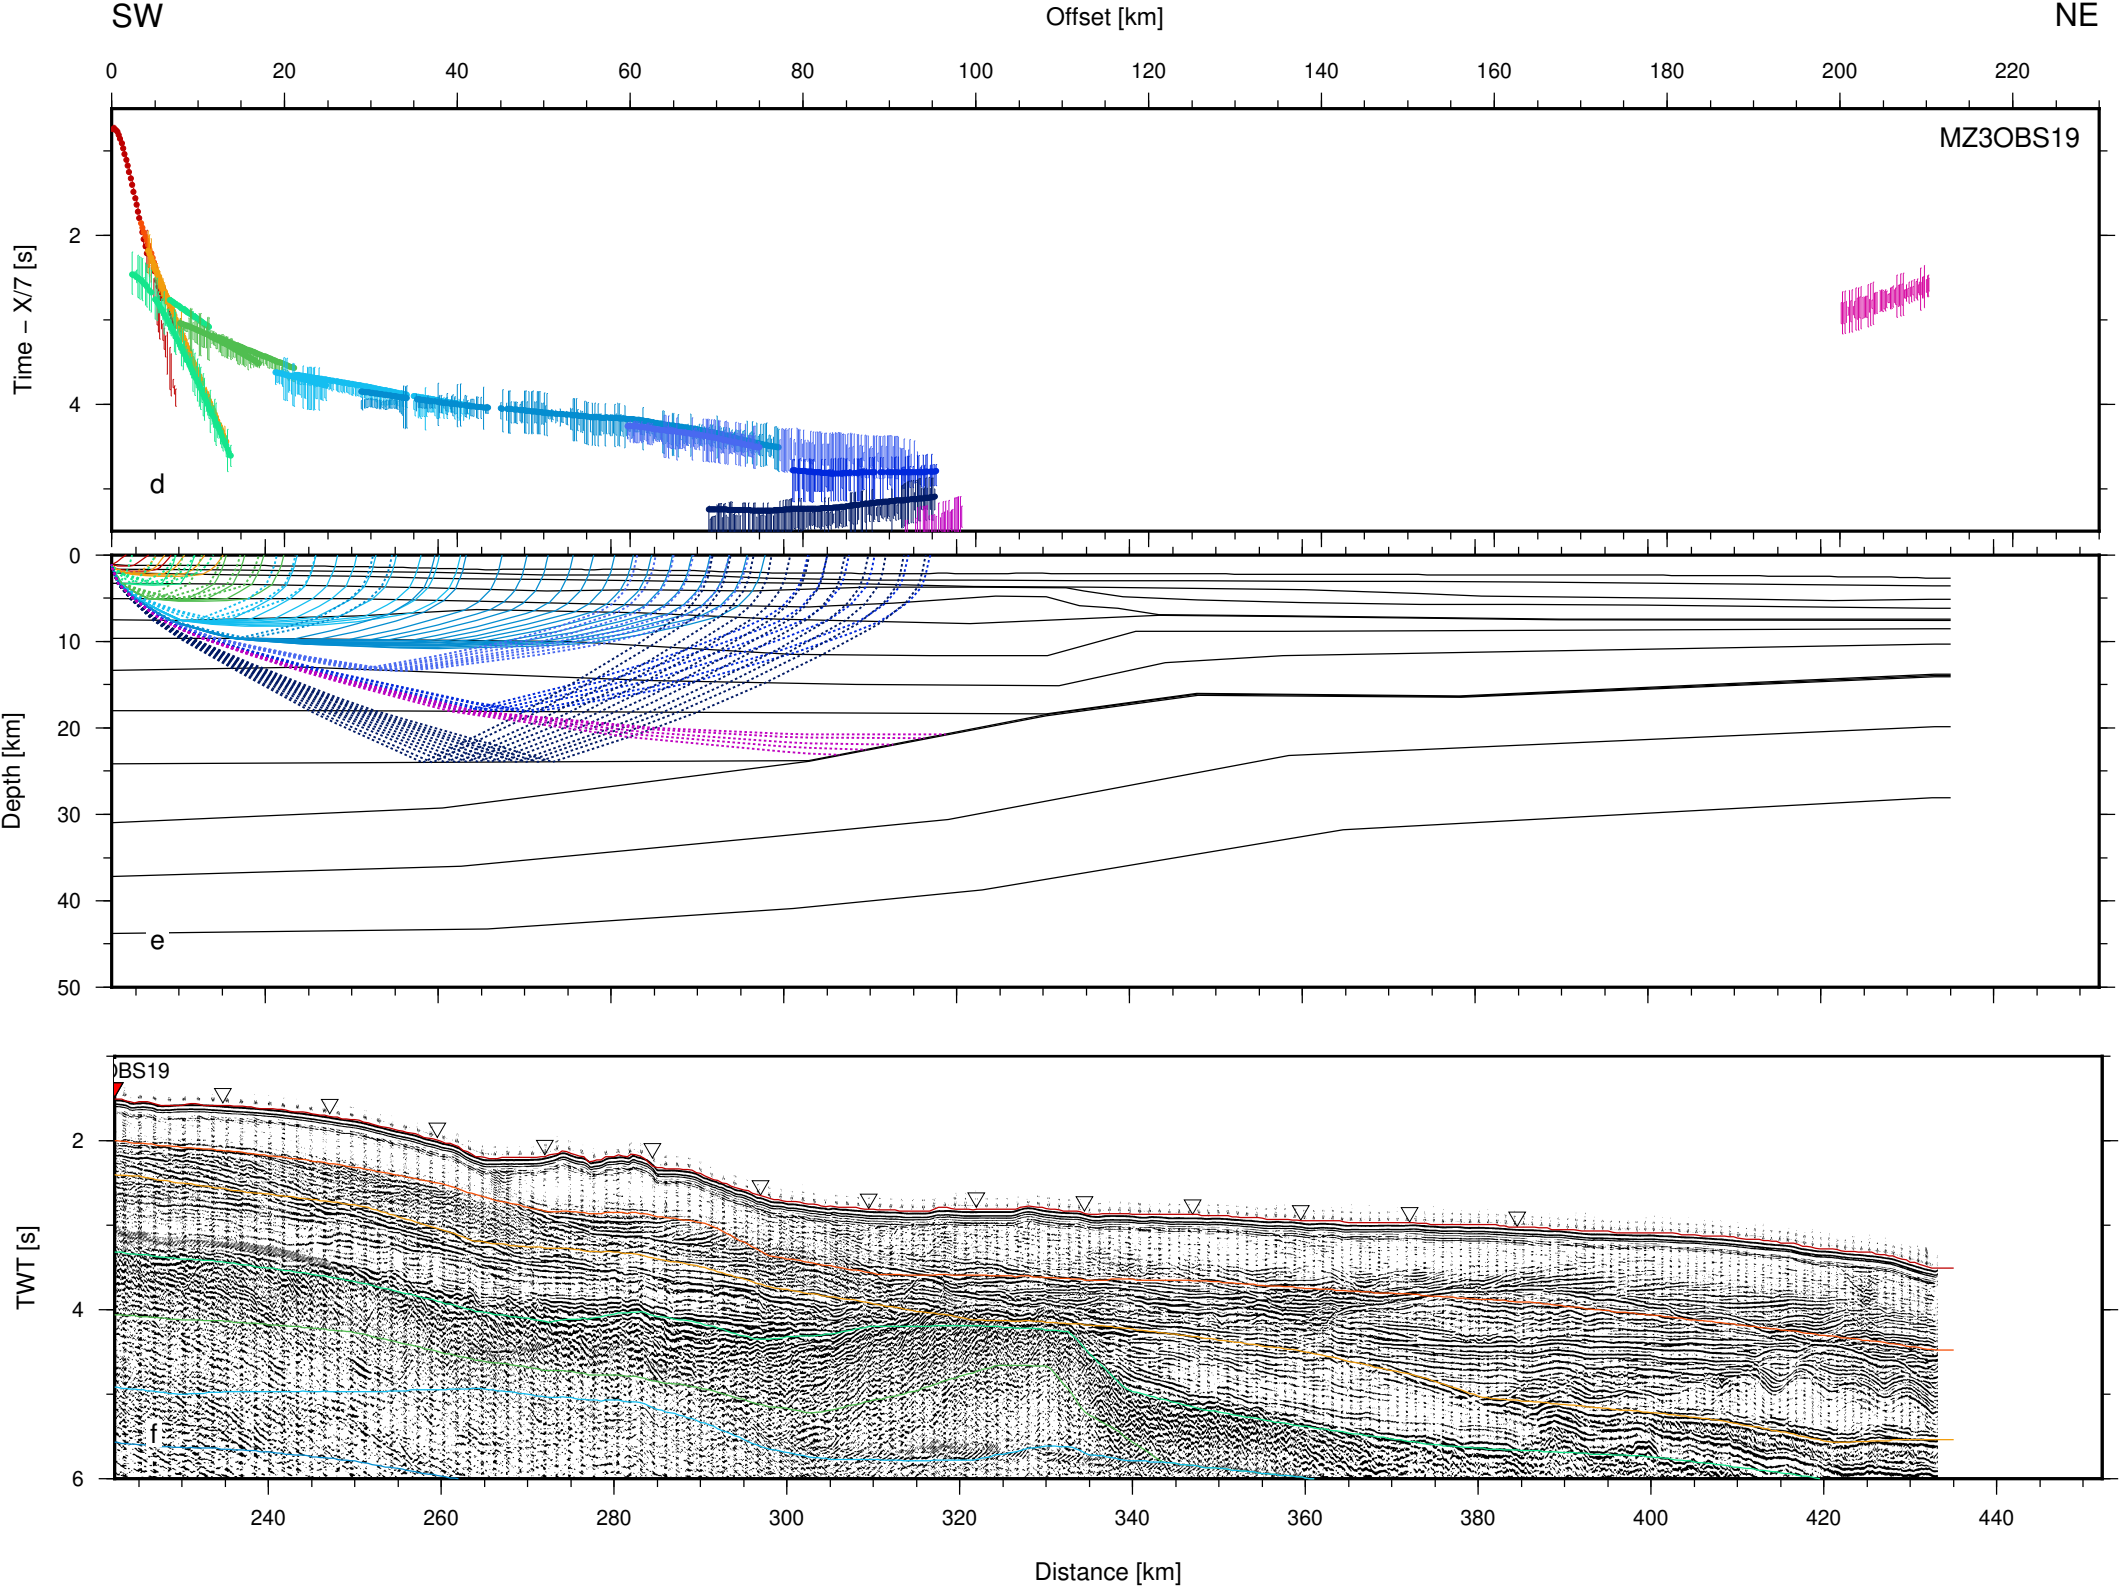



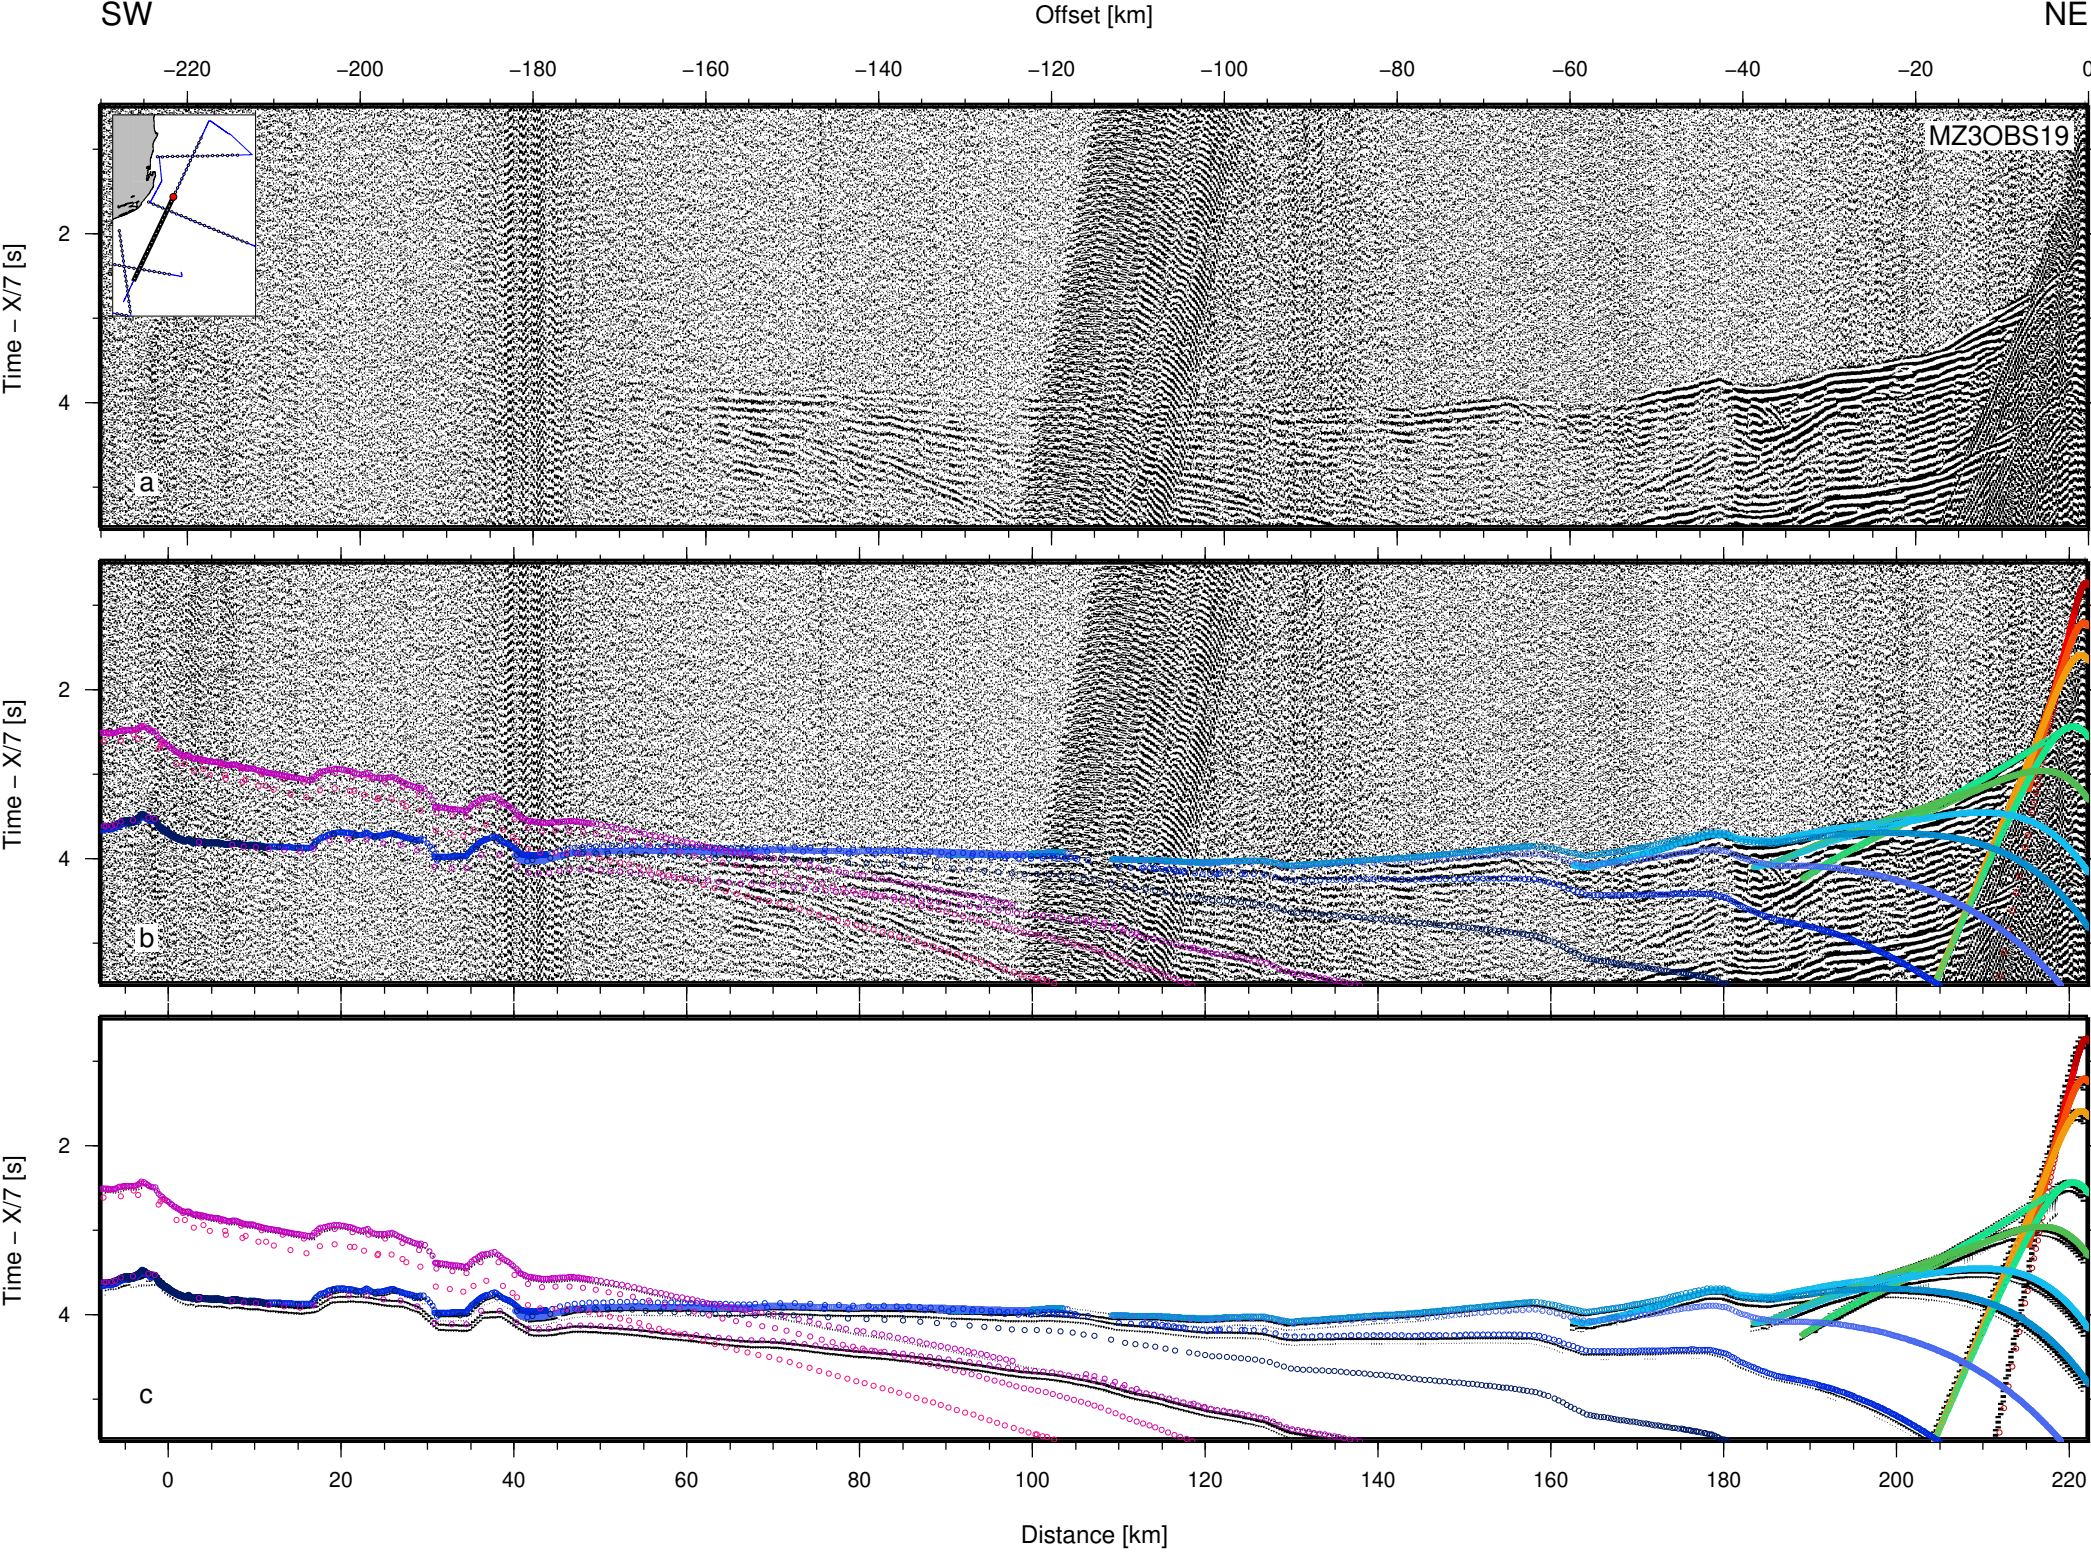



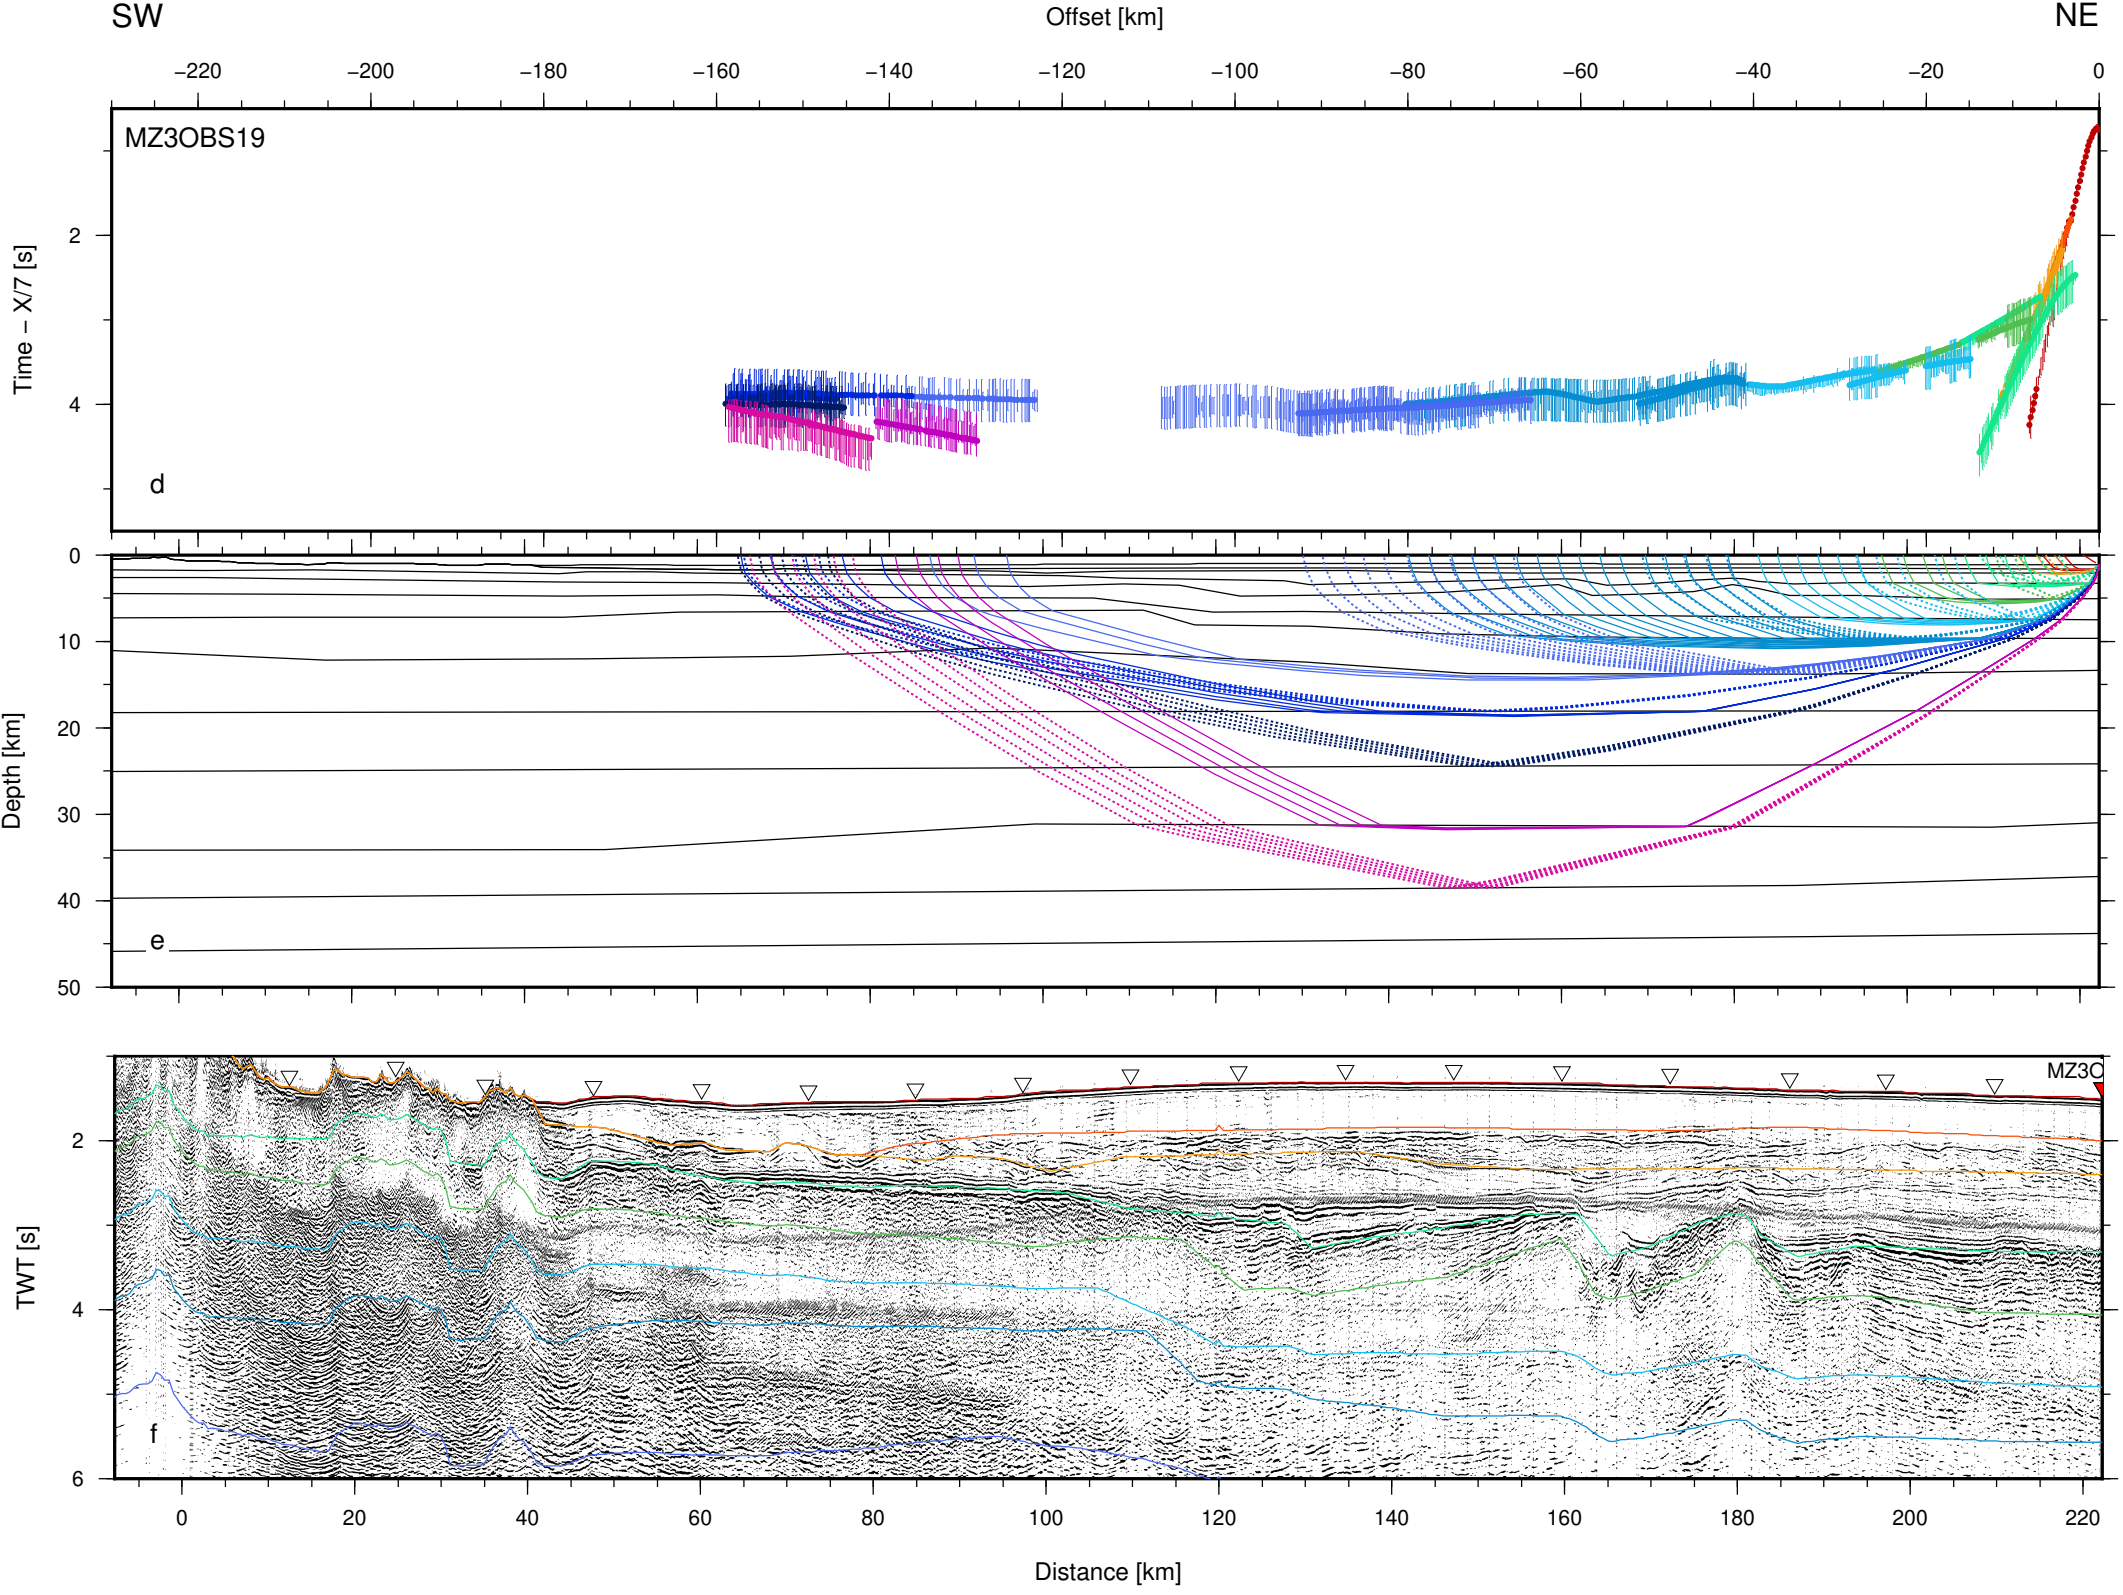



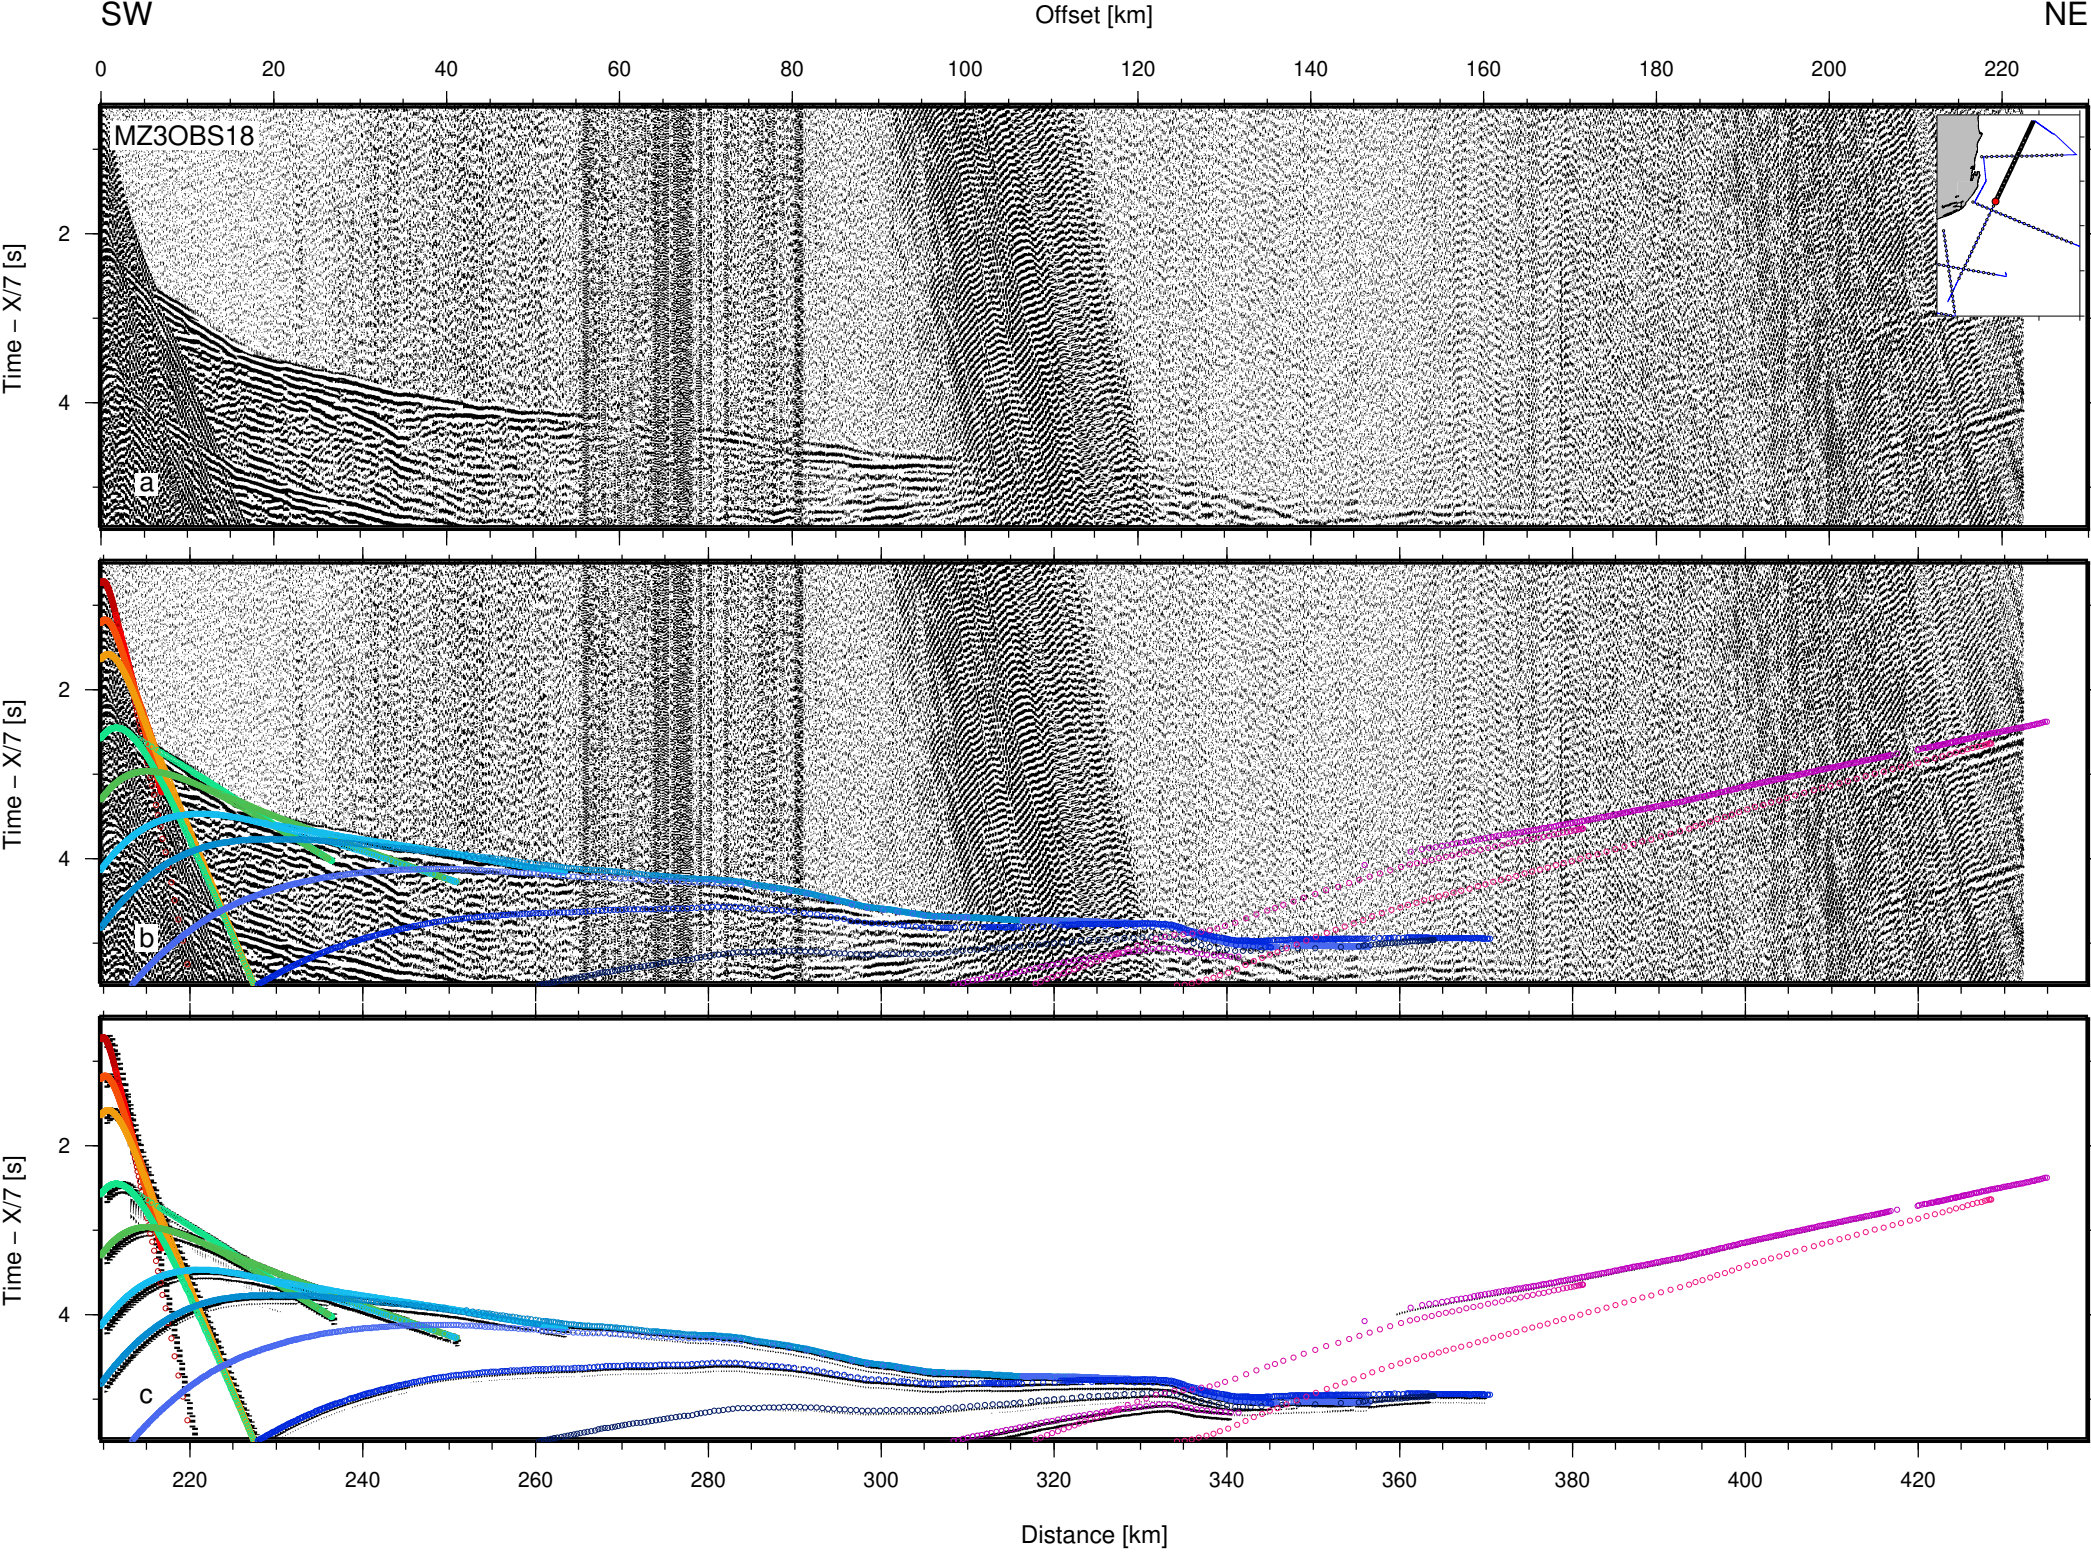



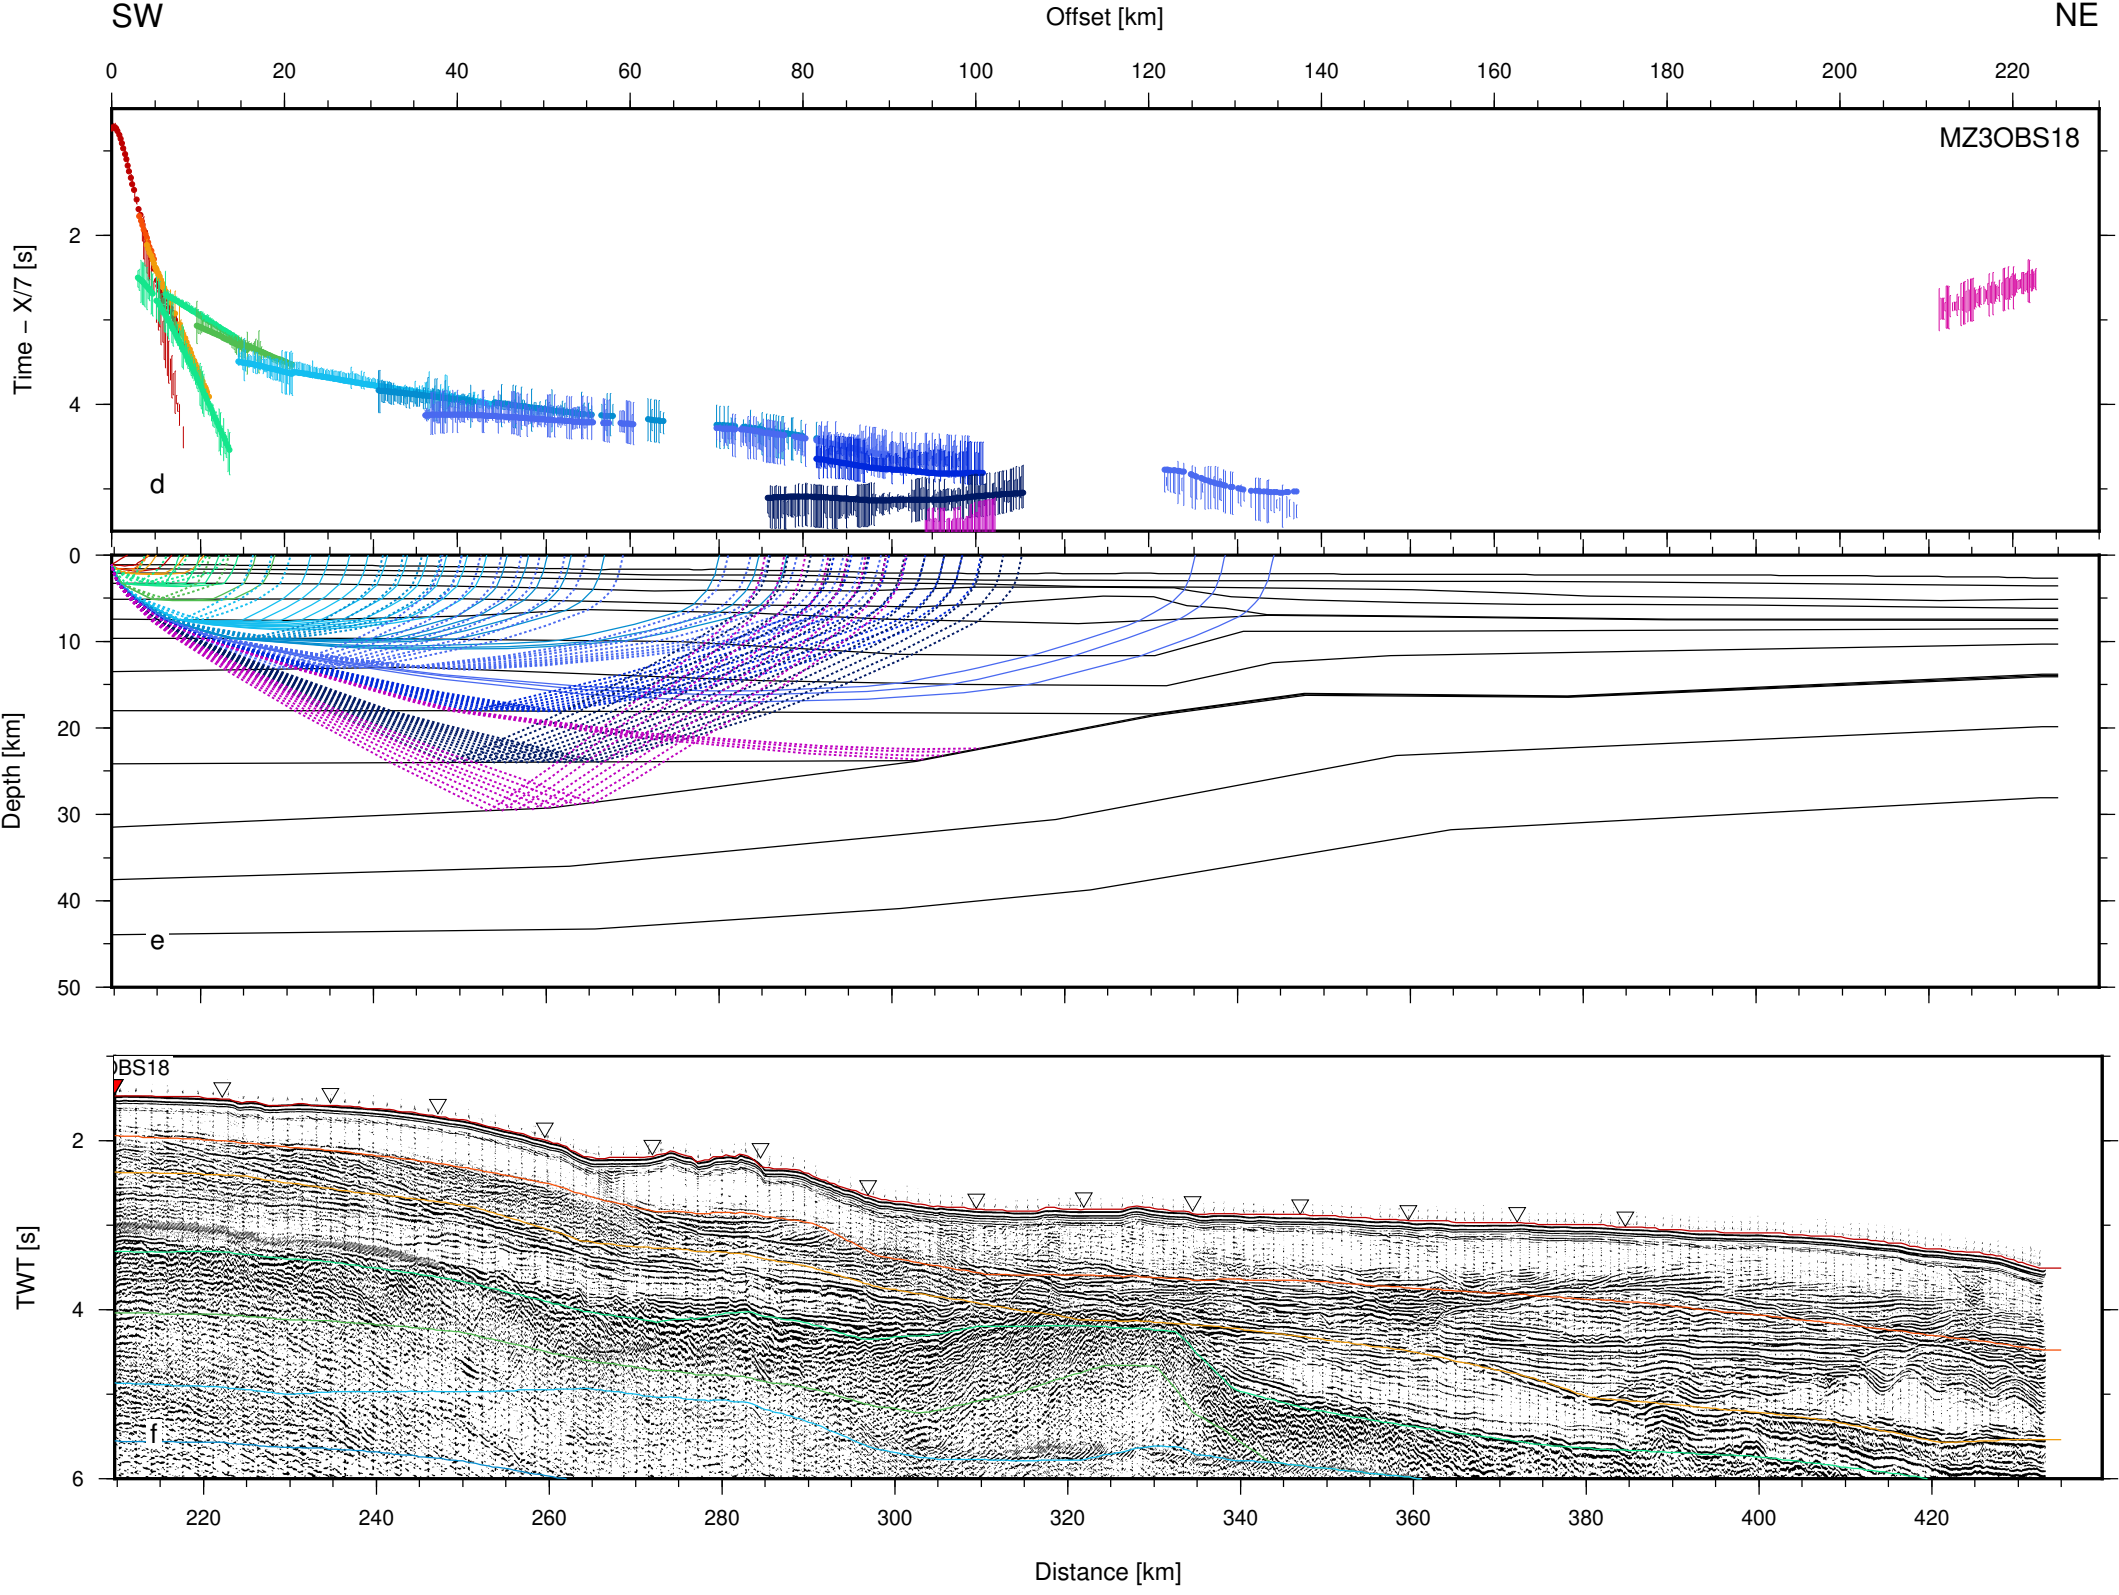



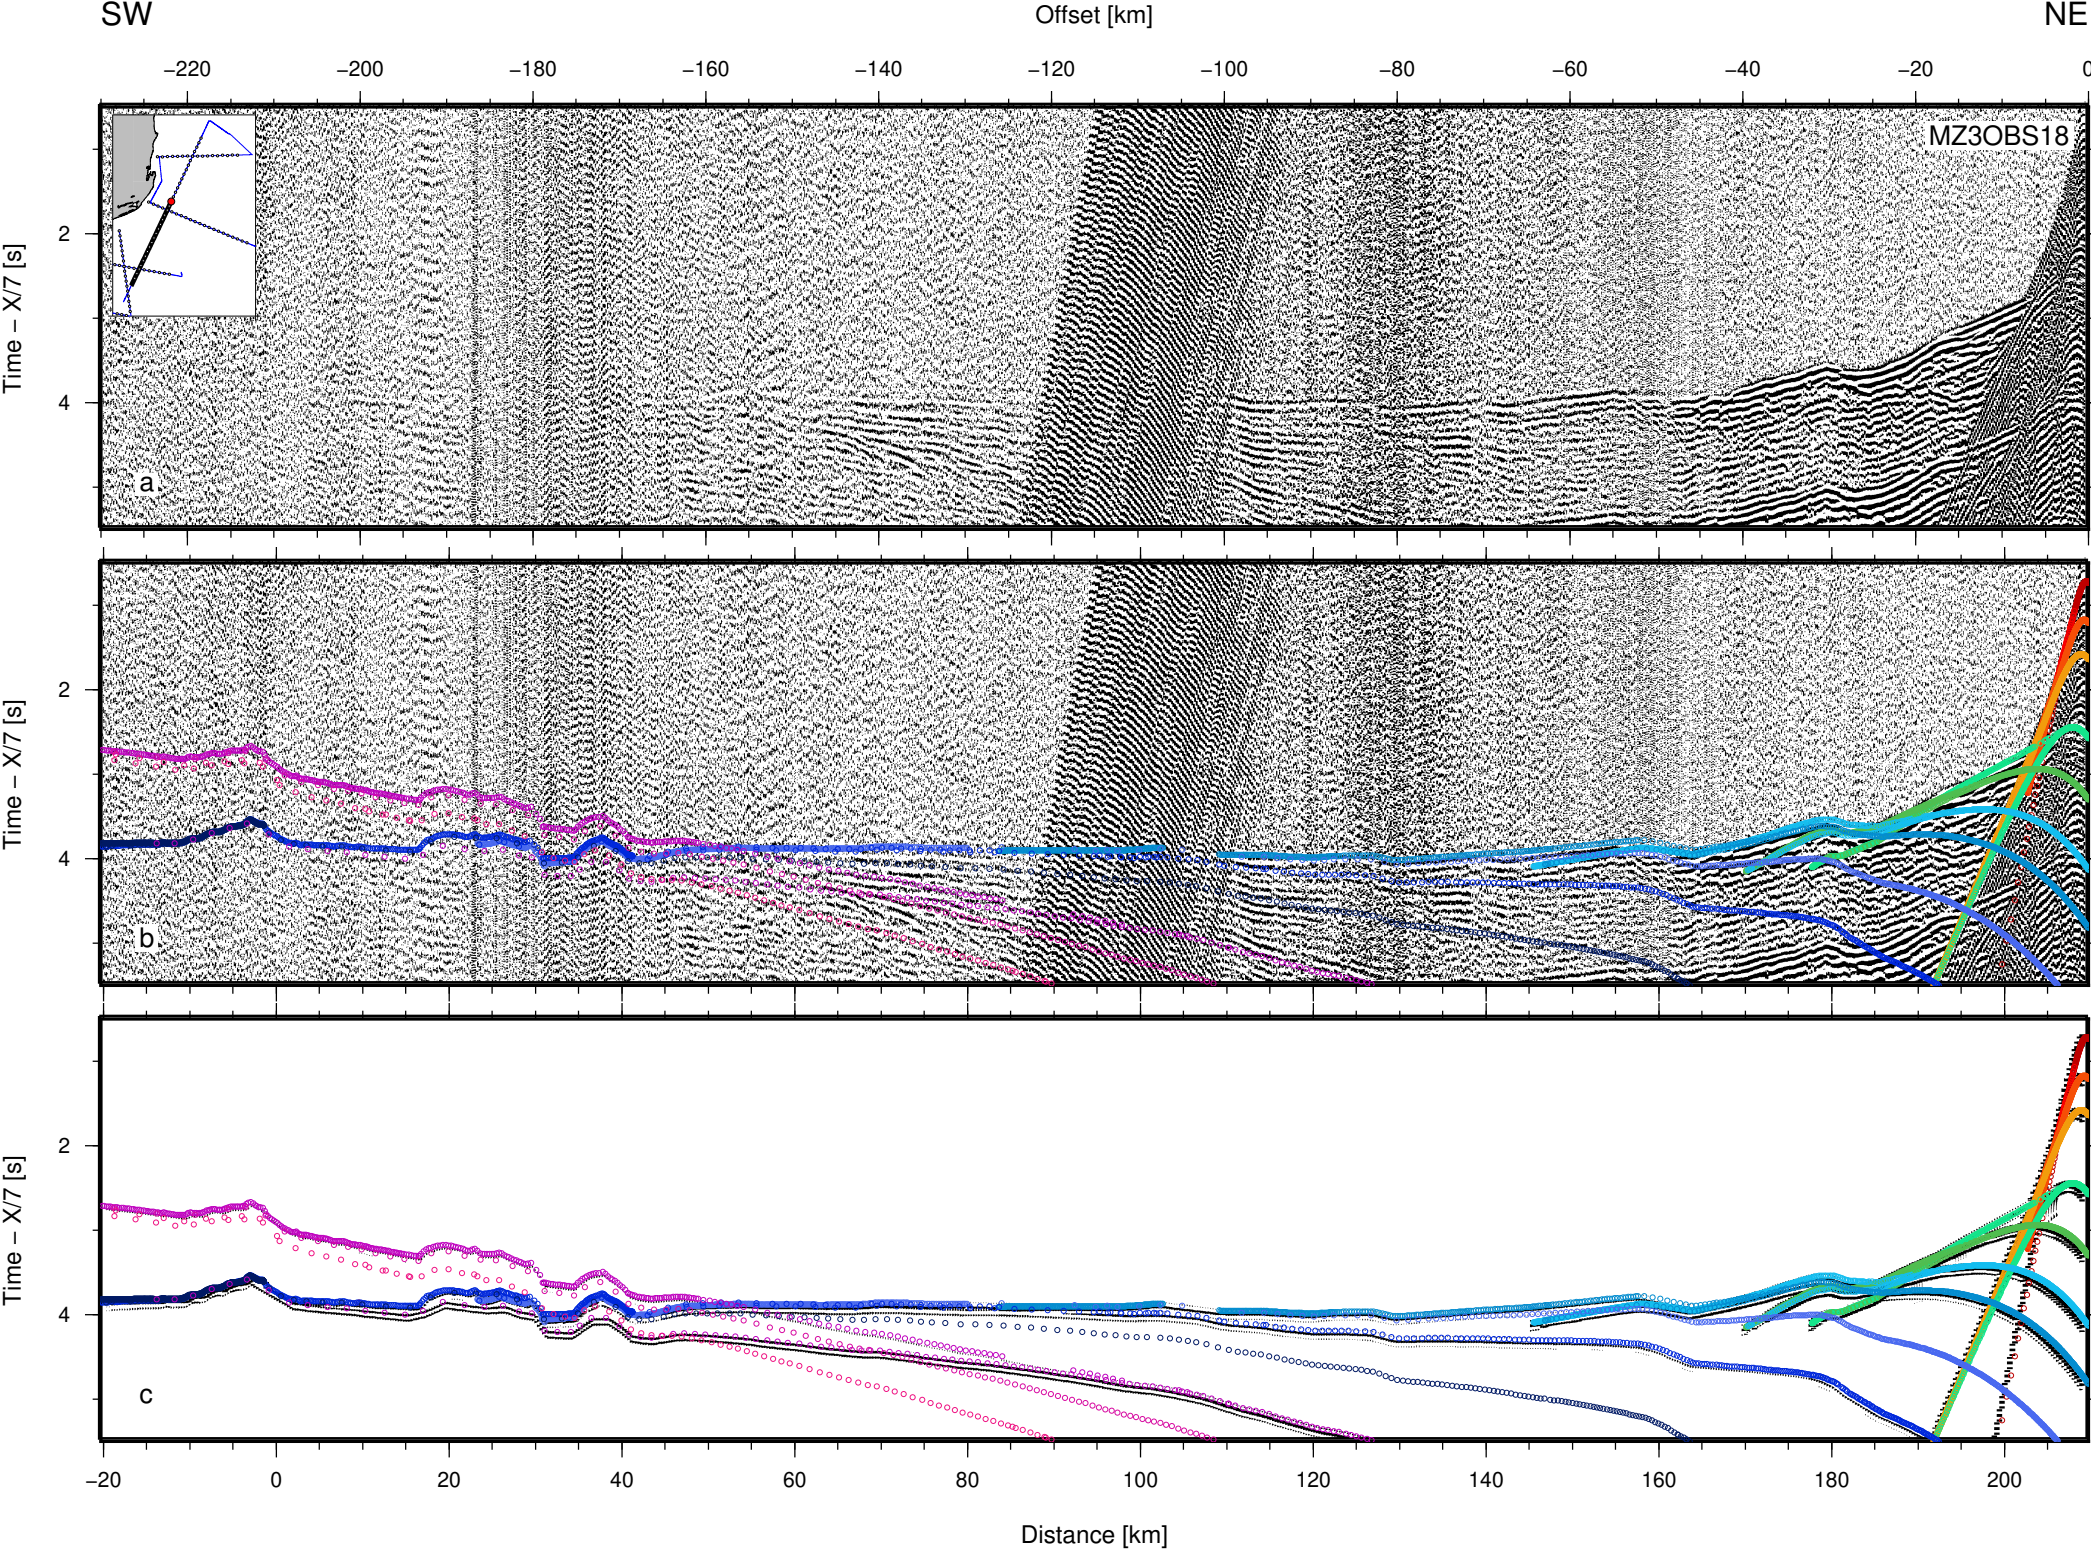



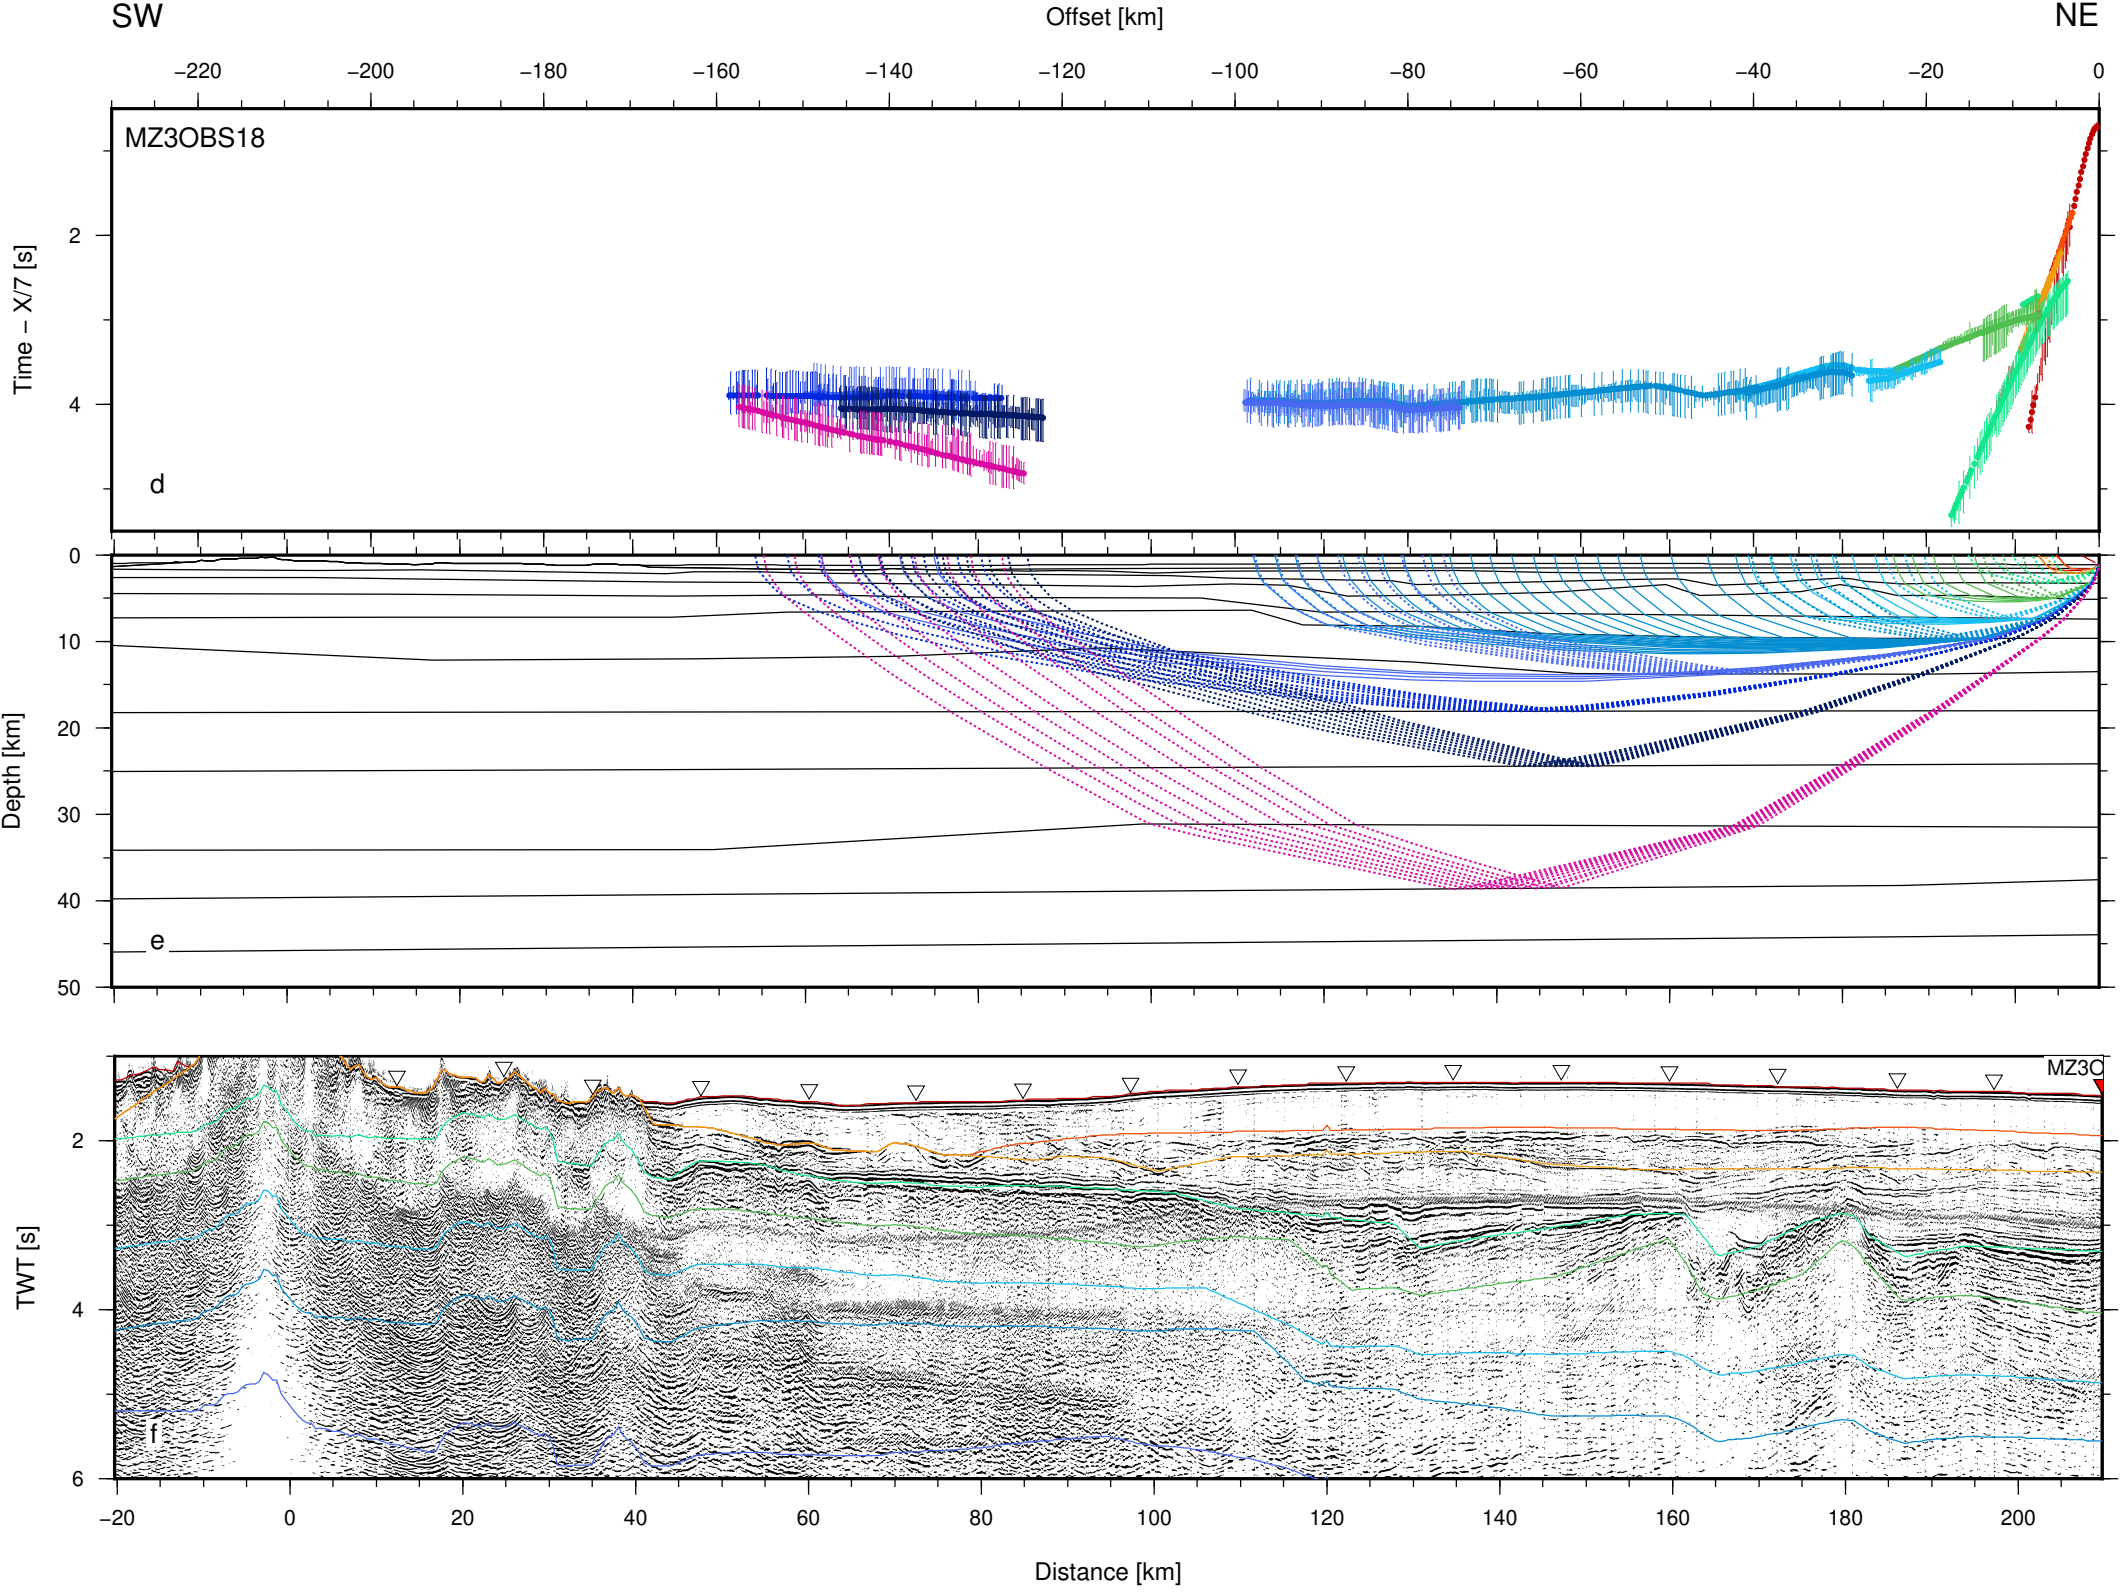



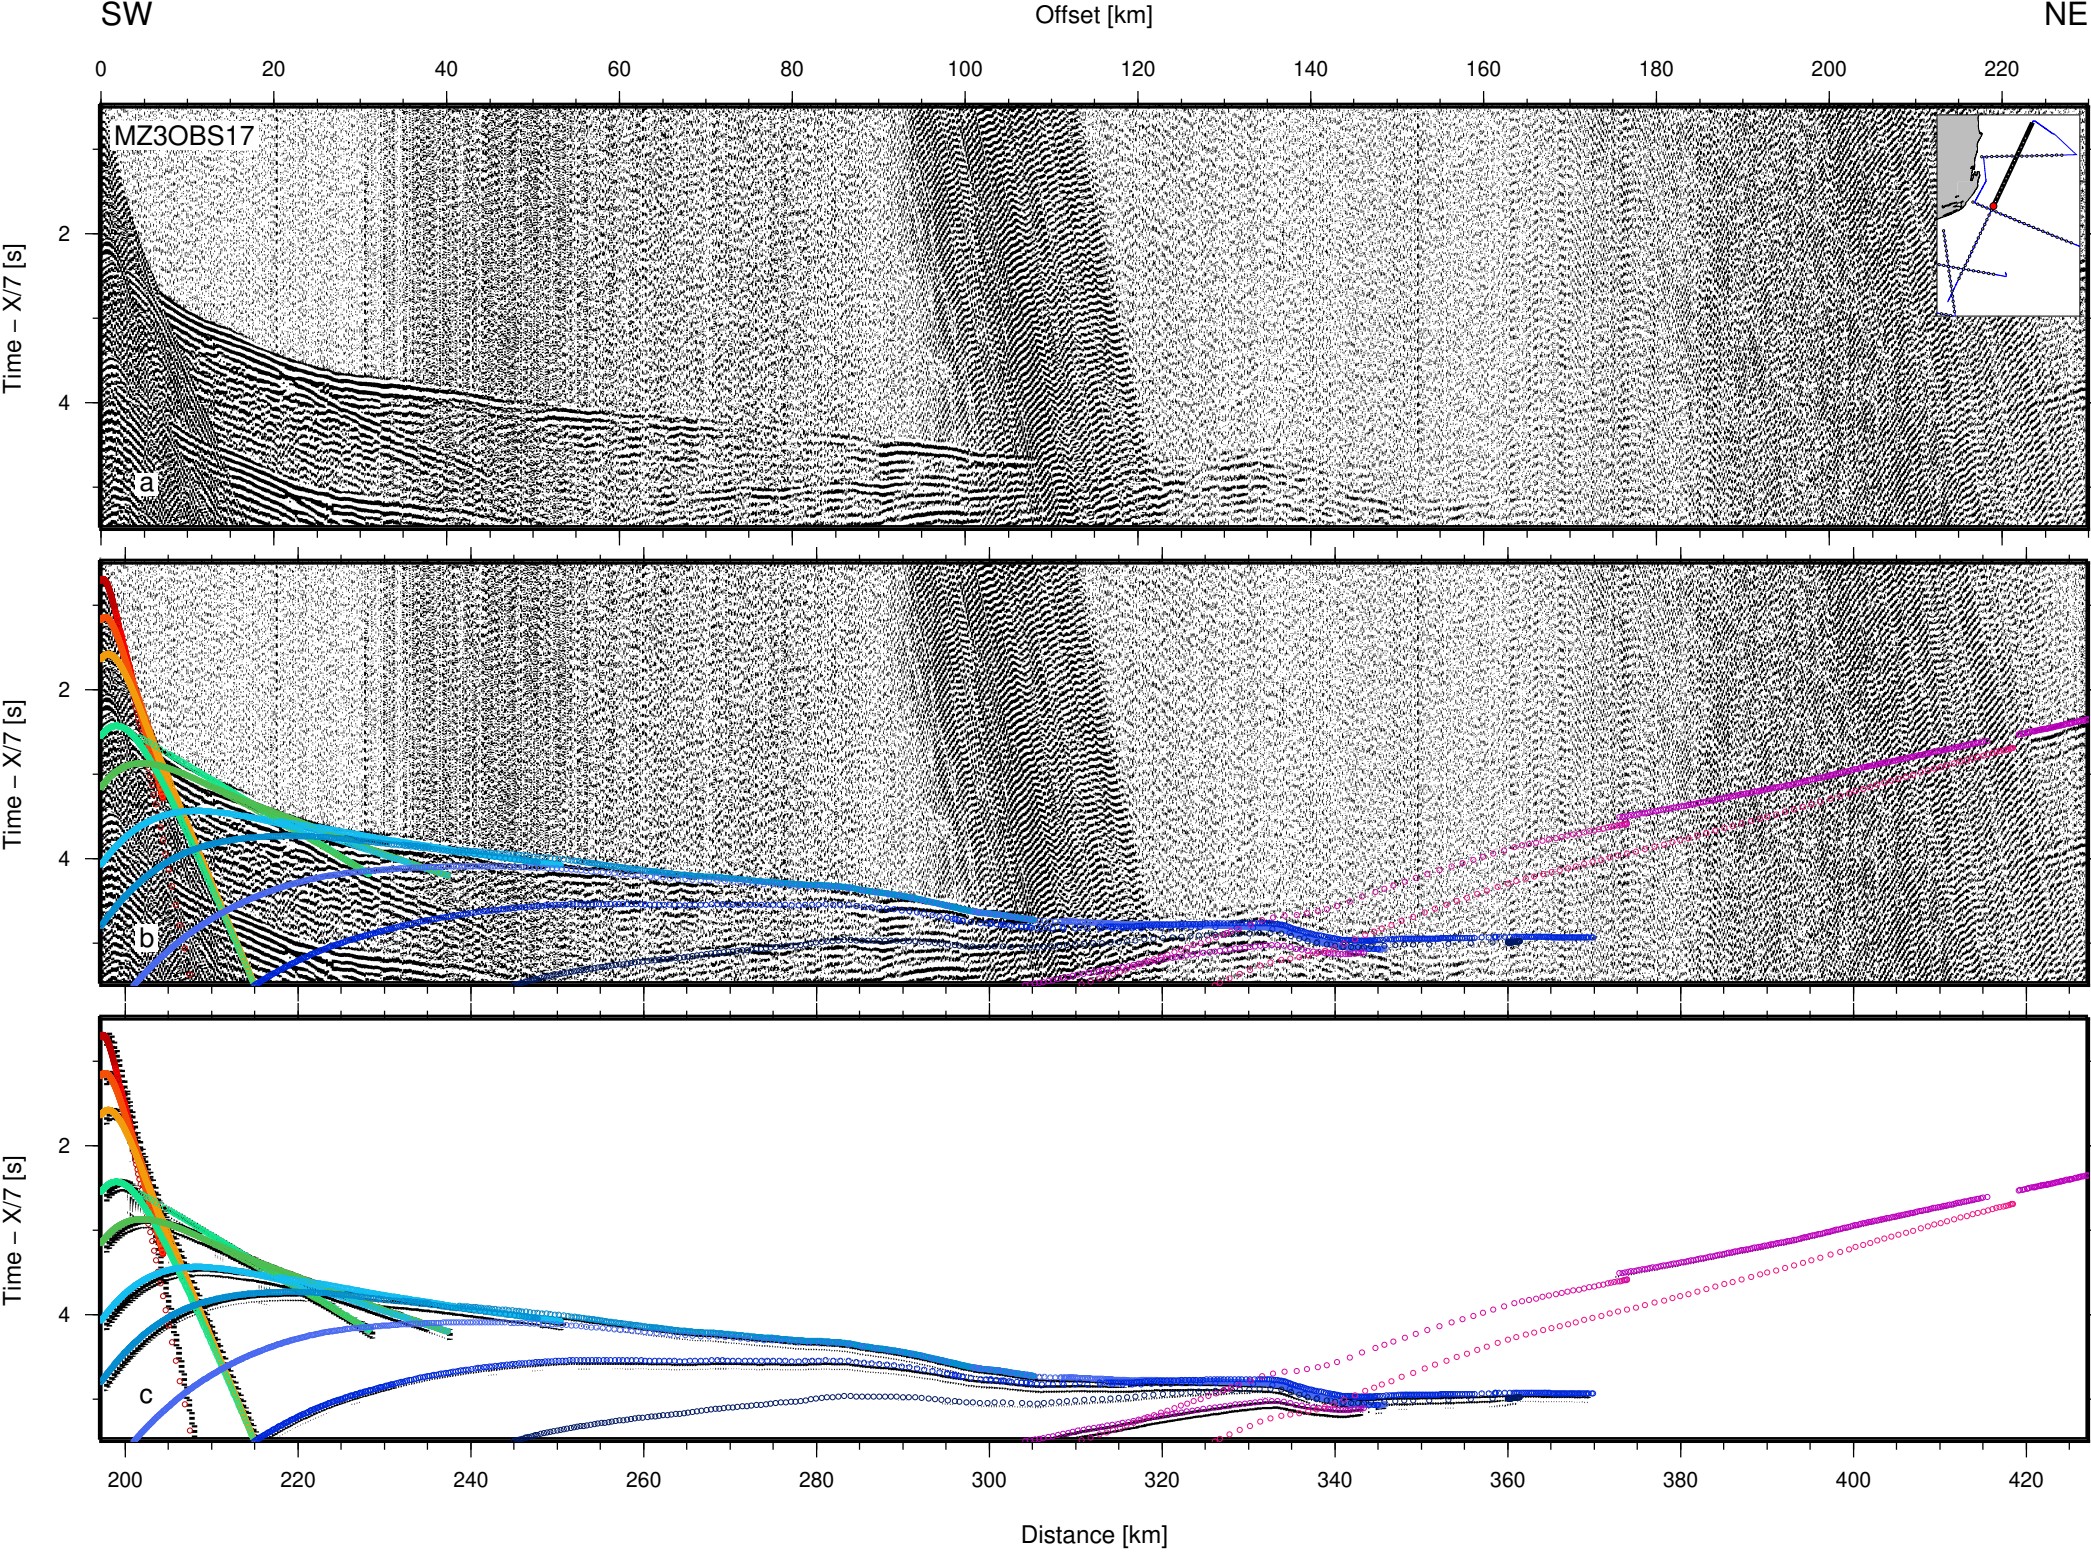



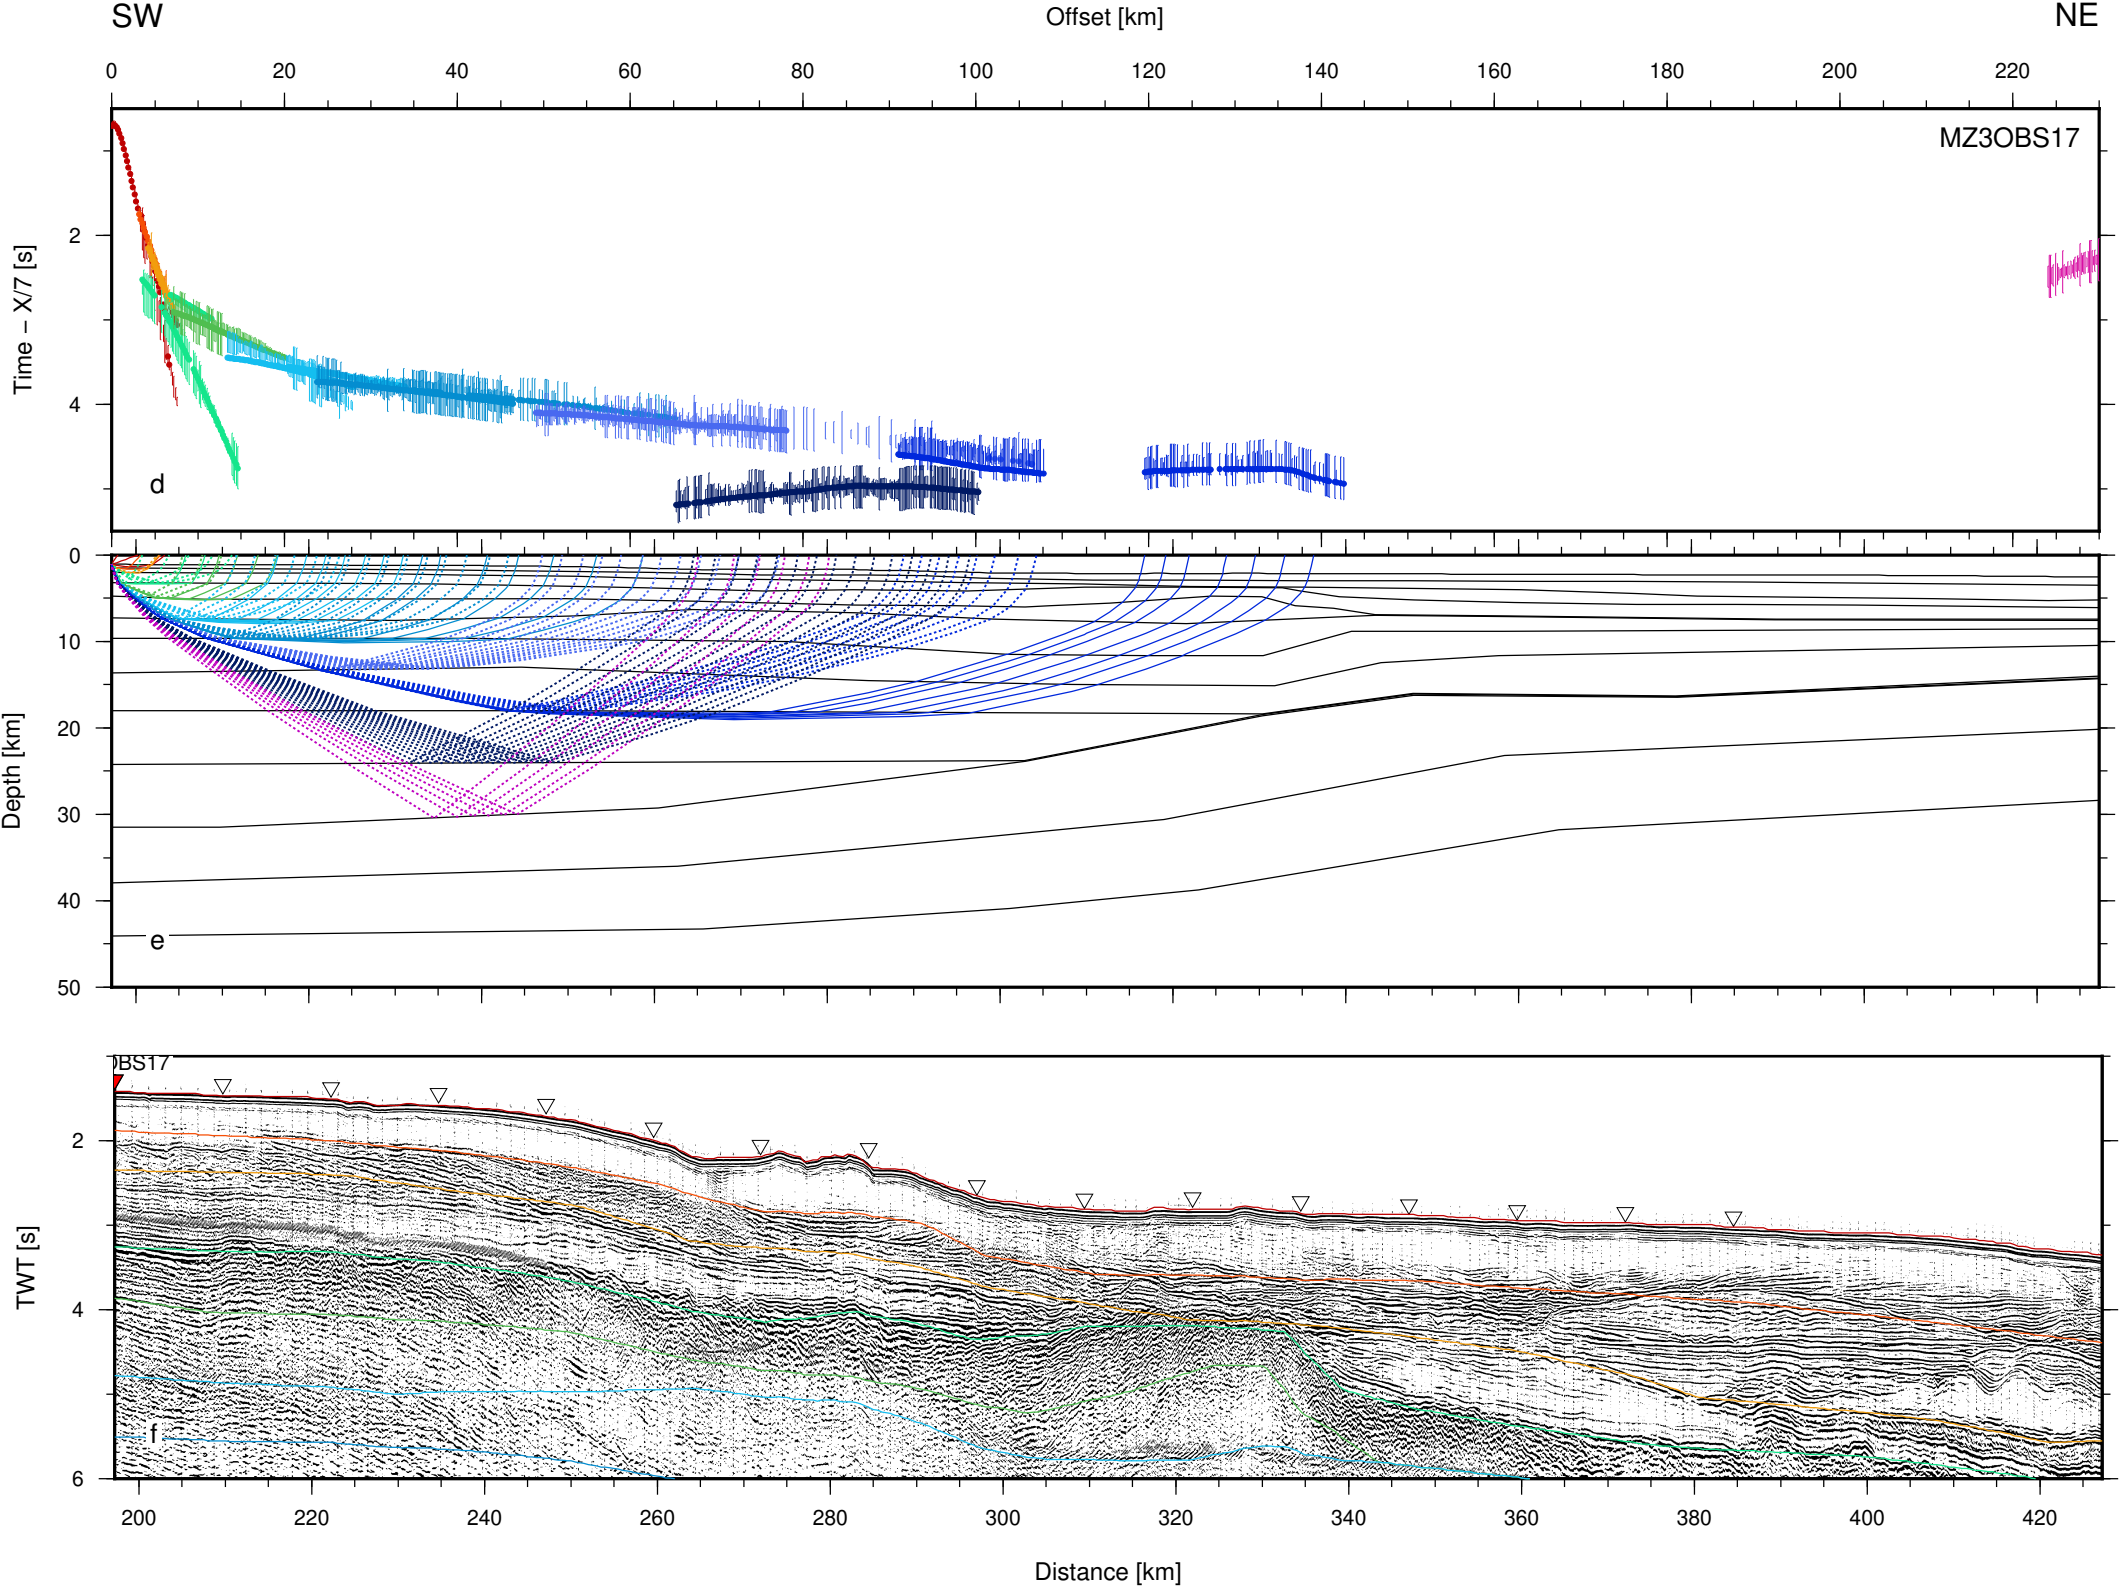



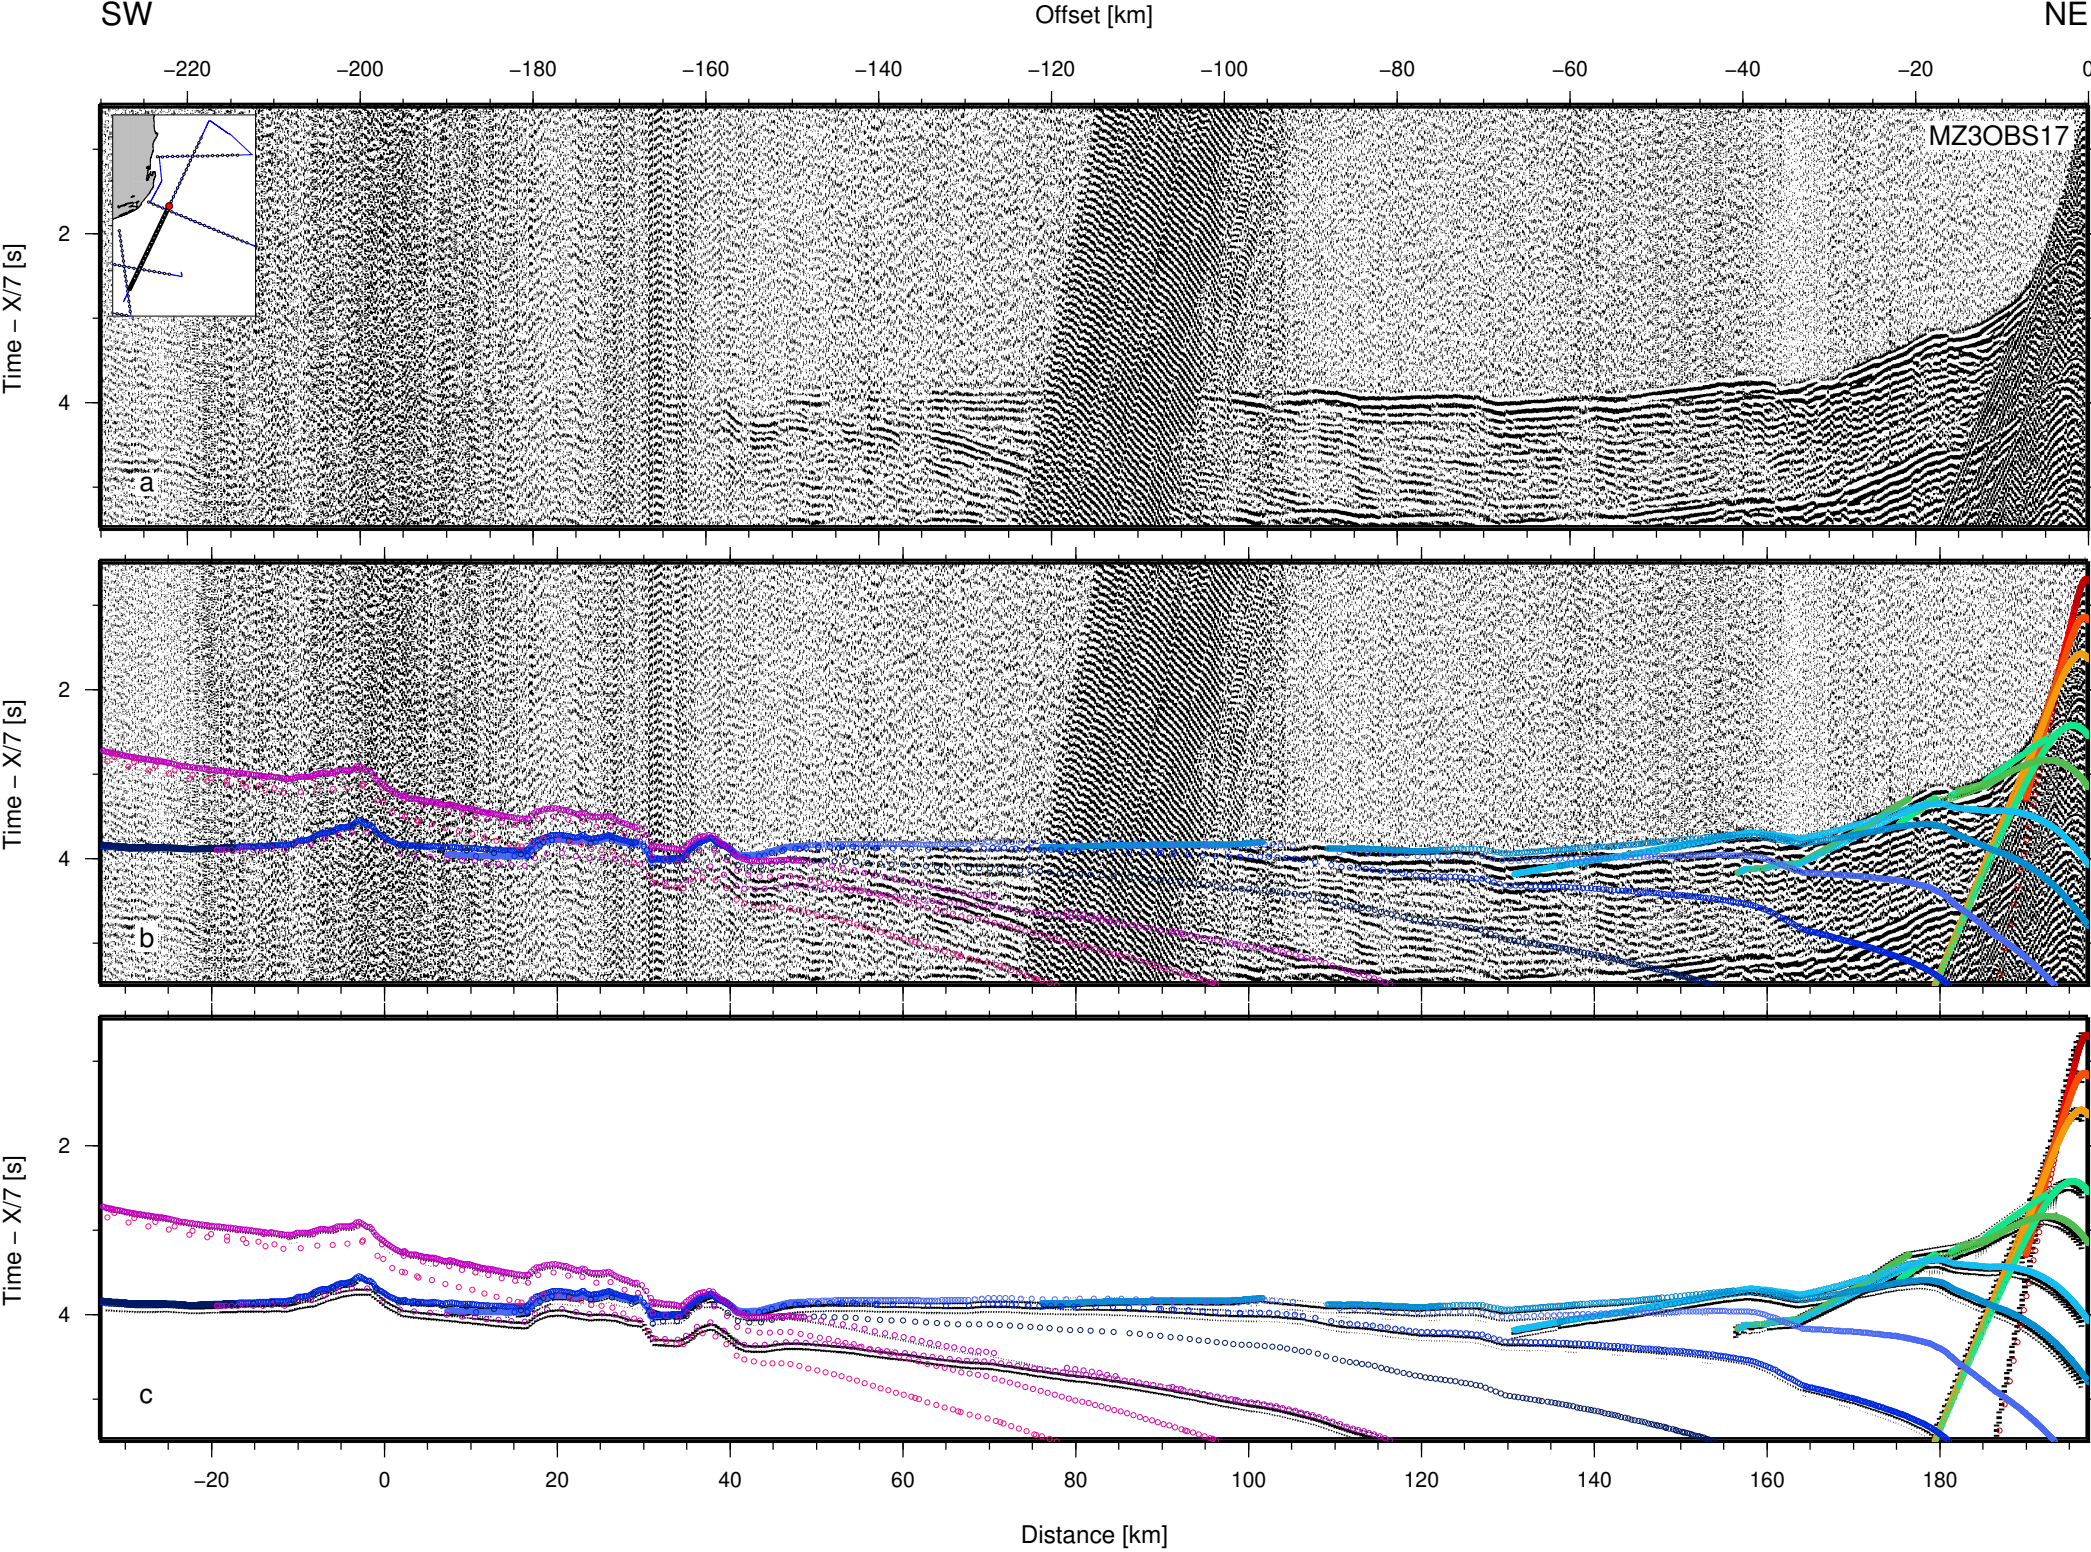



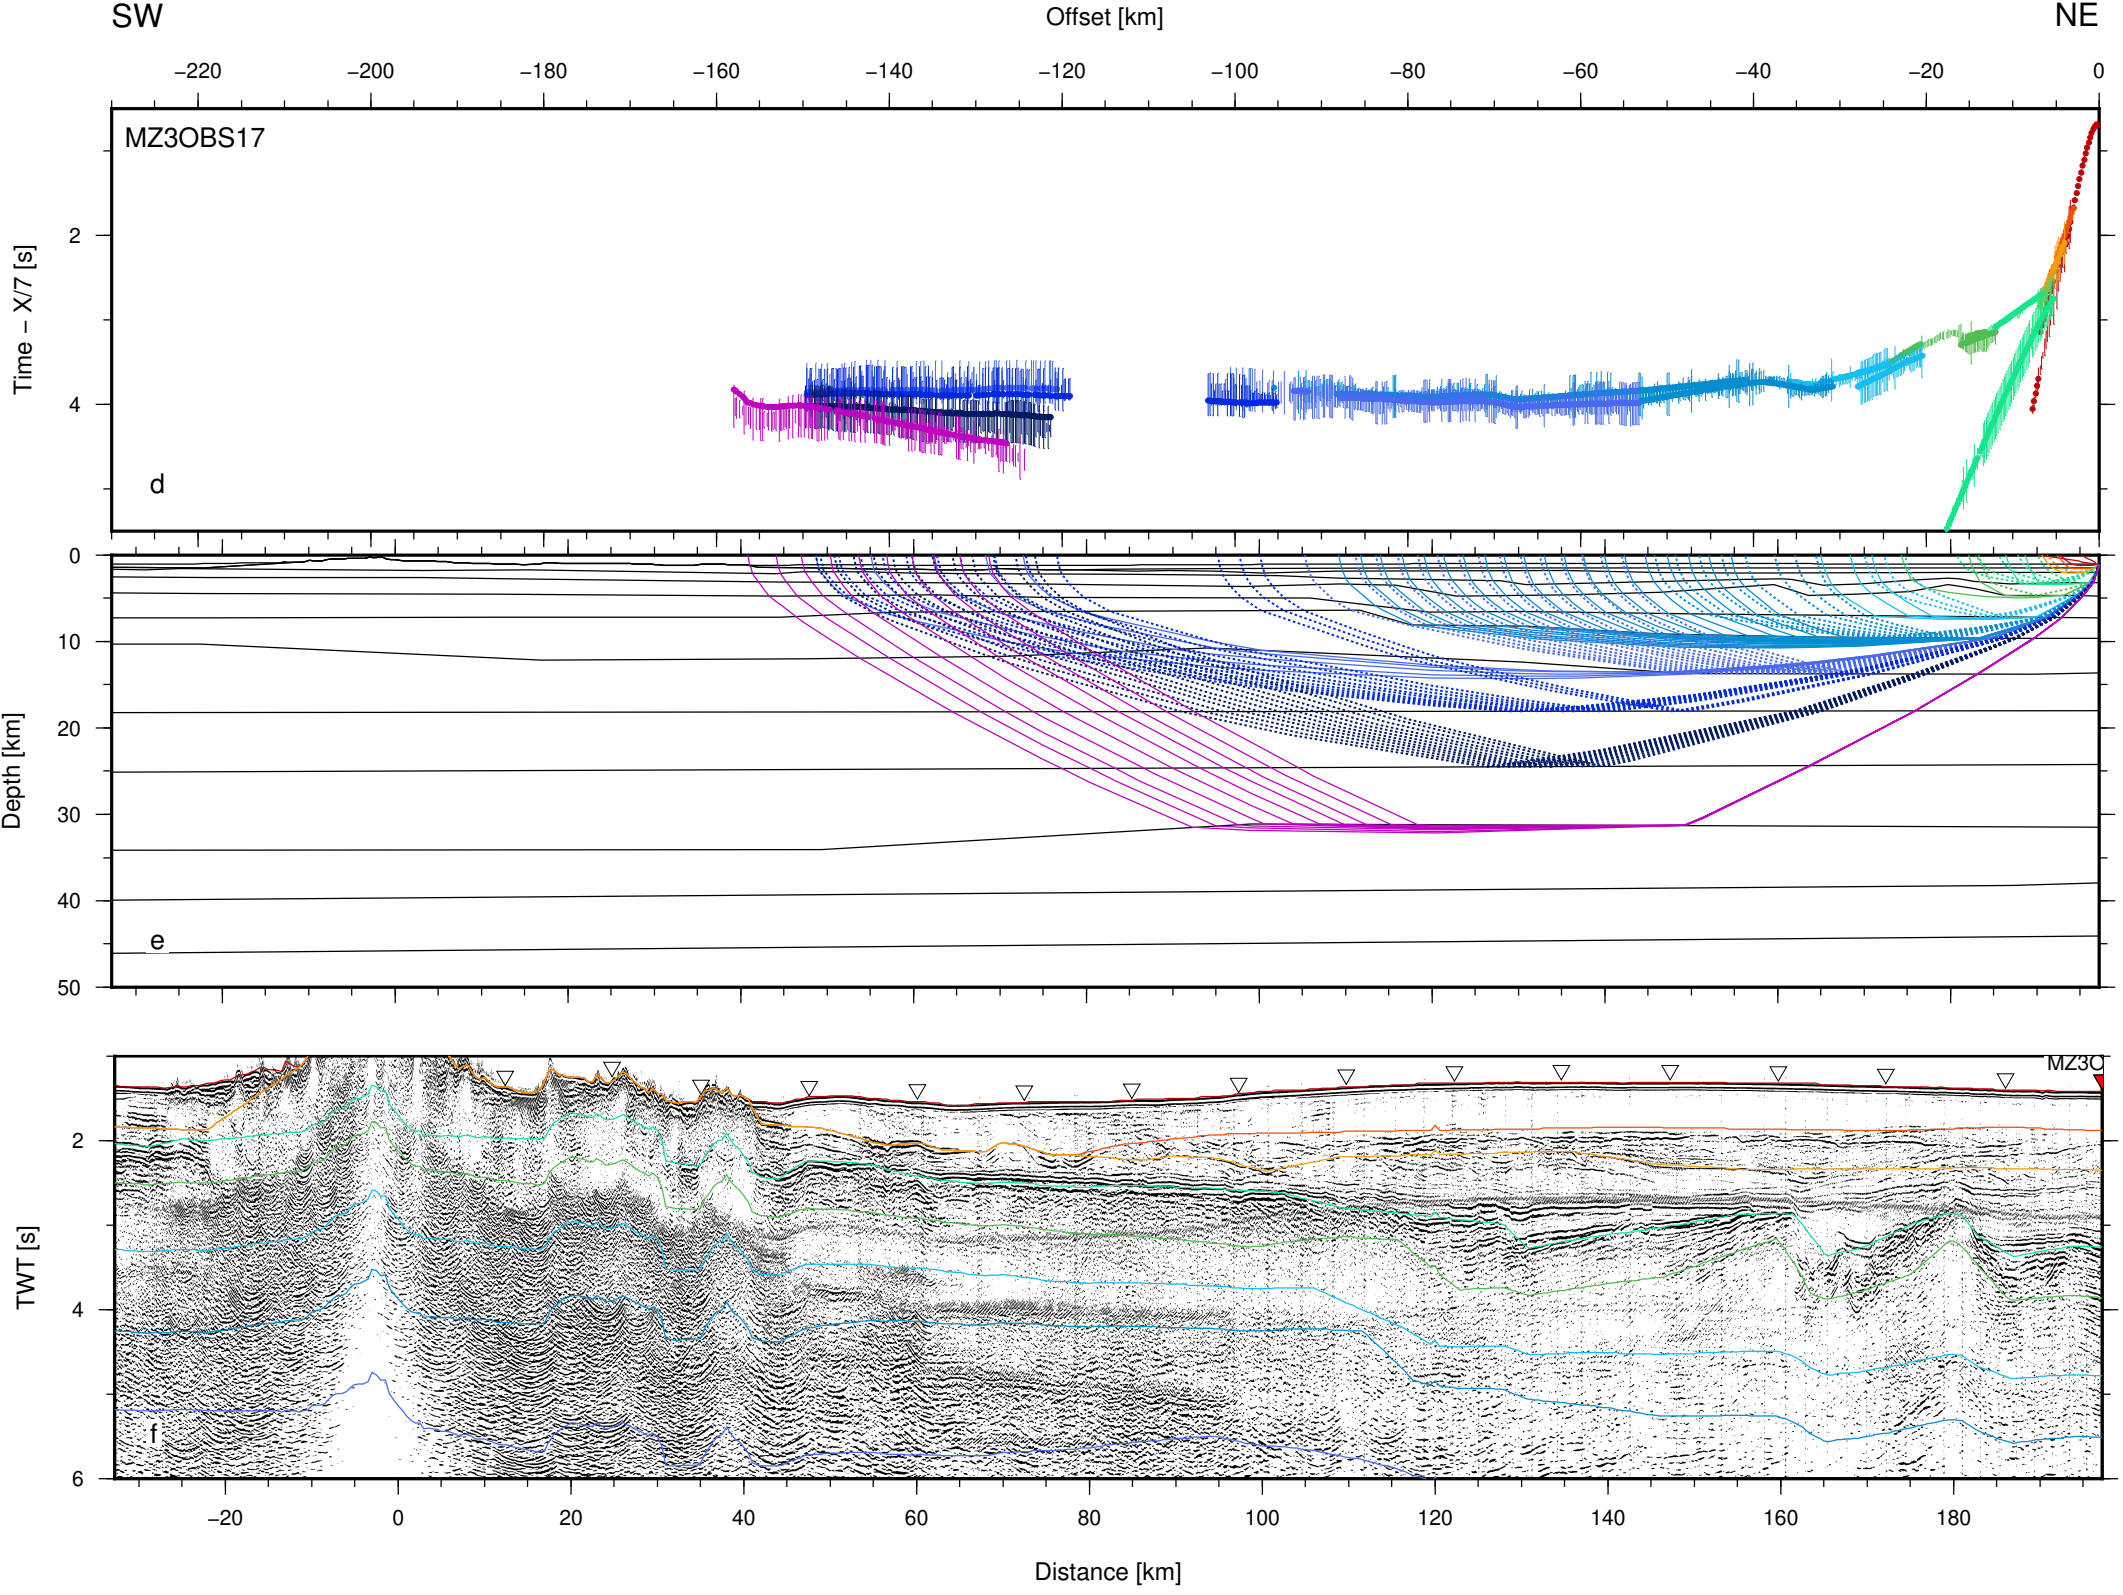



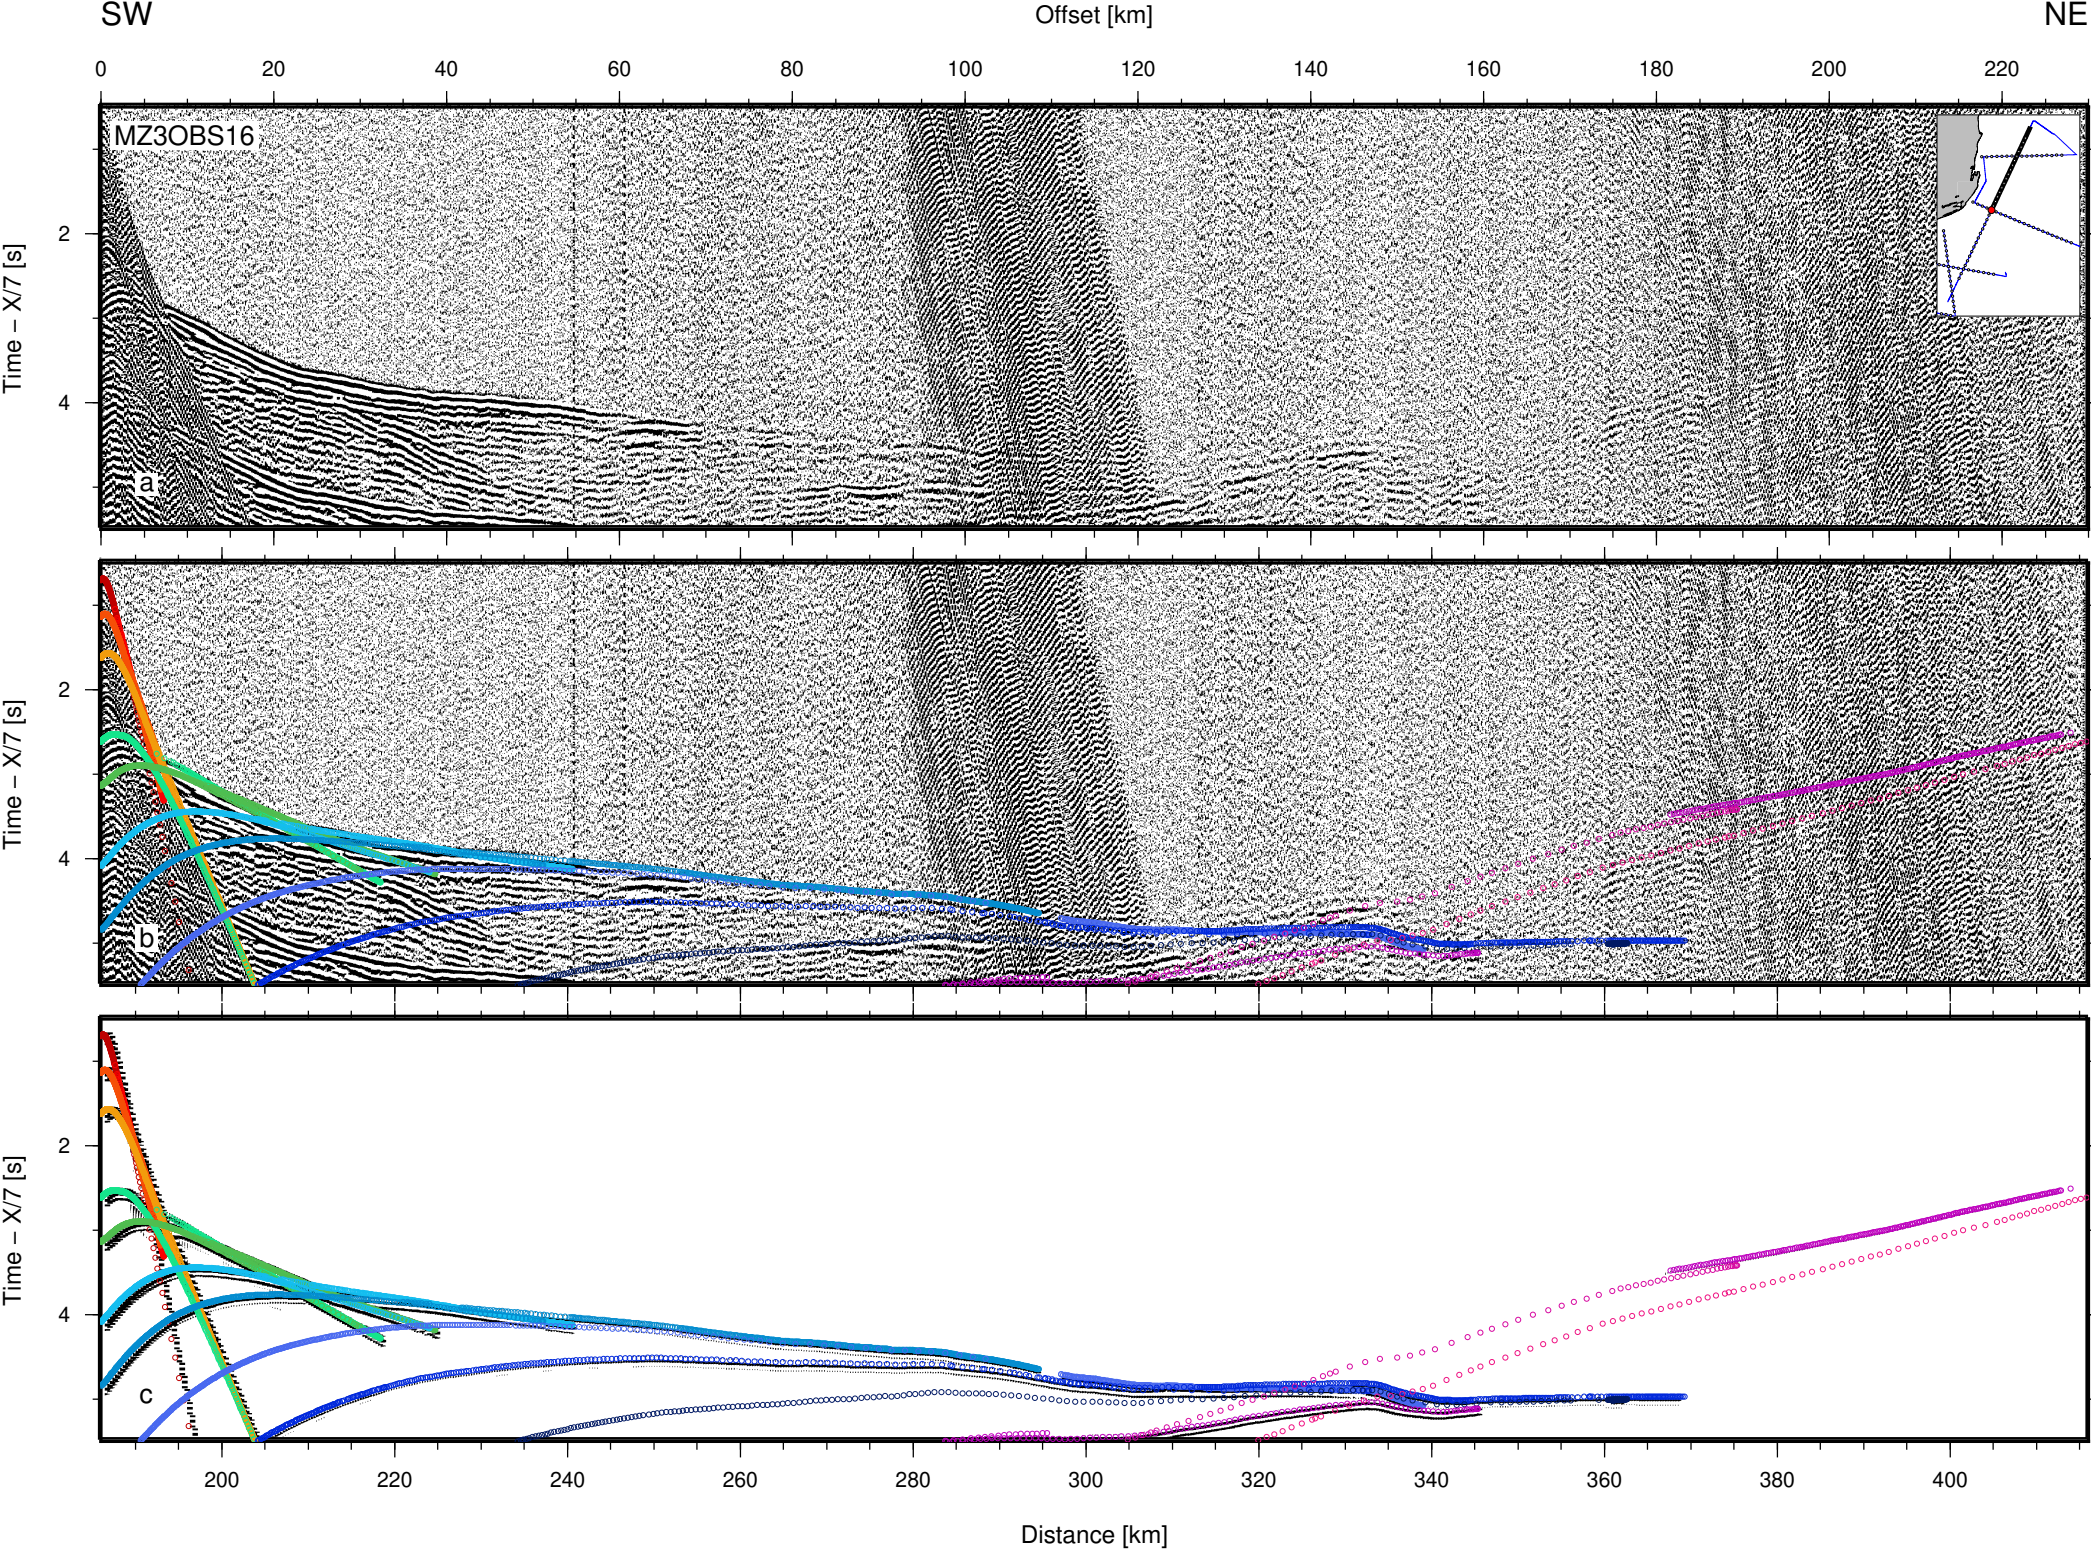



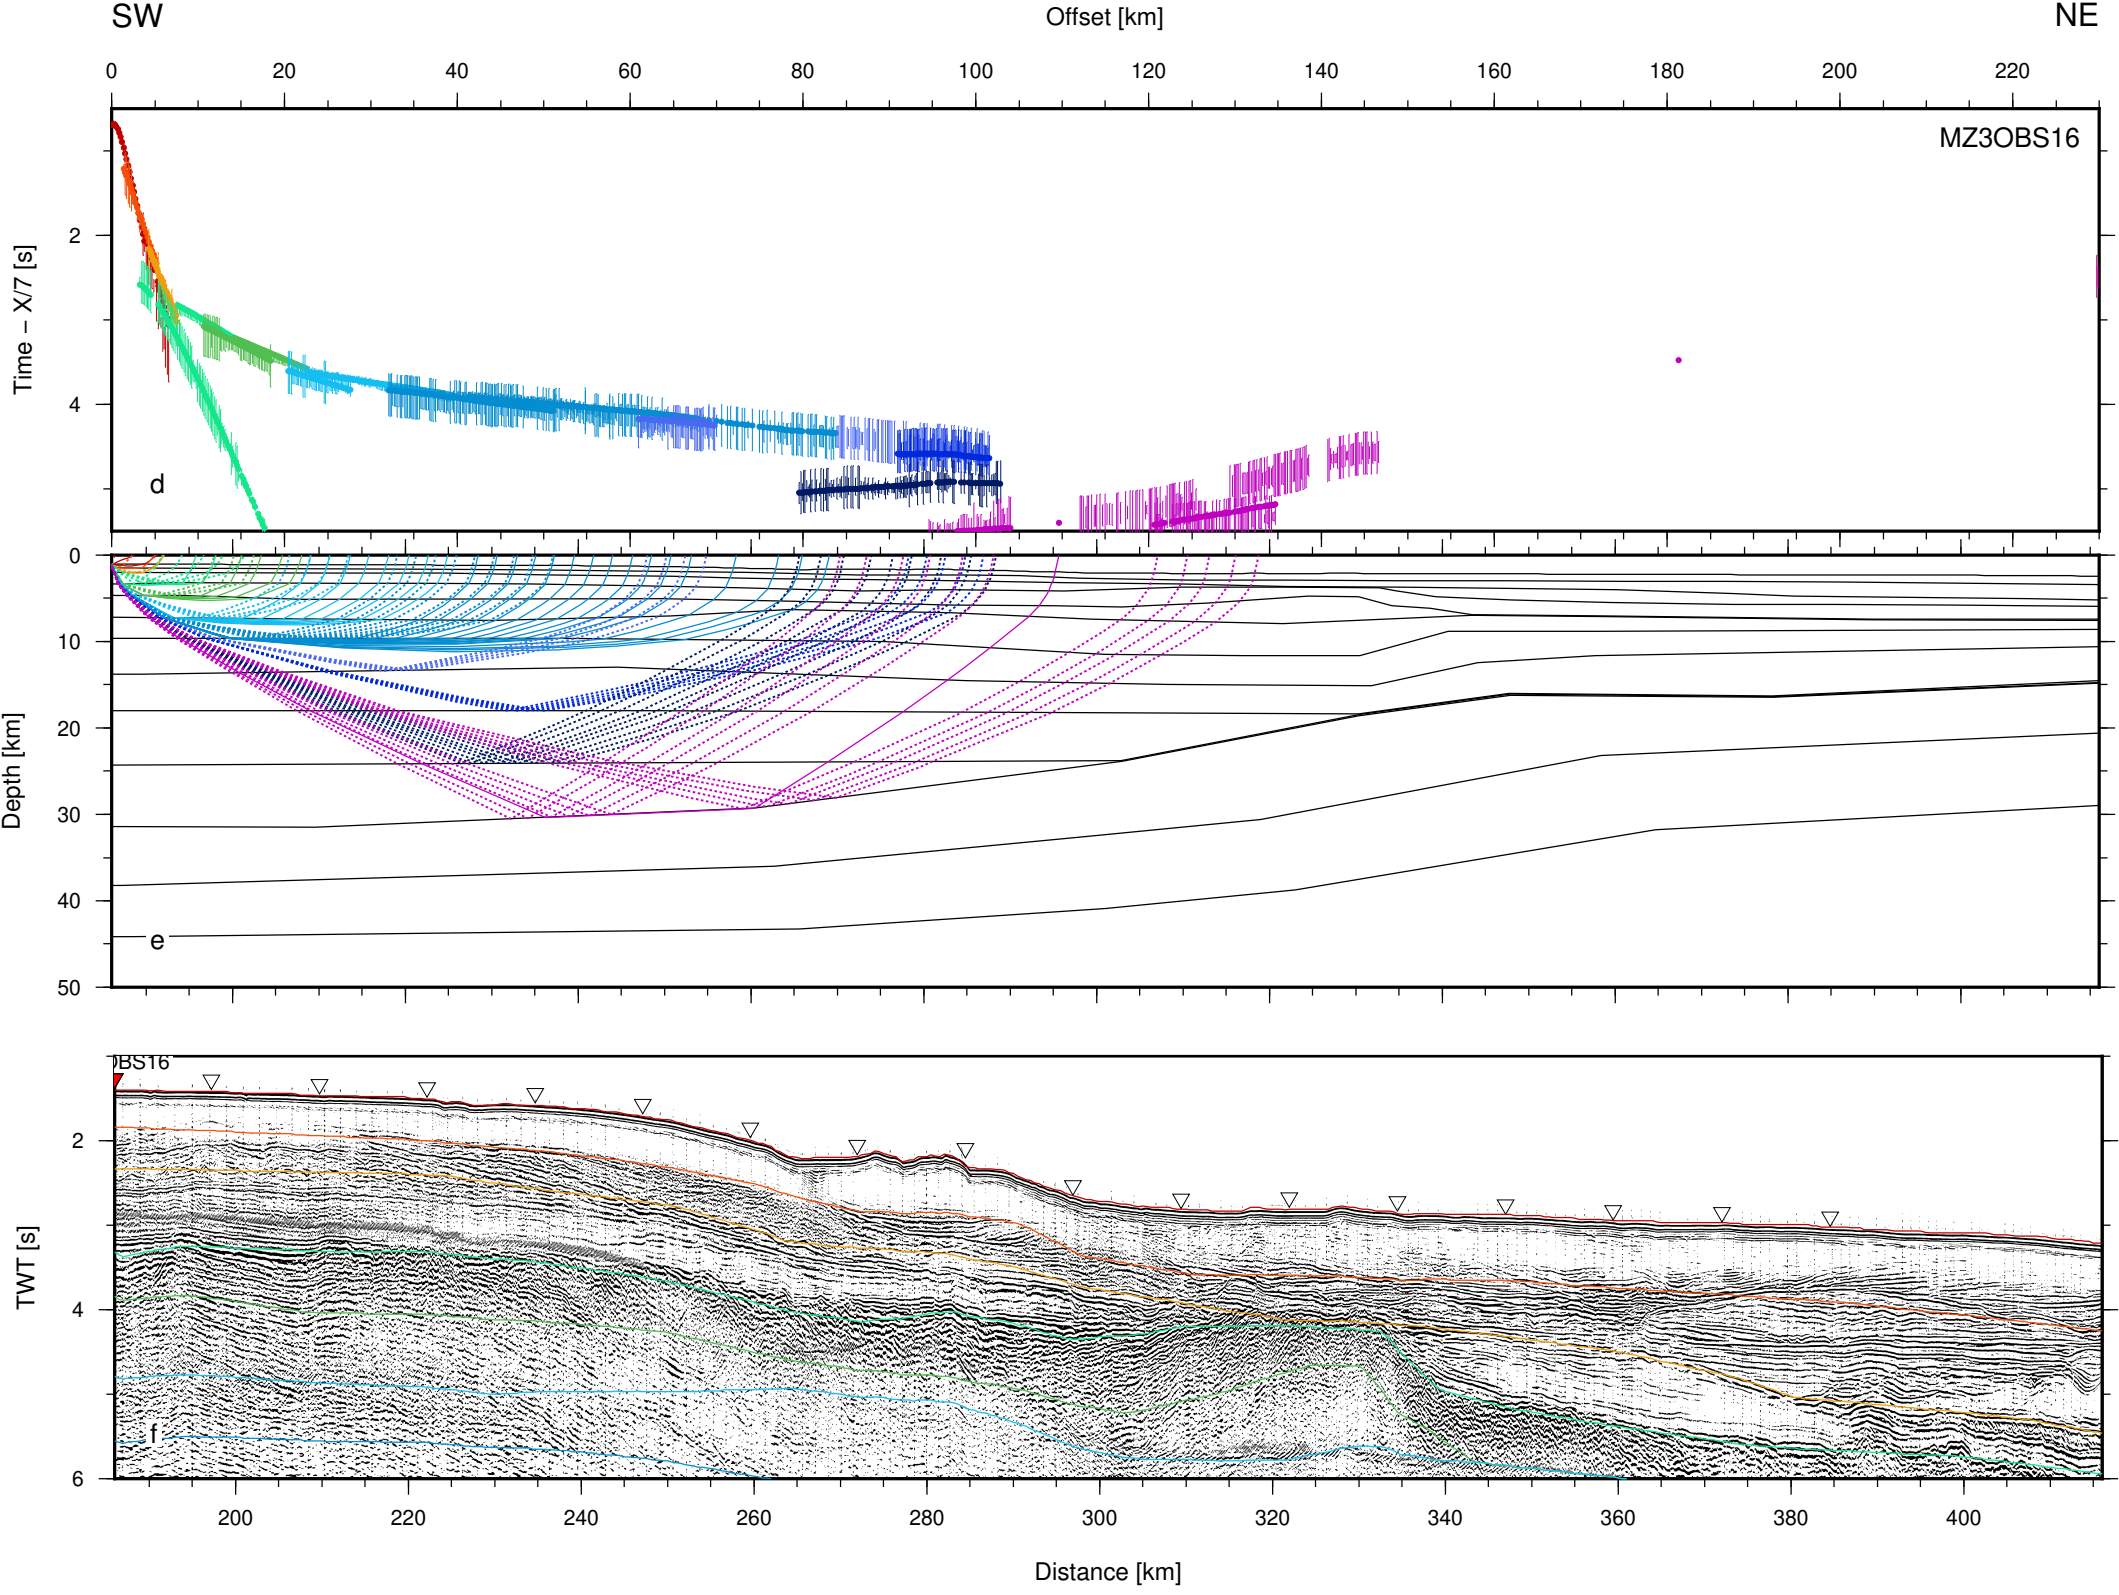



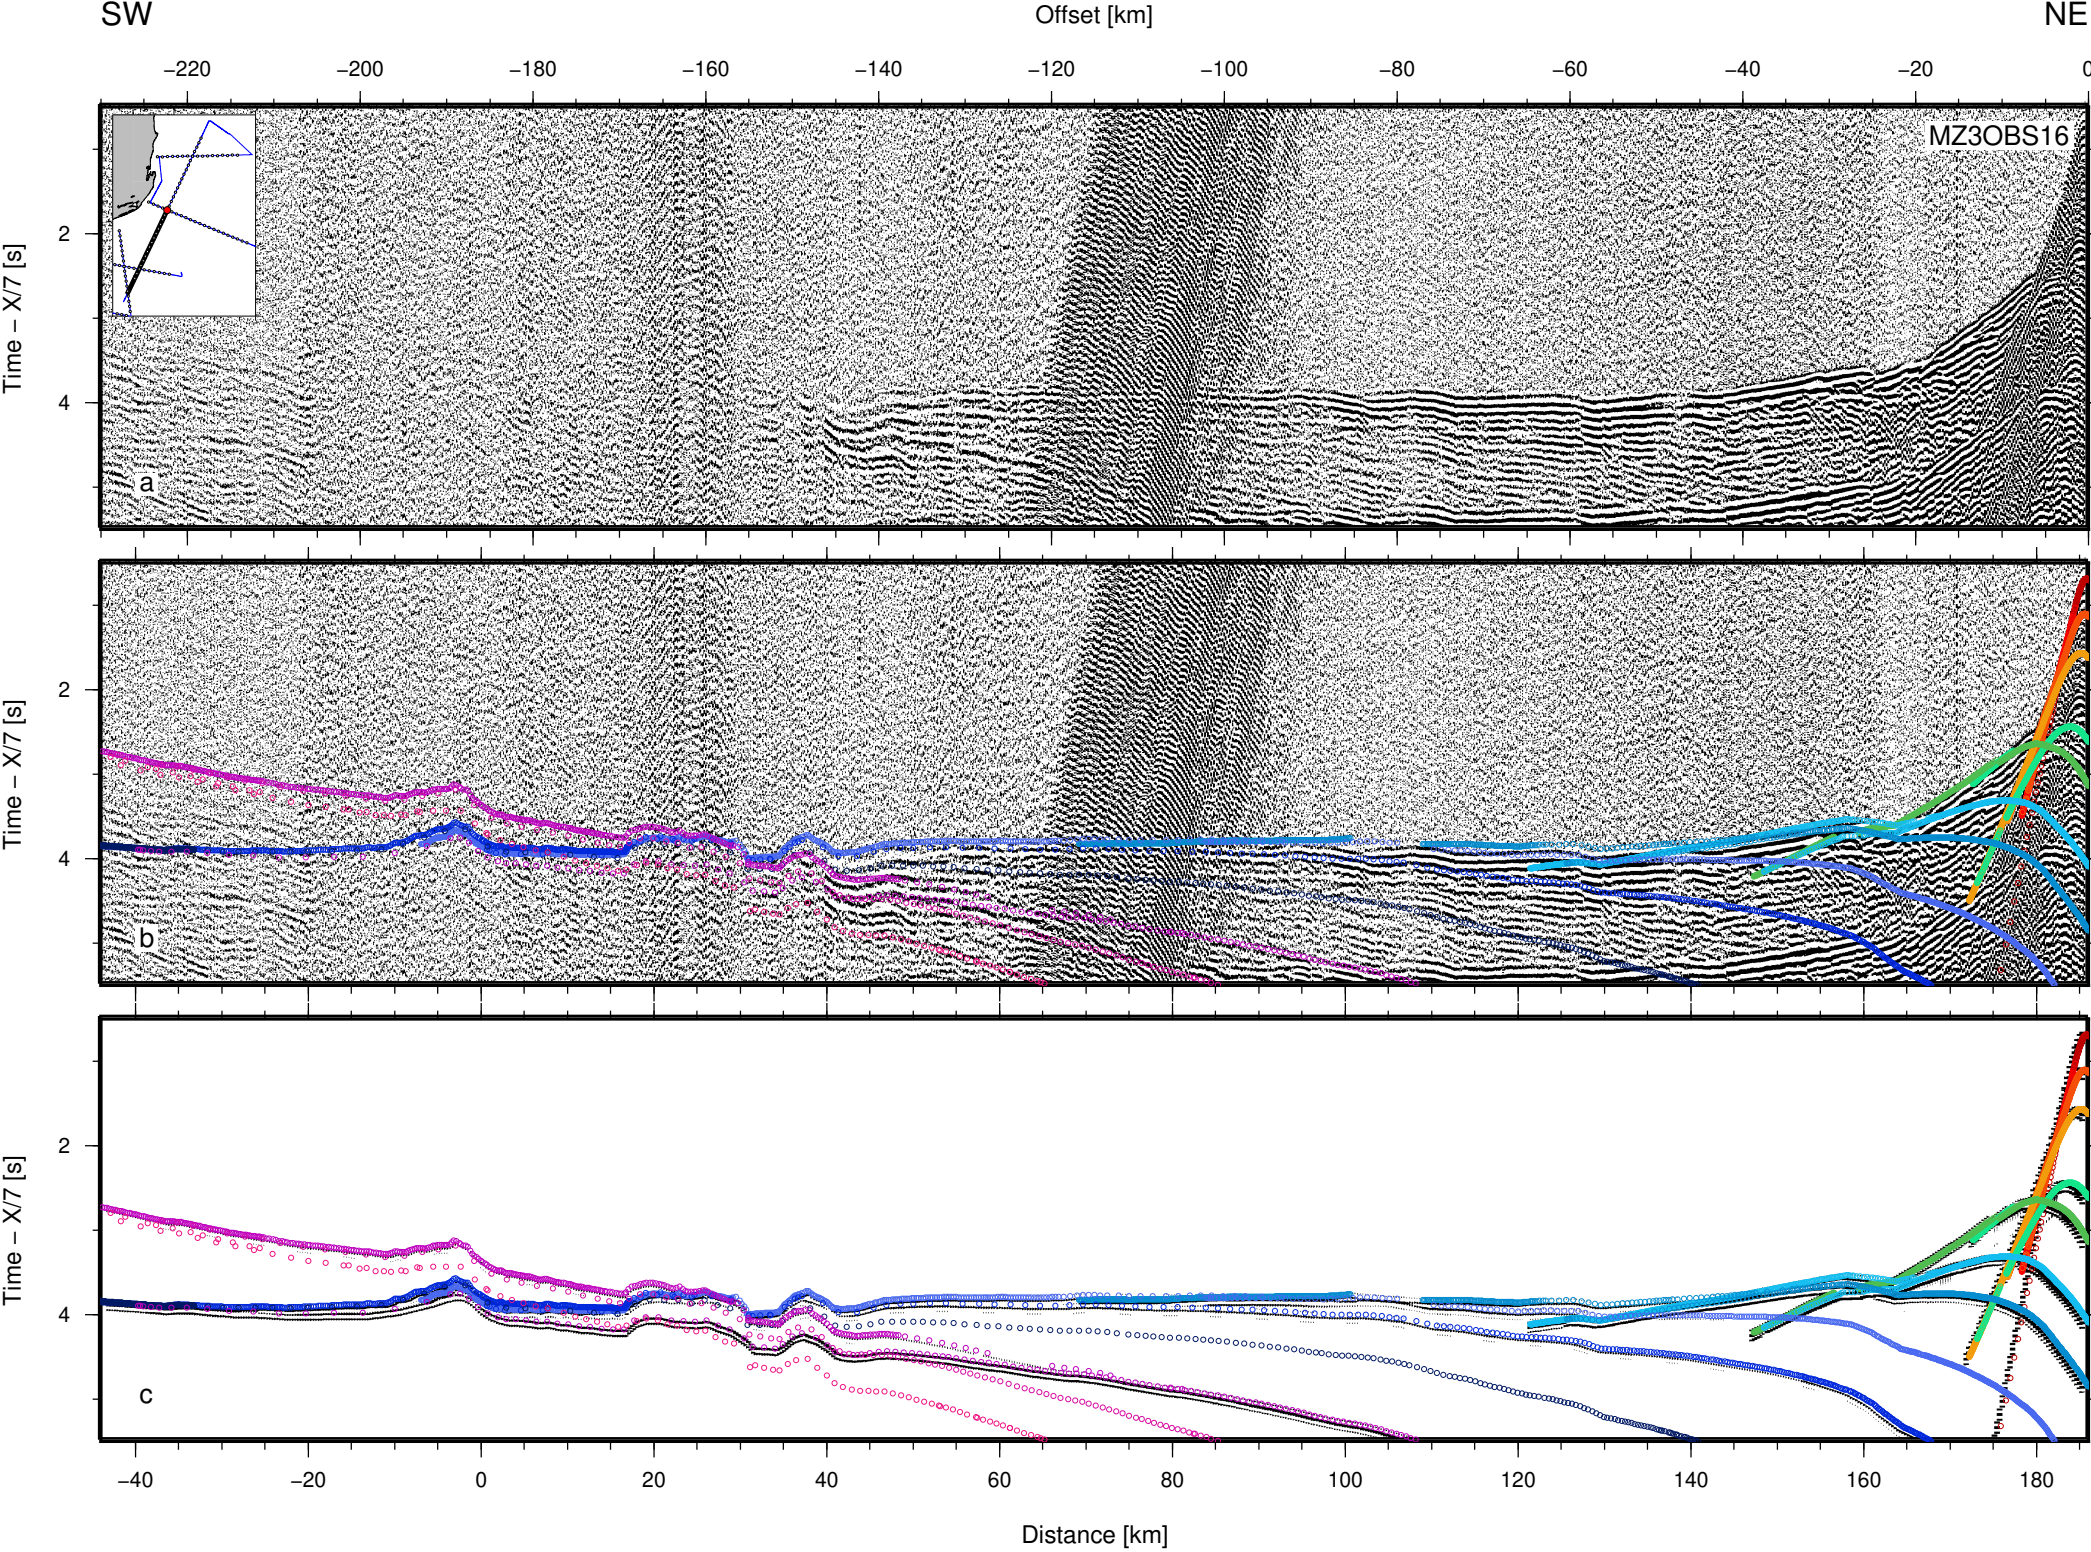



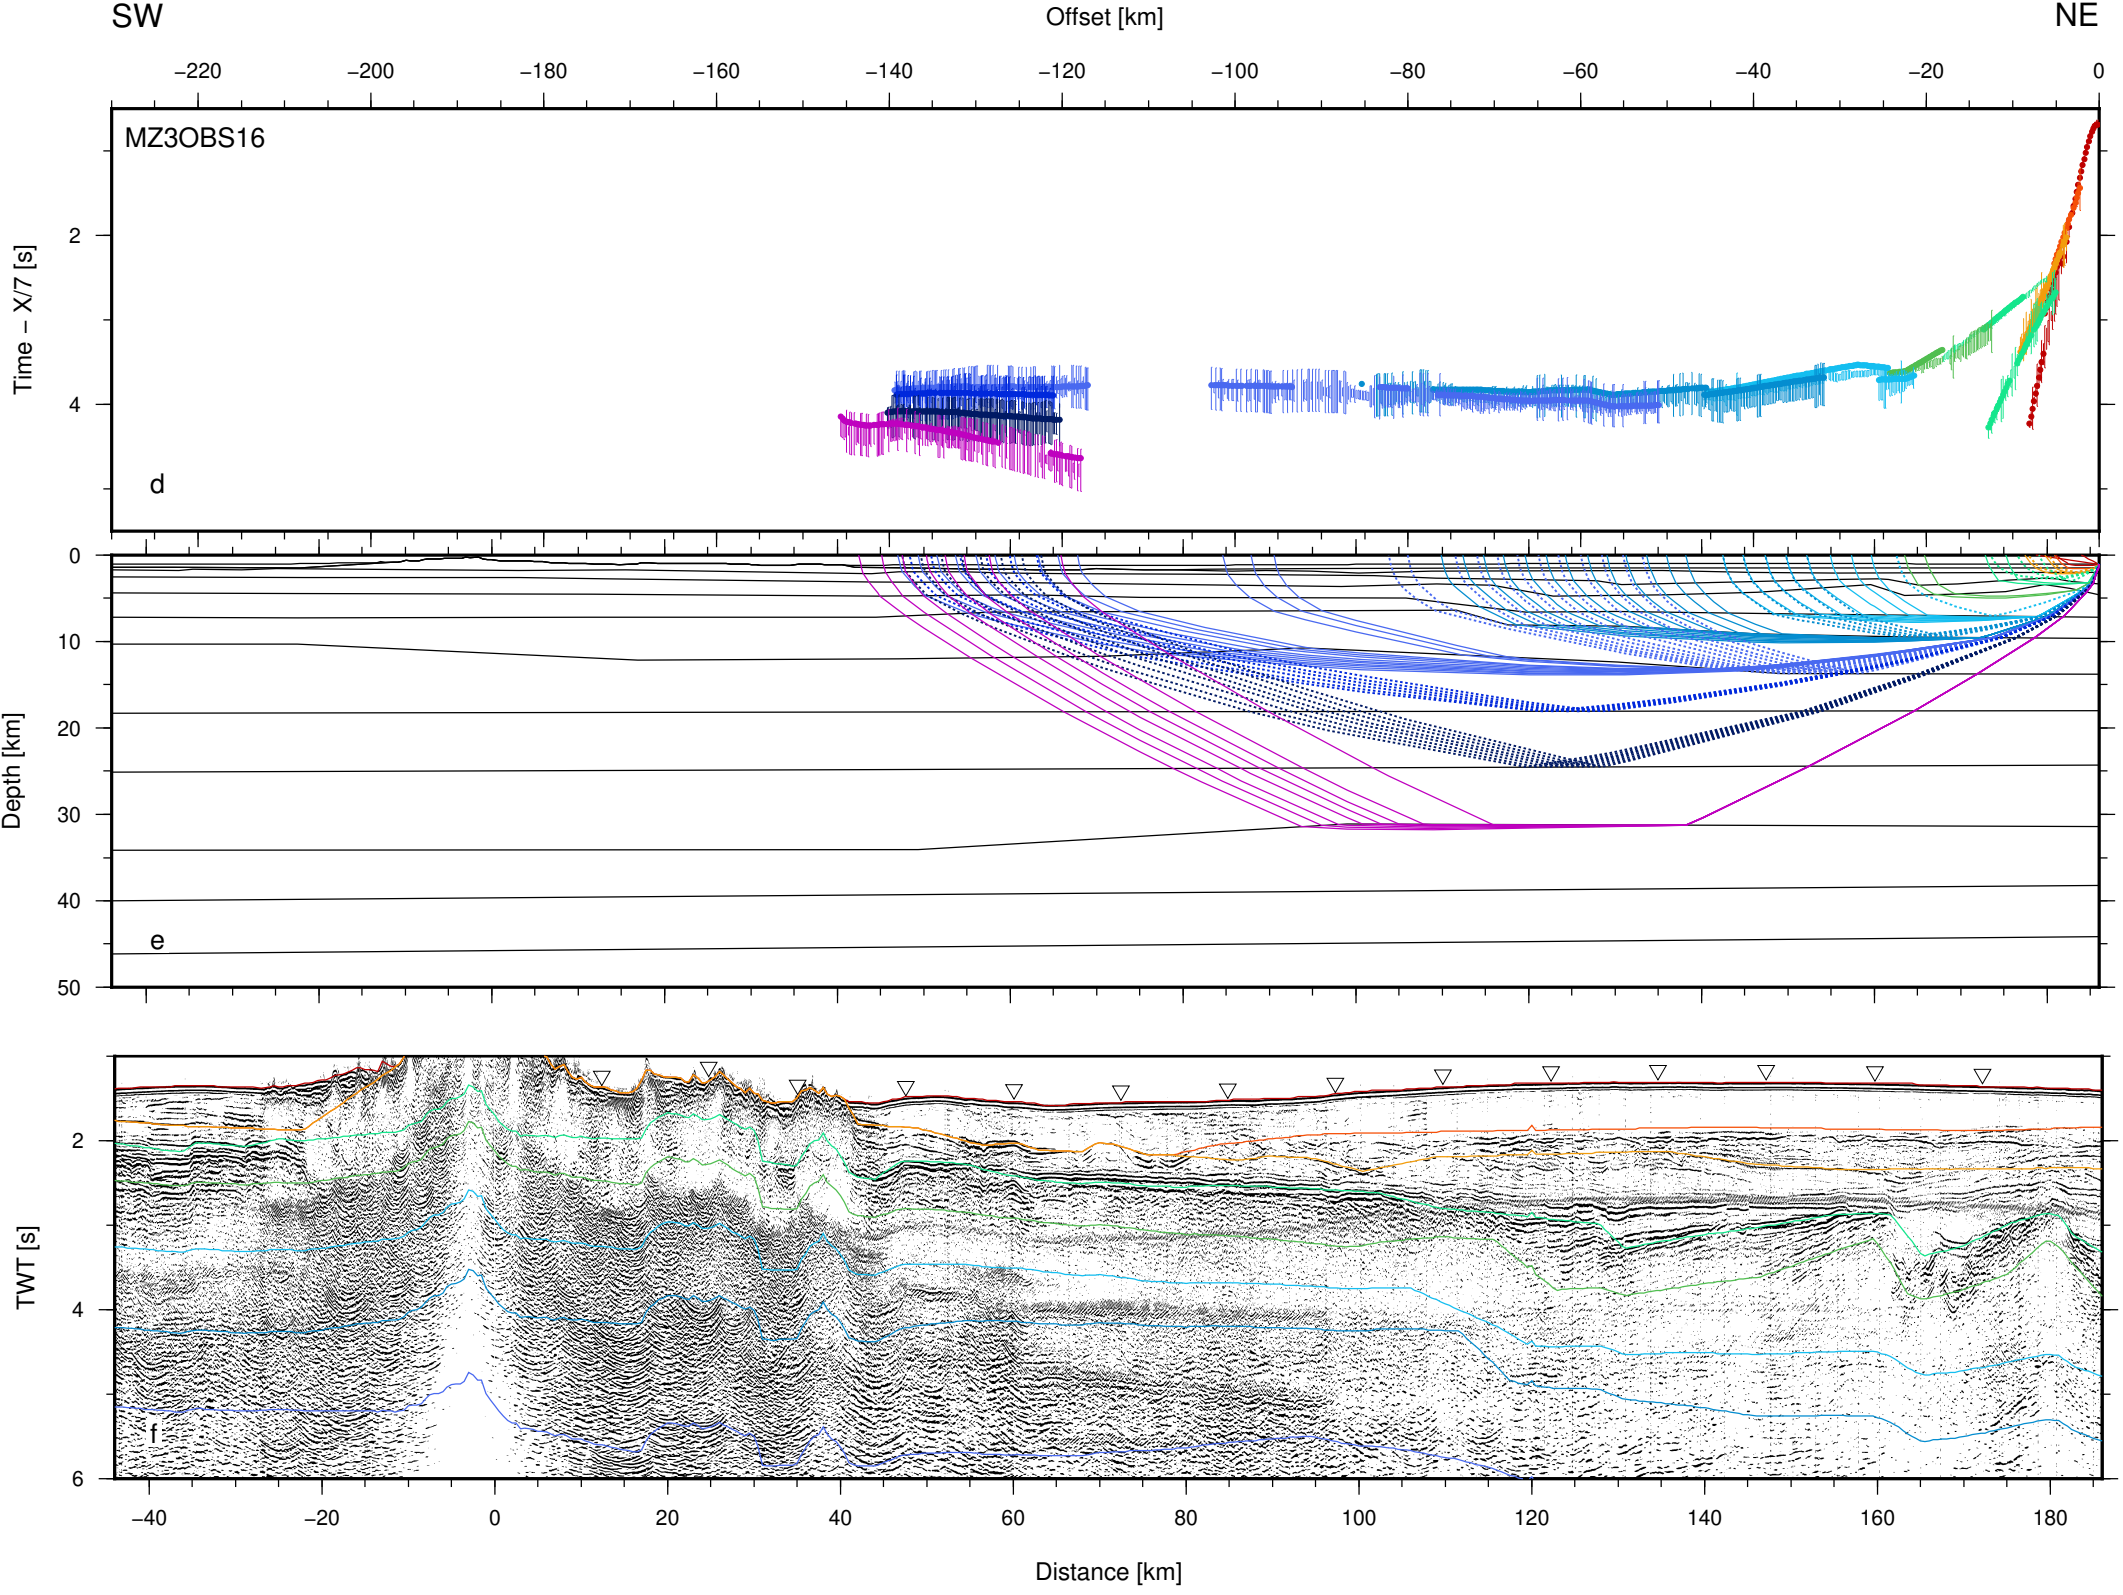



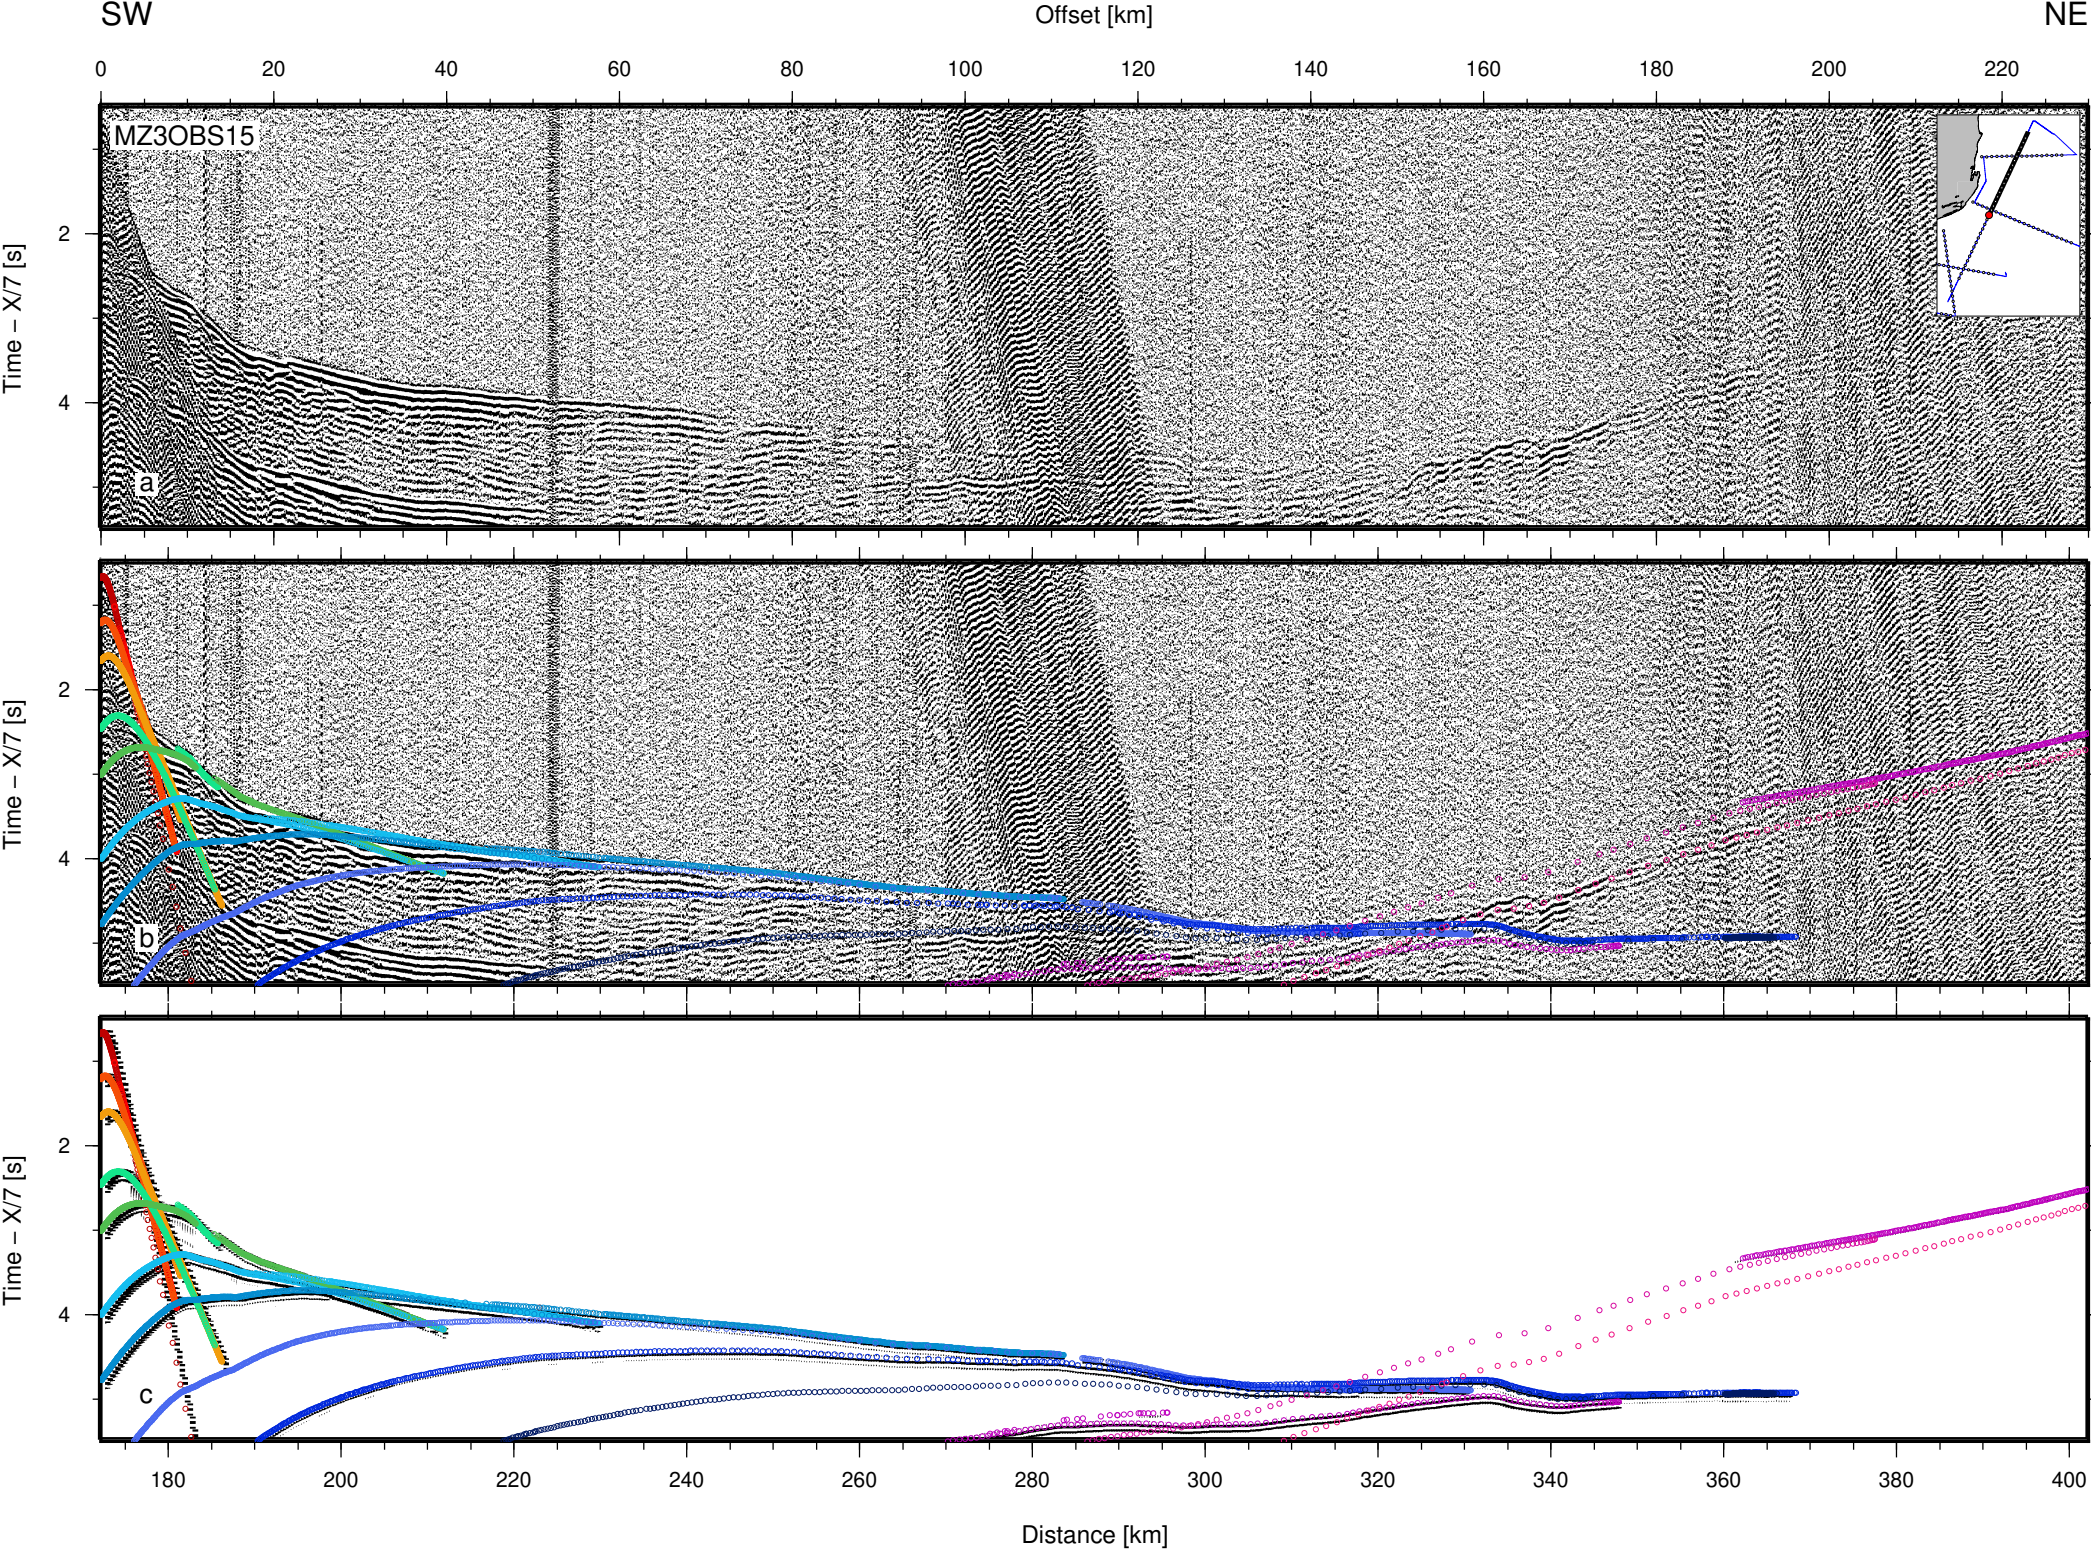



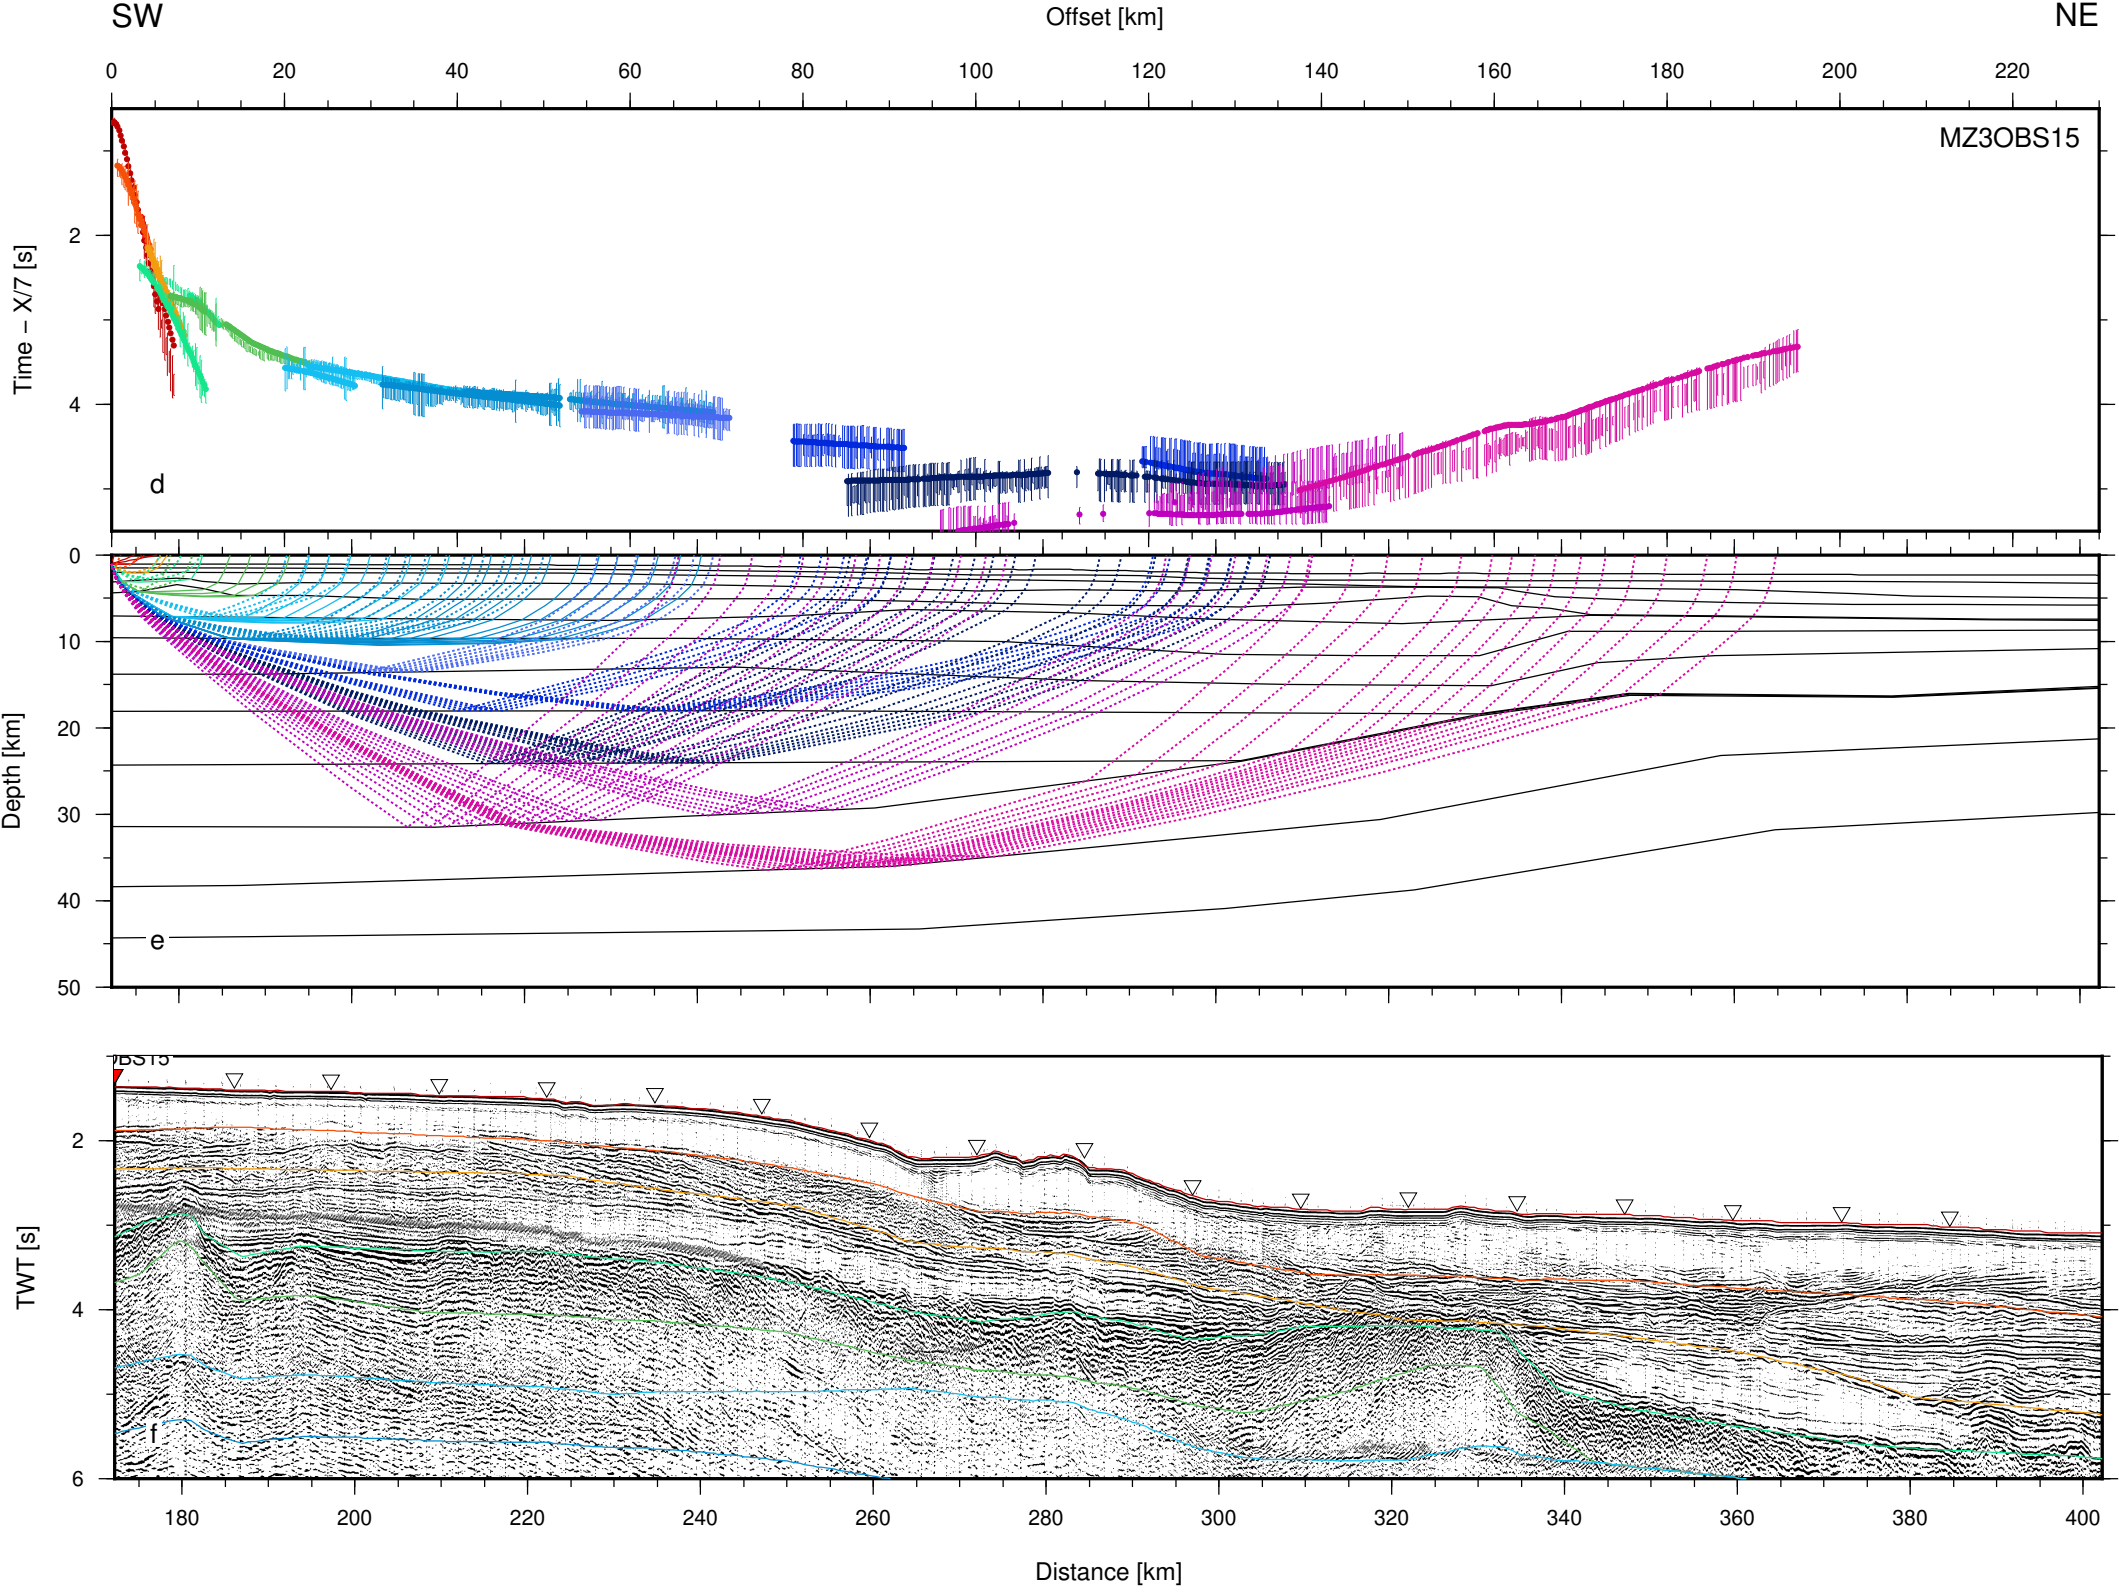



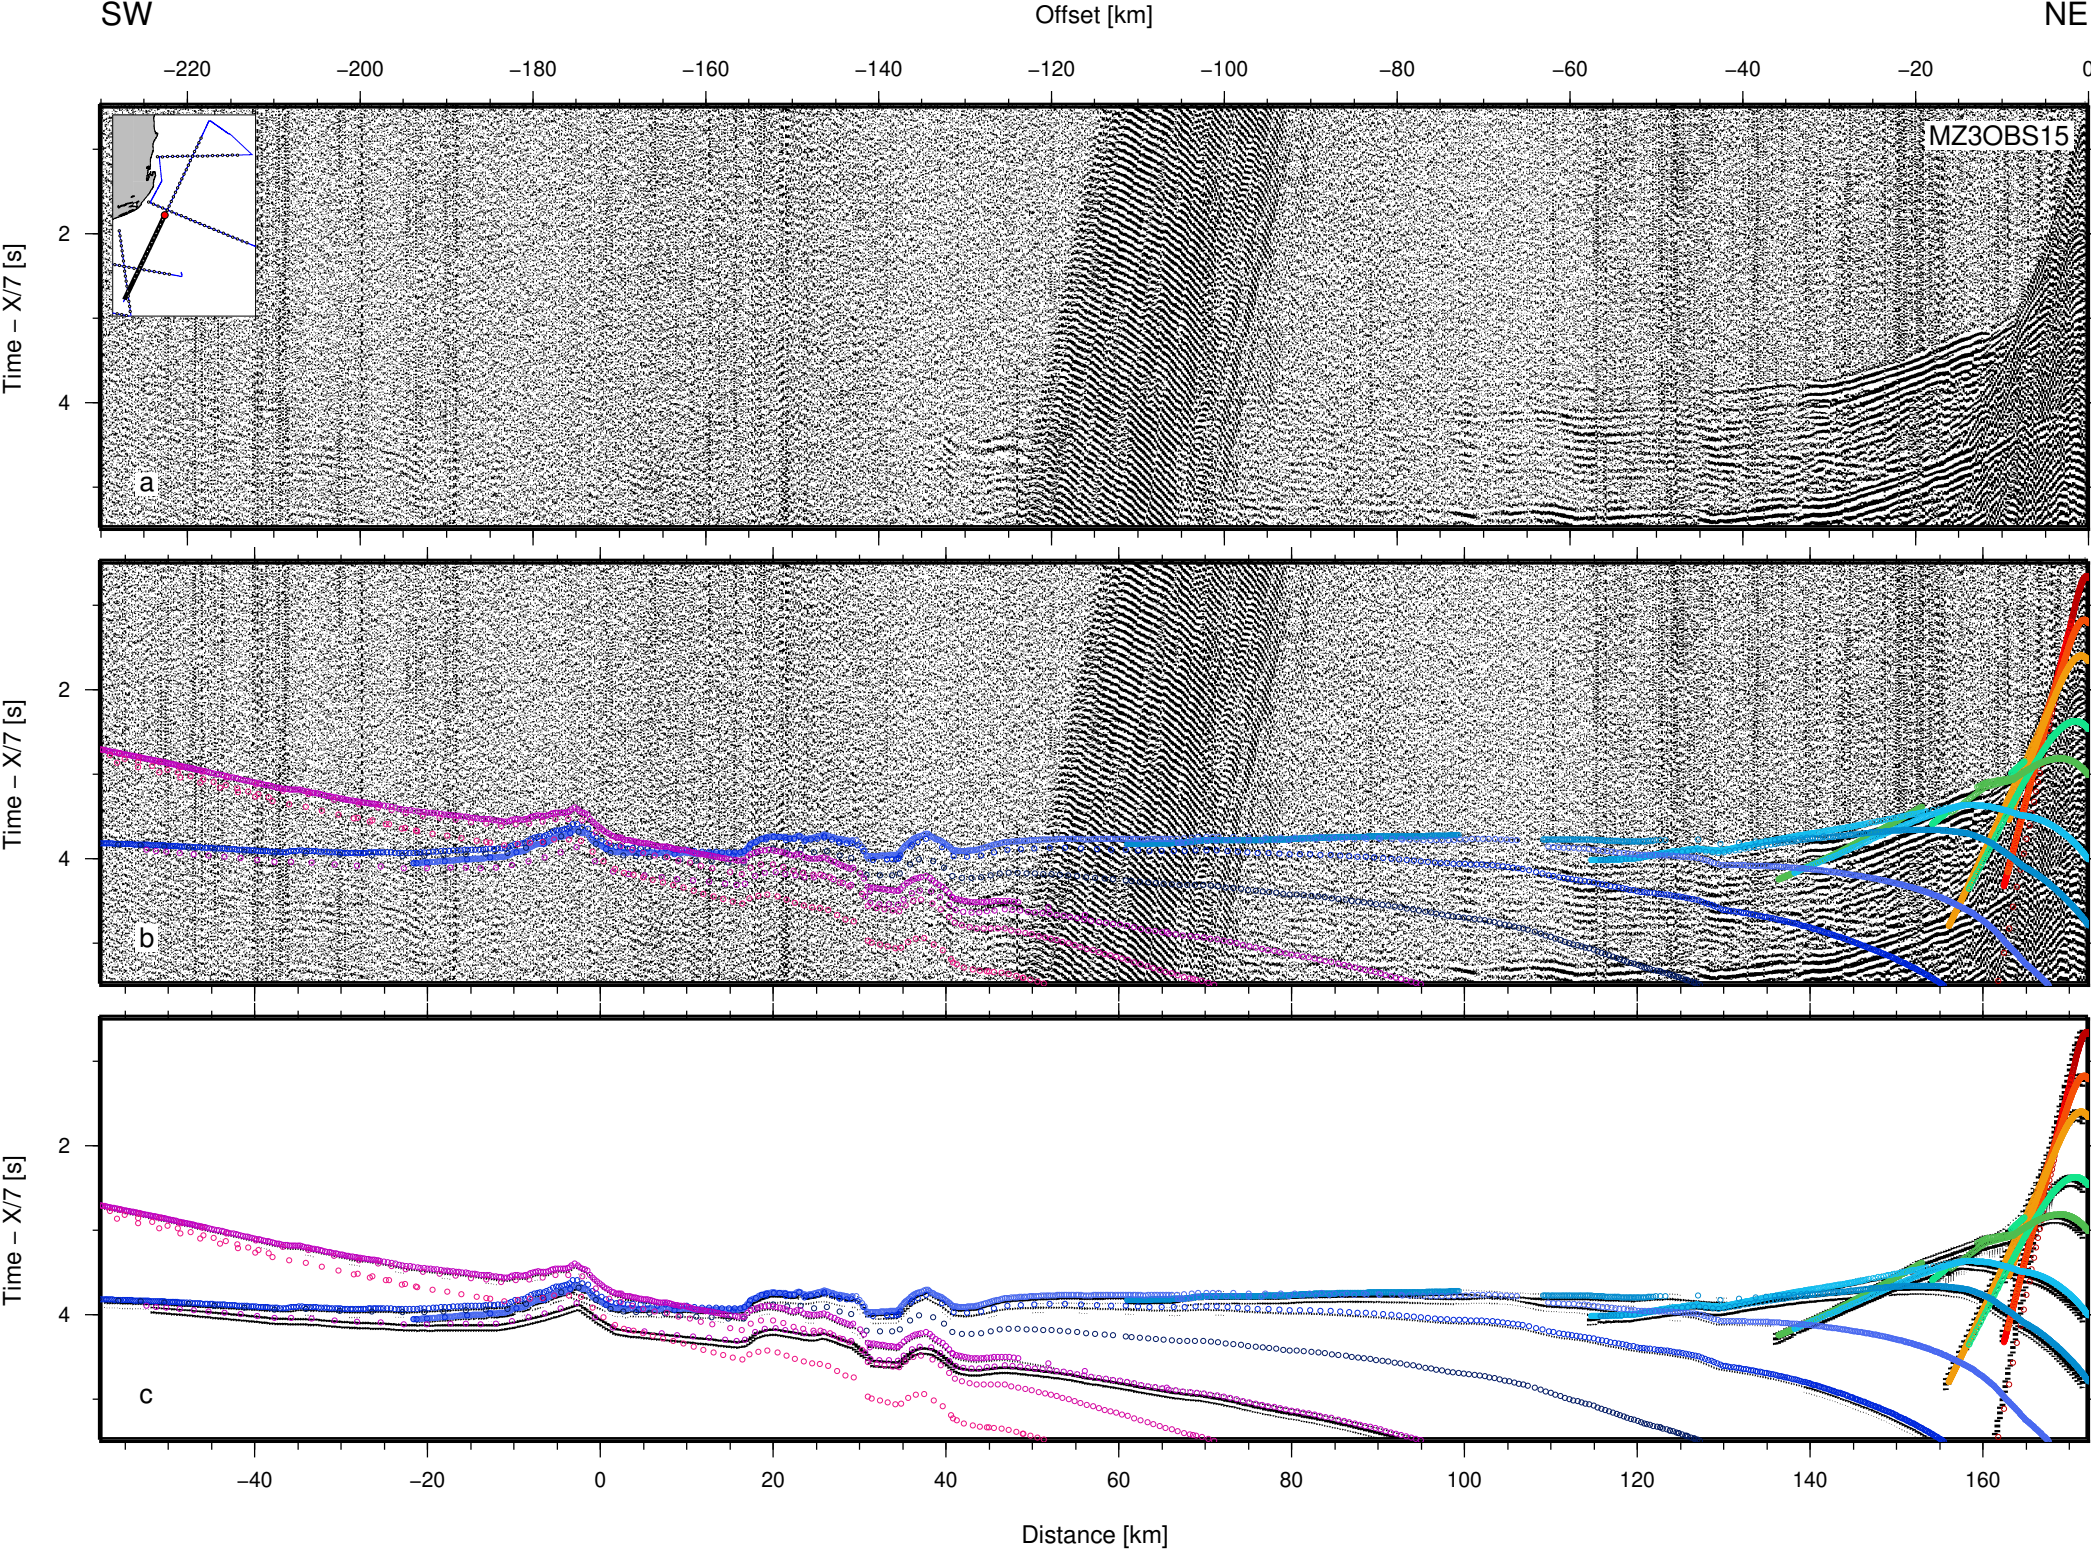



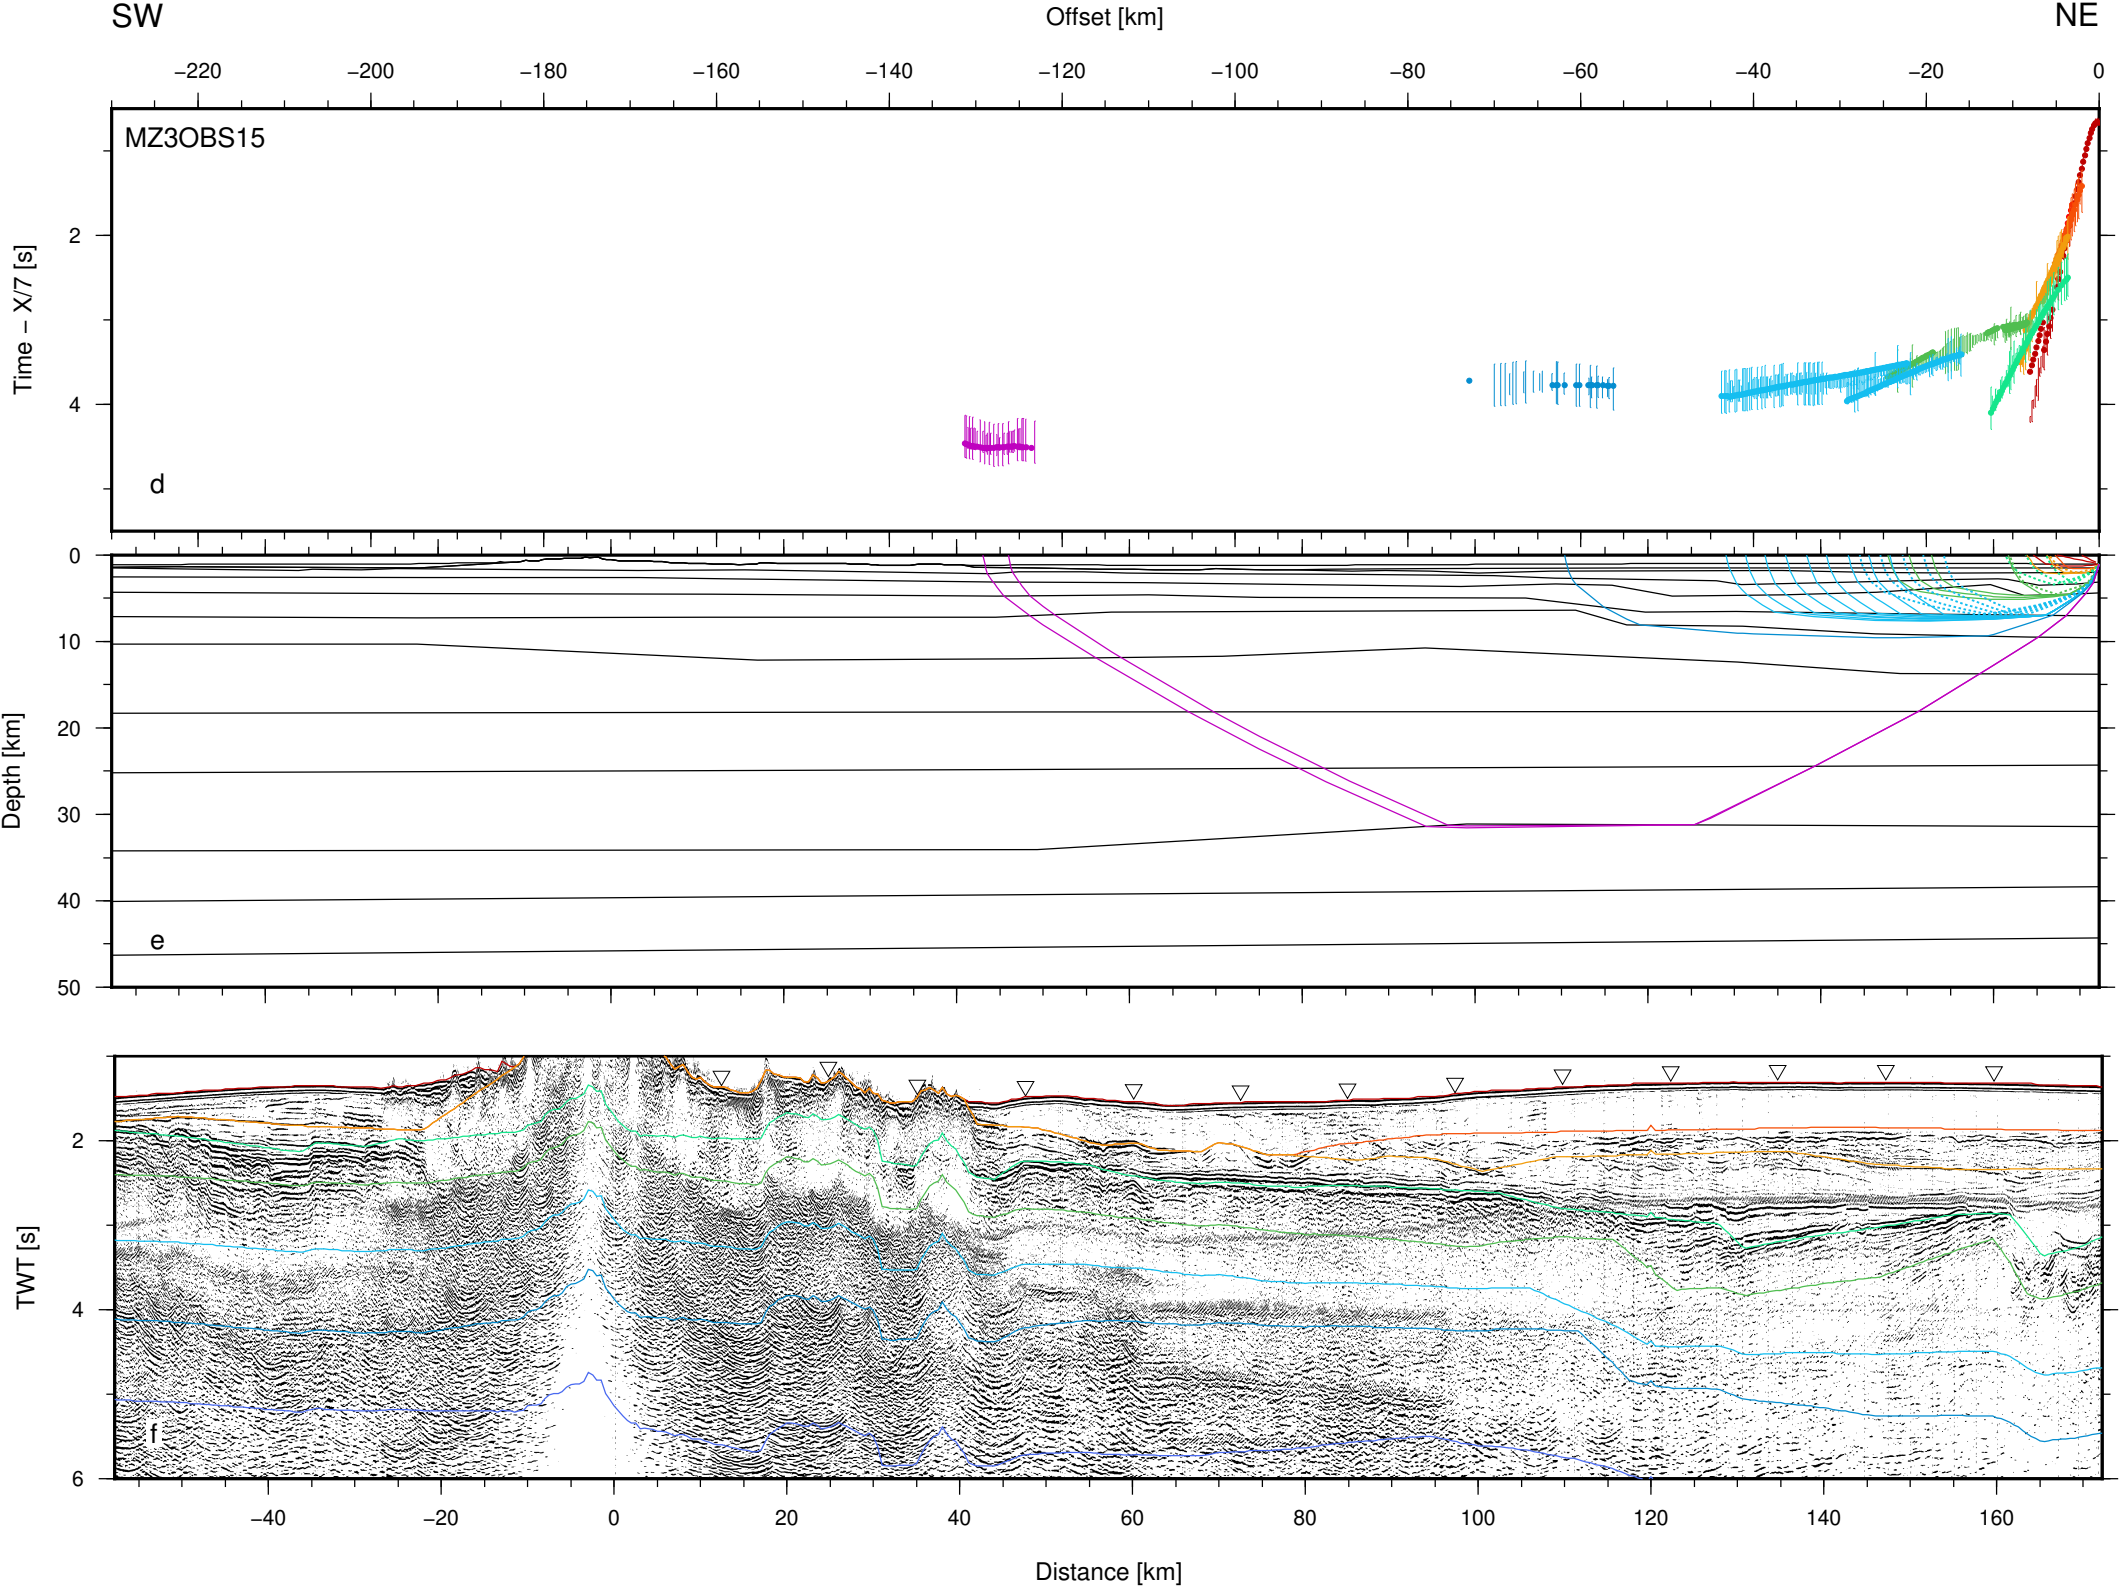



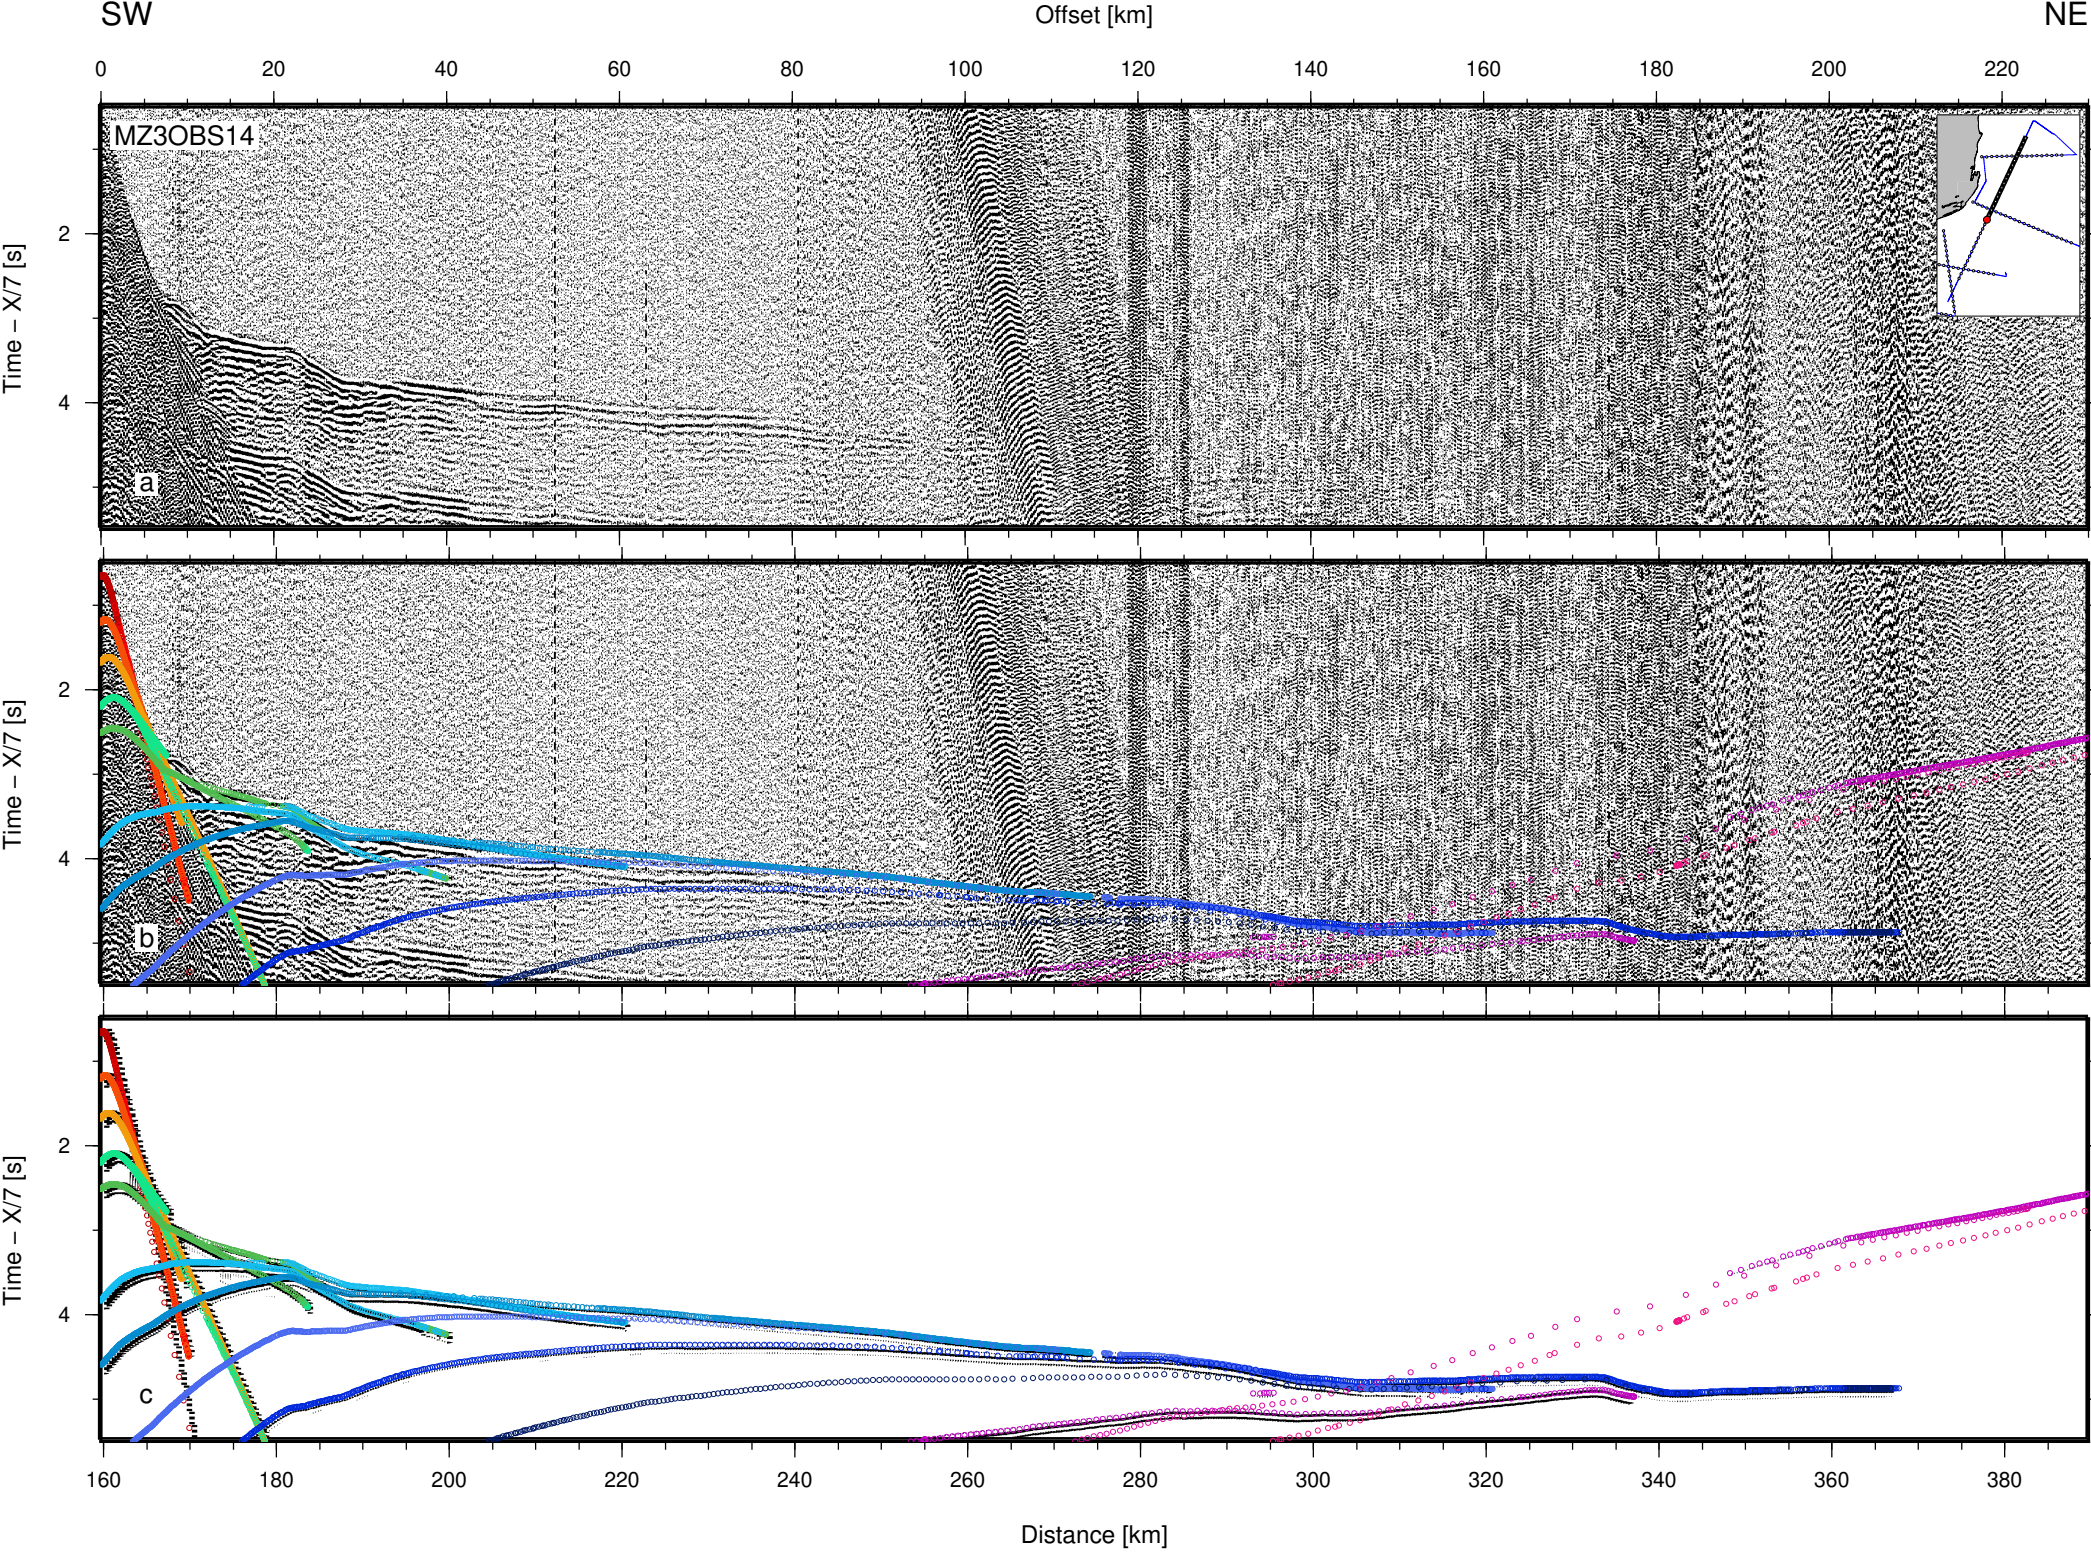



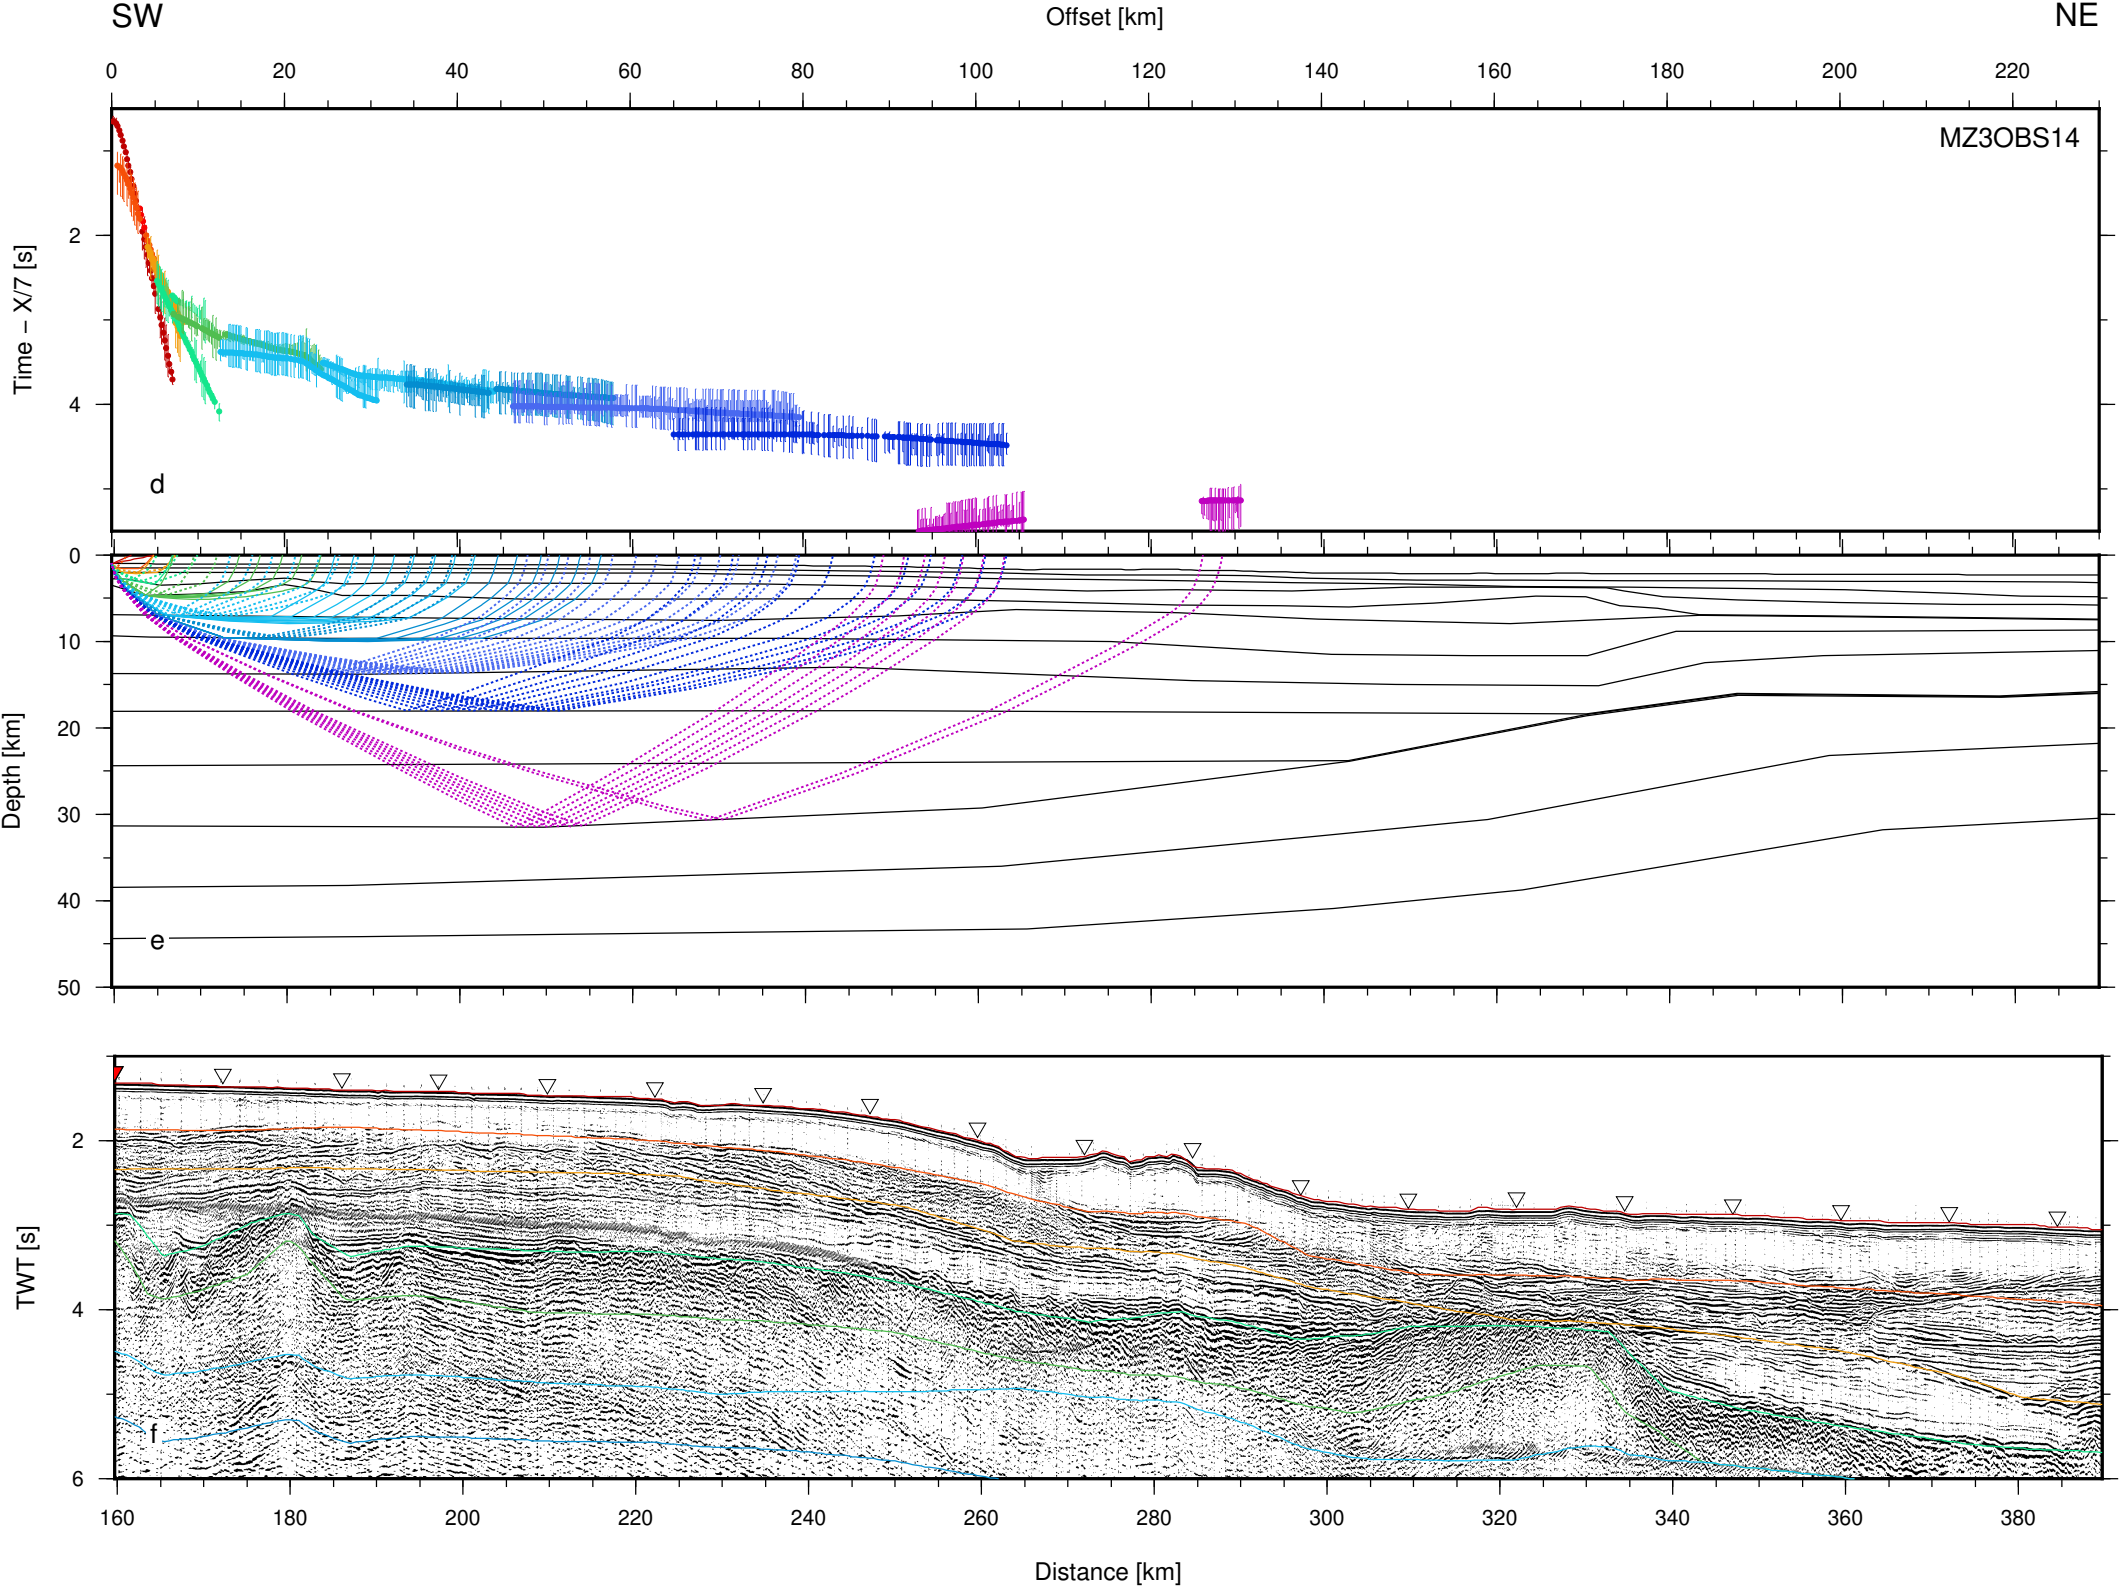



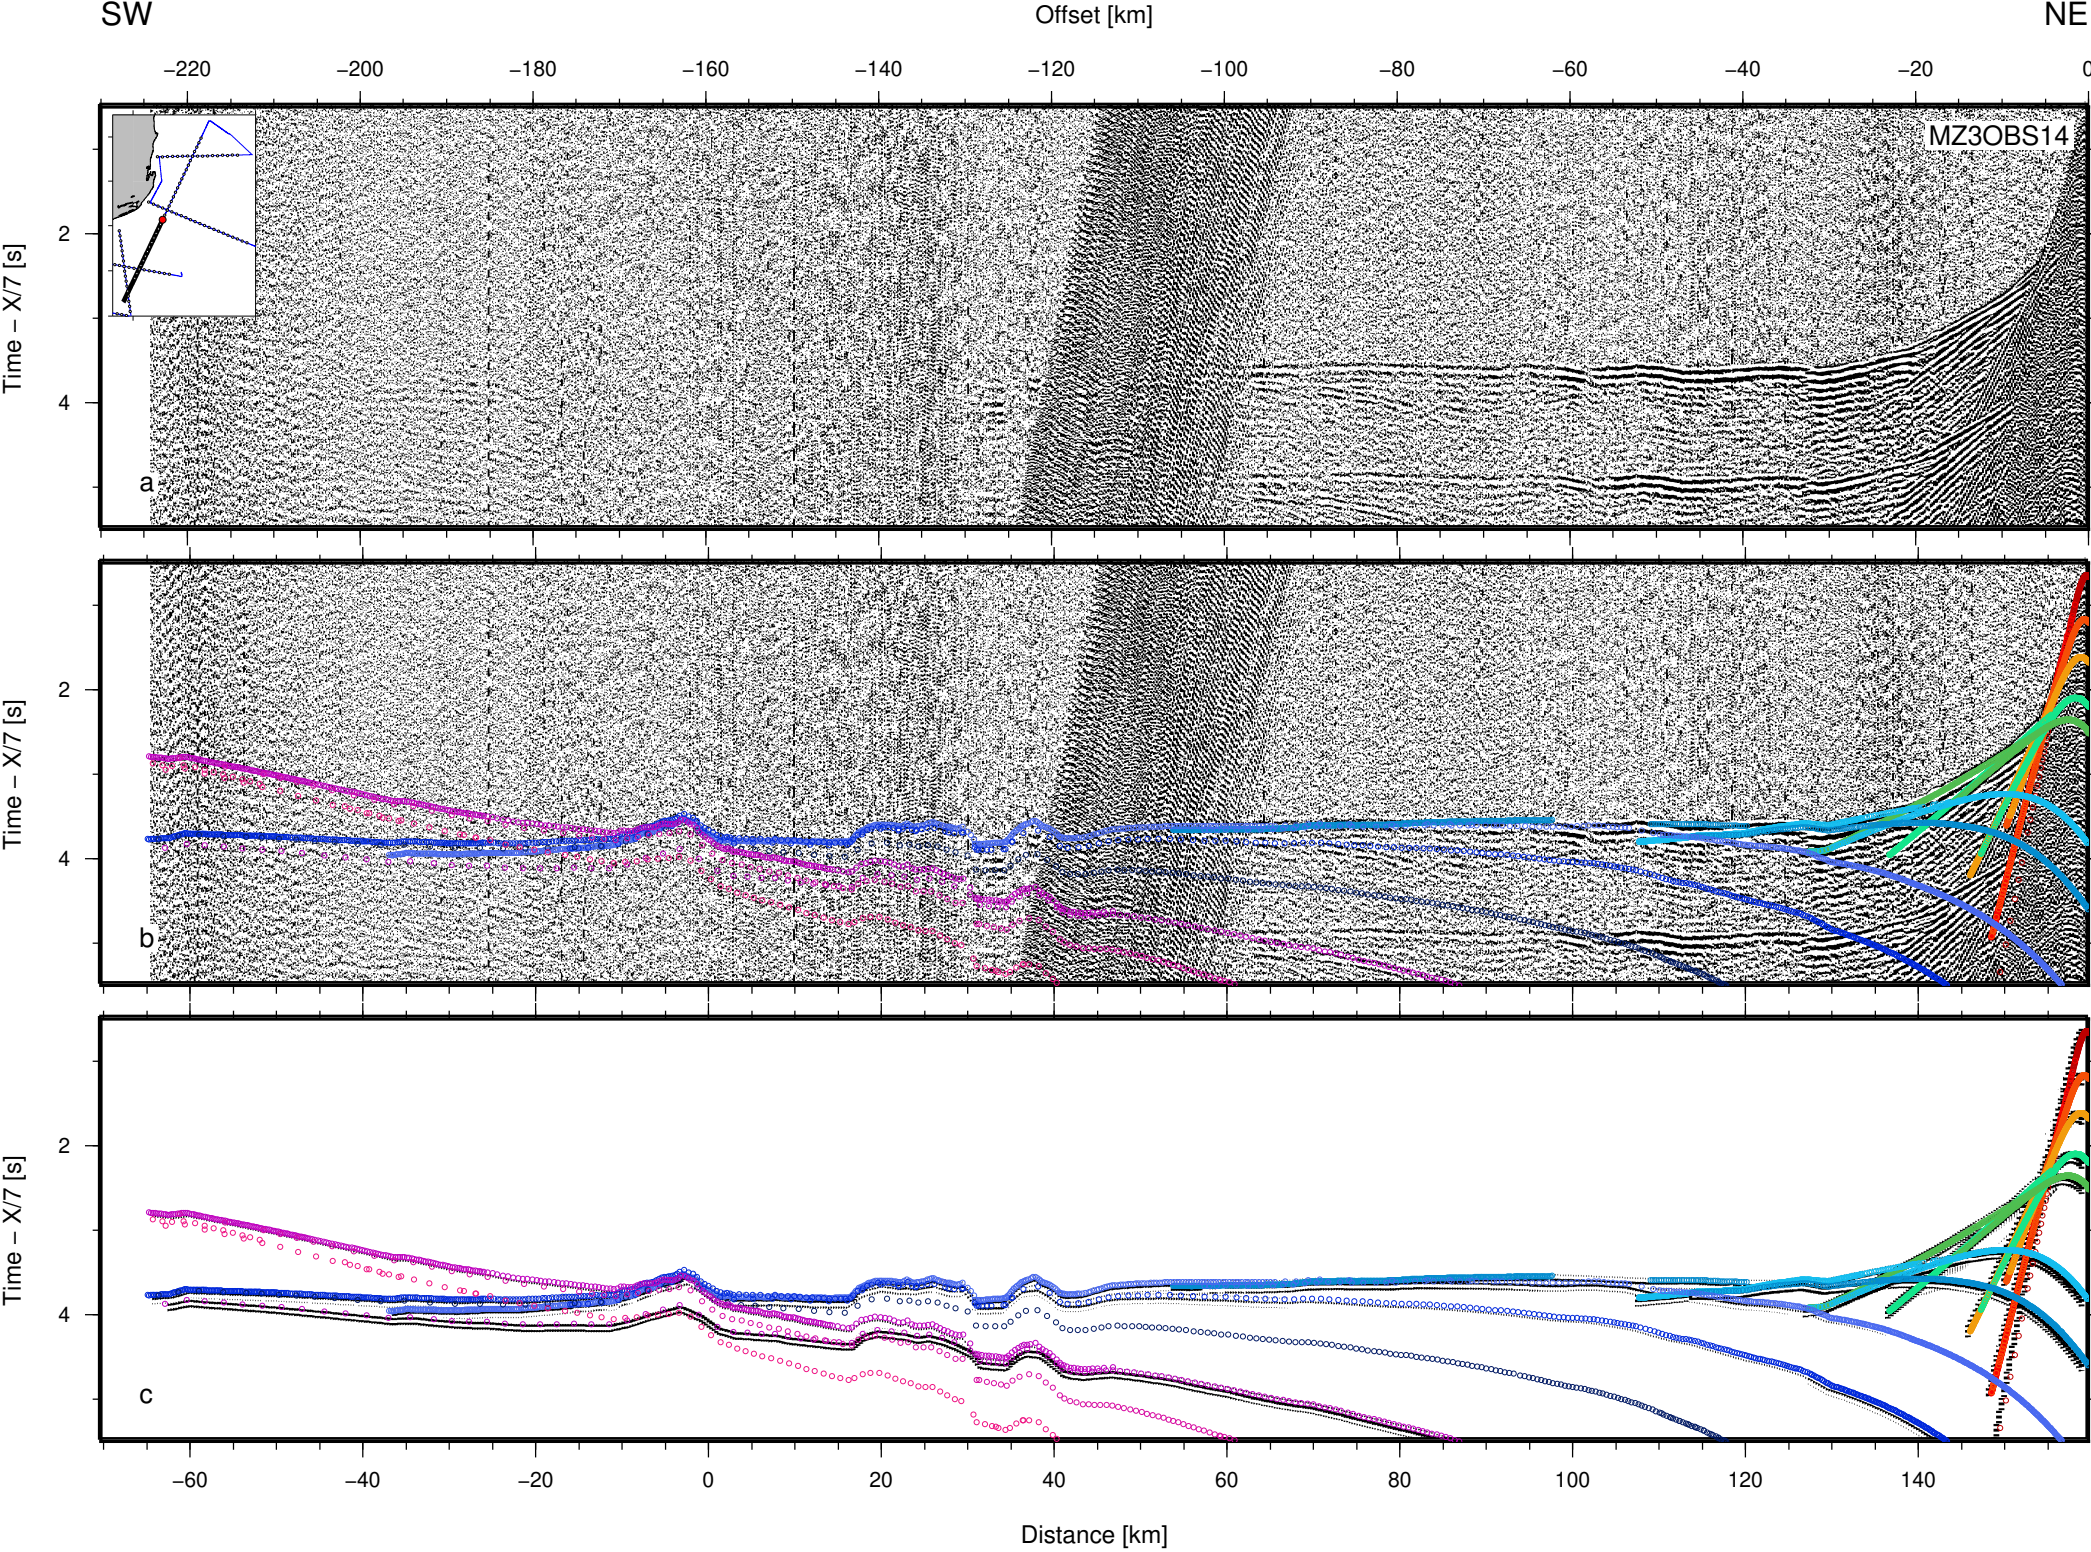



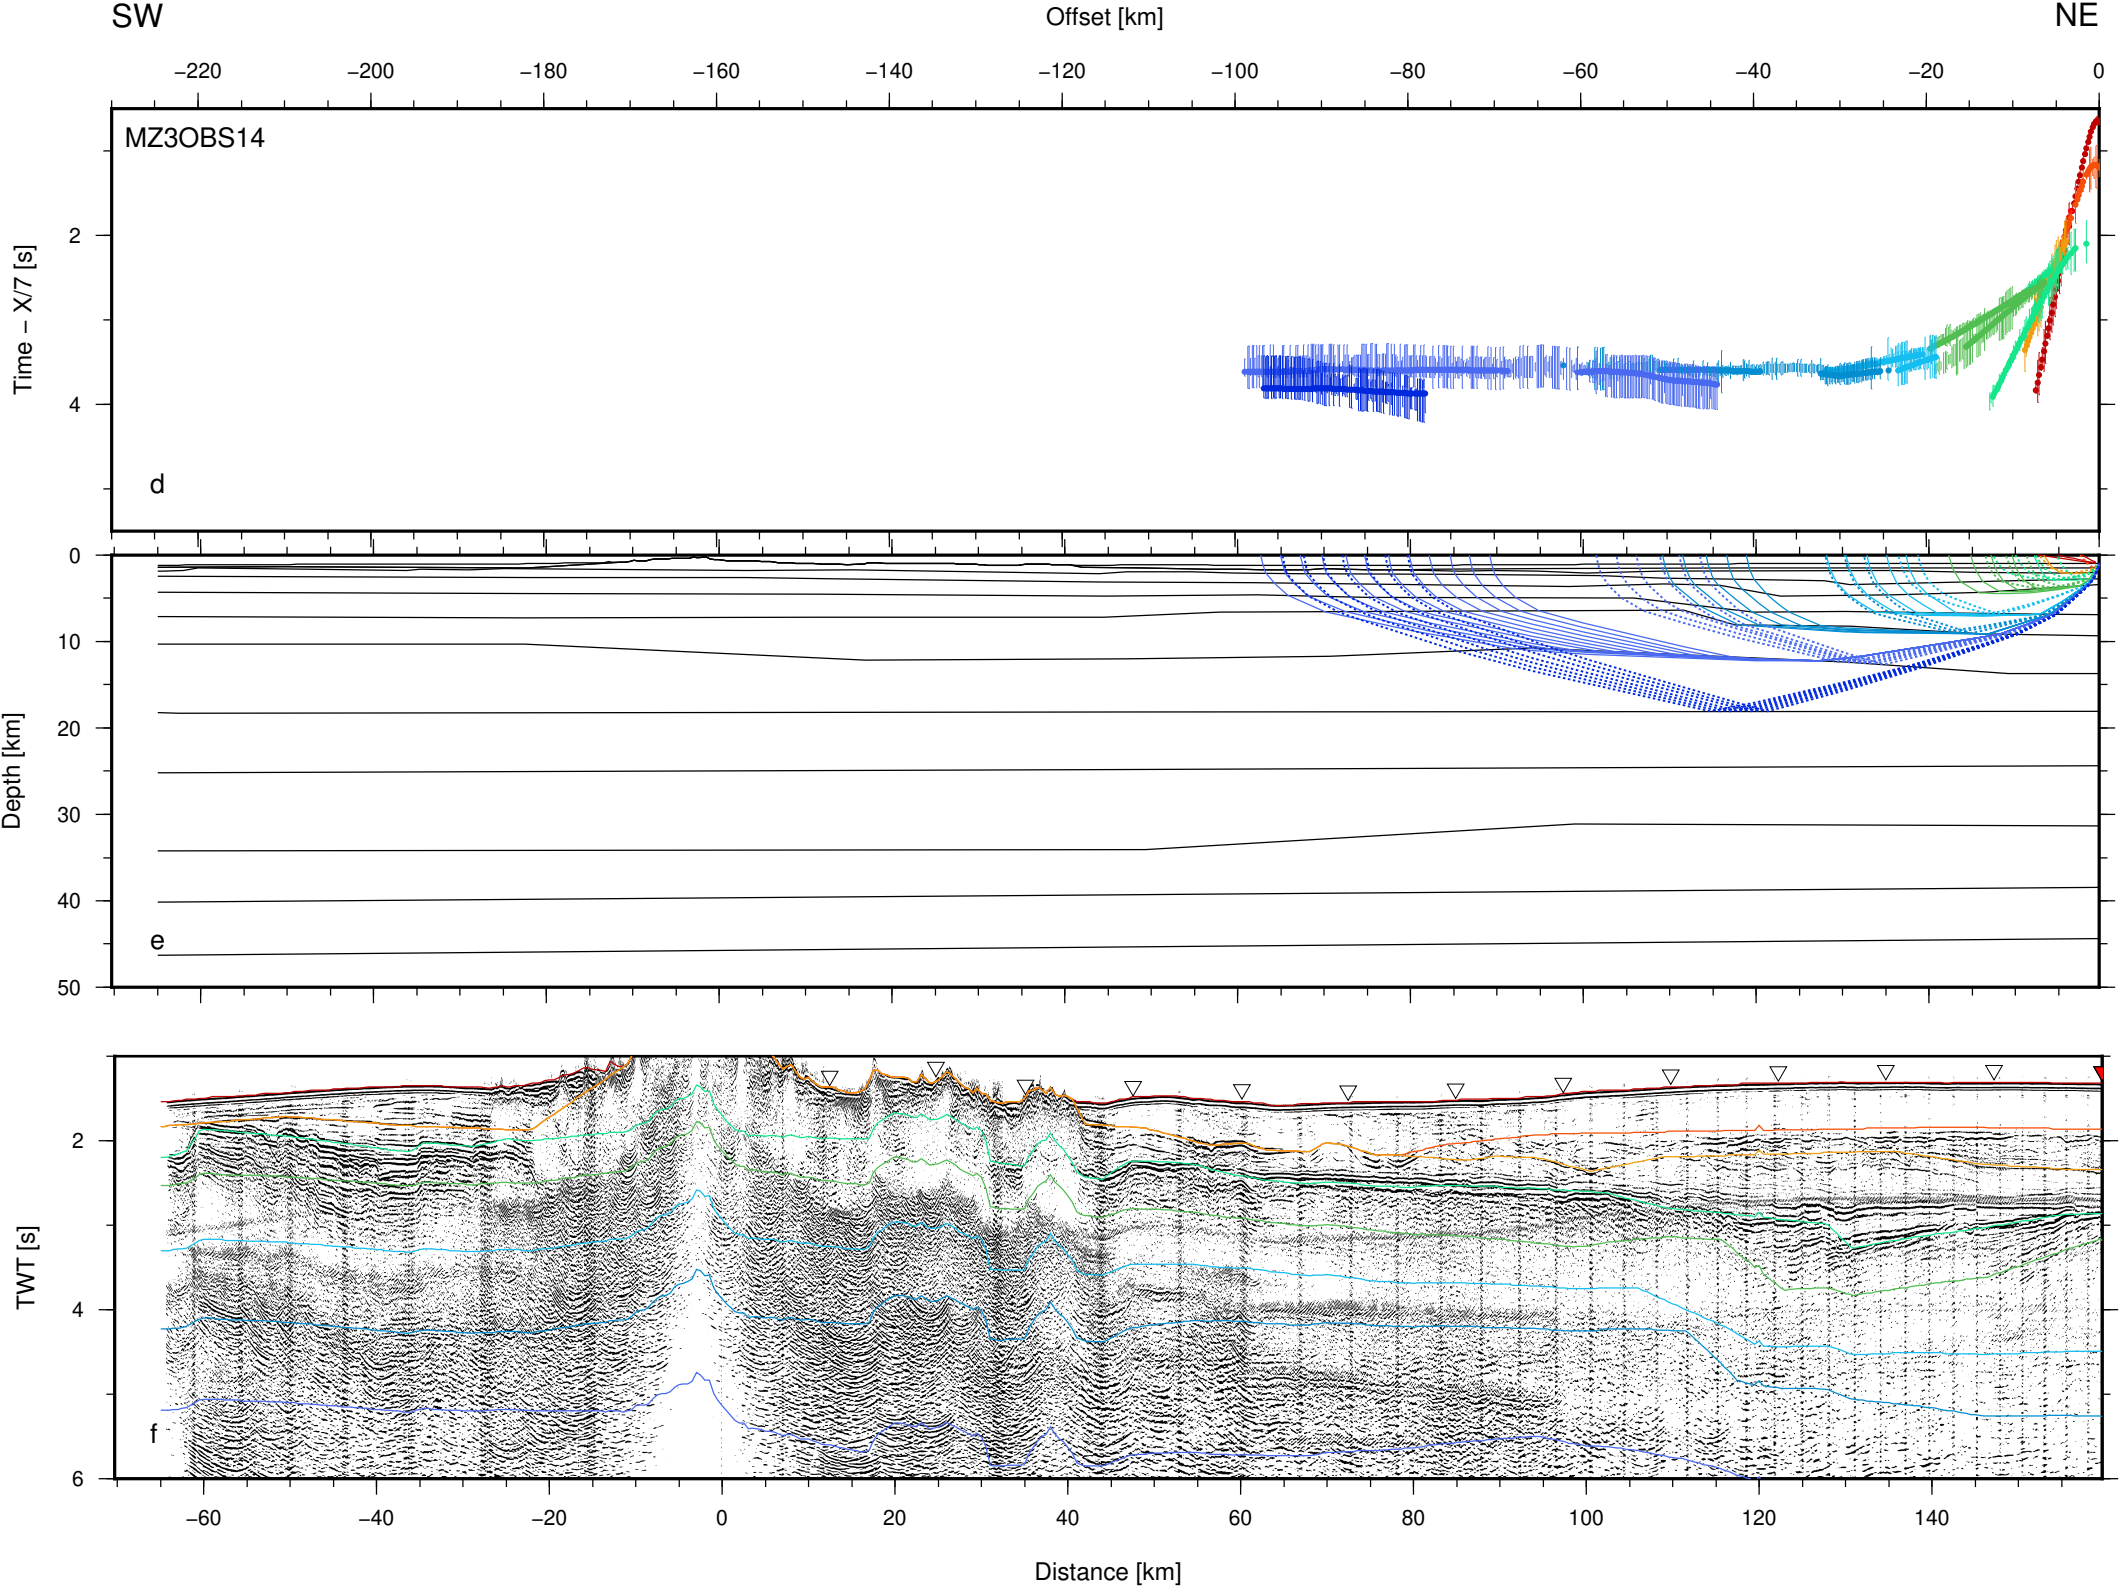



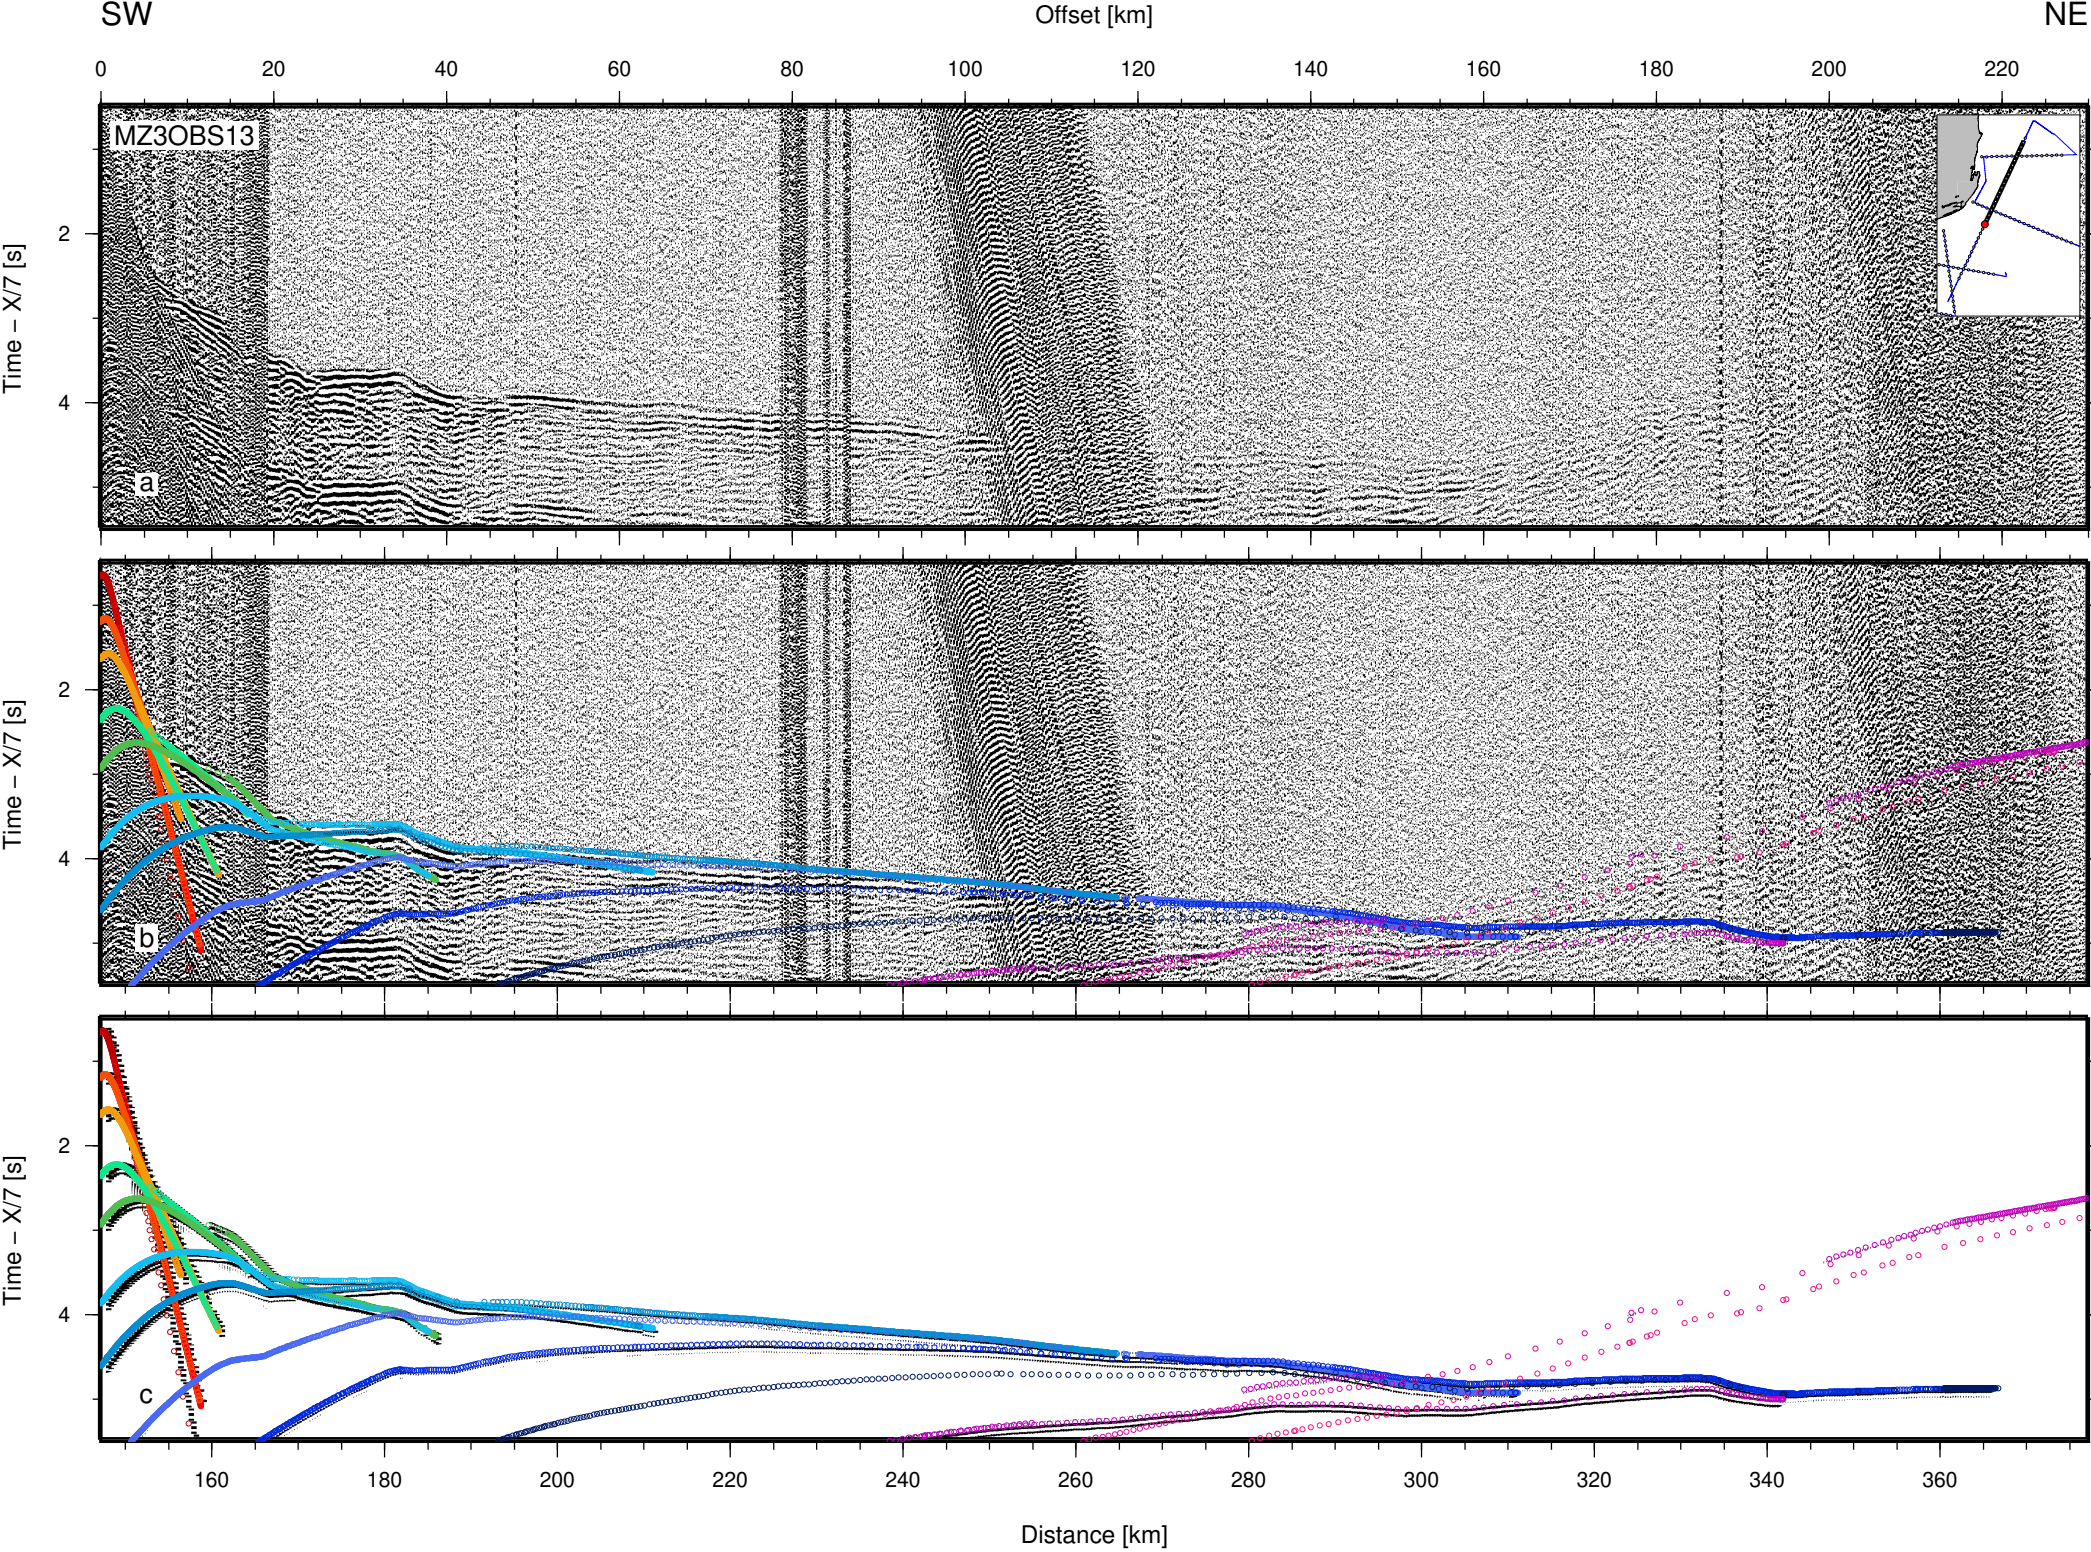



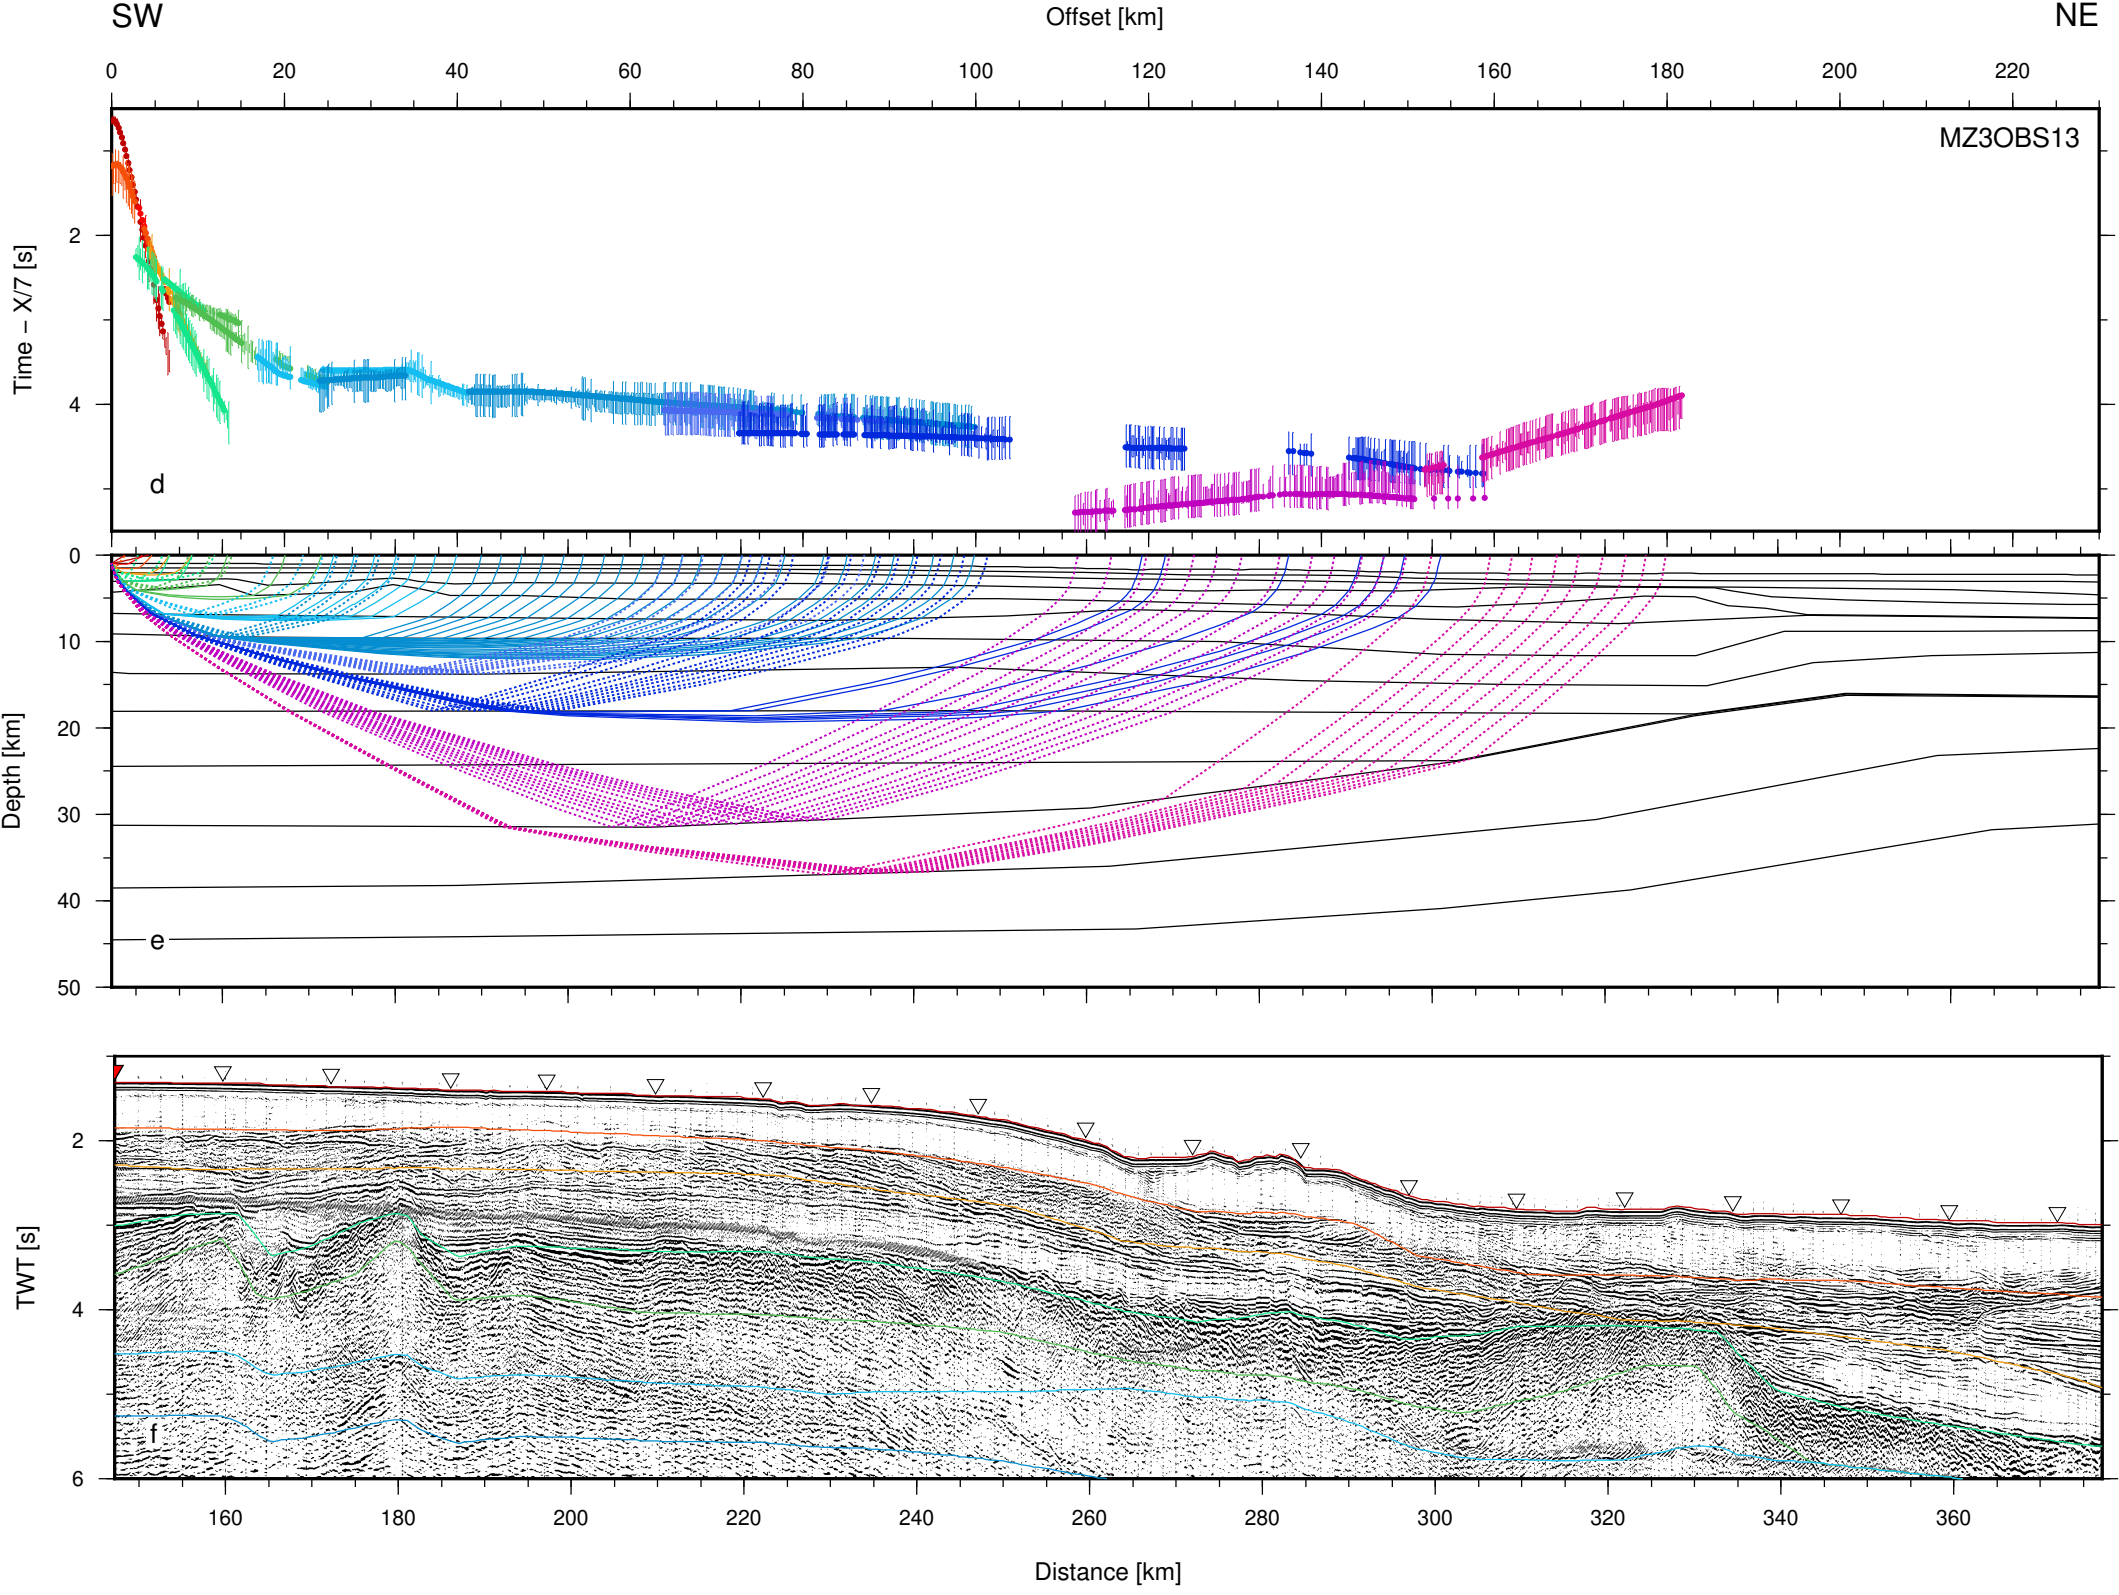



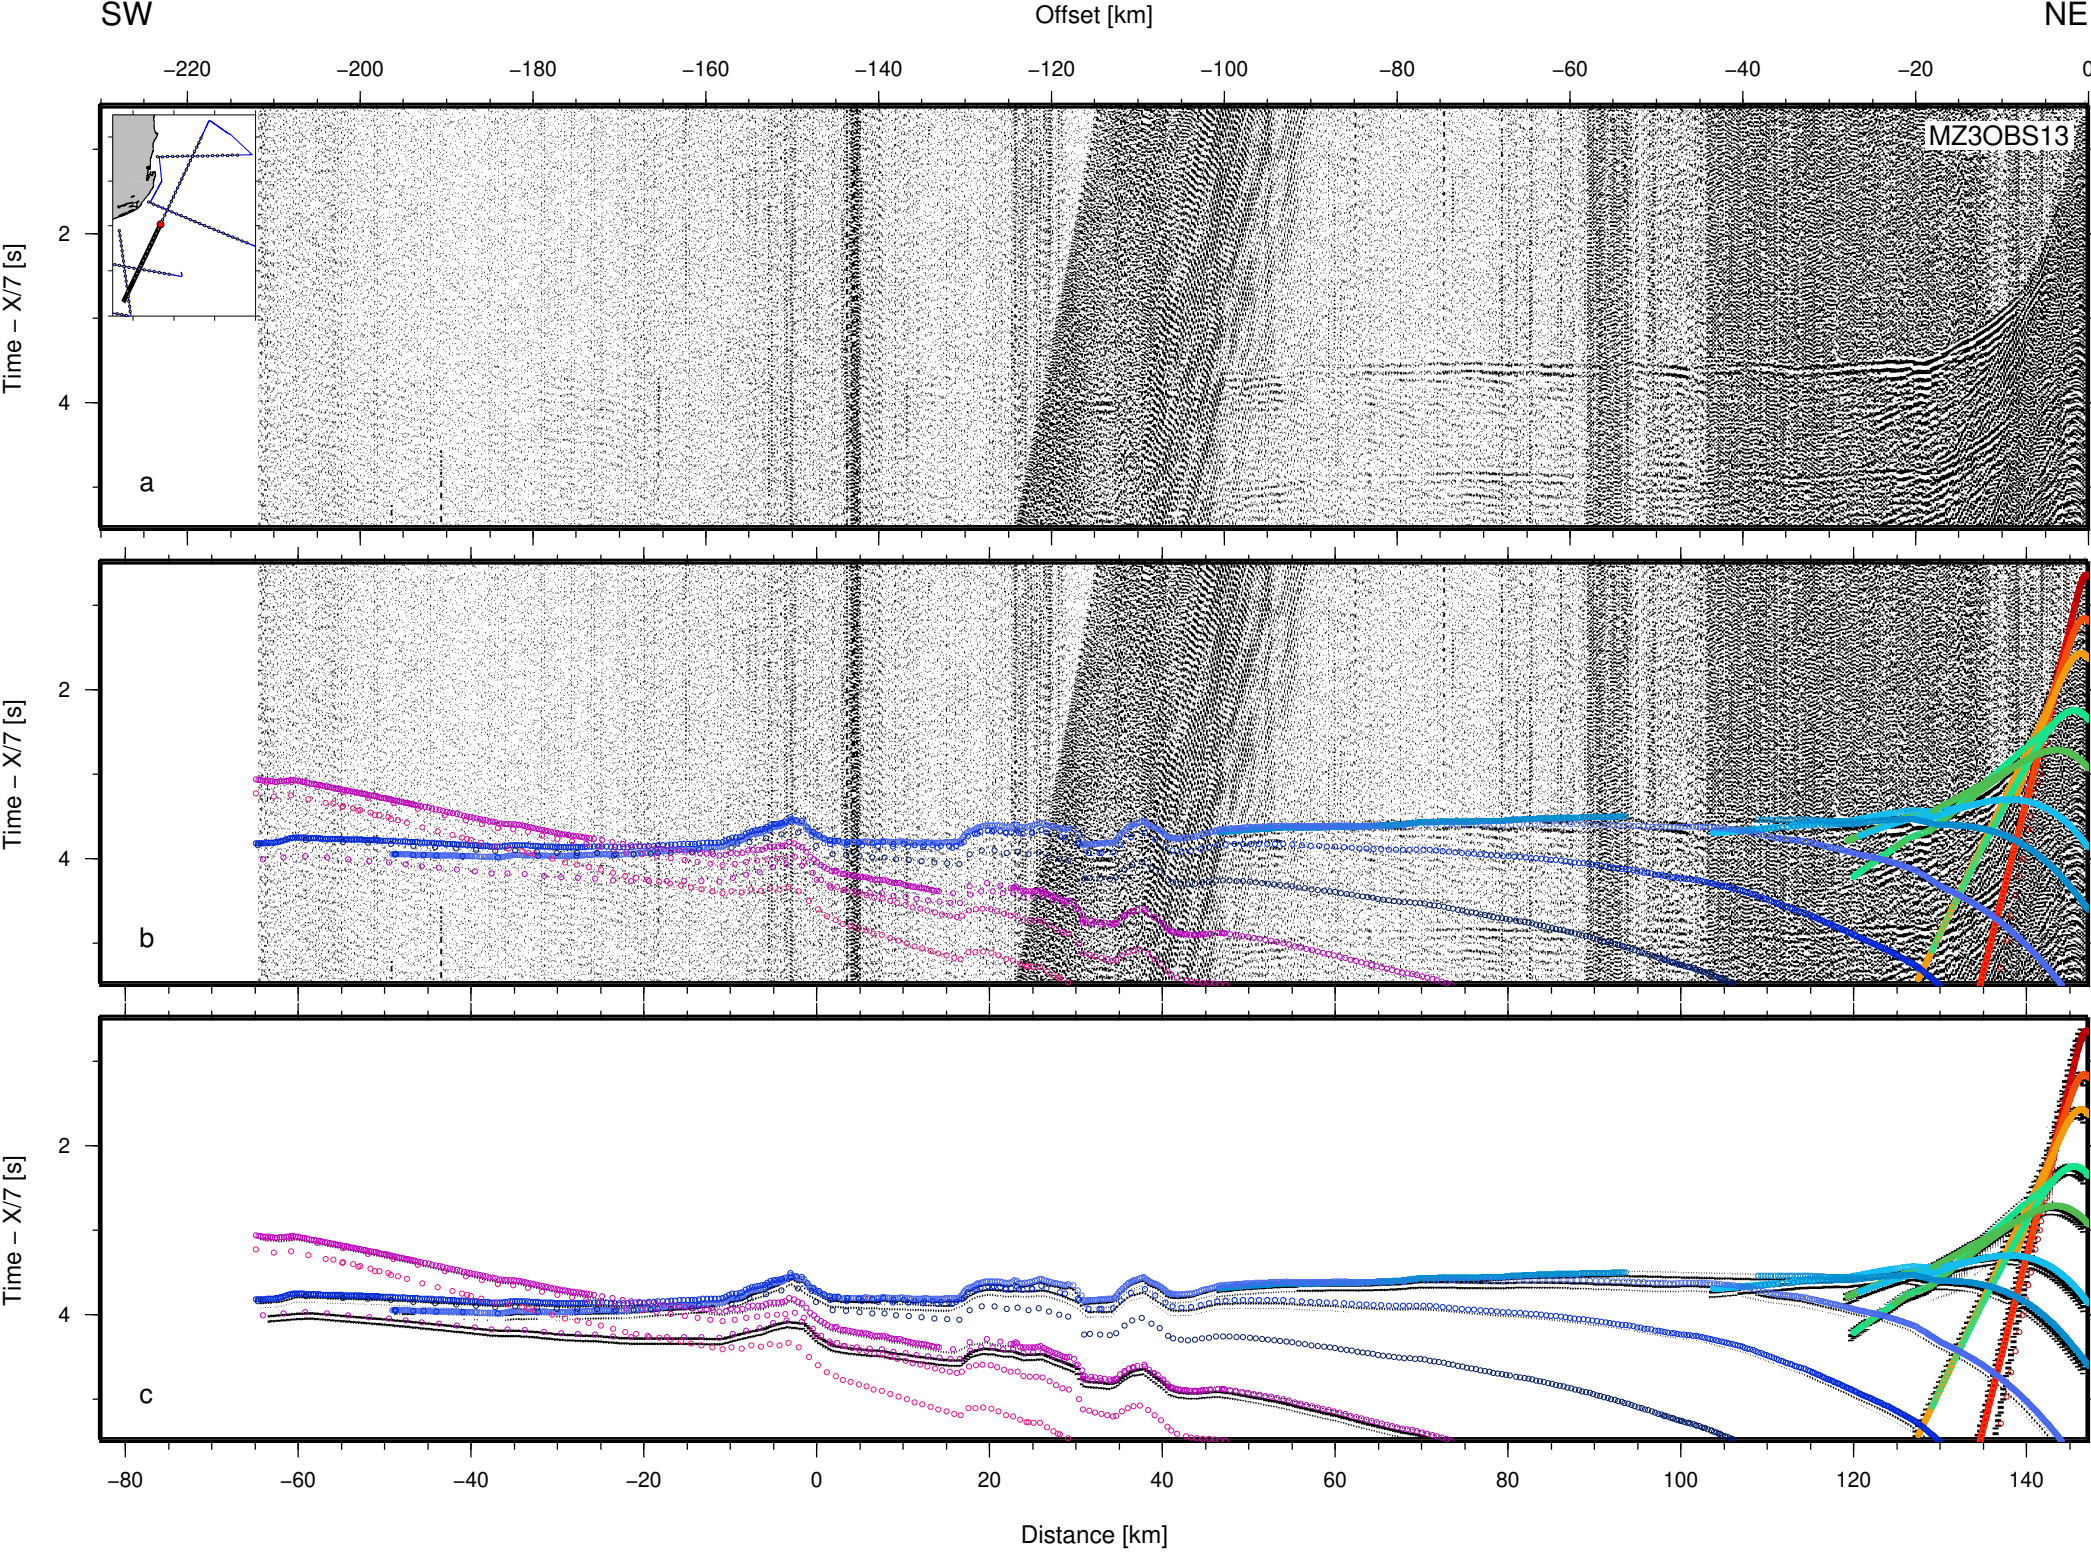

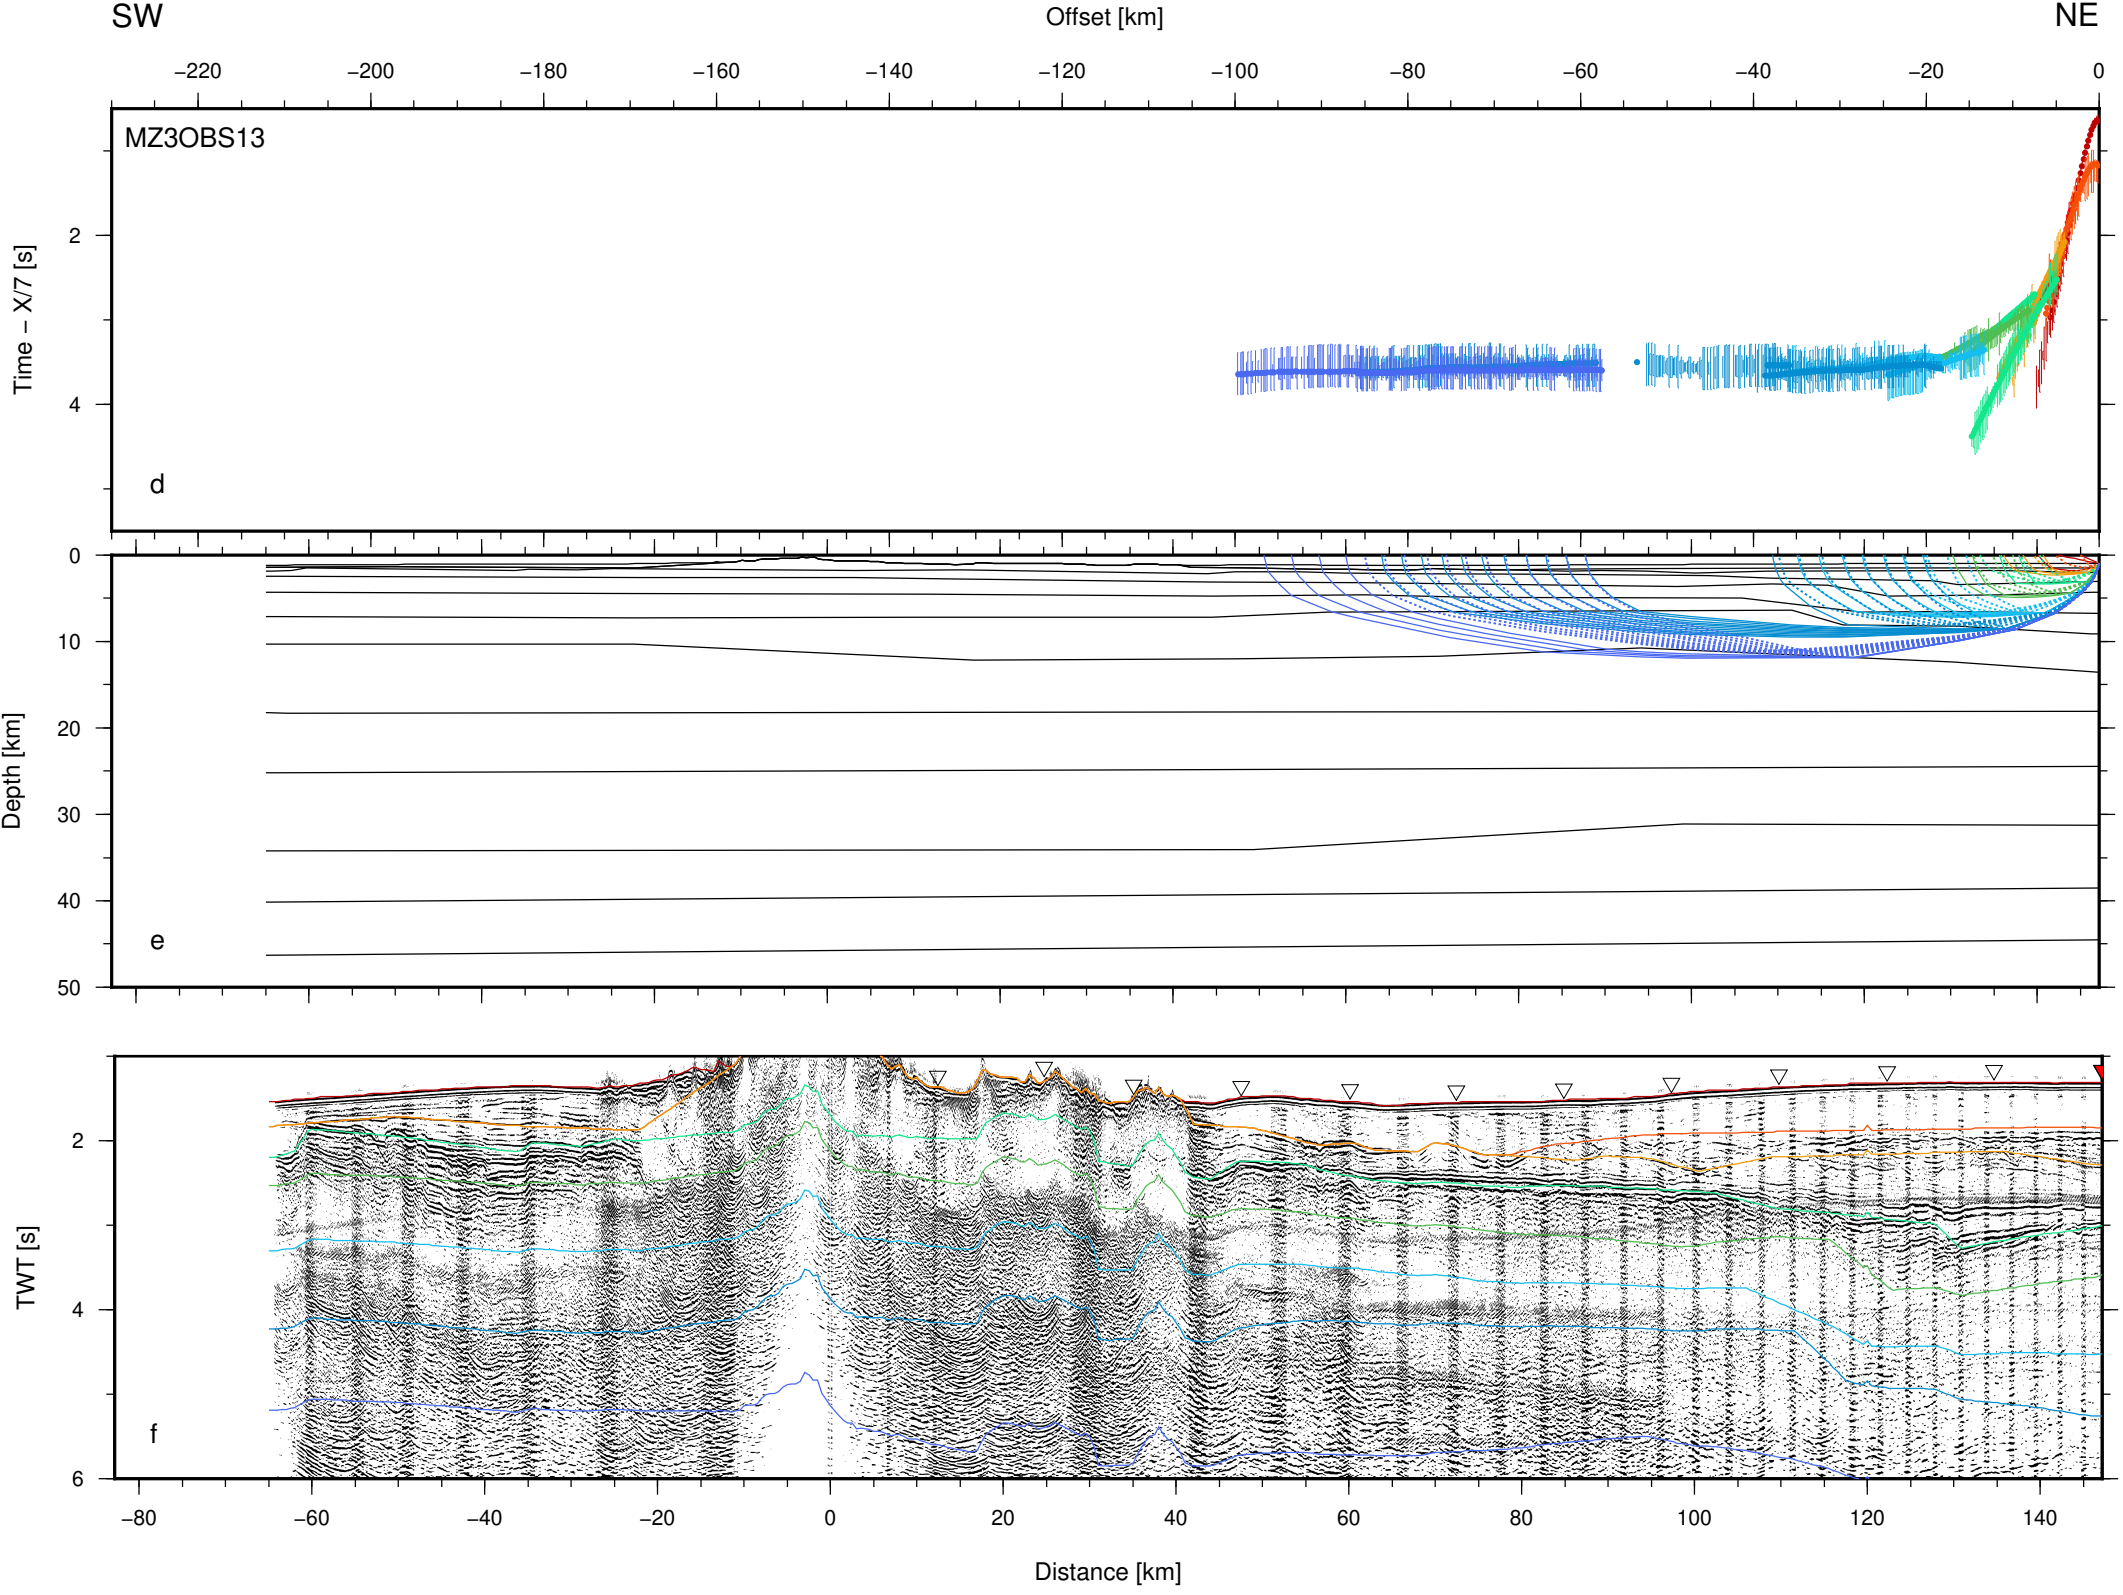



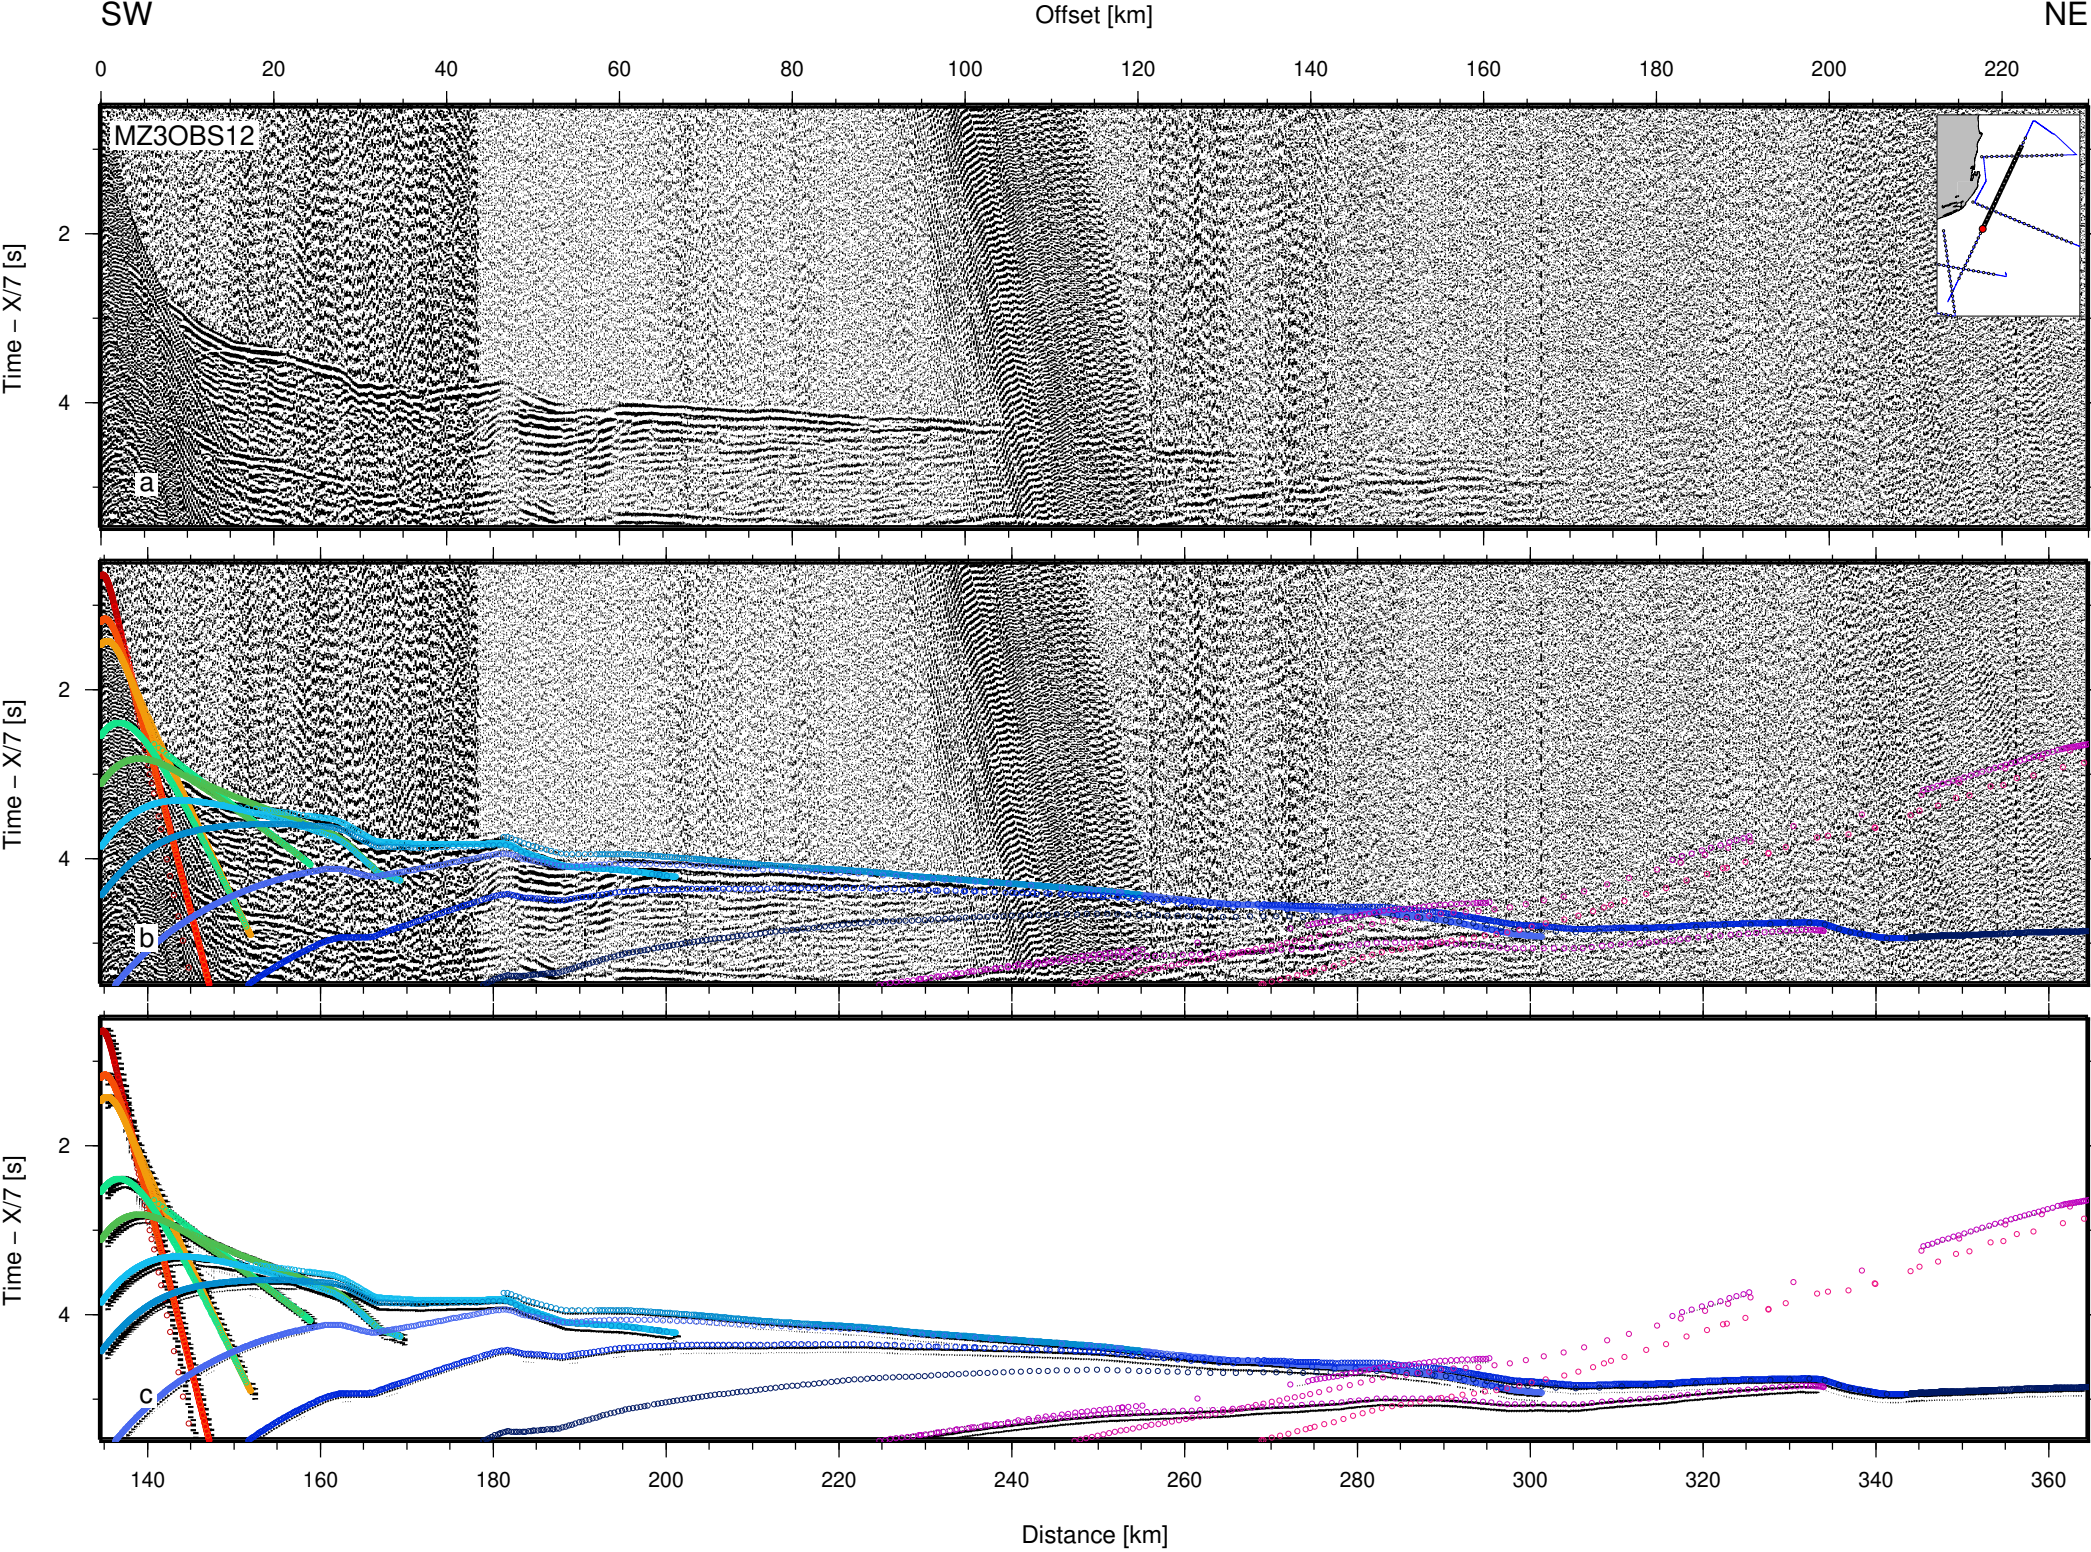



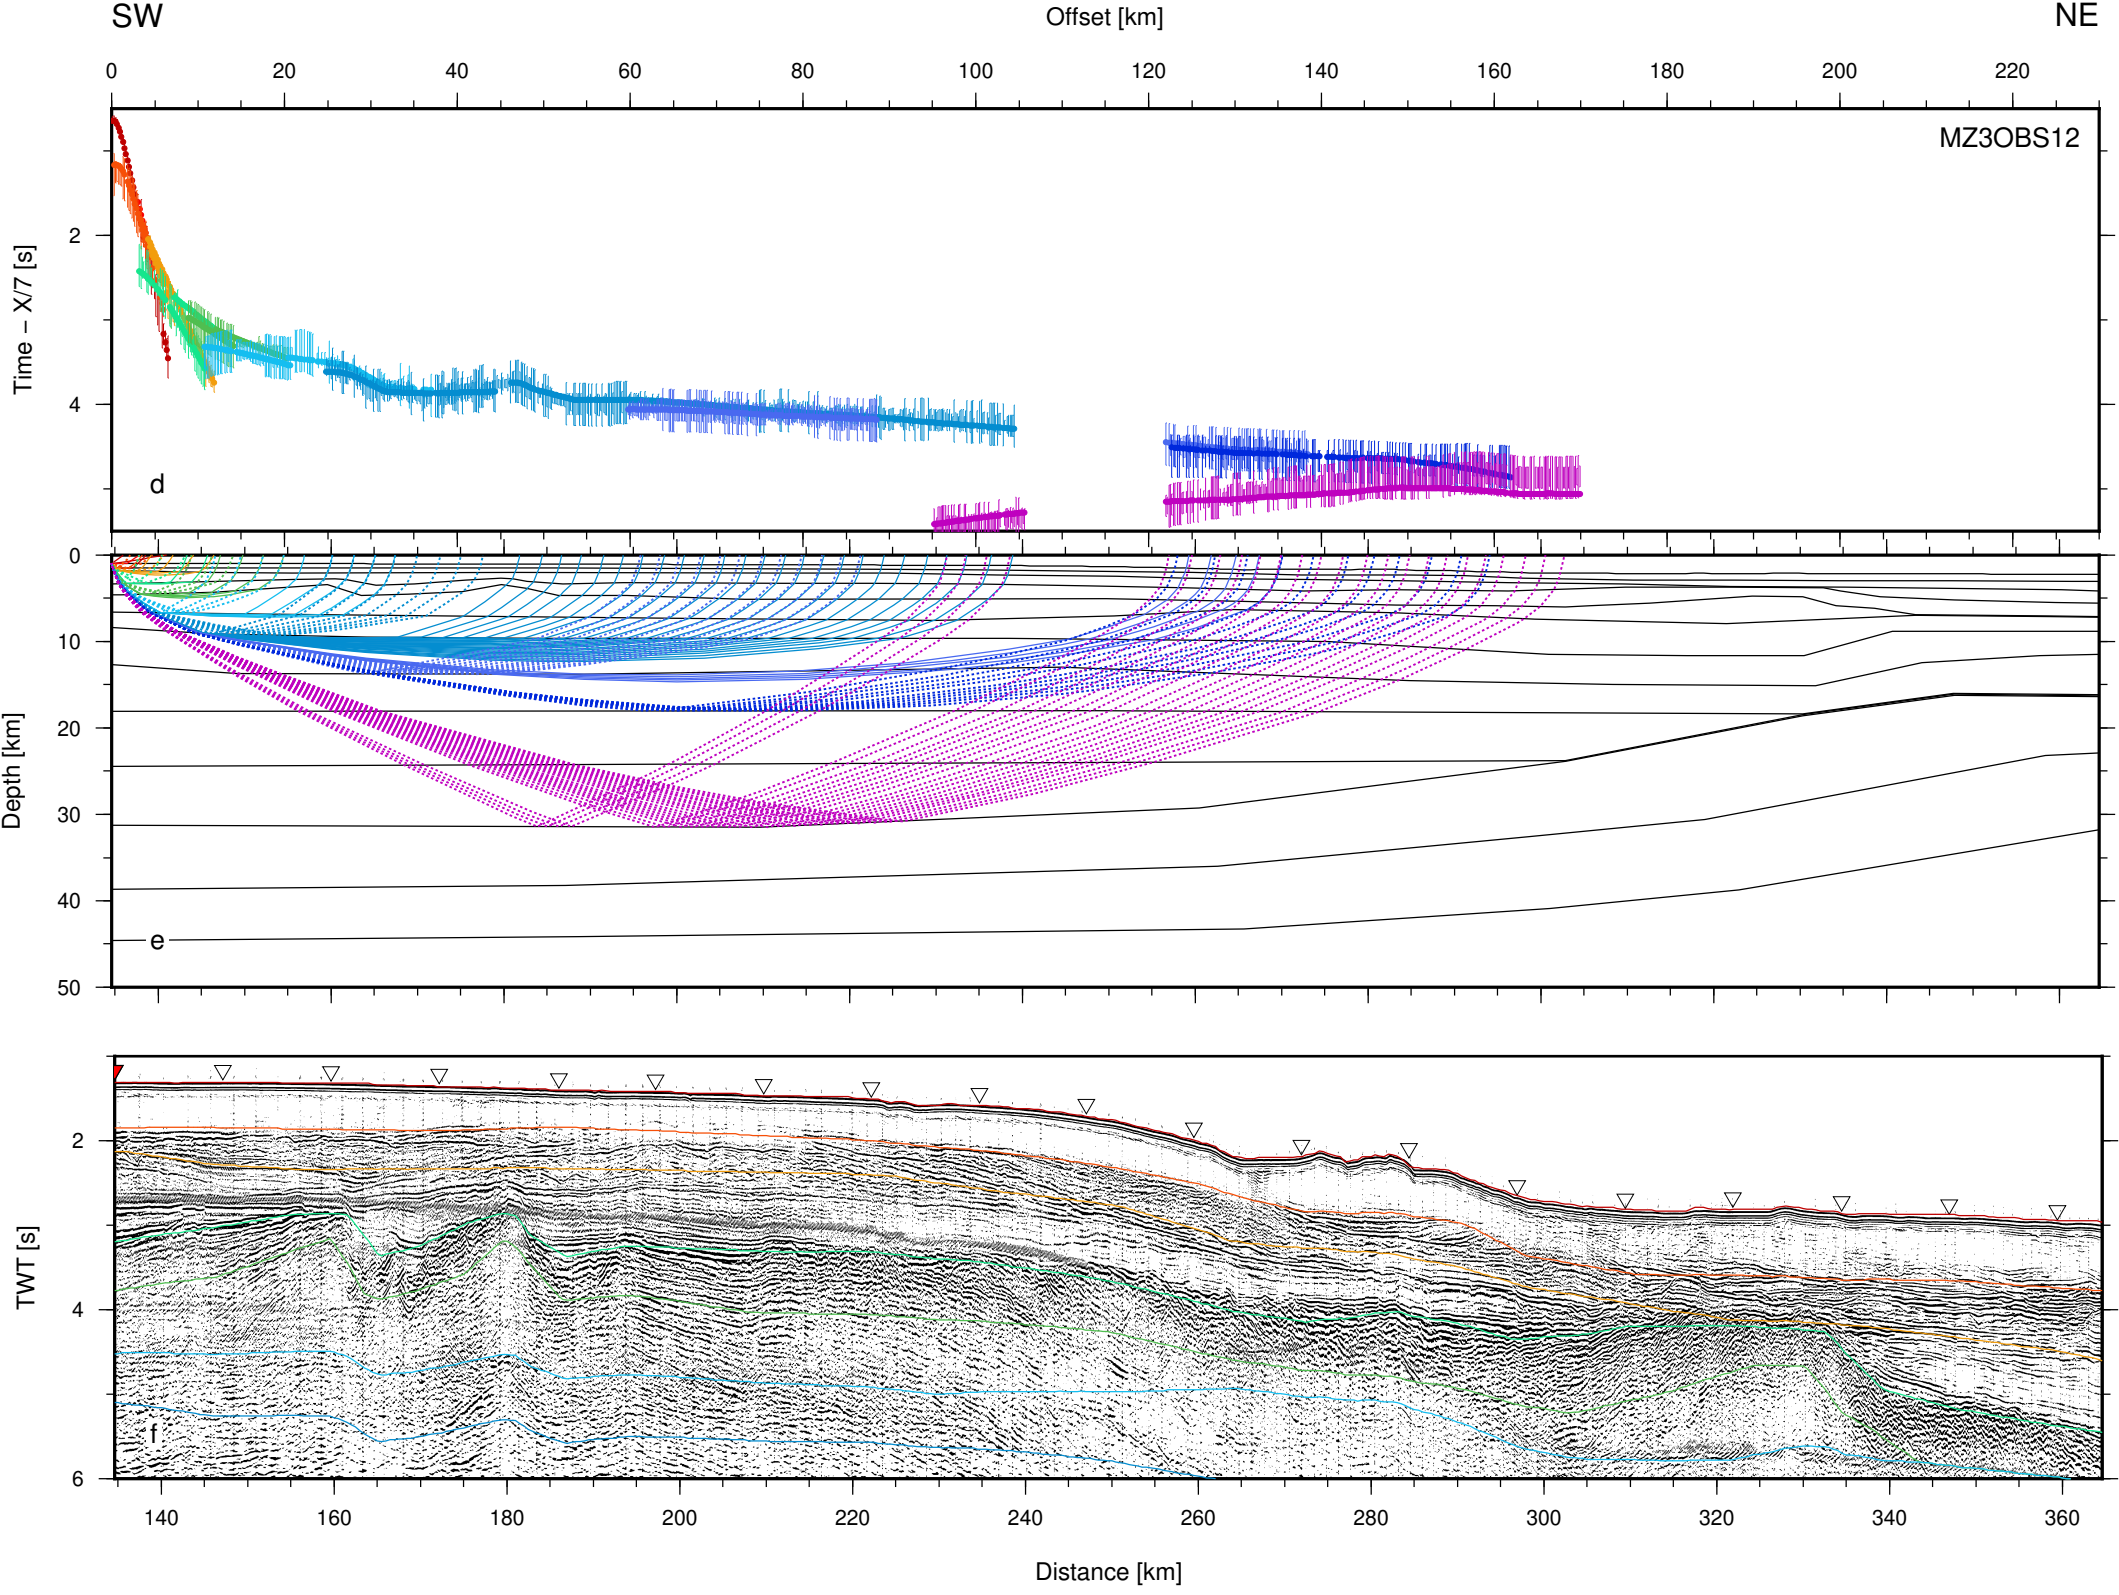



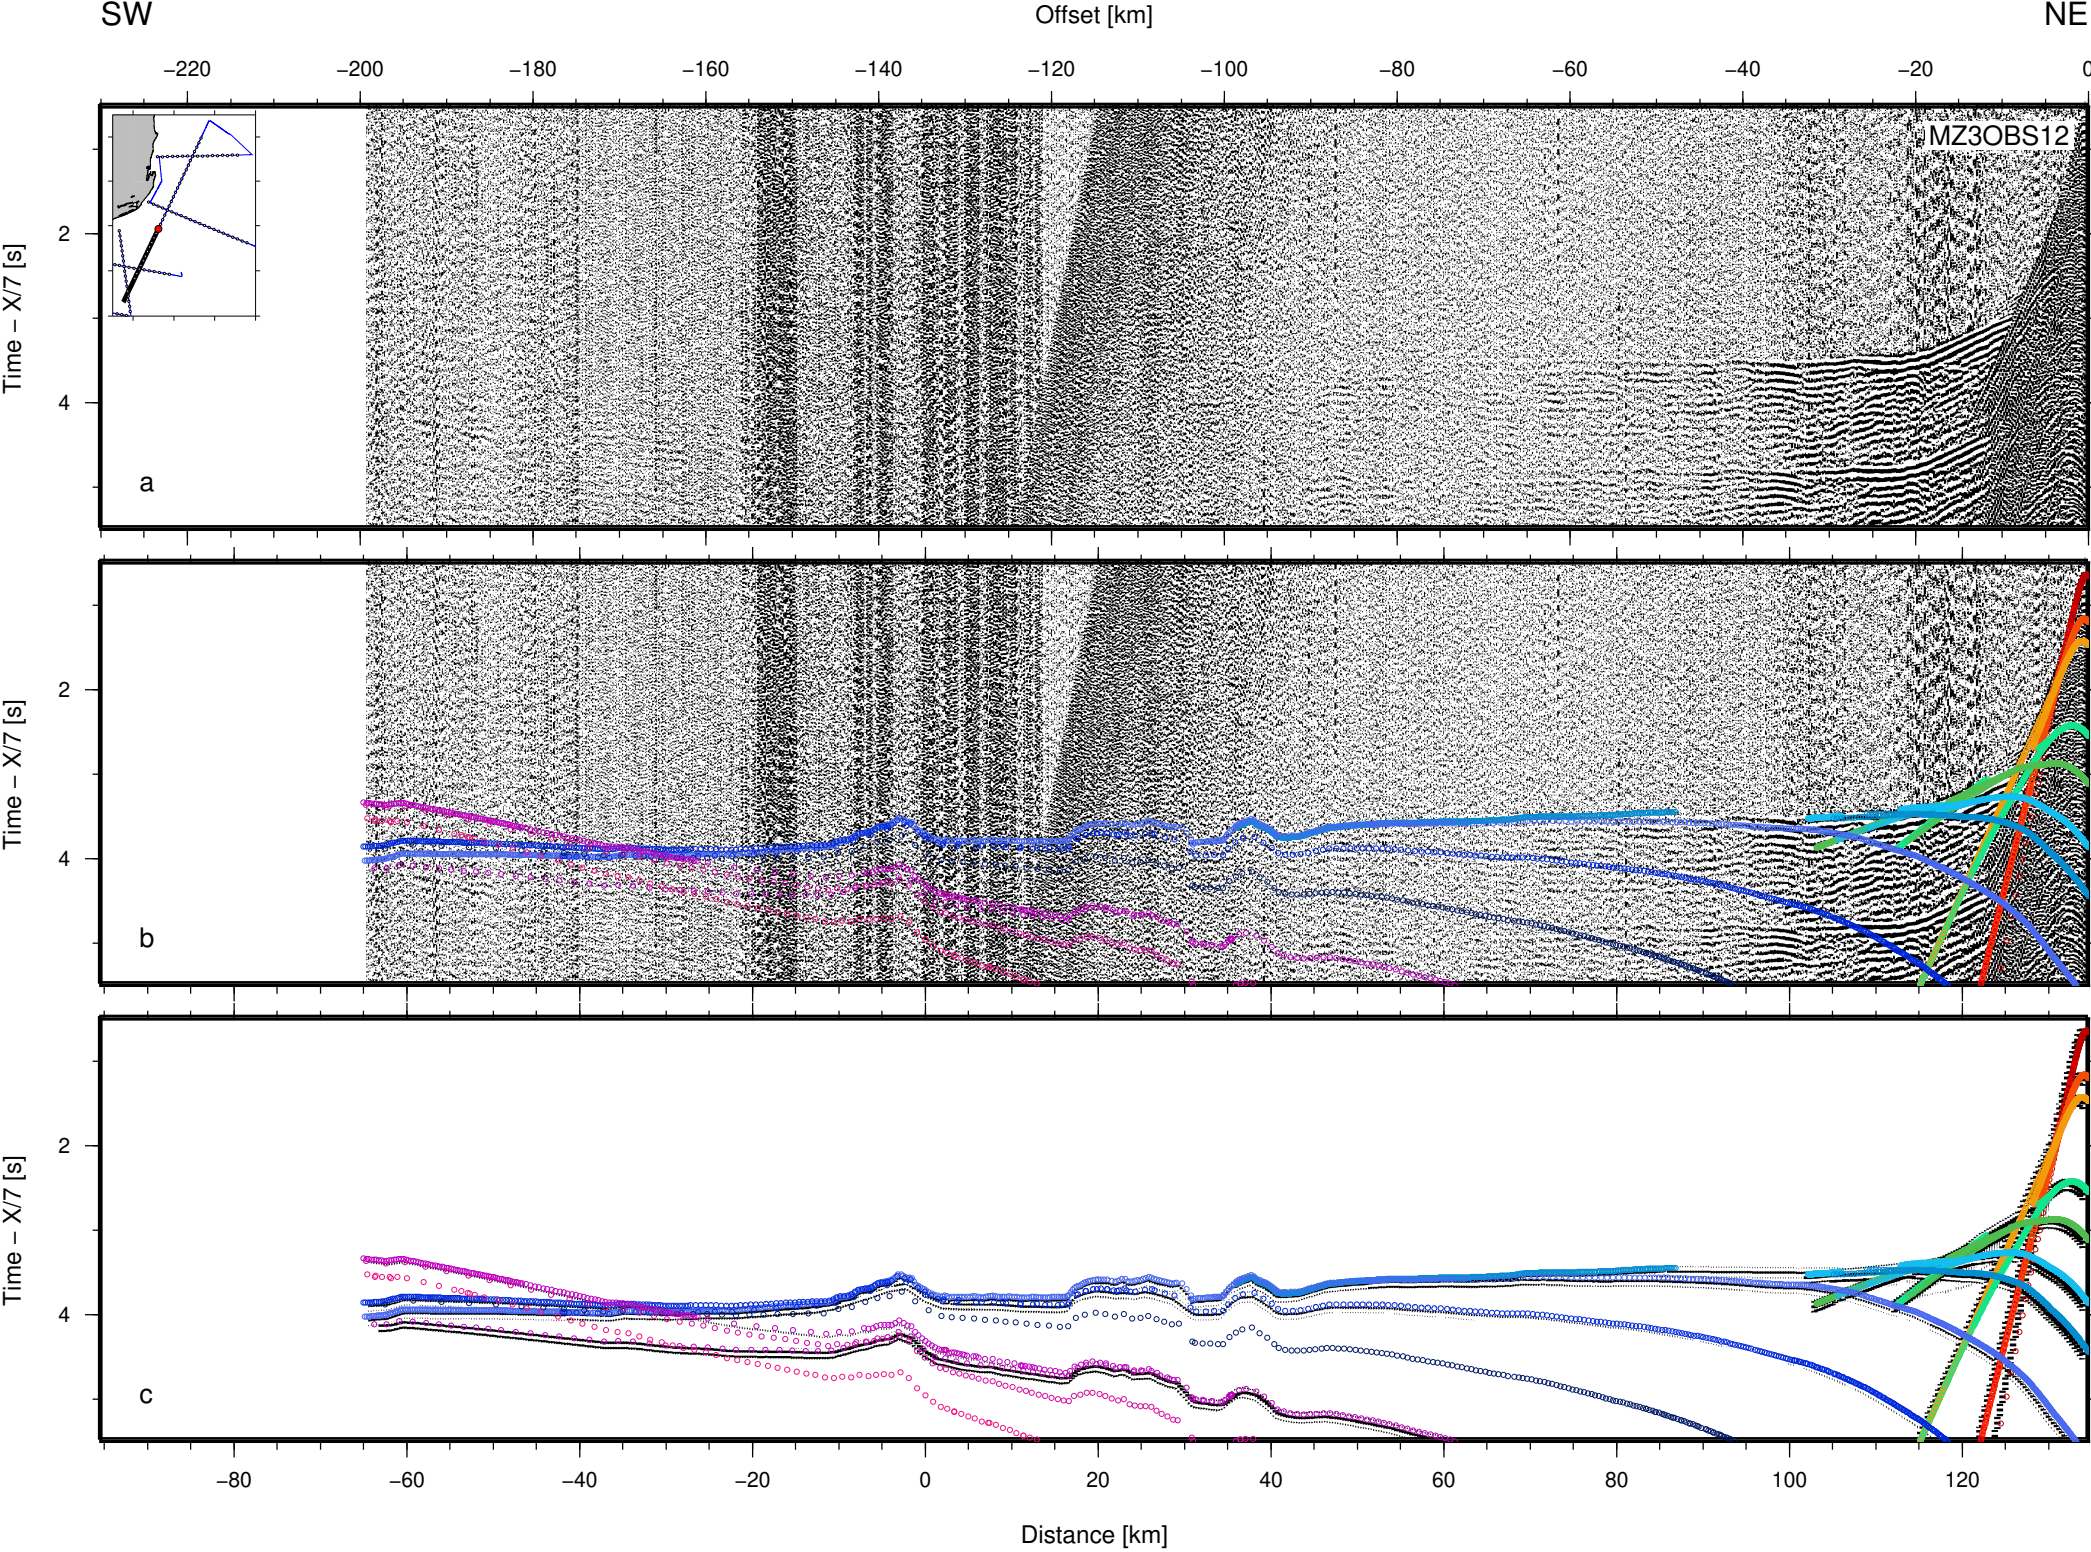



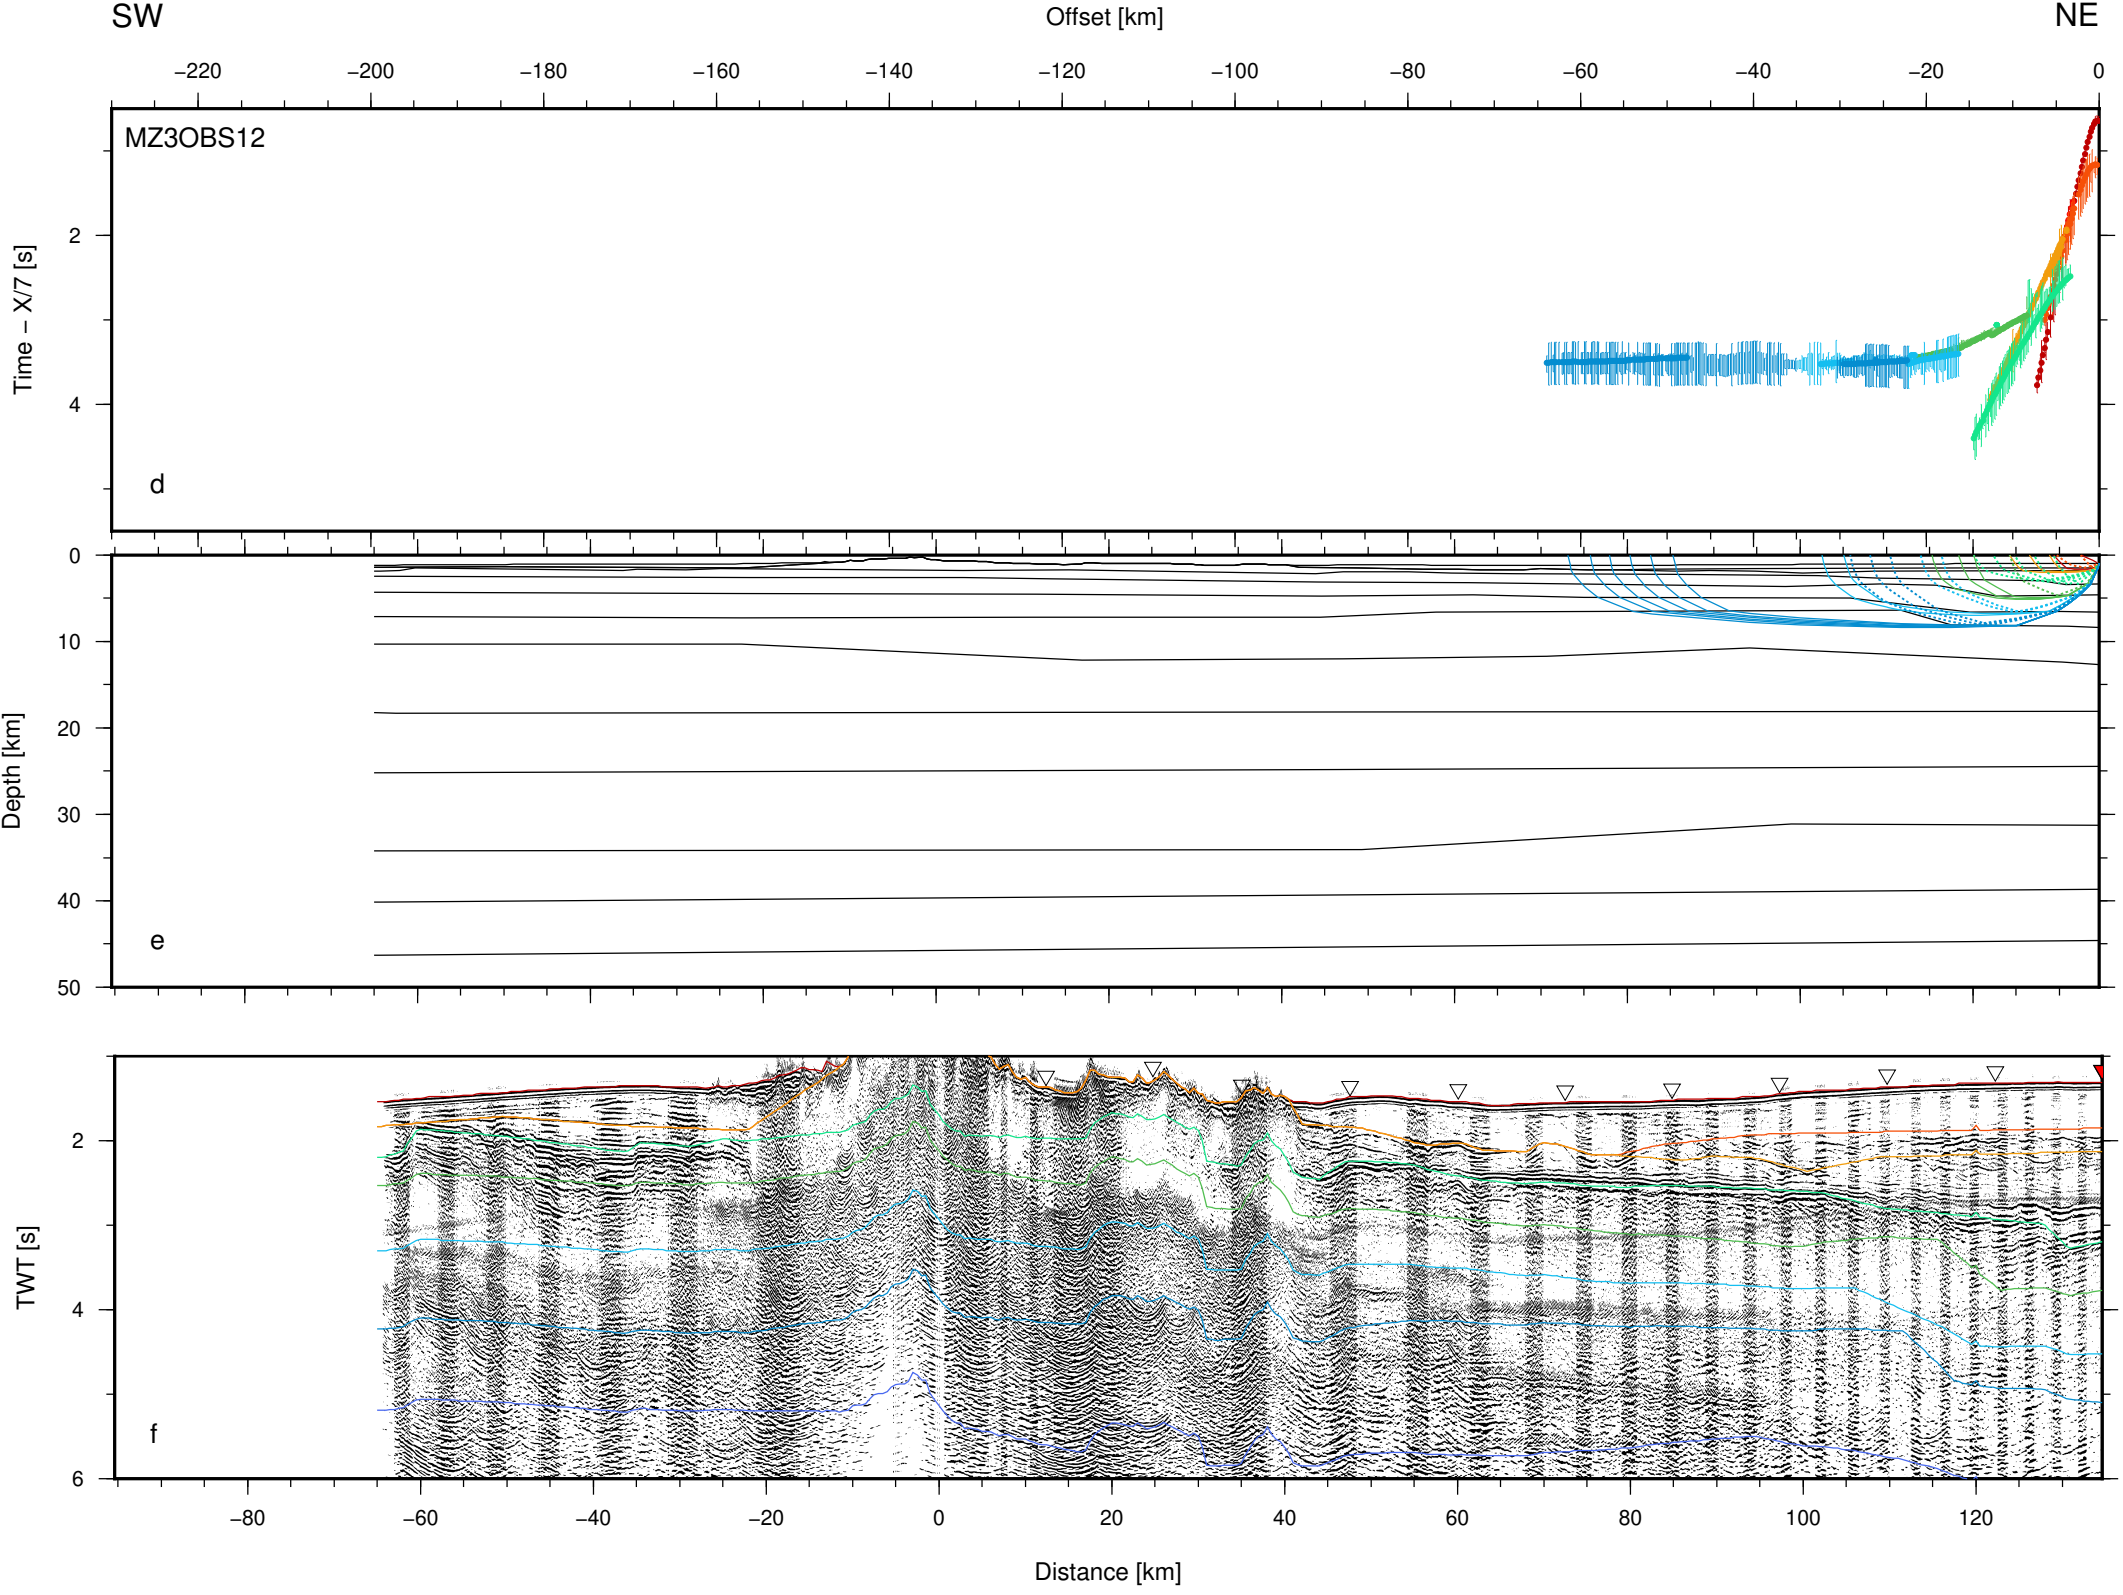



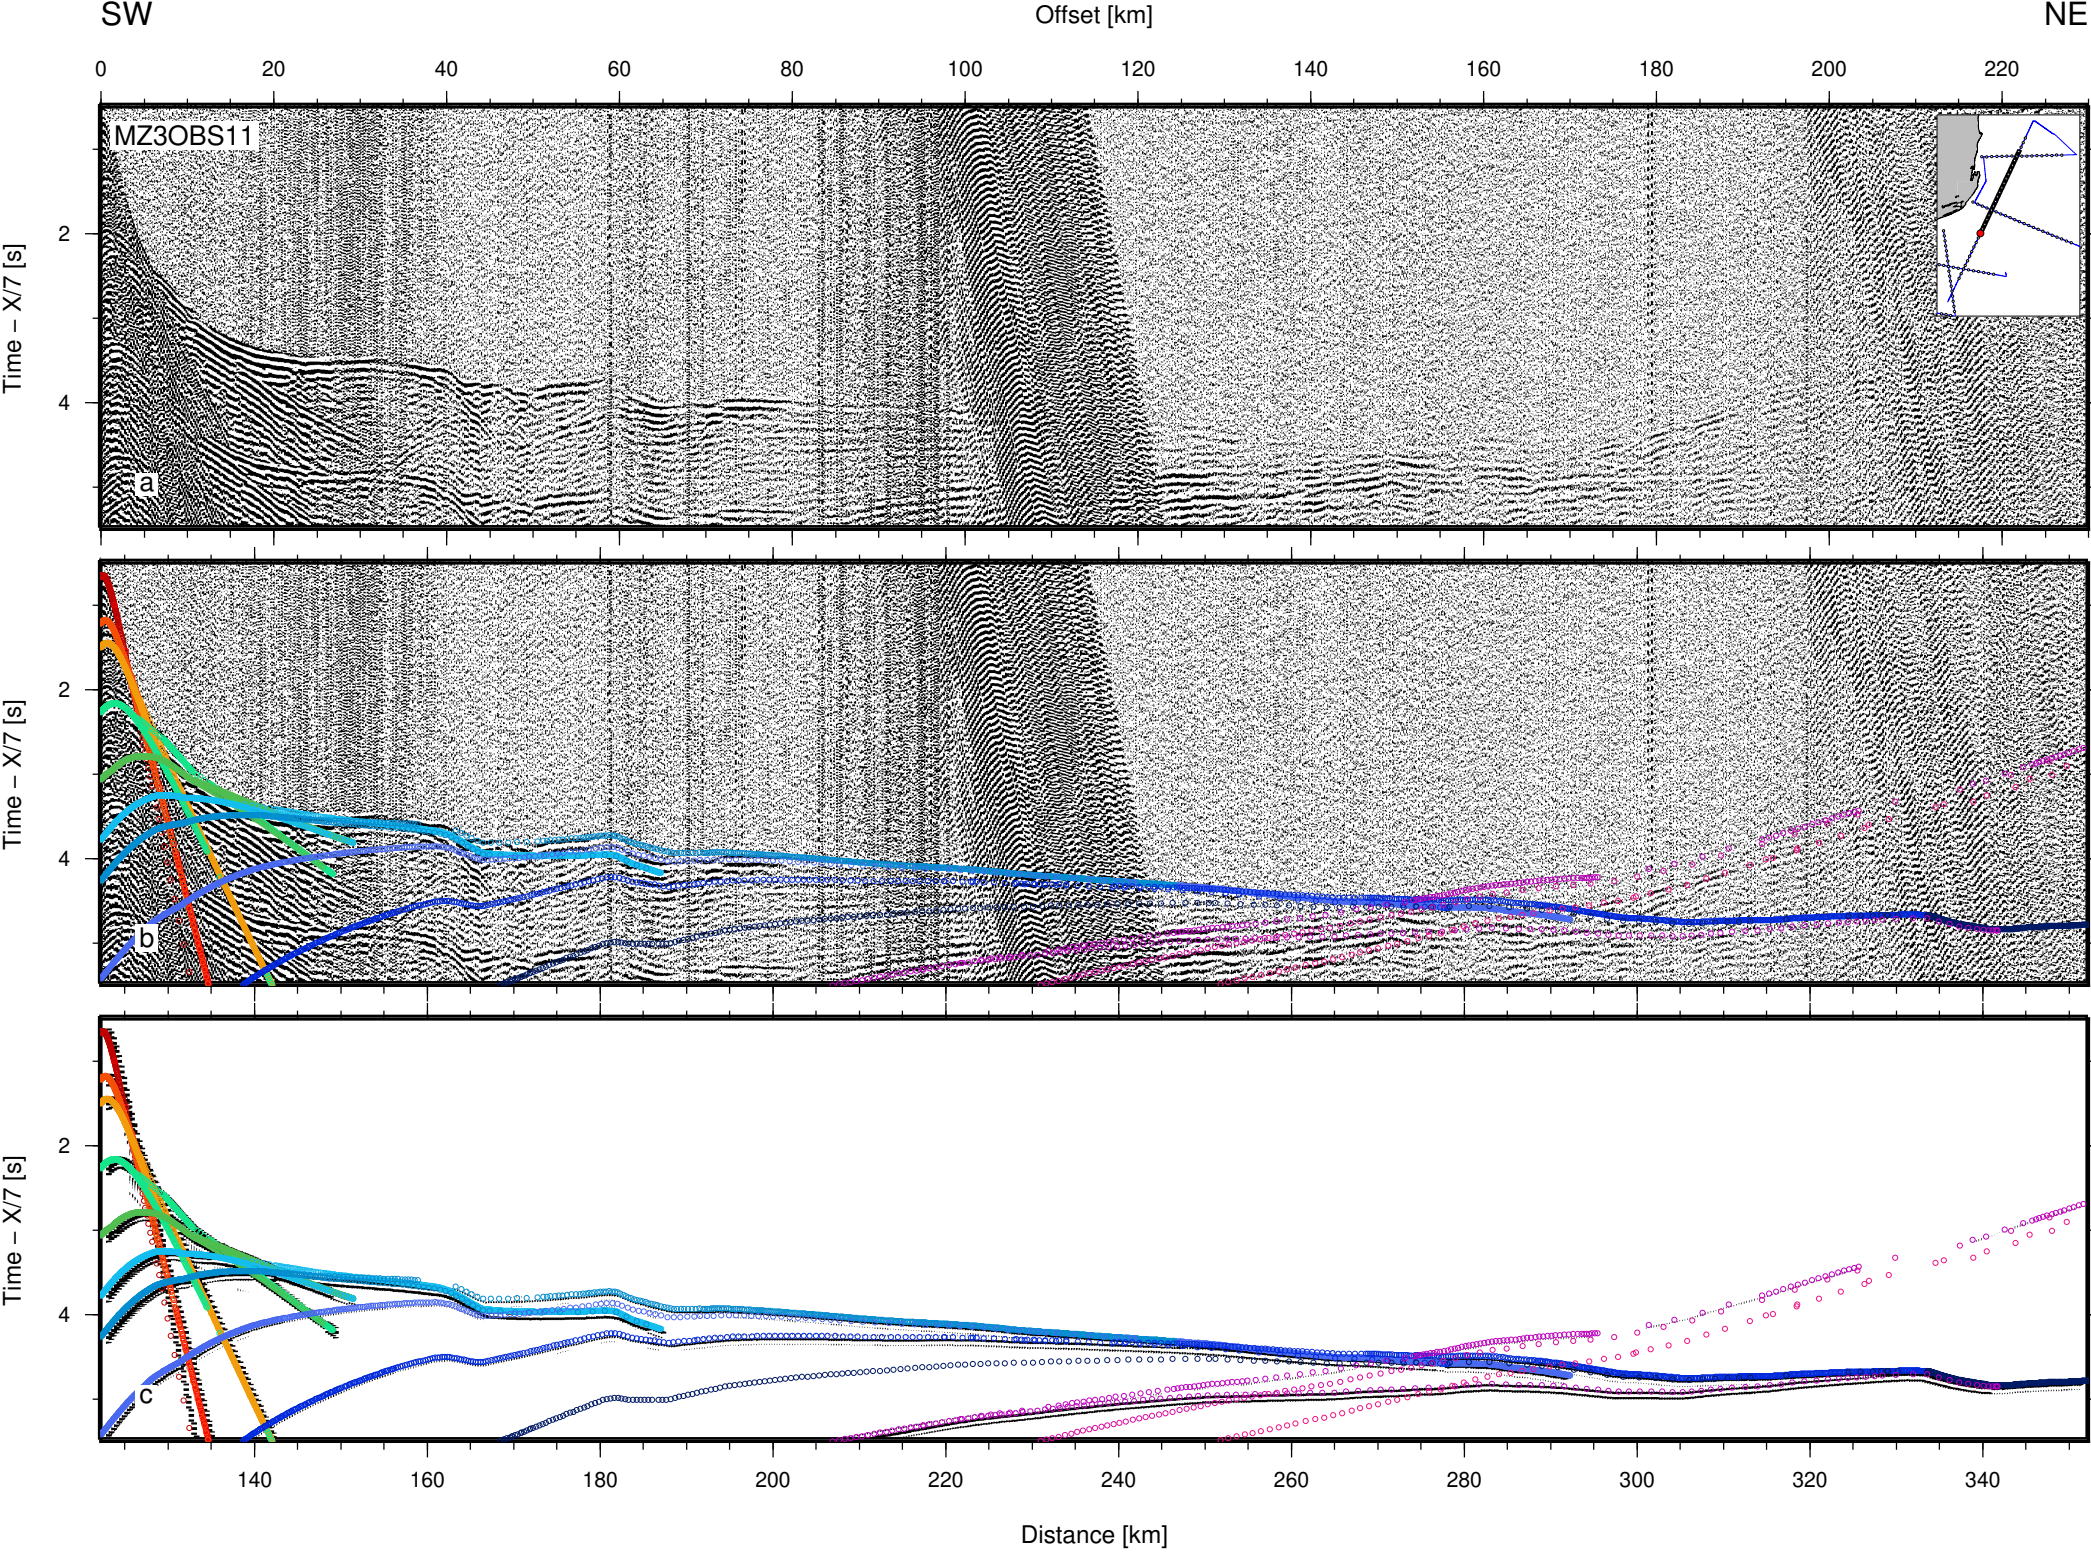



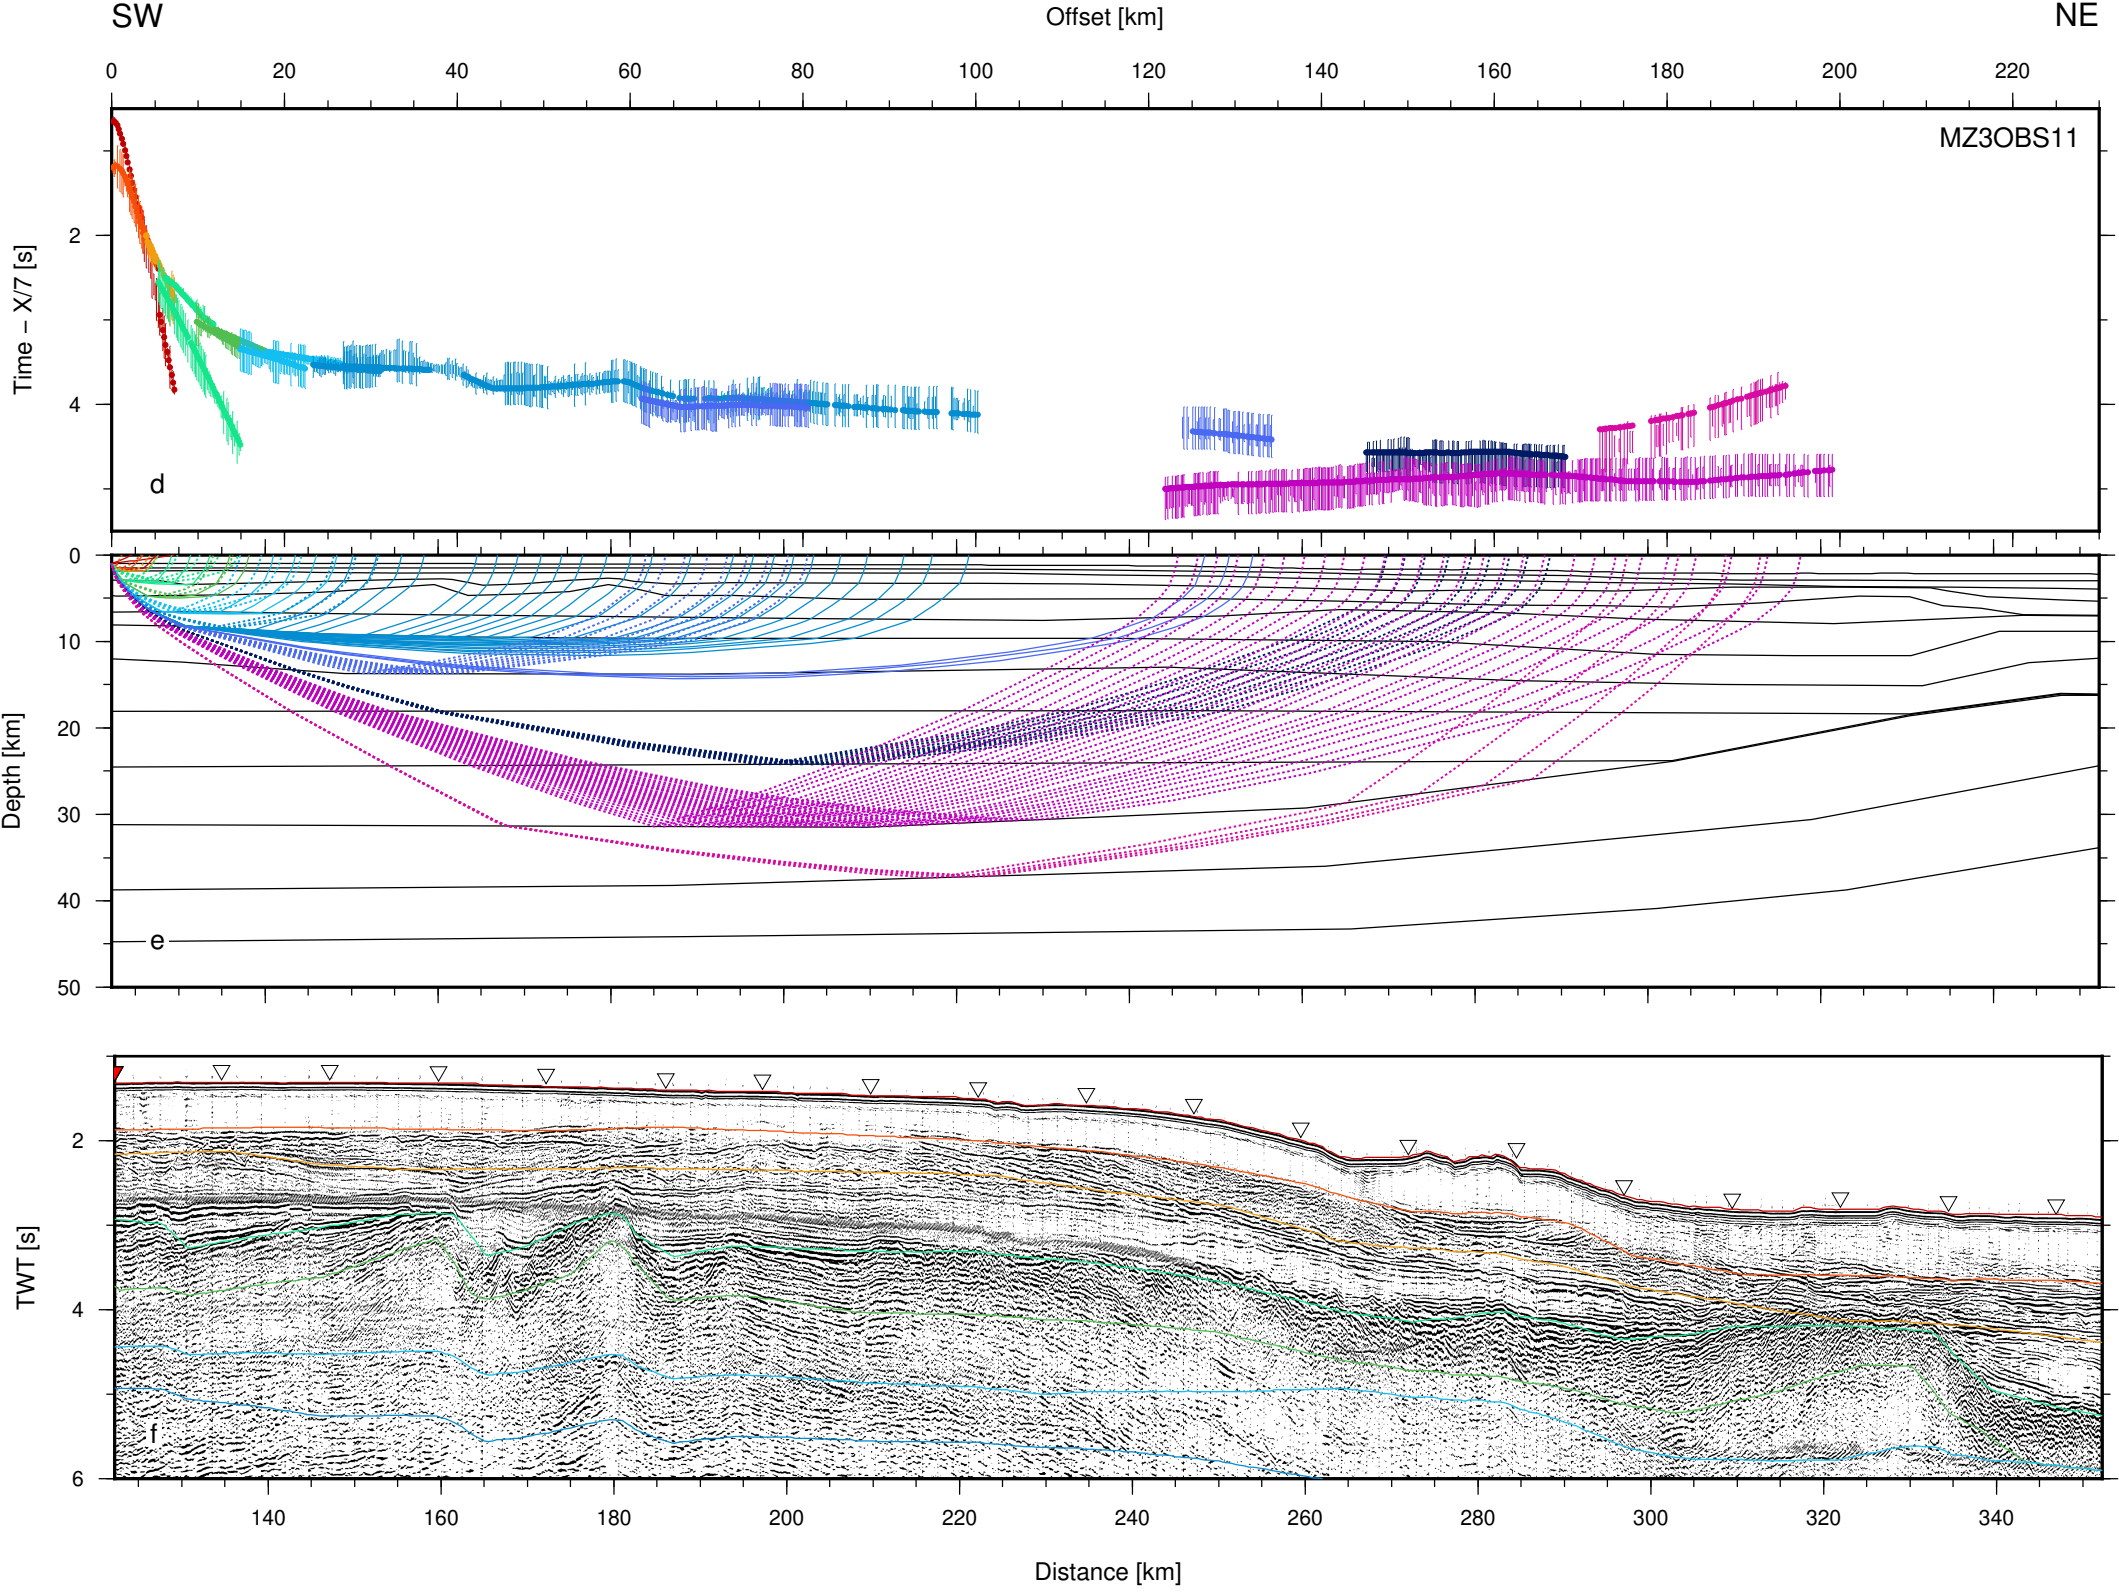



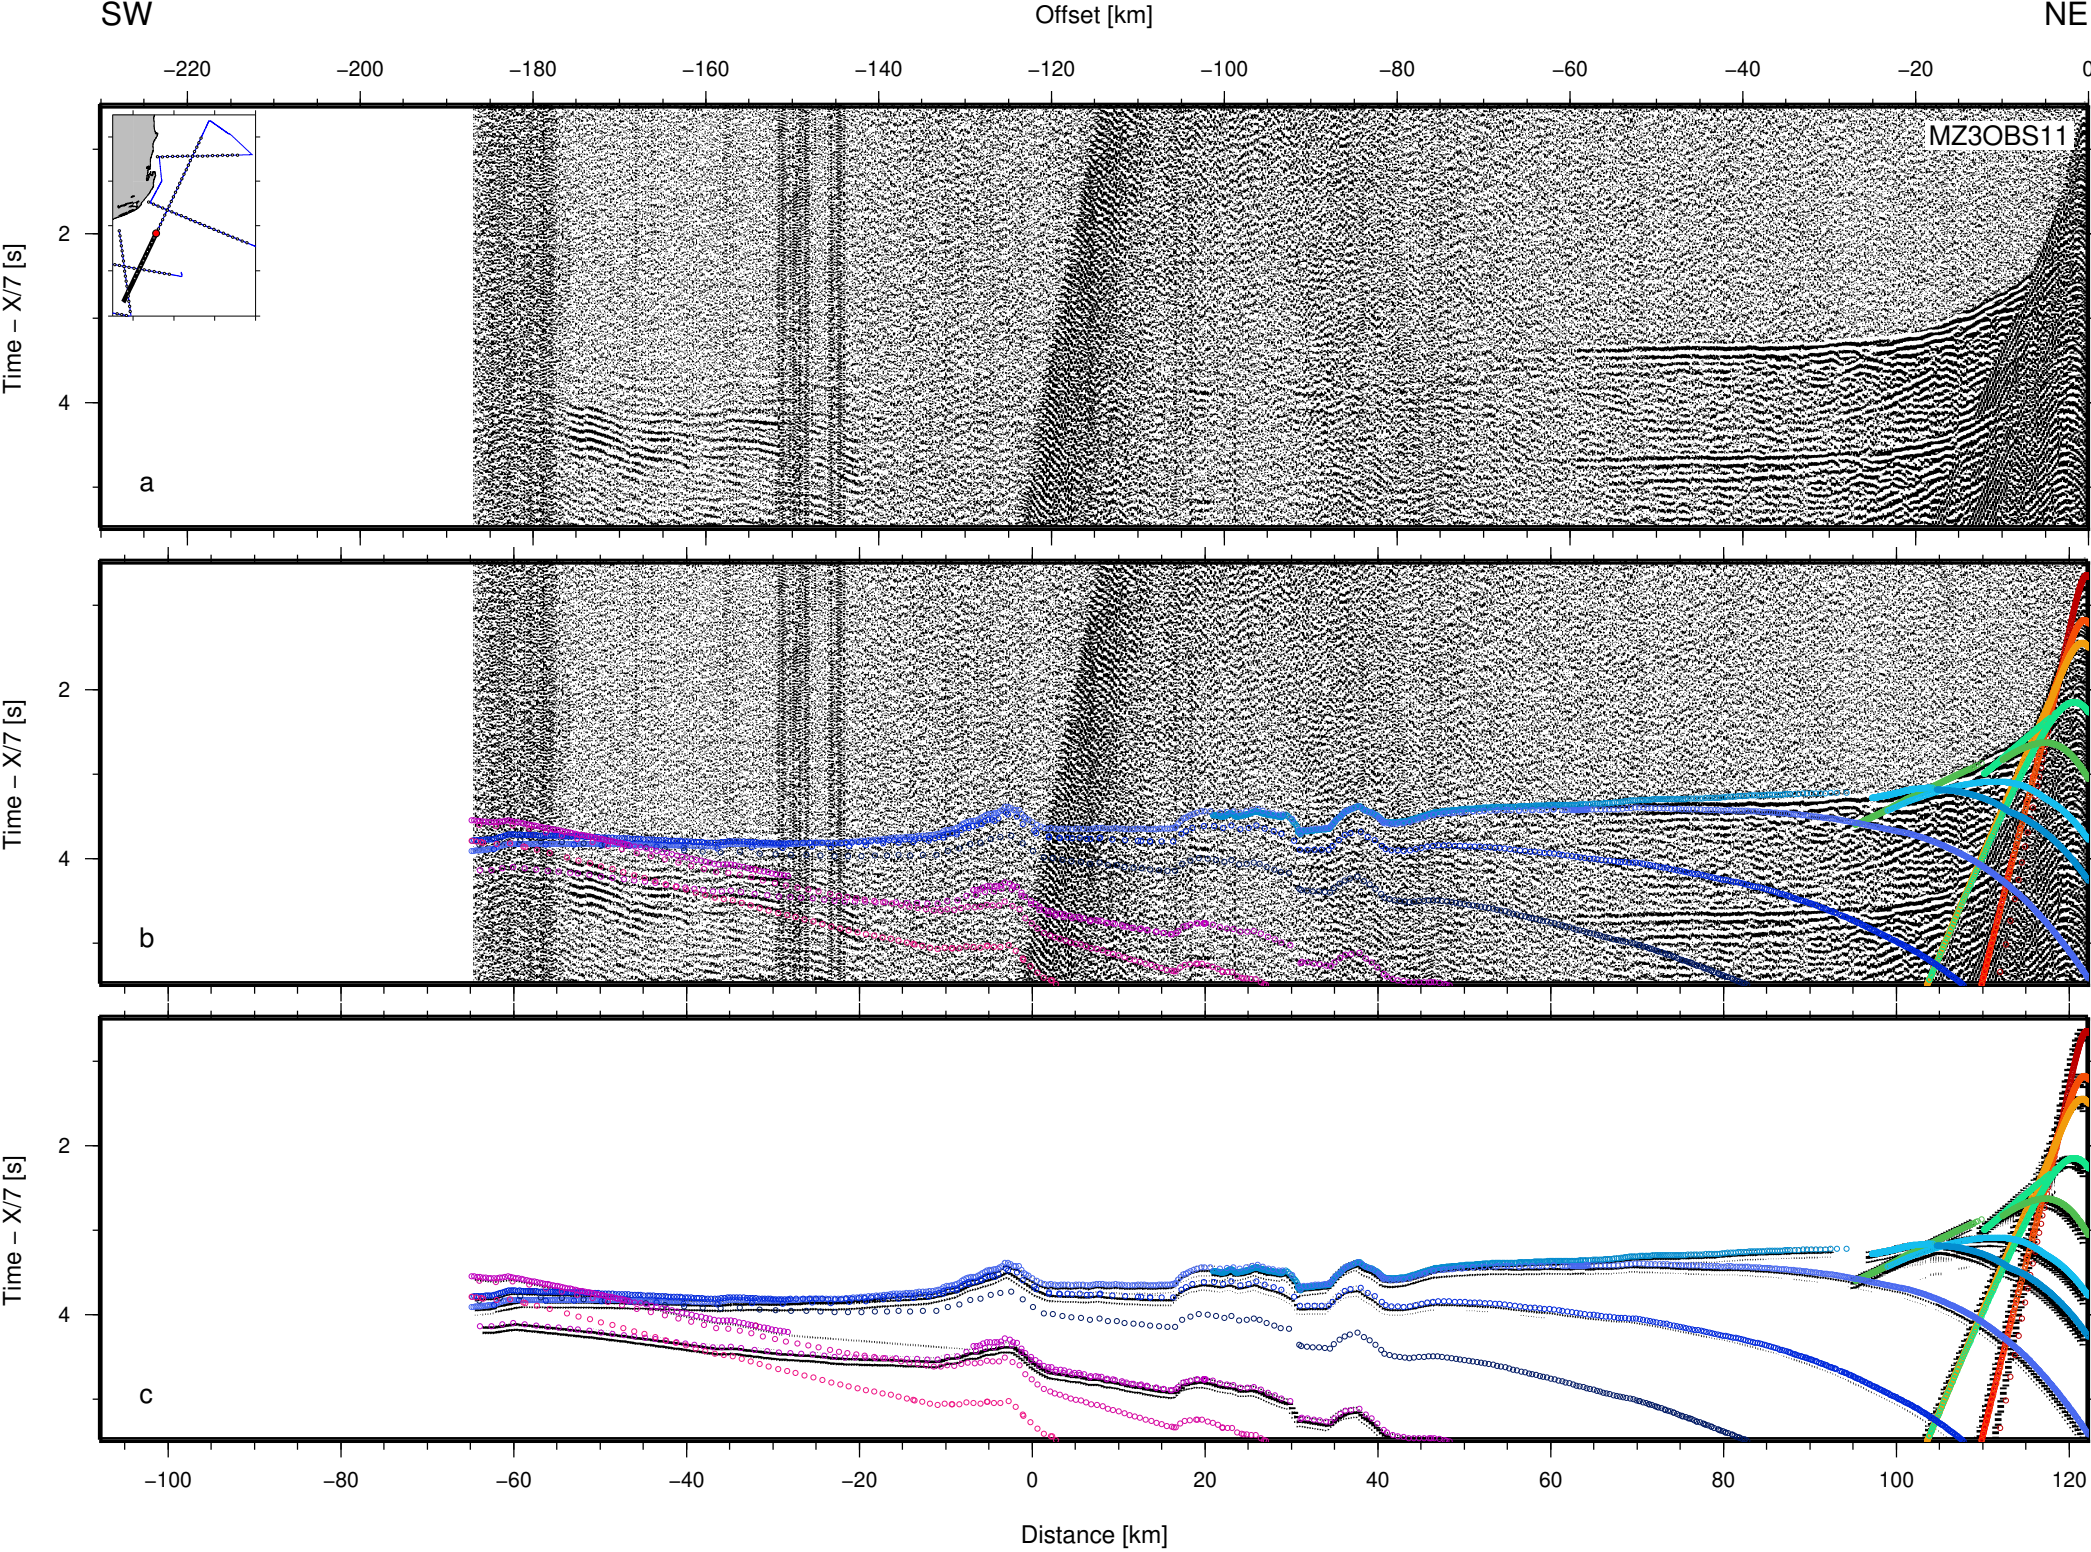



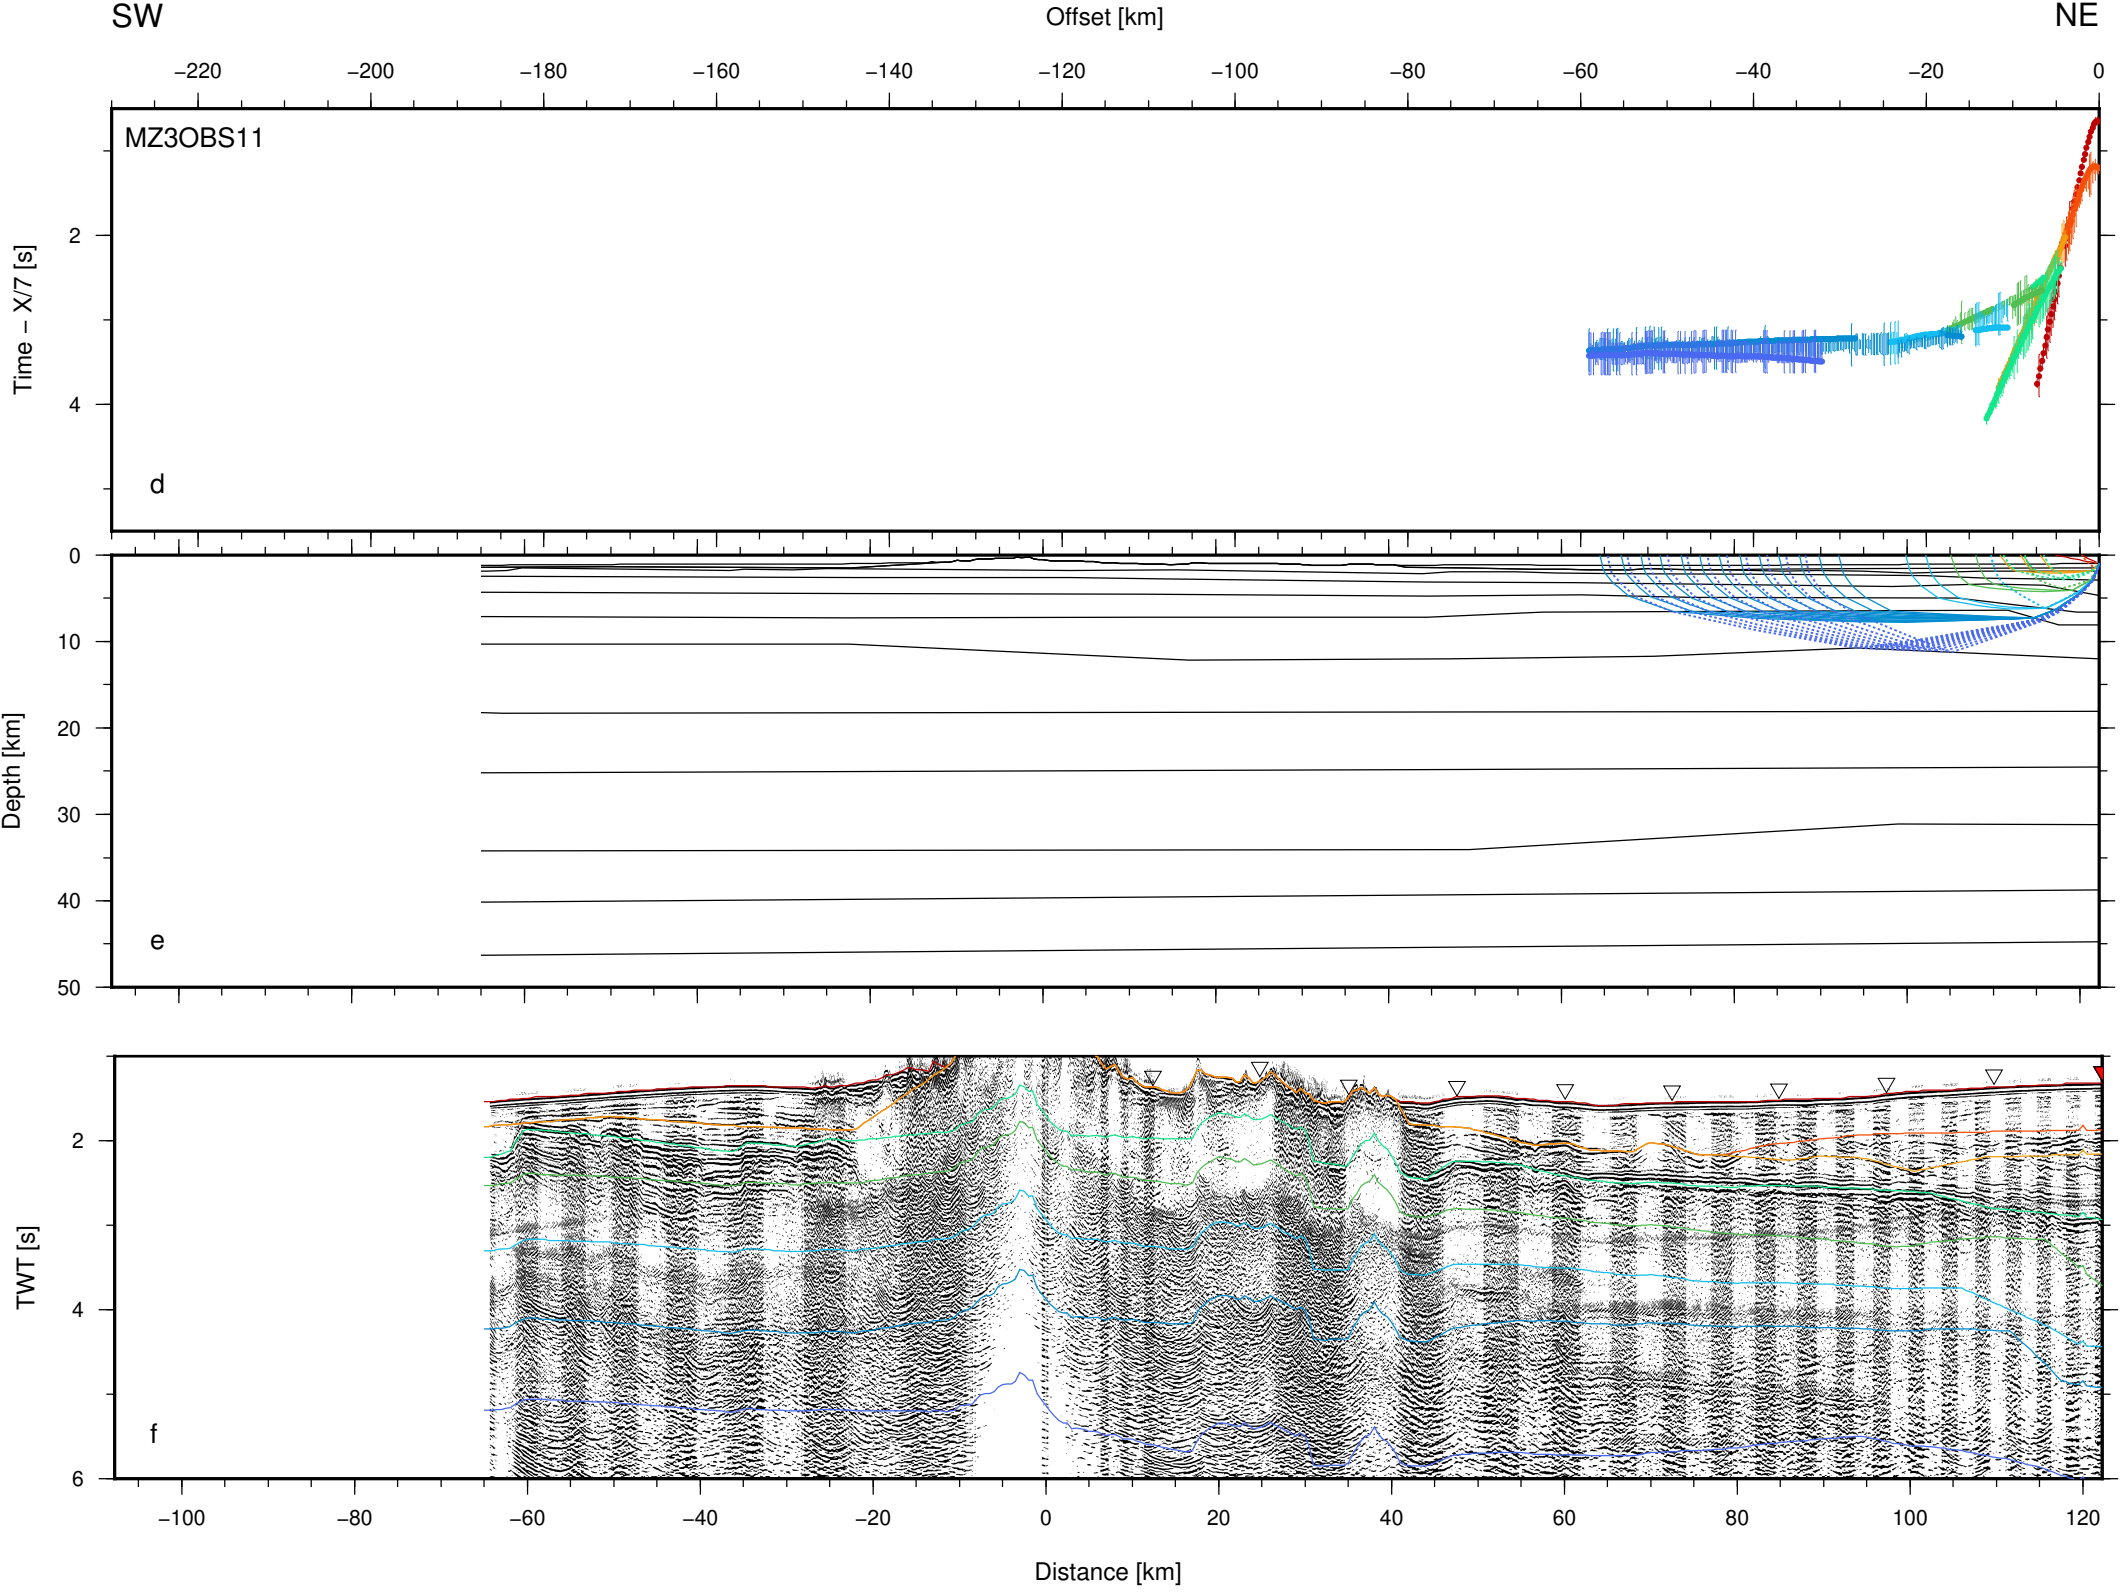



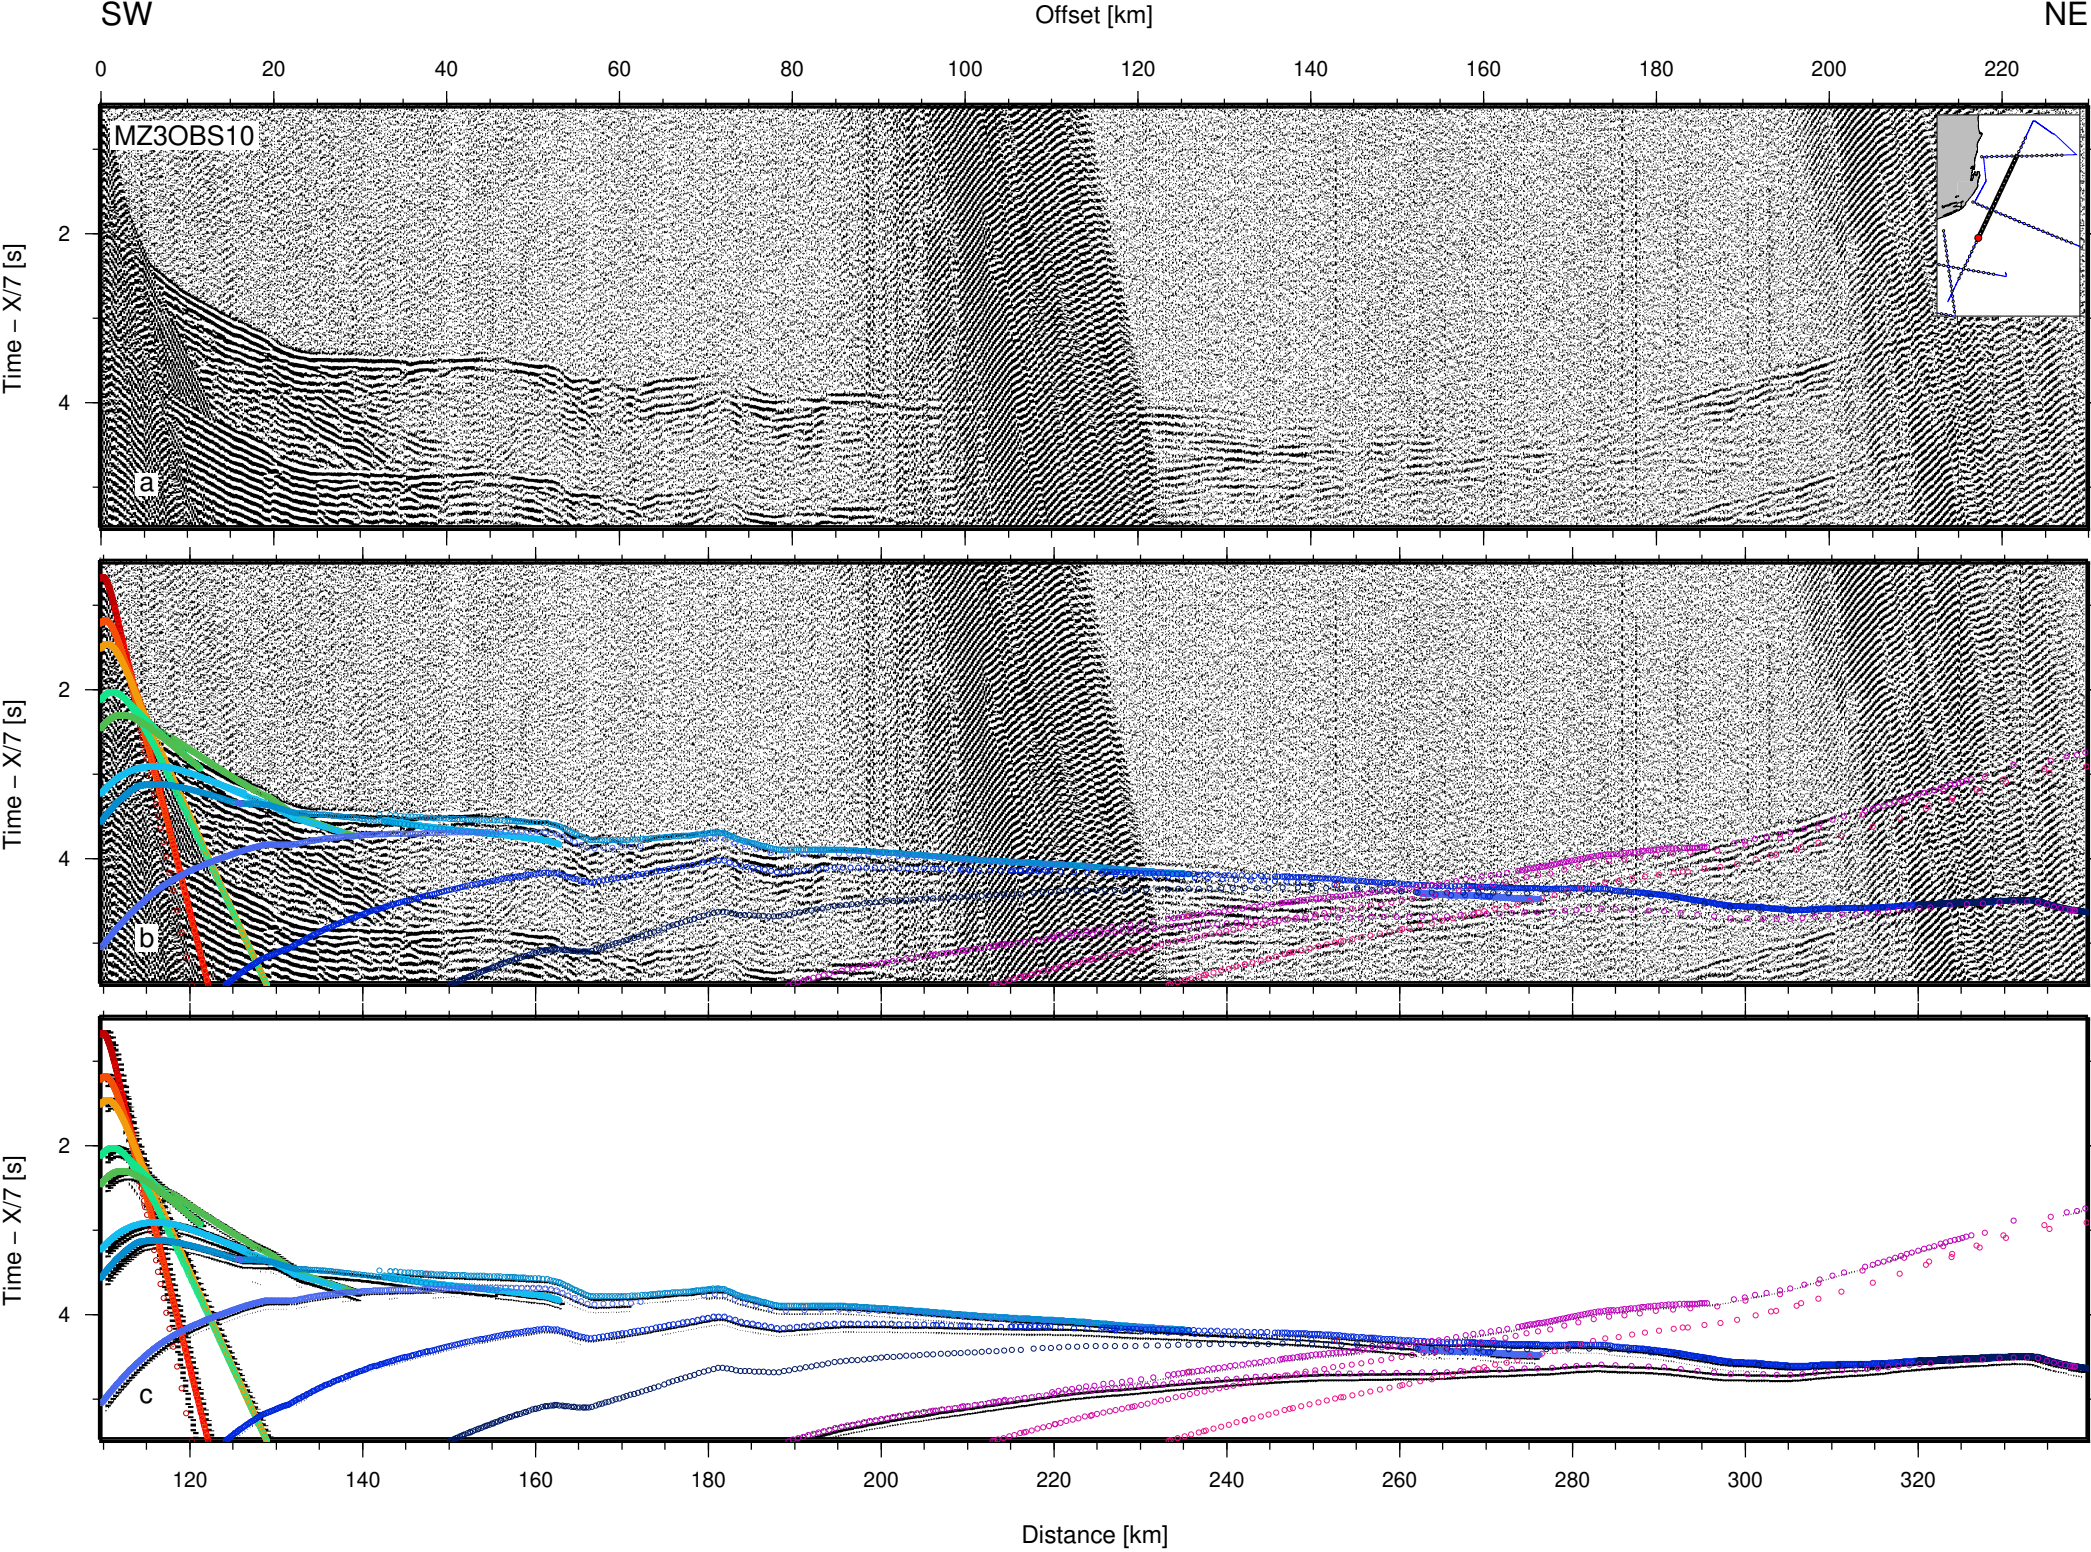



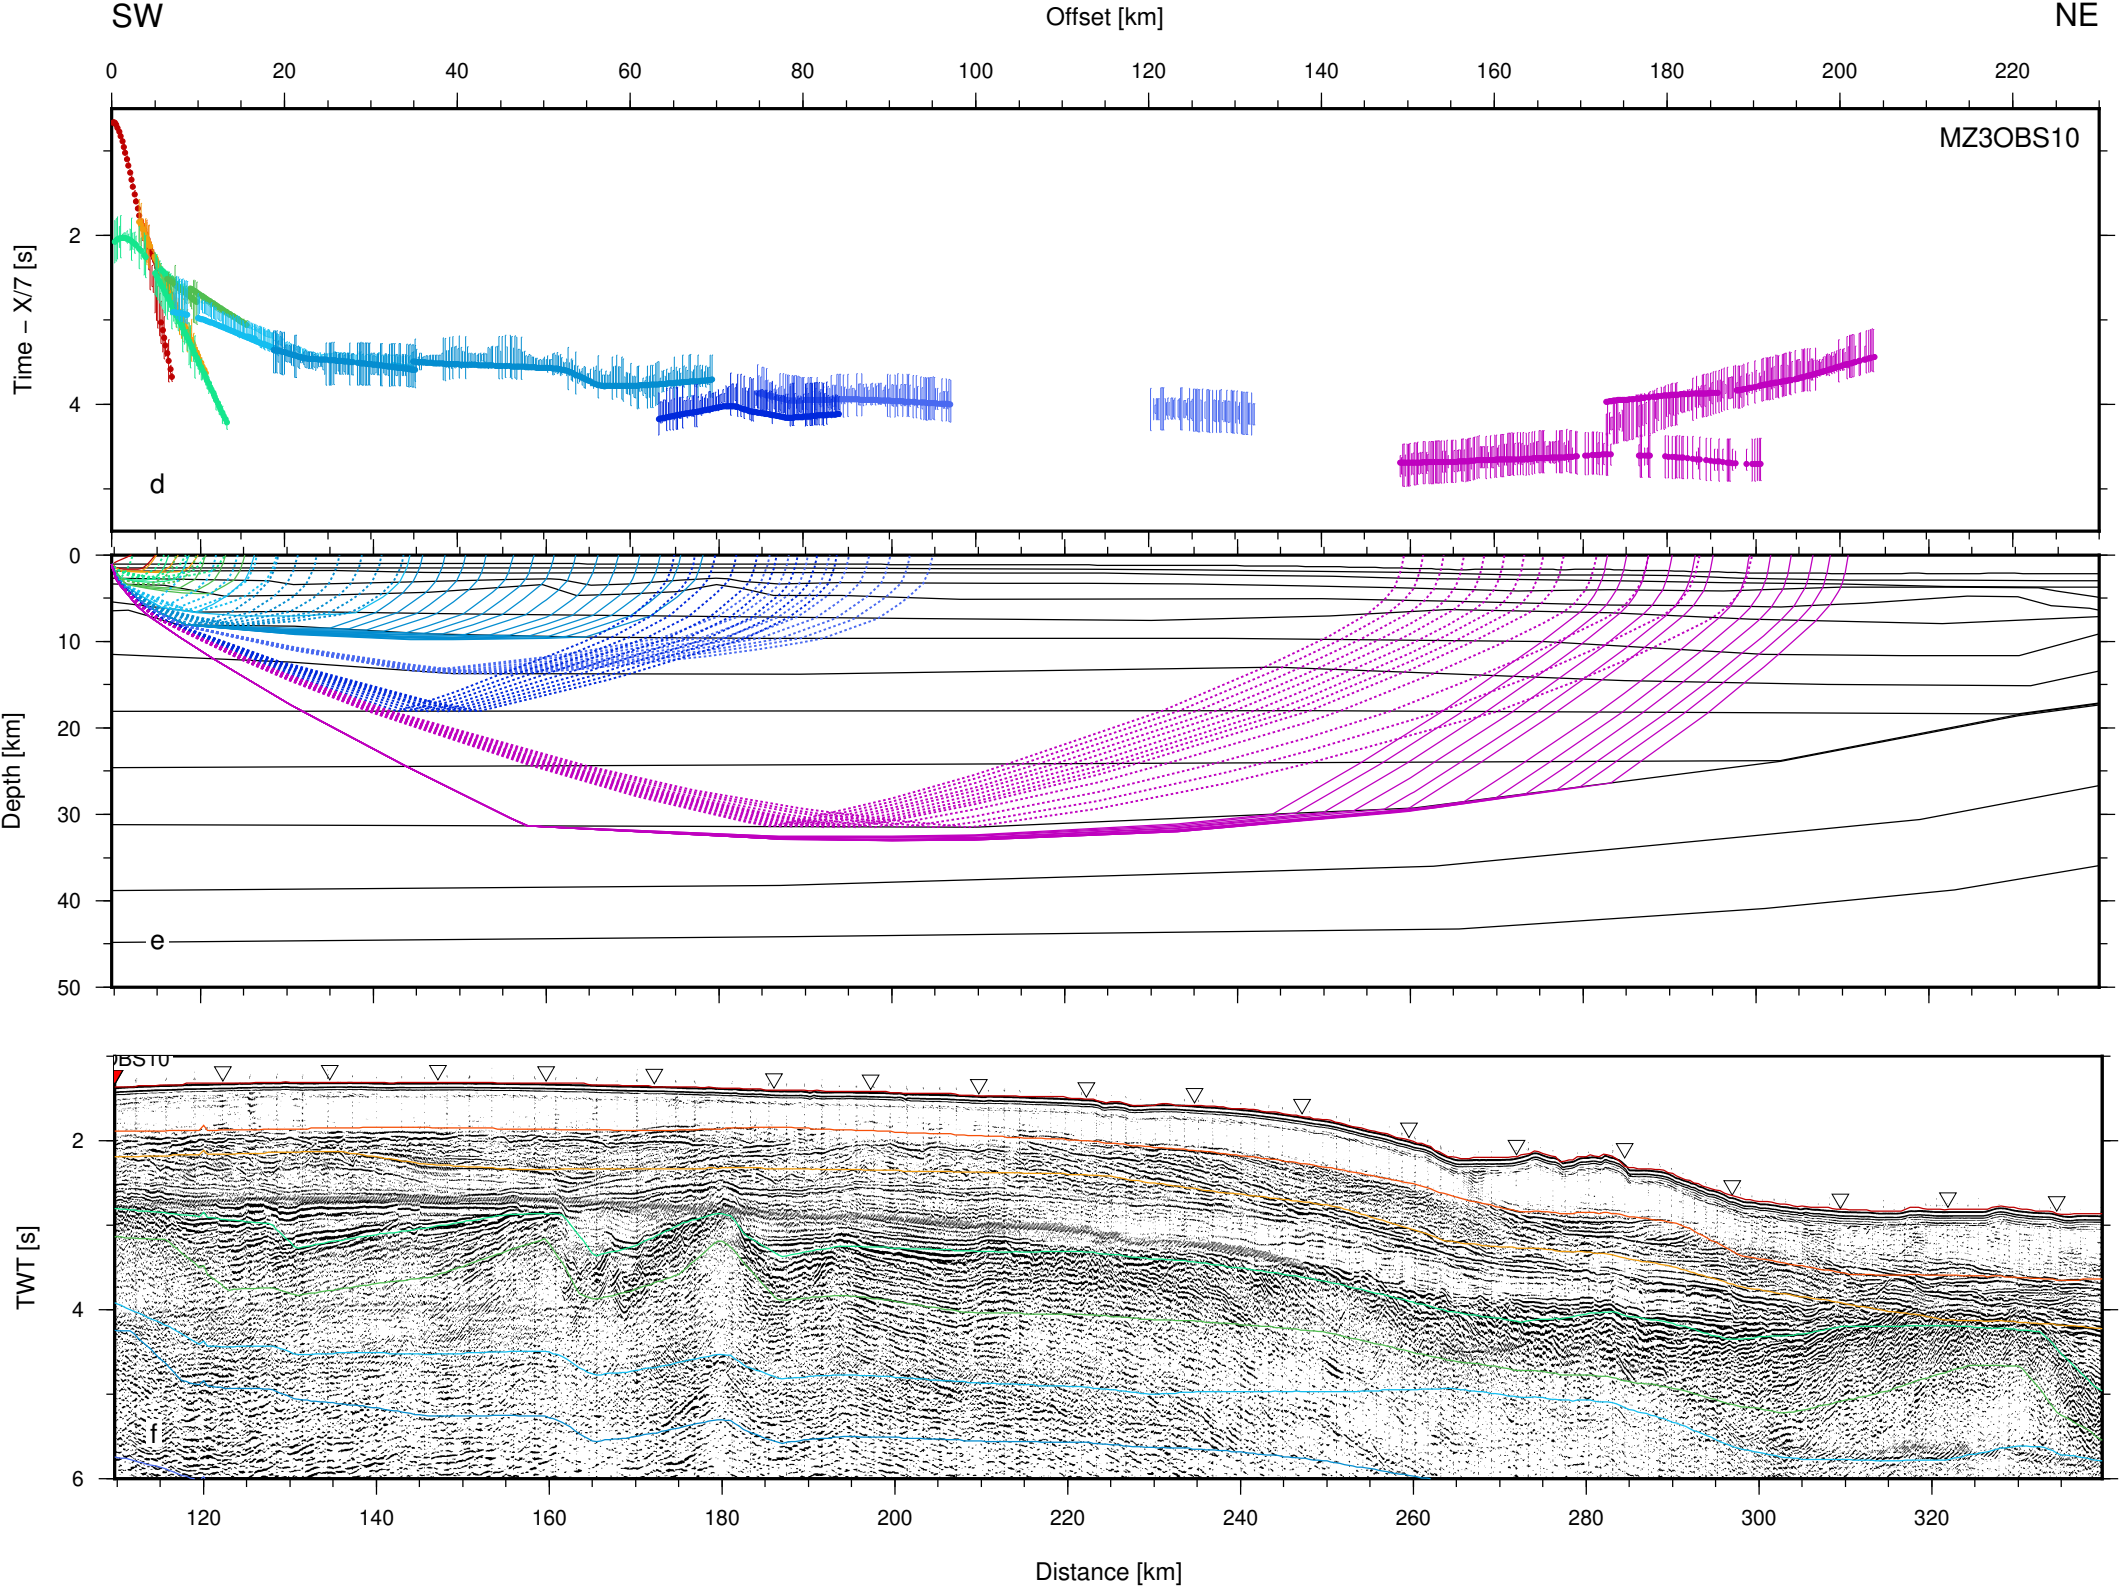



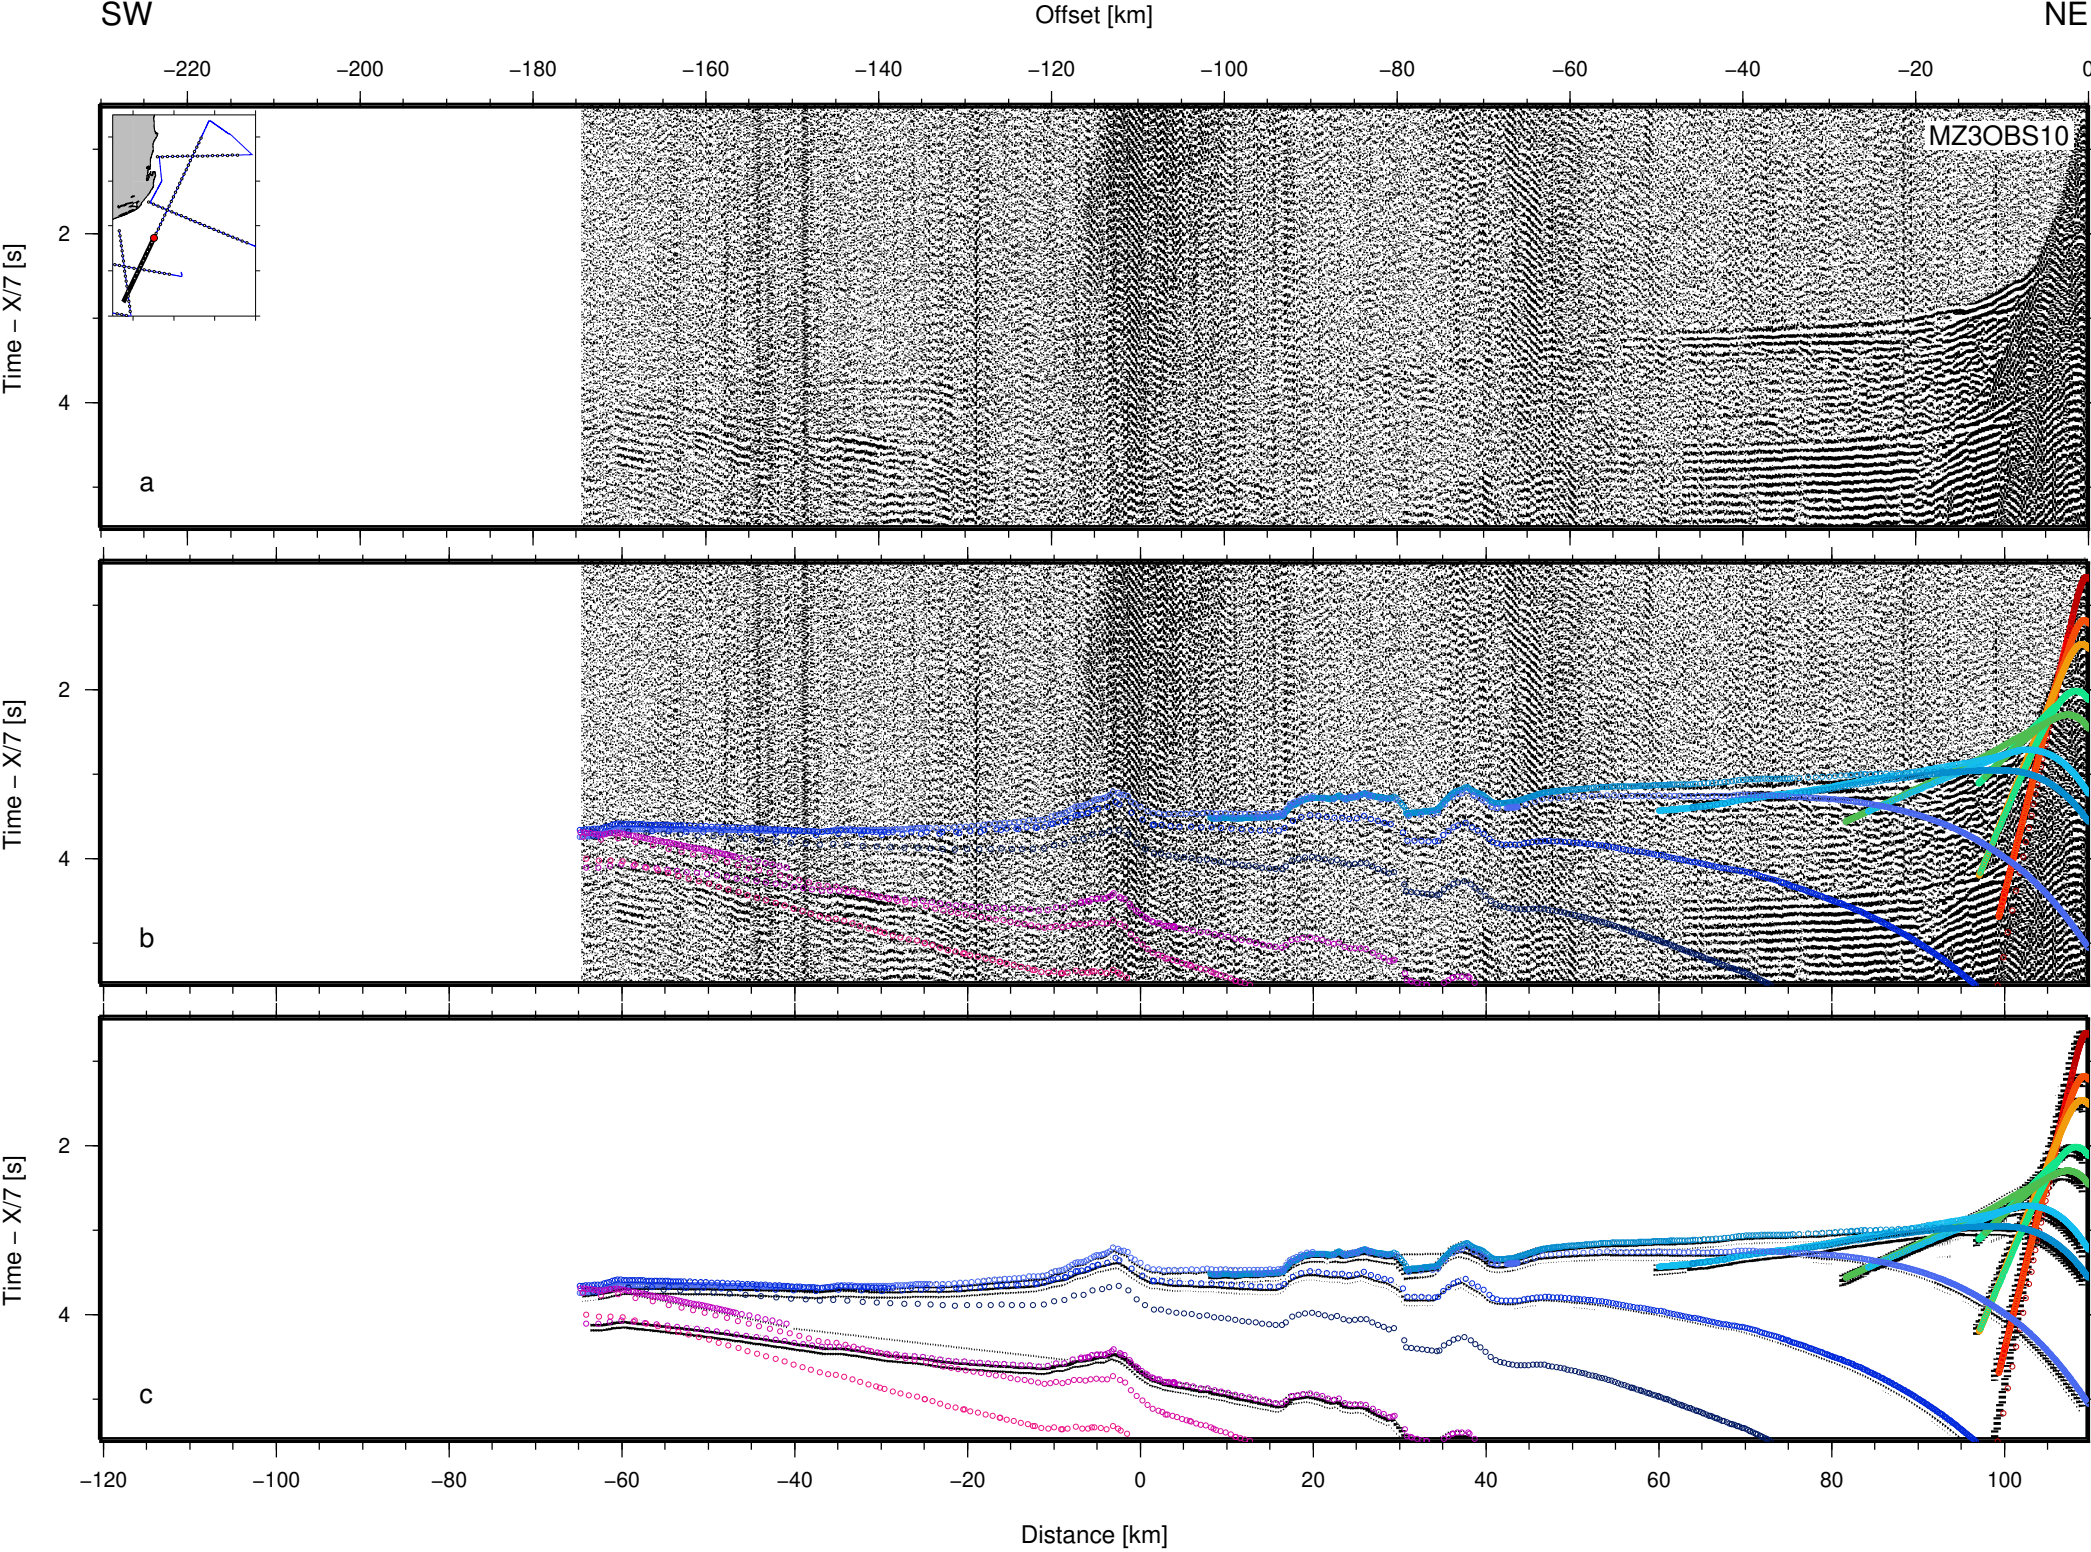



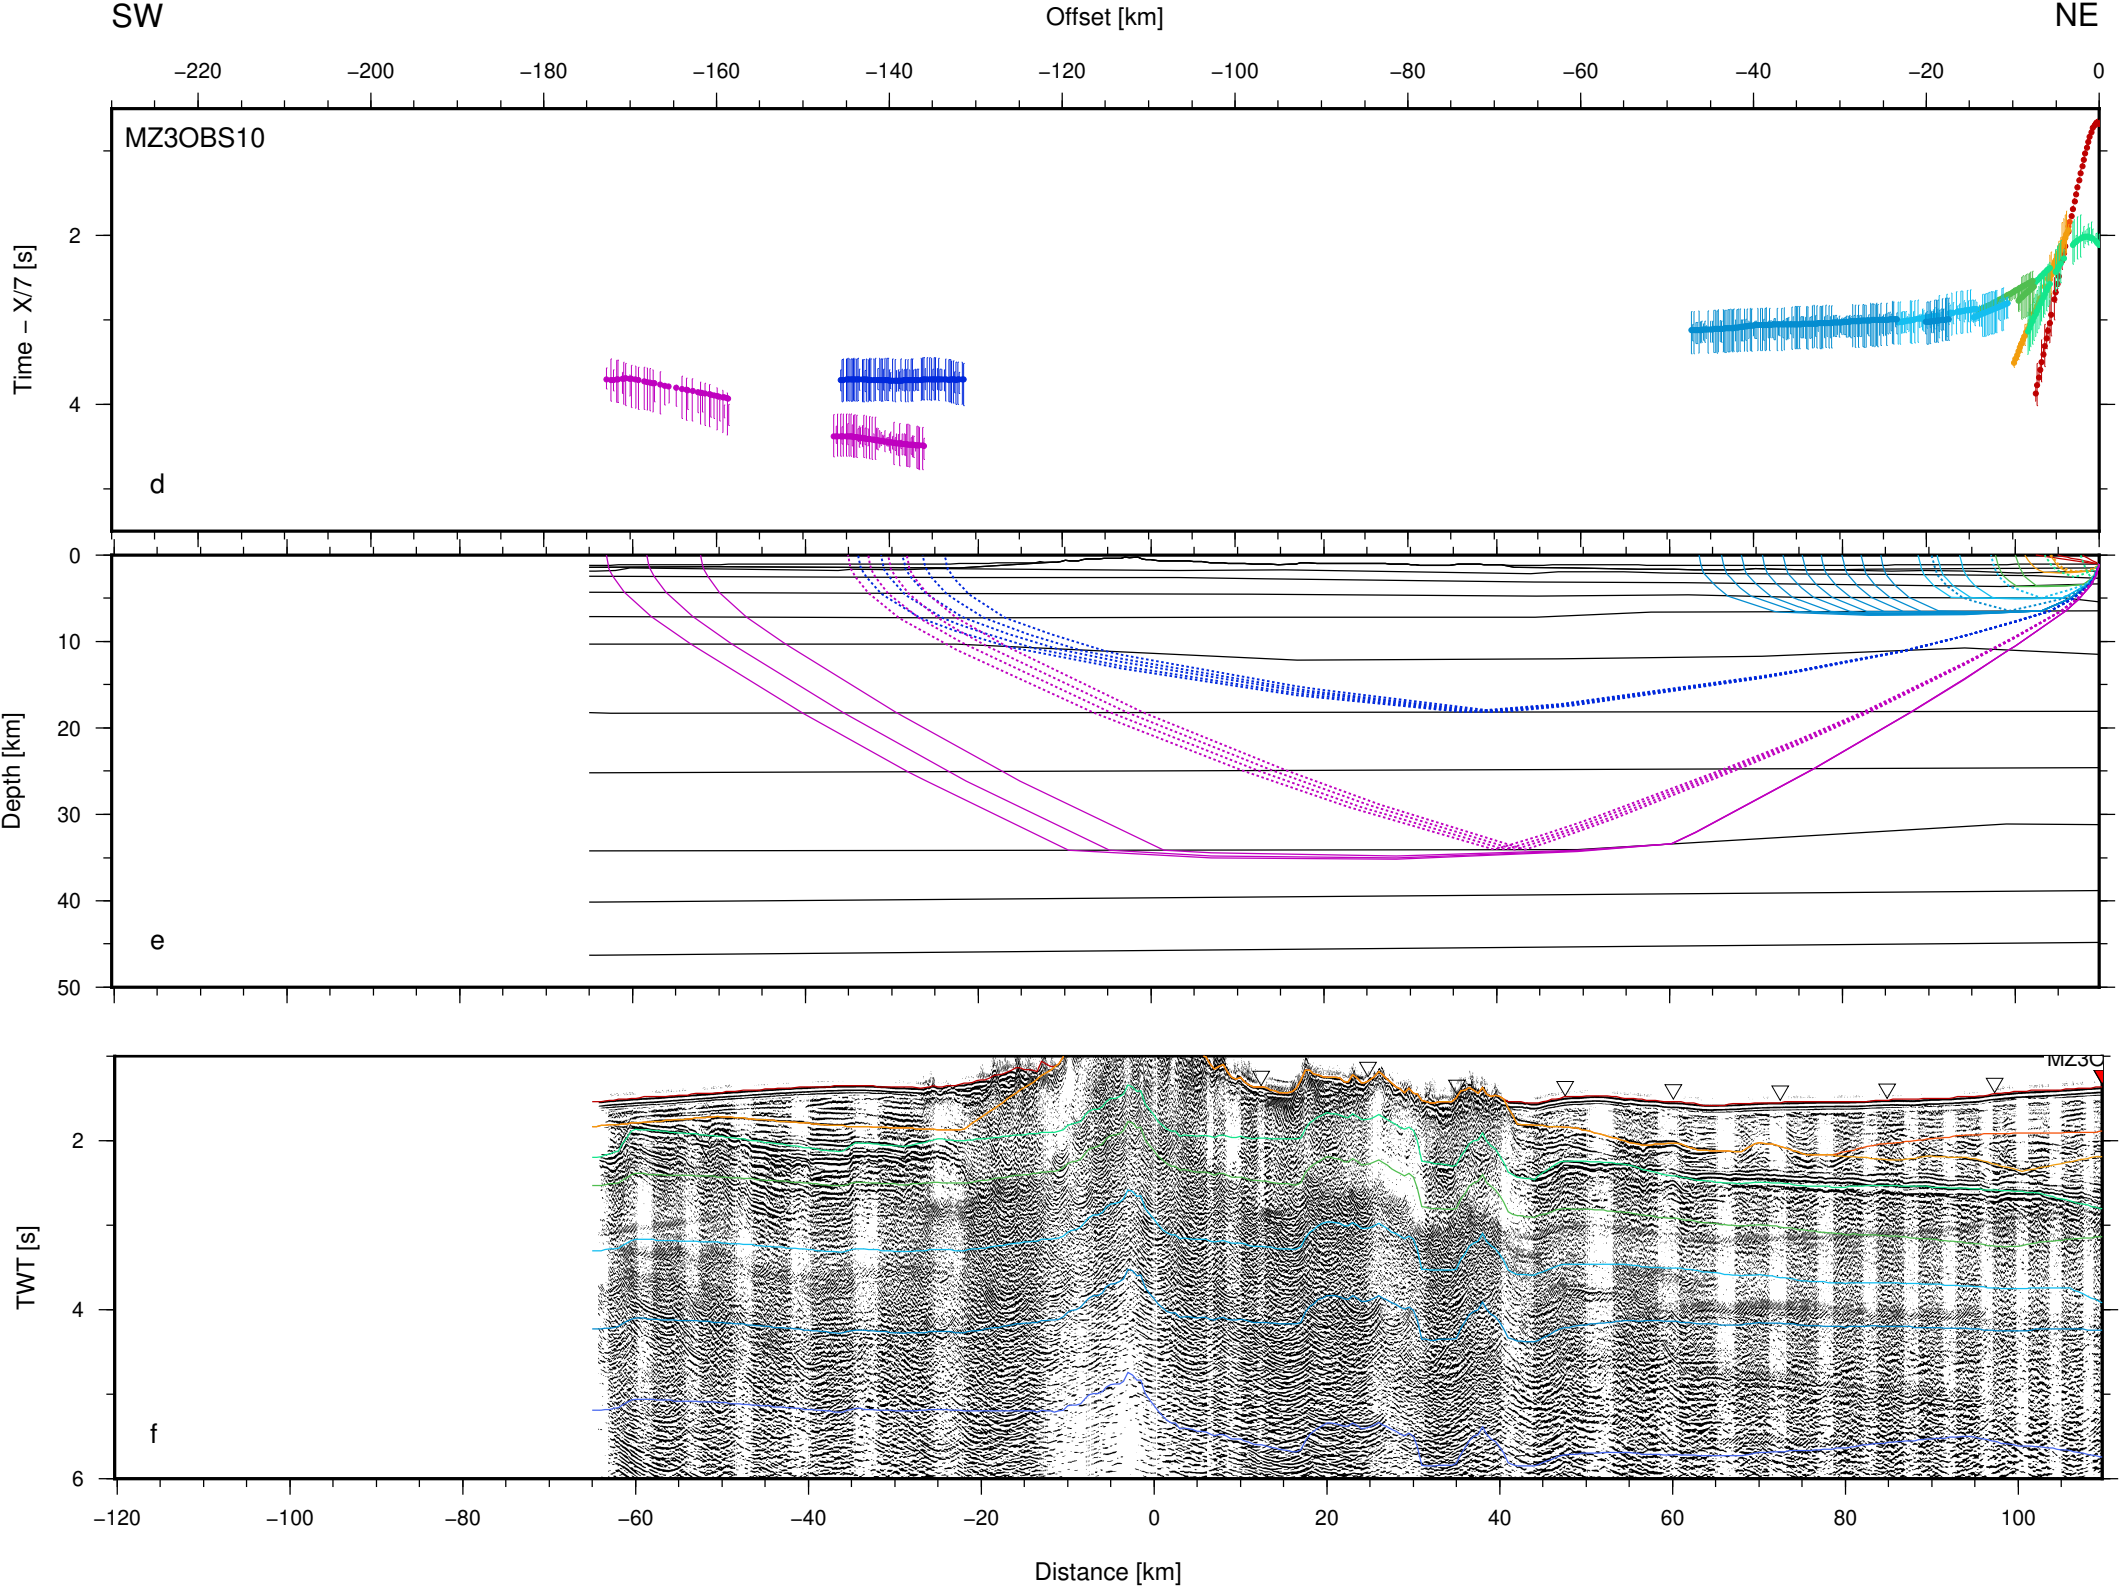



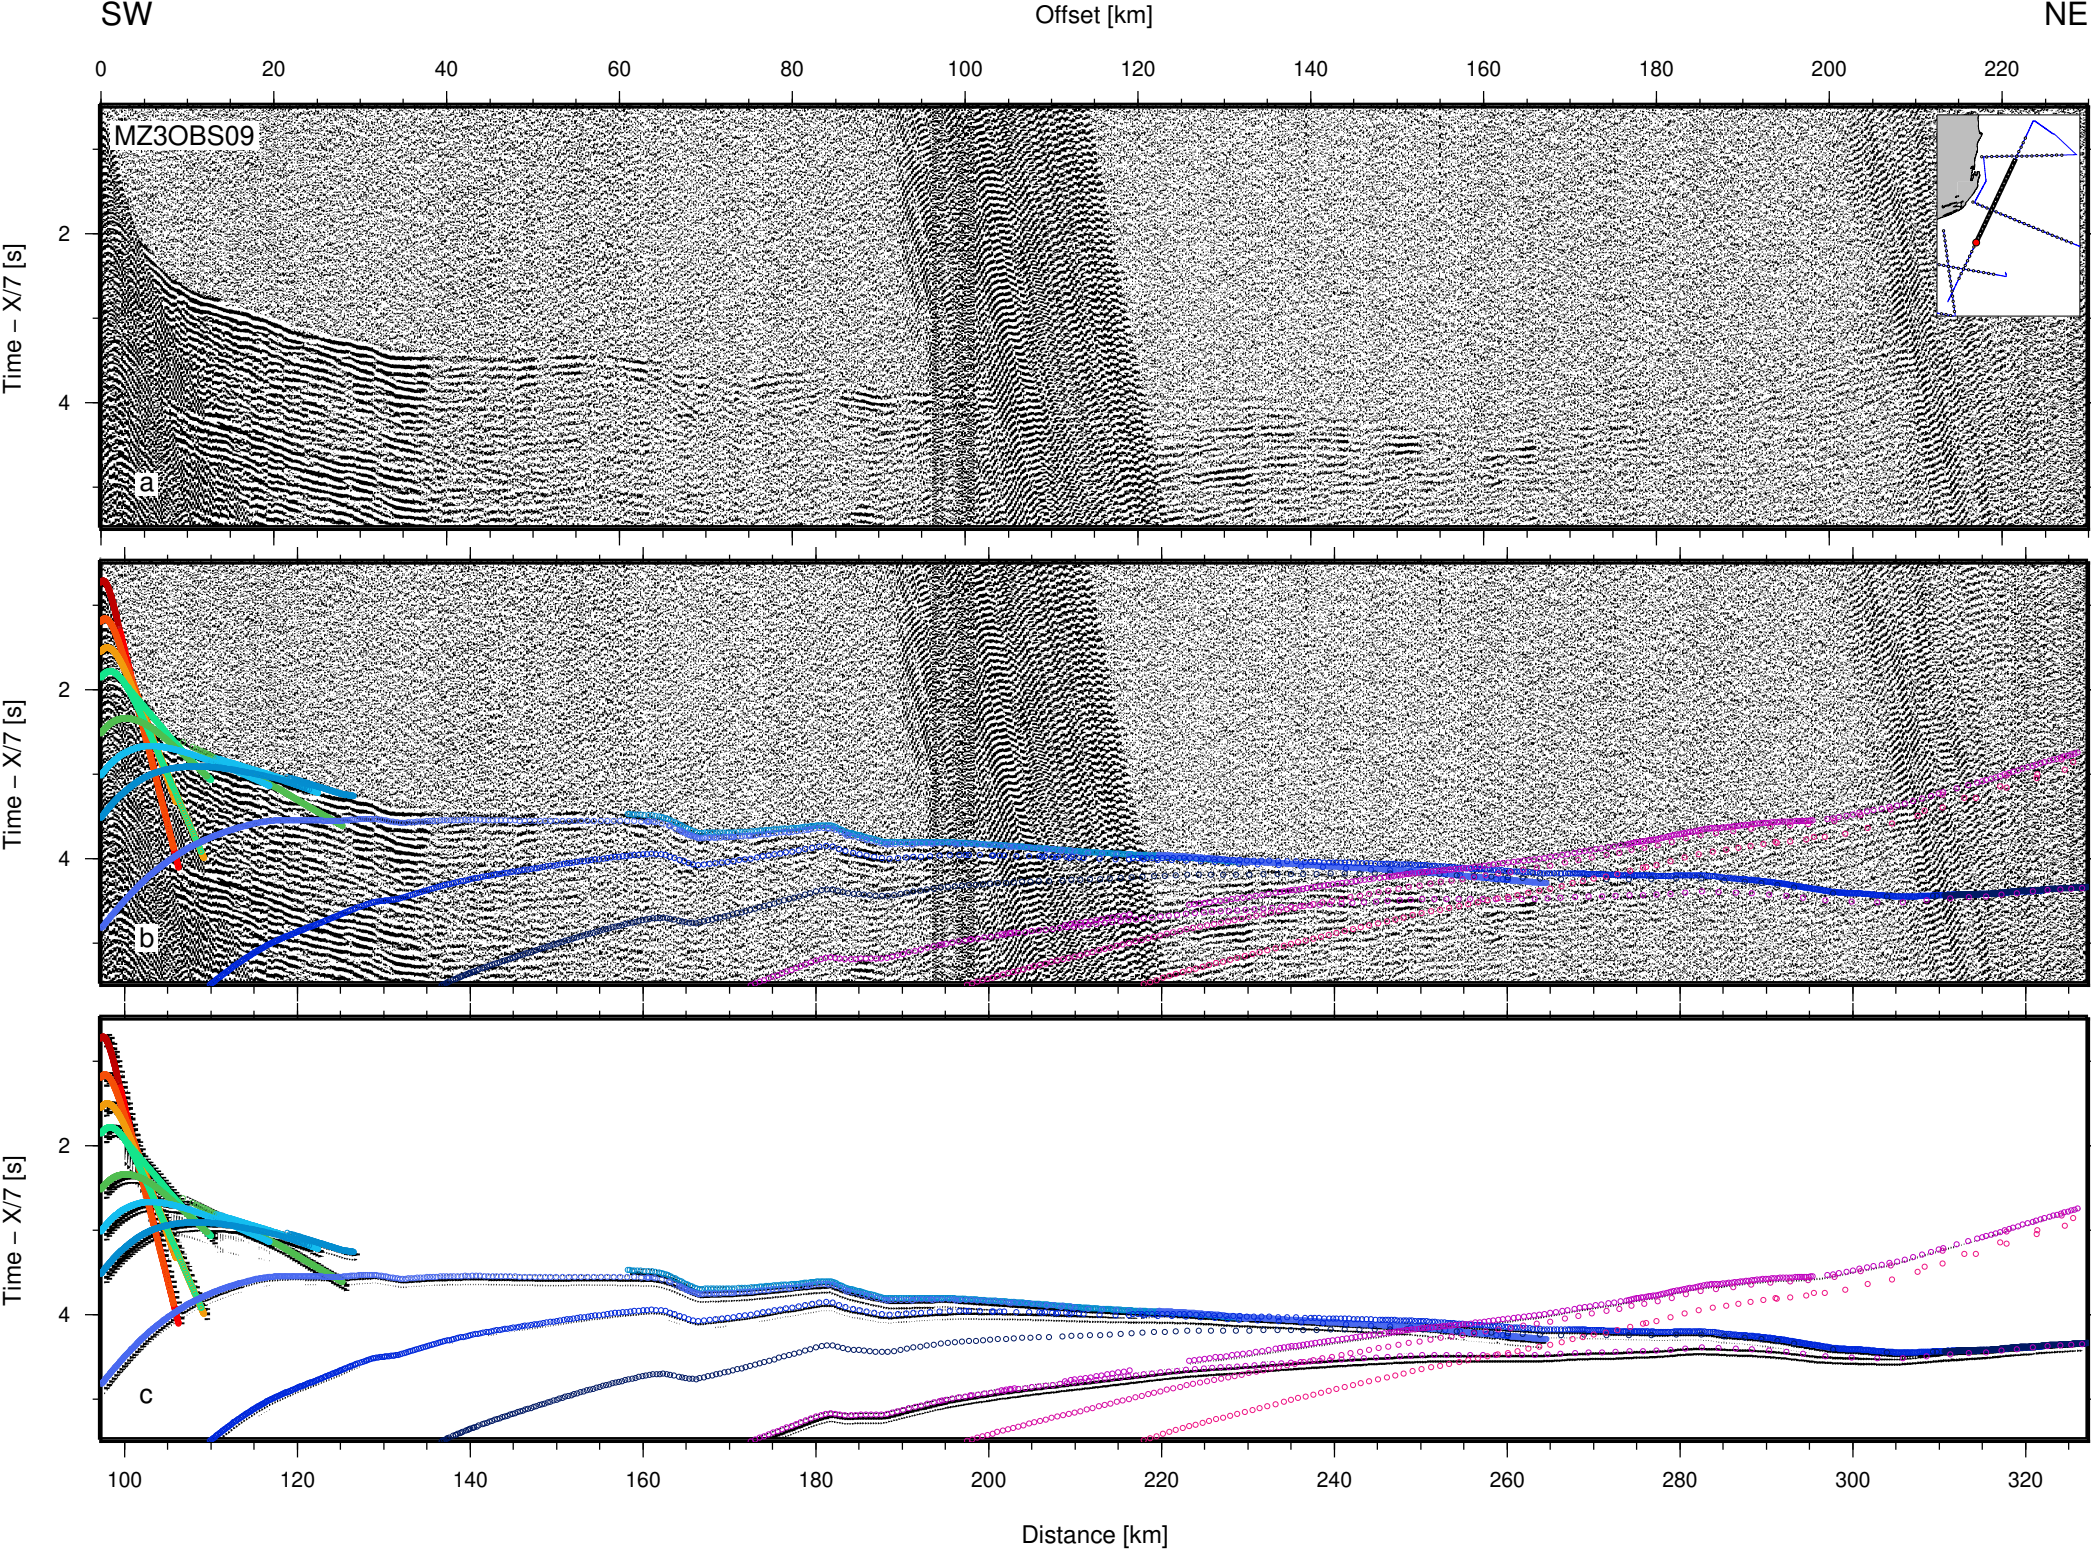



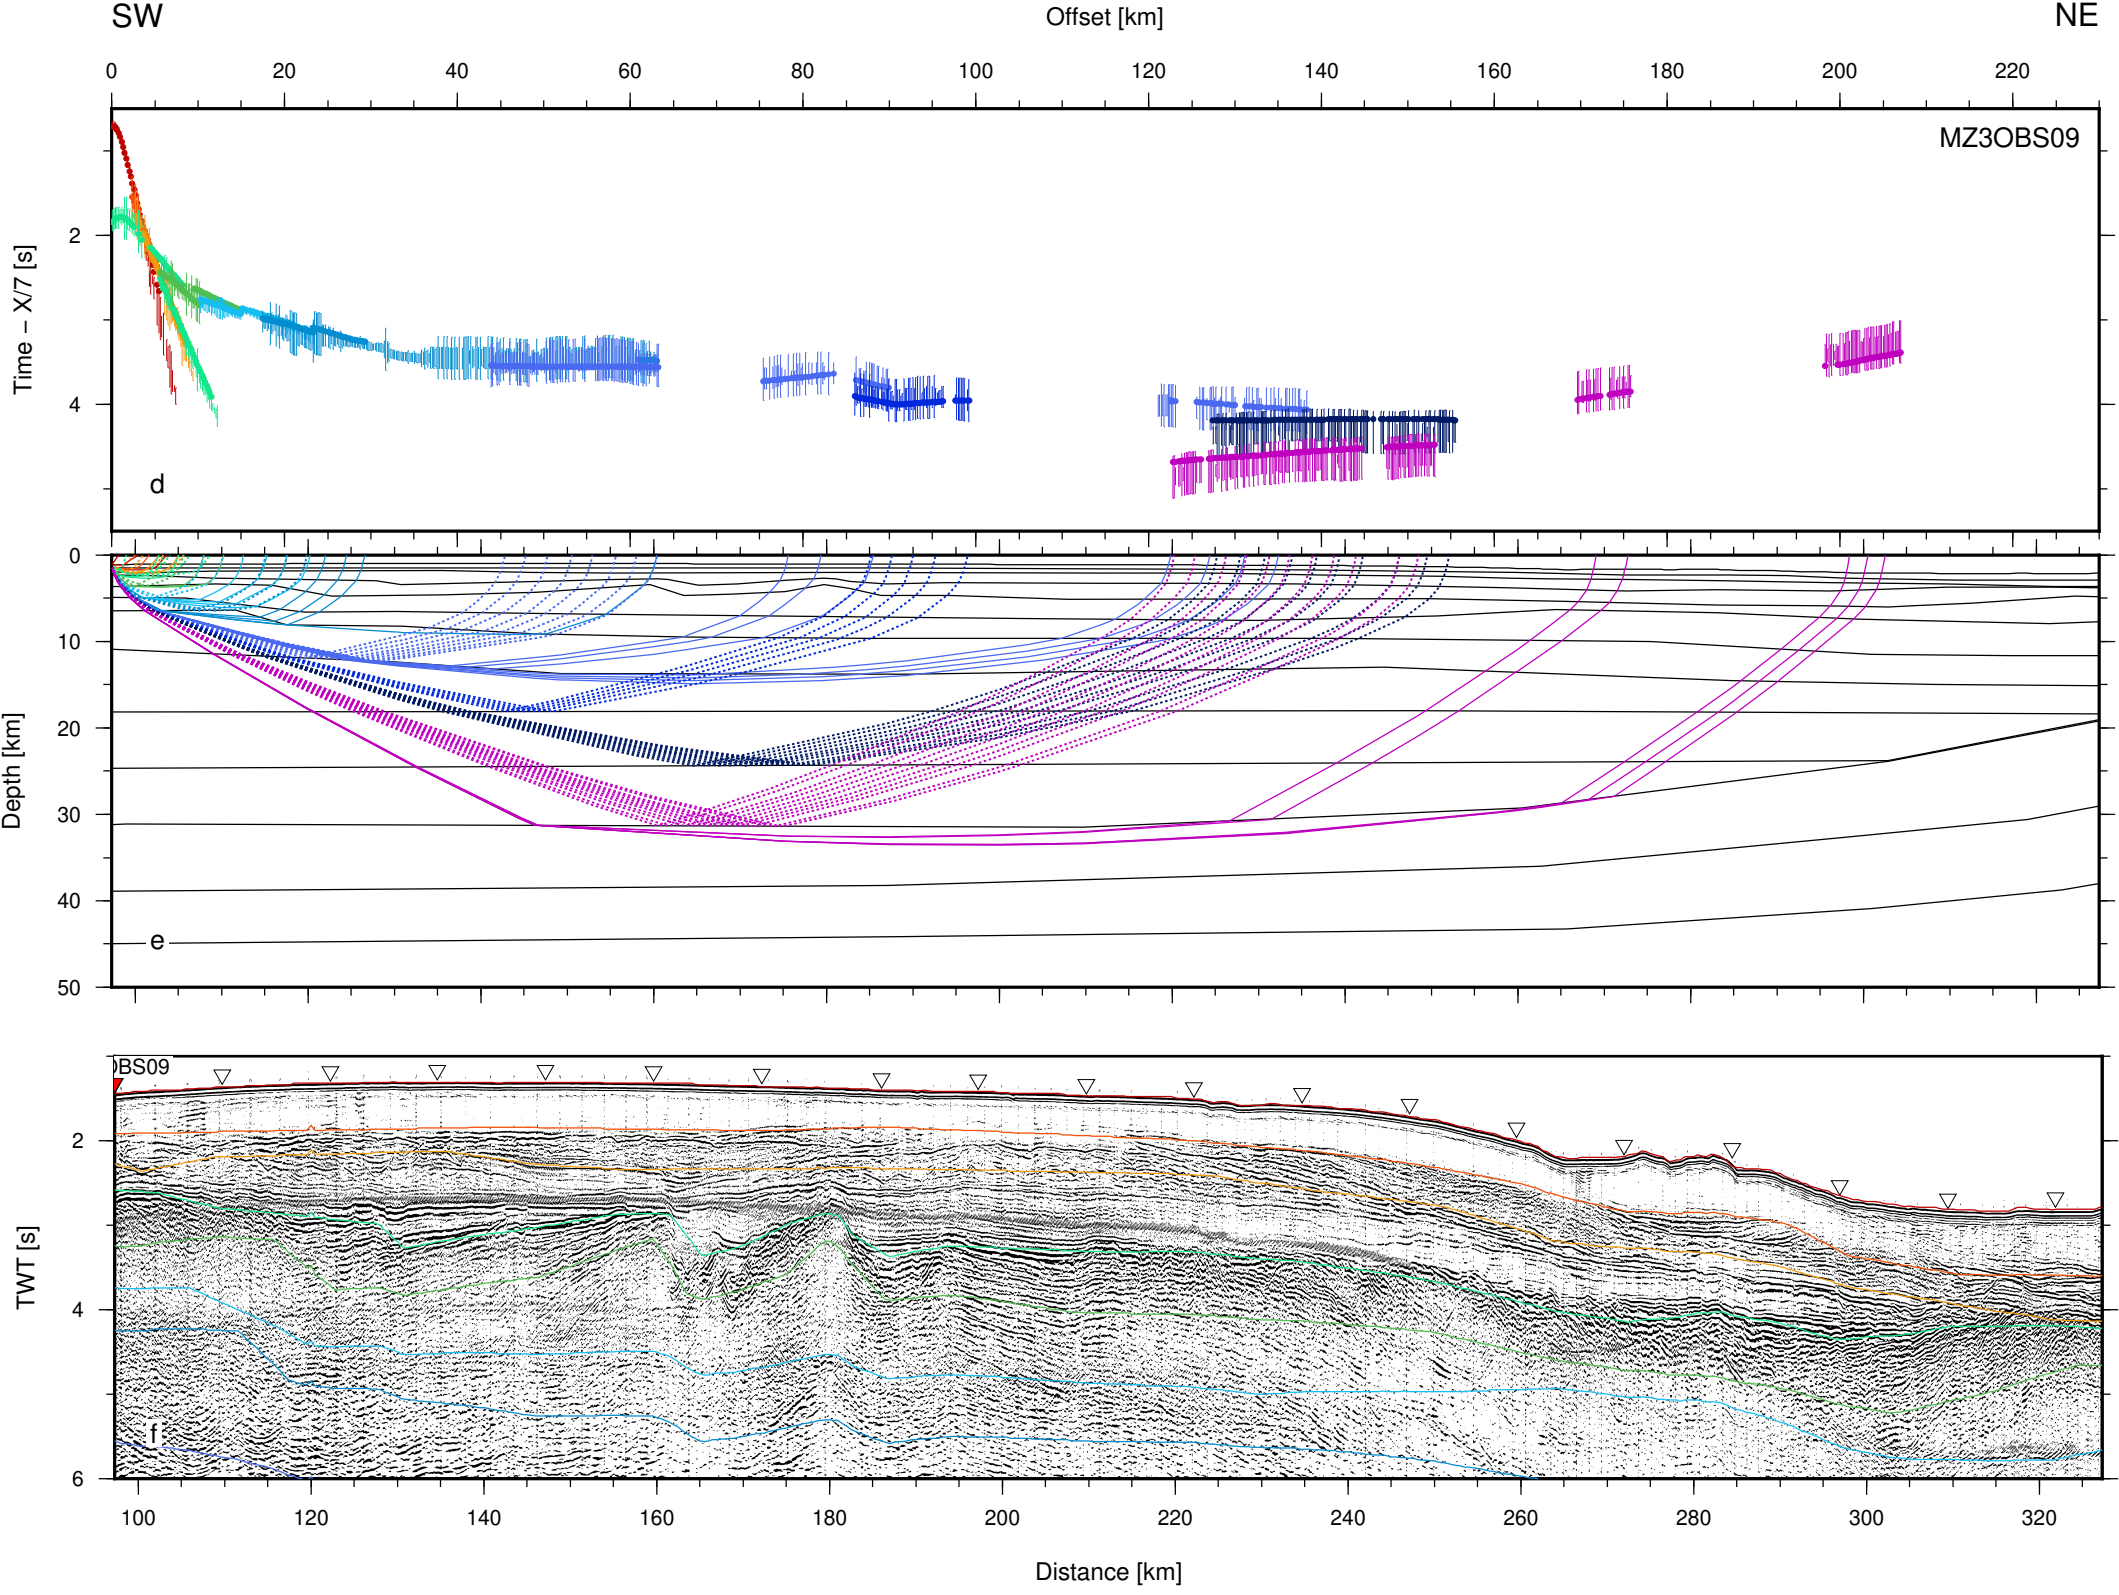



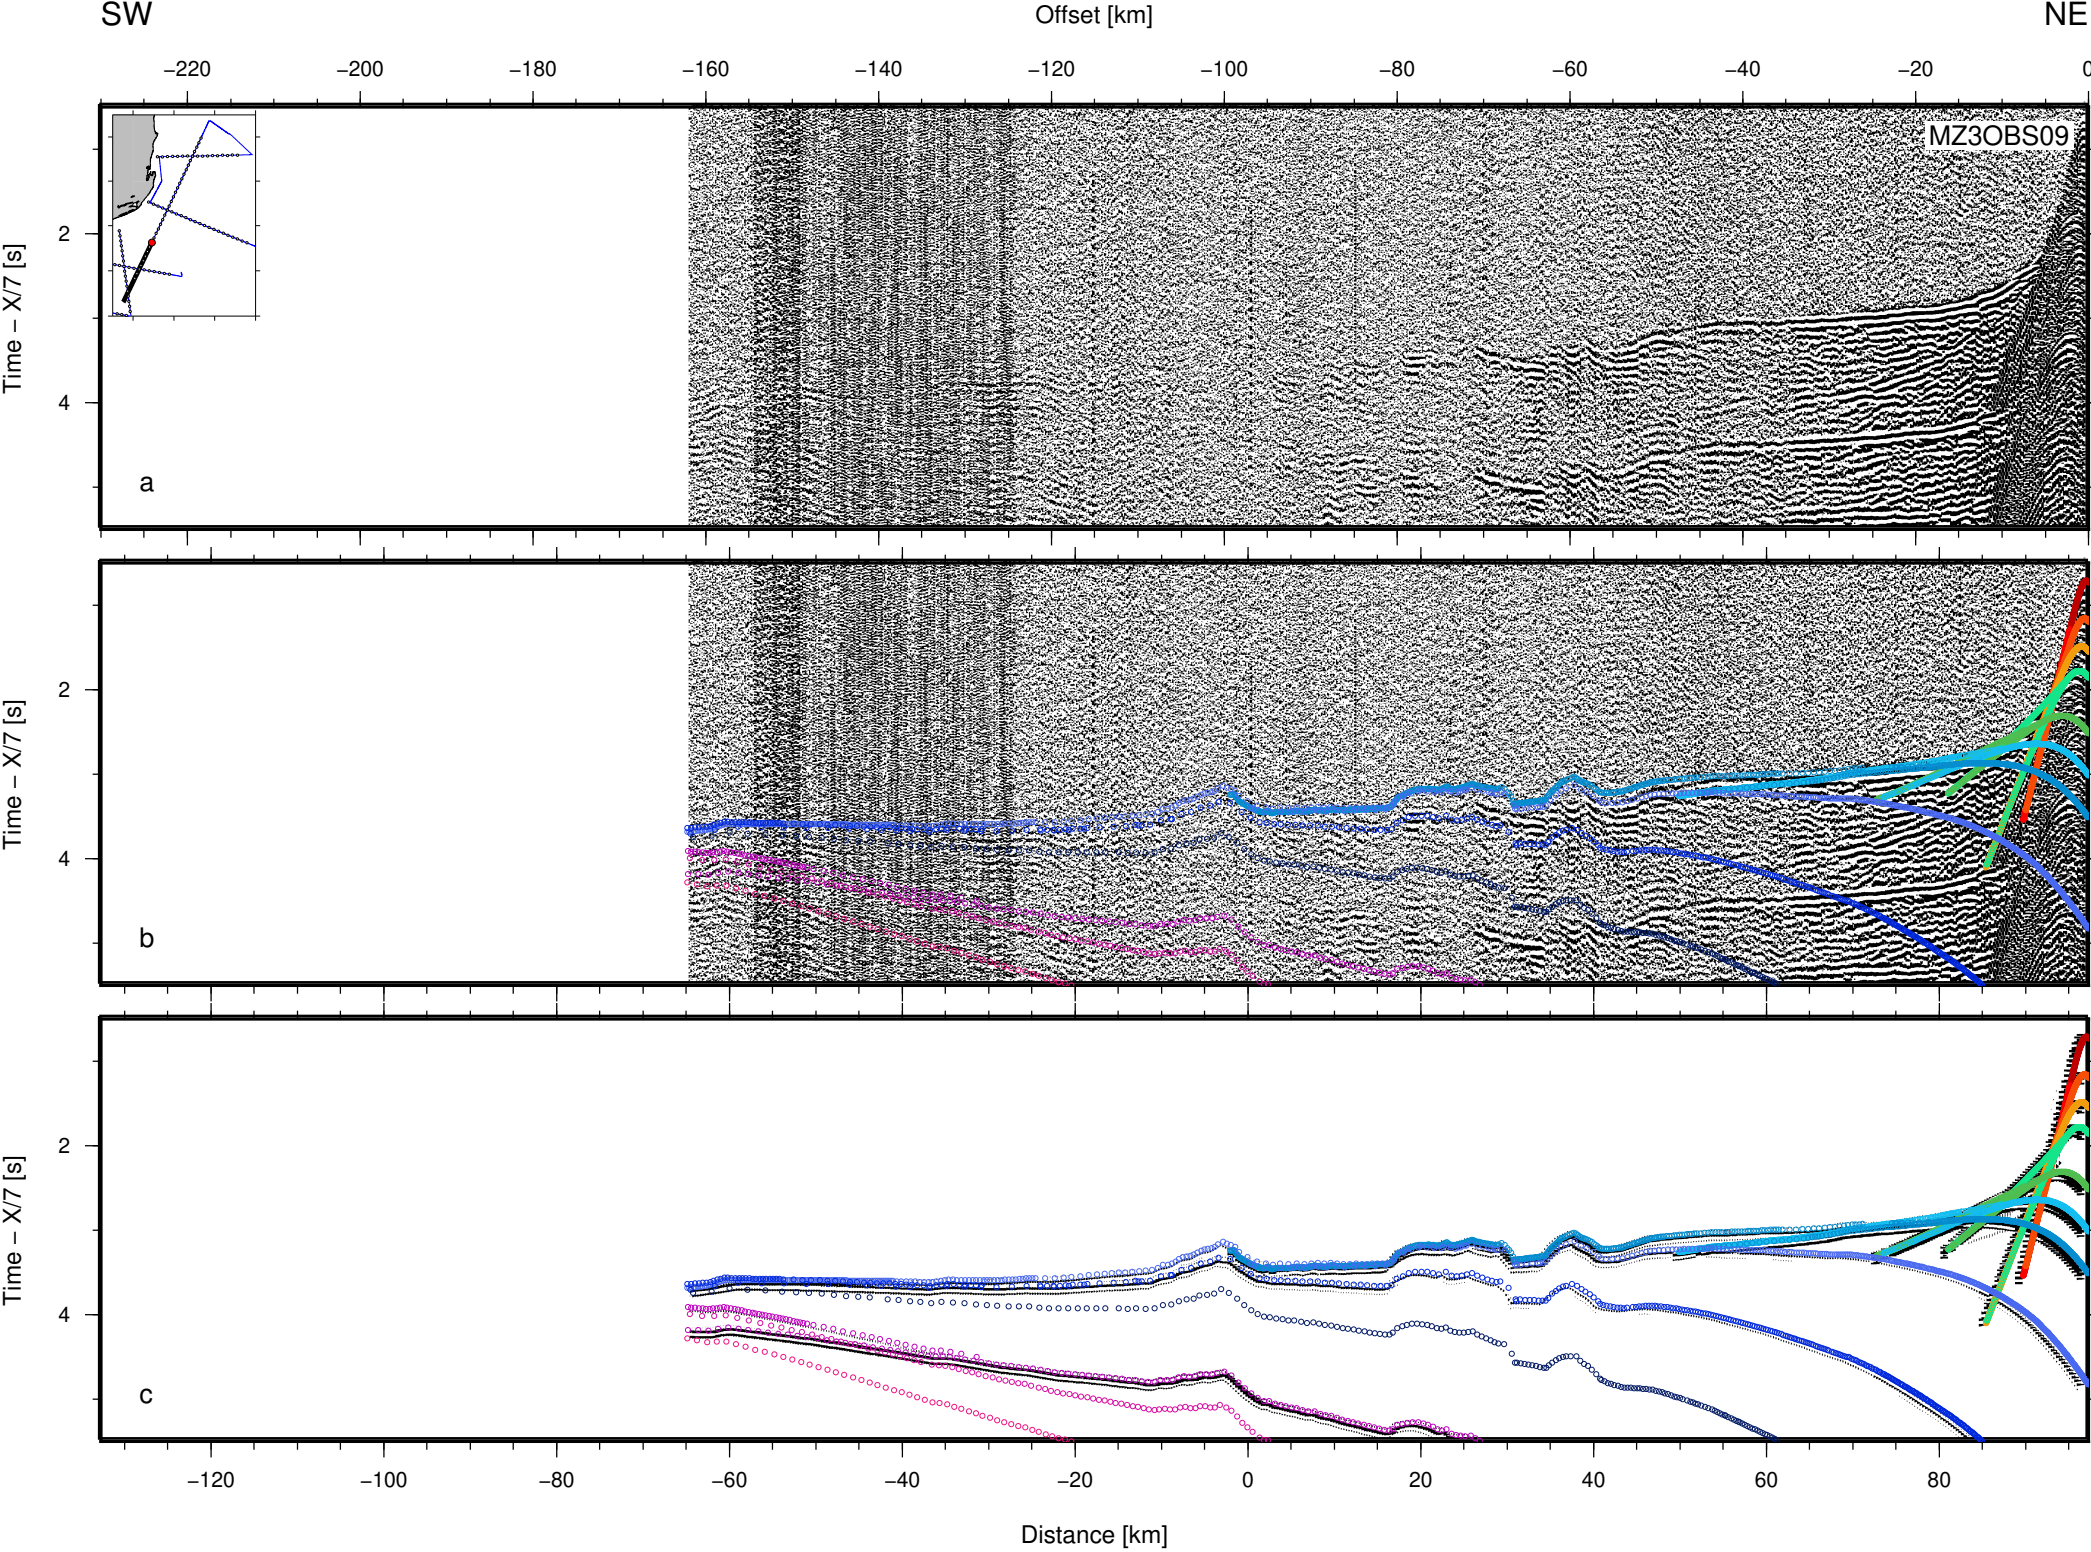



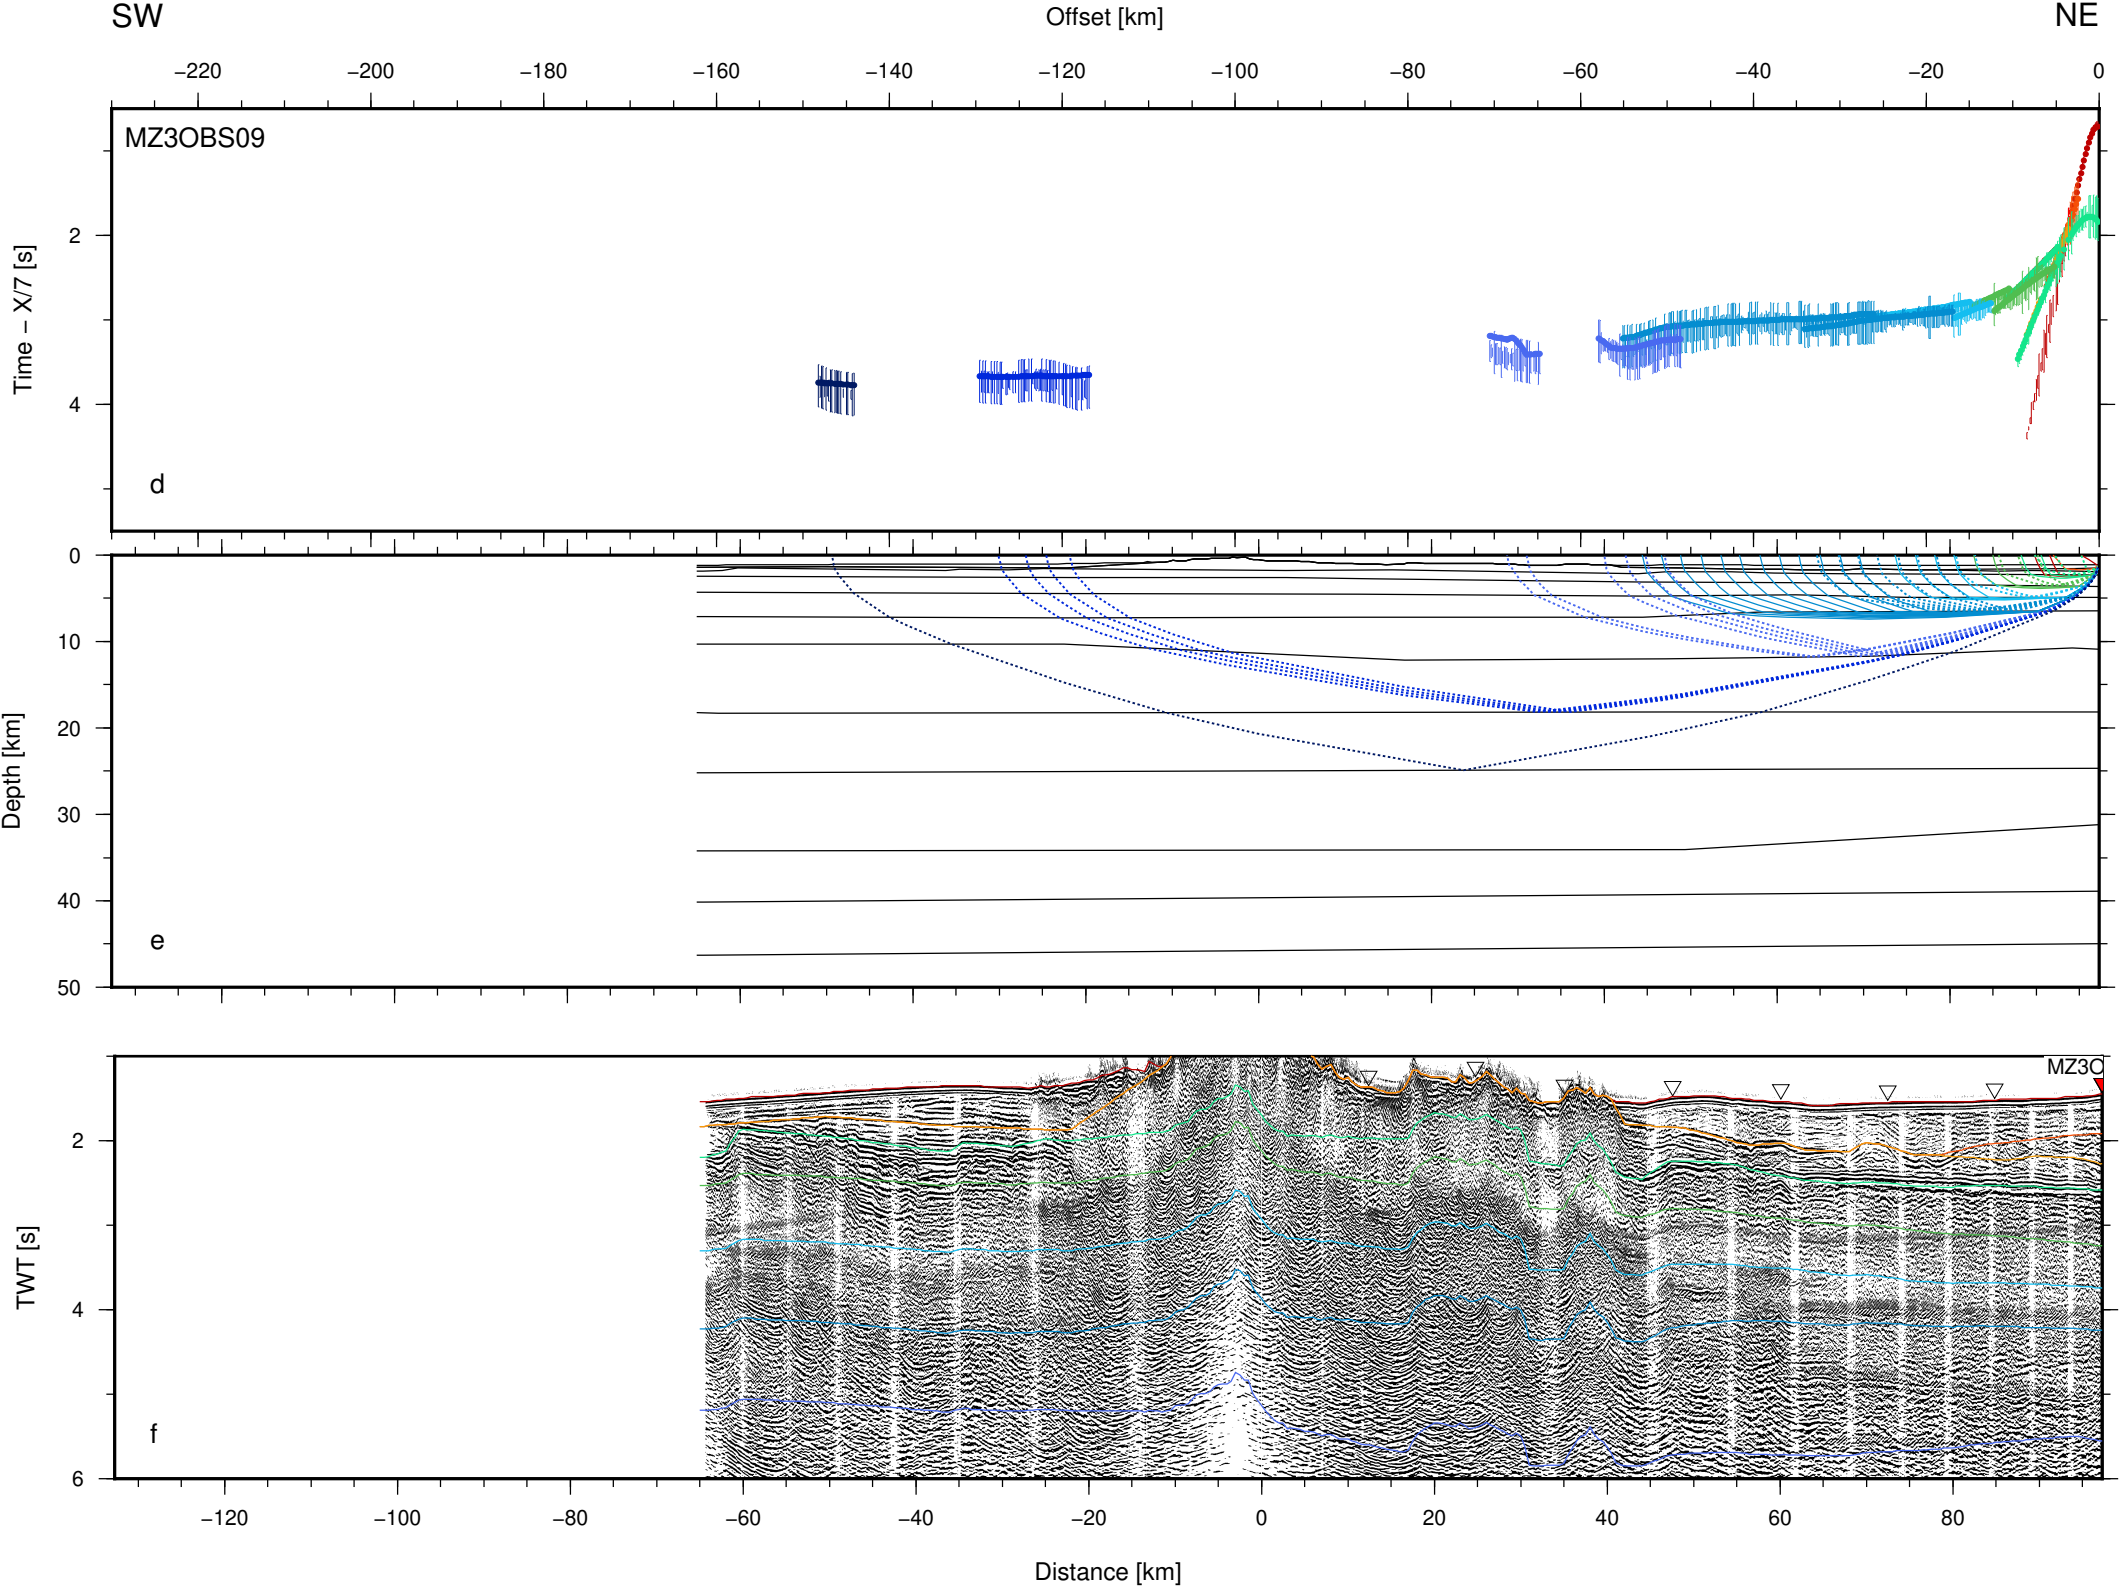



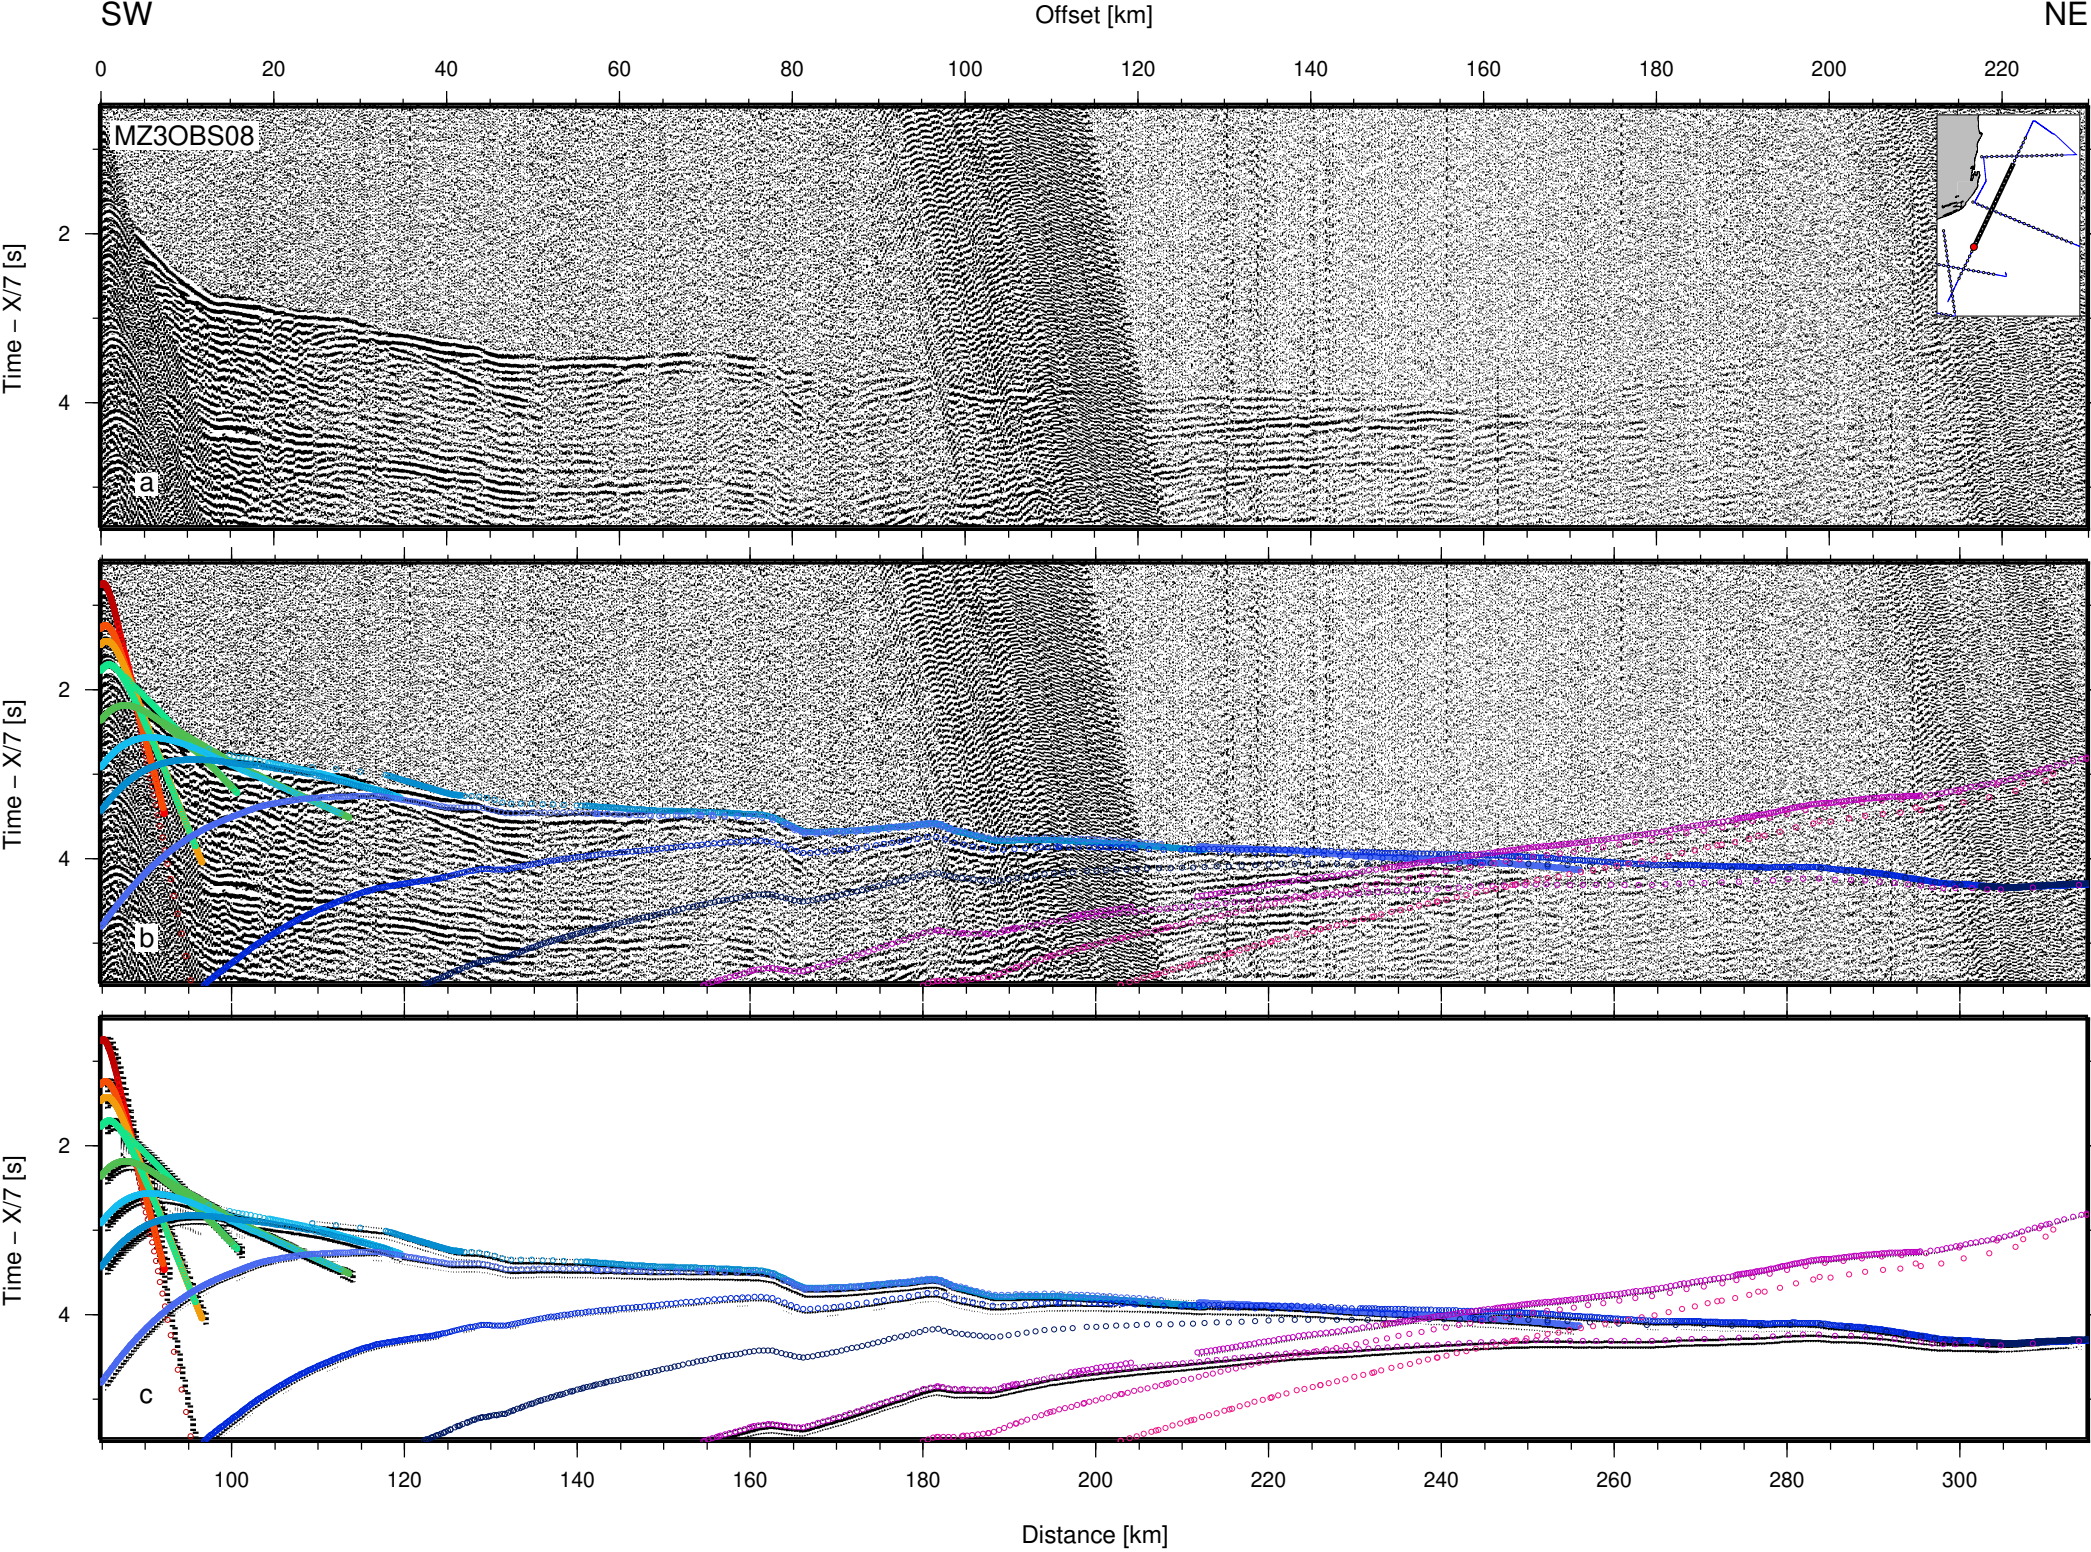



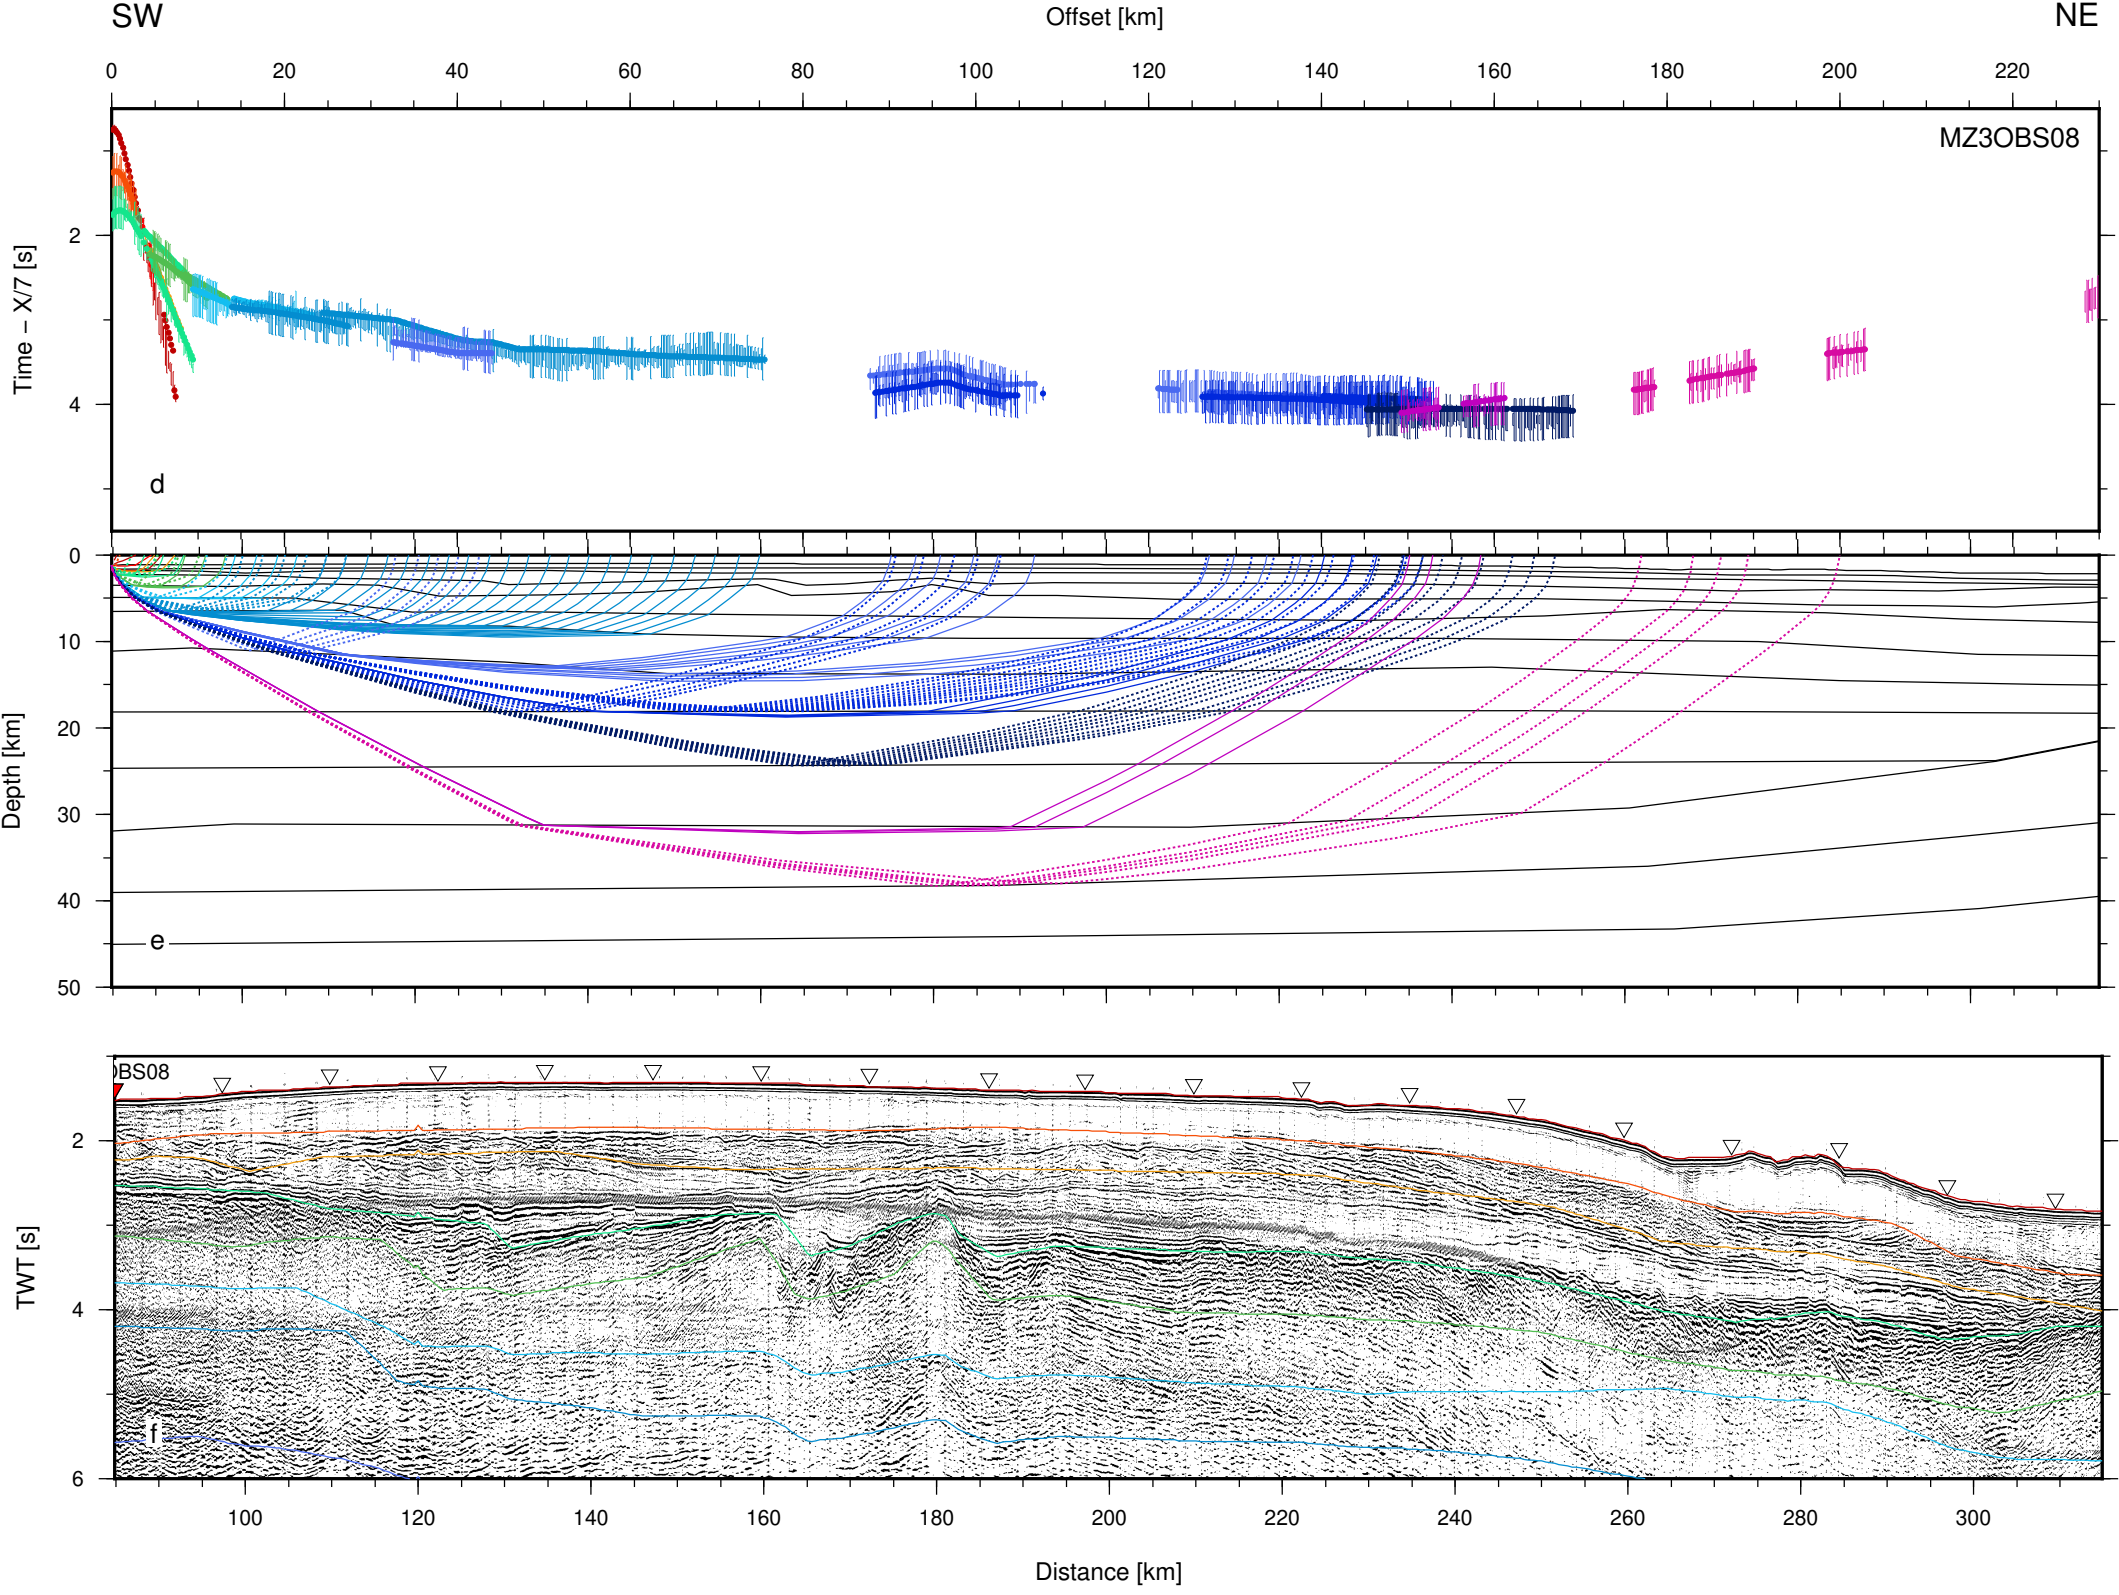



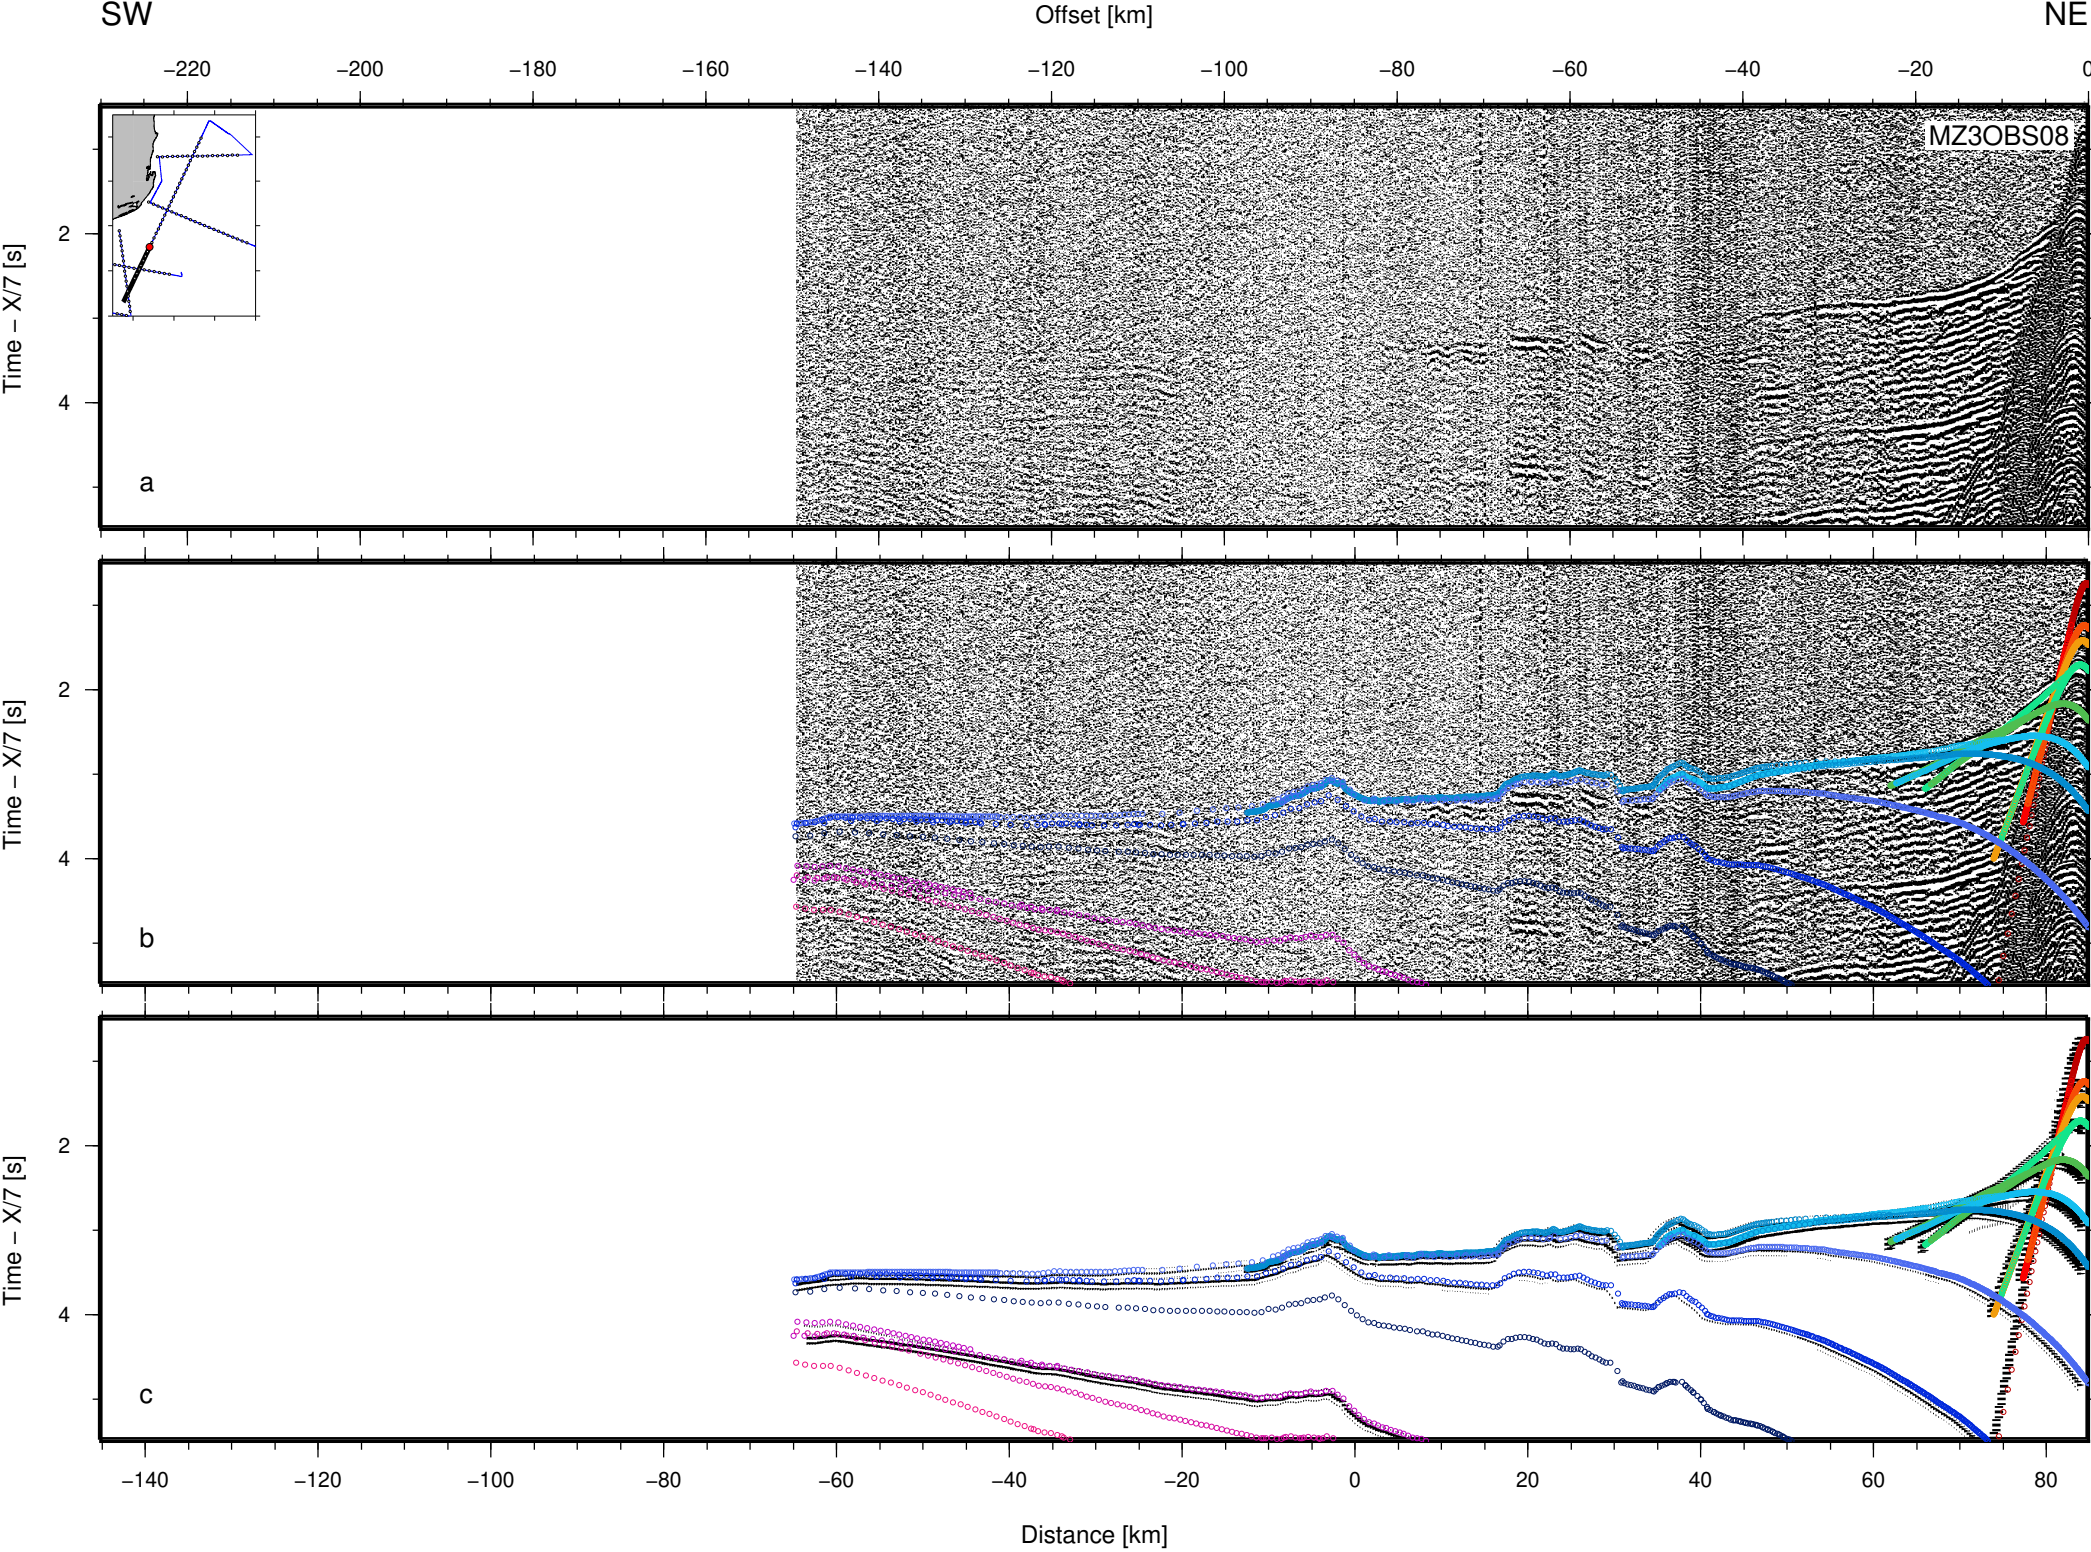

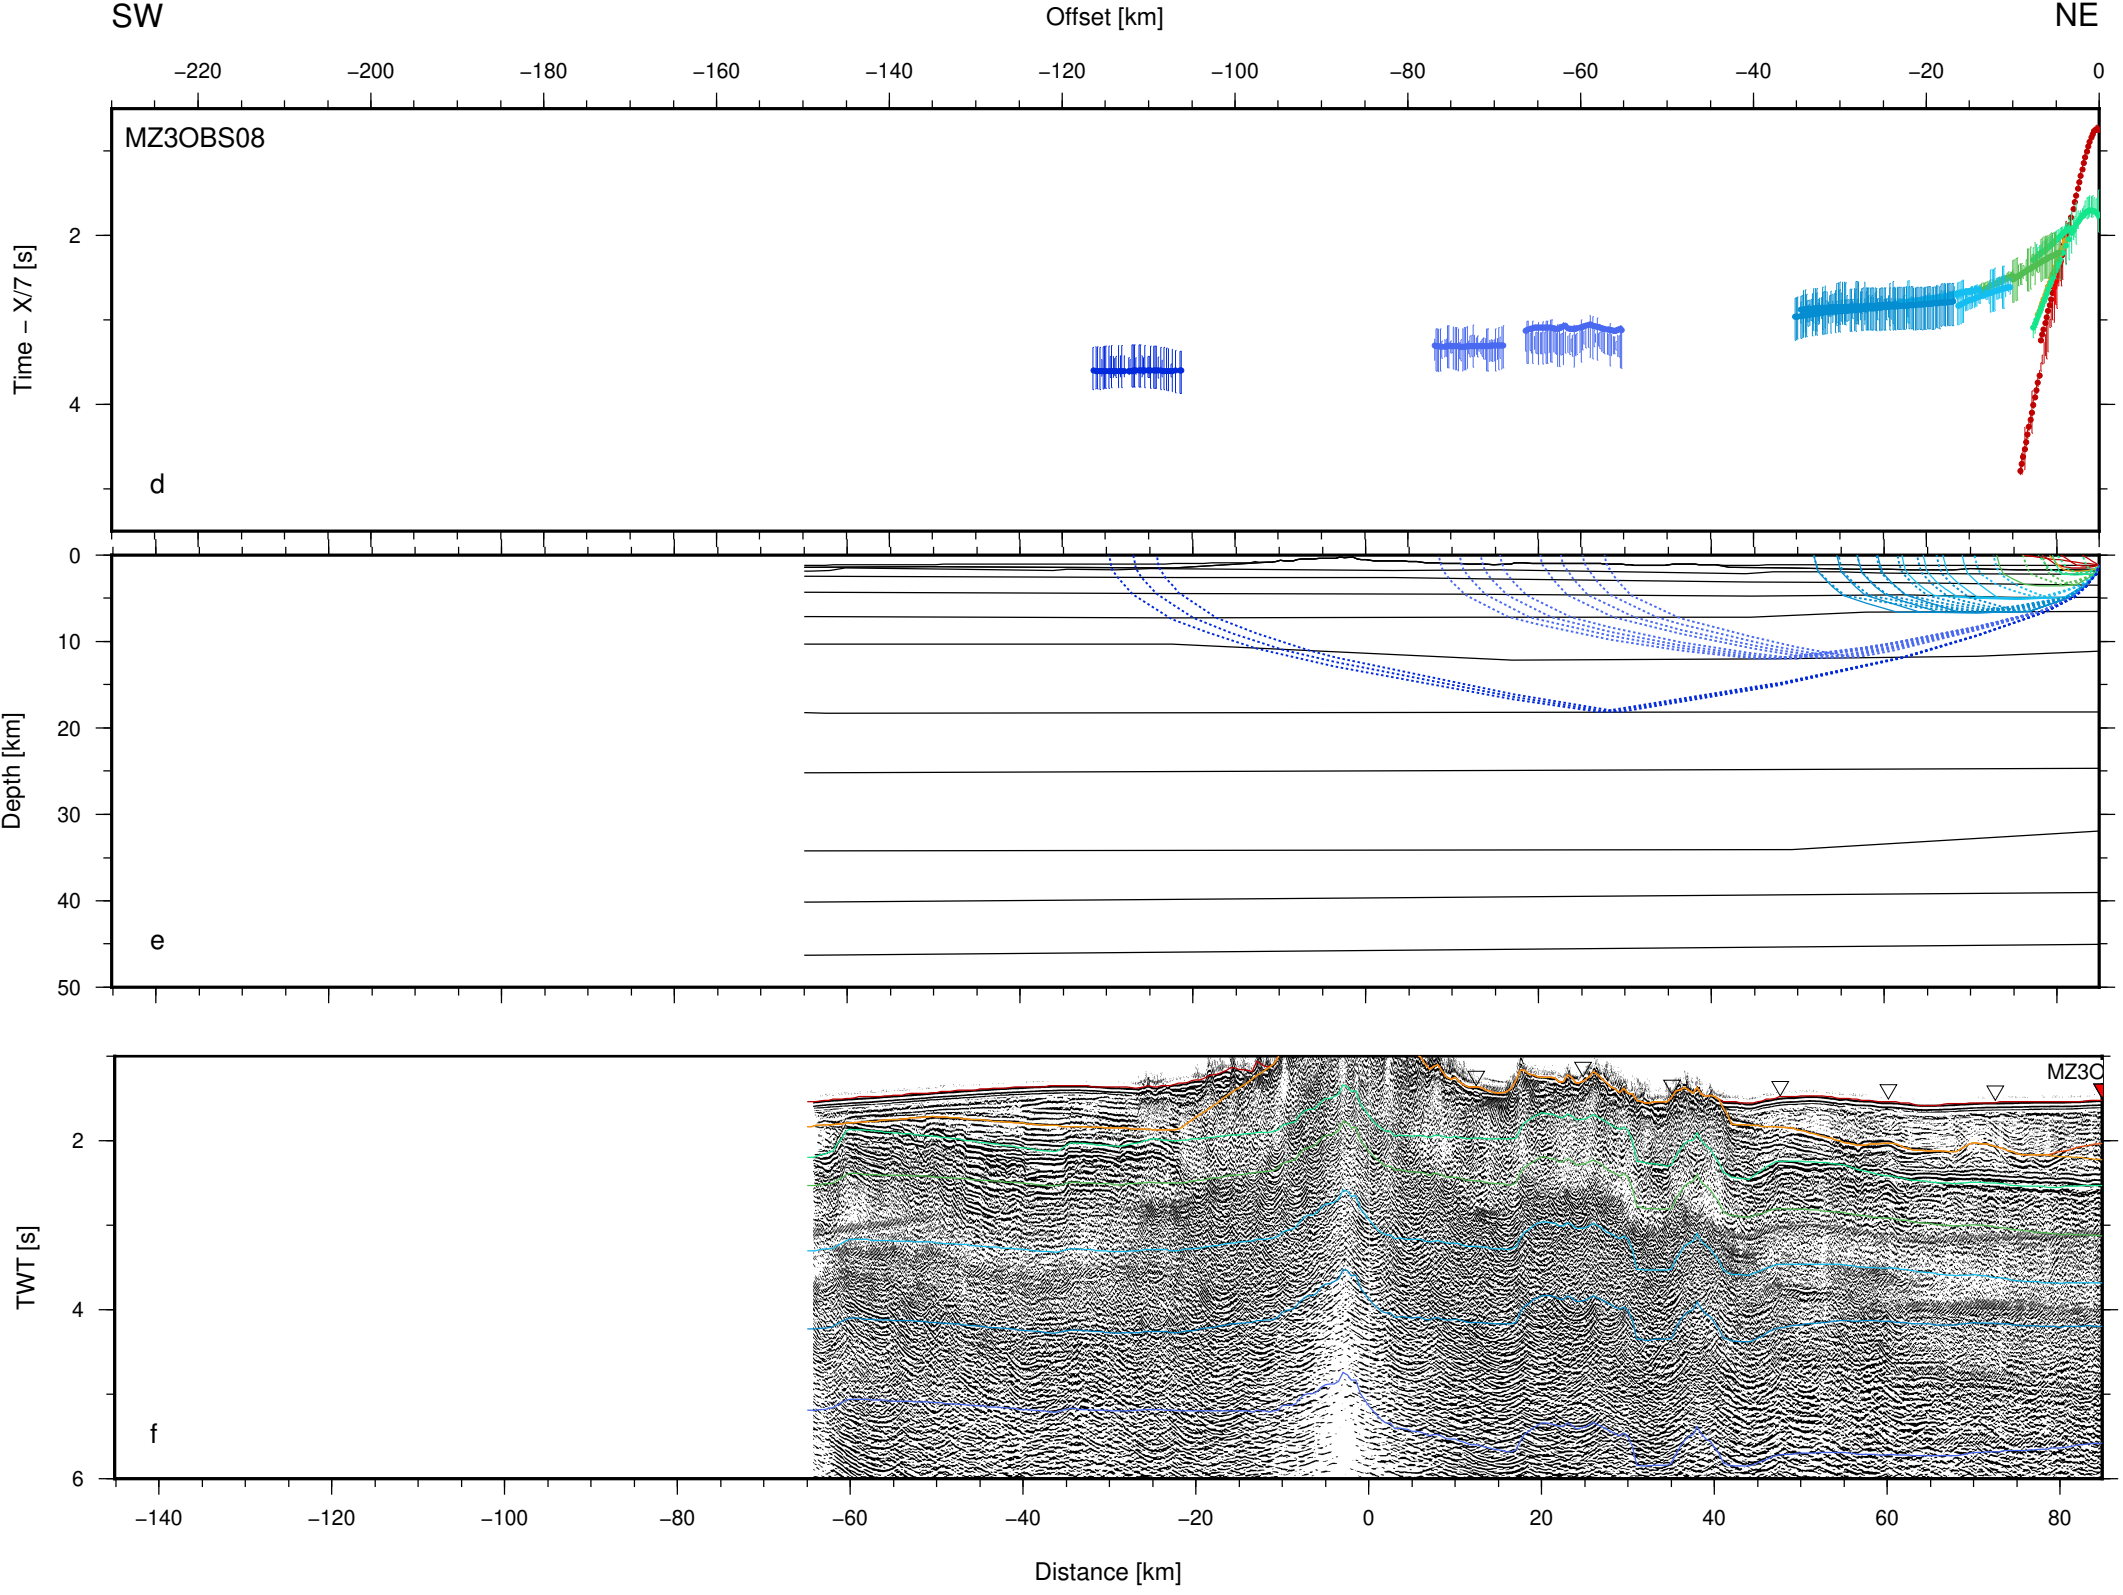



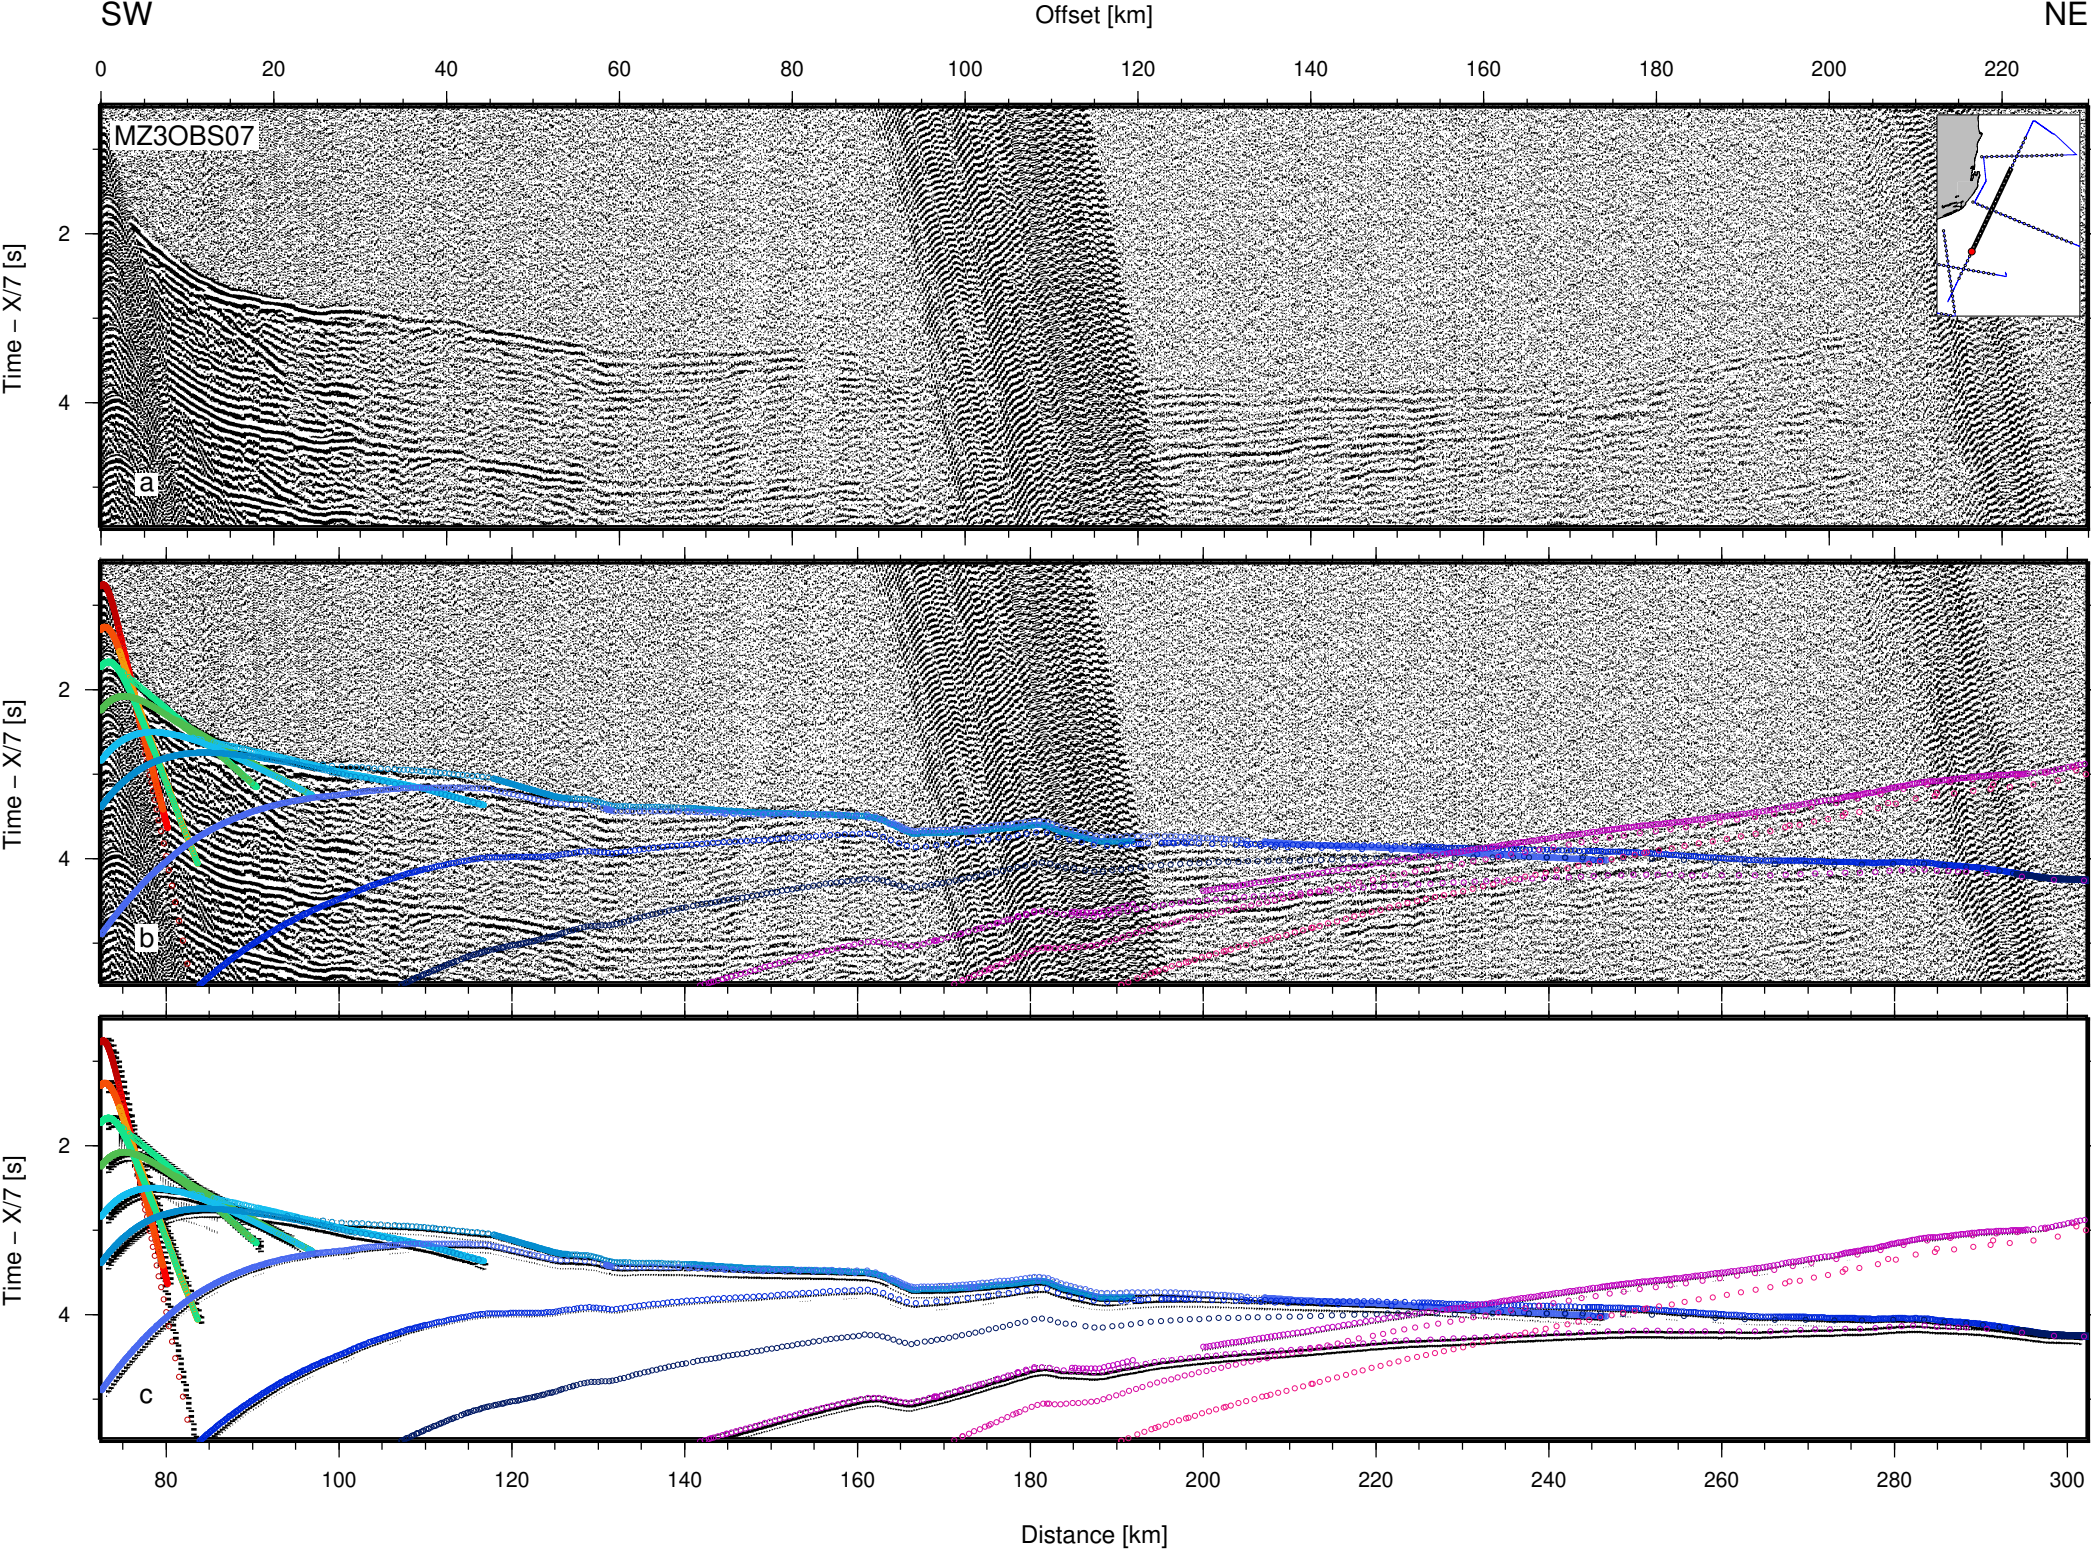



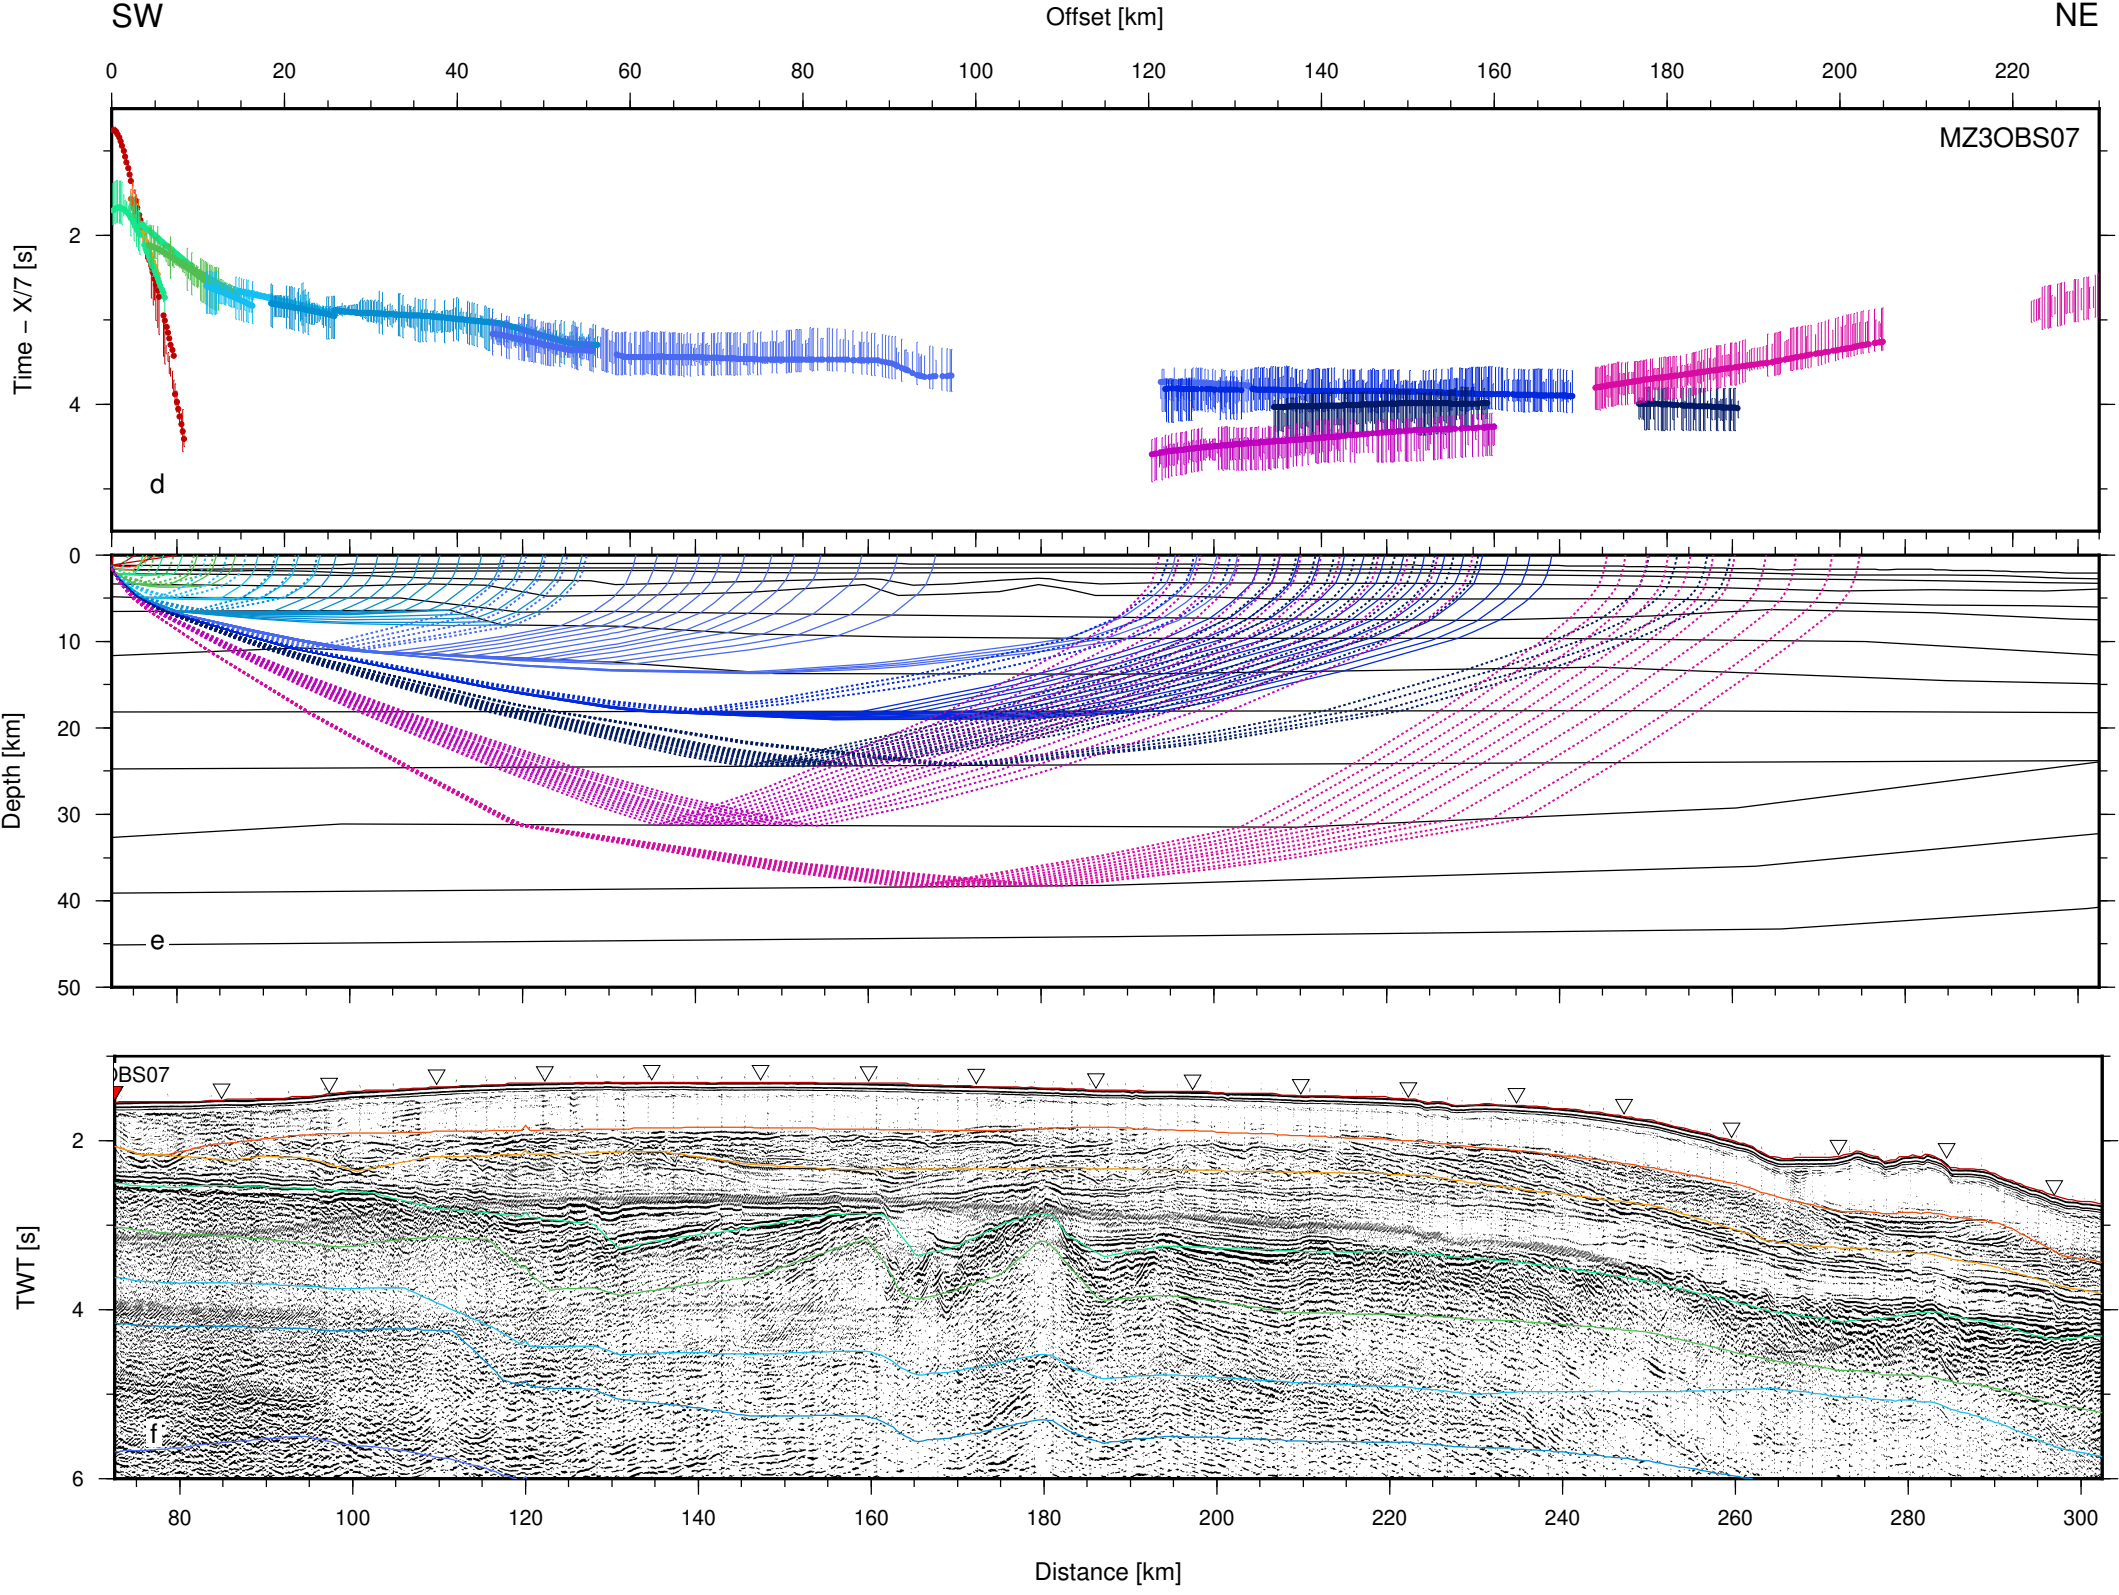



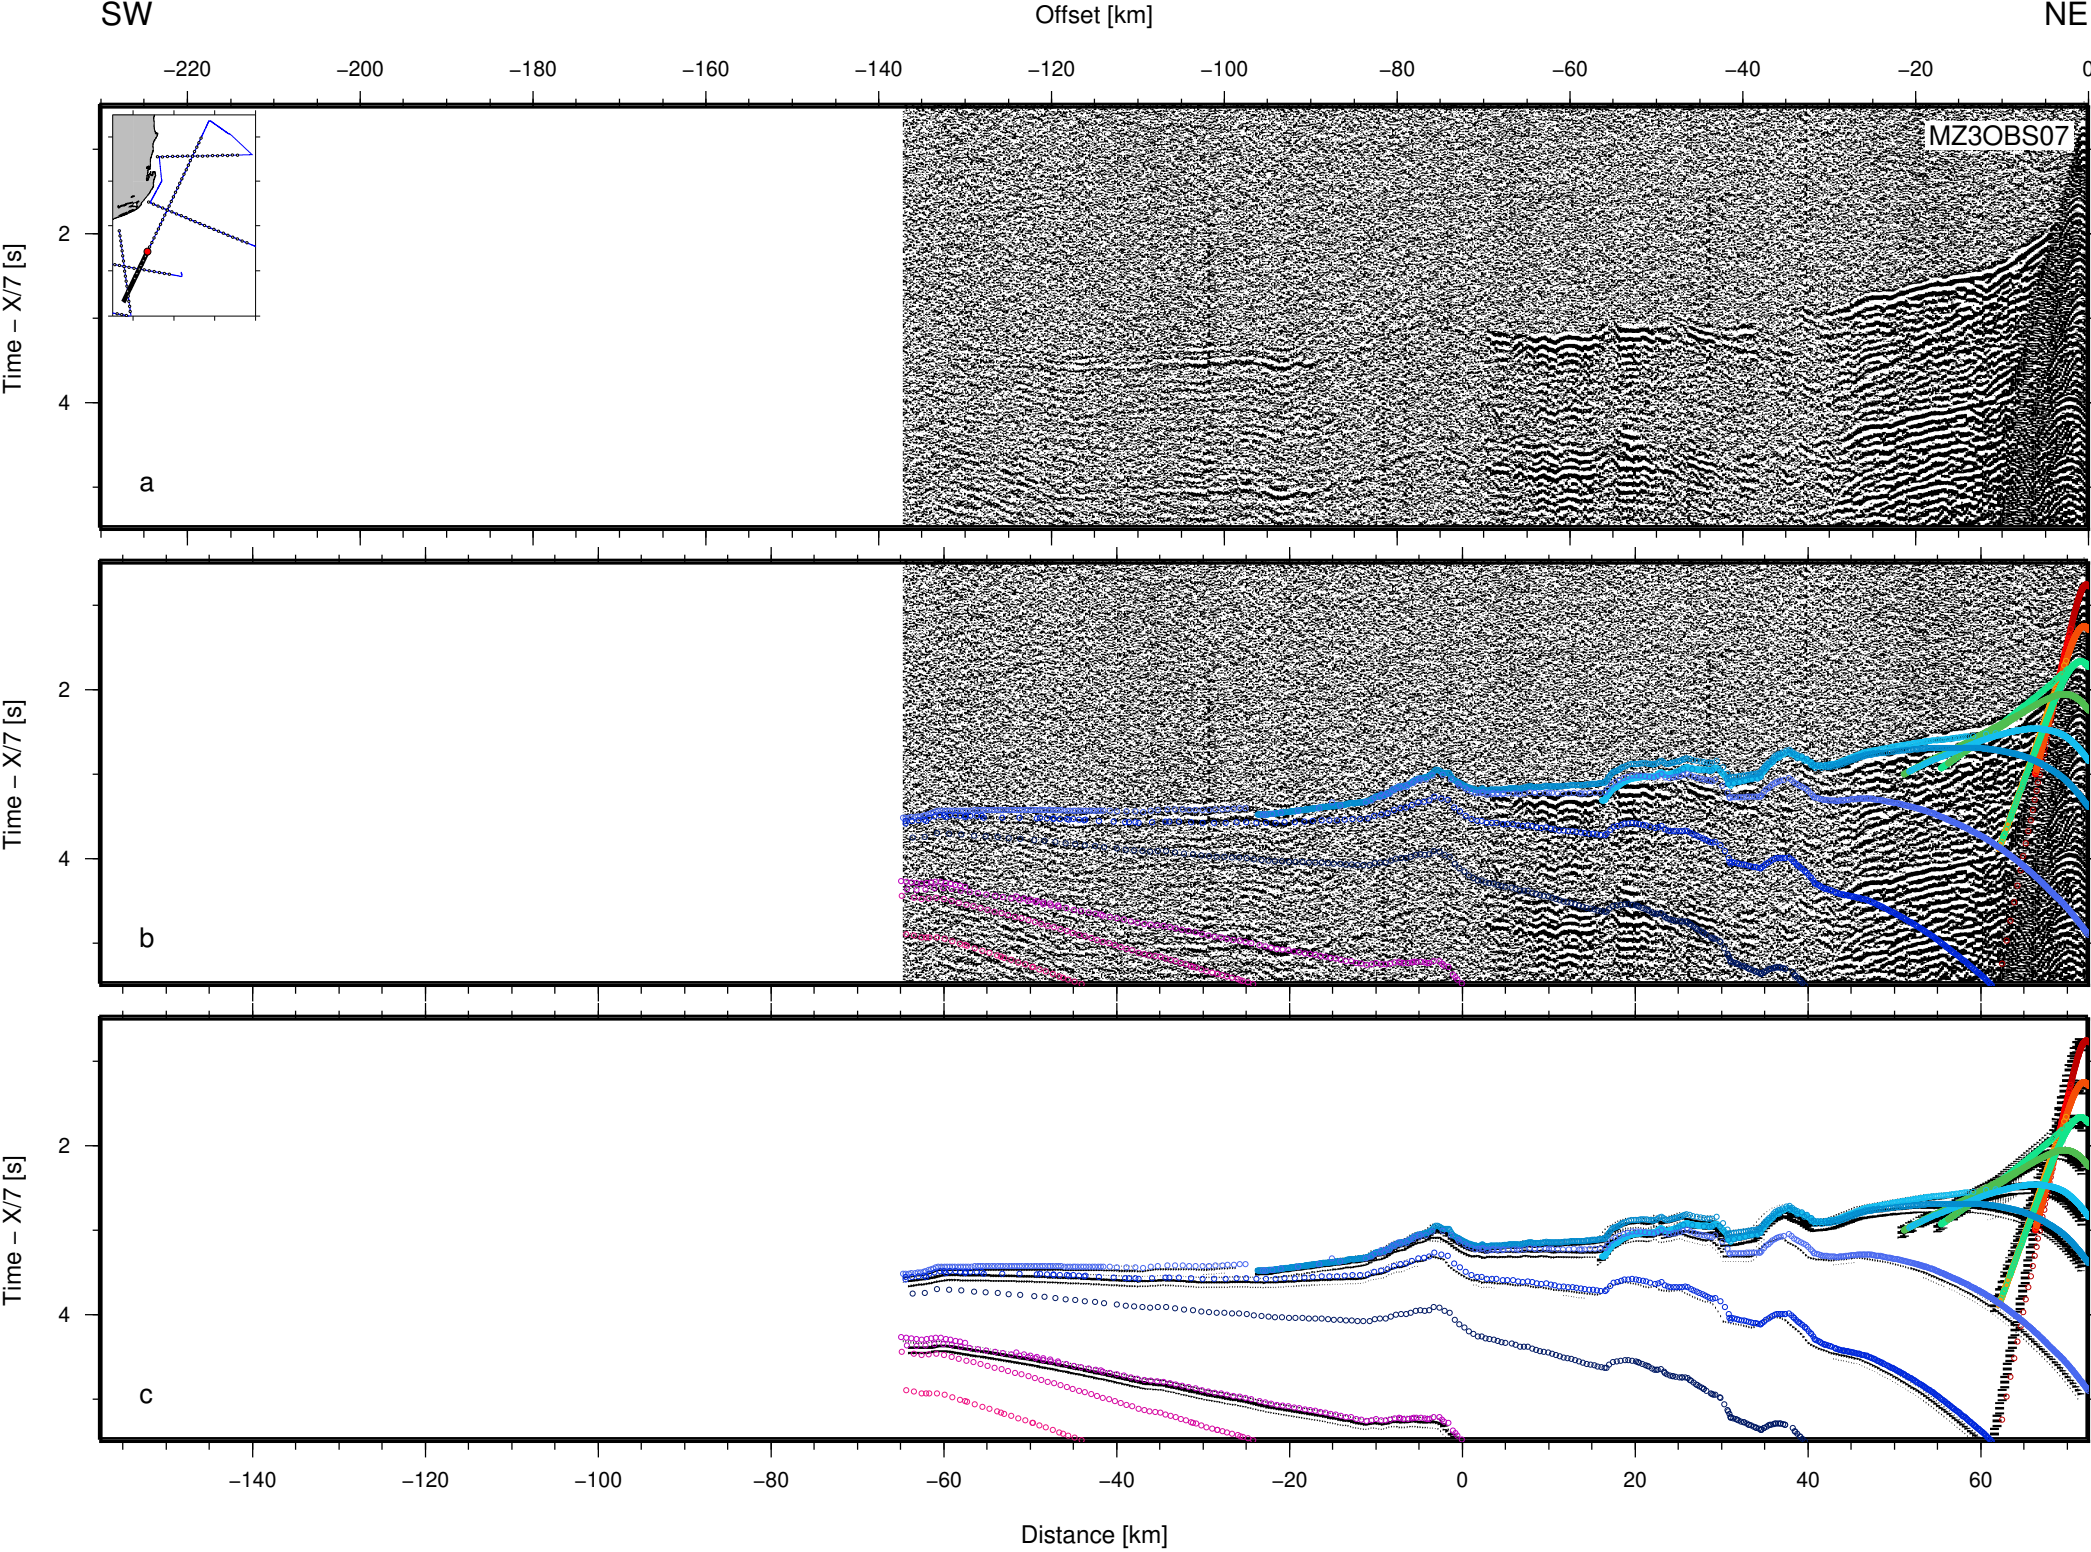

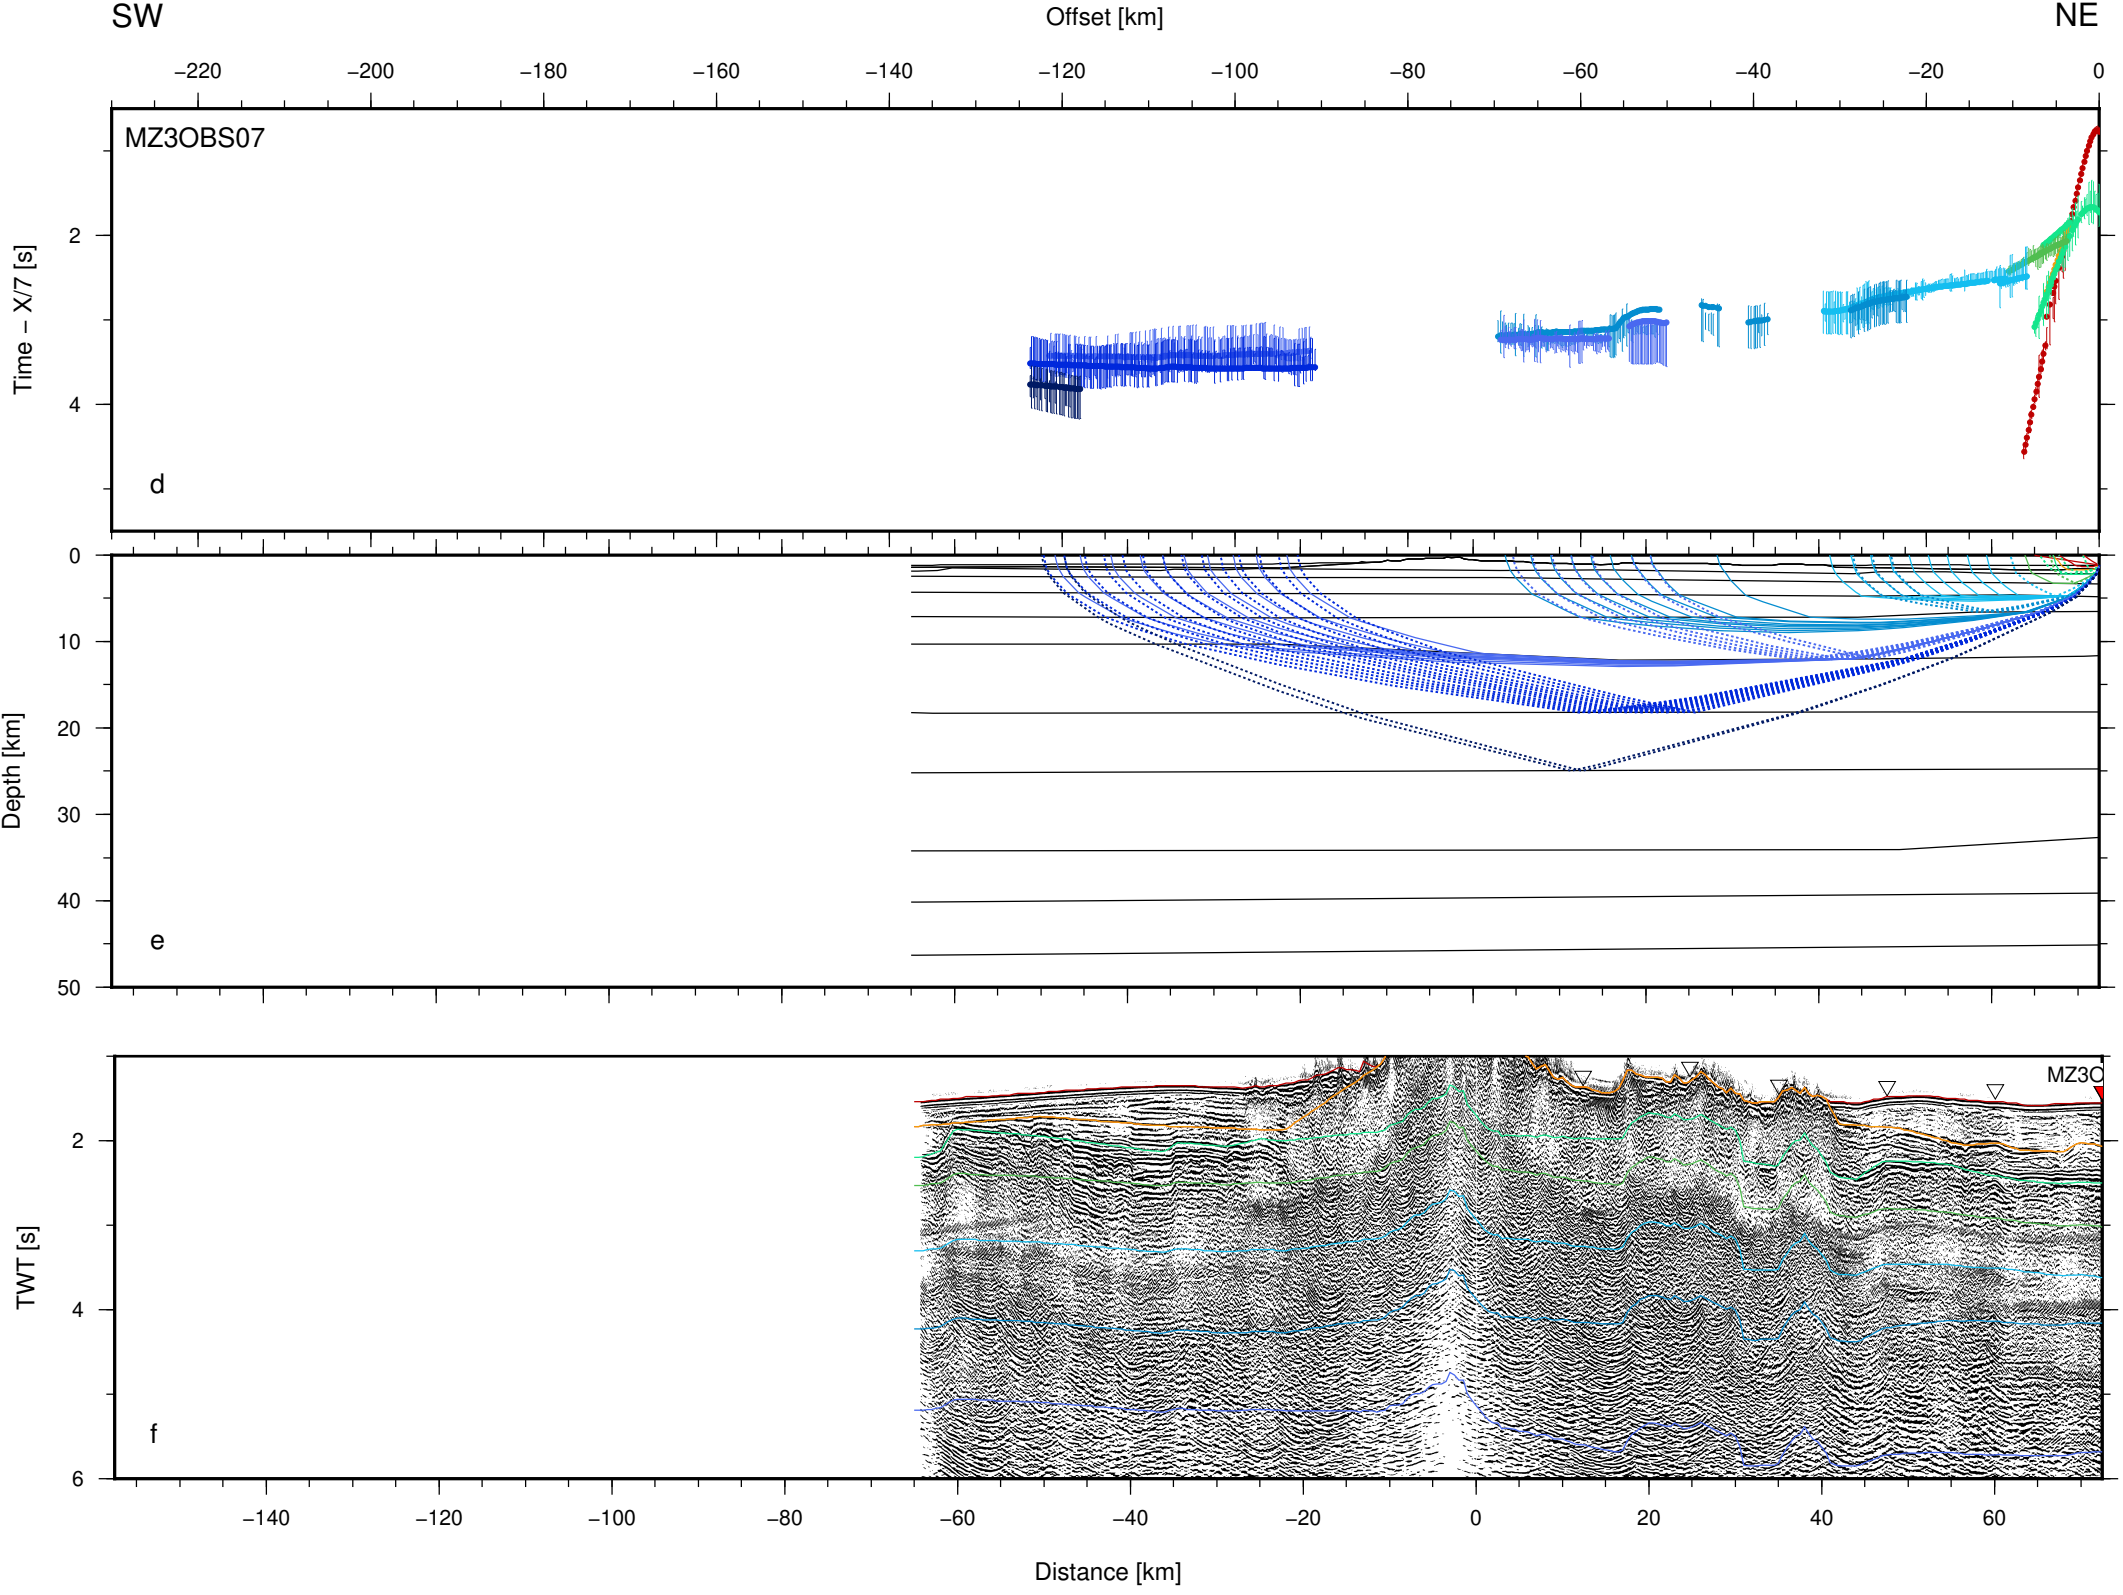



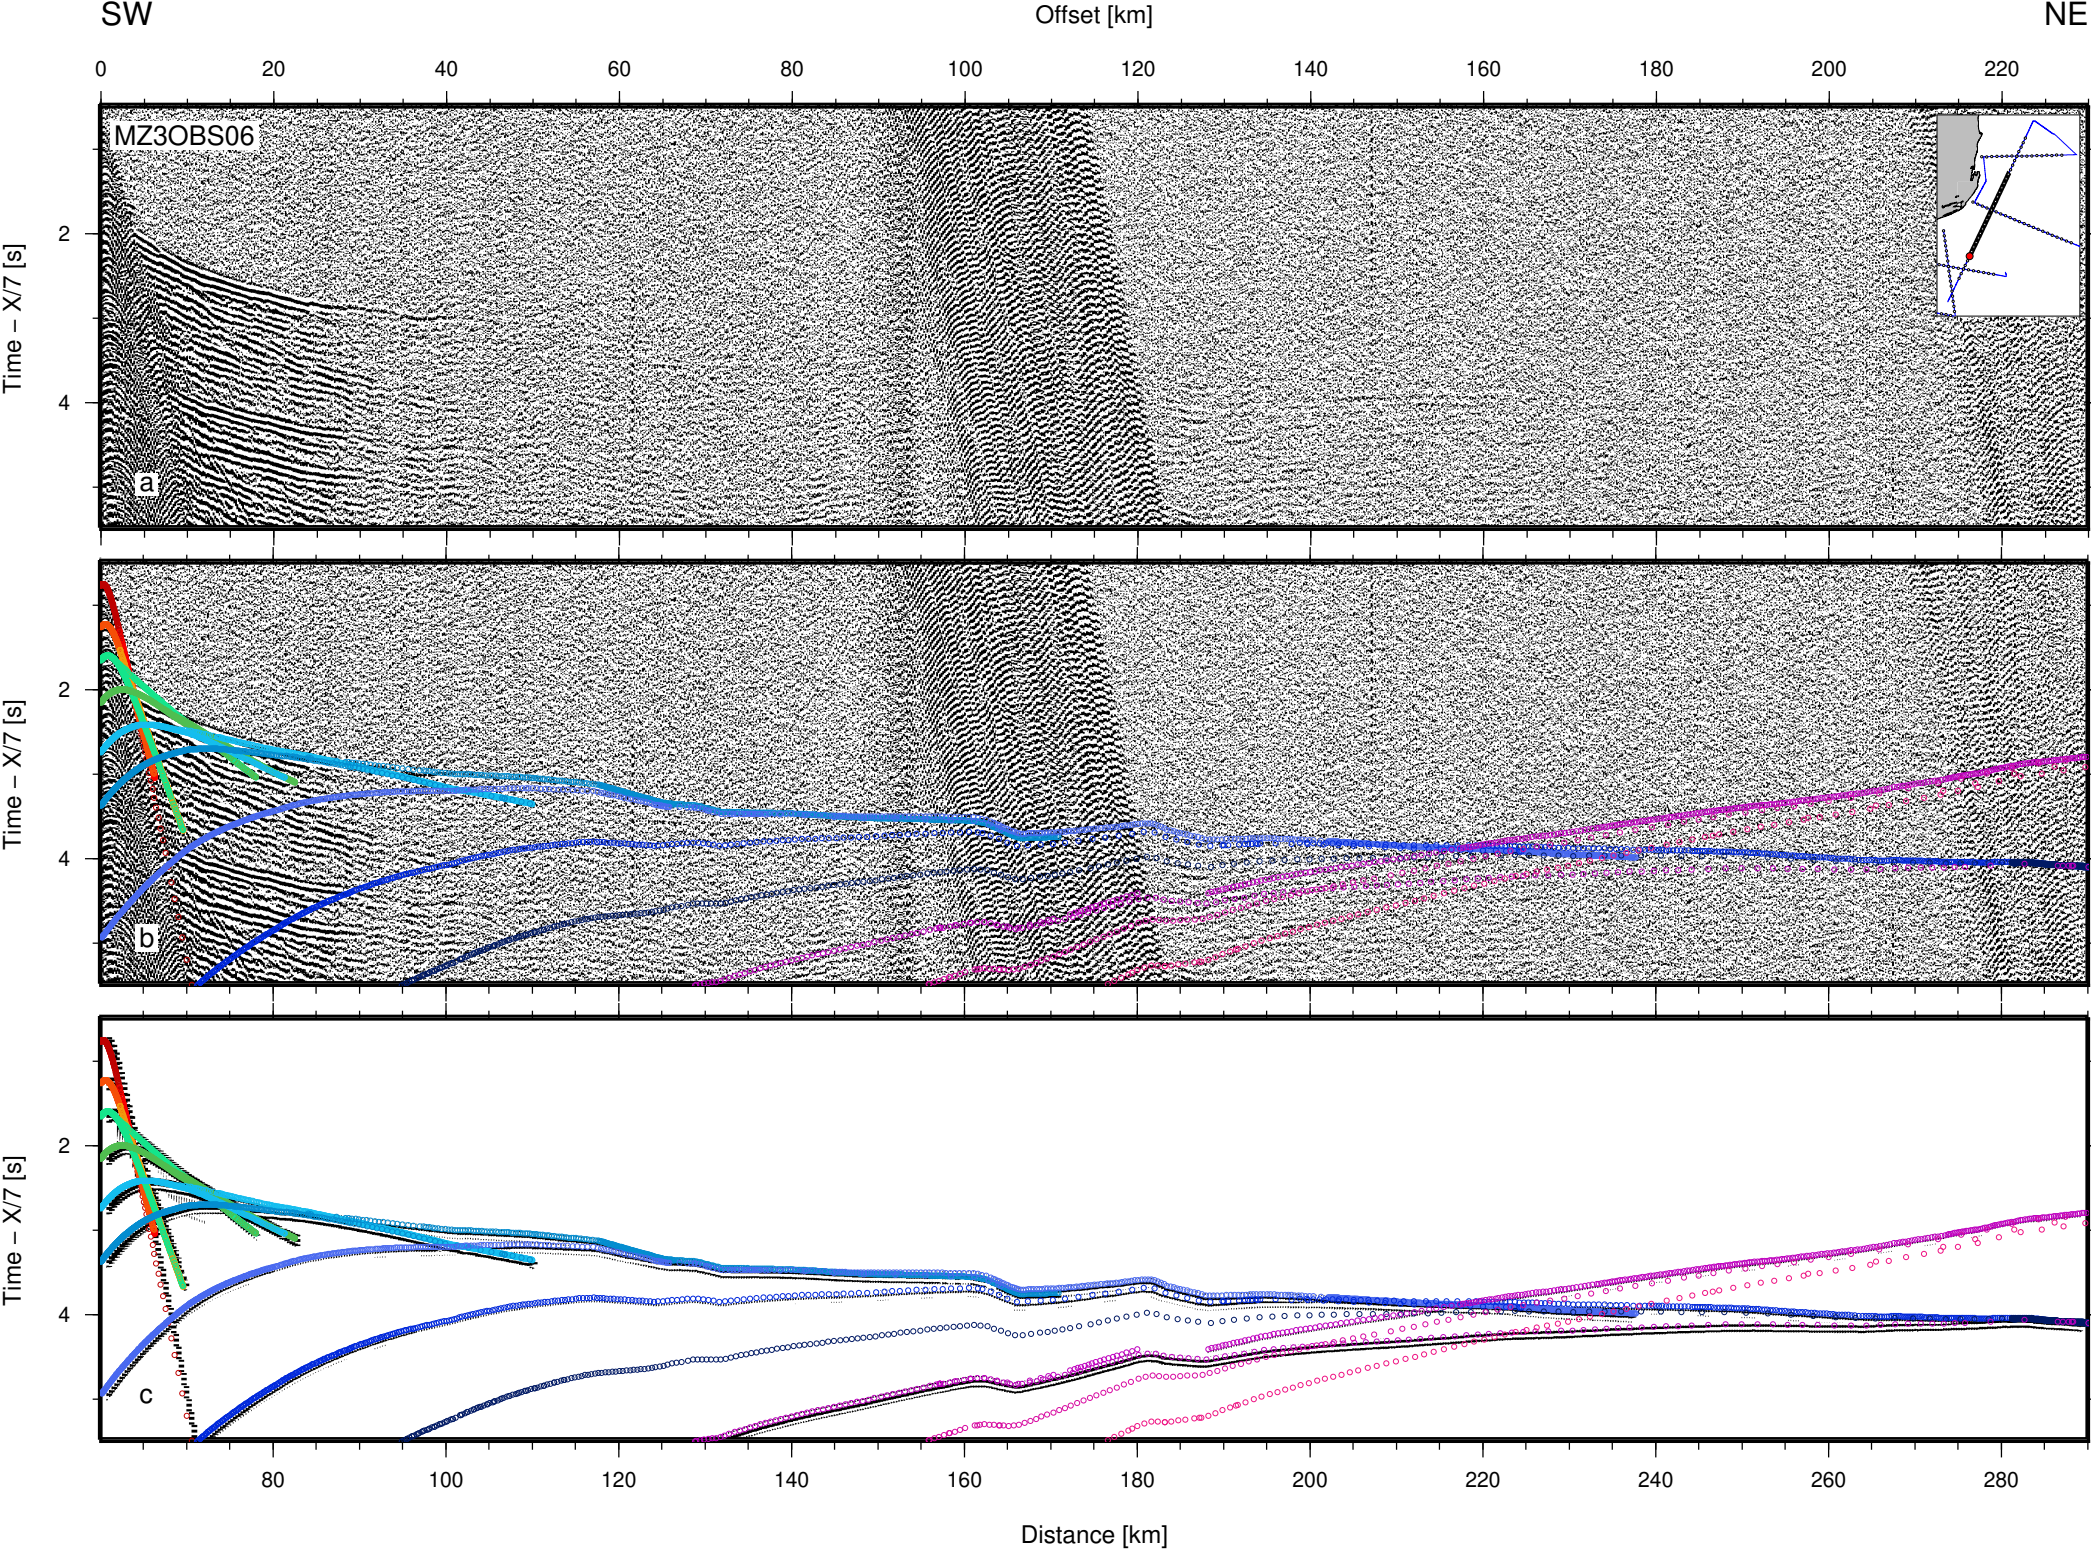



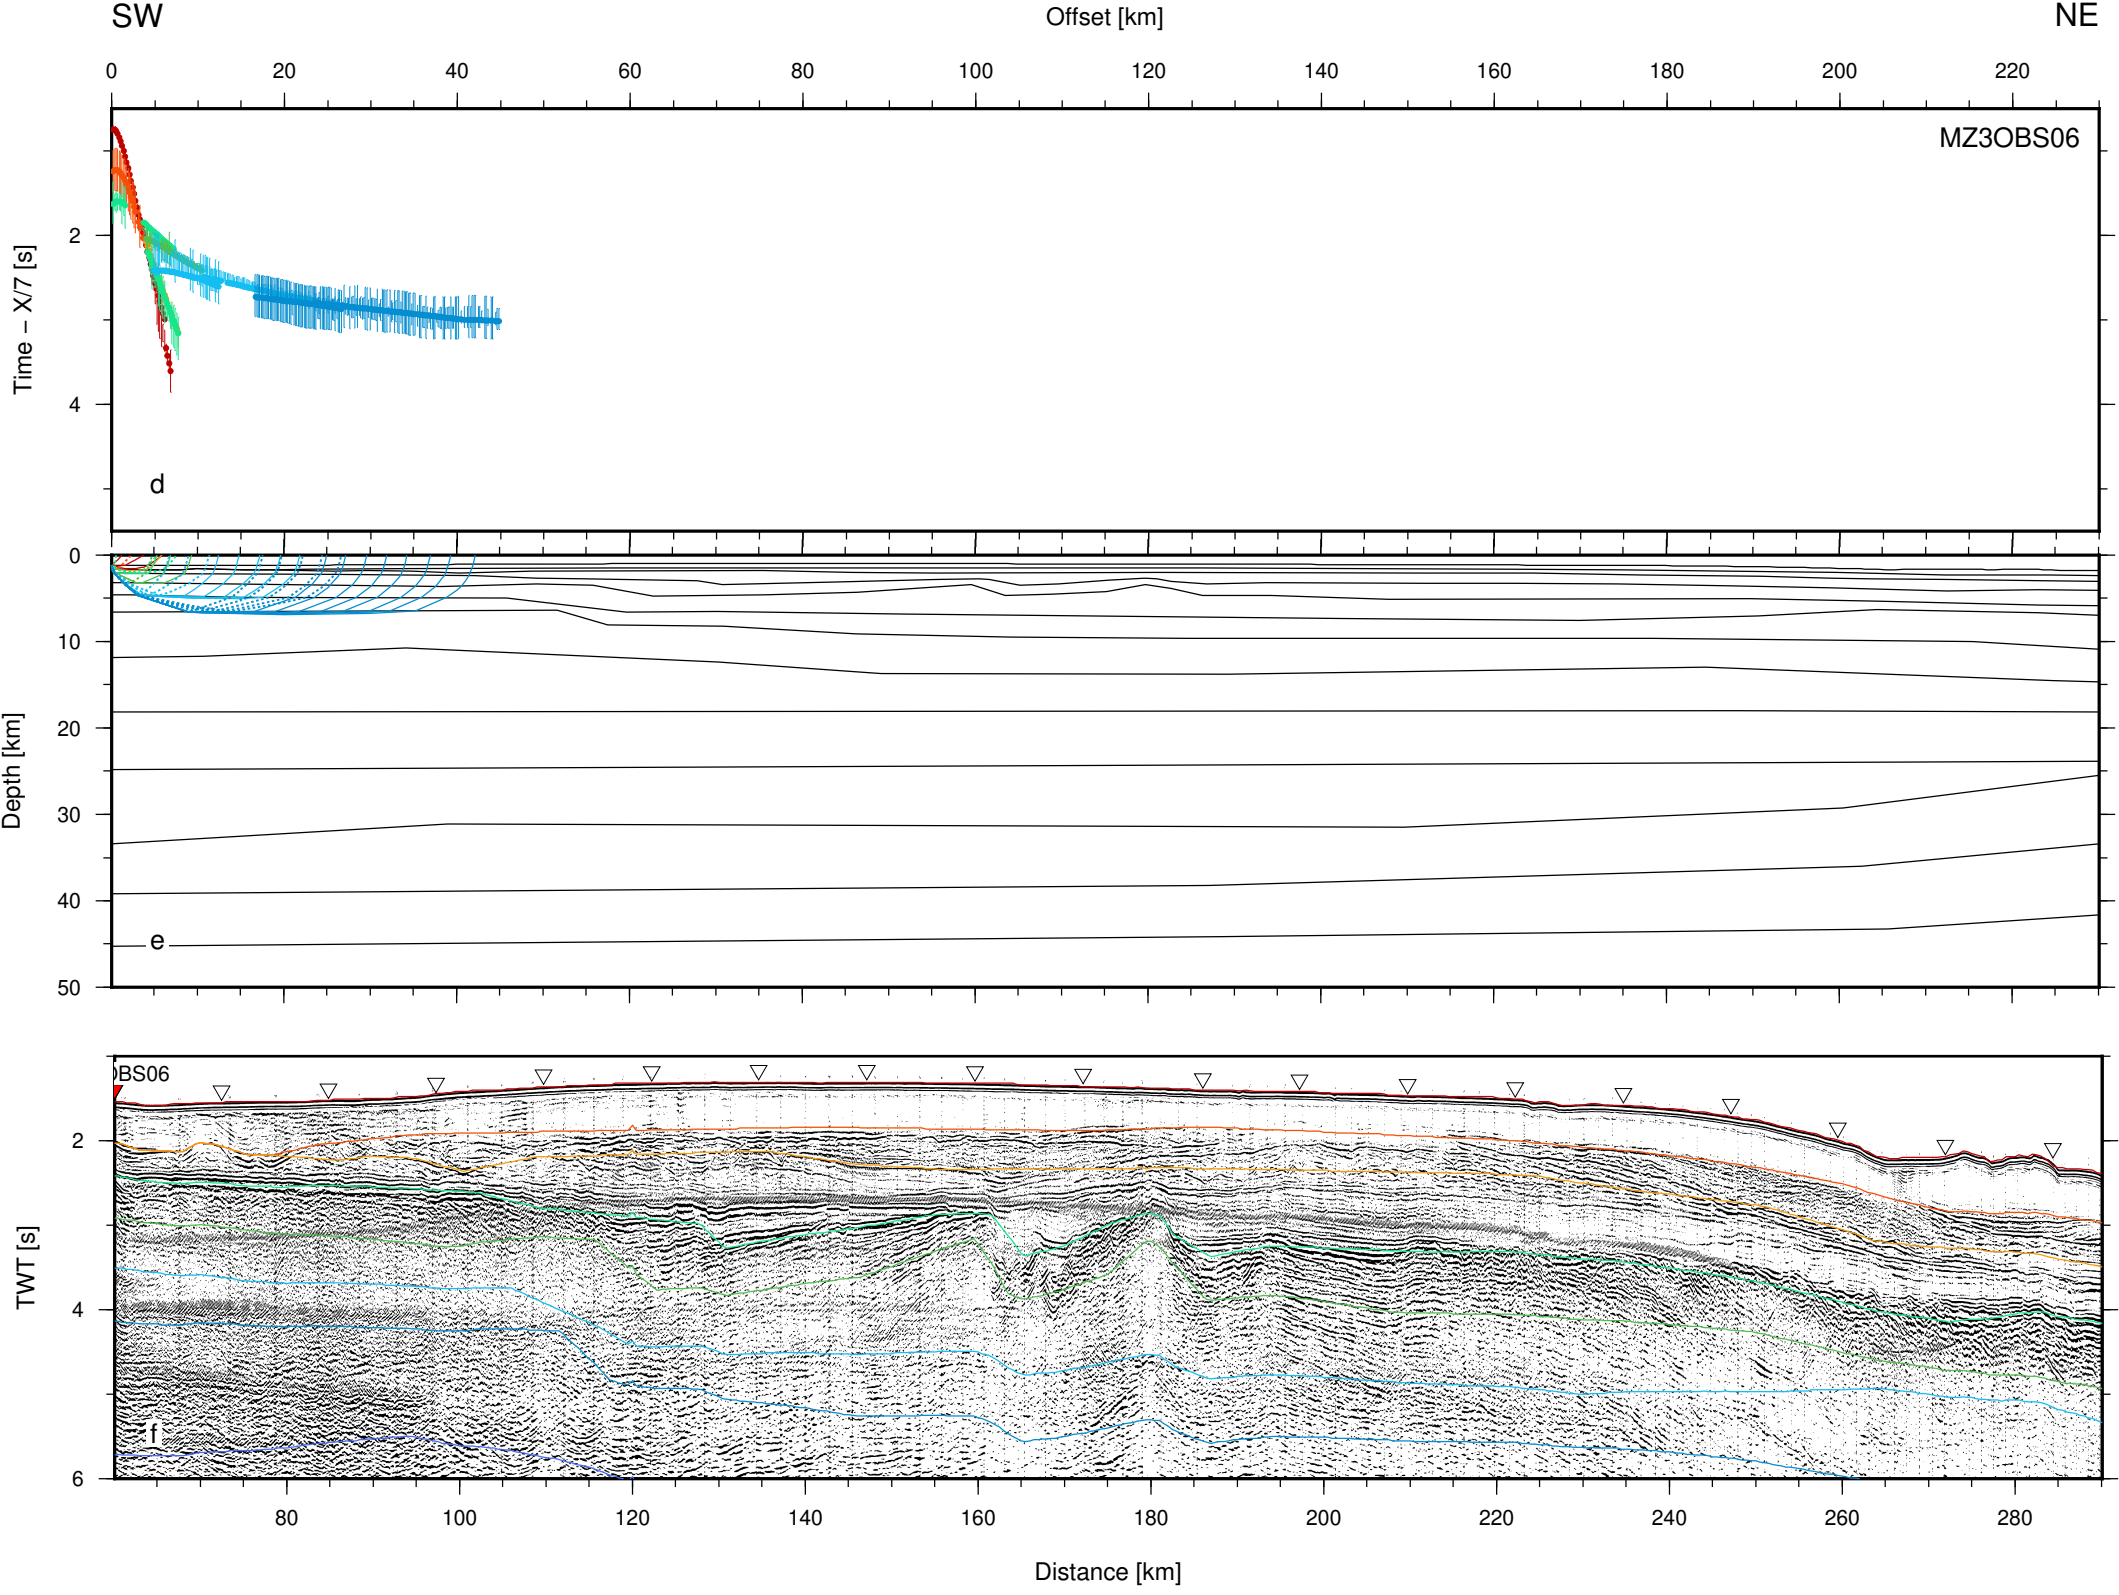



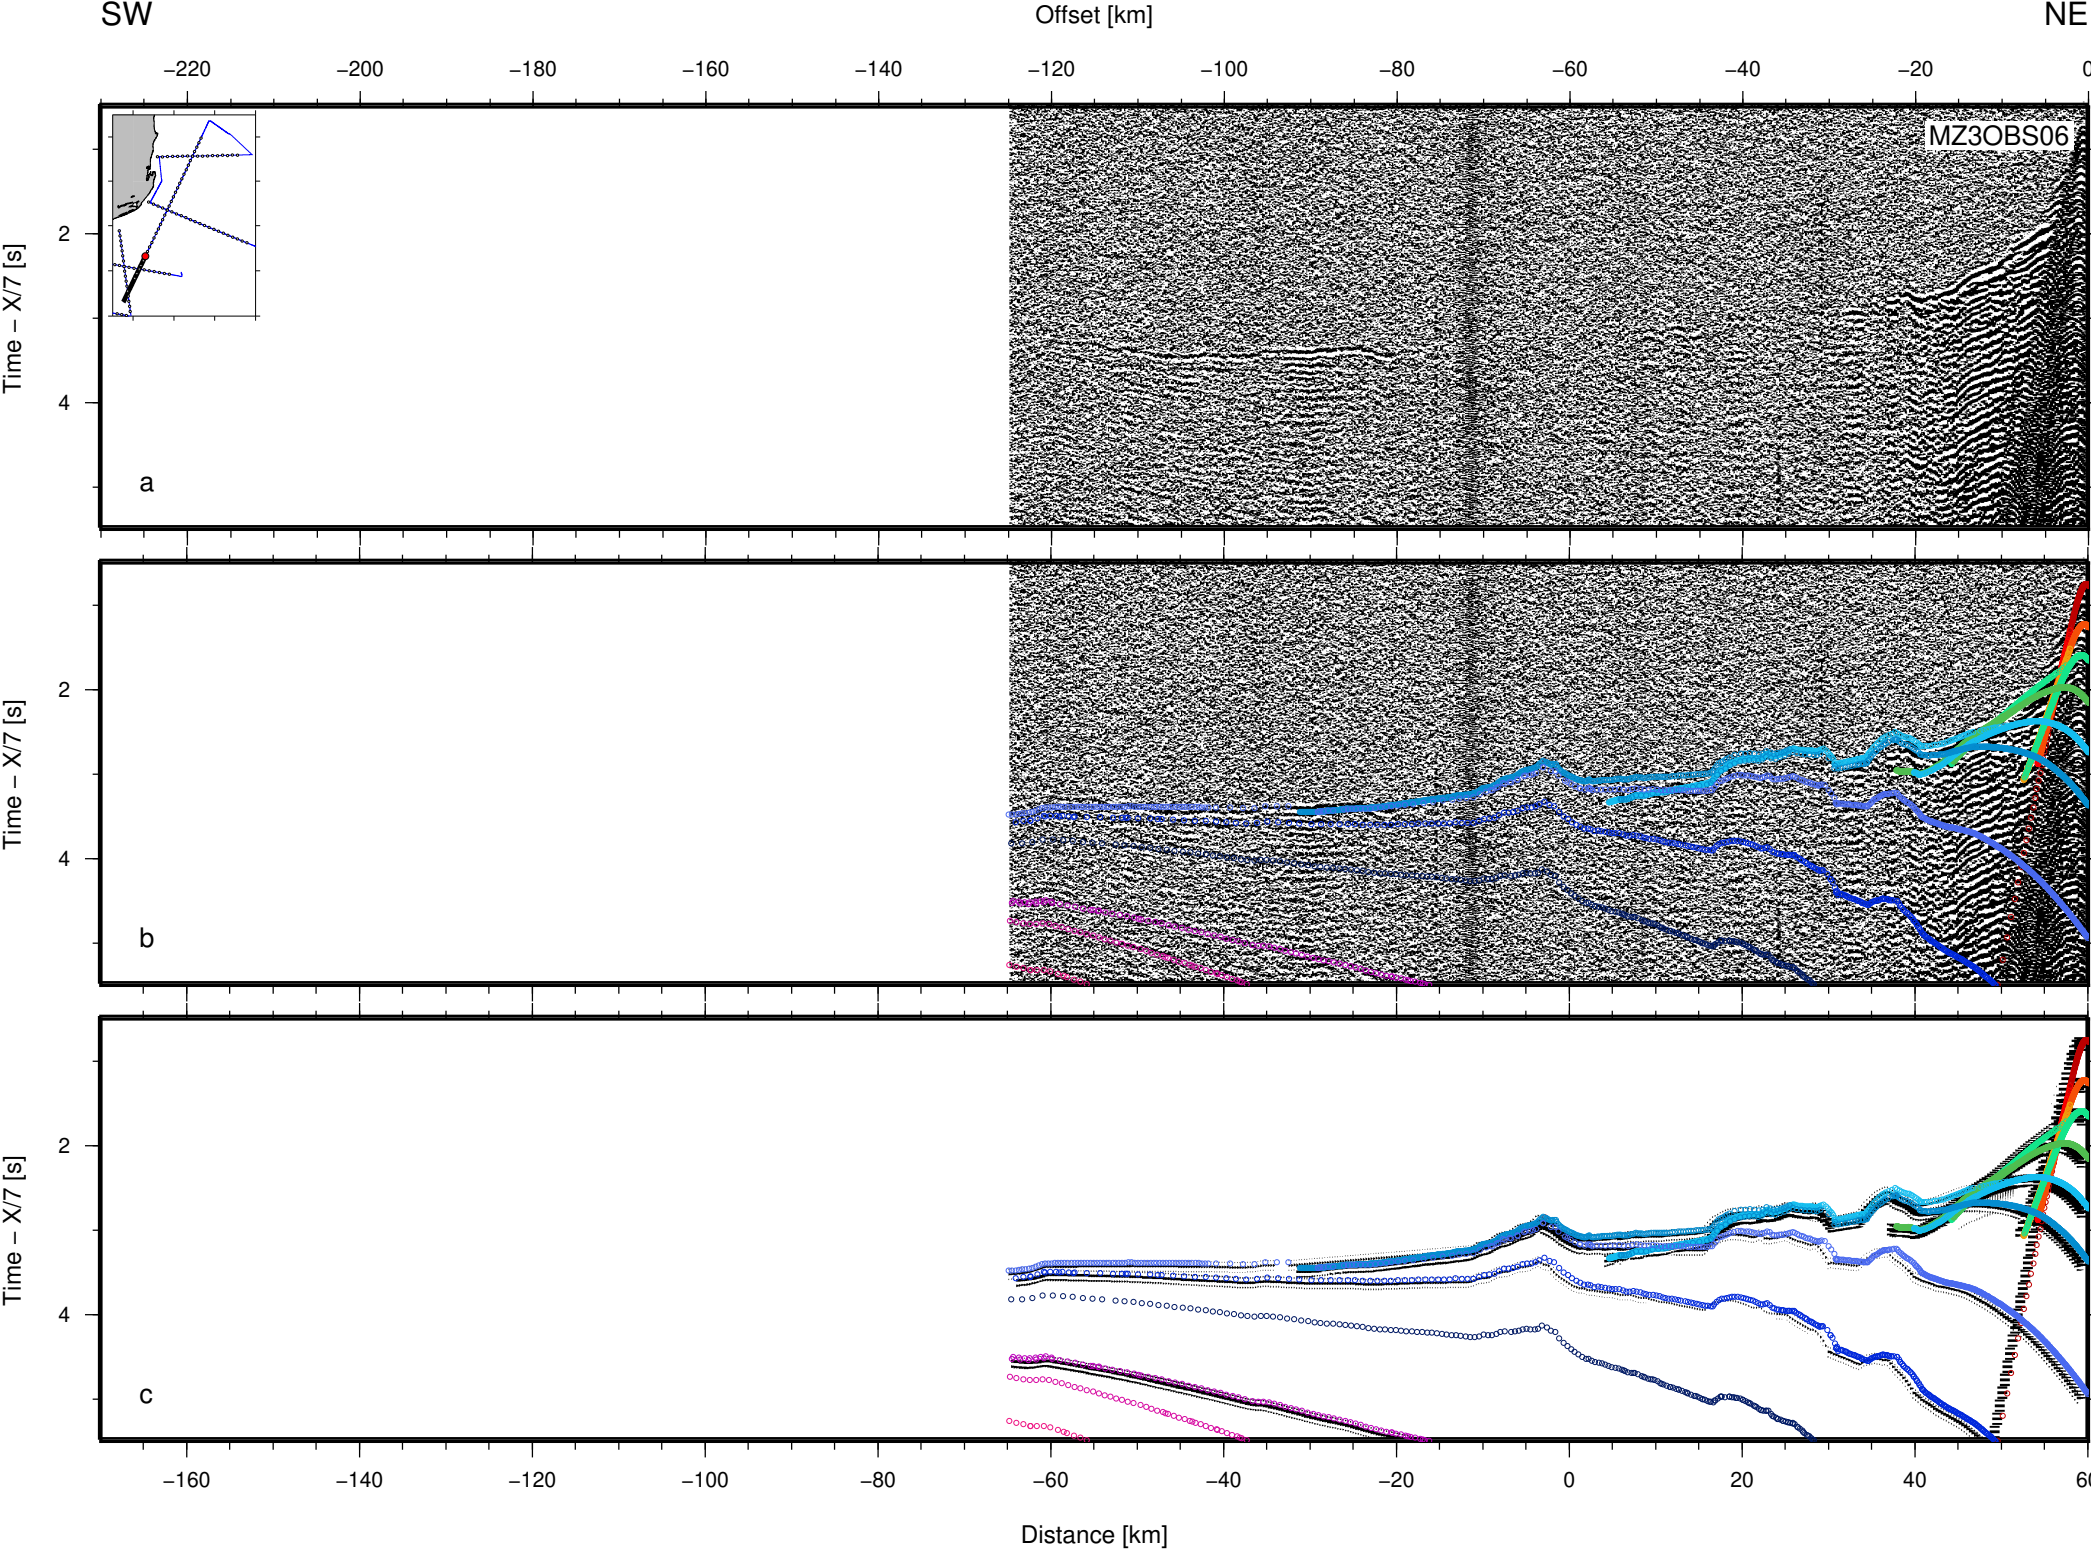

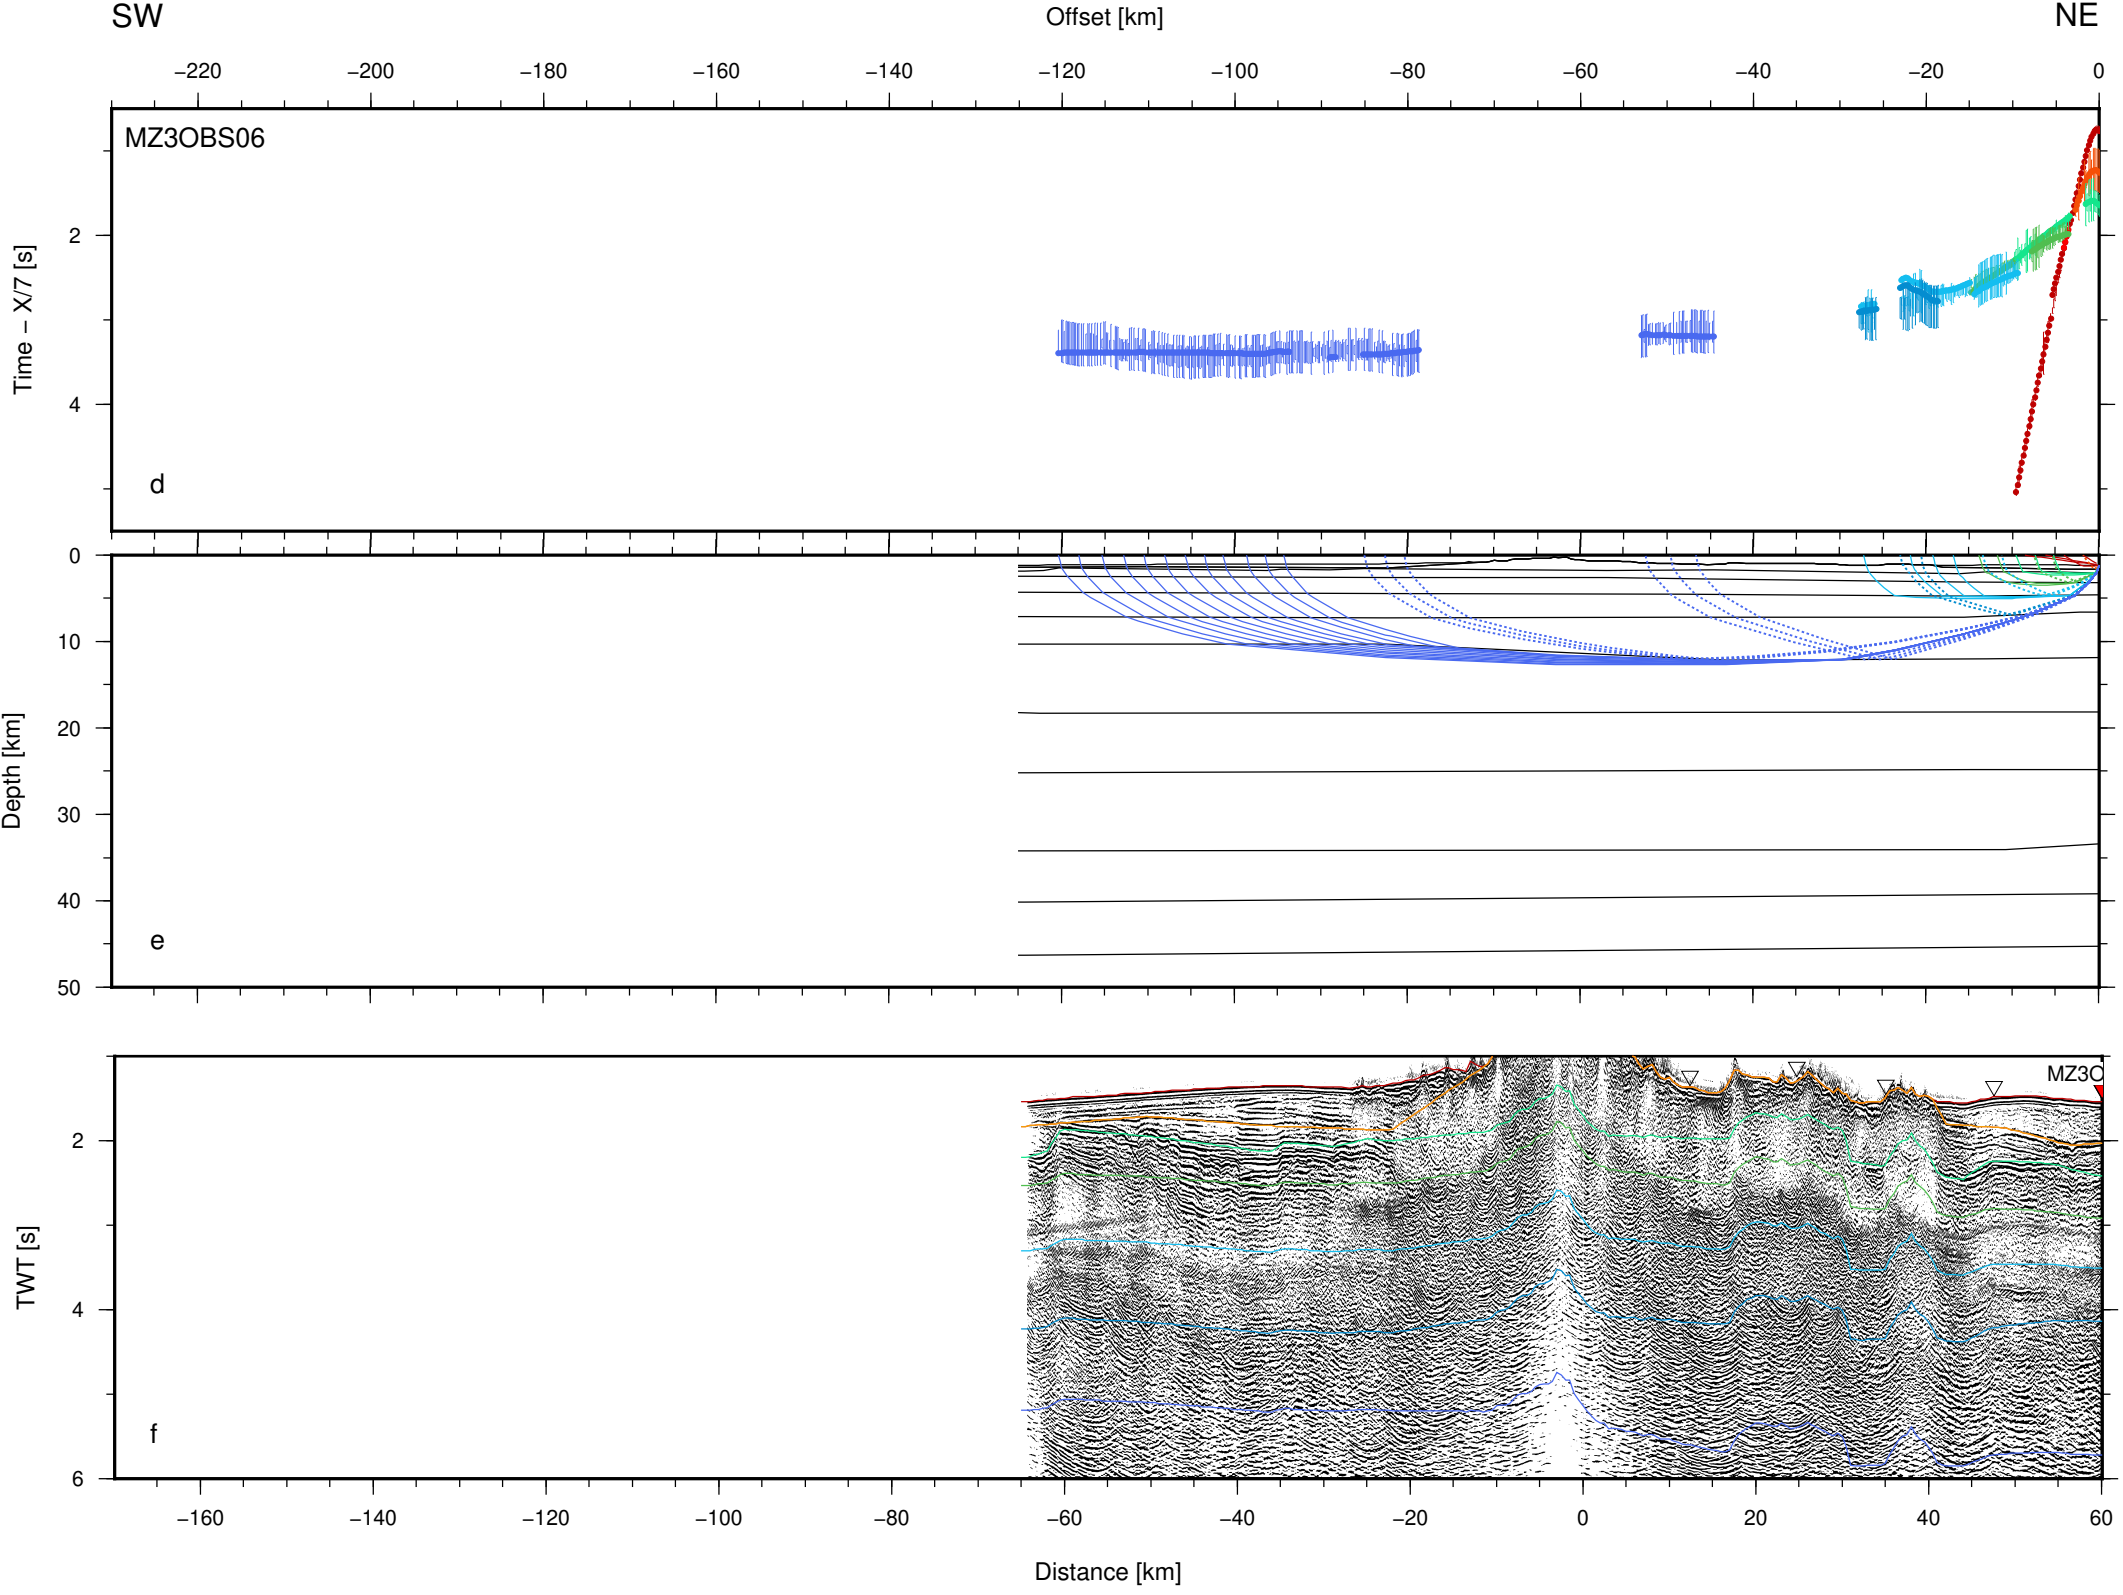



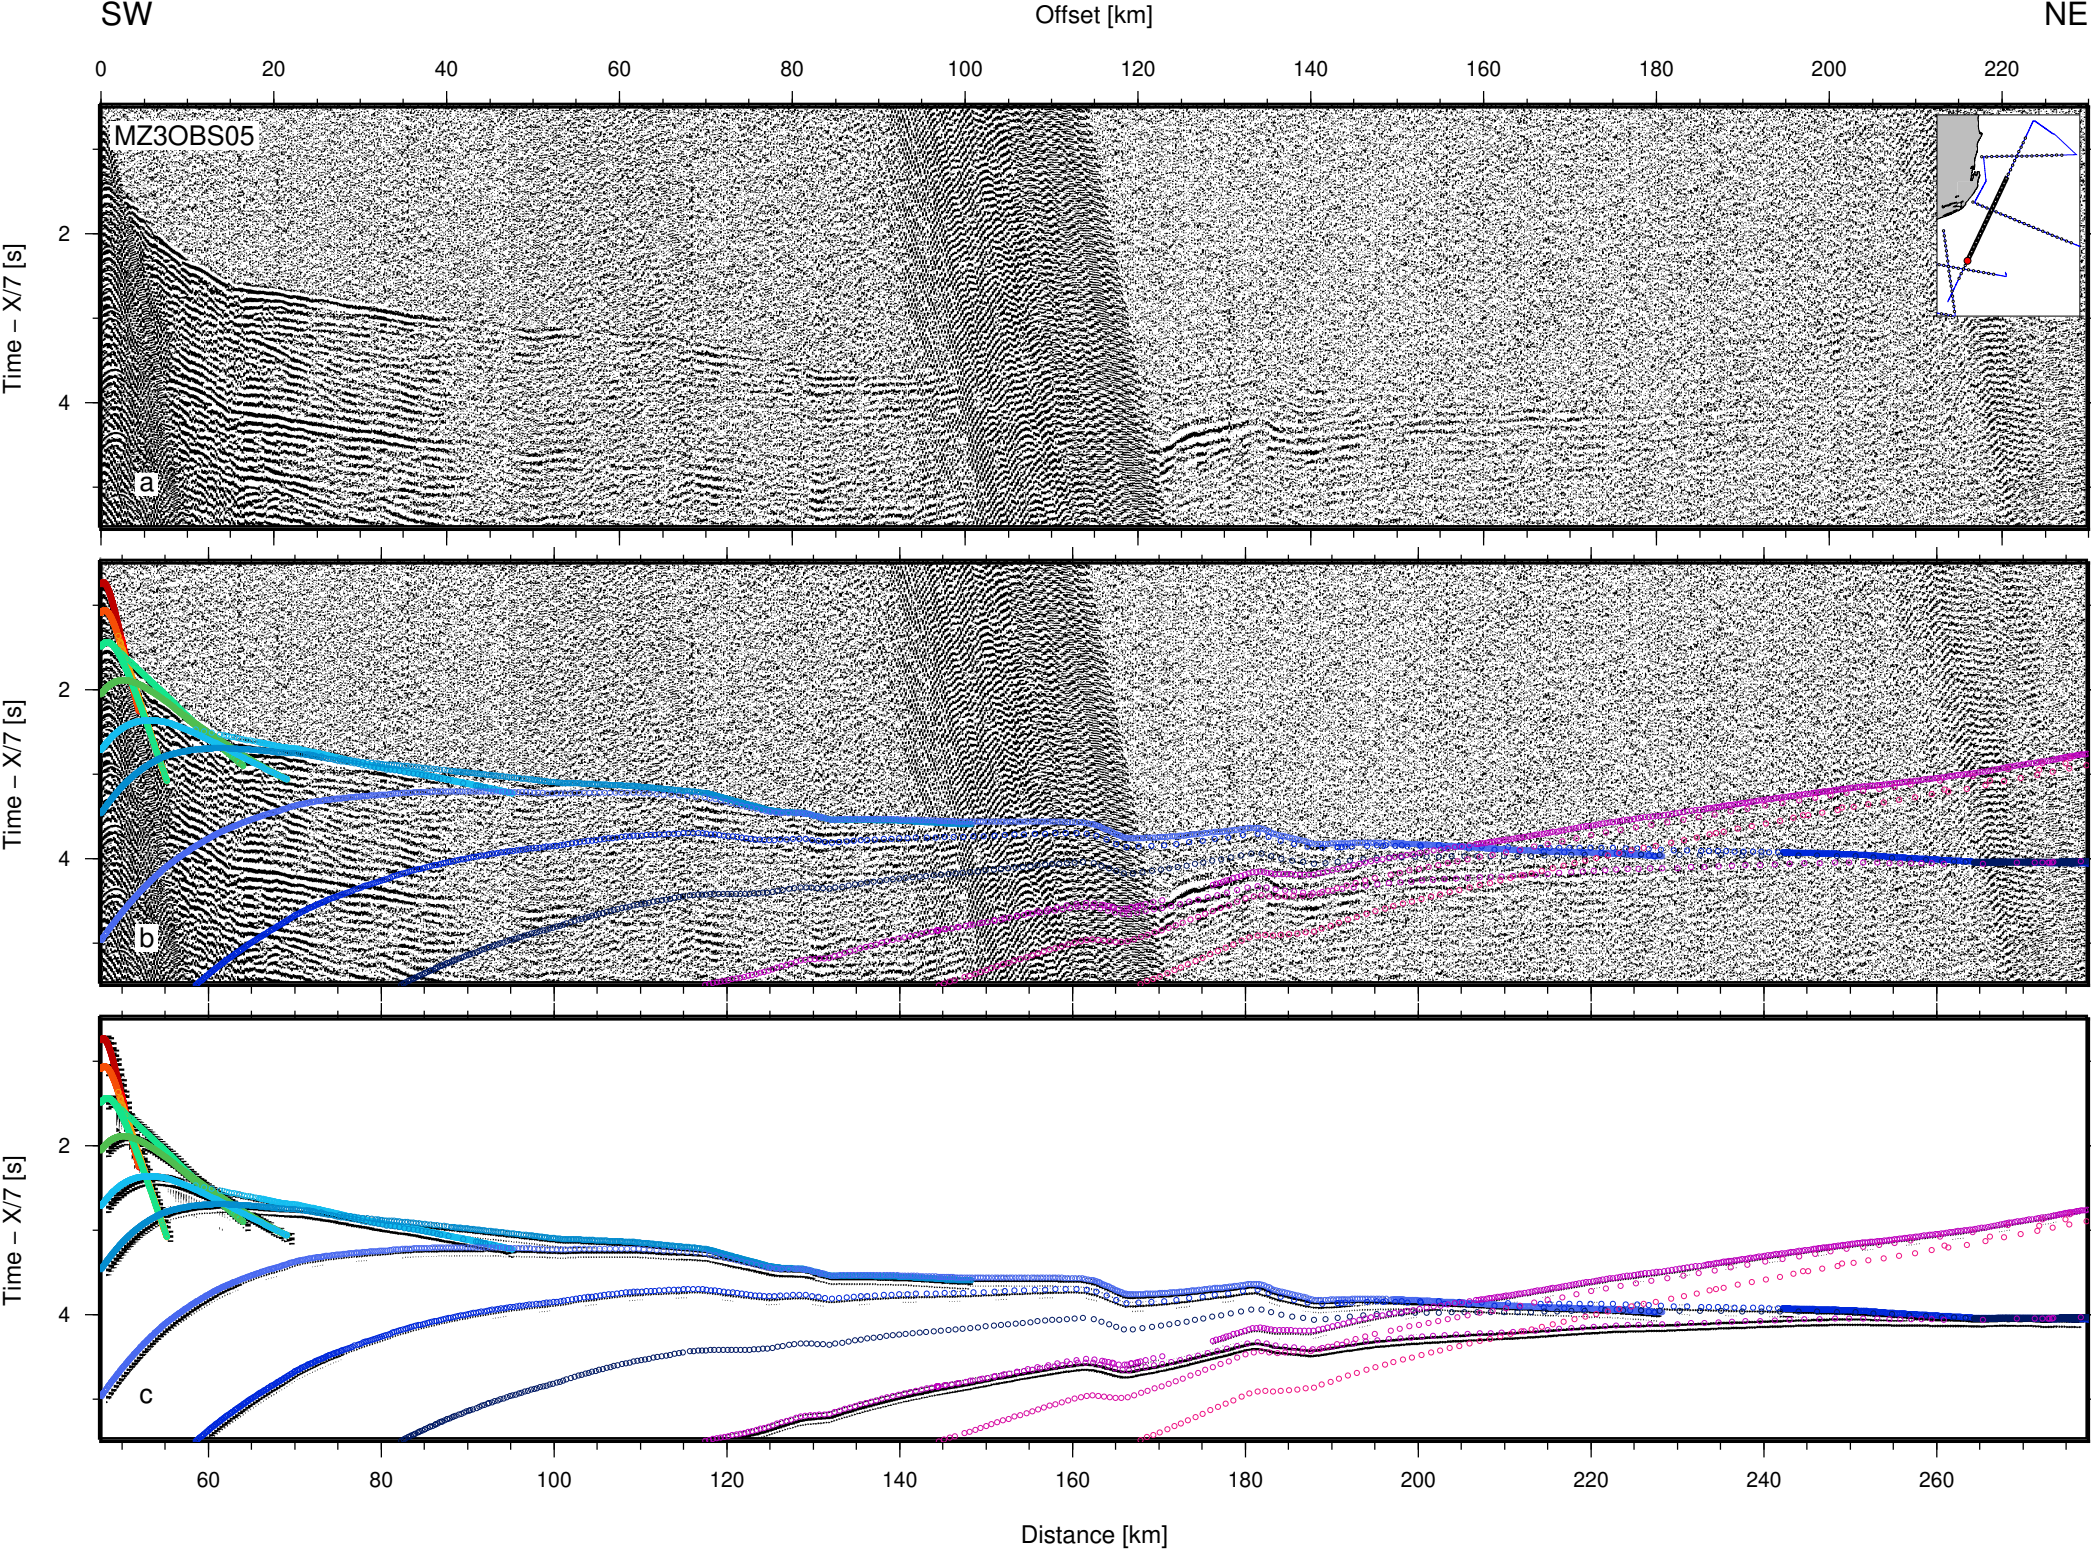



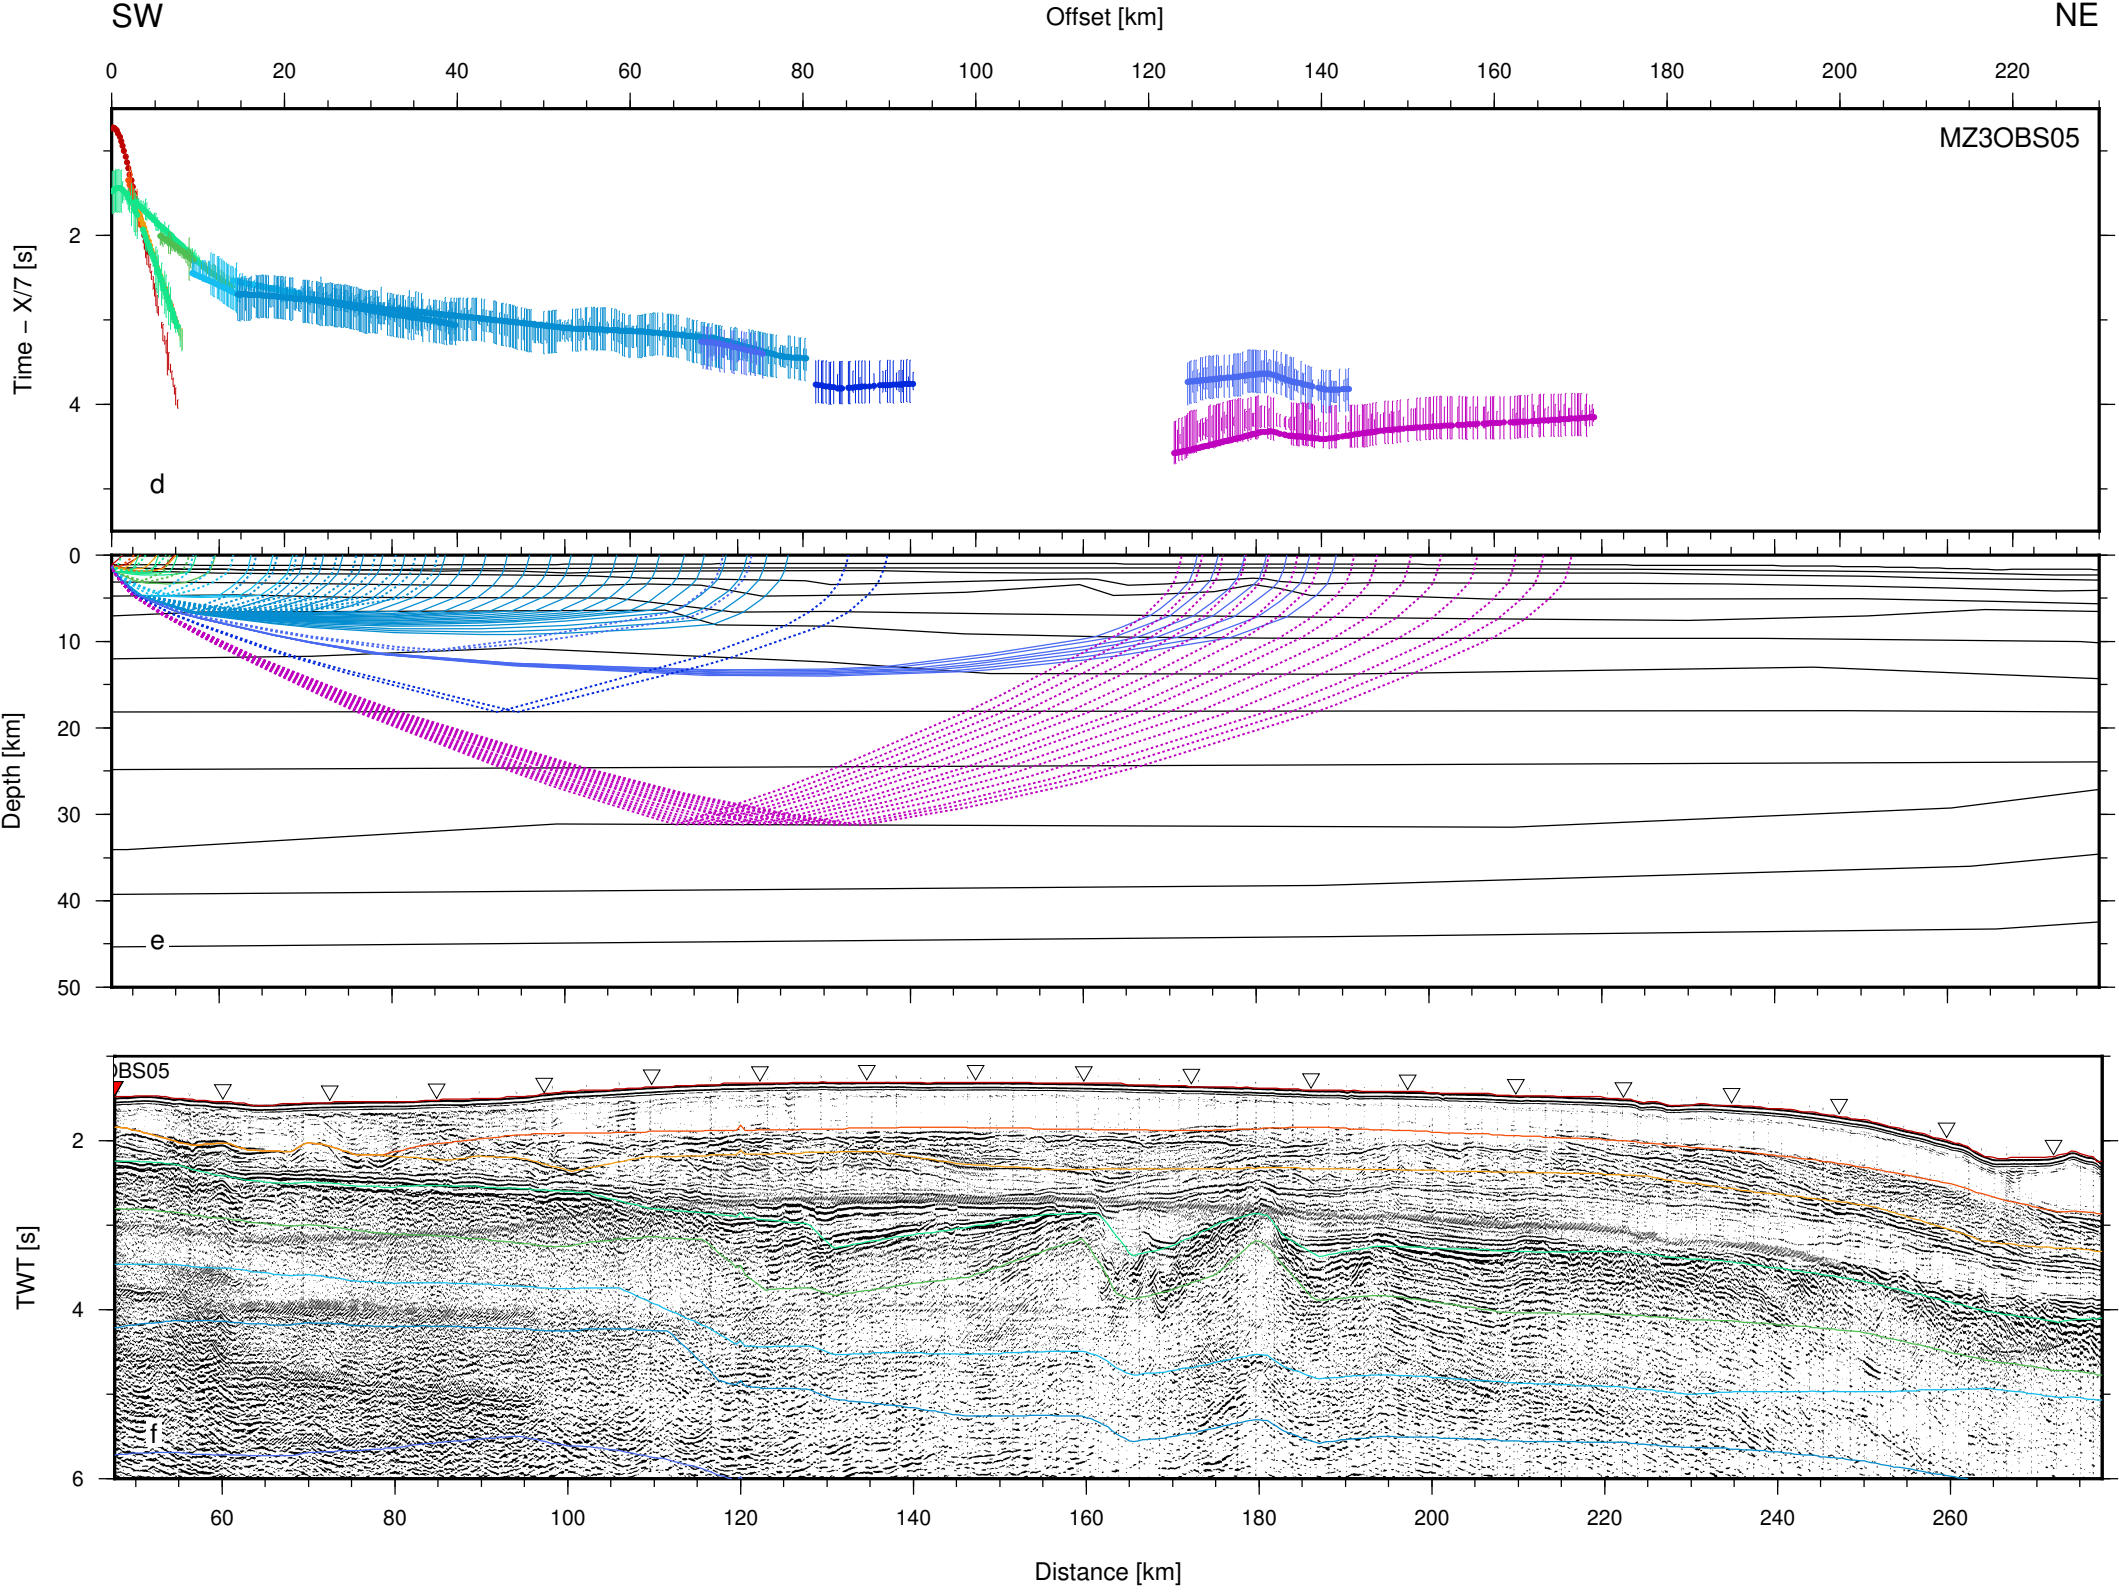



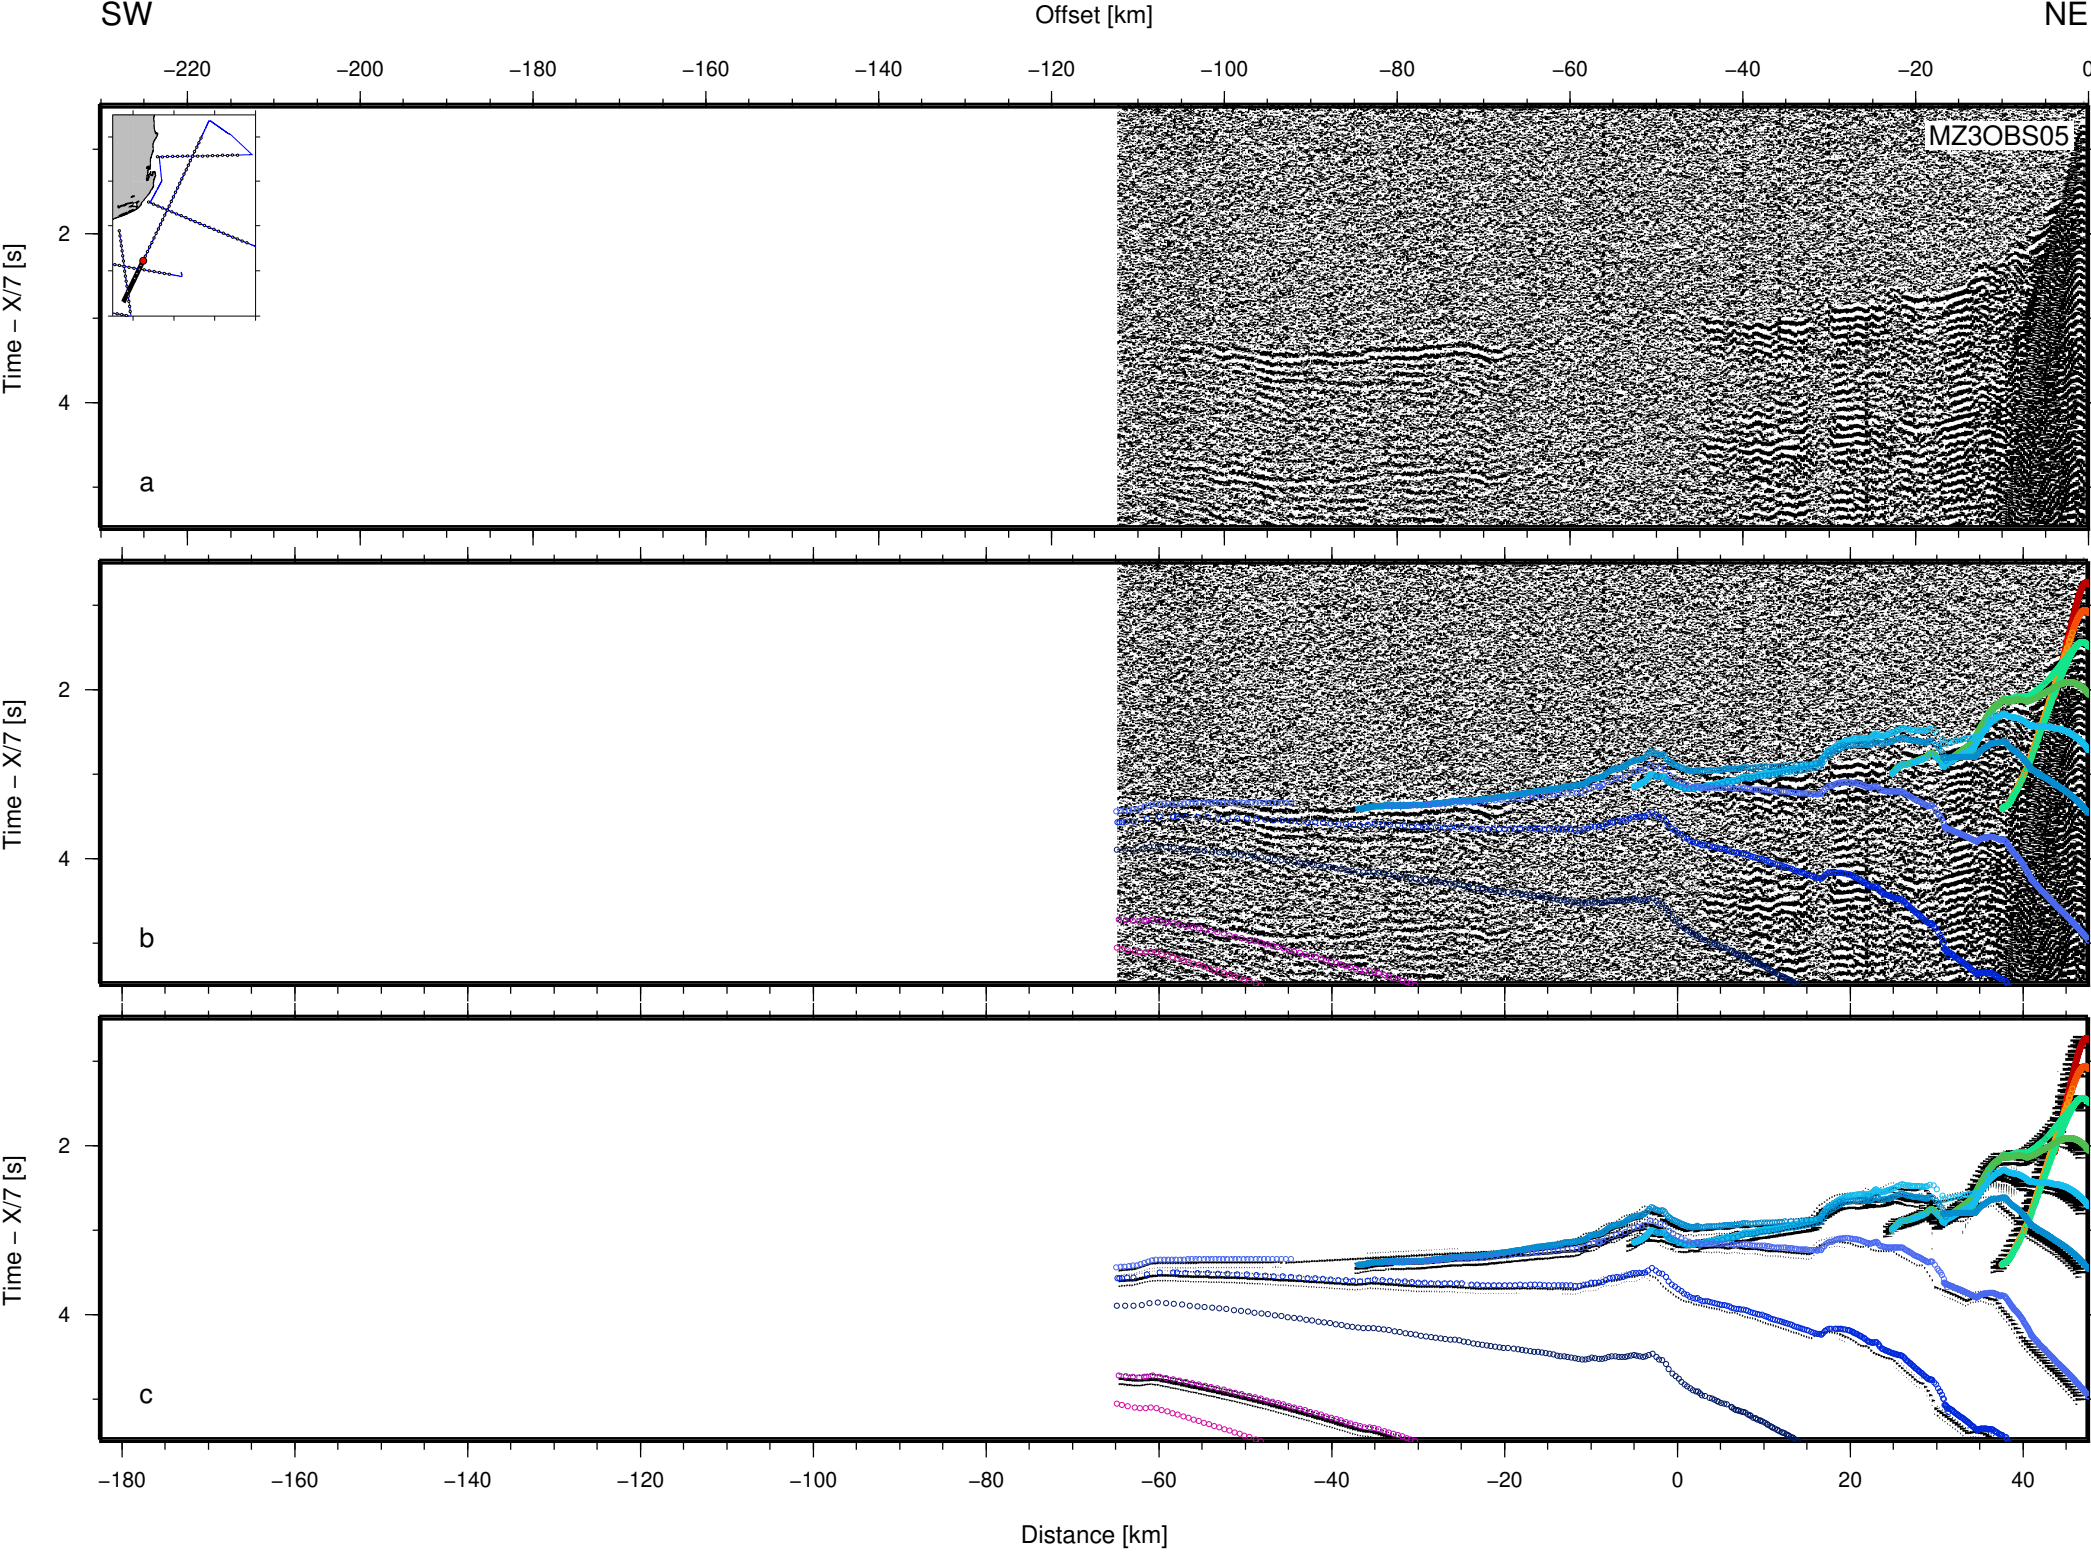

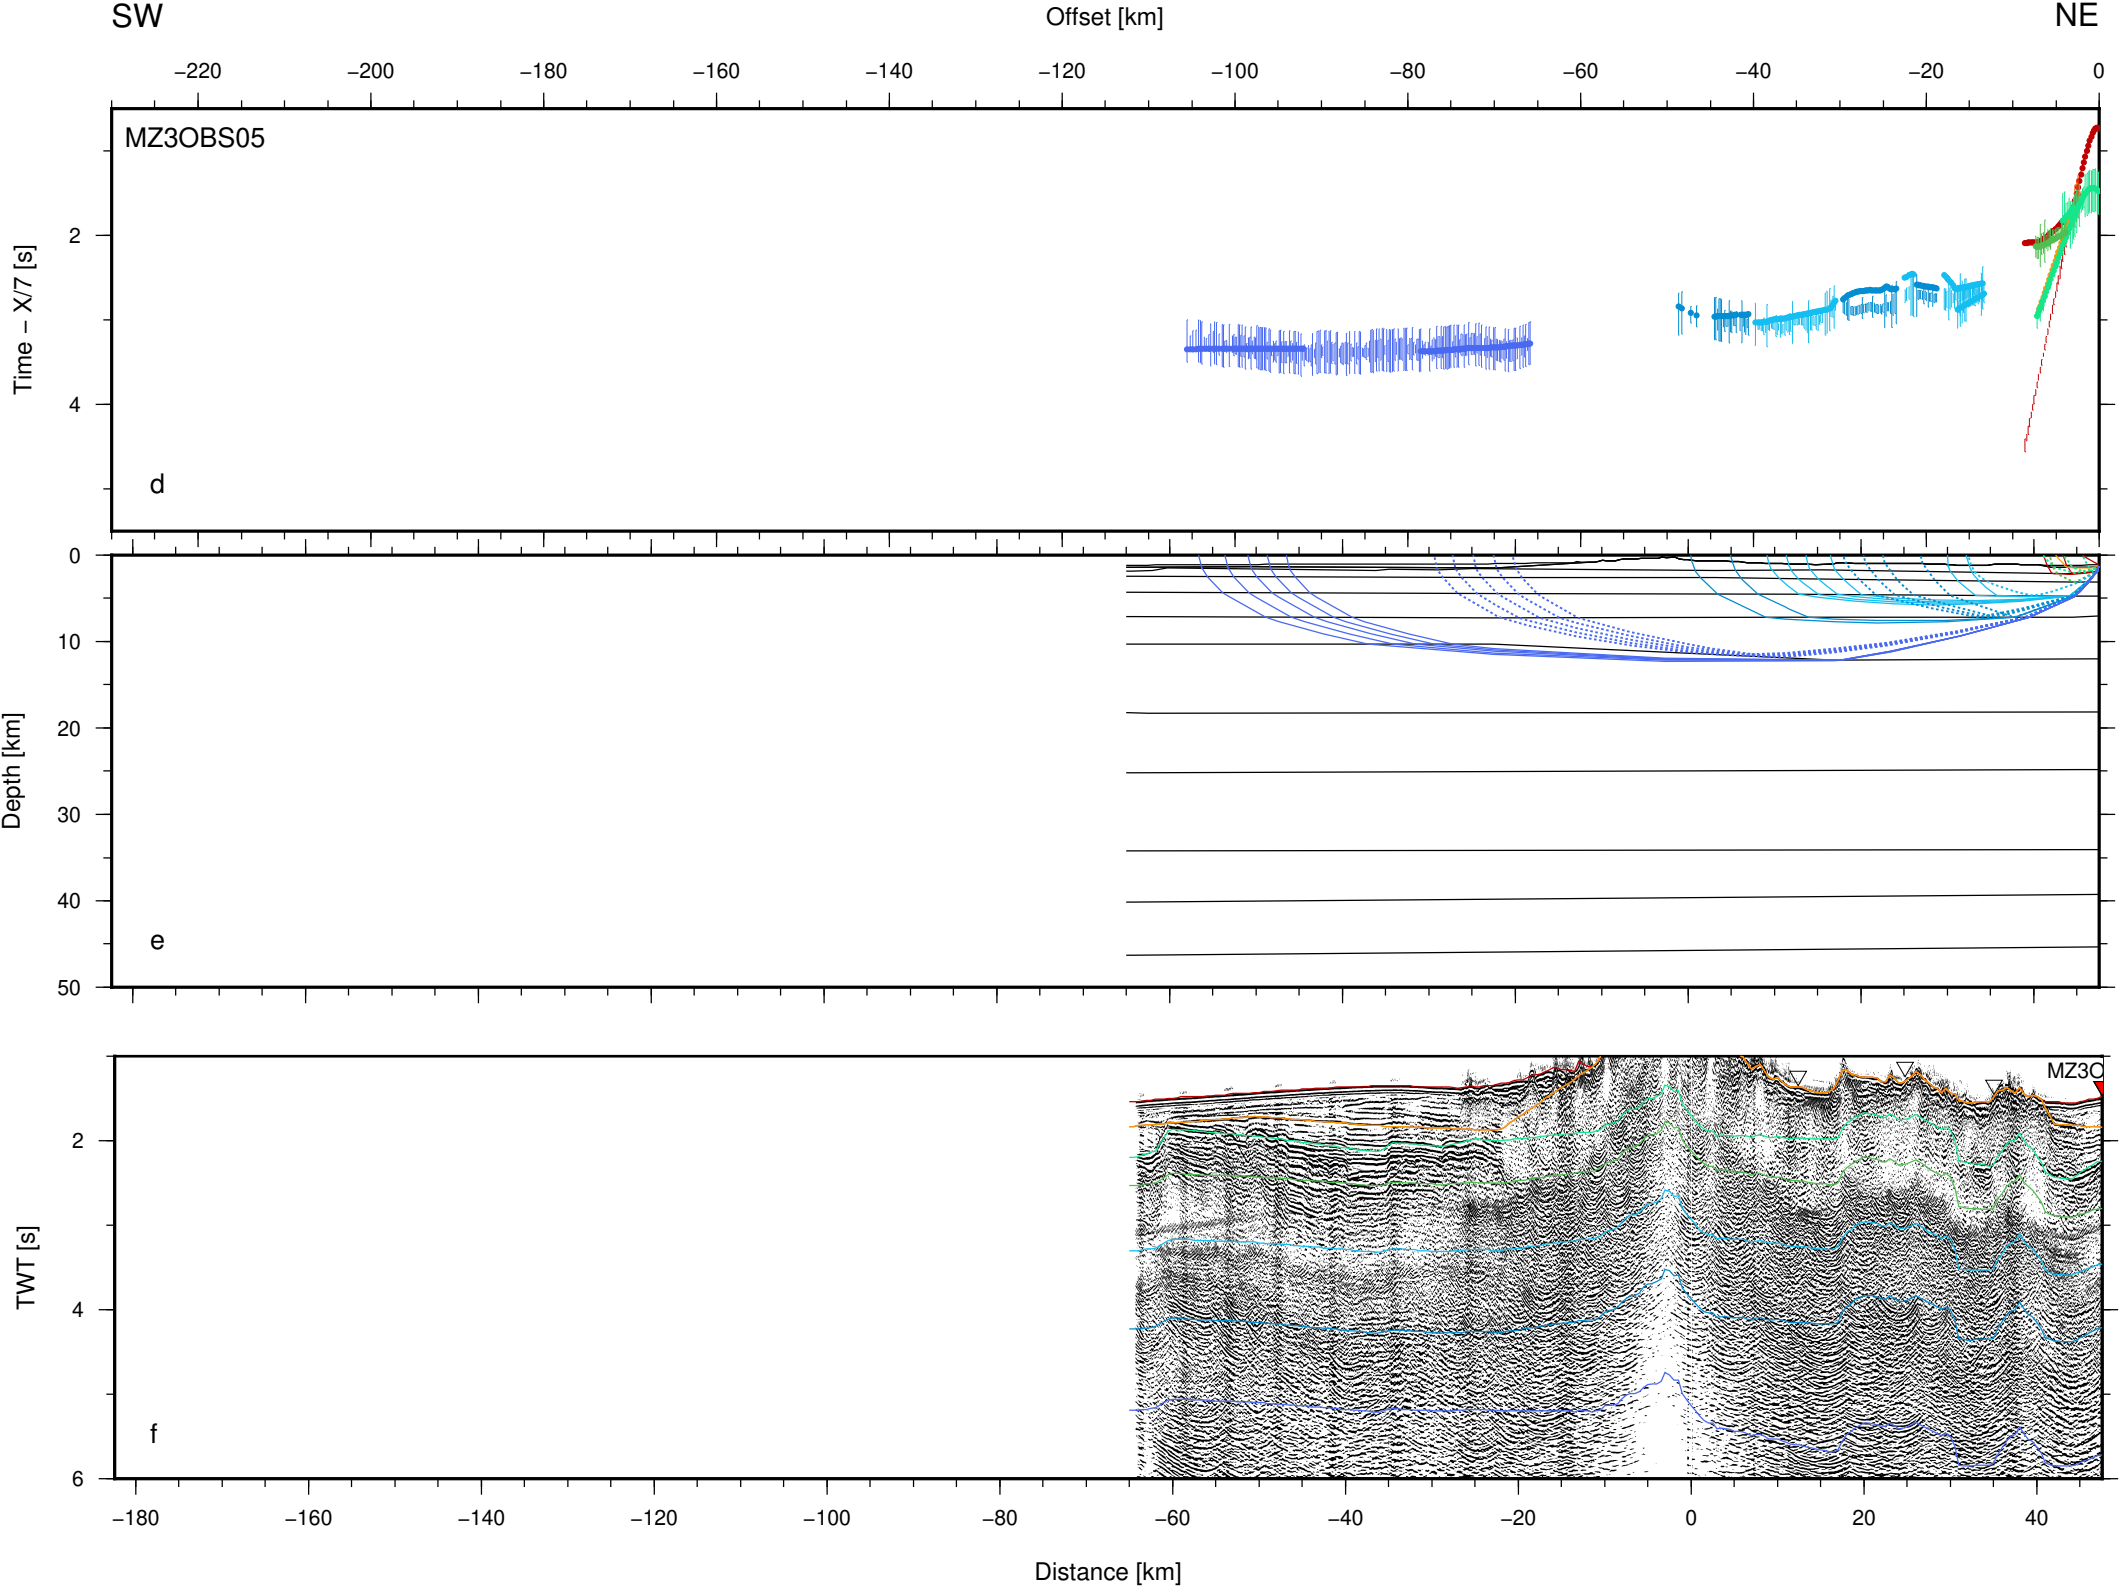



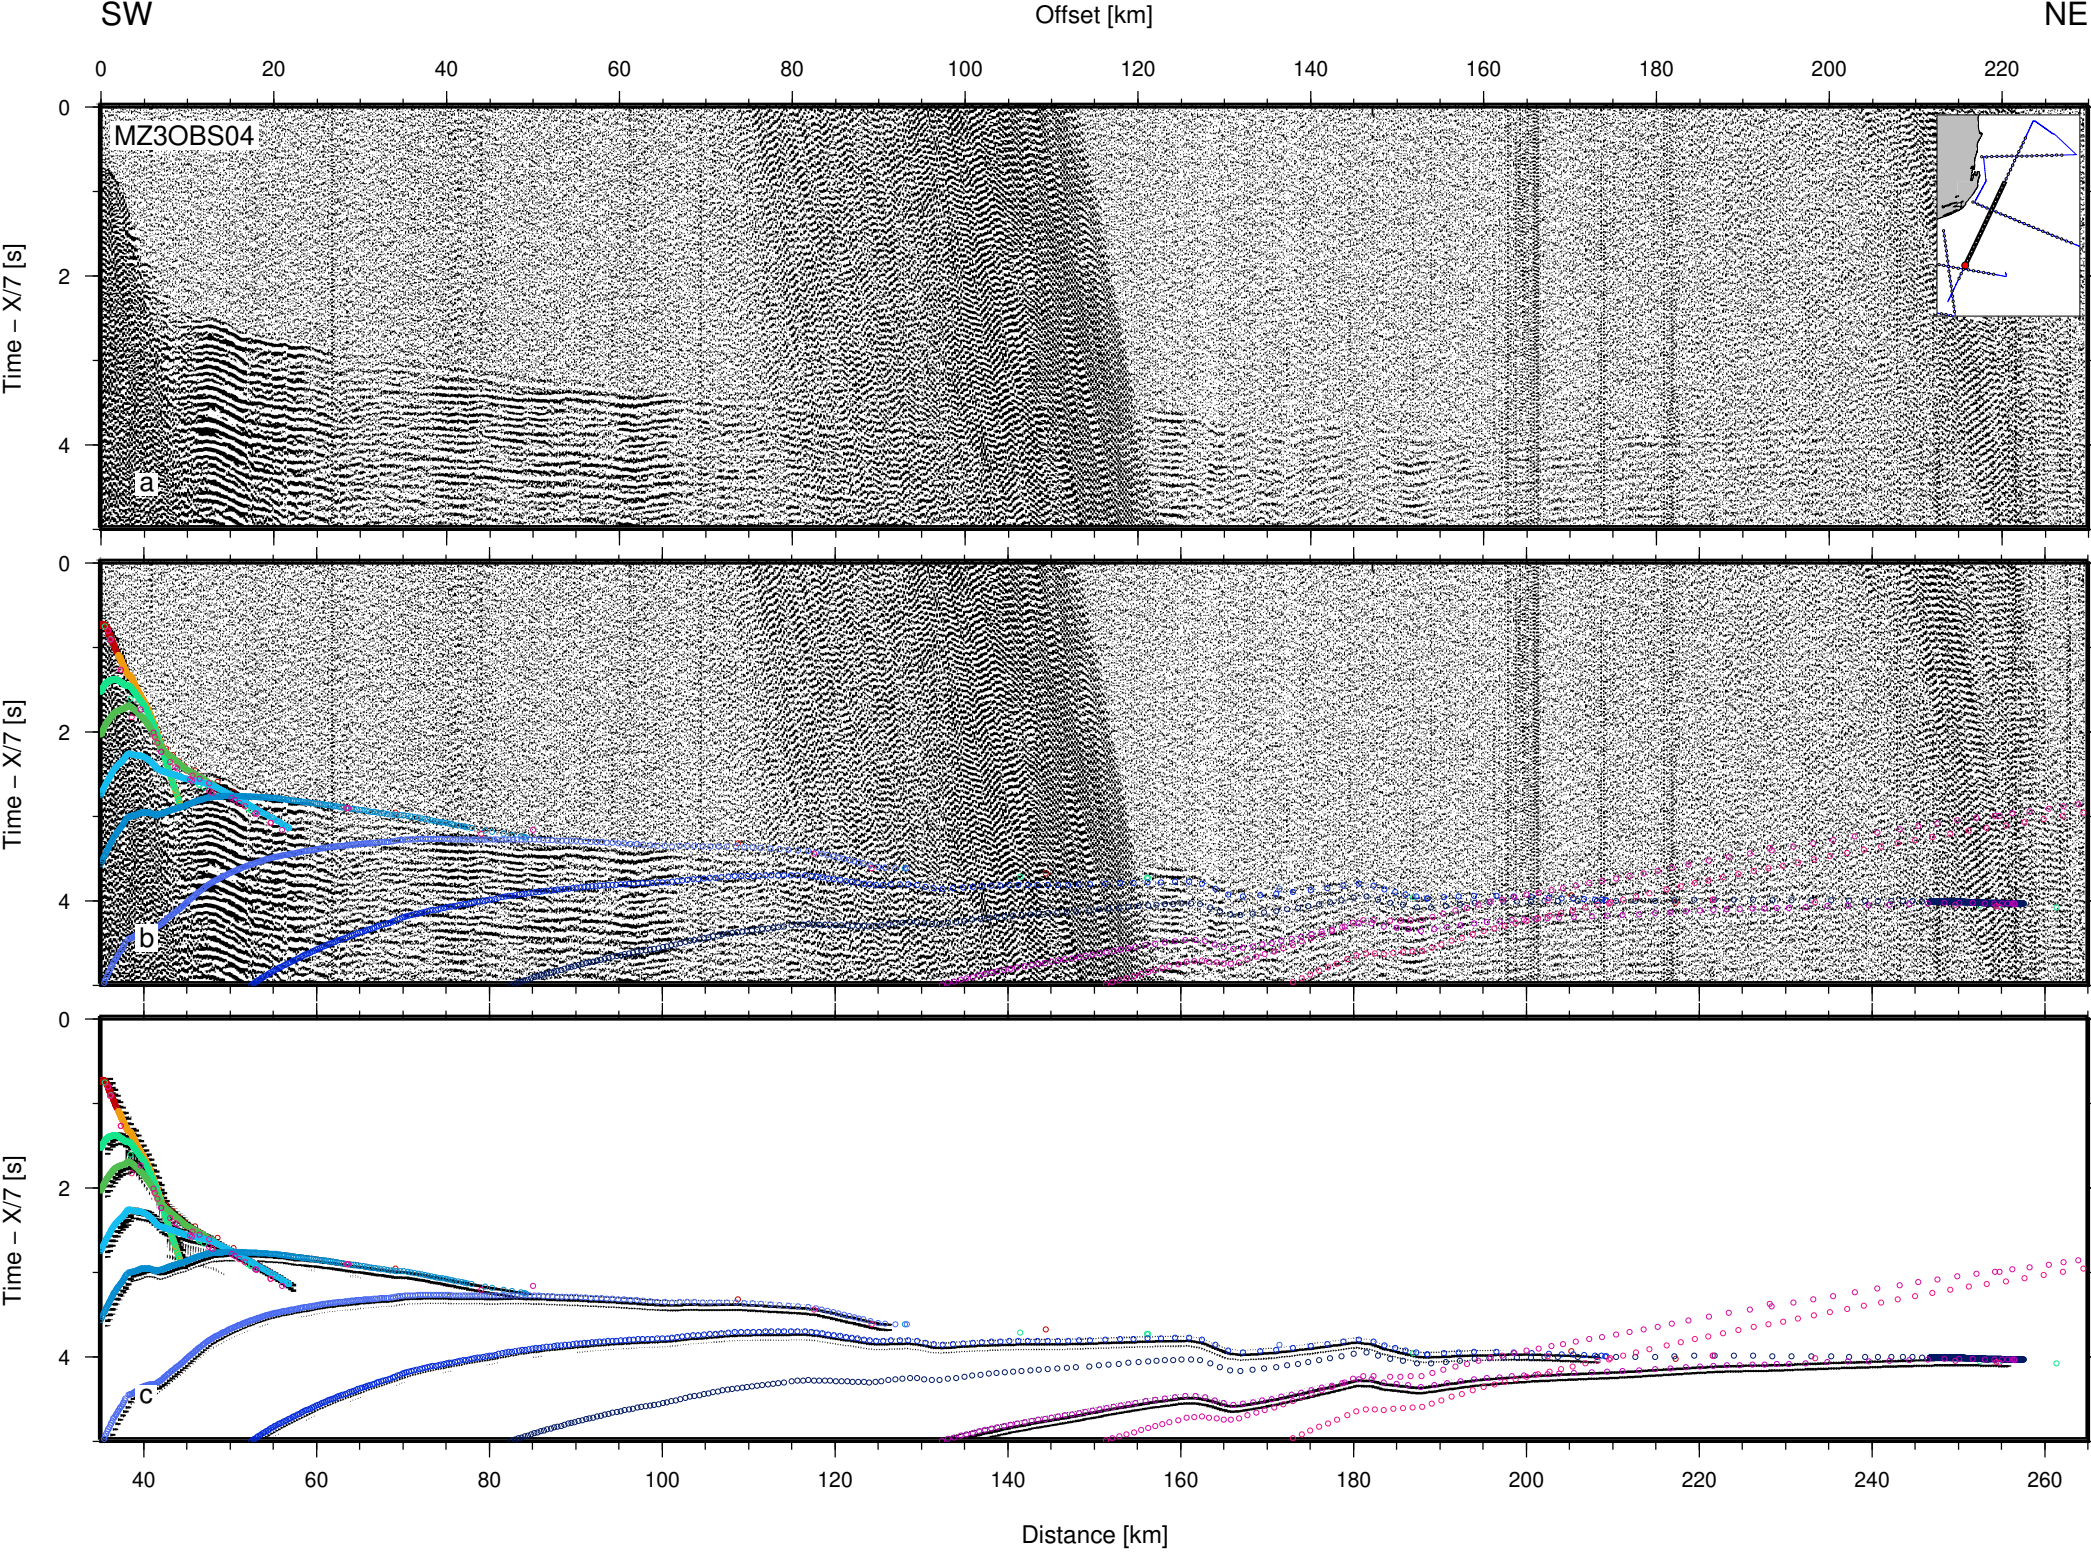



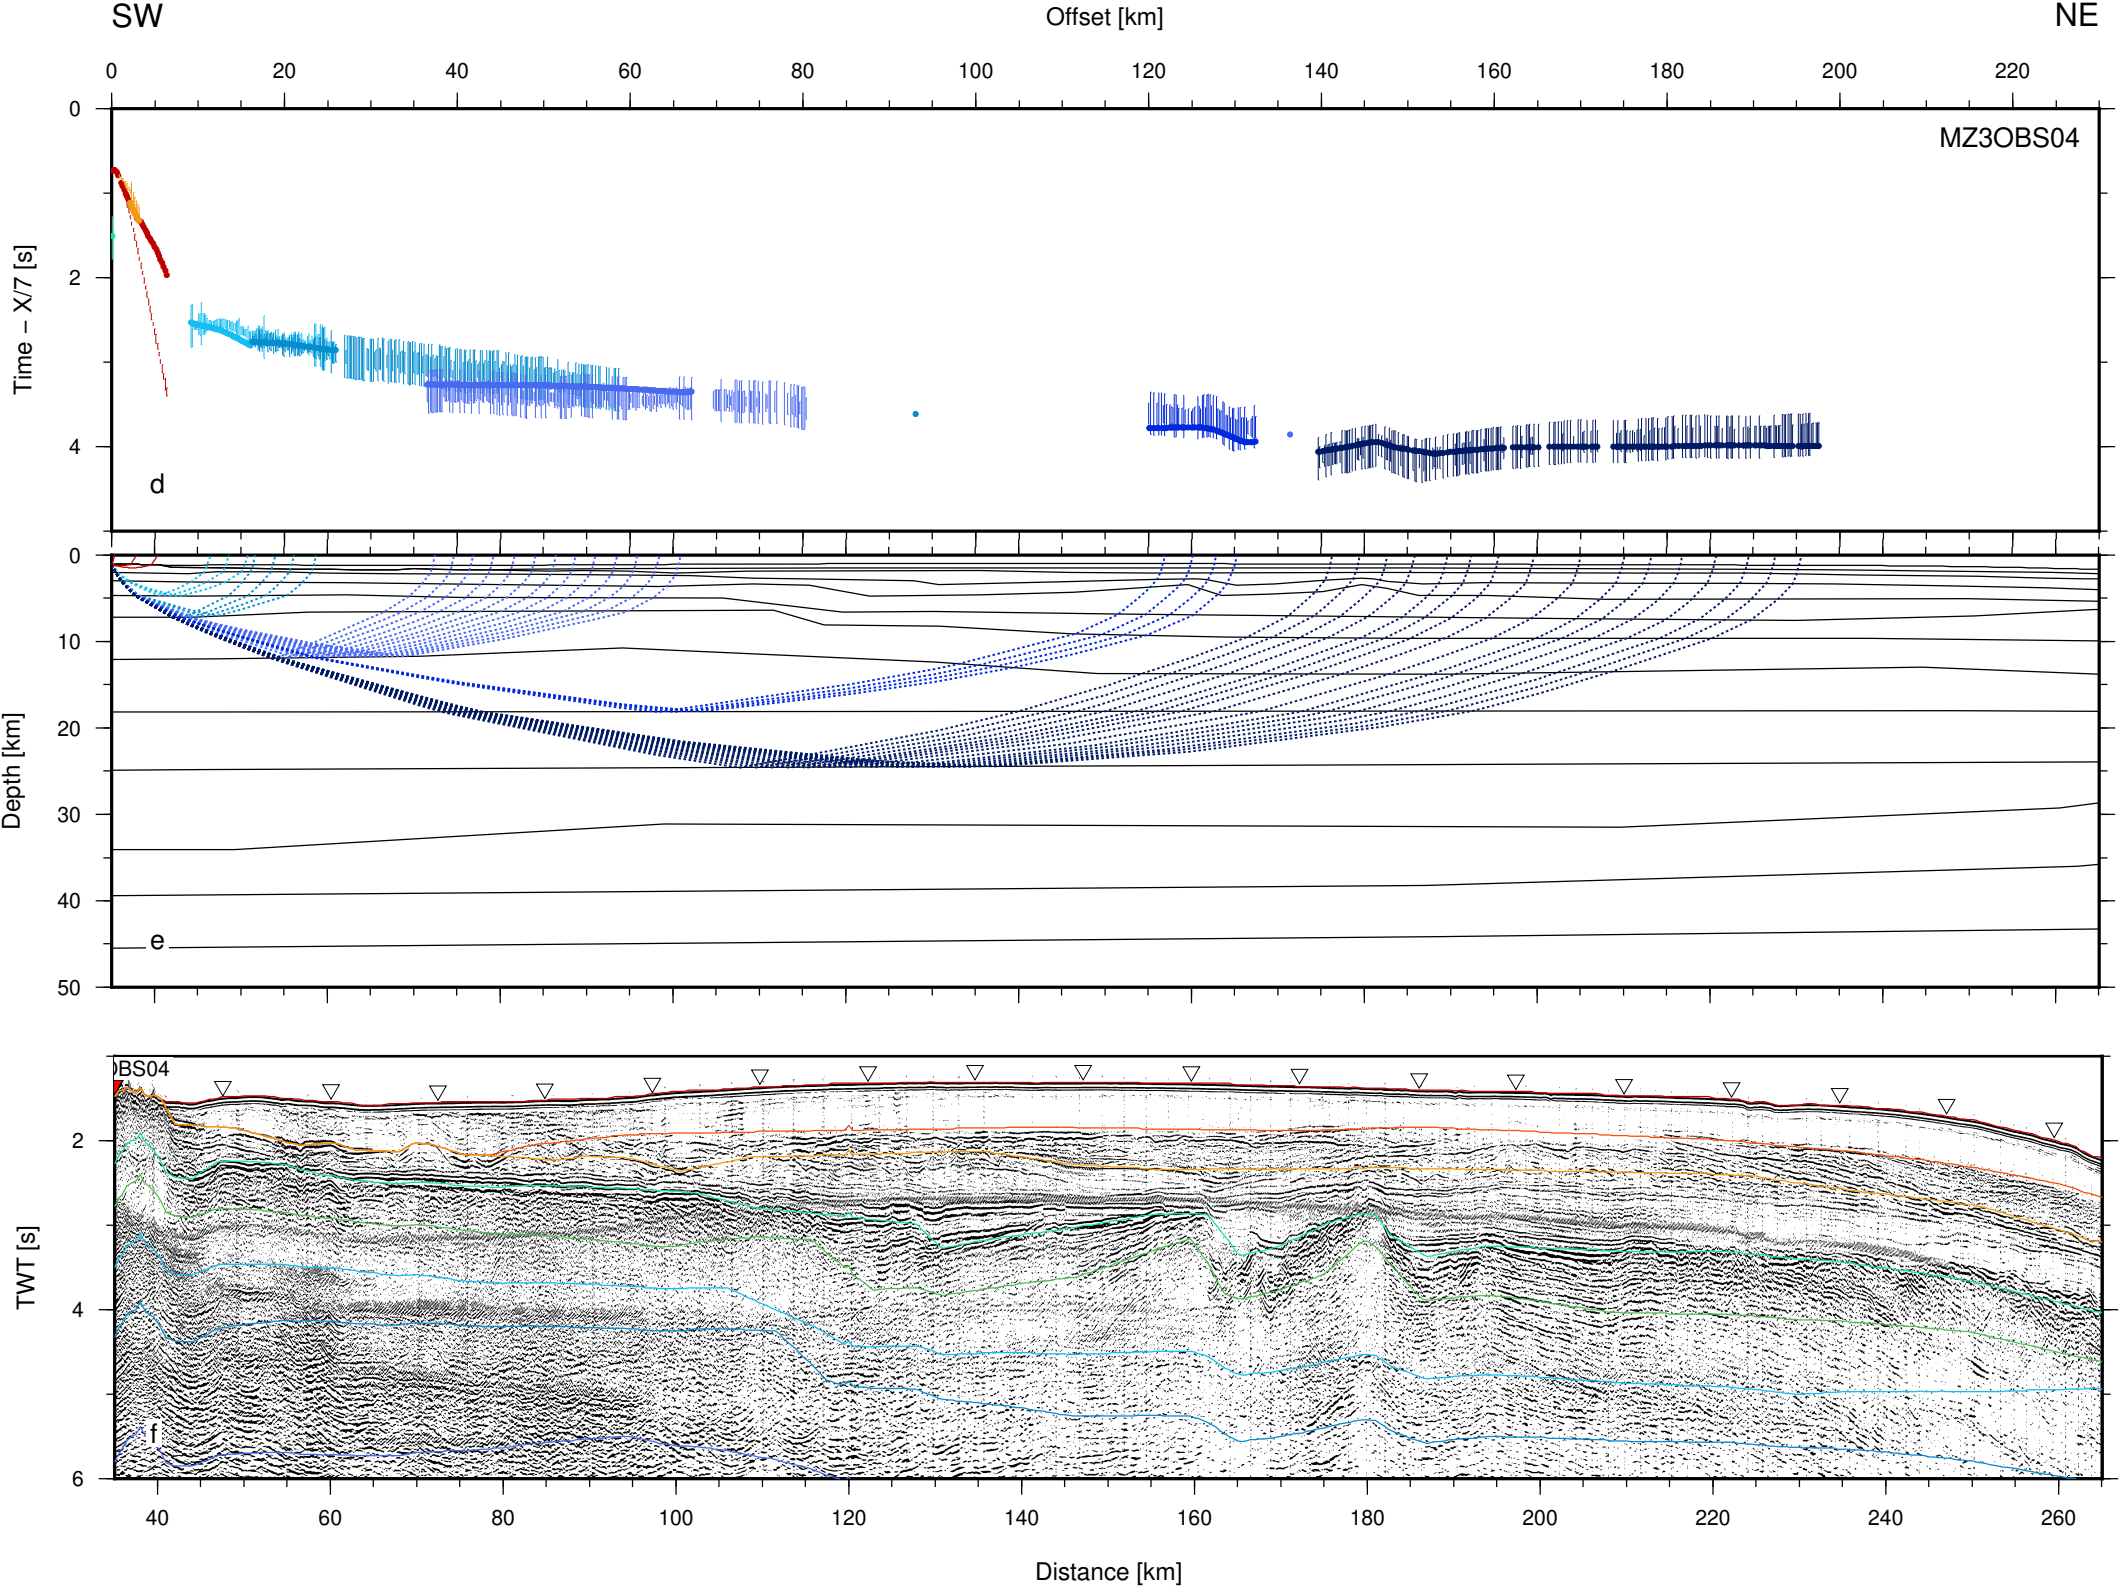



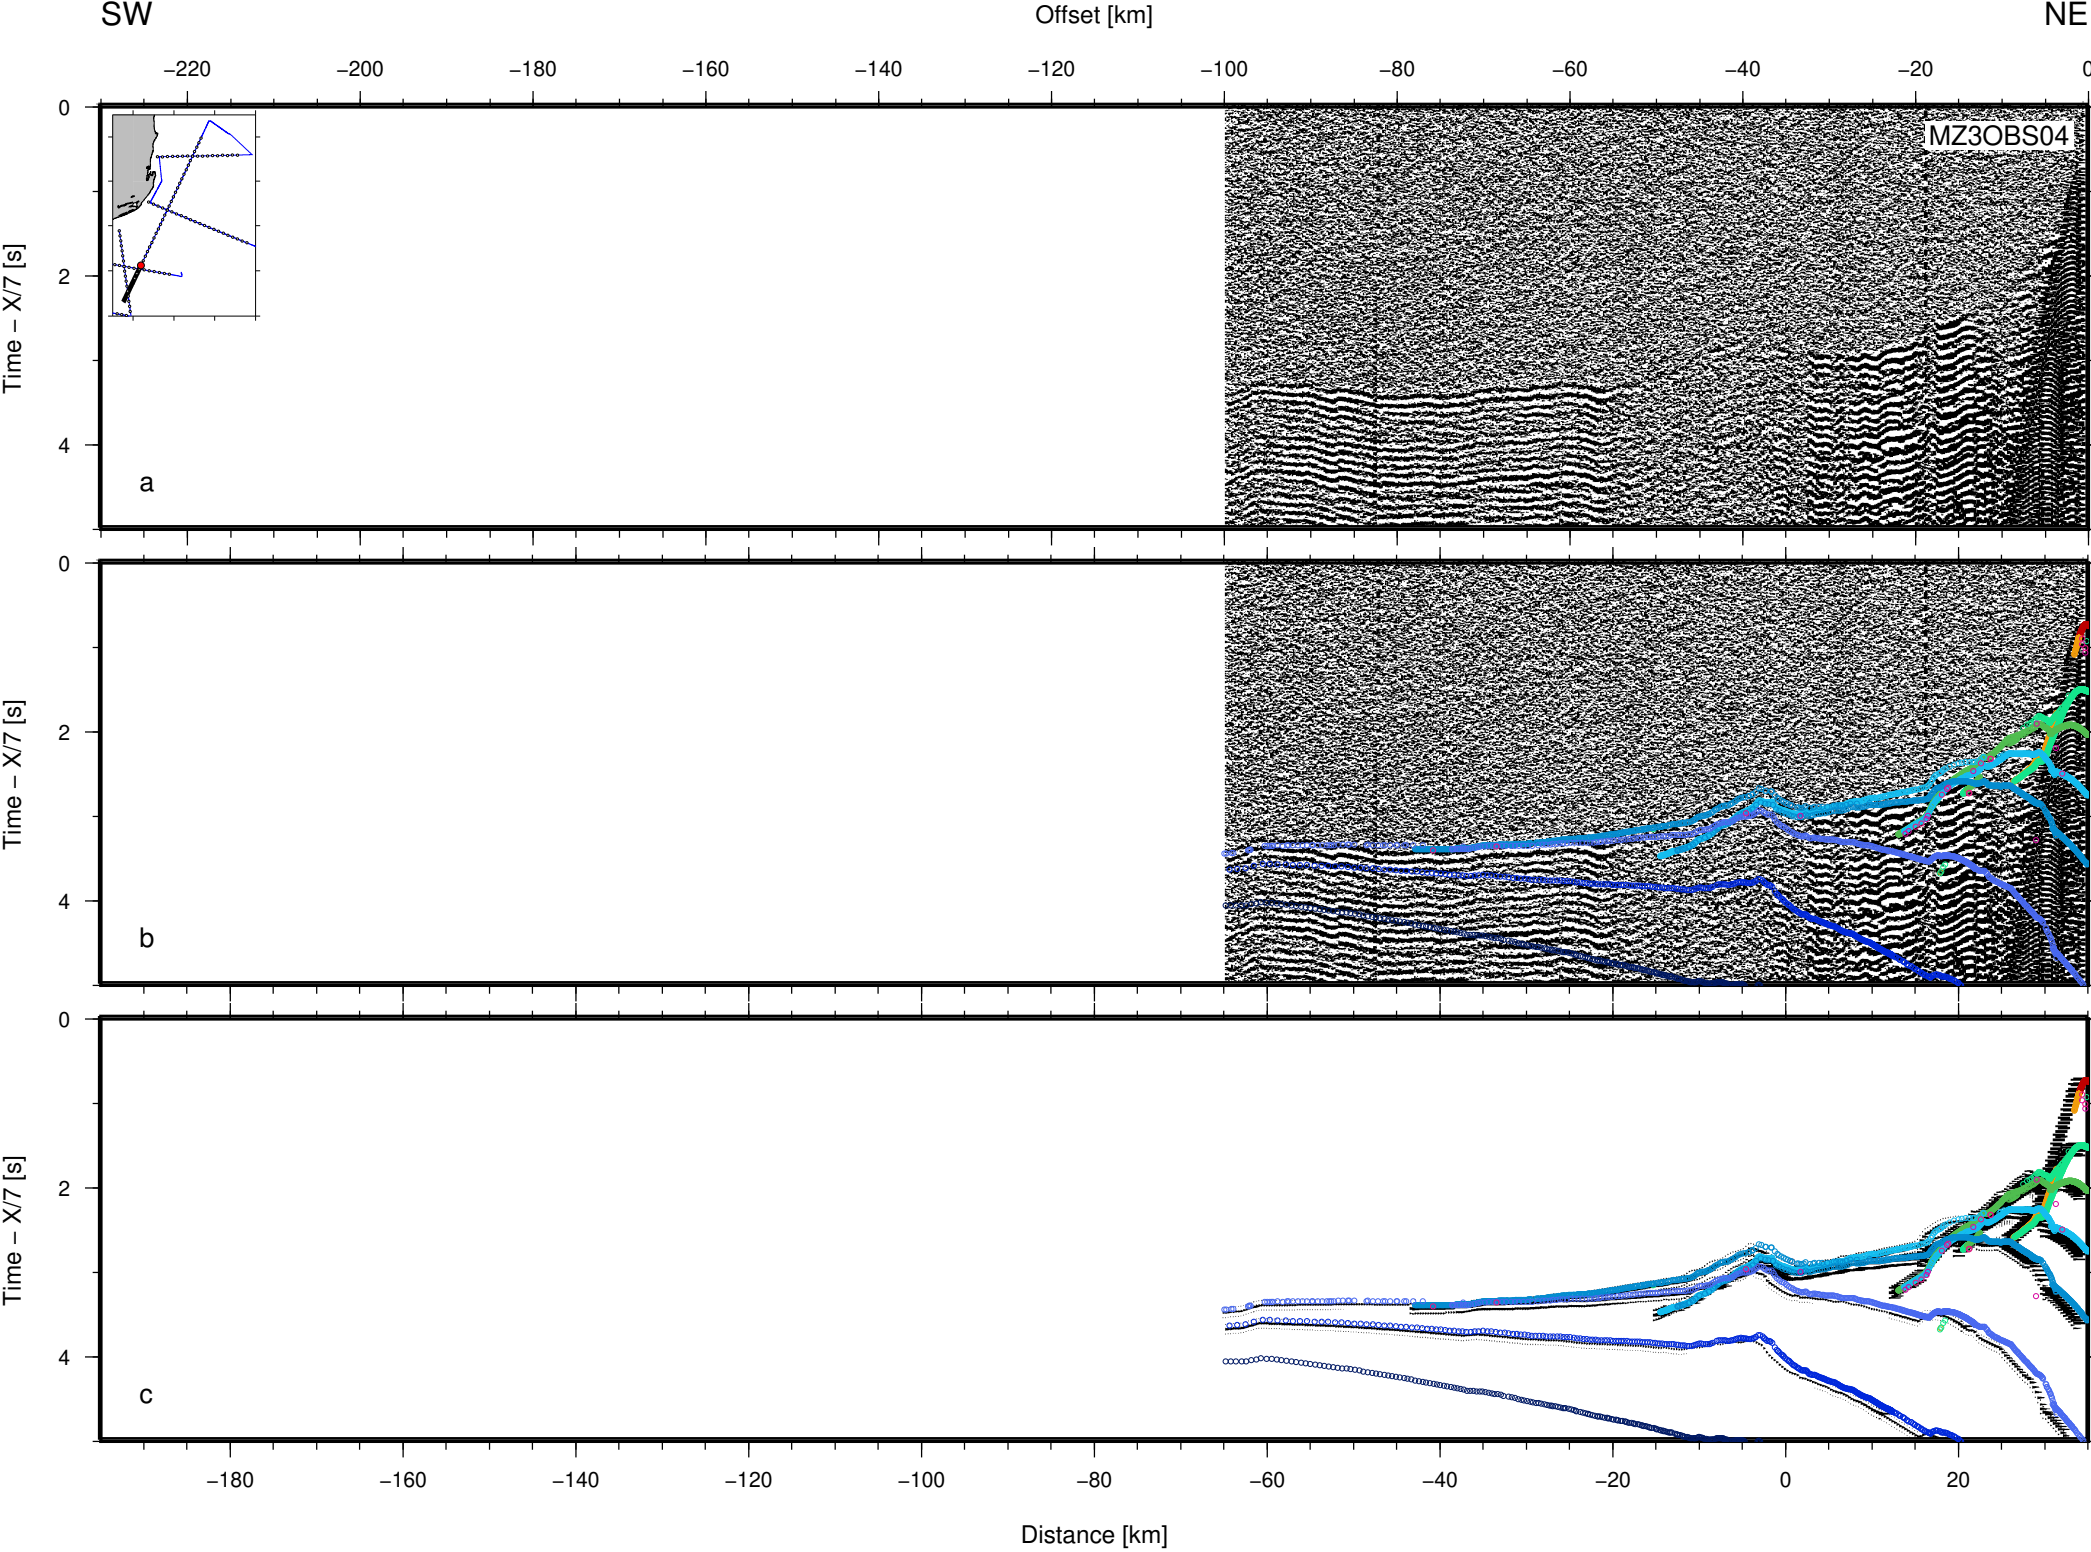

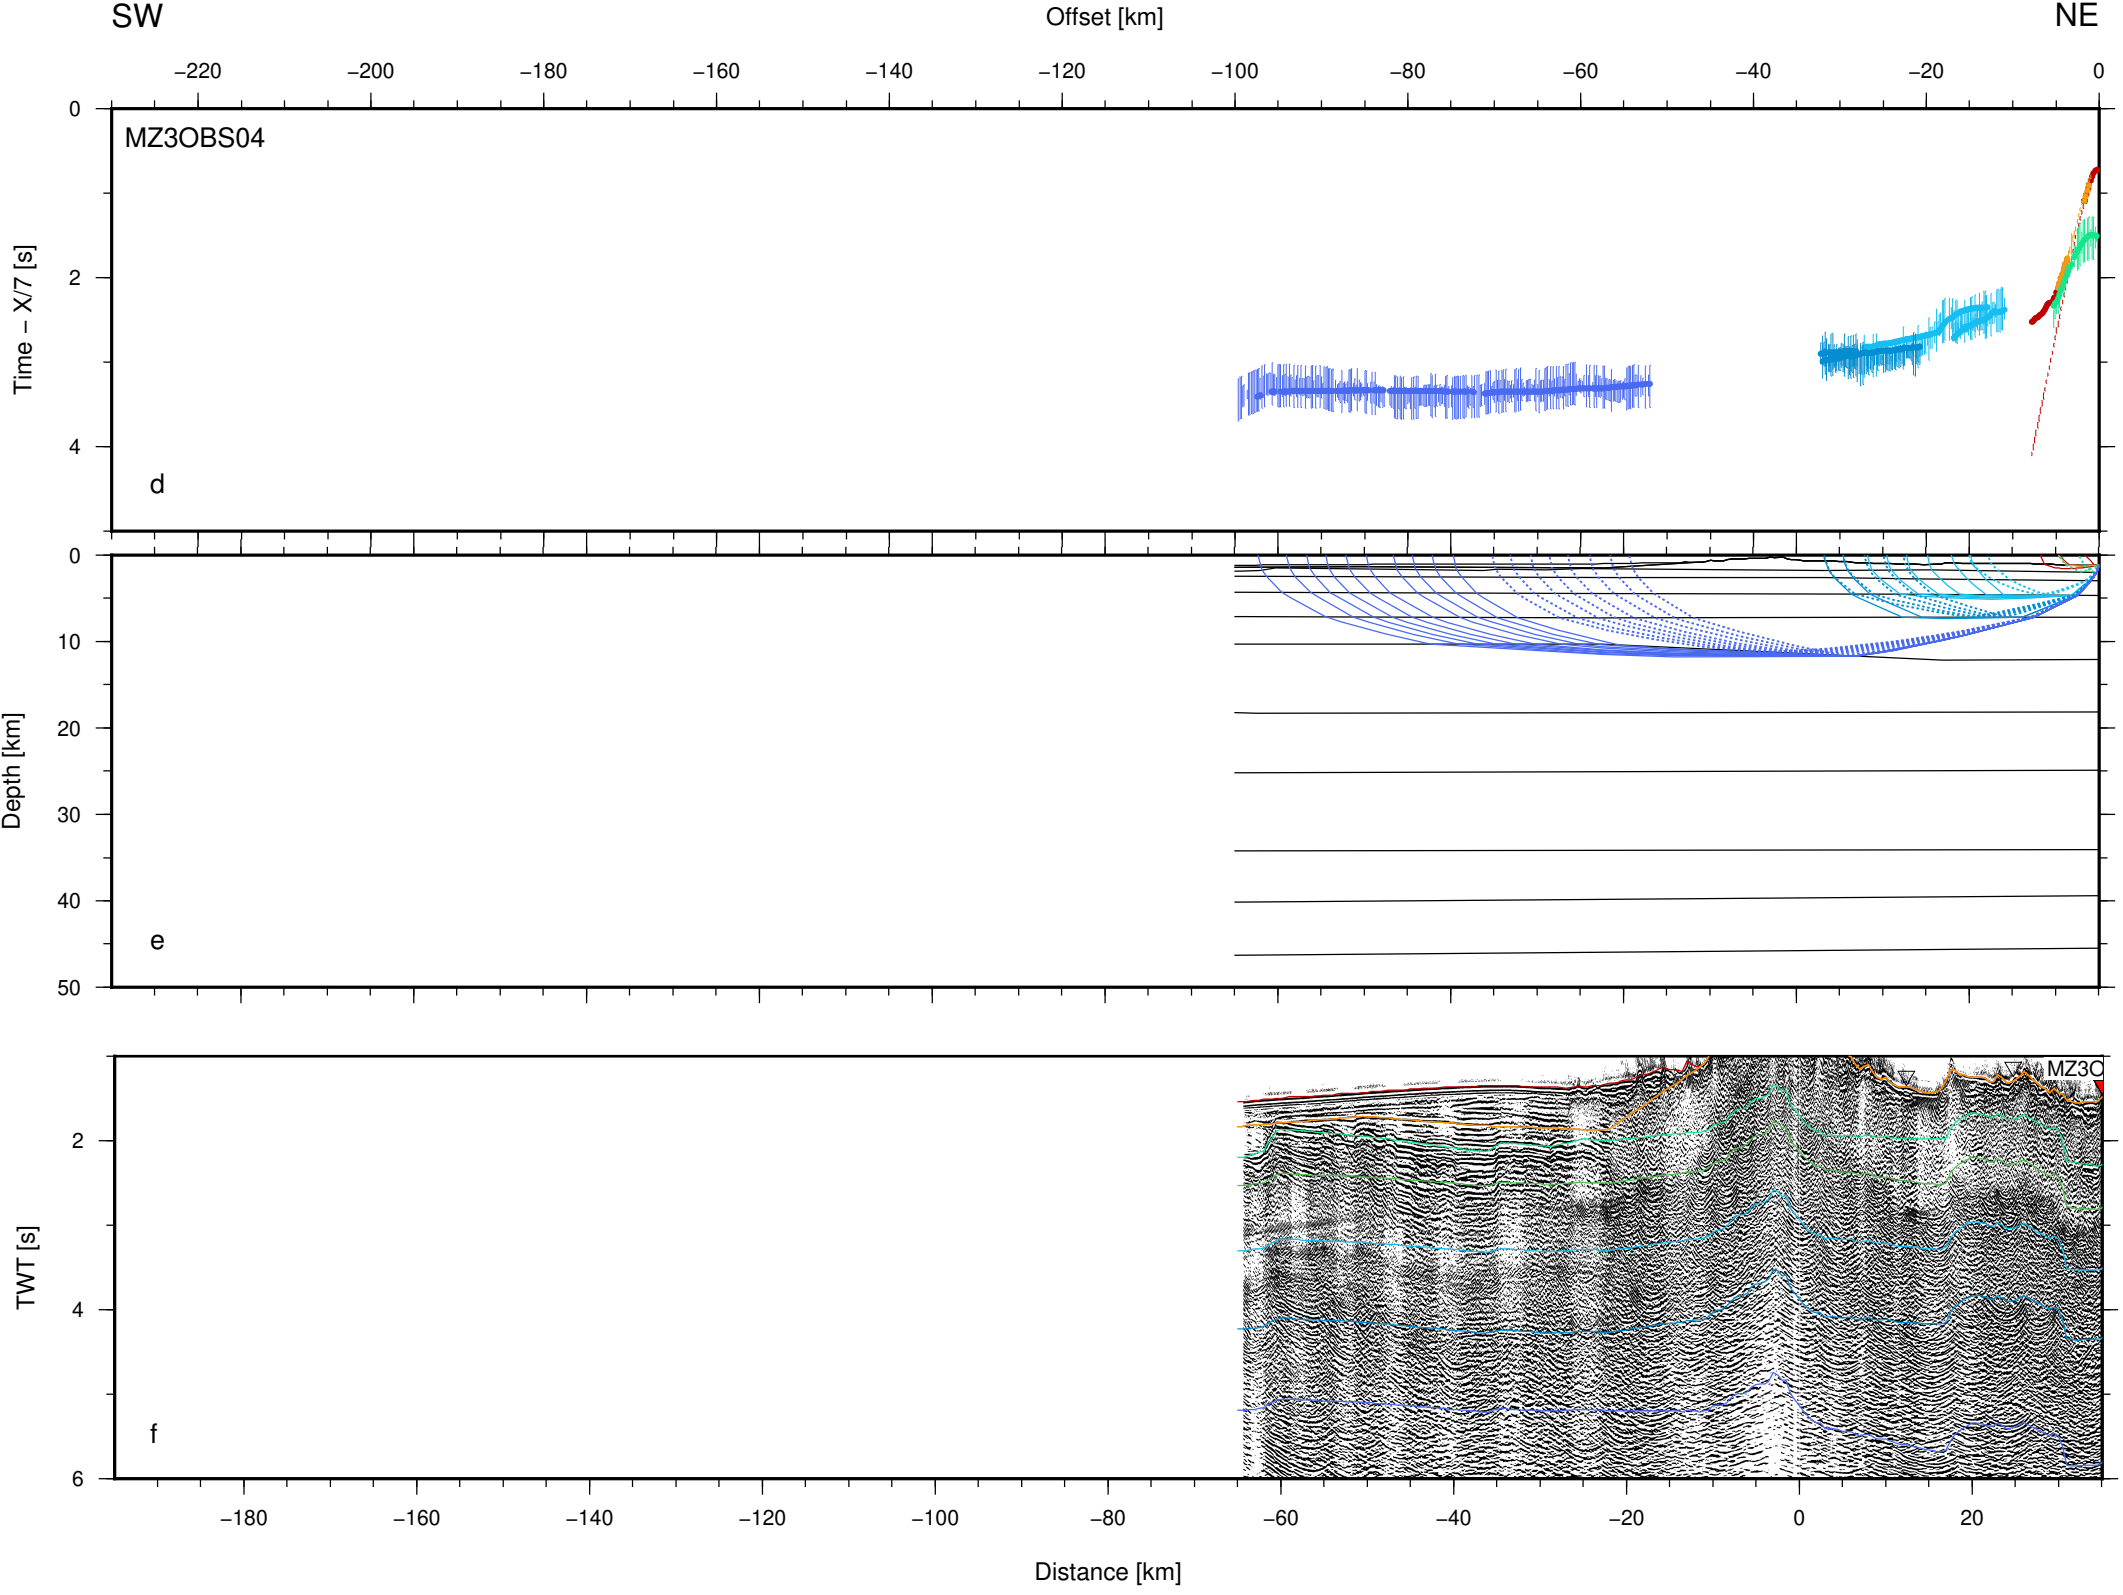



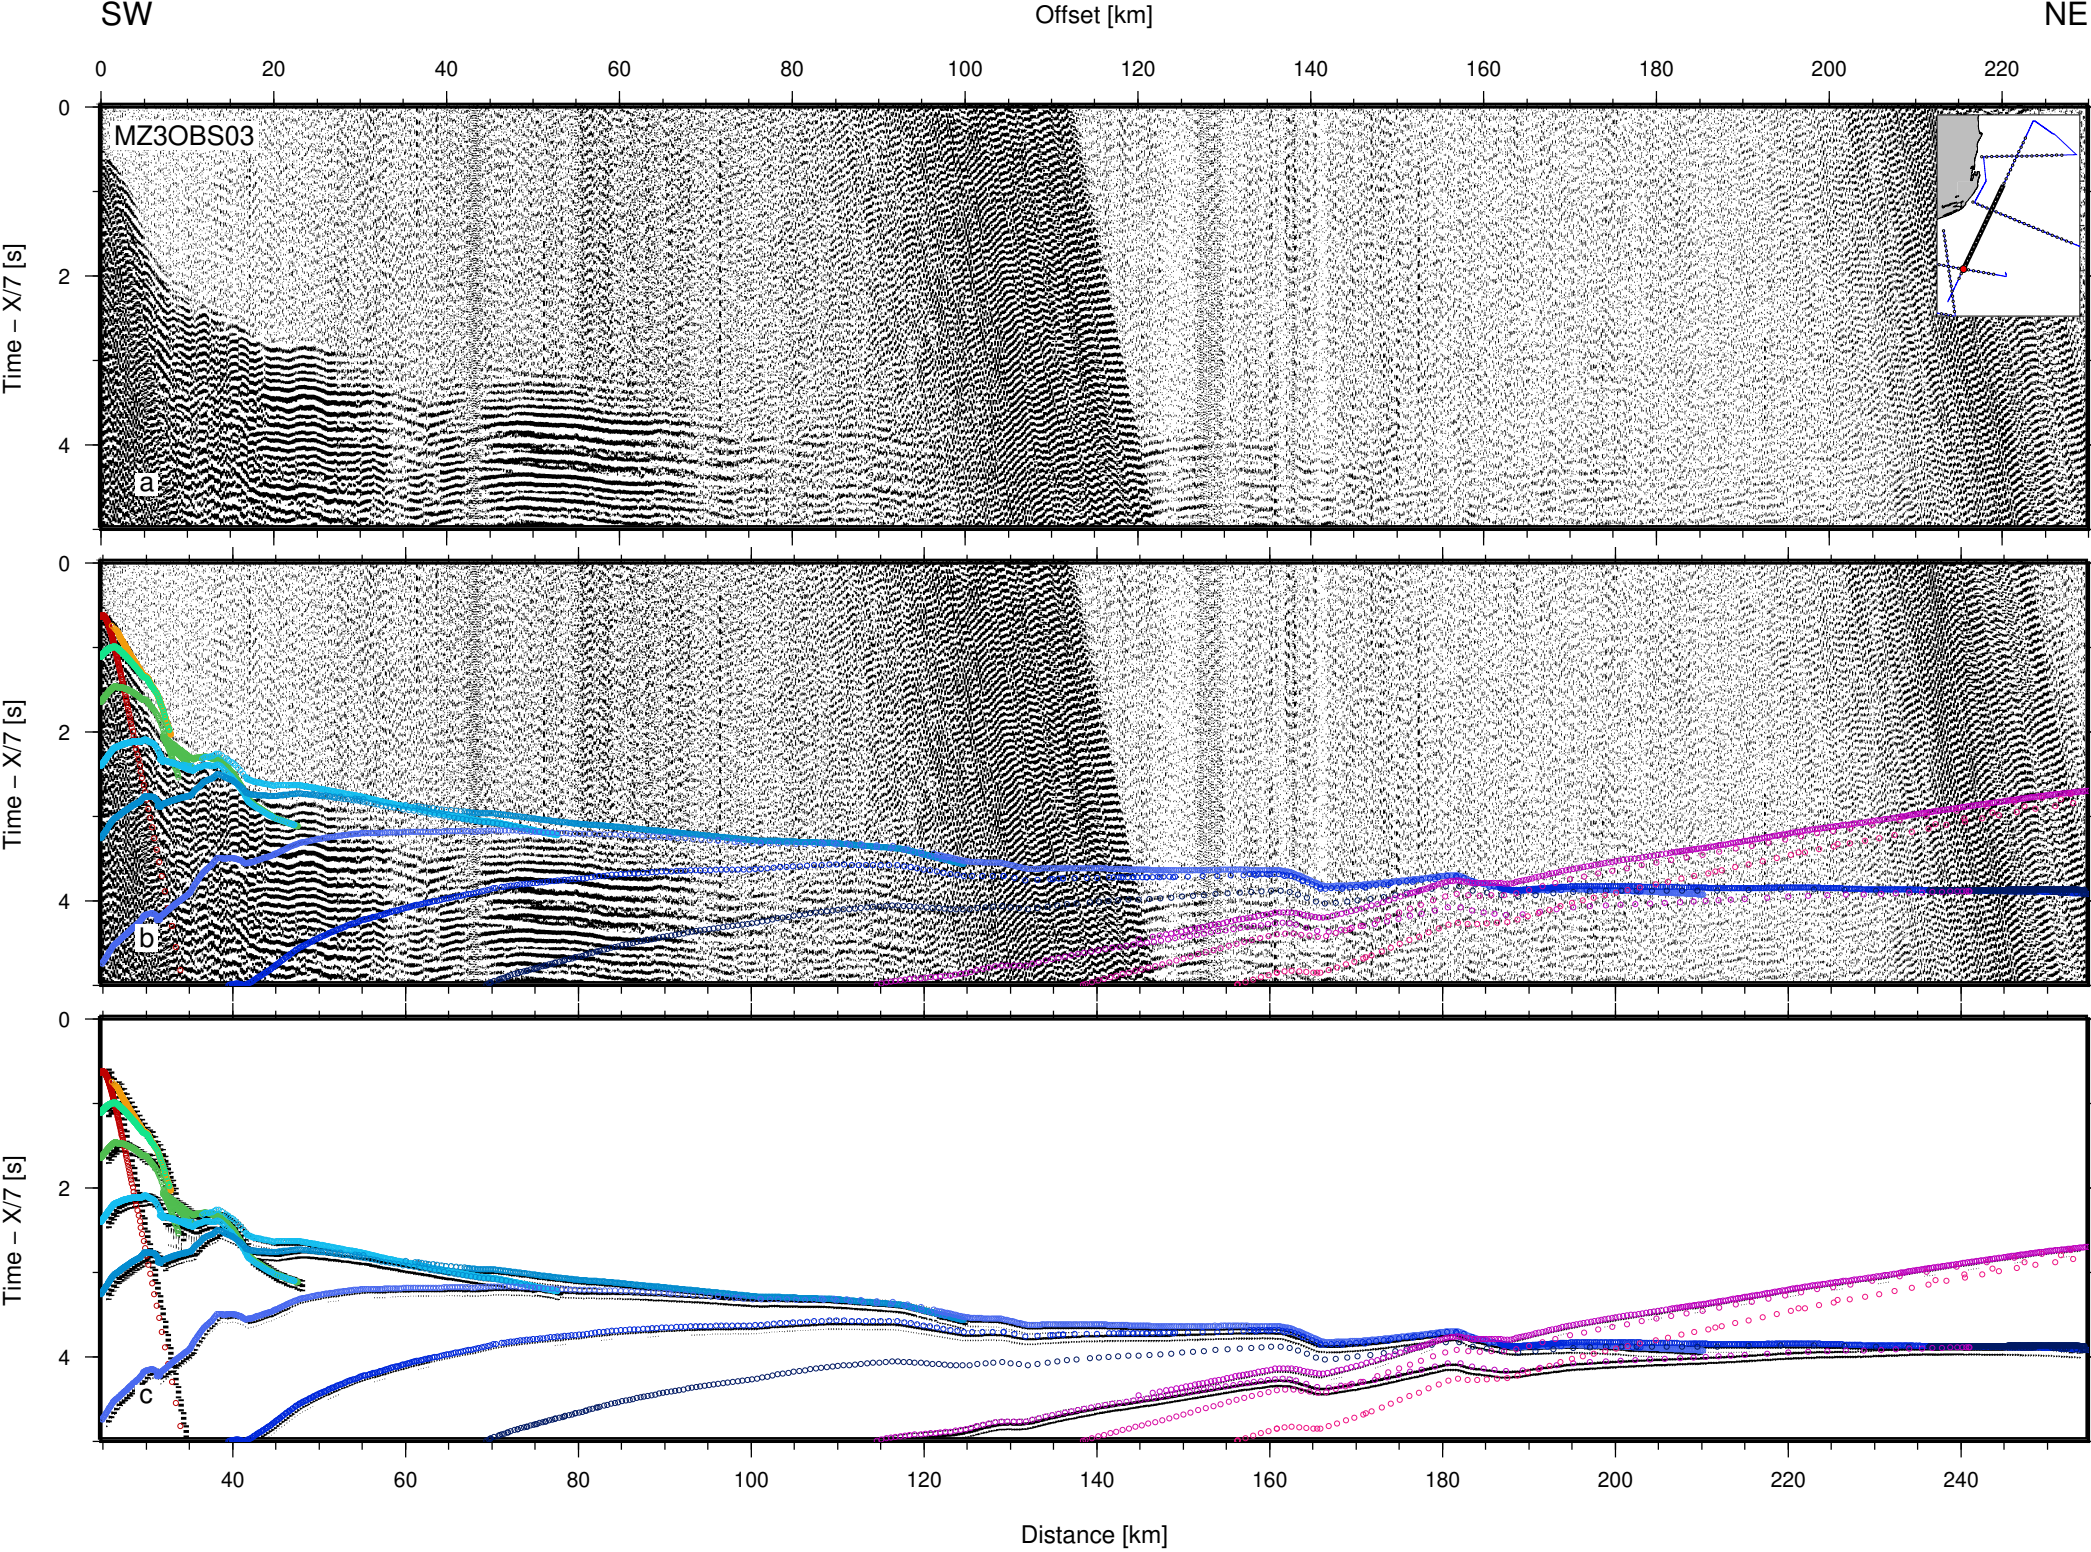



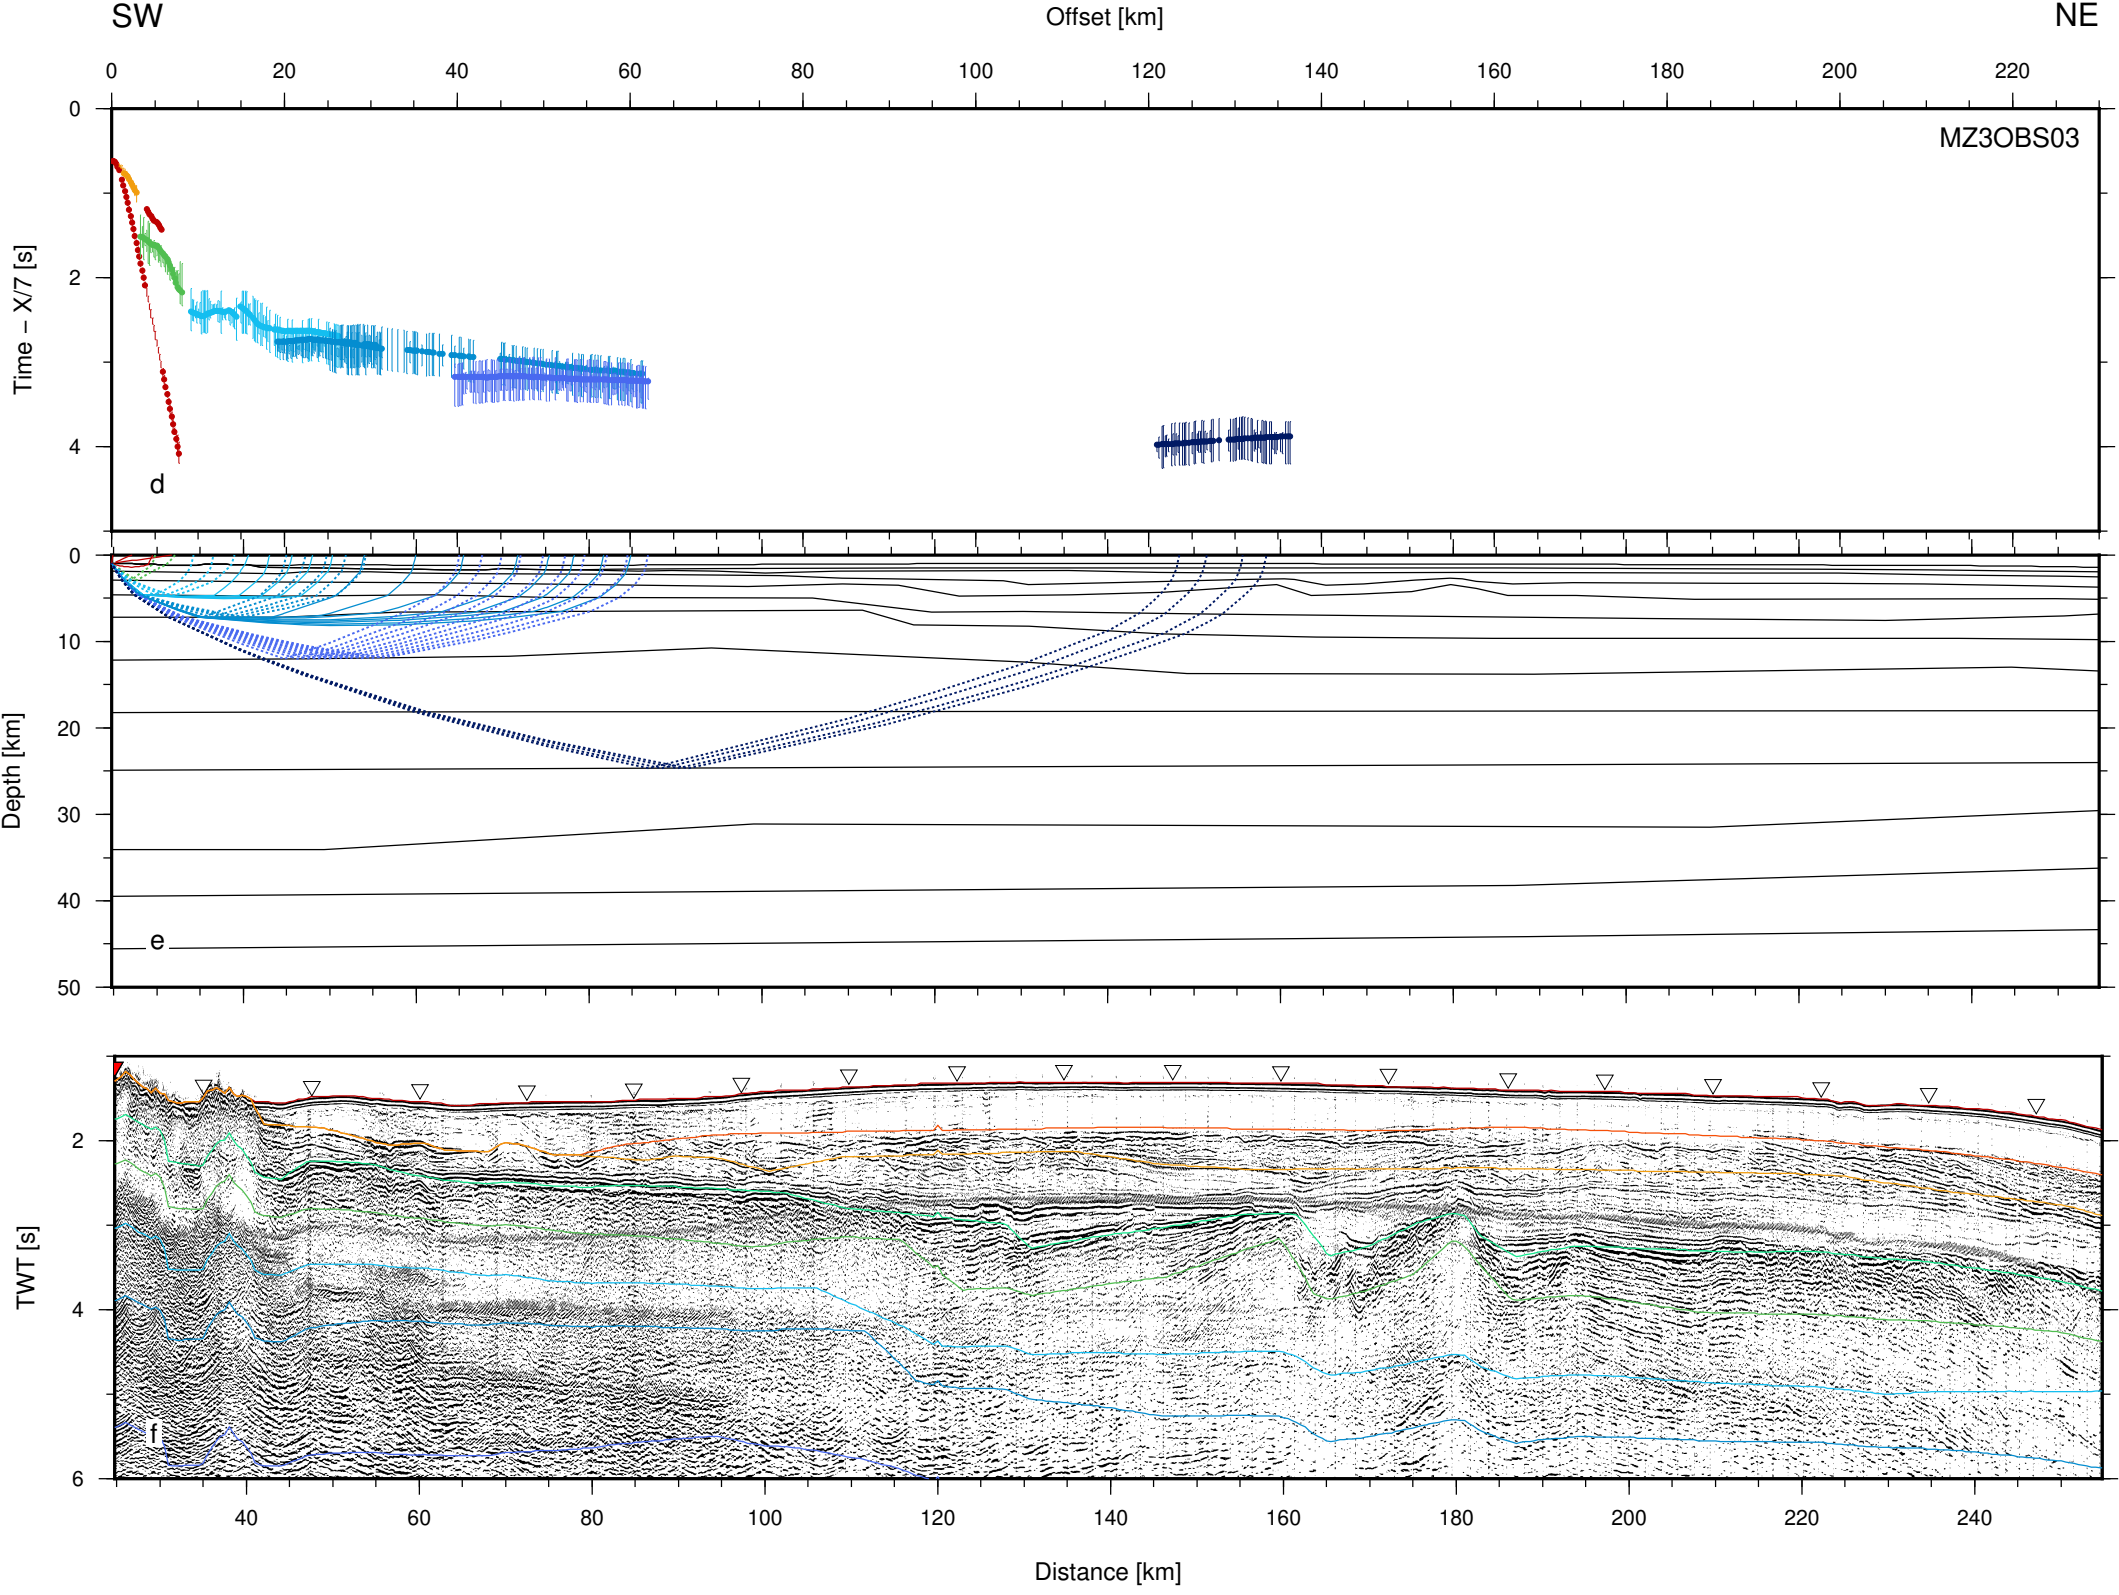



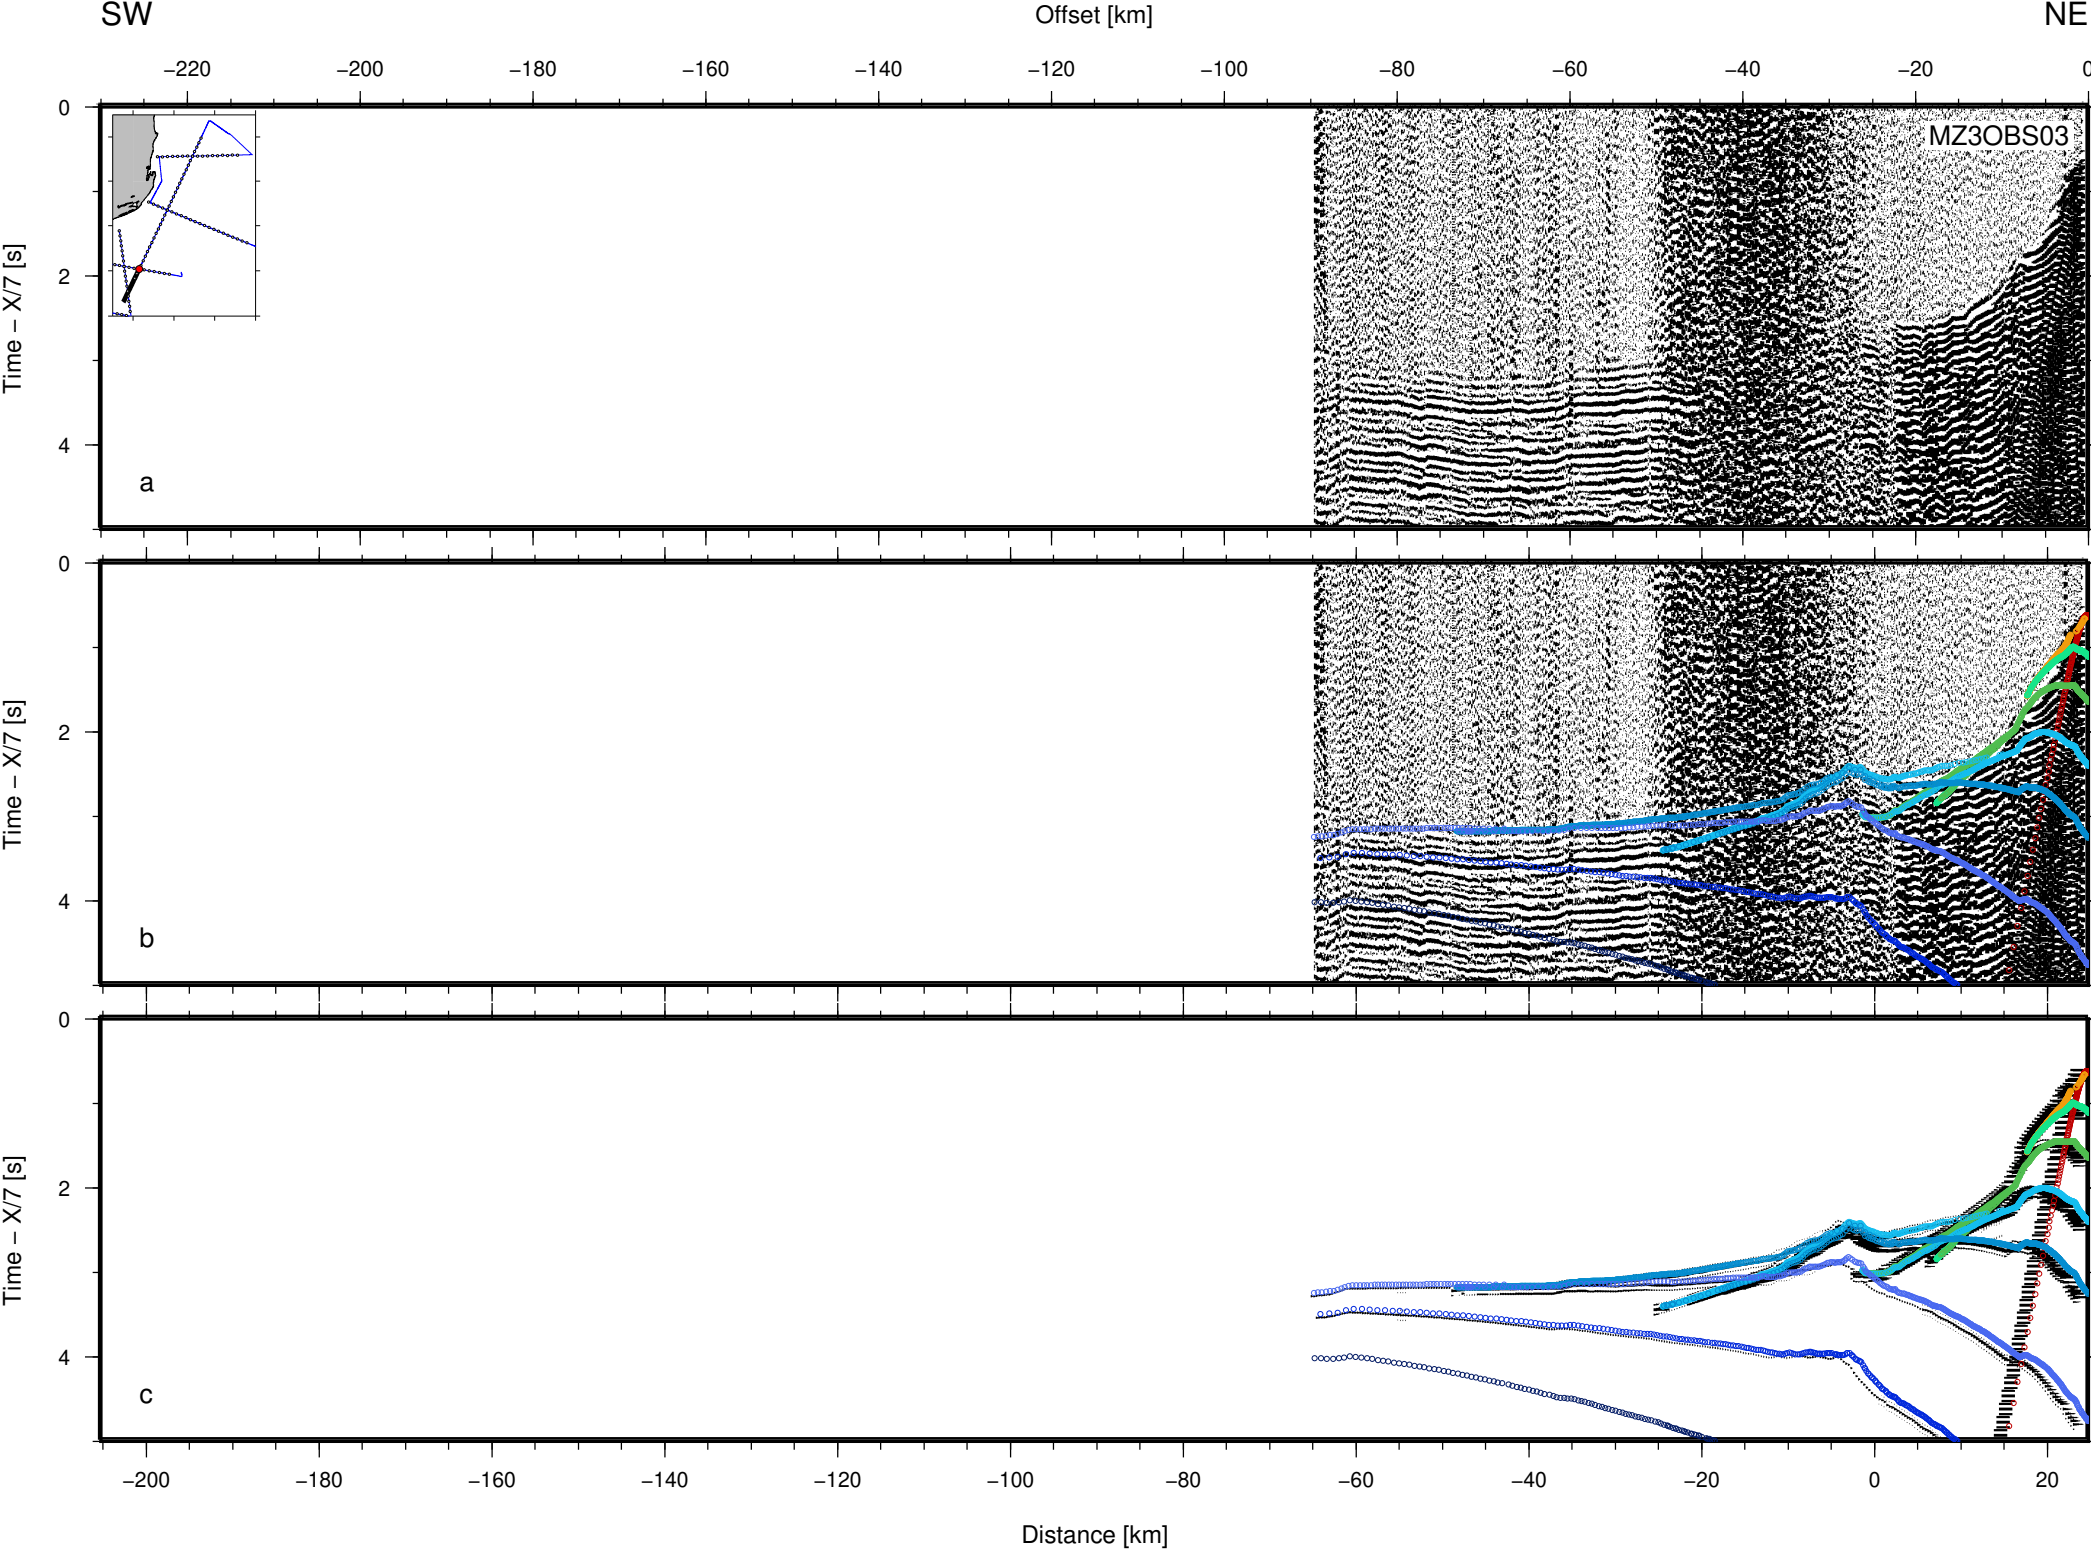

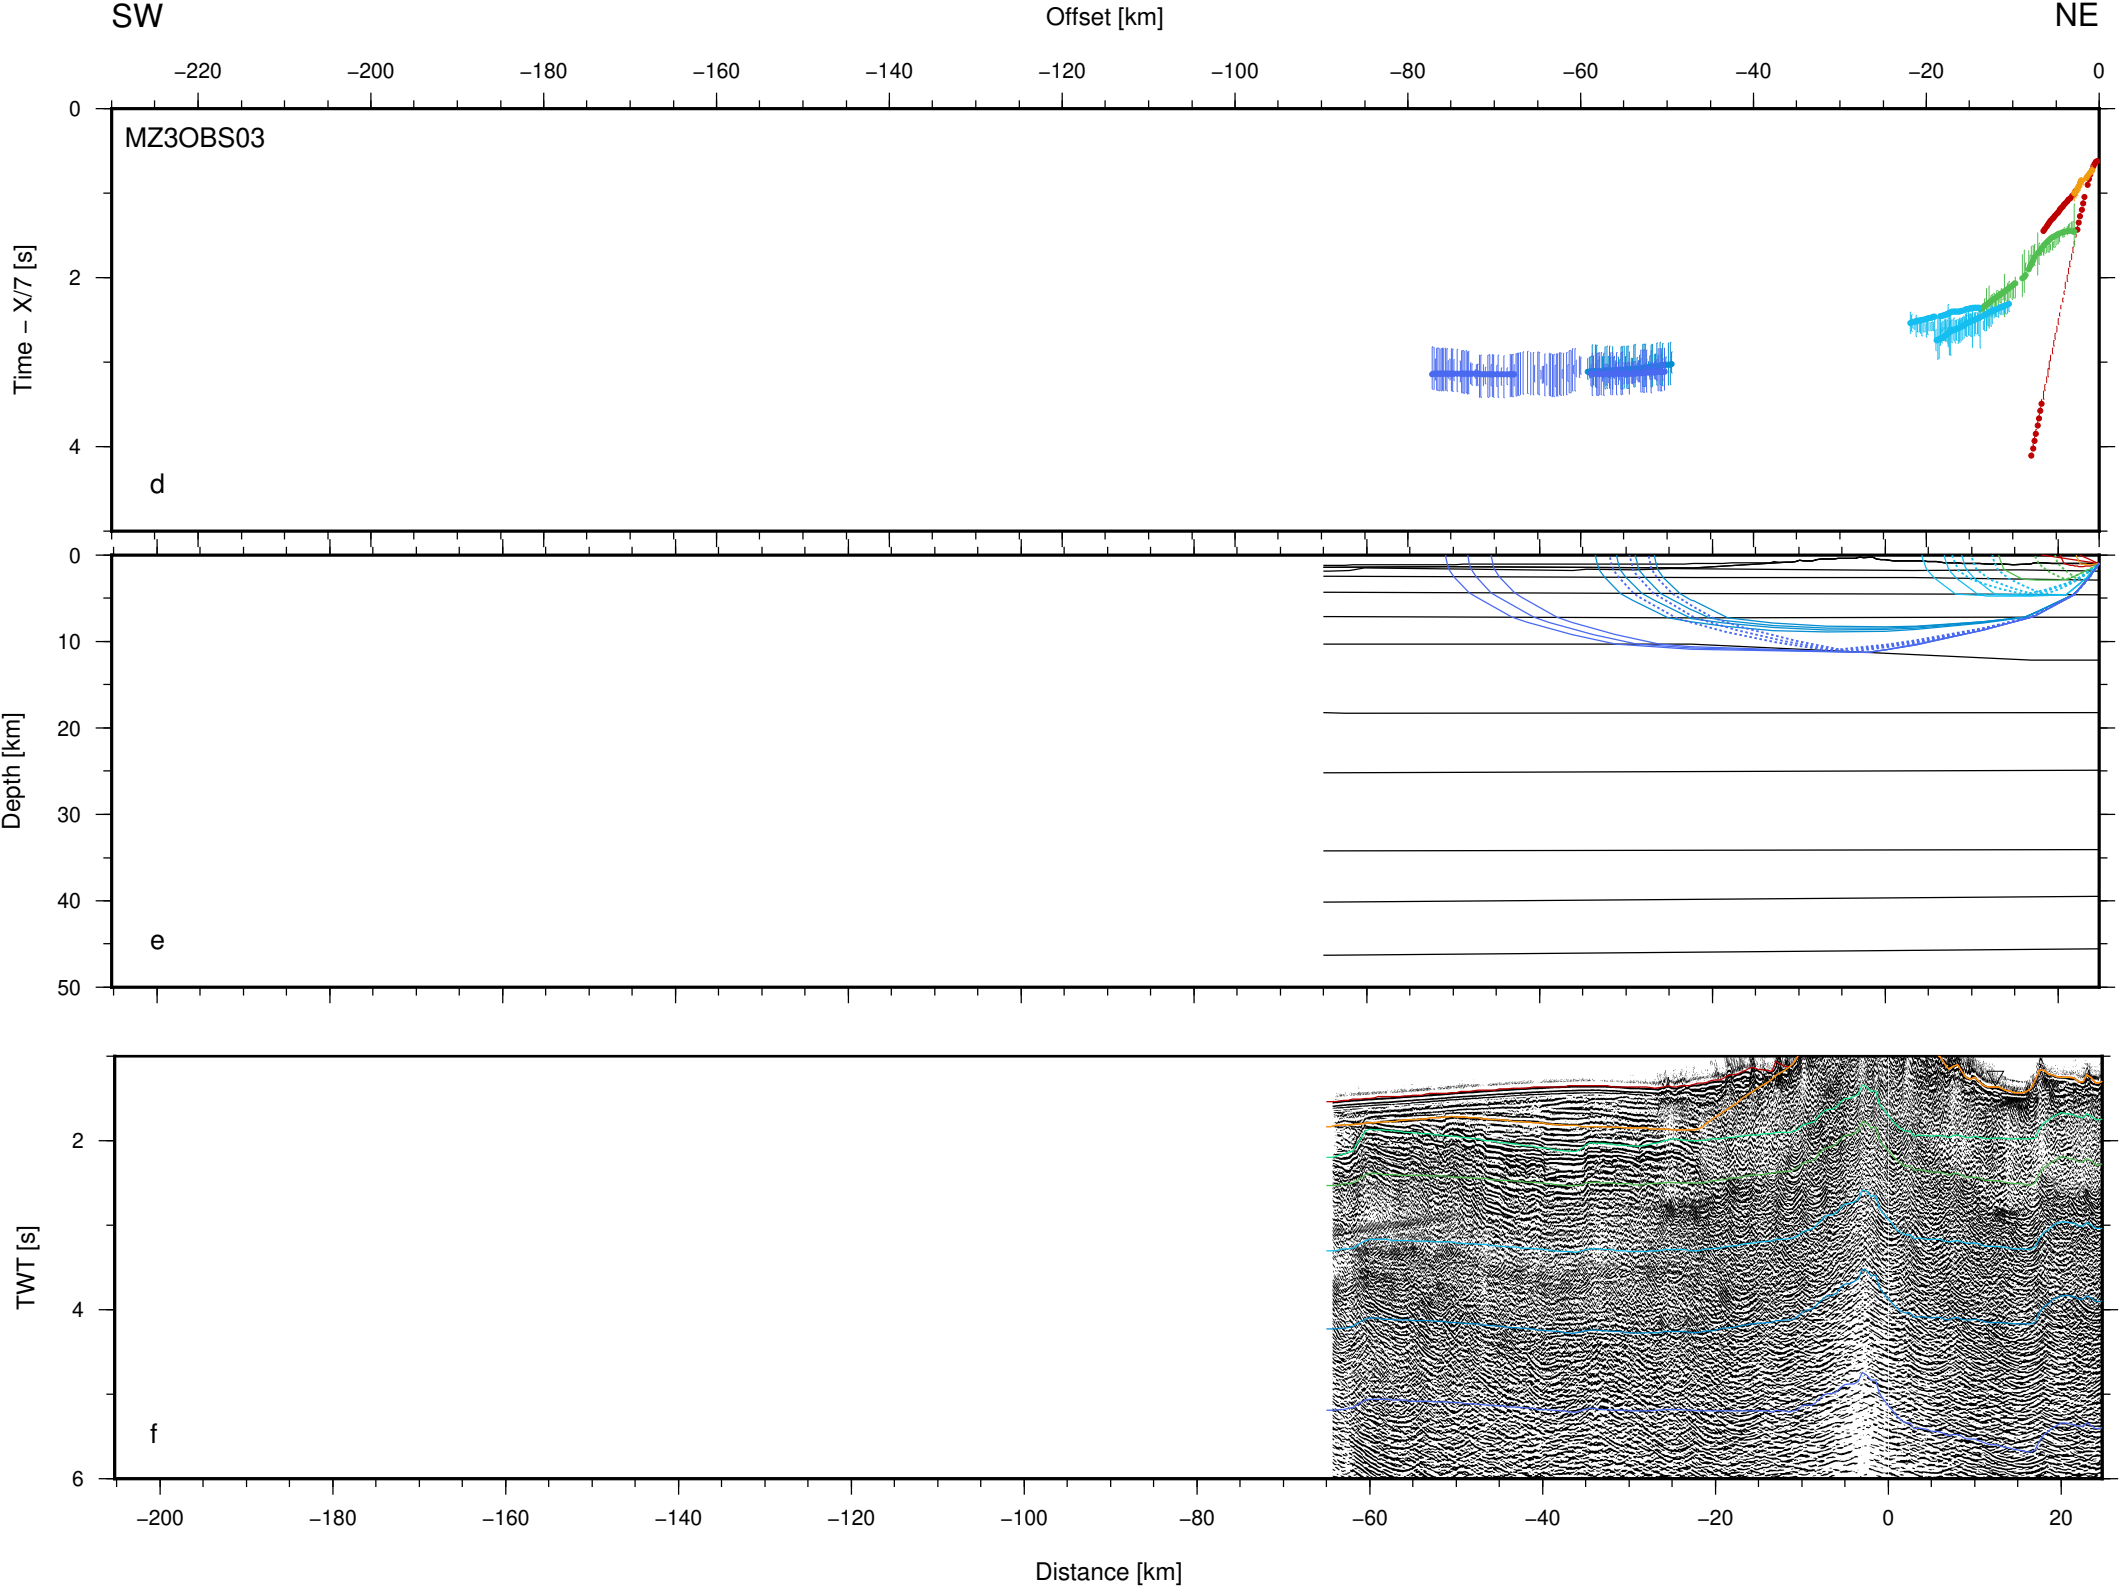



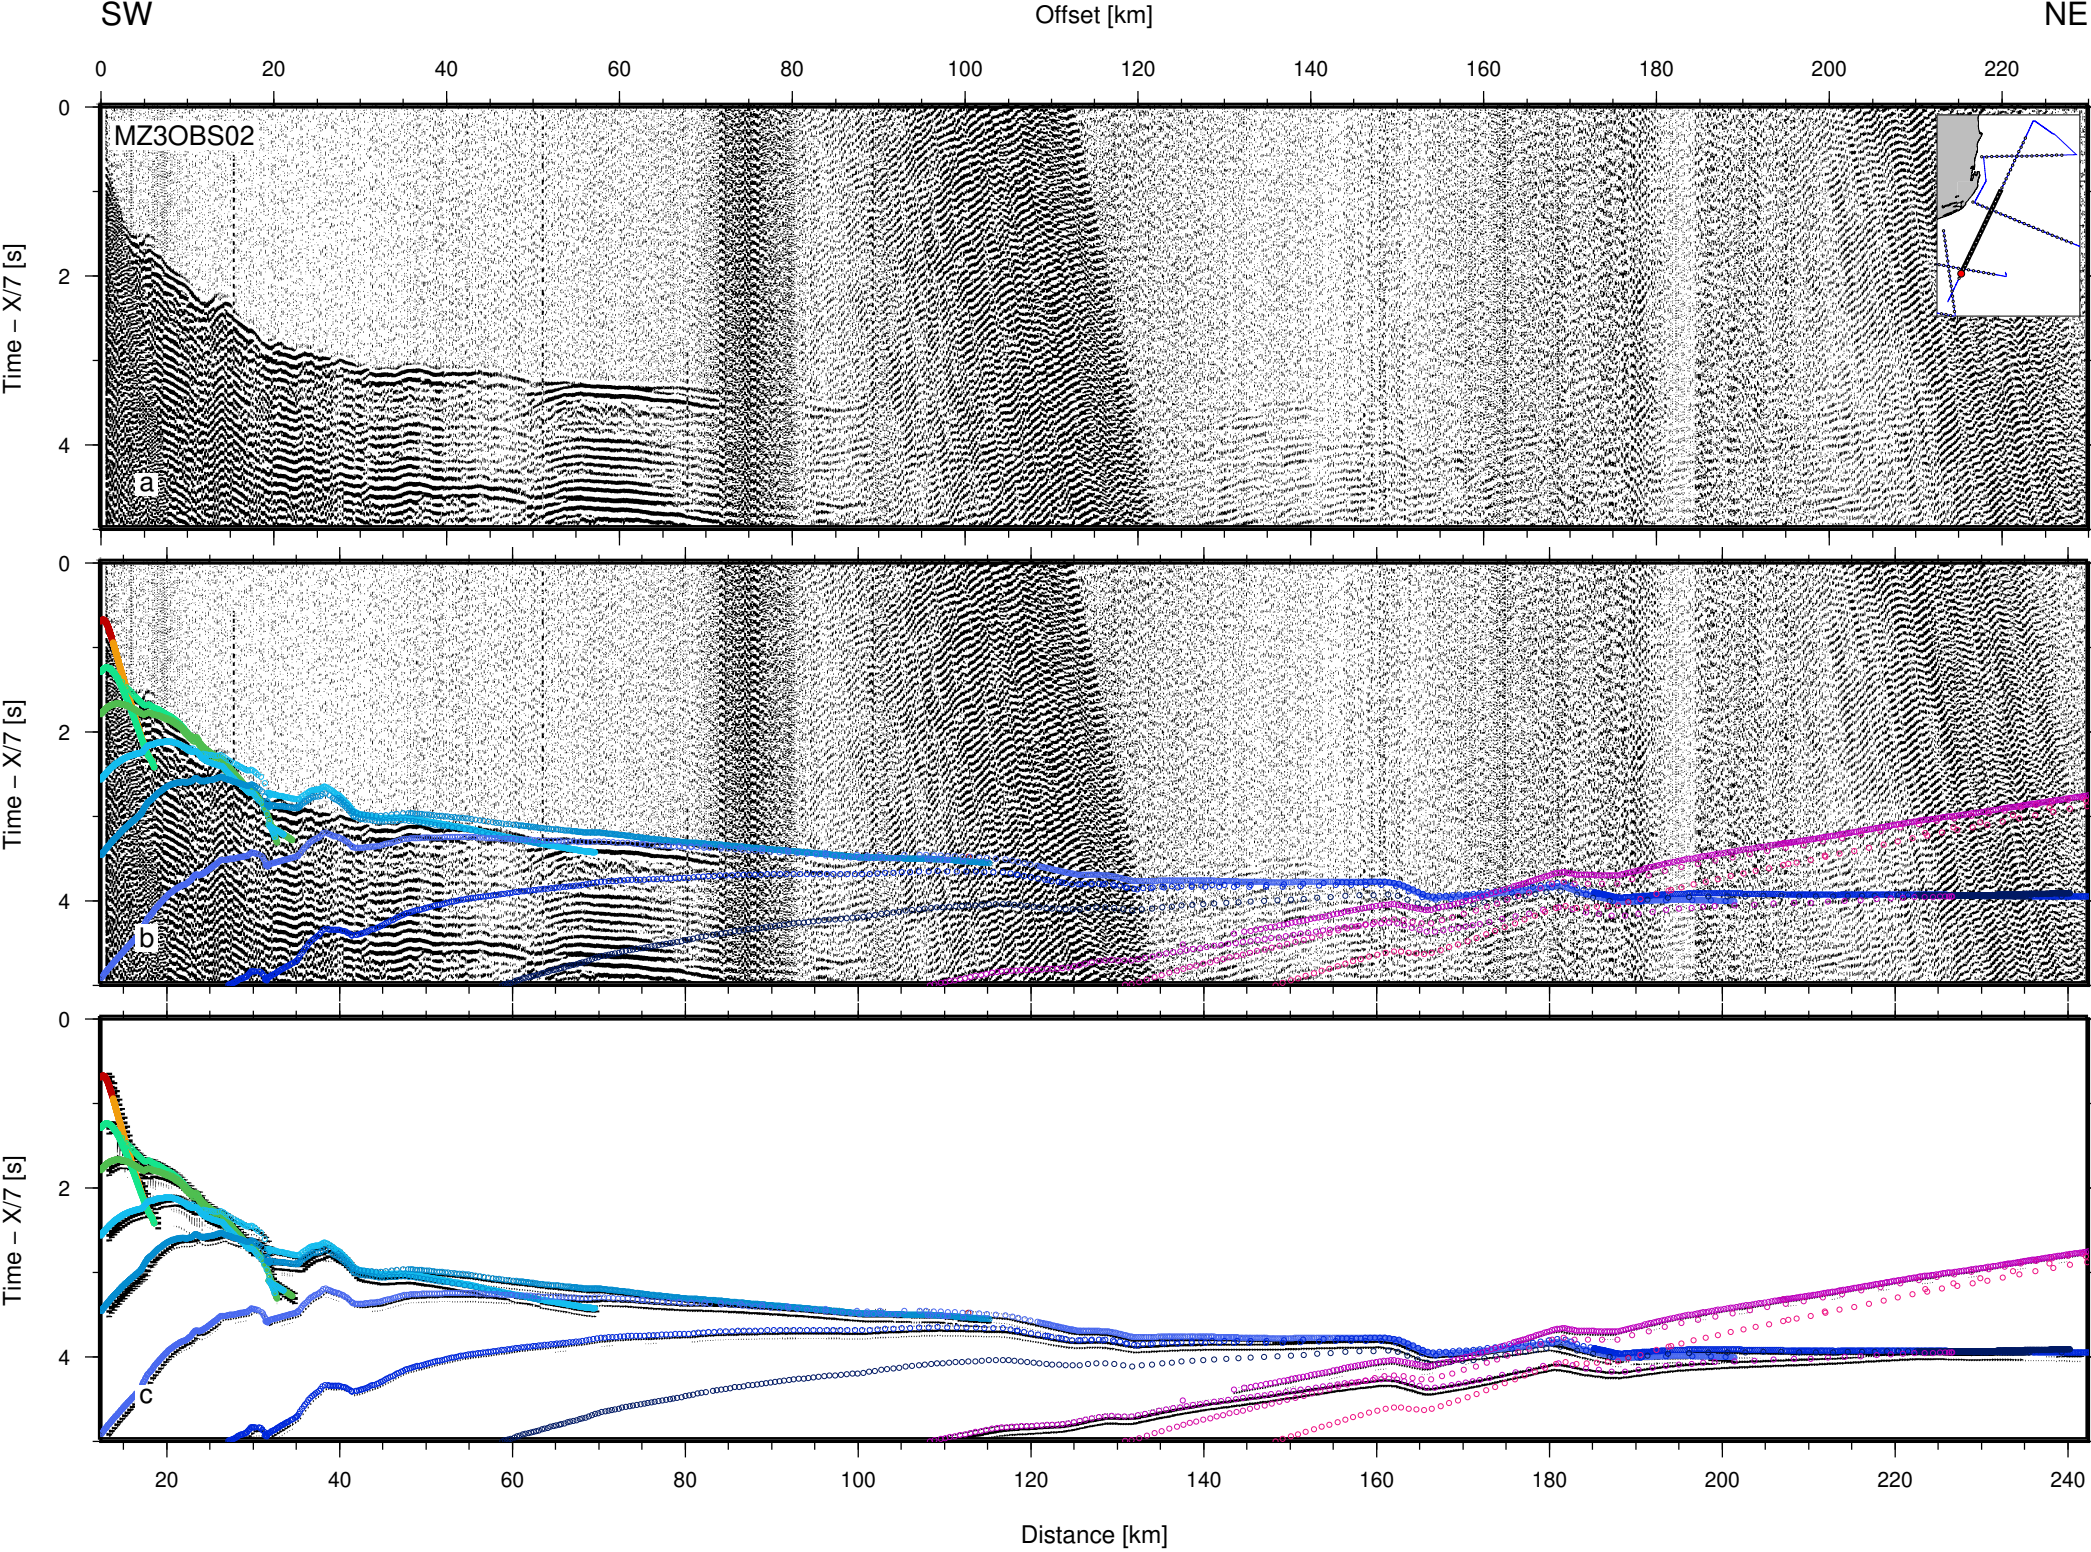



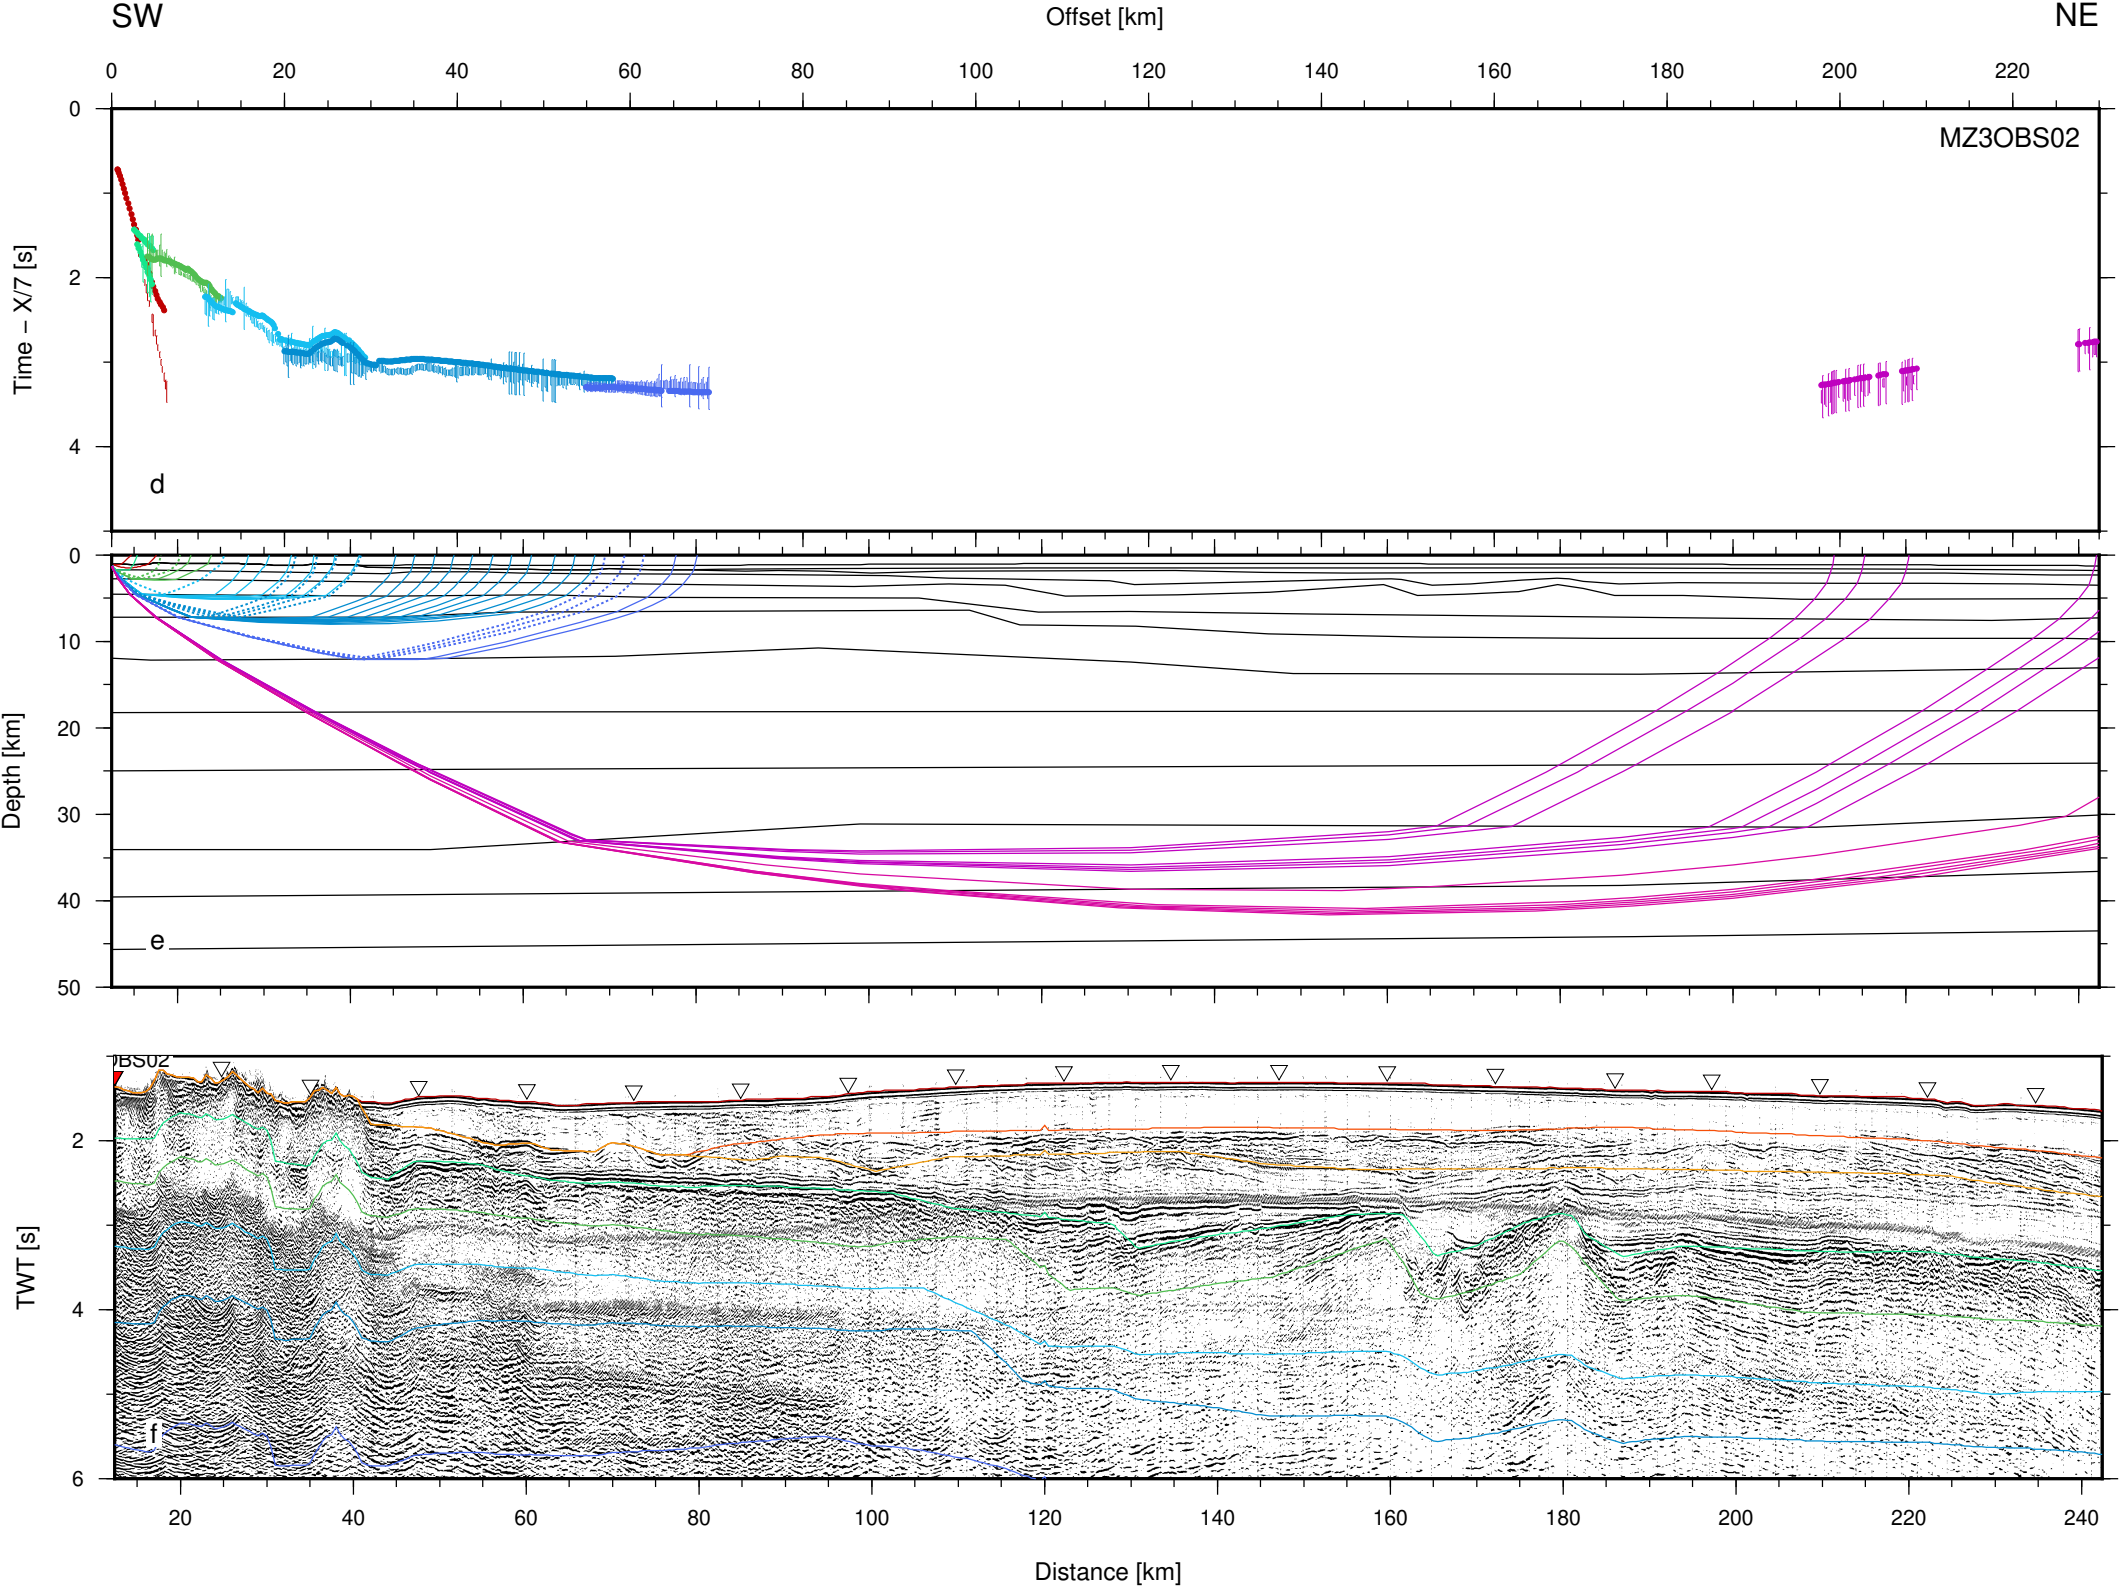



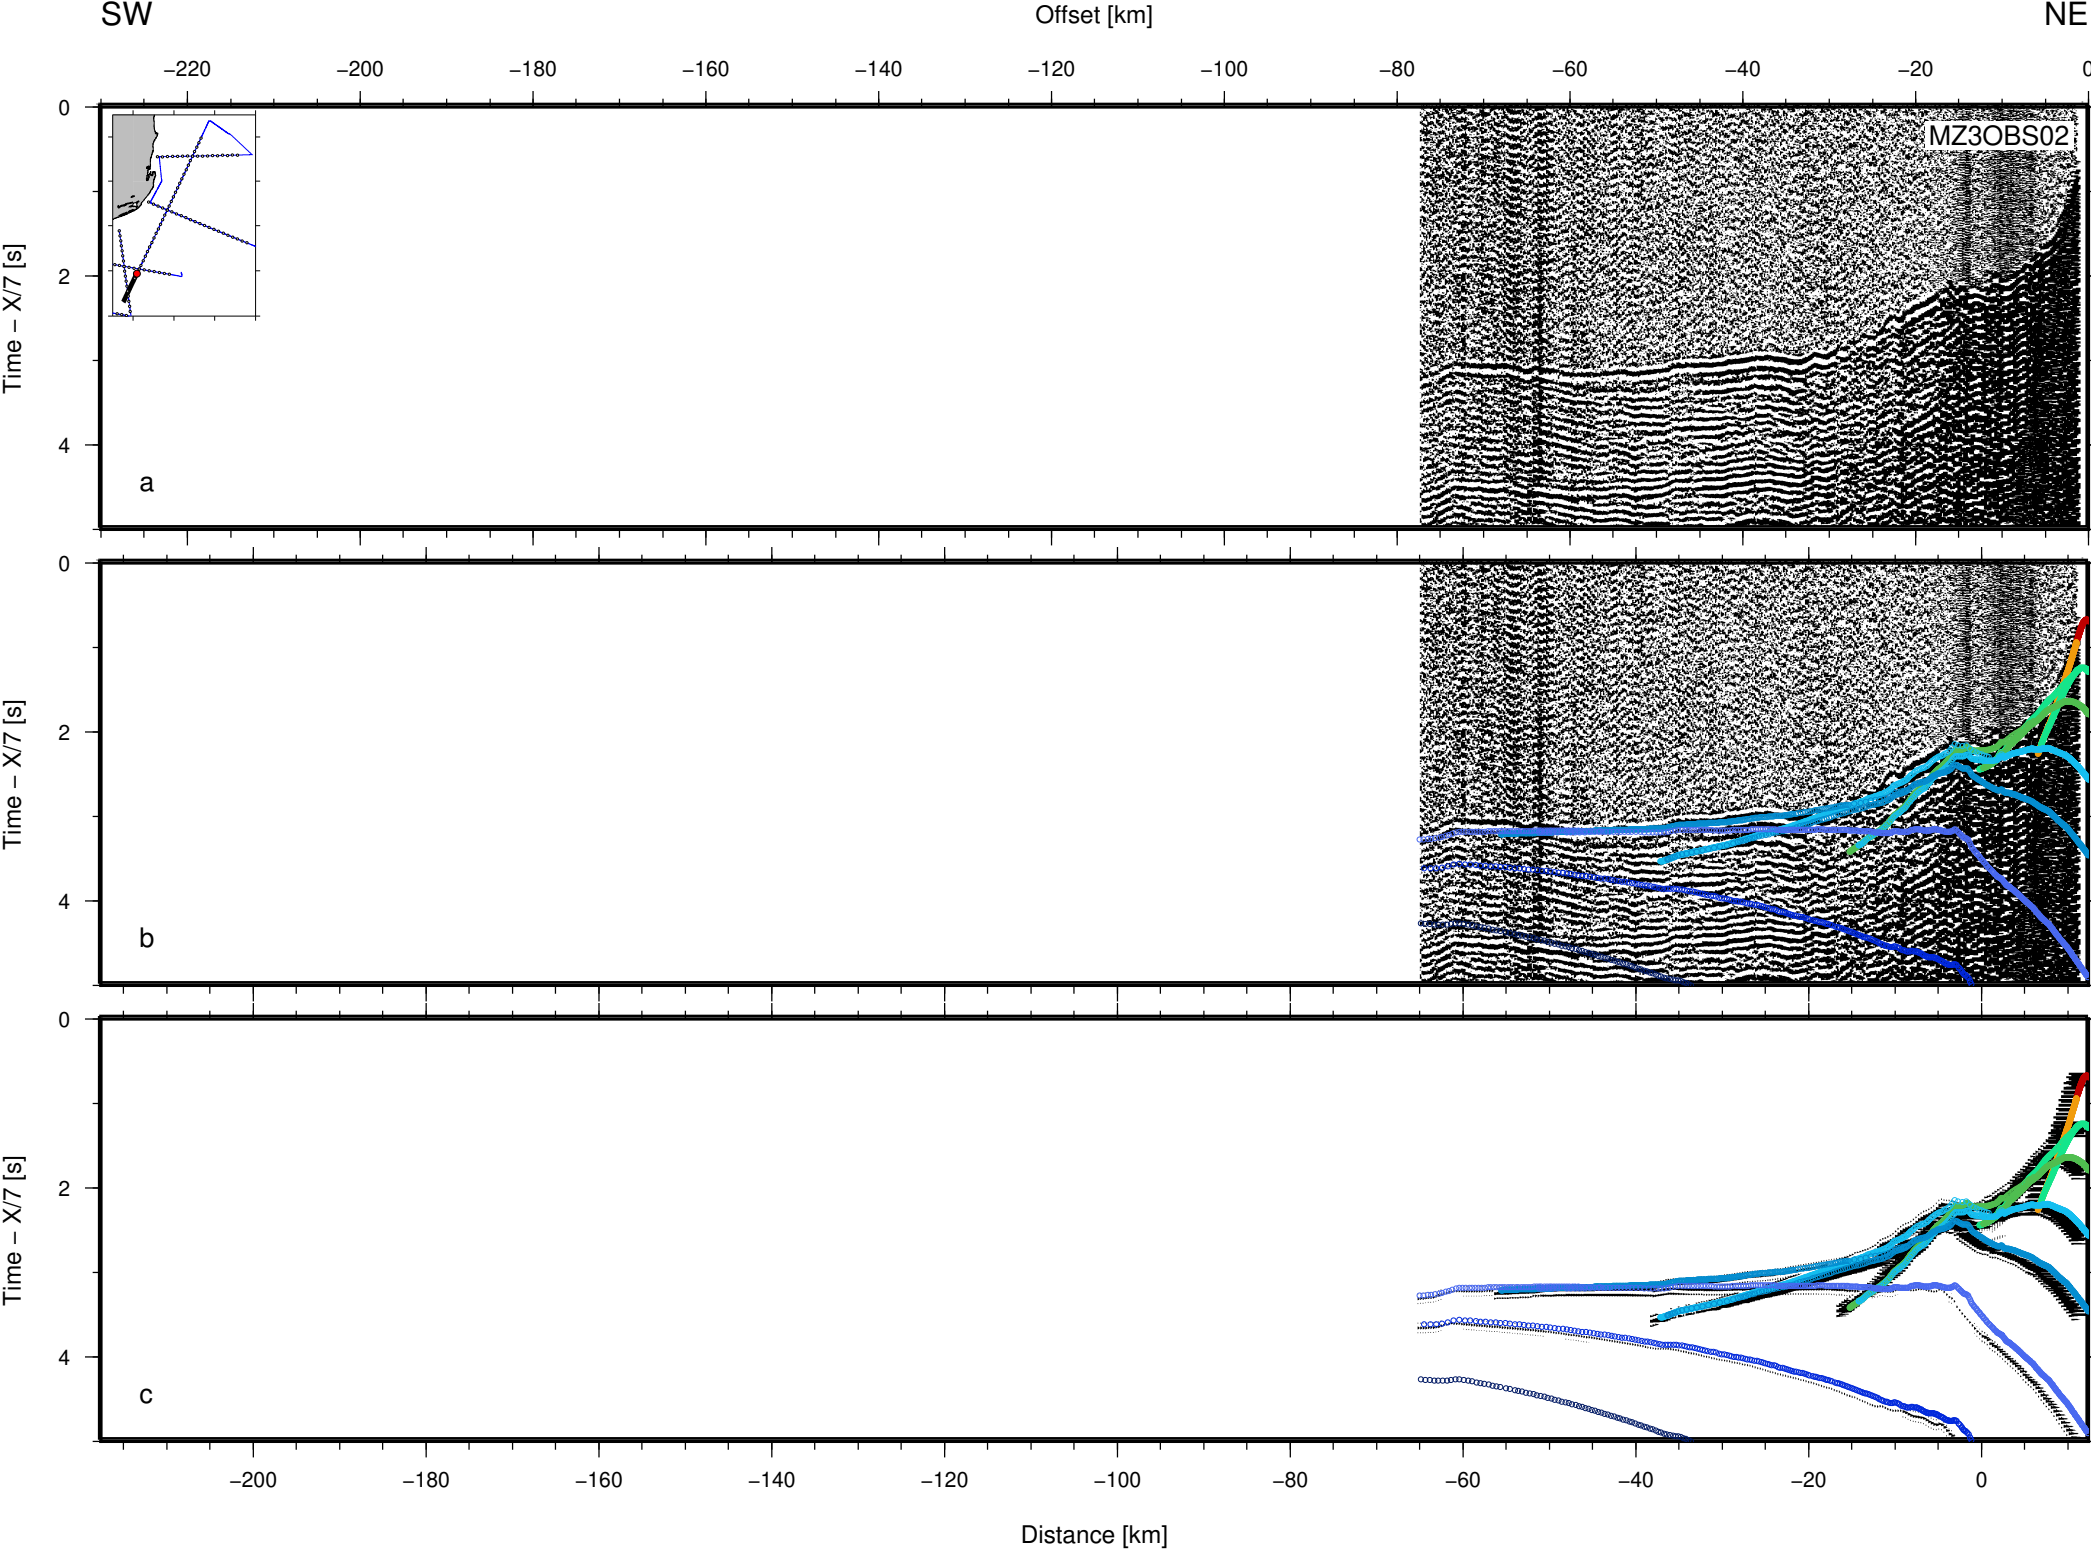

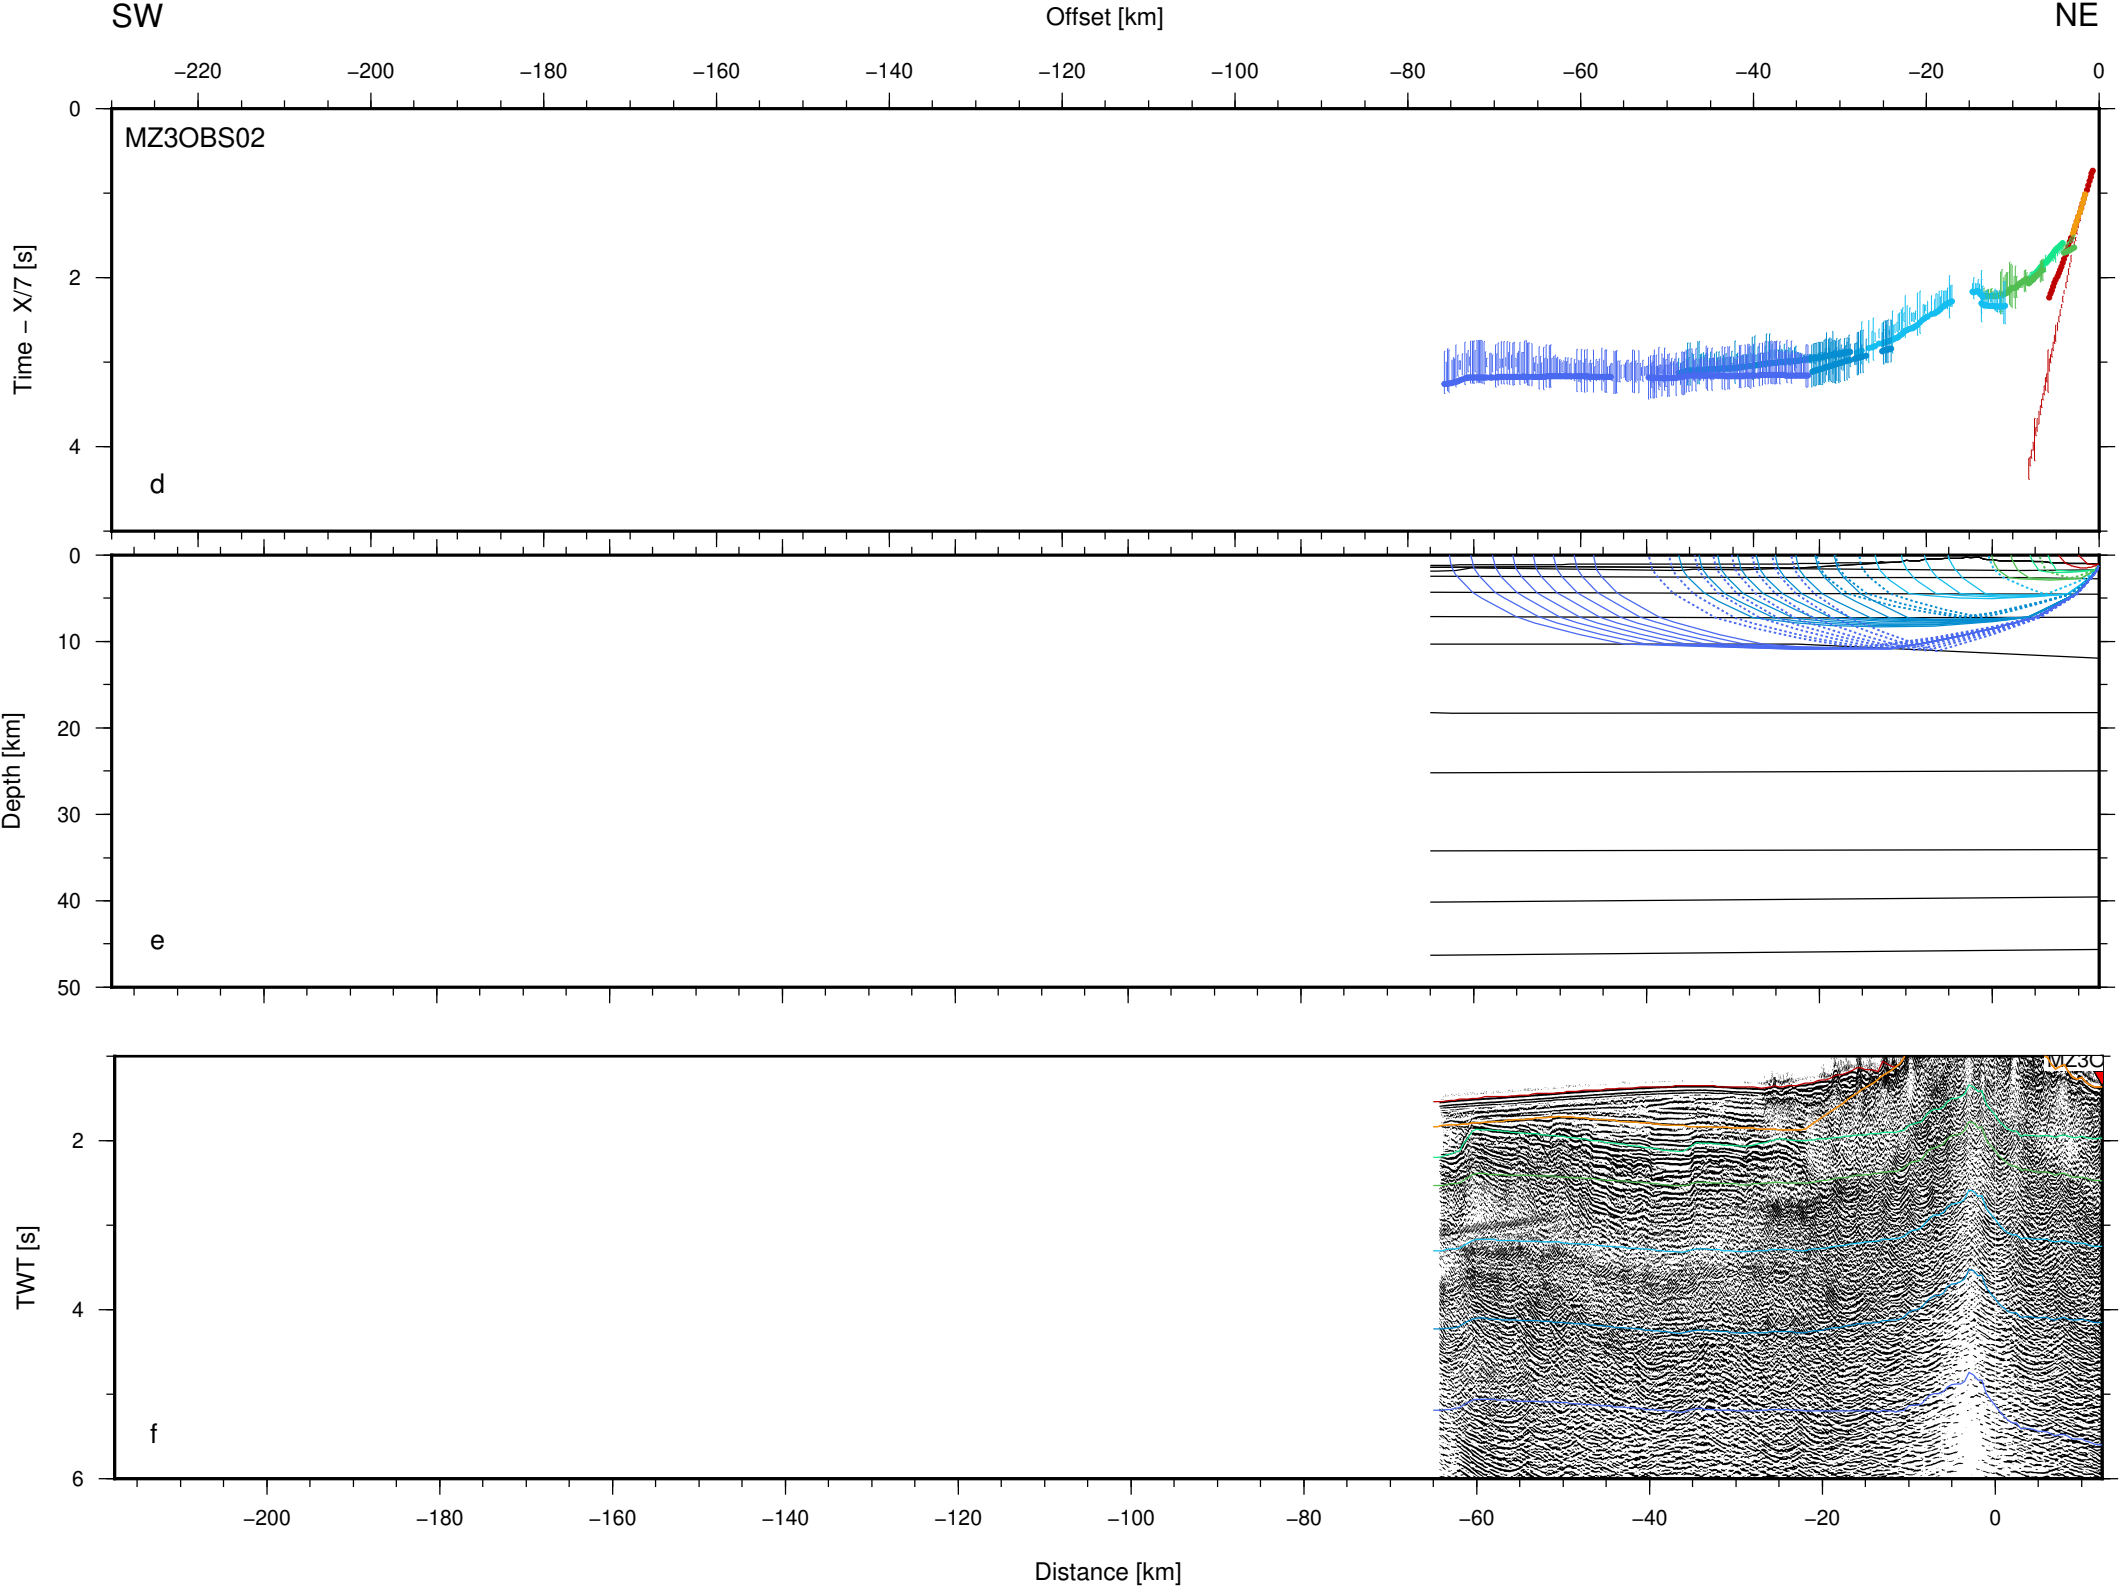



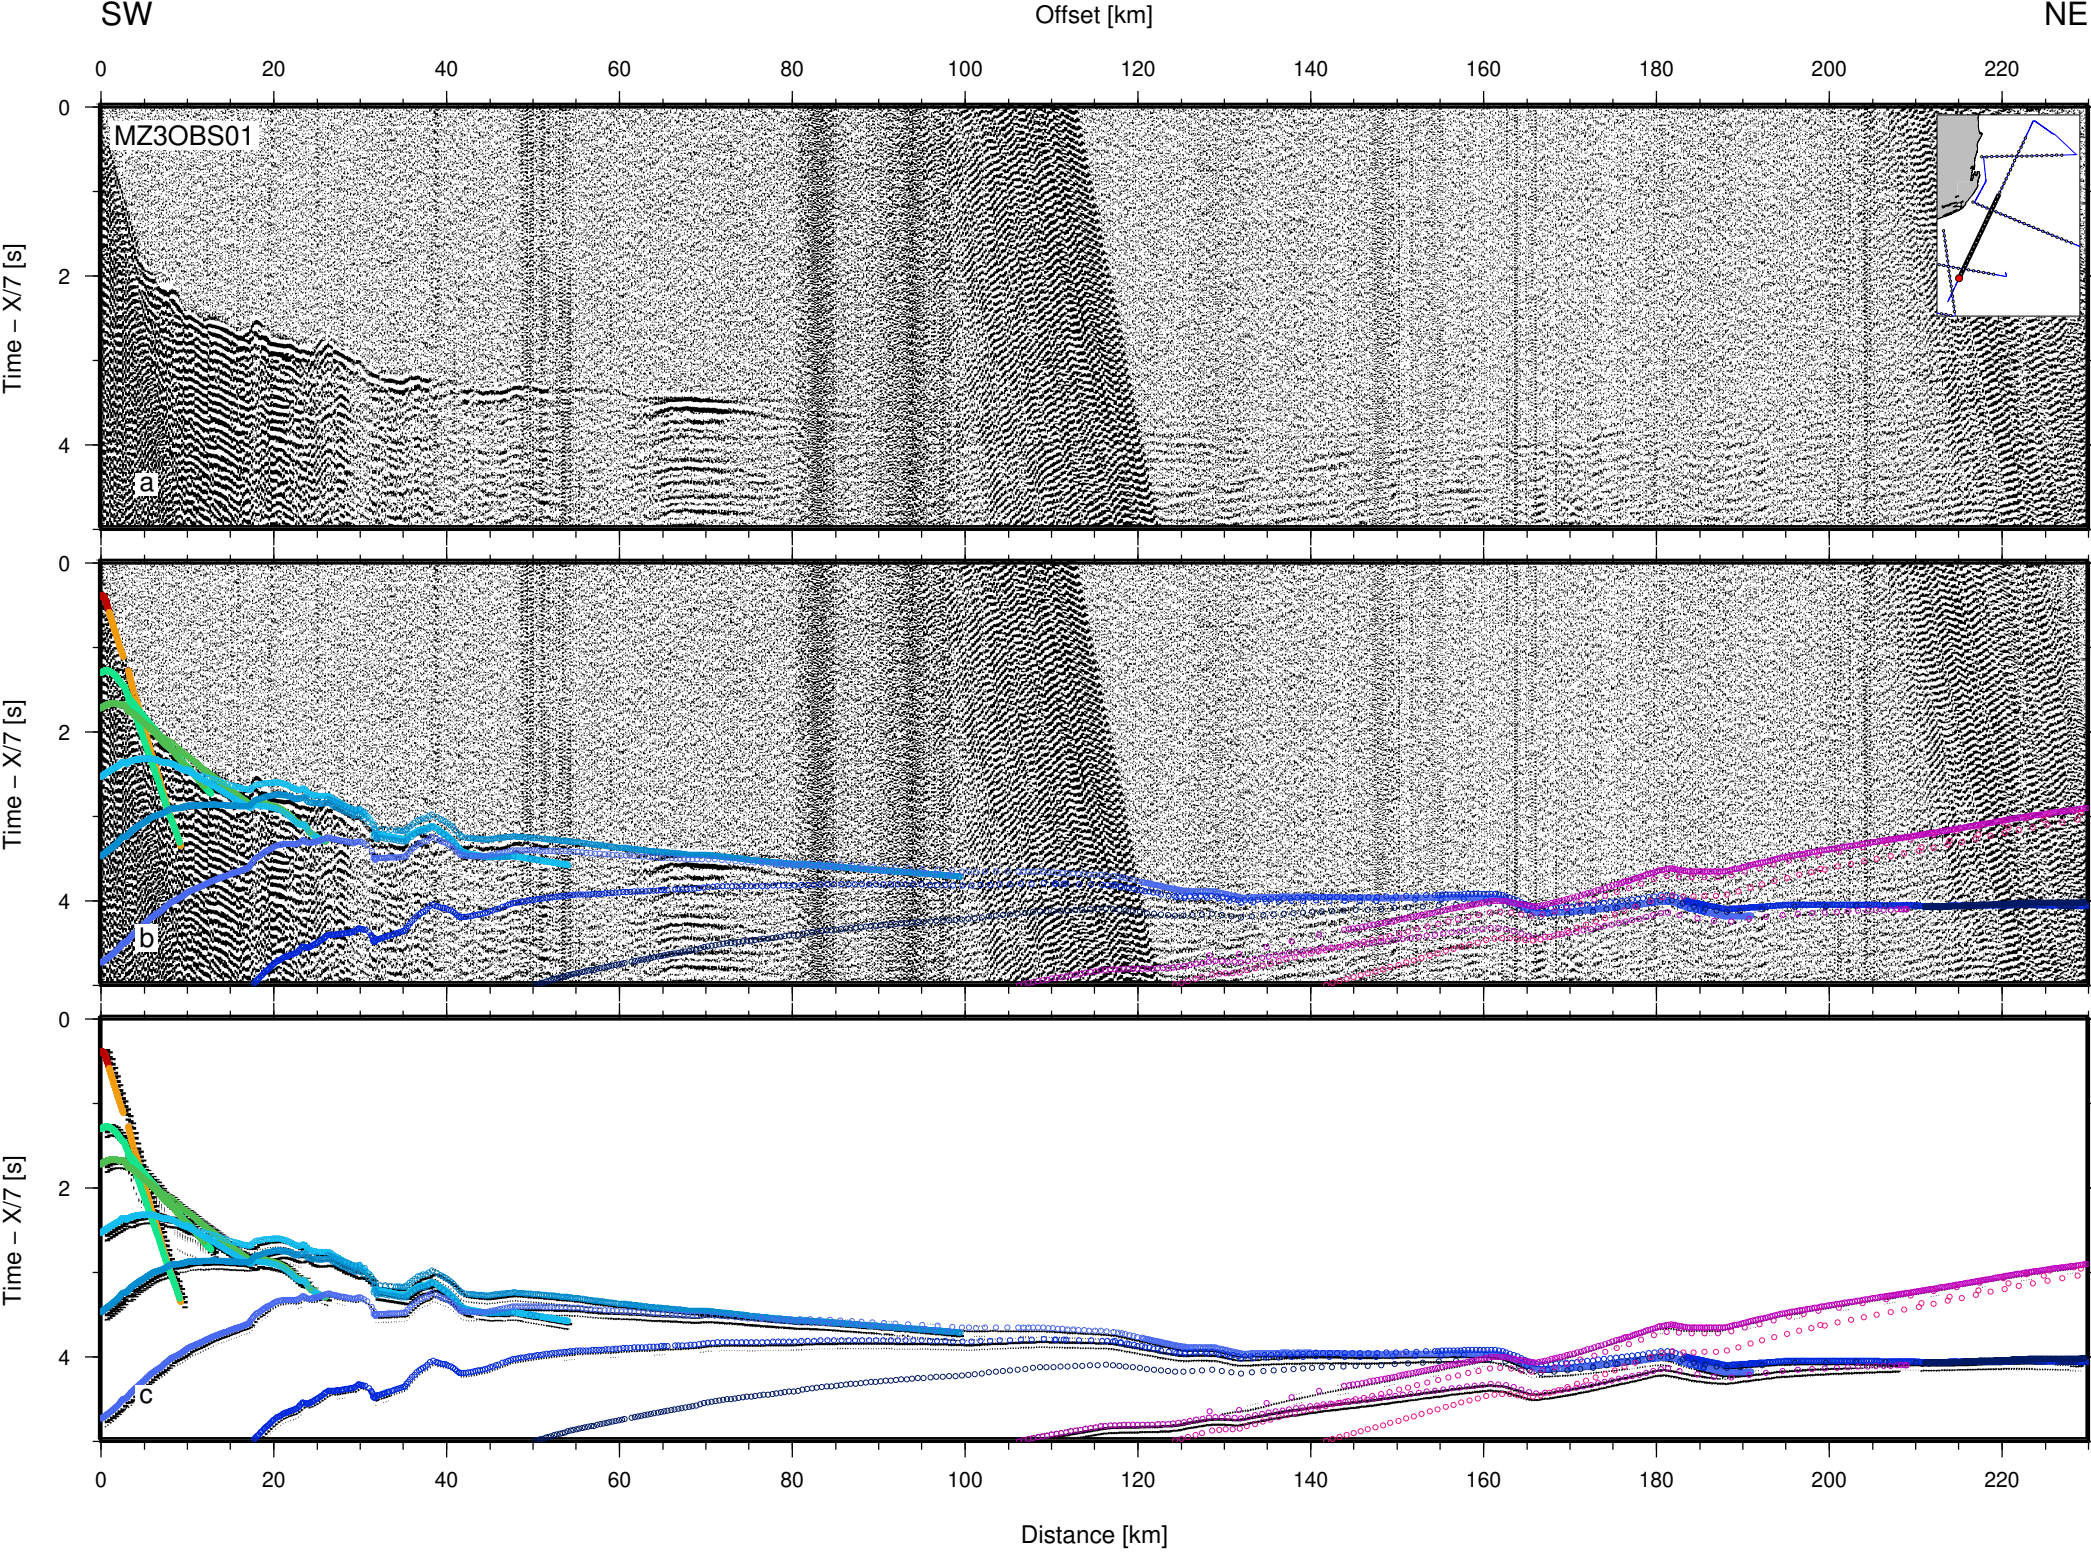



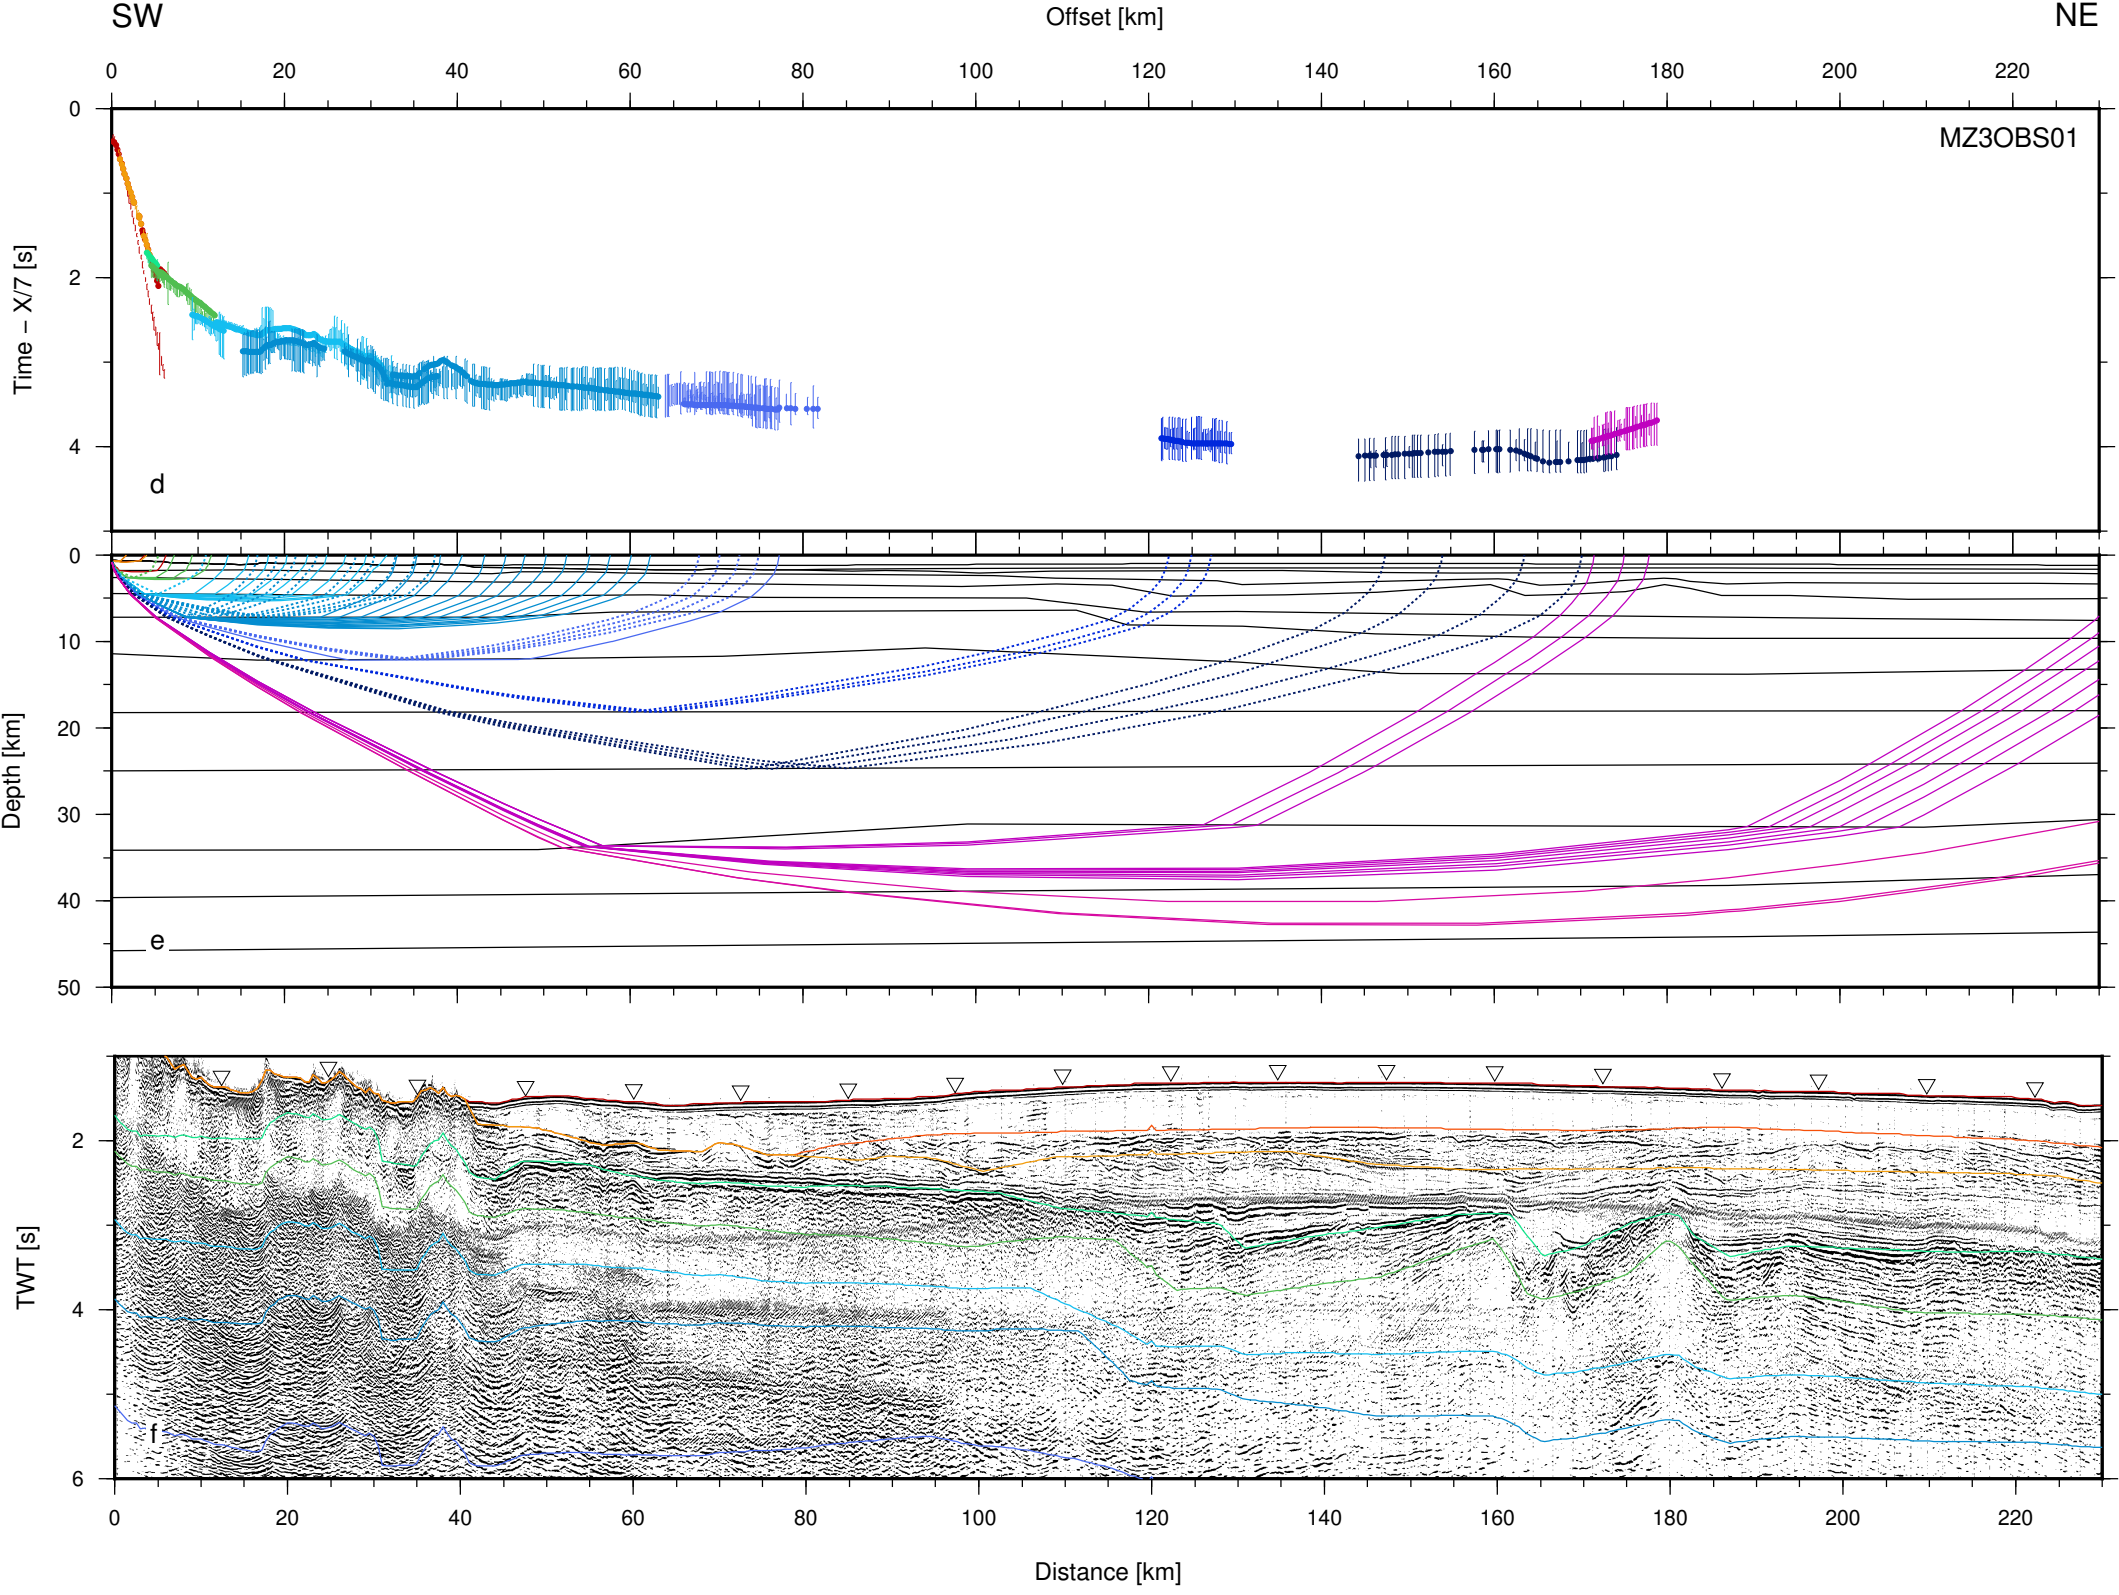





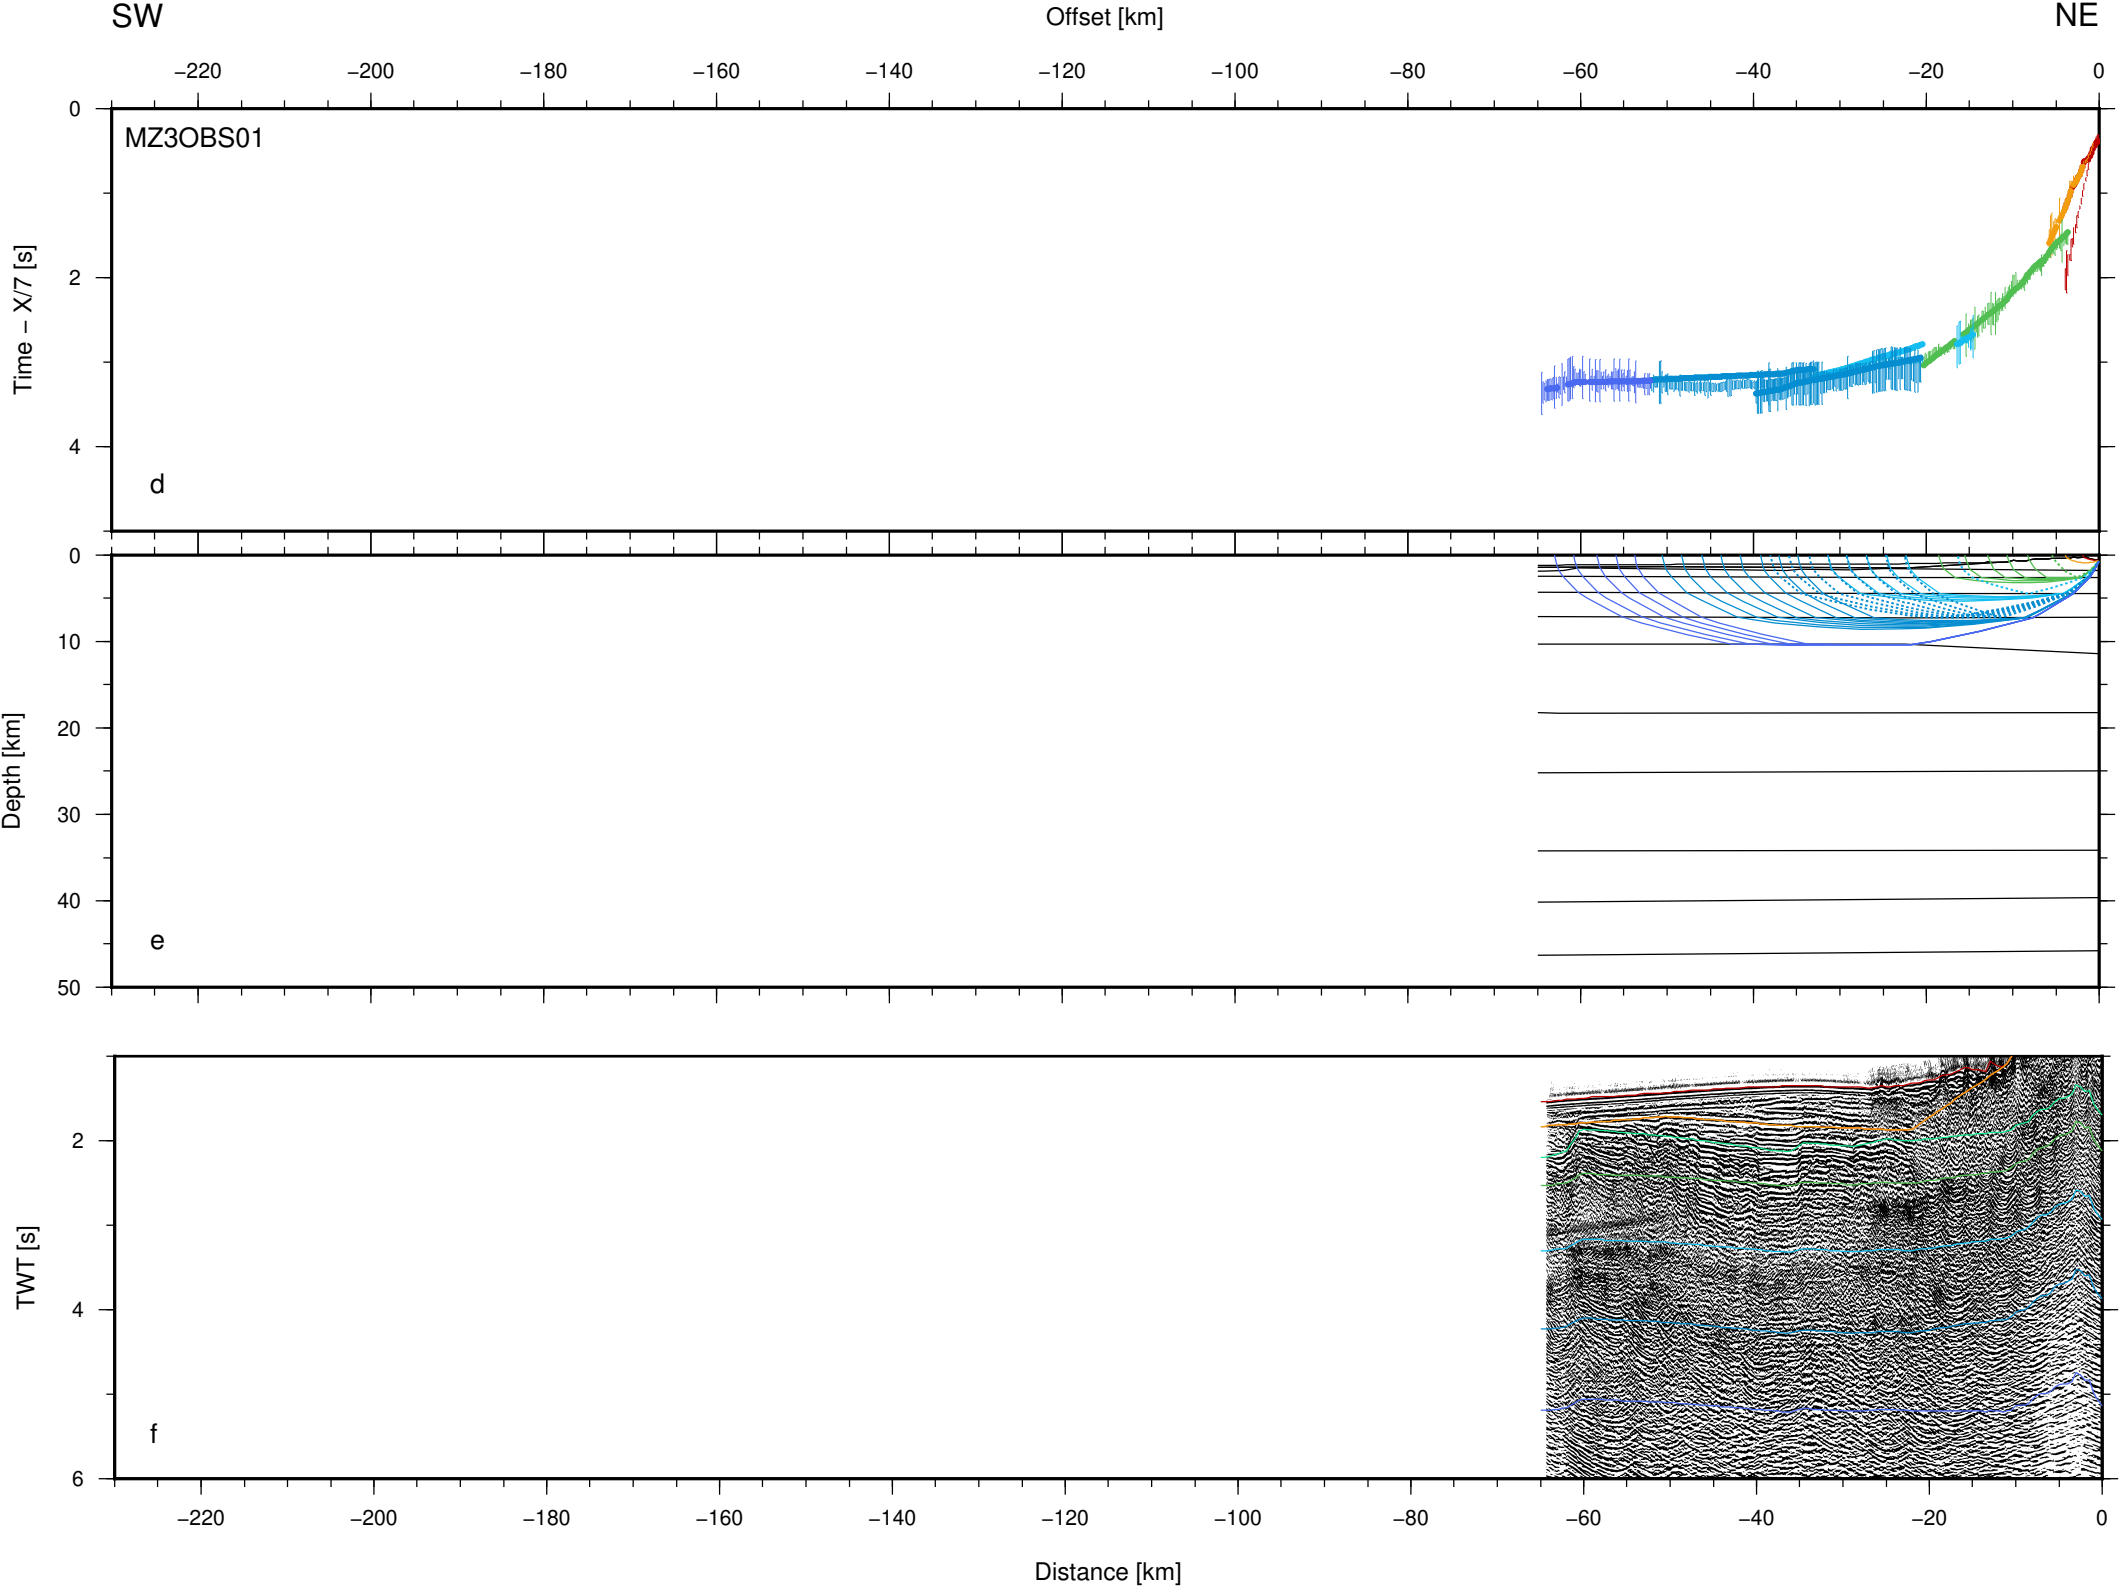



**Figure 3.** Normalized average model scores distribution every 20km along MZ3. On each panel, a) and c) represent cross-sections of normalized average score distribution at selected depths and velocities respectively as shown in a) with letter correspondence. Black horizontal dashed lines indicate 95% of the maximum normalized average score and are used to estimate uncertainties. This level corresponds to the score of a model capable of tracing 95% of the original number of rays and with an increase of 5% of the original  $\chi^2$ . b) Average model score distribution of the entire dataset. Thin dashed lines mark fixed parameter bounds. Solid black line indicates tested model. Letters mark locations of the horizontal and vertical cross-sections shown in a) and c).

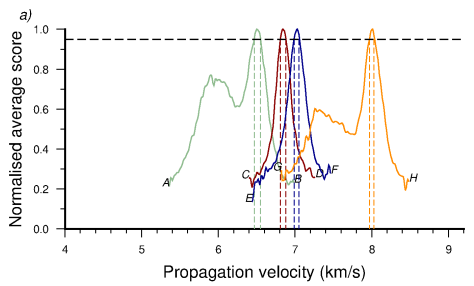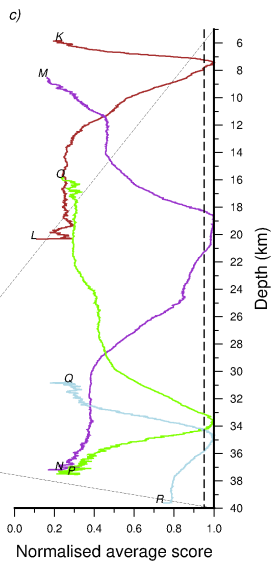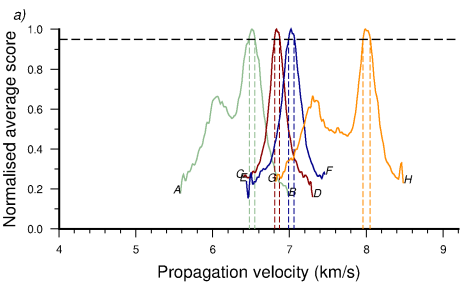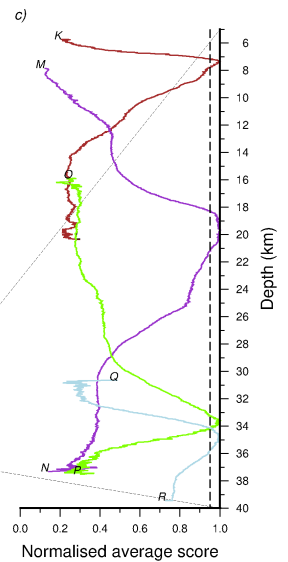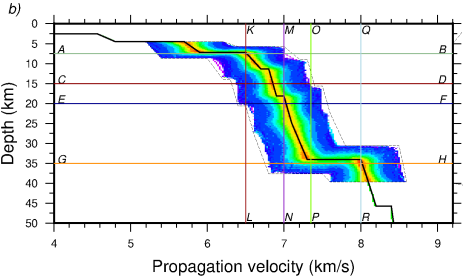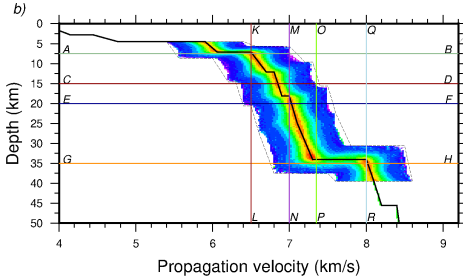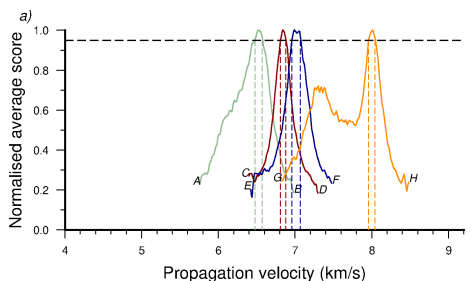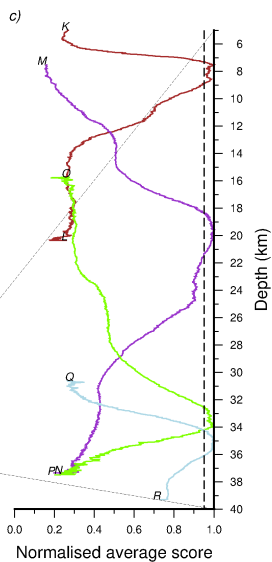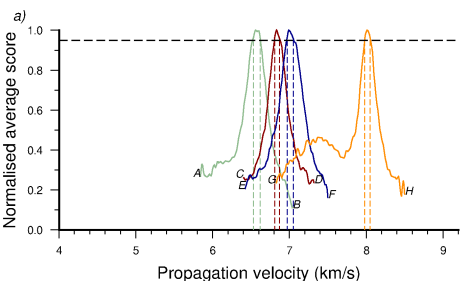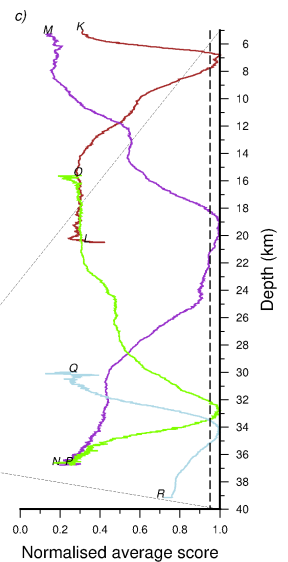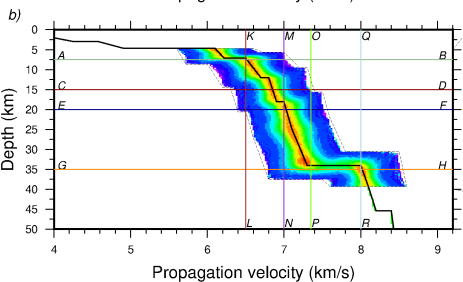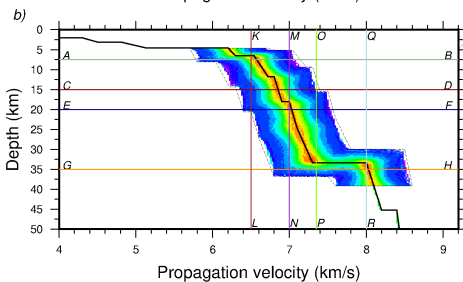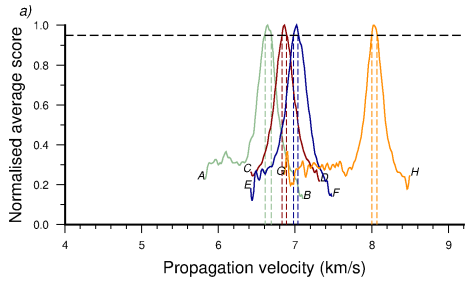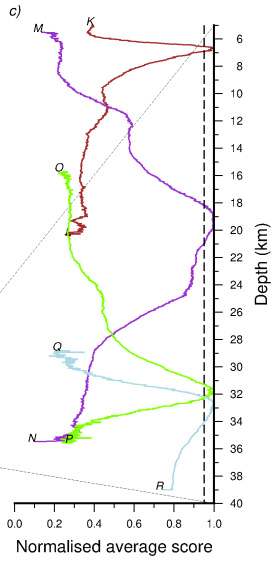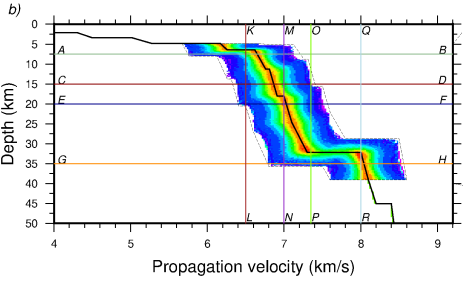



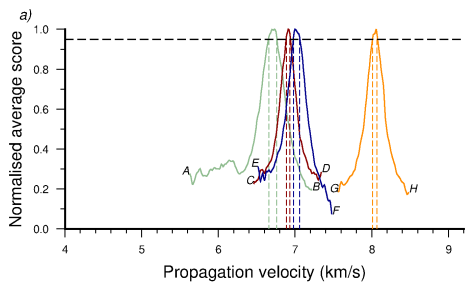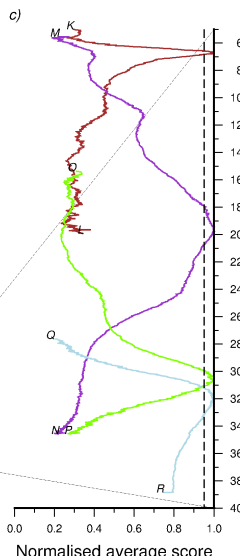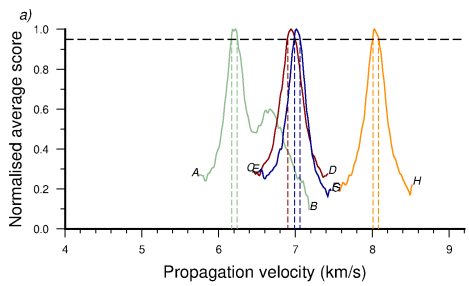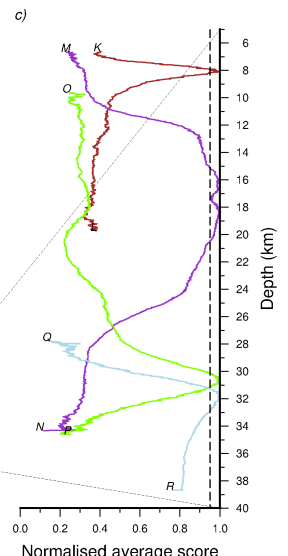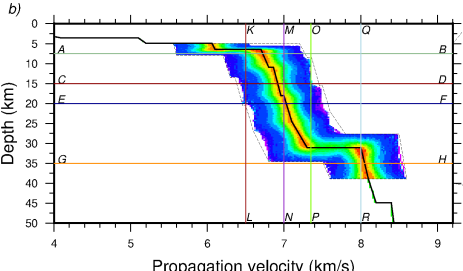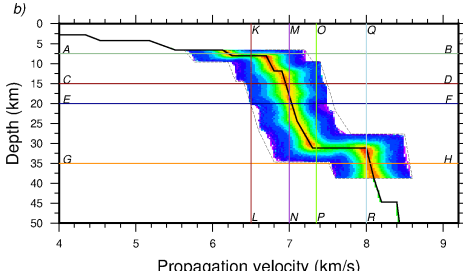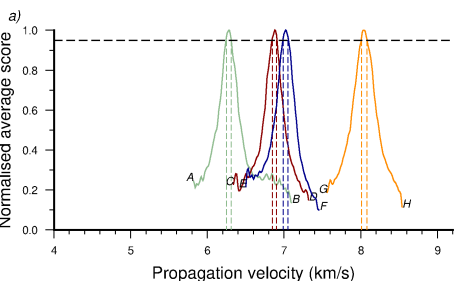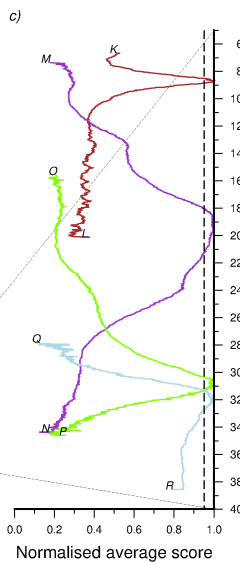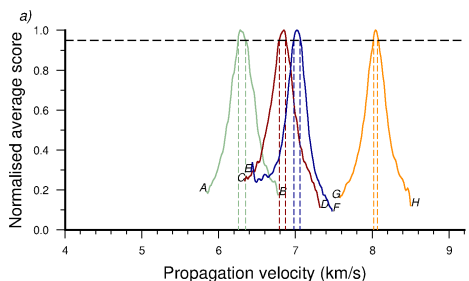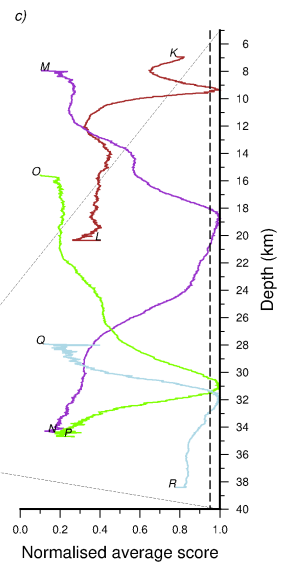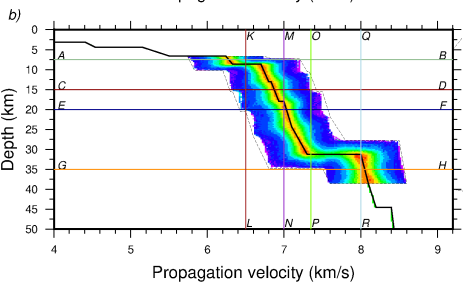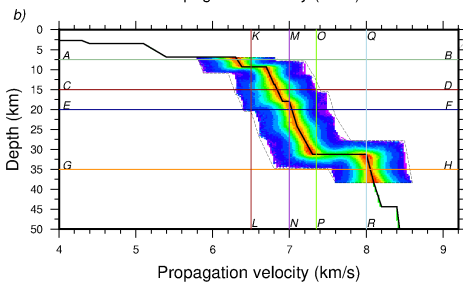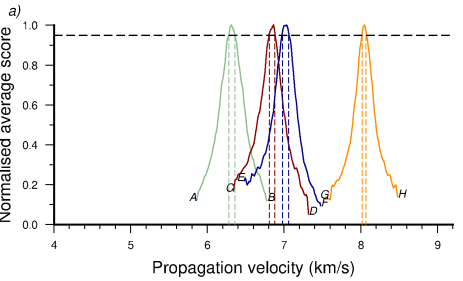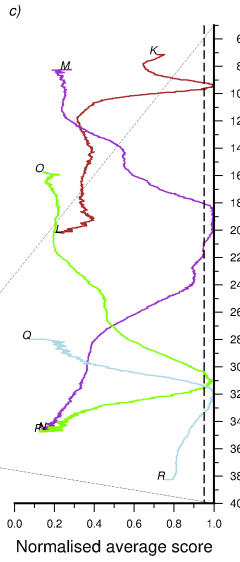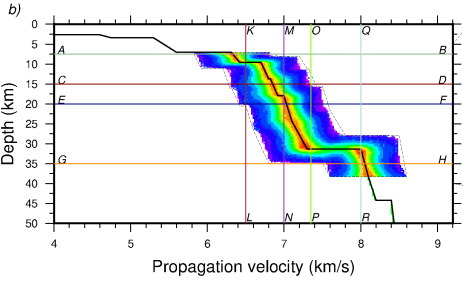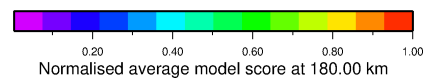

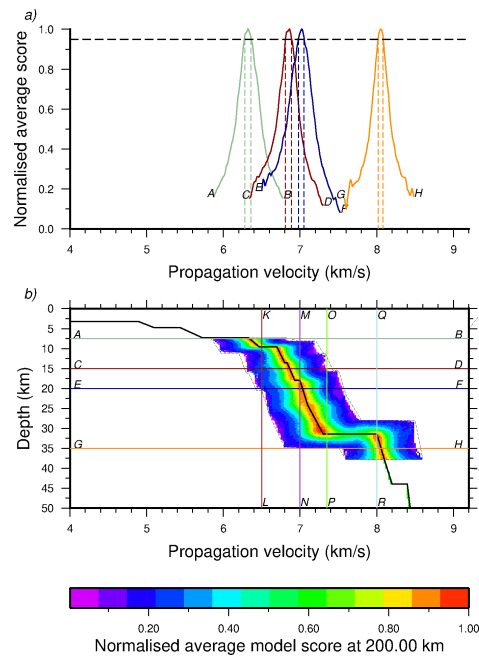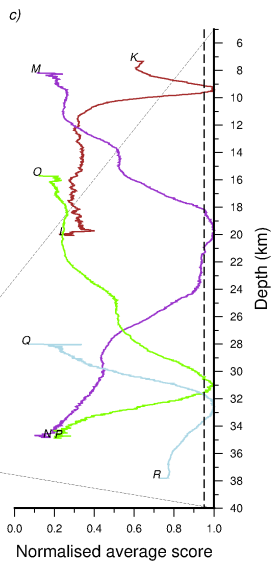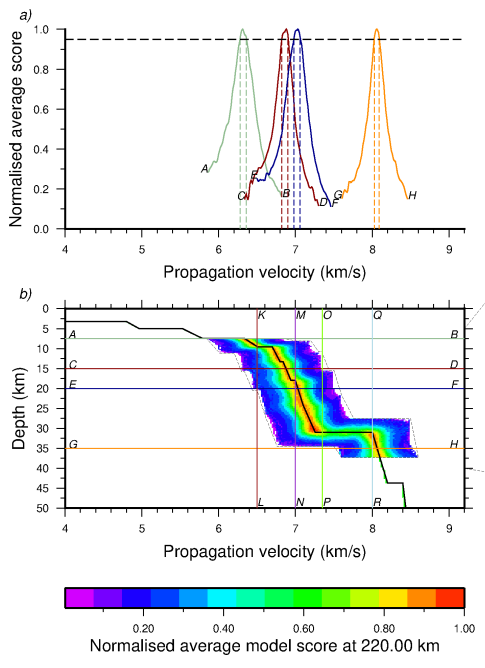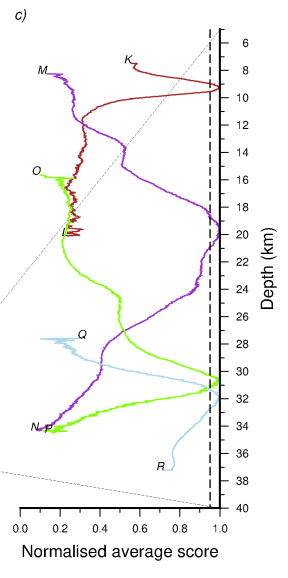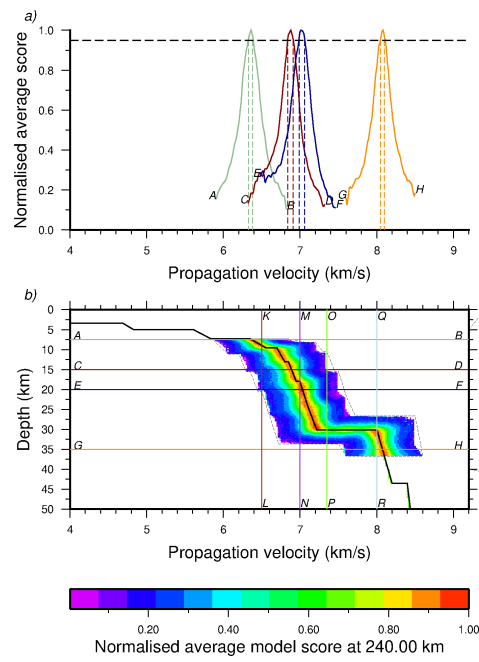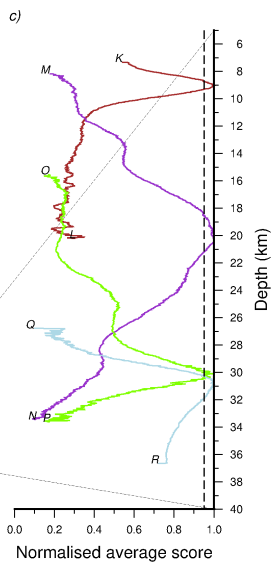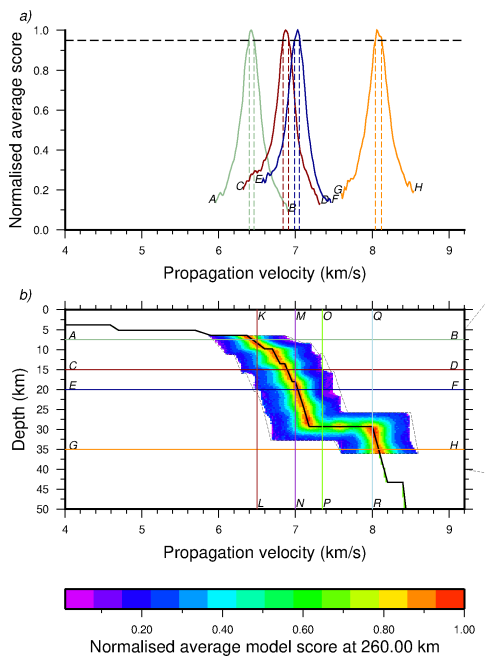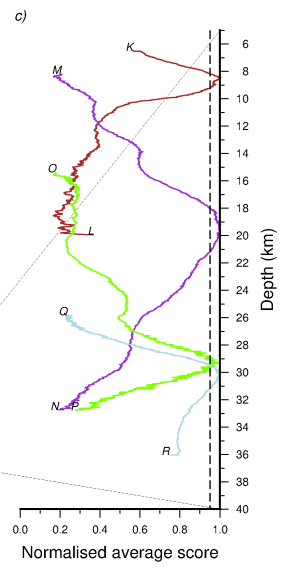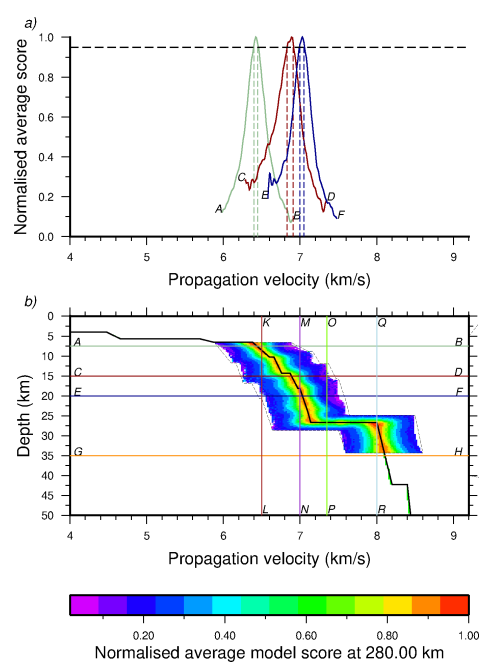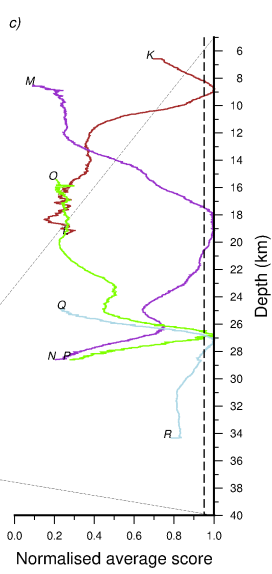



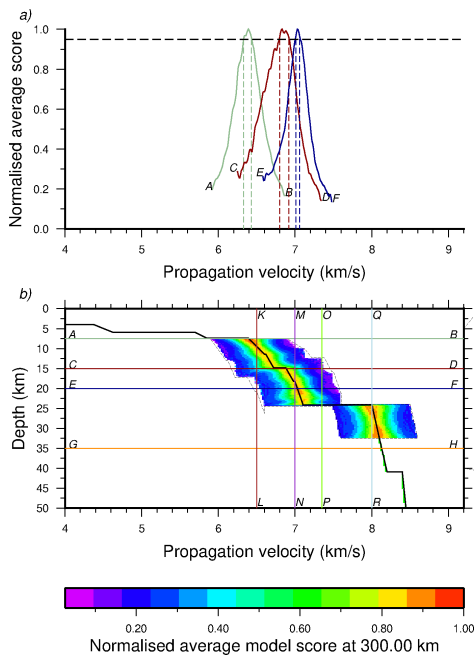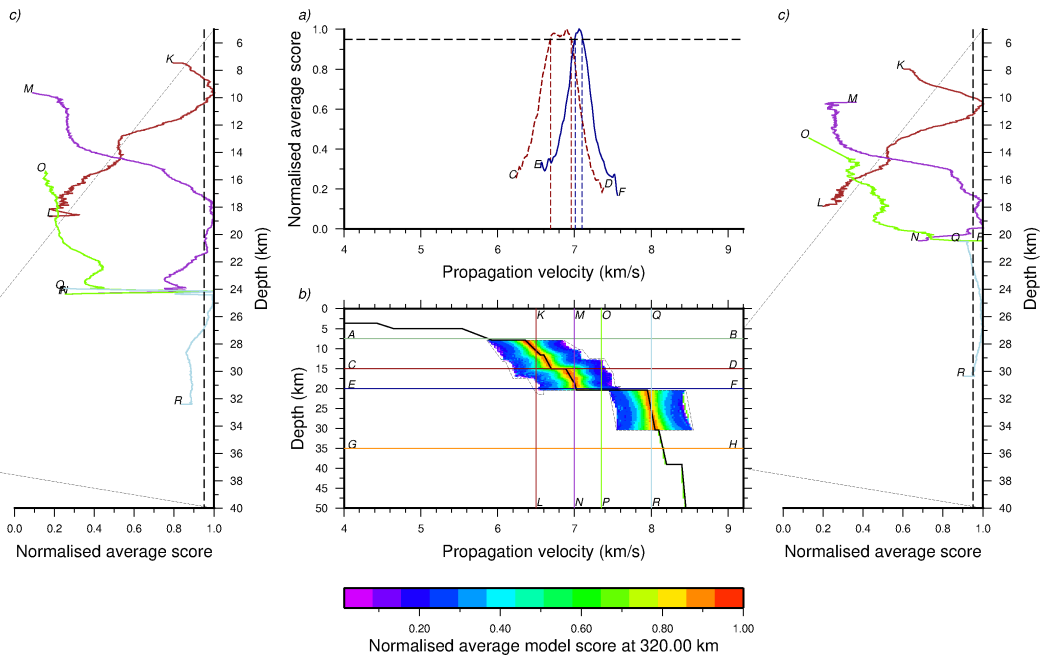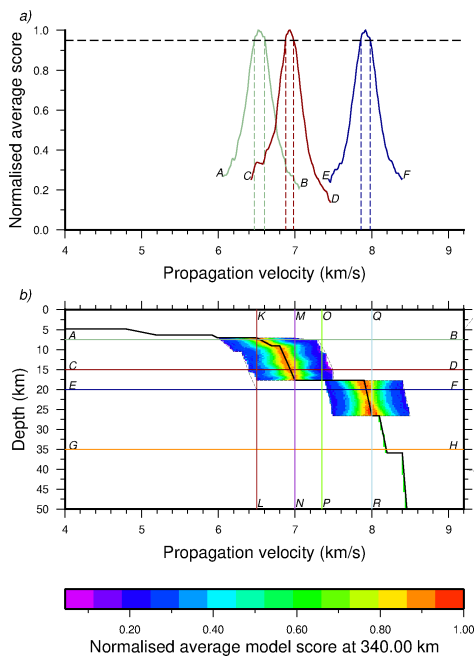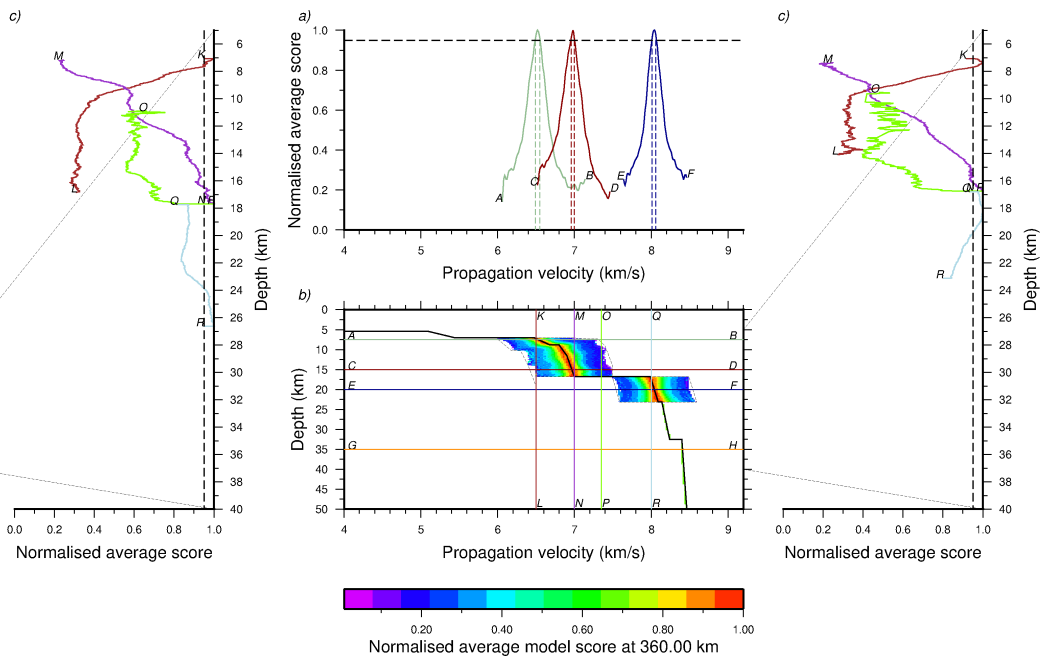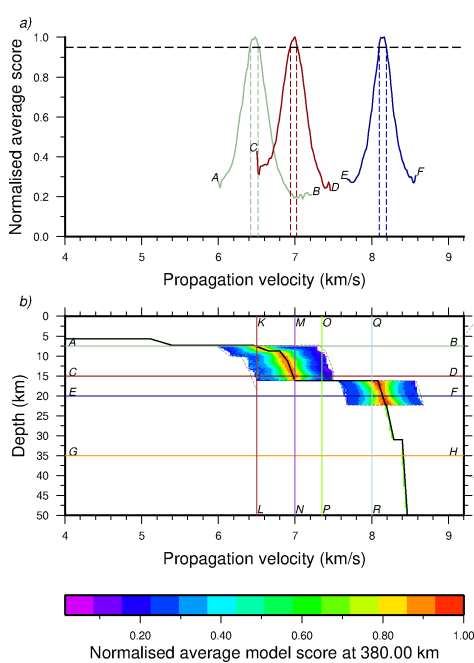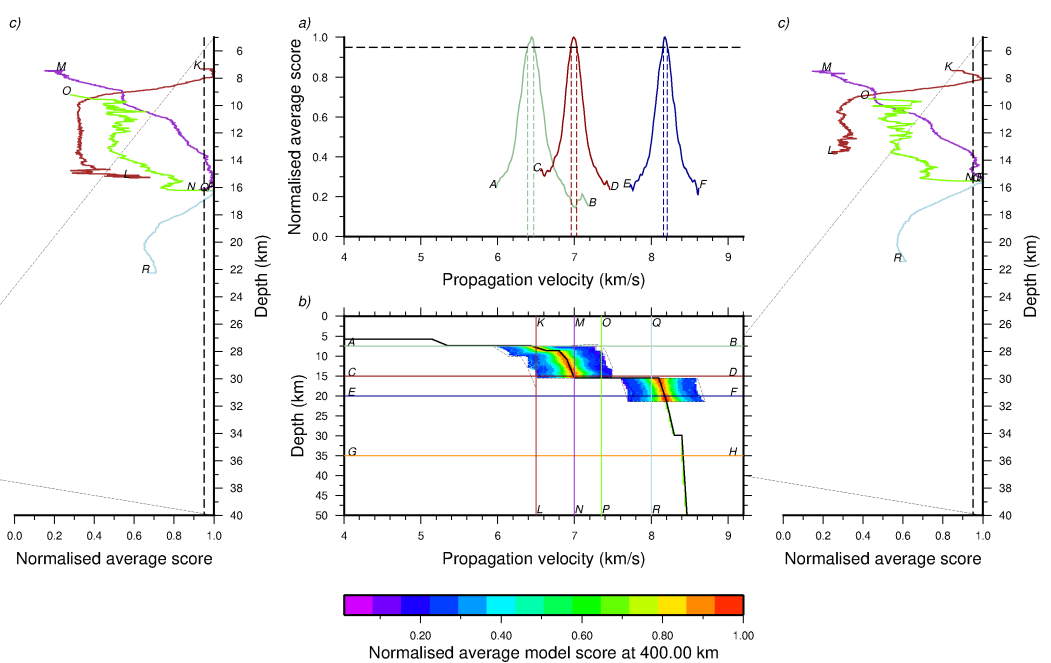

Supplement: Supplementary file 1 [file se-12-1865-2021-supplement.pdf]
